# Supplementary material for: Genome sequencing reveals a new lineage associated with lablab bean and genetic exchange between Xanthomonas axonopodis pv. phaseoli and Xanthomonas fuscans subsp. fuscans
Source: Front Microbiol. 2015 Oct 7;6:1080. doi: 10.3389/fmicb.2015.01080 (PMC4595841; doi:10.3389/fmicb.2015.01080)
Supplement: Supplementary file 1 [file SNPs(Harvest).CSV]

##FILTER=<ID=IND,Description="Column contains indel">
##FILTER=<ID=N,Description="Column contains N">
##FILTER=<ID=LCB,Description="LCB smaller than 200bp">
##FILTER=<ID=CID,Description="SNP in aligned 100bp window with < 50% column % ID">
##FILTER=<ID=ALN,Description="SNP in aligned 100b window with > 20 indels">
#CHROM	POS	ID	REF	ALT	QUAL	FILTER	INFO	FORMAT	X_fuscans_subsp_fuscans_4834-R.fna	X_perforans_91_118	X_axonopodis_pv_manihotis_ORST_X27	X_axonopodis_pv_manihotis_IBSBF_2673	X_axonopodis_pv_manihotis_UA560	X_axonopodis_pv_manihotis_Xam678	X_axonopodis_pv_manihotis_UA306	X_citri_pv_citri_XACJK48	X_citri_subsp_citri_NT17	X_axonopodis_pv_phaseoli_NCPPB381	X_axonopodis_pv_manihotis_CIO151	X_axonopodis_pv_phaseoli_NCPPB556	X_axonopodis_pv_phaseoli_NCPPB1713	X_axonopodis_pv_phaseoli_NCPPB220	X_citri_pv_citri_XAC3612	X_axonopodis_pv_phaseoli_NCPPB3660	X_axonopodis_pv_manihotis_IBSBF_2822	X_citri_pv_malvacearum_X18	X_citri_pv_citri_XAC3607	X_axonopodis_pv_manihotis_IBSBF_1182	X_axonopodis_pv_manihotis_IBSBF_2672	X_axonopodis_pv_manihotis_UG43	X_citri_pv_citri_XACG102	X_axonopodis_pv_phaseoli_NCPPB2665	X_axonopodis_pv_manihotis_IBSBF_726	X_axonopodis_pv_manihotis_IBSBF_2816	X_axonopodis_pv_phaseoli_NCPPB1646	X_citri_subsp_citri_MN12	X_citri_subsp_citri_gd2	X_citri_pv_citri_XAC4311	X_citri_subsp_citri_AW16	X_citri_pv_citri_XACLG97	X_citri_pv_mangiferaeindicae_LMG_941	X_axonopodis_pv_manihotis_IBSBF_2539	X_axonopodis_pv_manihotis_IBSBF_289	X_axonopodis_pv_phaseoli_NCPPB1138	X_axonopodis_pv_manihotis_IBSBF_1411	X_citri_pv_citri_XACS581	X_axonopodis_pv_citri_306	X_citri_subsp_citri_jx5	X_citri_pv_citri_XACJJ10
NC_022541	57	CGCCCGAAGA.TGTCCACACC	T	C	40	PASS	NA	GT	0	0	0	0	0	0	0	0	0	0	0	0	0	0	0	0	0	0	0	0	0	0	0	0	0	0	0	0	0	0	0	0	0	0	0	0	0	0	0	0	0
NC_022541	63	AAGATGTCCA.CACCTGGTTG	C	T	40	PASS	NA	GT	0	0	1	1	1	1	1	0	0	0	1	0	0	1	0	0	1	0	0	1	1	1	0	0	1	1	1	0	0	0	0	0	0	1	1	1	1	0	0	0	0
NC_022541	105	GCGGCGACAG.CATCGTGCTG	C	T	40	PASS	NA	GT	0	0	0	0	0	0	0	0	0	0	0	0	0	0	0	0	0	0	0	0	0	0	0	0	0	0	0	0	0	0	0	0	0	0	0	0	0	0	0	0	0
NC_022541	120	TGCTGTACGC.CCCGAACGCC	C	T,A	40	PASS	NA	GT	0	0	0	0	0	0	0	1	1	0	0	0	0	0	1	0	0	0	1	0	0	0	1	0	0	0	0	1	1	1	1	1	0	0	0	0	0	1	1	1	1
NC_022541	126	ACGCCCCGAA.CGCCTTCATC	C	T	40	PASS	NA	GT	0	0	0	0	0	0	0	0	0	0	0	0	0	0	0	0	0	0	0	0	0	0	0	0	0	0	0	0	0	0	0	0	0	0	0	0	0	0	0	0	0
NC_022541	138	CCTTCATCGT.CGACCAGGTG	C	T	40	PASS	NA	GT	0	0	0	0	0	0	0	0	0	0	0	0	0	0	0	0	0	0	0	0	0	0	0	0	0	0	0	0	0	0	0	0	0	0	0	0	0	0	0	0	0
NC_022541	147	TCGACCAGGT.GCGCGAACGG	G	T,C	40	PASS	NA	GT	0	1	1	1	1	1	1	0	0	0	1	0	0	1	0	0	1	0	0	1	1	1	0	0	1	1	1	0	0	0	0	0	0	1	1	1	1	0	0	0	0
NC_022541	156	TGCGCGAACG.GTACCTGCCG	G	T,C	40	PASS	NA	GT	0	0	0	0	0	0	0	1	1	0	0	1	1	0	1	0	0	0	1	0	0	0	1	0	0	0	0	1	1	1	1	1	0	0	0	0	0	1	1	1	1
NC_022541	158	CGCGAACGGT.ACCTGCCGCG	A	C	40	PASS	NA	GT	0	0	0	0	0	0	0	0	0	0	0	0	0	0	0	0	0	0	0	0	0	0	1	0	0	0	0	0	0	0	0	0	0	0	0	0	0	0	0	0	0
NC_022541	159	GCGAACGGTA.CCTGCCGCGC	C	T	40	PASS	NA	GT	0	0	0	0	0	0	0	0	0	0	0	0	0	0	0	0	0	1	0	0	0	0	0	0	0	0	0	0	0	0	0	0	1	0	0	0	0	0	0	0	0
NC_022541	171	TGCCGCGCAT.TCGCGAACTG	T	C	40	PASS	NA	GT	0	1	0	0	0	0	0	0	0	0	0	0	0	0	0	0	0	0	0	0	0	0	0	0	0	0	0	0	0	0	0	0	0	0	0	0	0	0	0	0	0
NC_022541	178	CATTCGCGAA.CTGCTGGCGT	C	T	40	PASS	NA	GT	0	1	1	1	1	1	1	1	1	0	1	1	1	1	1	0	1	1	1	1	1	1	1	0	1	1	1	1	1	1	1	1	1	1	1	1	1	1	1	1	1
NC_022541	189	TGCTGGCGTA.TTTCGCCGGC	T	C	40	PASS	NA	GT	0	0	0	0	0	0	0	0	0	0	0	0	0	0	0	0	0	0	0	0	0	0	0	0	0	0	0	0	0	0	0	0	0	0	0	0	0	0	0	0	0
NC_022541	194	GCGTATTTCG.CCGGCAATGG	C	T	40	PASS	NA	GT	0	0	0	0	0	0	0	1	1	0	0	0	0	0	1	0	0	0	1	0	0	0	1	0	0	0	0	1	1	1	1	1	0	0	0	0	0	1	1	1	1
NC_022541	195	CGTATTTCGC.CGGCAATGGC	C	T	40	PASS	NA	GT	0	0	0	0	0	0	0	0	0	0	0	0	0	0	0	0	0	0	0	0	0	0	0	0	0	0	0	0	0	0	0	0	0	0	0	0	0	0	0	0	0
NC_022541	198	ATTTCGCCGG.CAATGGCGAA	C	T	40	PASS	NA	GT	0	0	1	1	1	1	1	0	0	0	1	0	0	1	0	0	1	0	0	1	1	1	0	0	1	1	1	0	0	0	0	0	0	1	1	1	1	0	0	0	0
NC_022541	201	TCGCCGGCAA.TGGCGAAGTC	T	C	40	PASS	NA	GT	0	1	0	0	0	0	0	0	0	0	0	0	0	0	0	0	0	0	0	0	0	0	0	0	0	0	0	0	0	0	0	0	0	0	0	0	0	0	0	0	0
NC_022541	207	GCAATGGCGA.AGTCGCGCTG	A	C	40	PASS	NA	GT	0	0	0	0	0	0	0	1	1	0	0	1	1	0	1	0	0	1	1	0	0	0	1	0	0	0	0	1	1	1	1	1	1	0	0	0	0	1	1	1	1
NC_022541	214	CGAAGTCGCG.CTGGCGGTCG	C	T	40	PASS	NA	GT	0	0	0	0	0	0	0	0	0	0	0	0	0	0	0	0	0	0	0	0	0	0	0	0	0	0	0	0	0	0	0	0	0	0	0	0	0	0	0	0	0
NC_022541	222	CGCTGGCGGT.CGGTTCGCGT	C	T	40	PASS	NA	GT	0	0	1	1	1	1	1	0	0	0	1	0	0	1	0	0	1	0	0	1	1	1	0	0	1	1	1	0	0	0	0	0	0	1	1	1	1	0	0	0	0
NC_022541	234	GTTCGCGTCC.ACGTGCGCCC	A	G	40	PASS	NA	GT	0	0	1	1	1	1	1	0	0	0	1	0	0	1	0	0	1	0	0	1	1	1	0	0	1	1	1	0	0	0	0	0	0	1	1	1	1	0	0	0	0
NC_022541	237	CGCGTCCACG.TGCGCCCGAG	T	C	40	PASS	NA	GT	0	0	0	0	0	0	0	1	1	0	0	1	1	0	1	0	0	1	1	0	0	0	1	0	0	0	0	1	1	1	1	1	1	0	0	0	0	1	1	1	1
NC_022541	240	GTCCACGTGC.GCCCGAGCCG	G	A	40	PASS	NA	GT	0	0	0	0	0	0	0	0	0	0	0	0	0	0	0	0	0	0	0	0	0	0	0	0	0	0	0	0	0	0	0	0	0	0	0	0	0	0	0	0	0
NC_022541	243	CACGTGCGCC.CGAGCCGGCC	C	G,T	40	PASS	NA	GT	0	0	1	1	1	1	1	0	0	0	1	0	0	1	0	0	1	0	0	1	1	1	0	0	1	1	1	0	0	0	0	0	0	1	1	1	1	0	0	0	0
NC_022541	251	CCCGAGCCGG.CCCCTGCACC	C	T	40	PASS	NA	GT	0	0	0	0	0	0	0	0	0	0	0	0	0	0	0	0	0	0	0	0	0	0	0	0	0	0	0	0	0	0	0	0	1	0	0	0	0	0	0	0	0
NC_022541	252	CCGAGCCGGC.CCCTGCACCC	C	T	40	PASS	NA	GT	0	0	1	1	1	1	1	0	0	0	1	0	0	1	0	0	1	0	0	1	1	1	0	0	1	1	1	0	0	0	0	0	0	1	1	1	1	0	0	0	0
NC_022541	255	AGCCGGCCCC.TGCACCCGTG	T	C,G	40	PASS	NA	GT	0	1	2	2	2	2	2	0	0	0	2	0	0	2	0	0	2	0	0	2	2	2	0	0	2	2	2	0	0	0	0	0	0	2	2	2	2	0	0	0	0
NC_022541	258	CGGCCCCTGC.ACCCGTGGCC	A	G	40	PASS	NA	GT	0	0	0	0	0	0	0	0	0	0	0	0	0	0	0	0	0	0	0	0	0	0	0	0	0	0	0	0	0	0	0	0	0	0	0	0	0	0	0	0	0
NC_022541	259	GGCCCCTGCA.CCCGTGGCCG	C	G	40	PASS	NA	GT	0	1	0	0	0	0	0	0	0	0	0	0	0	0	0	0	0	0	0	0	0	0	0	0	0	0	0	0	0	0	0	0	0	0	0	0	0	0	0	0	0
NC_022541	261	CCCCTGCACC.CGTGGCCGTG	C	G	40	PASS	NA	GT	0	1	0	0	0	0	0	0	0	0	0	0	0	0	0	0	0	0	0	0	0	0	0	0	0	0	0	0	0	0	0	0	0	0	0	0	0	0	0	0	0
NC_022541	263	CCTGCACCCG.TGGCCGTGAT	T	C	40	PASS	NA	GT	0	1	0	0	0	0	0	0	0	0	0	0	0	0	0	0	0	0	0	0	0	0	0	0	0	0	0	0	0	0	0	0	0	0	0	0	0	0	0	0	0
NC_022541	267	CACCCGTGGC.CGTGATGAGC	C	G	40	PASS	NA	GT	0	1	1	1	1	1	1	0	0	0	1	0	0	1	0	0	1	0	0	1	1	1	0	0	1	1	1	0	0	0	0	0	0	1	1	1	1	0	0	0	0
NC_022541	268	ACCCGTGGCC.GTGATGAGCG	G	A	40	PASS	NA	GT	0	0	1	1	1	1	1	0	0	0	1	0	0	1	0	0	1	0	0	1	1	1	0	0	1	1	1	0	0	0	0	0	0	1	1	1	1	0	0	0	0
NC_022541	269	CCCGTGGCCG.TGATGAGCGC	T	C	40	PASS	NA	GT	0	0	1	1	1	1	1	0	0	0	1	0	0	1	0	0	1	0	0	1	1	1	0	0	1	1	1	0	0	0	0	0	0	1	1	1	1	0	0	0	0
NC_022541	271	CGTGGCCGTG.ATGAGCGCGC	A	C	40	PASS	NA	GT	0	1	1	1	1	1	1	1	1	0	1	1	1	1	1	0	1	1	1	1	1	1	1	0	1	1	1	1	1	1	1	1	1	1	1	1	1	1	1	1	1
NC_022541	272	GTGGCCGTGA.TGAGCGCGCC	T	C	40	PASS	NA	GT	0	1	1	1	1	1	1	1	1	0	1	1	1	1	1	0	1	1	1	1	1	1	1	0	1	1	1	1	1	1	1	1	1	1	1	1	1	1	1	1	1
NC_022541	273	TGGCCGTGAT.GAGCGCGCCG	G	A	40	PASS	NA	GT	0	1	0	0	0	0	0	0	0	0	0	0	0	0	0	0	0	0	0	0	0	0	0	0	0	0	0	0	0	0	0	0	0	0	0	0	0	0	0	0	0
NC_022541	276	CCGTGATGAG.CGCGCCGCAG	C	T	40	PASS	NA	GT	0	1	1	1	1	1	1	0	0	0	1	0	0	1	0	0	1	0	0	1	1	1	0	0	1	1	1	0	0	0	0	0	0	1	1	1	1	0	0	0	0
NC_022541	279	TGATGAGCGC.GCCGCAGGCT	G	A	40	PASS	NA	GT	0	0	0	0	0	0	0	0	0	0	0	0	0	0	0	0	0	0	0	0	0	0	0	0	0	0	0	0	0	0	0	0	0	0	0	0	0	0	0	0	0
NC_022541	281	ATGAGCGCGC.CGCAGGCTGC	C	T	40	PASS	NA	GT	0	0	0	0	0	0	0	0	0	0	0	0	0	0	0	0	0	0	0	0	0	0	0	0	0	0	0	0	0	0	0	0	0	0	0	0	0	0	0	0	0
NC_022541	282	TGAGCGCGCC.GCAGGCTGCA	G	C	40	PASS	NA	GT	0	1	0	0	0	0	0	0	0	0	0	0	0	0	0	0	0	0	0	0	0	0	0	0	0	0	0	0	0	0	0	0	0	0	0	0	0	0	0	0	0
NC_022541	291	CGCAGGCTGC.ACCGATCGTG	A	G	40	PASS	NA	GT	0	0	0	0	0	0	0	0	0	0	0	0	0	0	0	0	0	0	0	0	0	0	0	0	0	0	0	0	0	0	0	0	0	0	0	0	0	0	0	0	0
NC_022541	297	CTGCACCGAT.CGTGCCGTTC	C	G	40	PASS	NA	GT	0	1	0	0	0	0	0	0	0	0	0	0	0	0	0	0	0	0	0	0	0	0	0	0	0	0	0	0	0	0	0	0	0	0	0	0	0	0	0	0	0
NC_022541	336	ATTACACCTT.CGCCAACTTC	C	T	40	PASS	NA	GT	0	0	0	0	0	0	0	0	0	0	0	0	0	0	0	0	0	0	0	0	0	0	0	0	0	0	0	0	0	0	0	0	0	0	0	0	0	0	0	0	0
NC_022541	348	CCAACTTCGT.GGAAGGCCGT	G	C	40	PASS	NA	GT	0	1	1	1	1	1	1	0	0	0	1	0	0	1	0	0	1	0	0	1	1	1	0	0	1	1	1	0	0	0	0	0	0	1	1	1	1	0	0	0	0
NC_022541	357	TGGAAGGCCG.TAGCAACCAG	T	C	40	PASS	NA	GT	0	1	1	1	1	1	1	1	1	0	1	1	1	1	1	0	1	1	1	1	1	1	1	0	1	1	1	1	1	1	1	1	1	1	1	1	1	1	1	1	1
NC_022541	367	TAGCAACCAG.TTGGGCCTGG	T	C	40	PASS	NA	GT	0	1	1	1	1	1	1	0	0	0	1	0	0	1	0	0	1	0	0	1	1	1	0	0	1	1	1	0	0	0	0	0	0	1	1	1	1	0	0	0	0
NC_022541	372	ACCAGTTGGG.CCTGGCGGCC	C	T,A	40	PASS	NA	GT	0	1	1	1	1	1	1	0	0	0	1	0	0	1	0	0	1	0	0	1	1	1	0	0	1	1	1	0	0	0	0	0	0	1	1	1	1	0	0	0	0
NC_022541	378	TGGGCCTGGC.GGCCGCGATC	G	C	40	PASS	NA	GT	0	1	0	0	0	0	0	0	0	0	0	0	0	0	0	0	0	0	0	0	0	0	0	0	0	0	0	0	0	0	0	0	0	0	0	0	0	0	0	0	0
NC_022541	381	GCCTGGCGGC.CGCGATCCAG	C	G	40	PASS	NA	GT	0	0	1	1	1	1	1	0	0	0	1	0	0	1	0	0	1	0	0	1	1	1	0	0	1	1	1	0	0	0	0	0	0	1	1	1	1	0	0	0	0
NC_022541	387	CGGCCGCGAT.CCAGGCTGCA	C	T	40	PASS	NA	GT	0	1	0	0	0	0	0	0	0	0	0	0	0	0	0	0	0	0	0	0	0	0	0	0	0	0	0	0	0	0	0	0	0	0	0	0	0	0	0	0	0
NC_022541	393	CGATCCAGGC.TGCACAGAAG	T	G	40	PASS	NA	GT	0	1	1	1	1	1	1	0	0	0	1	0	0	1	0	0	1	0	0	1	1	1	0	0	1	1	1	0	0	0	0	0	0	1	1	1	1	0	0	0	0
NC_022541	396	TCCAGGCTGC.ACAGAAGCCC	A	G	40	PASS	NA	GT	0	1	1	1	1	1	1	0	0	0	1	0	0	1	0	0	1	0	0	1	1	1	0	0	1	1	1	0	0	0	0	0	0	1	1	1	1	0	0	0	0
NC_022541	401	GCTGCACAGA.AGCCCGGCGA	A	G	40	PASS	NA	GT	0	0	0	0	0	0	0	0	0	0	0	0	0	0	0	0	0	0	0	0	0	0	0	0	0	0	0	0	0	0	0	0	0	0	0	0	0	0	0	0	0
NC_022541	402	CTGCACAGAA.GCCCGGCGAG	G	A,C	40	PASS	NA	GT	0	0	1	1	1	1	1	0	0	0	1	0	0	1	0	0	1	0	0	1	1	1	0	0	1	1	1	0	0	0	0	0	0	1	1	1	1	0	0	0	0
NC_022541	411	AGCCCGGCGA.GCGTGCGCAC	G	C	40	PASS	NA	GT	0	1	1	1	1	1	1	1	1	0	1	1	1	1	1	0	1	1	1	1	1	1	1	0	1	1	1	1	1	1	1	1	1	1	1	1	1	1	1	1	1
NC_022541	414	CCGGCGAGCG.TGCGCACAAC	T	C,G	40	PASS	NA	GT	0	1	1	1	1	1	1	0	0	0	1	0	0	1	0	0	1	0	0	1	1	1	0	0	1	1	1	0	0	0	0	0	0	1	1	1	1	0	0	0	0
NC_022541	417	GCGAGCGTGC.GCACAACCCG	G	A	40	PASS	NA	GT	0	0	0	0	0	0	0	1	1	0	0	1	1	0	1	0	0	0	1	0	0	0	1	0	0	0	0	1	1	1	1	1	0	0	0	0	0	1	1	1	1
NC_022541	450	GCAGCACCGG.TCTGGGCAAG	T	C	40	PASS	NA	GT	0	1	1	1	1	1	1	0	0	0	1	0	0	1	0	0	1	0	0	1	1	1	0	0	1	1	1	0	0	0	0	0	0	1	1	1	1	0	0	0	0
NC_022541	465	GCAAGACCCA.CCTGATGTTC	C	T	40	PASS	NA	GT	0	0	0	0	0	0	0	0	0	0	0	0	0	0	0	0	0	0	0	0	0	0	0	0	0	0	0	0	0	0	0	0	0	0	0	0	0	0	0	0	0
NC_022541	504	GTCAGGCCAA.TCCGGCCGCC	T	C,A	40	PASS	NA	GT	0	0	1	1	1	1	1	0	0	0	1	0	0	1	0	0	1	0	0	1	1	1	0	0	1	1	1	0	0	0	0	0	0	1	1	1	1	0	0	0	0
NC_022541	516	CGGCCGCCAA.AGTGATGTAT	A	G	40	PASS	NA	GT	0	1	1	1	1	1	1	1	1	0	1	1	1	1	1	0	1	1	1	1	1	1	1	0	1	1	1	1	1	1	1	1	1	1	1	1	1	1	1	1	1
NC_022541	520	CGCCAAAGTG.ATGTATCTGC	A	G	40	PASS	NA	GT	0	0	0	0	0	0	0	0	0	0	0	0	0	1	0	0	0	0	0	0	0	0	0	0	0	0	1	0	0	0	0	0	0	0	0	1	0	0	0	0	0
NC_022541	525	AAGTGATGTA.TCTGCGTTCG	T	C	40	PASS	NA	GT	0	1	1	1	1	1	1	0	0	0	1	0	0	1	0	0	1	0	0	1	1	1	0	0	1	1	1	0	0	0	0	0	0	1	1	1	1	0	0	0	0
NC_022541	531	TGTATCTGCG.TTCGGAGCAG	T	C	40	PASS	NA	GT	0	0	0	0	0	0	0	0	0	0	0	0	0	0	0	0	0	0	0	0	0	0	0	0	0	0	0	0	0	0	0	0	1	0	0	0	0	0	0	0	0
NC_022541	537	TGCGTTCGGA.GCAGTTCTTC	G	A	40	PASS	NA	GT	0	1	1	1	1	1	1	0	0	0	1	0	0	1	0	0	1	0	0	1	1	1	0	0	1	1	1	0	0	0	0	0	0	1	1	1	1	0	0	0	0
NC_022541	543	CGGAGCAGTT.CTTCAGCGCG	C	T	40	PASS	NA	GT	0	0	0	0	0	0	0	0	0	0	0	0	0	0	0	0	0	0	0	0	0	0	0	0	0	0	0	0	0	0	0	0	0	0	0	0	0	0	0	0	0
NC_022541	549	AGTTCTTCAG.CGCGATGATC	C	T	40	PASS	NA	GT	0	0	0	0	0	0	0	0	0	0	0	1	1	0	0	0	0	0	0	0	0	0	0	0	0	0	0	0	0	0	0	0	0	0	0	0	0	0	0	0	0
NC_022541	603	AGCGCCAGTT.CCAGCAGATC	C	T	40	PASS	NA	GT	0	0	0	0	0	0	0	0	0	0	0	0	0	0	0	0	0	0	0	0	0	0	0	0	0	0	0	0	0	0	0	0	0	0	0	0	0	0	0	0	0
NC_022541	612	TCCAGCAGAT.CGATGCGCTG	C	T	40	PASS	NA	GT	0	0	0	0	0	0	0	0	0	0	0	0	0	0	0	0	0	0	0	0	0	0	0	0	0	0	0	0	0	0	0	0	0	0	0	0	0	0	0	0	0
NC_022541	663	AGGACCGCAC.GCAGGAAGAG	G	C	40	PASS	NA	GT	0	1	0	0	0	0	0	1	1	0	0	1	1	0	1	0	0	1	1	0	0	0	1	0	0	0	0	1	1	1	1	1	1	0	0	0	0	1	1	1	1
NC_022541	672	CGCAGGAAGA.GTTCTTCCAC	G	A	40	PASS	NA	GT	0	0	0	0	0	0	0	0	0	0	0	0	0	0	0	0	0	0	0	0	0	0	0	0	0	0	0	0	0	0	0	0	0	0	0	0	0	0	0	0	0
NC_022541	708	TCGATGGCCG.CCAGCAGATC	C	T	40	PASS	NA	GT	0	0	0	1	0	0	0	0	0	0	0	0	0	0	0	0	1	0	0	1	1	0	0	0	1	1	0	0	0	0	0	0	0	0	0	0	1	0	0	0	0
NC_022541	711	ATGGCCGCCA.GCAGATCATC	G	A	40	PASS	NA	GT	0	0	0	0	0	0	0	1	1	0	0	0	0	0	1	0	0	1	1	0	0	0	1	0	0	0	0	1	1	1	1	1	1	0	0	0	0	1	1	1	1
NC_022541	714	GCCGCCAGCA.GATCATCCTG	G	A	40	PASS	NA	GT	0	0	0	0	0	0	0	0	0	0	0	0	0	0	0	0	0	0	0	0	0	0	0	0	0	0	0	0	0	0	0	0	0	0	0	0	0	0	0	0	0
NC_022541	732	TGACCTGCGA.CCGCTACCCG	C	T	40	PASS	NA	GT	0	0	0	0	0	0	0	0	0	0	0	0	0	0	0	0	0	1	0	0	0	0	0	0	0	0	0	0	0	0	0	0	0	0	0	0	0	0	0	0	0
NC_022541	738	GCGACCGCTA.CCCGCGCGAG	C	T	40	PASS	NA	GT	0	0	1	1	1	1	1	0	0	0	1	0	0	1	0	0	1	0	0	1	1	1	0	0	1	1	1	0	0	0	0	0	0	1	1	1	1	0	0	0	0
NC_022541	744	GCTACCCGCG.CGAGGTCGAA	C	T	40	PASS	NA	GT	0	0	0	0	0	0	0	0	0	0	0	0	0	0	0	0	0	0	0	0	0	0	0	0	0	0	0	0	0	0	0	0	0	0	0	0	0	0	0	0	0
NC_022541	747	ACCCGCGCGA.GGTCGAAGGC	G	A	40	PASS	NA	GT	0	1	0	0	0	0	0	0	0	0	0	0	0	1	0	0	0	0	0	0	0	0	0	0	0	0	1	0	0	0	0	0	0	0	0	1	0	0	0	0	0
NC_022541	750	CGCGCGAGGT.CGAAGGCCTG	C	G	40	PASS	NA	GT	0	1	1	1	1	1	1	0	0	0	1	0	0	1	0	0	1	0	0	1	1	1	0	0	1	1	1	0	0	0	0	0	0	1	1	1	1	0	0	0	0
NC_022541	753	GCGAGGTCGA.AGGCCTGGAG	A	G	40	PASS	NA	GT	0	0	0	0	0	0	0	0	0	0	0	0	0	0	0	0	0	0	0	0	0	0	0	0	0	0	0	0	0	0	0	0	0	0	0	0	0	0	0	0	0
NC_022541	759	TCGAAGGCCT.GGAGCCGCGG	G	A	40	PASS	NA	GT	0	0	0	0	0	0	0	0	0	0	0	0	0	0	0	0	0	0	0	0	0	0	0	0	0	0	0	0	0	0	0	0	0	0	0	0	0	0	0	0	0
NC_022541	768	TGGAGCCGCG.GCTGAAGTCG	G	C	40	PASS	NA	GT	0	1	0	0	0	0	0	0	0	0	0	0	0	0	0	0	0	0	0	0	0	0	0	0	0	0	0	0	0	0	0	0	0	0	0	0	0	0	0	0	0
NC_022541	780	TGAAGTCGCG.CCTGGCCTGG	C	G	40	PASS	NA	GT	0	0	0	0	0	0	0	0	0	0	0	0	0	1	0	0	0	0	0	0	0	0	0	0	0	0	1	0	0	0	0	0	0	0	0	1	0	0	0	0	0
NC_022541	793	GGCCTGGGGC.CTGTCGGTGG	C	T	40	PASS	NA	GT	0	0	0	0	0	0	0	0	0	0	0	0	0	0	0	0	0	0	0	0	0	0	0	0	0	0	0	0	0	0	0	0	0	0	0	0	0	0	0	0	0
NC_022541	795	CCTGGGGCCT.GTCGGTGGCG	G	T	40	PASS	NA	GT	0	0	1	1	1	1	1	0	0	0	1	0	0	1	0	0	1	0	0	1	1	1	0	0	1	1	1	0	0	0	0	0	0	1	1	1	1	0	0	0	0
NC_022541	801	GCCTGTCGGT.GGCGATCGAC	G	A	40	PASS	NA	GT	0	0	0	0	0	0	0	0	0	0	0	0	0	0	0	0	0	0	0	0	0	0	0	0	0	0	0	0	0	0	0	0	0	0	0	0	0	0	0	0	0
NC_022541	810	TGGCGATCGA.CCCGCCGGAC	C	T	40	PASS	NA	GT	0	0	0	0	0	0	0	0	0	0	0	0	0	0	0	0	0	0	0	0	0	0	0	0	0	0	0	0	0	0	0	0	0	0	0	0	0	0	0	0	0
NC_022541	813	CGATCGACCC.GCCGGACTTC	G	A	40	PASS	NA	GT	0	0	0	0	0	0	0	0	0	0	0	0	0	0	0	0	0	0	0	0	0	0	0	0	0	0	0	0	0	0	0	0	0	0	0	0	0	0	0	0	0
NC_022541	819	ACCCGCCGGA.CTTCGAGACC	C	T	40	PASS	NA	GT	0	0	0	0	0	0	0	0	0	0	0	0	0	0	0	0	0	0	0	0	0	0	0	0	0	0	0	0	0	0	0	0	0	0	0	0	0	0	0	0	0
NC_022541	822	CGCCGGACTT.CGAGACCCGC	C	T	40	PASS	NA	GT	0	1	0	0	0	0	0	0	0	0	0	0	0	0	0	0	0	0	0	0	0	0	0	0	0	0	0	0	0	0	0	0	0	0	0	0	0	0	0	0	0
NC_022541	825	CGGACTTCGA.GACCCGCGCG	G	A	40	PASS	NA	GT	0	1	0	0	0	0	0	0	0	0	0	0	0	0	0	0	0	0	0	0	0	0	0	0	0	0	0	0	0	0	0	0	0	0	0	0	0	0	0	0	0
NC_022541	828	ACTTCGAGAC.CCGCGCGGCC	C	A	40	PASS	NA	GT	0	0	0	0	0	0	0	0	0	0	0	0	0	0	0	0	0	0	0	0	0	0	0	0	0	0	0	0	0	0	0	0	0	0	0	0	0	0	0	0	0
NC_022541	834	AGACCCGCGC.GGCCATCGTG	G	A	40	PASS	NA	GT	0	0	0	0	0	0	0	0	0	0	0	0	0	0	0	0	0	0	0	0	0	0	0	0	0	0	0	0	0	0	0	0	0	0	0	0	0	0	0	0	0
NC_022541	837	CCCGCGCGGC.CATCGTGCTG	C	G	40	PASS	NA	GT	0	0	1	1	1	1	1	0	0	0	1	0	0	1	0	0	1	0	0	1	1	1	0	0	1	1	1	0	0	0	0	0	0	1	1	1	1	0	0	0	0
NC_022541	840	GCGCGGCCAT.CGTGCTGGCC	C	T	40	PASS	NA	GT	0	0	0	0	0	0	0	0	0	0	0	0	0	0	0	0	0	0	0	0	0	0	0	0	0	0	0	0	0	0	0	0	0	0	0	0	0	0	0	0	0
NC_022541	855	TGGCCAAGGC.GCGCGAGCGC	G	A	40	PASS	NA	GT	0	1	0	0	0	0	0	0	0	0	0	0	0	0	0	0	0	0	0	0	0	0	0	0	0	0	0	0	0	0	0	0	0	0	0	0	0	0	0	0	0
NC_022541	864	CGCGCGAGCG.CGGCGCCGAG	C	T	40	PASS	NA	GT	0	0	0	0	0	0	0	0	0	0	0	0	0	0	0	0	0	0	0	0	0	0	0	0	0	0	0	0	0	0	0	0	0	0	0	0	0	0	0	0	0
NC_022541	873	GCGGCGCCGA.GATTCCCGAC	G	A	40	PASS	NA	GT	0	1	0	0	0	0	0	1	1	0	0	1	1	0	1	0	0	1	1	0	0	0	1	0	0	0	0	1	1	1	1	1	1	0	0	0	0	1	1	1	1
NC_022541	891	ACGACGTGGC.ATTCCTGATC	A	C	40	PASS	NA	GT	0	0	1	1	1	1	1	0	0	0	1	0	0	1	0	0	1	0	0	1	1	1	0	0	1	1	1	0	0	0	0	0	0	1	1	1	1	0	0	0	0
NC_022541	918	AGATGCGCTC.CAACGTGCGC	C	G	40	PASS	NA	GT	0	0	0	0	0	0	0	0	0	0	0	0	0	0	0	0	0	0	0	0	0	0	0	0	0	0	0	0	0	0	0	0	0	0	0	0	0	0	0	0	0
NC_022541	933	TGCGCGACCT.CGAAGGCGCG	C	G,T	40	PASS	NA	GT	0	1	1	1	1	1	1	2	2	0	1	2	2	1	2	0	1	2	2	1	1	1	2	0	1	1	1	2	2	2	2	2	2	1	1	1	1	2	2	2	2
NC_022541	939	ACCTCGAAGG.CGCGCTCAAC	C	T	40	PASS	NA	GT	0	0	0	0	0	0	0	0	0	0	0	0	0	0	0	0	0	0	0	0	0	0	0	0	0	0	0	0	0	0	0	0	0	0	0	0	0	0	0	0	0
NC_022541	951	CGCTCAACAC.CCTGGTGGCG	C	G	40	PASS	NA	GT	0	0	0	0	0	0	0	1	1	0	0	1	1	0	1	0	0	1	1	0	0	0	1	0	0	0	0	1	1	1	1	1	1	0	0	0	0	1	1	1	1
NC_022541	963	TGGTGGCGCG.TGCAAACTTC	T	C	40	PASS	NA	GT	0	0	0	0	0	0	0	0	0	0	0	0	0	0	0	0	0	0	0	0	0	0	0	0	0	0	0	0	0	0	0	0	0	0	0	0	0	0	0	0	0
NC_022541	966	TGGCGCGTGC.AAACTTCACC	A	C	40	PASS	NA	GT	0	1	1	1	1	1	1	1	1	0	1	1	1	1	1	0	1	1	1	1	1	1	1	0	1	1	1	1	1	1	1	1	1	1	1	1	1	1	1	1	1
NC_022541	969	CGCGTGCAAA.CTTCACCGGG	C	T	40	PASS	NA	GT	0	0	0	0	0	0	0	0	0	0	0	0	0	0	0	0	0	0	0	0	0	0	0	0	0	0	0	0	0	0	0	0	0	0	0	0	0	0	0	0	0
NC_022541	975	CAAACTTCAC.CGGGCGCTCG	C	A	40	PASS	NA	GT	0	0	0	0	0	0	0	0	0	0	0	0	0	0	0	0	0	1	0	0	0	0	0	0	0	0	0	0	0	0	0	0	0	0	0	0	0	0	0	0	0
NC_022541	978	ACTTCACCGG.GCGCTCGATC	G	C	40	PASS	NA	GT	0	1	1	1	1	1	1	0	0	0	1	0	0	1	0	0	1	0	0	1	1	1	0	0	1	1	1	0	0	0	0	0	0	1	1	1	1	0	0	0	0
NC_022541	982	CACCGGGCGC.TCGATCACGG	T	G	40	PASS	NA	GT	0	0	1	1	1	1	1	0	0	0	1	0	0	1	0	0	1	0	0	1	1	1	0	0	1	1	1	0	0	0	0	0	0	1	1	1	1	0	0	0	0
NC_022541	990	GCTCGATCAC.GGTGGAATTC	G	T,C	40	PASS	NA	GT	0	0	1	1	1	1	1	0	0	0	1	0	0	0	0	0	1	0	0	1	1	1	0	0	1	1	0	0	0	0	0	0	0	1	1	0	1	0	0	0	0
NC_022541	992	TCGATCACGG.TGGAATTCGC	T	C	40	PASS	NA	GT	0	0	0	0	0	0	0	0	0	0	0	0	0	0	0	0	0	0	0	0	0	0	0	0	0	0	0	0	0	0	0	0	0	0	0	0	0	0	0	0	0
NC_022541	999	CGGTGGAATT.CGCCCAGGAG	C	T	40	PASS	NA	GT	0	1	1	1	1	1	1	1	1	0	1	1	1	1	1	0	1	1	1	1	1	1	1	0	1	1	1	1	1	1	1	1	1	1	1	1	1	1	1	1	1
NC_022541	1017	AGACGCTGCG.CGACCTGCTT	C	T	40	PASS	NA	GT	0	0	1	1	1	1	1	0	0	0	1	0	0	1	0	0	1	0	0	1	1	1	0	0	1	1	1	0	0	0	0	0	0	1	1	1	1	0	0	0	0
NC_022541	1020	CGCTGCGCGA.CCTGCTTCGC	C	T	40	PASS	NA	GT	0	1	0	0	0	0	0	0	0	0	0	0	0	0	0	0	0	0	0	0	0	0	0	0	0	0	0	0	0	0	0	0	0	0	0	0	0	0	0	0	0
NC_022541	1021	GCTGCGCGAC.CTGCTTCGCG	C	T	40	PASS	NA	GT	0	1	0	0	0	0	0	0	0	0	0	0	0	0	0	0	0	0	0	0	0	0	0	0	0	0	0	0	0	0	0	0	0	0	0	0	0	0	0	0	0
NC_022541	1026	GCGACCTGCT.TCGCGCCCAG	T	G	40	PASS	NA	GT	0	1	1	1	1	1	1	1	1	0	1	1	1	1	1	0	1	1	1	1	1	1	1	0	1	1	1	1	1	1	1	1	1	1	1	1	1	1	1	1	1
NC_022541	1029	ACCTGCTTCG.CGCCCAGCAA	C	T,G	40	PASS	NA	GT	0	0	0	0	0	0	0	0	0	0	0	0	0	0	0	0	0	0	0	0	0	0	0	0	0	0	0	0	0	0	0	0	0	0	0	0	0	0	0	0	0
NC_022541	1053	CGATCGGCAT.TCCCAATATC	T	C	40	PASS	NA	GT	0	0	1	1	1	1	1	0	0	0	1	0	0	1	0	0	1	0	0	1	1	1	0	0	1	1	1	0	0	0	0	0	0	1	1	1	1	0	0	0	0
NC_022541	1059	GCATTCCCAA.TATCCAGAAG	T	C	40	PASS	NA	GT	0	0	1	1	1	1	1	0	0	0	1	0	0	0	0	0	1	0	0	1	1	1	0	0	1	1	0	0	0	0	0	0	0	1	1	0	1	0	0	0	0
NC_022541	1071	TCCAGAAGAC.CGTGGCCGAT	C	T	40	PASS	NA	GT	0	0	0	0	0	0	0	1	1	0	0	1	1	0	1	0	0	1	1	0	0	0	1	0	0	0	0	1	1	1	1	1	1	0	0	0	0	1	1	1	1
NC_022541	1080	CCGTGGCCGA.TTACTACGGC	T	C	40	PASS	NA	GT	0	0	1	1	1	1	1	0	0	0	1	0	0	1	0	0	1	0	0	1	1	1	0	0	1	1	1	0	0	0	0	0	0	1	1	1	1	0	0	0	0
NC_022541	1090	TTACTACGGC.CTGCAGATGA	C	T	40	PASS	NA	GT	0	0	1	1	1	1	1	1	1	0	1	1	1	1	1	0	1	0	1	1	1	1	1	0	1	1	1	1	1	1	1	1	1	1	1	1	1	1	1	1	1
NC_022541	1095	ACGGCCTGCA.GATGAAGGAT	G	A	40	PASS	NA	GT	0	0	0	0	0	0	0	1	1	0	0	1	1	0	1	0	0	0	1	0	0	0	1	0	0	0	0	1	1	1	1	1	1	0	0	0	0	1	1	1	1
NC_022541	1104	AGATGAAGGA.TCTGCTGTCC	T	C	40	PASS	NA	GT	0	1	0	0	0	0	0	0	0	0	0	0	0	0	0	0	0	0	0	0	0	0	0	0	0	0	0	0	0	0	0	0	0	0	0	0	0	0	0	0	0
NC_022541	1105	GATGAAGGAT.CTGCTGTCCA	C	T	40	PASS	NA	GT	0	0	1	1	1	1	1	0	0	0	1	0	0	1	0	0	1	0	0	1	1	1	0	0	1	1	1	0	0	0	0	0	0	1	1	1	1	0	0	0	0
NC_022541	1132	CACCCGCTCG.CTGGCGCGCC	C	T	40	PASS	NA	GT	0	0	1	1	1	1	1	0	0	0	1	0	0	1	0	0	1	0	0	1	1	1	0	0	1	1	1	0	0	0	0	0	0	1	1	1	1	0	0	0	0
NC_022541	1137	GCTCGCTGGC.GCGCCCGCGG	G	A	40	PASS	NA	GT	0	0	0	0	0	0	0	0	0	0	0	0	0	0	0	0	0	0	0	0	0	0	0	0	0	0	0	0	0	0	0	0	0	0	0	0	0	0	0	0	0
NC_022541	1146	CGCGCCCGCG.GCAGGTGGCG	G	C	40	PASS	NA	GT	0	1	1	1	1	1	1	1	1	0	1	1	1	1	1	0	1	1	1	1	1	1	1	0	1	1	1	1	1	1	1	1	1	1	1	1	1	1	1	1	1
NC_022541	1155	GGCAGGTGGC.GATGGCGCTG	G	A	40	PASS	NA	GT	0	0	0	0	0	0	0	0	0	0	0	0	0	0	0	0	0	0	0	0	0	0	0	0	0	0	0	0	0	0	0	0	0	0	0	0	0	0	0	0	0
NC_022541	1162	GGCGATGGCG.CTGGCCAAGG	C	T	40	PASS	NA	GT	0	1	0	0	0	0	0	0	0	0	0	0	0	0	0	0	0	0	0	0	0	0	0	0	0	0	0	0	0	0	0	0	0	0	0	0	0	0	0	0	0
NC_022541	1173	TGGCCAAGGA.ACTCACCGAG	A	G	40	PASS	NA	GT	0	1	1	1	1	1	1	0	0	0	1	0	0	1	0	0	1	0	0	1	1	1	0	0	1	1	1	0	0	0	0	0	0	1	1	1	1	0	0	0	0
NC_022541	1200	TGCCGGAGAT.CGGCGACGCC	C	T	40	PASS	NA	GT	0	0	1	1	1	1	1	0	0	0	1	0	0	1	0	0	1	0	0	1	1	1	0	0	1	1	1	0	0	0	0	0	0	1	1	1	1	0	0	0	0
NC_022541	1206	AGATCGGCGA.CGCCTTTGCC	C	T	40	PASS	NA	GT	0	0	0	0	0	0	0	1	1	0	0	1	1	0	1	0	0	0	1	0	0	0	1	0	0	0	0	1	1	1	1	1	1	0	0	0	0	1	1	1	1
NC_022541	1209	TCGGCGACGC.CTTTGCCGGC	C	G	40	PASS	NA	GT	0	1	0	0	0	0	0	0	0	0	0	0	0	0	0	0	0	0	0	0	0	0	0	0	0	0	0	0	0	0	0	0	0	0	0	0	0	0	0	0	0
NC_022541	1212	GCGACGCCTT.TGCCGGCCGC	T	C	40	PASS	NA	GT	0	1	1	1	1	1	1	1	1	0	1	1	1	1	1	0	1	1	1	1	1	1	1	0	1	1	1	1	1	1	1	1	1	1	1	1	1	1	1	1	1
NC_022541	1215	ACGCCTTTGC.CGGCCGCGAC	C	T	40	PASS	NA	GT	0	0	0	0	0	0	0	1	1	0	0	1	1	0	1	0	0	1	1	0	0	0	1	0	0	0	0	1	1	1	1	1	1	0	0	0	0	1	1	1	1
NC_022541	1230	GCGACCACAC.CACCGTGCTG	C	T	40	PASS	NA	GT	0	0	0	0	0	0	0	0	0	0	0	0	0	0	0	0	0	0	0	0	0	0	0	0	0	0	0	0	0	0	0	0	0	0	0	0	0	0	0	0	0
NC_022541	1233	ACCACACCAC.CGTGCTGCAT	C	G	40	PASS	NA	GT	0	0	1	1	1	1	1	0	0	0	1	0	0	1	0	0	1	0	0	1	1	1	0	0	1	1	1	0	0	0	0	0	0	1	1	1	1	0	0	0	0
NC_022541	1245	TGCTGCATGC.GTGCCGCCAG	G	C	40	PASS	NA	GT	0	1	1	1	1	1	1	0	0	0	1	0	0	1	0	0	1	0	0	1	1	1	0	0	1	1	1	0	0	0	0	0	0	1	1	1	1	0	0	0	0
NC_022541	1251	ATGCGTGCCG.CCAGATCCGC	C	G,A,T	40	PASS	NA	GT	0	1	2	2	2	2	2	3	3	0	2	3	3	2	3	0	2	3	3	2	2	2	3	0	2	2	2	3	3	3	3	3	3	2	2	2	2	3	3	3	3
NC_022541	1255	GTGCCGCCAG.ATCCGCACGT	A	G	40	PASS	NA	GT	0	0	0	0	0	0	0	0	0	0	0	0	0	0	0	0	0	0	0	0	0	0	0	0	0	0	0	0	0	0	0	0	0	0	0	0	0	0	0	0	0
NC_022541	1257	GCCGCCAGAT.CCGCACGTTG	C	T	40	PASS	NA	GT	0	0	1	1	1	1	1	0	0	0	1	0	0	1	0	0	1	0	0	1	1	1	0	0	1	1	1	0	0	0	0	0	0	1	1	1	1	0	0	0	0
NC_022541	1287	ACGGCAAGCT.CCGTGAGGAC	C	G	40	PASS	NA	GT	0	0	0	0	0	0	0	0	0	0	0	0	0	0	0	0	0	0	0	0	0	0	0	0	0	0	0	0	0	0	0	0	0	0	0	0	0	0	0	0	0
NC_022541	1290	GCAAGCTCCG.TGAGGACTGG	T	C	40	PASS	NA	GT	0	1	1	1	1	1	1	1	1	0	1	1	1	1	1	0	1	1	1	1	1	1	1	0	1	1	1	1	1	1	1	1	1	1	1	1	1	1	1	1	1
NC_022541	1296	TCCGTGAGGA.CTGGGAAAAG	C	T	40	PASS	NA	GT	0	0	1	1	1	1	1	0	0	0	1	0	0	1	0	0	1	0	0	1	1	1	0	0	1	1	1	0	0	0	0	0	0	1	1	1	1	0	0	0	0
NC_022541	1329	TCAGCGAGTA.AGCCCTCGGC	A	G	40	PASS	NA	GT	0	1	1	1	1	1	1	0	0	0	1	0	0	1	0	0	1	0	0	1	1	1	0	0	1	1	1	0	0	0	0	0	0	1	1	1	1	0	0	0	0
NC_022541	1333	CGAGTAAGCC.CTCGGCTGCC	C	A,G	40	PASS	NA	GT	0	1	2	2	2	2	2	1	1	0	2	1	1	2	1	0	2	1	1	2	2	2	1	0	2	2	2	1	1	1	1	1	1	2	2	2	2	1	1	1	1
NC_022541	1335	AGTAAGCCCT.CGGCTGCCAT	C	T	40	PASS	NA	GT	0	0	0	0	0	0	0	0	0	0	0	0	0	0	0	0	0	0	0	0	0	0	0	0	0	0	0	0	0	0	0	0	0	0	0	0	0	0	0	0	0
NC_022541	1348	CTGCCATCGG.CGCCGGGCTG	C	G	40	PASS	NA	GT	0	0	0	0	0	0	0	0	1	0	0	0	0	0	1	0	0	0	0	0	0	0	1	0	0	0	0	1	1	0	0	1	0	0	0	0	0	0	1	1	1
NC_022541	1349	TGCCATCGGC.GCCGGGCTGG	G	T,A	40	PASS	NA	GT	0	0	0	0	0	0	0	0	1	0	0	0	0	0	1	0	0	0	0	0	0	0	1	0	0	0	0	1	1	0	0	1	0	0	0	0	0	0	1	1	1
NC_022541	1352	CATCGGCGCC.GGGCTGGAAA	G	A	40	PASS	NA	GT	0	1	1	1	1	1	1	1	1	0	1	1	1	1	1	0	1	1	1	1	1	1	1	0	1	1	1	1	1	1	1	1	1	1	1	1	1	1	1	1	1
NC_022541	1357	GCGCCGGGCT.GGAAAAAAGC	G	C	40	PASS	NA	GT	0	0	0	0	0	0	0	0	0	0	0	0	0	0	0	0	0	1	0	0	0	0	0	0	0	0	0	0	0	0	0	0	0	0	0	0	0	0	0	0	0
NC_022541	1394	AAATGCGGGA.GAATCTGTGG	G	A	40	PASS	NA	GT	0	0	0	0	0	0	0	0	0	0	0	0	0	0	0	0	0	0	0	0	0	0	0	0	0	0	0	0	0	0	0	0	0	0	0	0	0	0	0	0	0
NC_022541	1412	GGATAACGTT.GCACCGCAGT	G	A	40	PASS	NA	GT	0	0	0	0	0	0	0	0	0	0	0	0	0	0	0	0	0	0	0	0	0	0	0	0	0	0	0	0	0	0	0	0	0	0	0	0	0	0	0	0	0
NC_022541	1413	GATAACGTTG.CACCGCAGTC	C	T	40	PASS	NA	GT	0	0	1	1	1	1	1	0	0	0	1	0	0	1	0	0	1	0	0	1	1	1	0	0	1	1	1	0	0	0	0	0	0	1	1	1	1	0	0	0	0
NC_022541	1414	ATAACGTTGC.ACCGCAGTCC	A	G	40	PASS	NA	GT	0	0	1	1	1	1	1	1	1	0	1	1	1	1	1	0	1	1	1	1	1	1	1	0	1	1	1	1	1	1	1	1	1	1	1	1	1	1	1	1	1
NC_022541	1423	CACCGCAGTC.CGGTTGTAAA	C	G	40	PASS	NA	GT	0	0	0	0	0	0	0	1	1	0	0	1	1	0	1	0	0	1	1	0	0	0	1	0	0	0	0	1	1	1	1	1	1	0	0	0	0	1	1	1	1
NC_022541	1426	CGCAGTCCGG.TTGTAAAACT	T	C	40	PASS	NA	GT	0	1	1	1	1	1	1	1	1	0	1	1	1	1	1	0	1	1	1	1	1	1	1	0	1	1	1	1	1	1	1	1	1	1	1	1	1	1	1	1	1
NC_022541	1427	GCAGTCCGGT.TGTAAAACTA	T	G	40	PASS	NA	GT	0	0	1	1	1	1	1	0	0	0	1	0	0	1	0	0	1	0	0	1	1	1	0	0	1	1	1	0	0	0	0	0	0	1	1	1	1	0	0	0	0
NC_022541	1428	CAGTCCGGTT.GTAAAACTAT	G	C,T	40	PASS	NA	GT	0	0	1	1	1	1	1	1	1	0	1	1	1	1	1	0	1	1	1	1	1	1	1	0	1	1	1	1	1	1	1	1	1	1	1	1	1	1	1	1	1
NC_022541	1429	AGTCCGGTTG.TAAAACTATC	T	G	40	PASS	NA	GT	0	1	1	1	1	1	1	1	1	0	1	1	1	1	1	0	1	1	1	1	1	1	1	0	1	1	1	1	1	1	1	1	1	1	1	1	1	1	1	1	1
NC_022541	1430	GTCCGGTTGT.AAAACTATCC	A	G	40	PASS	NA	GT	0	0	0	0	0	0	0	0	0	0	0	0	0	0	0	0	0	0	0	0	0	0	0	0	0	0	0	0	0	0	0	0	0	0	0	0	0	0	0	0	0
NC_022541	1447	TCCACAGGTT.GTCCGACCAG	G	T,C	40	PASS	NA	GT	0	1	1	1	1	1	1	2	2	0	1	1	1	1	2	0	1	1	2	1	1	1	2	0	1	1	1	2	2	2	2	2	1	1	1	1	1	2	2	2	2
NC_022541	1459	CCGACCAGCT.CAGGCGCACT	C	T	40	PASS	NA	GT	0	0	0	0	0	0	0	0	0	0	0	0	0	0	0	0	0	0	0	0	0	0	0	0	0	0	0	0	0	0	0	0	0	0	0	0	0	0	0	0	0
NC_022541	1464	CAGCTCAGGC.GCACTAGTCC	G	A	40	PASS	NA	GT	0	0	0	0	0	0	0	0	0	0	0	1	1	0	0	0	0	0	0	0	0	0	0	0	0	0	0	0	0	0	0	0	0	0	0	0	0	0	0	0	0
NC_022541	1465	AGCTCAGGCG.CACTAGTCCA	C	T	40	PASS	NA	GT	0	0	0	0	0	0	0	0	0	0	0	0	0	0	0	0	0	0	0	0	0	0	0	0	0	0	0	0	0	0	0	0	0	0	0	0	0	0	0	0	0
NC_022541	1476	ACTAGTCCAA.CGCGTTTCAG	C	T	40	PASS	NA	GT	0	0	1	1	1	1	1	0	0	0	1	0	0	1	0	0	1	0	0	1	1	1	0	0	1	1	1	0	0	0	0	0	0	1	1	1	1	0	0	0	0
NC_022541	1486	CGCGTTTCAG.ATGCTGAAAT	A	G	40	PASS	NA	GT	0	0	1	1	1	1	1	1	1	0	1	1	1	1	1	0	1	1	1	1	1	1	1	0	1	1	1	1	1	1	1	1	1	1	1	1	1	1	1	1	1
NC_022541	1487	GCGTTTCAGA.TGCTGAAATG	T	C	40	PASS	NA	GT	0	0	0	0	0	0	0	0	0	0	0	0	0	0	0	0	0	0	0	0	0	0	0	0	0	0	0	0	0	0	0	0	0	0	0	0	0	0	0	0	0
NC_022541	1495	GATGCTGAAA.TGTCTTTGGA	T	C	40	PASS	NA	GT	0	0	0	0	0	0	0	0	0	0	0	0	0	1	0	0	0	0	0	0	0	0	0	0	0	0	1	0	0	0	0	0	0	0	0	1	0	0	0	0	0
NC_022541	1511	TGGAAACAAA.TAGTTATGGT	T	C	40	PASS	NA	GT	0	0	0	0	0	0	0	1	1	0	0	1	1	0	1	0	0	1	1	0	0	0	1	0	0	0	0	1	1	1	1	1	1	0	0	0	0	1	1	1	1
NC_022541	1517	CAAATAGTTA.TGGTGGTTAT	T	C	40	PASS	NA	GT	0	1	0	0	0	0	0	0	0	0	0	0	0	0	0	0	0	0	0	0	0	0	0	0	0	0	0	0	0	0	0	0	0	0	0	0	0	0	0	0	0
NC_022541	1557	ATCACCACCA.AGCTTTTGAT	A	G	40	PASS	NA	GT	0	0	0	0	0	0	0	0	0	0	0	0	0	0	0	0	0	0	0	0	0	0	0	0	0	0	0	0	0	0	0	0	0	0	0	0	0	0	0	0	0
NC_022541	1576	TTTATTCCAT.ATCTTTTAAA	A	C	40	PASS	NA	GT	0	0	0	0	0	0	0	0	0	0	0	0	0	0	0	0	0	0	0	0	0	0	0	0	0	0	0	0	0	0	0	0	0	0	0	0	0	0	0	0	0
NC_022541	1578	TATTCCATAT.CTTTTAAAGC	C	T	40	PASS	NA	GT	0	1	0	0	0	0	0	0	0	0	0	0	0	0	0	0	0	0	0	0	0	0	0	0	0	0	0	0	0	0	0	0	0	0	0	0	0	0	0	0	0
NC_022541	1592	TAAAGCATAG.GGGCACGGAA	G	A	40	PASS	NA	GT	0	0	0	0	0	0	0	0	0	0	0	0	0	0	0	0	0	1	0	0	0	0	0	0	0	0	0	0	0	0	0	0	0	0	0	0	0	0	0	0	0
NC_022541	1598	ATAGGGGCAC.GGAACCACAT	G	A	40	PASS	NA	GT	0	0	0	0	0	0	0	0	0	0	0	0	0	1	0	0	0	0	0	0	0	0	0	0	0	0	1	0	0	0	0	0	0	0	0	1	0	0	0	0	0
NC_022541	1620	GTTTTACACT.GCAGCGCGAA	G	A	40	PASS	NA	GT	0	0	0	0	0	0	0	0	0	0	0	0	0	0	0	0	0	0	0	0	0	0	0	0	0	0	0	0	0	0	0	0	0	0	0	0	0	0	0	0	0
NC_022541	1632	AGCGCGAAGC.CTTCCTCAAA	C	T	40	PASS	NA	GT	0	0	0	0	0	0	0	0	0	0	0	0	0	0	0	0	0	0	0	0	0	0	0	0	0	0	0	0	0	0	0	0	0	0	0	0	0	0	0	0	0
NC_022541	1659	CACAAGTGGT.CAATGTGGTC	C	G	40	PASS	NA	GT	0	0	0	0	0	0	0	0	0	0	0	0	0	0	0	0	0	0	0	0	0	1	0	0	0	0	0	0	0	0	0	0	0	0	0	0	0	0	0	0	0
NC_022541	1674	TGGTCGAACG.CCGTCAAACC	C	G	40	PASS	NA	GT	0	0	0	0	0	0	0	0	0	0	0	0	0	0	0	0	0	0	0	0	0	0	0	0	0	0	0	0	0	0	0	0	0	0	0	0	0	0	0	0	0
NC_022541	1683	GCCGTCAAAC.CCTGCCCGTC	C	T	40	PASS	NA	GT	0	0	0	0	0	0	0	0	0	0	0	0	0	0	0	0	0	0	0	0	0	0	0	0	0	0	0	0	0	0	0	0	0	0	0	0	0	0	0	0	0
NC_022541	1698	CCGTCCTGGC.CAATTTGCTG	C	T	40	PASS	NA	GT	0	0	0	0	0	0	0	0	0	0	0	1	1	0	0	0	0	0	0	0	0	0	0	0	0	0	0	0	0	0	0	0	0	0	0	0	0	0	0	0	0
NC_022541	1701	TCCTGGCCAA.TTTGCTGGTG	T	C	40	PASS	NA	GT	0	1	1	1	1	1	1	1	1	0	1	1	1	1	1	0	1	1	1	1	1	1	1	0	1	1	1	1	1	1	1	1	1	1	1	1	1	1	1	1	1
NC_022541	1702	CCTGGCCAAT.TTGCTGGTGC	T	C	40	PASS	NA	GT	0	0	0	0	0	0	0	0	0	0	0	0	0	0	0	0	0	0	0	0	0	0	0	0	0	0	0	0	0	0	0	0	0	0	0	0	0	0	0	0	0
NC_022541	1707	CCAATTTGCT.GGTGCAGGTC	G	A	40	PASS	NA	GT	0	0	0	0	0	0	0	0	0	0	0	0	0	0	0	0	0	0	0	0	0	0	0	0	0	0	0	0	0	0	0	0	0	0	0	0	0	0	0	0	0
NC_022541	1710	ATTTGCTGGT.GCAGGTCAAG	G	C,A,T	40	PASS	NA	GT	0	1	2	2	2	2	2	2	2	0	2	2	2	2	2	0	2	2	2	2	2	2	2	0	2	2	2	2	2	2	2	2	2	2	2	2	2	2	2	2	2
NC_022541	1720	GCAGGTCAAG.GATGGACAGG	G	T	40	PASS	NA	GT	0	0	0	0	0	0	0	0	0	0	0	0	0	0	0	0	0	0	0	0	0	0	0	0	0	0	0	0	0	0	0	0	0	0	0	0	0	0	0	0	0
NC_022541	1722	AGGTCAAGGA.TGGACAGGTG	T	C	40	PASS	NA	GT	0	1	0	0	0	0	0	0	0	0	0	0	0	0	0	0	0	0	0	0	0	0	0	0	0	0	0	0	0	0	0	0	0	0	0	0	0	0	0	0	0
NC_022541	1731	ATGGACAGGT.GTCGTTGACC	G	C	40	PASS	NA	GT	0	1	0	0	0	0	0	1	1	0	0	1	1	0	1	0	0	1	1	0	0	0	1	0	0	0	0	1	1	1	1	1	1	0	0	0	0	1	1	1	1
NC_022541	1734	GACAGGTGTC.GTTGACCGGC	G	T	40	PASS	NA	GT	0	0	0	0	0	0	0	0	0	0	0	0	0	0	0	0	0	0	0	0	0	0	0	0	0	0	0	0	0	0	0	0	0	0	0	0	0	0	0	0	0
NC_022541	1743	CGTTGACCGG.CACCGACCTG	C	T	40	PASS	NA	GT	0	0	0	0	0	0	0	0	0	0	0	0	0	0	0	0	0	0	0	0	0	0	0	0	0	0	0	0	0	0	0	0	0	0	0	0	0	0	0	0	0
NC_022541	1784	ACGCTGGTGG.AGGACGCGCA	A	G	40	PASS	NA	GT	0	0	0	0	0	0	0	0	0	0	0	0	0	0	0	0	0	0	0	0	0	0	0	0	1	0	0	0	0	0	0	0	0	0	0	0	0	0	0	0	0
NC_022541	1788	TGGTGGAGGA.CGCGCAGGAC	C	A	40	PASS	NA	GT	0	0	0	0	0	0	0	0	0	0	0	0	0	0	0	0	0	0	0	0	0	0	0	0	0	0	0	0	0	0	0	0	0	0	0	0	0	0	0	0	0
NC_022541	1809	GCGAAACCAC.GATTCCGGCG	G	A	40	PASS	NA	GT	0	0	0	0	0	0	0	0	0	0	0	0	0	0	0	0	0	0	0	0	0	0	0	0	0	0	0	0	0	0	0	0	0	0	0	0	0	0	0	0	0
NC_022541	1818	CGATTCCGGC.GCGCAAGCTG	G	A	40	PASS	NA	GT	0	0	0	0	0	0	0	0	0	0	0	0	0	0	0	0	0	0	0	0	0	0	0	0	0	0	0	0	0	0	0	0	0	0	0	0	0	0	0	0	0
NC_022541	1842	ACATCCTGCG.CGCCCTGCCC	C	T	40	PASS	NA	GT	0	0	0	0	0	0	0	0	0	0	0	0	0	0	0	0	0	0	0	0	0	0	0	0	0	0	0	0	0	0	0	0	0	0	0	0	0	0	0	0	0
NC_022541	1866	GCAGCCGCGT.CACCATTTCG	C	G	40	PASS	NA	GT	0	0	1	1	1	1	1	0	0	0	1	0	0	1	0	0	1	0	0	1	1	1	0	0	1	1	1	0	0	0	0	0	0	1	1	1	1	0	0	0	0
NC_022541	2505	CCGAGCAGGA.AGAGGCTCAG	A	G	40	LCB	NA	GT	0	0	0	0	0	0	0	1	1	0	0	0	0	0	1	0	0	0	1	0	0	0	1	0	0	0	0	1	1	1	1	1	0	0	0	0	0	1	1	1	1
NC_022541	2511	AGGAAGAGGC.TCAGGAAGAG	T	G,C	40	LCB	NA	GT	0	1	1	1	1	1	1	1	1	0	1	1	1	1	1	0	1	1	1	1	1	1	1	0	1	1	1	1	1	1	1	1	1	1	1	1	1	1	1	1	1
NC_022541	2526	AAGAGATCGA.GGCCGATACC	G	A	40	LCB	NA	GT	0	0	0	0	0	0	0	0	0	0	0	0	0	0	0	0	0	0	0	0	0	0	0	0	0	0	0	0	0	0	0	0	0	0	0	0	0	0	0	0	0
NC_022541	2532	TCGAGGCCGA.TACCAAGGTC	T	G	40	LCB	NA	GT	0	0	0	0	0	0	0	0	0	0	0	0	0	0	0	0	0	0	0	0	0	0	0	0	0	0	0	0	0	0	0	0	0	0	0	0	0	0	0	0	0
NC_022541	2547	AGGTCGACGA.CCTGGCCATT	C	T	40	LCB	NA	GT	0	0	1	1	1	1	1	1	1	0	1	1	1	1	1	0	1	1	1	1	1	1	1	0	1	1	1	1	1	1	1	1	1	1	1	1	1	1	1	1	1
NC_022541	2553	ACGACCTGGC.CATTGGCTTC	C	T	40	LCB	NA	GT	0	1	0	0	0	0	0	0	0	0	0	0	0	0	0	0	0	0	0	0	0	0	0	0	0	0	0	0	0	0	0	0	0	0	0	0	0	0	0	0	0
NC_022541	2556	ACCTGGCCAT.TGGCTTCAAC	T	C	40	LCB	NA	GT	0	1	0	0	0	0	0	0	0	0	0	0	0	0	0	0	0	0	0	0	0	0	0	0	0	0	0	0	0	0	0	0	0	0	0	0	0	0	0	0	0
NC_022541	2559	TGGCCATTGG.CTTCAACGTC	C	A	40	LCB	NA	GT	0	0	0	0	0	0	0	0	0	0	0	0	0	0	0	0	0	0	0	0	0	0	0	0	0	0	0	0	0	0	0	0	0	0	0	0	0	0	0	0	0
NC_022541	4980	GAACAAAACA.CCCCGCCAAC	C	T	40	PASS	NA	GT	0	1	0	0	0	0	0	0	0	0	0	0	0	0	0	0	0	0	0	0	0	0	0	0	0	0	0	0	0	0	0	0	0	0	0	0	0	0	0	0	0
NC_022541	5020	CCAGCAAGAT.CACCGTGCTG	C	T	40	PASS	NA	GT	0	0	1	1	1	1	1	0	0	0	1	0	0	0	0	0	1	0	0	1	1	1	0	0	1	1	0	0	0	0	0	0	0	1	1	0	1	0	0	0	0
NC_022541	5041	GTGGCCTGGA.AGCCGTTCGC	A	G	40	PASS	NA	GT	0	1	0	0	0	0	0	0	0	0	0	0	0	0	0	0	0	0	0	0	0	0	0	0	0	0	0	0	0	0	0	0	0	0	0	0	0	0	0	0	0
NC_022541	5047	TGGAAGCCGT.TCGCAAGCGC	T	C	40	PASS	NA	GT	0	1	1	1	1	1	1	1	1	0	1	1	1	1	1	0	1	1	1	1	1	1	1	0	1	1	1	1	1	1	1	1	1	1	1	1	1	1	1	1	1
NC_022541	5056	TTCGCAAGCG.CCCCGGCATG	C	T	40	PASS	NA	GT	0	0	0	0	0	0	0	1	1	0	0	0	0	0	1	0	0	0	1	0	0	0	1	0	0	0	0	1	1	1	1	1	1	0	0	0	0	1	1	1	1
NC_022541	5077	ATATCGGCGA.CGTCCATGAC	C	T	40	PASS	NA	GT	0	0	1	1	1	1	1	0	0	0	1	0	0	1	0	0	1	0	0	1	1	1	0	0	1	1	1	0	0	0	0	0	0	1	1	1	1	0	0	0	0
NC_022541	5083	GCGACGTCCA.TGACGGCACC	T	C	40	PASS	NA	GT	0	0	0	0	0	0	0	0	0	0	0	0	0	0	0	0	0	0	0	0	0	0	0	0	0	0	0	0	0	0	0	0	0	0	0	0	0	0	0	0	0
NC_022541	5092	ATGACGGCAC.CGGCCTGCAT	C	G	40	PASS	NA	GT	0	0	0	0	0	0	0	0	0	0	0	0	0	0	0	0	0	0	0	0	0	0	0	0	0	0	0	0	0	0	0	0	0	0	0	0	0	0	0	0	0
NC_022541	5095	ACGGCACCGG.CCTGCATCAC	C	T	40	PASS	NA	GT	0	0	1	1	1	1	1	0	0	0	1	0	0	1	0	0	1	0	0	1	1	1	0	0	1	1	1	0	0	0	0	0	0	1	1	1	1	0	0	0	0
NC_022541	5134	ACAACTCGGT.CGACGAAGCC	C	G	40	PASS	NA	GT	0	0	1	1	1	1	1	0	0	0	1	0	0	1	0	0	1	0	0	1	1	1	0	0	1	1	1	0	0	0	0	0	0	1	1	1	1	0	0	0	0
NC_022541	5140	CGGTCGACGA.AGCCCTTGCC	A	G	40	PASS	NA	GT	0	0	0	0	0	0	0	0	0	0	0	0	0	0	0	0	0	0	0	0	0	0	0	0	0	0	0	0	0	0	0	0	0	0	0	0	0	0	0	0	0
NC_022541	5146	ACGAAGCCCT.TGCCGGGCAT	T	G,C	40	PASS	NA	GT	0	1	2	2	2	2	2	0	0	0	2	0	0	2	0	0	2	0	0	2	2	2	0	0	2	2	2	0	0	0	0	0	0	2	2	2	2	0	0	0	0
NC_022541	5149	AAGCCCTTGC.CGGGCATGCC	C	T	40	PASS	NA	GT	0	0	1	0	1	1	1	0	0	0	0	0	0	0	0	0	0	0	0	0	0	1	0	0	0	0	0	0	0	0	0	0	0	1	0	0	0	0	0	0	0
NC_022541	5158	CCGGGCATGC.CGACGACATC	C	G	40	PASS	NA	GT	0	1	1	1	1	1	1	0	0	0	1	0	0	1	0	0	1	0	0	1	1	1	0	0	1	1	1	0	0	0	0	0	0	1	1	1	1	0	0	0	0
NC_022541	5173	ACATCGTGGT.AAAGATCATG	A	G	40	PASS	NA	GT	0	1	1	1	1	1	1	0	0	0	1	0	0	1	0	0	1	0	0	1	1	1	0	0	1	1	1	0	0	0	0	0	0	1	1	1	1	0	0	0	0
NC_022541	5176	TCGTGGTAAA.GATCATGGCC	G	A	40	PASS	NA	GT	0	0	0	0	0	0	0	1	1	0	0	1	1	0	1	0	0	1	1	0	0	0	1	0	0	0	0	1	1	1	1	1	1	0	0	0	0	1	1	1	1
NC_022541	5180	GGTAAAGATC.ATGGCCGATG	A	C	40	PASS	NA	GT	0	1	1	1	1	1	1	1	1	0	1	1	1	1	1	0	1	1	1	1	1	1	1	0	1	1	1	1	1	1	1	1	1	1	1	1	1	1	1	1	1
NC_022541	5185	AGATCATGGC.CGATGGCTCG	C	T	40	PASS	NA	GT	0	0	0	0	0	0	0	0	0	0	0	0	0	0	0	0	0	1	0	0	0	0	0	0	0	0	0	0	0	0	0	0	0	0	0	0	0	0	0	0	0
NC_022541	5188	TCATGGCCGA.TGGCTCGGTG	T	C	40	PASS	NA	GT	0	0	1	1	1	1	1	0	0	0	1	0	0	0	0	0	1	0	0	1	1	1	0	0	1	1	0	0	0	0	0	0	0	1	1	0	1	0	0	0	0
NC_022541	5200	GCTCGGTGGC.AGTTTCCGAC	A	G,C	40	PASS	NA	GT	0	1	1	1	1	1	1	1	1	0	1	1	1	1	1	0	1	1	1	1	1	1	1	0	1	1	1	1	1	1	1	1	1	1	1	1	1	1	1	1	1
NC_022541	5203	CGGTGGCAGT.TTCCGACAAC	T	C	40	PASS	NA	GT	0	1	1	1	1	1	1	1	1	0	1	1	1	1	1	0	1	1	1	1	1	1	1	0	1	1	1	1	1	1	1	1	1	1	1	1	1	1	1	1	1
NC_022541	5221	ACGGGCGCGG.CGTGCCGGTC	C	T	40	PASS	NA	GT	0	0	0	0	0	0	0	0	0	0	0	0	0	0	0	0	0	0	0	0	0	0	0	0	0	0	0	0	0	0	0	0	0	0	0	0	0	0	0	0	0
NC_022541	5224	GGCGCGGCGT.GCCGGTCGAC	G	A	40	PASS	NA	GT	0	0	0	0	0	0	0	0	0	0	0	0	0	0	0	0	0	0	0	0	0	0	0	0	0	0	0	0	0	0	0	0	0	0	0	0	0	0	0	0	0
NC_022541	5236	CGGTCGACAT.CCACAAGGAA	C	T	40	PASS	NA	GT	0	0	0	1	0	0	0	0	0	0	1	0	0	0	0	0	1	0	0	1	1	0	0	0	1	1	0	0	0	0	0	0	0	0	1	0	1	0	0	0	0
NC_022541	5254	AAGAAGGCGT.GTCGGCGGCC	G	C,A	40	PASS	NA	GT	0	1	1	1	1	1	1	0	0	0	1	0	0	1	0	0	1	0	0	1	1	1	0	0	1	1	1	0	0	0	0	0	0	1	1	1	1	0	0	0	0
NC_022541	5284	TCACCGTGCT.CCATGCCGGC	C	G	40	PASS	NA	GT	0	1	1	1	1	1	1	0	0	0	1	0	0	1	0	0	1	0	0	1	1	1	0	0	1	1	1	0	0	0	0	0	0	1	1	1	1	0	0	0	0
NC_022541	5287	CCGTGCTCCA.TGCCGGCGGC	T	C	40	PASS	NA	GT	0	1	1	1	1	1	1	1	1	0	1	1	1	1	1	0	1	1	1	1	1	1	1	0	1	1	1	1	1	1	1	1	1	1	1	1	1	1	1	1	1
NC_022541	5290	TGCTCCATGC.CGGCGGCAAG	C	T	40	PASS	NA	GT	0	0	0	0	0	0	0	0	0	0	0	0	0	0	0	0	0	0	0	0	0	0	0	0	0	0	0	0	0	0	0	0	0	0	0	0	0	0	0	0	0
NC_022541	5323	GCTACAAGGT.CTCTGGCGGC	C	G	40	PASS	NA	GT	0	0	1	1	1	1	1	0	0	0	1	0	0	1	0	0	1	0	0	1	1	1	0	0	1	1	1	0	0	0	0	0	0	1	1	1	1	0	0	0	0
NC_022541	5326	ACAAGGTCTC.TGGCGGCCTG	T	C	40	PASS	NA	GT	0	1	1	1	1	1	1	1	1	0	1	1	1	1	1	0	1	1	1	1	1	1	1	0	1	1	1	1	1	1	1	1	1	1	1	1	1	1	1	1	1
NC_022541	5329	AGGTCTCTGG.CGGCCTGCAC	C	T	40	PASS	NA	GT	0	0	1	1	1	1	1	0	0	0	1	0	0	1	0	0	1	1	0	1	1	1	0	0	1	1	1	0	0	0	0	0	0	1	1	1	1	0	0	0	0
NC_022541	5338	GCGGCCTGCA.CGGCGTTGGC	C	T	40	PASS	NA	GT	0	0	0	0	0	0	0	0	0	0	0	0	0	0	0	0	0	0	0	0	0	0	0	0	0	0	0	0	0	0	0	0	0	0	0	0	0	0	0	0	0
NC_022541	5344	TGCACGGCGT.TGGCGTCTCG	T	G,A	40	PASS	NA	GT	0	1	1	1	1	1	1	0	0	0	1	0	0	1	0	0	1	0	0	1	1	1	0	0	1	1	1	0	0	0	0	0	0	1	1	1	1	0	0	0	0
NC_022541	5350	GCGTTGGCGT.CTCGGTGGTC	C	T	40	PASS	NA	GT	0	0	1	1	1	1	1	0	0	0	1	0	0	1	0	0	1	0	0	1	1	1	0	0	1	1	1	0	0	0	0	0	0	1	1	1	1	0	0	0	0
NC_022541	5359	TCTCGGTGGT.CAACGCGTTG	C	T	40	PASS	NA	GT	0	0	0	0	0	0	0	0	0	0	0	0	0	1	0	0	0	0	0	0	0	0	0	0	0	0	1	0	0	0	0	0	0	0	0	1	0	0	0	0	0
NC_022541	5362	CGGTGGTCAA.CGCGTTGTCC	C	T	40	PASS	NA	GT	0	1	0	0	0	0	0	0	0	0	0	0	0	0	0	0	0	0	0	0	0	0	0	0	0	0	0	0	0	0	0	0	0	0	0	0	0	0	0	0	0
NC_022541	5365	TGGTCAACGC.GTTGTCCGAG	G	A	40	PASS	NA	GT	0	1	0	0	0	0	0	0	0	0	0	0	0	0	0	0	0	0	0	0	0	0	0	0	0	0	0	0	0	0	0	0	0	0	0	0	0	0	0	0	0
NC_022541	5366	GGTCAACGCG.TTGTCCGAGC	T	C	40	PASS	NA	GT	0	0	0	0	0	0	0	0	0	0	0	0	0	0	0	0	0	0	0	0	0	0	0	0	0	0	0	0	0	0	0	0	0	0	0	0	0	0	0	0	0
NC_022541	5371	ACGCGTTGTC.CGAGCACCTG	C	A	40	PASS	NA	GT	0	0	0	0	0	0	0	1	1	0	0	1	1	0	1	0	0	0	1	0	0	0	1	0	0	0	0	1	1	1	1	1	1	0	0	0	0	1	1	1	1
NC_022541	5378	GTCCGAGCAC.CTGTGGCTGG	C	T	40	PASS	NA	GT	0	1	1	1	1	1	1	0	0	0	1	0	0	1	0	0	1	0	0	1	1	1	0	0	1	1	1	0	0	0	0	0	0	1	1	1	1	0	0	0	0
NC_022541	5401	TCTGGCGCGA.CGGCTTCCAC	C	T	40	PASS	NA	GT	0	0	0	0	0	0	0	0	0	0	0	0	0	0	0	0	0	0	0	0	0	0	0	0	0	0	0	0	0	0	0	0	0	0	0	0	0	0	0	0	0
NC_022541	5404	GGCGCGACGG.CTTCCACTAC	C	T	40	PASS	NA	GT	0	0	1	1	1	1	1	0	0	0	1	0	0	1	0	0	1	0	0	1	1	1	0	0	1	1	1	0	0	0	0	0	0	1	1	1	1	0	0	0	0
NC_022541	5419	ACTACCAGCA.GGAATACGCG	G	A	40	PASS	NA	GT	0	0	0	0	0	0	0	0	0	0	0	0	0	0	0	0	0	0	0	0	0	0	0	0	0	0	0	0	0	0	0	0	0	0	0	0	0	0	0	0	0
NC_022541	5422	ACCAGCAGGA.ATACGCGCTG	A	G	40	PASS	NA	GT	0	1	0	0	0	0	0	0	0	0	0	0	0	0	0	0	0	0	0	0	0	0	0	0	0	0	0	0	0	0	0	0	0	0	0	0	0	0	0	0	0
NC_022541	5434	ACGCGCTGGG.CGAGCCGCAG	C	T	40	PASS	NA	GT	0	1	0	0	0	0	0	0	0	0	0	0	0	0	0	0	0	0	0	0	0	0	0	0	0	0	0	0	0	0	0	0	0	0	0	0	0	0	0	0	0
NC_022541	5437	CGCTGGGCGA.GCCGCAGTAC	G	A	40	PASS	NA	GT	0	0	0	0	0	0	0	0	0	0	0	0	0	0	0	0	0	0	0	0	0	0	0	0	0	0	0	0	0	0	0	0	0	0	0	0	0	0	0	0	0
NC_022541	5443	GCGAGCCGCA.GTACCCGCTC	G	A	40	PASS	NA	GT	0	0	1	1	1	1	1	0	0	0	1	0	0	1	0	0	1	0	0	1	1	1	0	0	1	1	1	0	0	0	0	0	0	1	1	1	1	0	0	0	0
NC_022541	5454	TACCCGCTCA.AGCAGCTGGA	A	G	40	PASS	NA	GT	0	0	0	0	0	0	0	0	0	0	0	0	1	0	0	0	0	0	0	0	0	0	0	0	0	0	0	0	0	0	0	0	0	0	0	0	0	0	0	0	0
NC_022541	5482	CCAAGCGCGG.TACCACGCTG	T	C	40	PASS	NA	GT	0	1	1	1	1	1	1	0	0	0	1	0	0	1	0	0	1	0	0	1	1	1	0	0	1	1	1	0	0	0	0	0	0	1	1	1	1	0	0	0	0
NC_022541	5507	CAAGCCGTCC.GTGGCCATCT	G	A	40	PASS	NA	GT	0	0	0	0	0	0	0	0	0	0	0	0	1	0	0	0	0	0	0	0	0	0	0	0	0	0	0	0	0	0	0	0	0	0	0	0	0	0	0	0	0
NC_022541	5524	TCTTCAGCGA.CGTCGAGTTC	C	T	40	PASS	NA	GT	0	0	0	0	0	0	0	0	0	0	0	0	0	0	0	0	0	0	0	0	0	0	0	0	0	0	0	0	0	0	0	0	0	0	0	0	0	0	0	0	0
NC_022541	5554	TCCTGGCGCG.GCGCCTGCGC	G	A,T	40	PASS	NA	GT	0	0	1	1	1	1	1	0	0	0	1	0	0	1	0	0	1	0	0	1	1	1	0	0	1	1	1	0	0	0	0	0	0	1	1	1	1	0	0	0	0
NC_022541	5576	GCTGTCCTTC.CTCAATTCCG	C	T	40	PASS	NA	GT	0	0	0	0	0	0	0	0	0	0	0	0	0	0	0	0	0	0	0	0	0	0	0	0	0	0	0	0	0	0	0	0	0	0	0	0	0	0	0	0	0
NC_022541	5578	TGTCCTTCCT.CAATTCCGGC	C	G	40	PASS	NA	GT	0	0	1	1	1	1	1	0	0	0	1	0	0	1	0	0	1	0	0	1	1	1	0	0	1	1	1	0	0	0	0	0	0	1	1	1	1	0	0	0	0
NC_022541	5584	TCCTCAATTC.CGGCGTCAAG	C	T	40	PASS	NA	GT	0	0	0	0	0	0	0	1	1	0	0	1	1	0	1	0	0	1	1	0	0	0	1	0	0	0	0	1	1	1	1	1	1	0	0	0	0	1	1	1	1
NC_022541	5599	TCAAGATCAC.CTTGATCGAC	C	G	40	PASS	NA	GT	0	0	0	0	0	0	0	0	0	0	0	0	0	0	0	0	0	1	0	0	0	0	0	0	0	0	0	0	0	0	0	0	0	0	0	0	0	0	0	0	0
NC_022541	5600	CAAGATCACC.TTGATCGACG	T	C	40	PASS	NA	GT	0	0	0	0	0	0	0	0	0	0	0	0	0	0	0	0	0	0	0	0	0	0	0	0	0	0	0	0	0	0	0	0	0	0	0	0	0	0	0	0	0
NC_022541	5614	TCGACGAGCG.CGGCGAAGGC	C	G,A	40	PASS	NA	GT	0	0	1	1	1	1	1	0	0	0	1	0	0	2	0	0	1	0	0	1	1	1	0	0	1	1	2	0	0	0	0	0	0	1	1	2	1	0	0	0	0
NC_022541	5632	GCCGTCGCGA.CGATTTCCAT	C	T	40	PASS	NA	GT	0	0	1	1	1	1	1	0	0	0	1	0	0	1	0	0	1	0	0	1	1	1	0	0	1	1	1	0	0	0	0	0	0	1	1	1	1	0	0	0	0
NC_022541	5641	ACGATTTCCA.TTACGAAGGC	T	C	40	PASS	NA	GT	0	0	0	0	0	0	0	0	0	0	0	0	0	0	0	0	0	0	0	0	0	0	0	0	0	0	0	0	0	0	0	0	0	0	0	0	0	0	0	0	0
NC_022541	5647	TCCATTACGA.AGGCGGTATC	A	G	40	PASS	NA	GT	0	0	0	0	0	0	0	0	0	0	0	0	0	0	0	0	0	0	0	0	0	0	0	0	0	0	0	0	0	0	0	0	0	0	0	0	0	0	0	0	0
NC_022541	5650	ATTACGAAGG.CGGTATCCGT	C	T	40	PASS	NA	GT	0	0	0	0	0	0	0	0	0	0	0	0	0	0	0	0	0	0	0	0	0	0	0	0	0	0	0	0	0	0	0	0	0	0	0	0	0	0	0	0	0
NC_022541	5653	ACGAAGGCGG.TATCCGTAGC	T	C	40	PASS	NA	GT	0	1	1	1	1	1	1	1	1	0	1	1	1	1	1	0	1	1	1	1	1	1	1	0	1	1	1	1	1	1	1	1	1	1	1	1	1	1	1	1	1
NC_022541	5659	GCGGTATCCG.TAGCTTCGTG	T	C	40	PASS	NA	GT	0	1	1	1	1	1	1	1	1	0	1	1	1	1	1	0	1	1	1	1	1	1	1	0	1	1	1	1	1	1	1	1	1	1	1	1	1	1	1	1	1
NC_022541	5675	CGTGGAGCAT.TTGGCGCAGC	T	C	40	PASS	NA	GT	0	1	1	1	1	1	1	1	1	0	1	1	1	1	1	0	1	1	1	1	1	1	1	0	1	1	1	1	1	1	1	1	1	1	1	1	1	1	1	1	1
NC_022541	5684	TTTGGCGCAG.CTGAAGTCGC	C	T	40	PASS	NA	GT	0	1	0	0	0	0	0	0	0	0	0	0	0	0	0	0	0	0	0	0	0	0	0	0	0	0	0	0	0	0	0	0	0	0	0	0	0	0	0	0	0
NC_022541	5692	AGCTGAAGTC.GCCGCTGCAC	G	A	40	PASS	NA	GT	0	0	0	0	0	0	0	0	0	0	0	0	0	0	0	0	0	0	0	0	0	0	0	0	0	0	0	0	0	0	0	0	0	0	0	0	0	0	0	0	0
NC_022541	5695	TGAAGTCGCC.GCTGCACCCG	G	A	40	PASS	NA	GT	0	0	1	1	1	1	1	0	0	0	1	0	0	1	0	0	1	0	0	1	1	1	0	0	1	1	1	0	0	0	0	0	0	1	1	1	1	0	0	0	0
NC_022541	5701	CGCCGCTGCA.CCCGAATGTG	C	T	40	PASS	NA	GT	0	0	0	0	0	0	0	0	0	0	0	0	0	0	0	0	0	0	0	0	0	0	0	0	0	0	0	0	0	0	0	0	0	0	0	0	0	0	0	0	0
NC_022541	5702	GCCGCTGCAC.CCGAATGTGA	C	G	40	PASS	NA	GT	0	0	0	0	0	0	0	0	0	0	0	0	0	0	0	0	0	0	0	0	0	0	0	0	0	0	0	0	0	0	0	0	0	0	0	0	0	0	0	0	0
NC_022541	5713	CGAATGTGAT.CTCGGTGACC	C	T	40	PASS	NA	GT	0	0	0	0	0	0	0	0	0	0	0	0	0	0	0	0	0	1	0	0	0	0	0	0	0	0	0	0	0	0	0	0	0	0	0	0	0	0	0	0	0
NC_022541	5908	CCAAGCAGGC.CAAGGTCGCG	C	T	40	PASS	NA	GT	0	0	0	0	0	0	0	0	0	0	0	0	0	0	0	0	0	0	0	0	0	0	0	0	0	0	0	0	0	0	0	0	0	0	0	0	0	0	0	0	0
NC_022541	5920	AGGTCGCGCT.GACCGGCGAC	G	C	40	PASS	NA	GT	0	0	1	1	1	1	1	0	0	0	1	0	0	1	0	0	1	0	0	1	1	1	0	0	1	1	1	0	0	0	0	0	0	1	1	1	1	0	0	0	0
NC_022541	5926	CGCTGACCGG.CGACGACATG	C	T	40	PASS	NA	GT	0	0	0	0	0	0	0	0	0	0	0	0	0	0	0	0	0	0	0	0	0	0	0	0	0	0	0	0	0	0	0	0	0	0	0	0	0	0	0	0	0
NC_022541	5929	TGACCGGCGA.CGACATGCGC	C	T	40	PASS	NA	GT	0	0	0	0	0	0	0	0	0	0	0	0	0	0	0	0	0	0	0	0	0	0	0	0	0	0	0	0	0	0	0	0	0	0	0	0	0	0	0	0	0
NC_022541	5944	TGCGCGAAGG.GATGATCGCG	G	C	40	PASS	NA	GT	0	1	1	1	1	1	1	1	1	0	1	1	1	1	1	0	1	1	1	1	1	1	1	0	1	1	1	1	1	1	1	1	1	1	1	1	1	1	1	1	1
NC_022541	5959	TCGCGGTGCT.TTCGGTCAAG	T	C	40	PASS	NA	GT	0	0	1	1	1	1	1	0	0	0	1	0	0	1	0	0	1	0	0	1	1	1	0	0	1	1	1	0	0	0	0	0	0	1	1	1	1	0	0	0	0
NC_022541	5989	CCAGCTTCTC.ATCGCAGACC	A	T	40	PASS	NA	GT	0	1	1	1	1	1	1	1	1	0	1	1	1	1	1	0	1	1	1	1	1	1	1	0	1	1	1	1	1	1	1	1	1	1	1	1	1	1	1	1	1
NC_022541	6008	CAAGGAAAAG.CTGGTCAGTT	C	T	40	PASS	NA	GT	0	0	1	1	1	1	1	0	0	0	1	0	0	1	0	0	1	0	0	1	1	1	0	0	1	1	1	0	0	0	0	0	0	1	1	1	1	0	0	0	0
NC_022541	6016	AGCTGGTCAG.TTCGGATGTA	T	C	40	PASS	NA	GT	0	1	1	1	1	1	1	0	0	0	1	0	0	1	0	0	1	0	0	1	1	1	0	0	1	1	1	0	0	0	0	0	0	1	1	1	1	0	0	0	0
NC_022541	6022	TCAGTTCGGA.TGTACGCCCG	T	C	40	PASS	NA	GT	0	0	1	1	1	1	1	0	0	0	1	0	0	1	0	0	1	0	0	1	1	1	0	0	1	1	1	0	0	0	0	0	0	1	1	1	1	0	0	0	0
NC_022541	6025	GTTCGGATGT.ACGCCCGGCG	A	G	40	PASS	NA	GT	0	1	1	1	1	1	1	1	1	0	1	1	1	1	1	0	1	1	1	1	1	1	1	0	1	1	1	1	1	1	1	1	1	1	1	1	1	1	1	1	1
NC_022541	6031	ATGTACGCCC.GGCGGTGGAA	G	A	40	PASS	NA	GT	0	0	0	0	0	0	0	0	0	0	0	1	1	0	0	0	0	0	0	0	0	0	0	0	0	0	0	0	0	0	0	0	0	0	0	0	0	0	0	0	0
NC_022541	6034	TACGCCCGGC.GGTGGAAAAC	G	A,C	40	PASS	NA	GT	0	1	2	2	2	2	2	0	0	0	2	0	0	2	0	0	2	0	0	2	2	2	0	0	2	2	2	0	0	0	0	0	0	2	2	2	2	0	0	0	0
NC_022541	6040	CGGCGGTGGA.AAACGCCTTC	A	G	40	PASS	NA	GT	0	1	1	1	1	1	1	0	0	0	1	0	0	1	0	0	1	0	0	1	1	1	0	0	1	1	1	0	0	0	0	0	0	1	1	1	1	0	0	0	0
NC_022541	6049	AAAACGCCTT.CGGTGCGCGT	C	T	40	PASS	NA	GT	0	1	0	0	0	0	0	0	0	0	0	0	0	0	0	0	0	0	0	0	0	0	0	0	0	0	0	0	0	0	0	0	0	0	0	0	0	0	0	0	0
NC_022541	6052	ACGCCTTCGG.TGCGCGTCTG	T	C	40	PASS	NA	GT	0	0	1	1	1	1	1	0	0	0	1	0	0	1	0	0	1	0	0	1	1	1	0	0	1	1	1	0	0	0	0	0	0	1	1	1	1	0	0	0	0
NC_022541	6058	TCGGTGCGCG.TCTGCAGGAG	T	C	40	PASS	NA	GT	0	1	1	1	1	1	1	1	1	0	1	1	1	1	1	0	1	1	1	1	1	1	1	0	1	1	1	1	1	1	1	1	1	1	1	1	1	1	1	1	1
NC_022541	6061	GTGCGCGTCT.GCAGGAGTTC	G	T	40	PASS	NA	GT	0	0	0	0	0	0	0	0	0	0	0	0	0	0	0	0	0	0	0	0	0	0	0	0	0	0	0	0	0	0	0	0	0	0	0	0	0	0	0	0	0
NC_022541	6067	GTCTGCAGGA.GTTCCTGCAG	G	A	40	PASS	NA	GT	0	0	0	0	0	0	0	0	0	0	0	0	0	0	0	0	0	0	0	0	0	0	0	0	0	0	0	0	0	0	0	0	0	0	0	0	0	0	0	0	0
NC_022541	6274	GTGACTCGGC.AGGTGGCTCG	A	G	40	PASS	NA	GT	0	1	0	0	0	0	0	0	0	0	0	0	0	0	0	0	0	0	0	0	0	0	0	0	0	0	0	0	0	0	0	0	0	0	0	0	0	0	0	0	0
NC_022541	6277	ACTCGGCAGG.TGGCTCGGCC	T	C	40	PASS	NA	GT	0	1	0	0	0	0	0	0	0	0	0	0	0	0	0	0	0	0	0	0	0	0	0	0	0	0	0	0	0	0	0	0	0	0	0	0	0	0	0	0	0
NC_022541	6280	CGGCAGGTGG.CTCGGCCAAG	C	T	40	PASS	NA	GT	0	0	0	0	0	0	0	0	0	0	0	0	0	0	0	0	0	0	0	0	0	0	0	0	0	0	0	0	0	0	0	0	0	0	0	0	0	0	0	0	0
NC_022541	6292	CGGCCAAGCA.GGGTCGCAAC	G	A	40	PASS	NA	GT	0	0	0	0	0	0	0	0	0	0	0	0	0	0	0	0	0	0	0	0	0	0	0	0	0	0	0	0	0	0	0	0	0	0	0	0	0	0	0	0	0
NC_022541	6295	CCAAGCAGGG.TCGCAACCGC	T	A,C	40	PASS	NA	GT	0	1	0	0	0	0	0	2	2	0	0	2	2	0	2	0	0	2	2	0	0	0	2	0	0	0	0	2	2	2	2	2	2	0	0	0	0	2	2	2	2
NC_022541	6316	AGAACCAGGC.GGTGCTGCCG	G	C	40	PASS	NA	GT	0	1	0	0	0	0	0	0	0	0	0	0	0	0	0	0	0	0	0	0	0	0	0	0	0	0	0	0	0	0	0	0	0	0	0	0	0	0	0	0	0
NC_022541	6319	ACCAGGCGGT.GCTGCCGCTG	G	A	40	PASS	NA	GT	0	0	1	1	1	1	1	0	0	0	1	0	0	1	0	0	1	0	0	1	1	1	0	0	1	1	1	0	0	0	0	0	0	1	1	1	1	0	0	0	0
NC_022541	6320	CCAGGCGGTG.CTGCCGCTGC	C	T	40	PASS	NA	GT	0	0	0	0	0	0	0	0	0	0	0	0	0	0	0	0	0	0	0	0	0	0	0	0	0	0	0	0	0	0	0	0	0	0	0	0	0	0	0	0	0
NC_022541	6346	AGATCCTCAA.CGTGGAACGC	C	T	40	PASS	NA	GT	0	1	1	1	1	1	1	0	0	0	1	1	1	1	0	0	1	0	0	1	1	1	0	0	1	1	1	0	0	0	0	0	1	1	1	1	1	0	0	0	0
NC_022541	6349	TCCTCAACGT.GGAACGCGCC	G	C	40	PASS	NA	GT	0	1	0	0	0	0	0	0	0	0	0	0	0	0	0	0	0	0	0	0	0	0	0	0	0	0	0	0	0	0	0	0	0	0	0	0	0	0	0	0	0
NC_022541	6355	ACGTGGAACG.CGCCCGCTTC	C	T	40	PASS	NA	GT	0	1	1	1	1	1	1	0	0	0	1	0	0	1	0	0	1	0	0	1	1	1	0	0	1	1	1	0	0	0	0	0	0	1	1	1	1	0	0	0	0
NC_022541	6358	TGGAACGCGC.CCGCTTCGAC	C	A	40	PASS	NA	GT	0	0	0	0	0	0	0	0	0	0	0	1	1	0	0	0	0	0	0	0	0	0	0	0	0	0	0	0	0	0	0	0	0	0	0	0	0	0	0	0	0
NC_022541	6377	CCGCATGCTG.TCCTCCGACC	T	G	40	PASS	NA	GT	0	1	1	1	1	1	1	1	1	0	1	1	1	1	1	0	1	1	1	1	1	1	1	0	1	1	1	1	1	1	1	1	1	1	1	1	1	1	1	1	1
NC_022541	6406	CGCTGATCAC.AGCGCTCGGT	A	T,C	40	PASS	NA	GT	0	1	2	2	2	2	2	2	2	0	2	2	2	2	2	0	2	2	2	2	2	2	2	0	2	2	2	2	2	2	2	2	2	2	2	2	2	2	2	2	2
NC_022541	6412	TCACAGCGCT.CGGTACCGGC	C	G	40	PASS	NA	GT	0	1	1	1	1	1	1	0	0	0	1	0	0	1	0	0	1	0	0	1	1	1	0	0	1	1	1	0	0	0	0	0	0	1	1	1	1	0	0	0	0
NC_022541	6415	CAGCGCTCGG.TACCGGCATC	T	C	40	PASS	NA	GT	0	1	1	1	1	1	1	0	0	0	1	0	0	1	0	0	1	0	0	1	1	1	0	0	1	1	1	0	0	0	0	0	0	1	1	1	1	0	0	0	0
NC_022541	6427	CCGGCATCGG.CCGCGACGAG	C	T	40	PASS	NA	GT	0	1	0	0	0	0	0	0	0	0	0	0	0	0	0	0	0	0	0	0	0	0	0	0	0	0	0	0	0	0	0	0	0	0	0	0	0	0	0	0	0
NC_022541	6436	GCCGCGACGA.GTACAACCCG	G	A	40	PASS	NA	GT	0	0	0	0	0	0	0	0	0	0	0	0	0	0	0	0	0	0	0	0	0	0	0	0	0	0	0	0	0	0	0	0	0	0	0	0	0	0	0	0	0
NC_022541	6610	TCAAGCAGGG.CAAGAGCGAG	C	T	40	LCB	NA	GT	0	0	0	0	0	0	0	0	0	0	0	0	0	0	0	0	0	0	0	0	0	0	0	0	0	0	0	0	0	0	0	0	0	0	0	0	0	0	0	0	0
NC_022541	6620	CAAGAGCGAG.TTGTACCTGA	T	C	40	LCB	NA	GT	0	1	1	1	1	1	1	1	1	0	1	1	1	1	1	0	1	1	1	1	1	1	1	0	1	1	1	1	1	1	1	1	1	1	1	1	1	1	1	1	1
NC_022541	6625	GCGAGTTGTA.CCTGAAGGAC	C	T	40	LCB	NA	GT	0	1	1	1	1	1	1	1	1	0	1	1	1	1	1	0	1	1	1	1	1	1	1	0	1	1	1	1	1	1	1	1	1	1	1	1	1	1	1	1	1
NC_022541	6637	TGAAGGACGA.CGCGGCGCTC	C	G	40	LCB	NA	GT	0	0	0	0	0	0	0	0	0	0	0	0	0	0	0	1	0	0	0	0	0	0	0	0	0	0	0	0	0	0	0	0	0	0	0	0	0	0	0	0	0
NC_022541	6643	ACGACGCGGC.GCTCAACGCC	G	A	40	LCB	NA	GT	0	0	1	1	1	1	1	0	0	0	1	0	0	1	0	0	1	0	0	1	1	1	0	0	1	1	1	0	0	0	0	0	0	1	1	1	1	0	0	0	0
NC_022541	6649	CGGCGCTCAA.CGCCTACCTG	C	T	40	LCB	NA	GT	0	0	0	0	0	0	0	0	0	0	0	0	0	0	0	0	0	0	0	0	0	0	0	0	0	0	0	0	0	0	0	0	0	0	0	0	0	0	0	0	0
NC_022541	6652	CGCTCAACGC.CTACCTGGCC	C	G	40	LCB	NA	GT	0	0	0	0	0	0	0	0	0	0	0	0	0	0	0	0	0	0	0	0	0	0	0	0	0	0	0	0	0	0	0	0	0	0	0	0	0	0	0	0	0
NC_022541	6655	TCAACGCCTA.CCTGGCCAGC	C	T	40	LCB	NA	GT	0	0	0	0	0	0	0	0	0	0	0	0	0	0	0	0	0	0	0	0	0	0	0	0	0	0	0	0	0	0	0	0	0	0	0	0	0	0	0	0	0
NC_022541	6656	CAACGCCTAC.CTGGCCAGCA	C	T	40	LCB	NA	GT	0	0	0	0	0	0	0	0	0	0	0	0	0	0	0	0	0	0	0	0	0	0	0	0	0	0	0	0	0	0	0	0	0	0	0	0	0	0	0	0	0
NC_022541	6661	CCTACCTGGC.CAGCAATGCG	C	T	40	LCB	NA	GT	0	0	0	0	0	0	0	0	0	0	0	0	0	0	0	0	0	0	0	0	0	0	0	0	0	0	0	0	0	0	0	0	0	0	0	0	0	0	0	0	0
NC_022541	6664	ACCTGGCCAG.CAATGCGGTC	C	T	40	LCB	NA	GT	0	0	0	0	0	0	0	0	0	0	0	0	0	0	0	0	0	0	0	0	0	0	0	0	0	0	0	0	0	0	0	0	0	0	0	0	0	0	0	0	0
NC_022541	6676	ATGCGGTCGA.AGGTGCGGCG	A	G	40	LCB	NA	GT	0	1	0	0	0	0	0	0	0	0	0	0	0	0	0	0	0	0	0	0	0	0	0	0	0	0	0	0	0	0	0	0	0	0	0	0	0	0	0	0	0
NC_022541	6679	CGGTCGAAGG.TGCGGCGCTG	T	C	40	LCB	NA	GT	0	0	0	0	0	0	0	0	0	0	0	0	0	0	0	0	0	0	0	0	0	0	0	0	0	0	0	0	0	0	0	0	0	0	0	0	0	0	0	0	0
NC_022541	6680	GGTCGAAGGT.GCGGCGCTGA	G	T	40	LCB	NA	GT	0	0	0	0	0	0	0	0	0	0	0	0	0	0	0	0	0	0	0	0	0	0	0	0	0	0	0	0	0	0	1	0	0	0	0	0	0	0	0	0	0
NC_022541	6706	CCACCGACGA.GCCACCGATC	G	A	40	LCB	NA	GT	0	1	0	0	0	0	0	0	0	0	0	0	0	0	0	0	0	0	0	0	0	0	0	0	0	0	0	0	0	0	0	0	0	0	0	0	0	0	0	0	0
NC_022541	6709	CCGACGAGCC.ACCGATCACC	A	G	40	LCB	NA	GT	0	1	1	1	1	1	1	0	0	0	1	0	0	1	0	0	1	0	0	1	1	1	0	0	1	1	1	0	0	0	0	0	0	1	1	1	1	0	0	0	0
NC_022541	6733	AAGCGCTGGA.GAAATTGTTG	G	A	40	LCB	NA	GT	0	0	1	1	1	1	1	0	0	0	1	0	0	1	0	0	1	0	0	1	1	1	0	0	1	1	1	0	0	0	0	0	0	1	1	1	1	0	0	0	0
NC_022541	7153	GCTTCGCGCA.GGCGCACGCC	G	A	40	PASS	NA	GT	0	0	0	0	0	0	0	0	0	0	0	0	0	0	0	0	0	0	0	0	0	0	0	0	0	0	0	0	0	0	0	0	0	0	0	0	0	0	0	0	0
NC_022541	7156	TCGCGCAGGC.GCACGCCTGG	G	C,T	40	PASS	NA	GT	0	1	1	1	1	1	1	1	1	0	1	1	1	1	1	0	1	1	1	1	1	1	1	0	1	1	1	1	1	1	1	1	1	1	1	1	1	1	1	1	1
NC_022541	7159	CGCAGGCGCA.CGCCTGGTTG	C	T	40	PASS	NA	GT	0	1	0	0	0	0	0	1	1	0	0	1	1	0	1	0	0	1	1	0	0	0	1	0	0	0	0	1	1	1	1	1	1	0	0	0	0	1	1	1	1
NC_022541	7177	TGCTGGACGA.AGCCAAGAAG	A	G	40	PASS	NA	GT	0	1	1	1	1	1	1	1	1	0	1	1	1	1	1	0	1	1	1	1	1	1	1	0	1	1	1	1	1	1	1	1	1	1	1	1	1	1	1	1	1
NC_022541	7192	AGAAGGGCCG.TCAGGTGCAG	T	C	40	PASS	NA	GT	0	1	1	1	1	1	1	1	1	0	1	1	1	1	1	0	1	1	1	1	1	1	1	0	1	1	1	1	1	1	1	1	1	1	1	1	1	1	1	1	1
NC_022541	7198	GCCGTCAGGT.GCAGCGCTTC	G	A	40	PASS	NA	GT	0	0	1	1	1	1	1	0	0	0	1	0	0	1	0	0	1	0	0	1	1	1	0	0	1	1	1	0	0	0	0	0	0	1	1	1	1	0	0	0	0
NC_022541	7214	CTTCAAGGGC.CTGGGCGAAA	C	T	40	PASS	NA	GT	0	0	0	0	0	0	0	0	0	0	0	1	1	0	0	0	0	1	0	0	0	0	0	0	0	0	0	0	0	0	0	0	0	0	0	0	0	0	0	0	0
NC_022541	7227	GGCGAAATGA.ACGCCGAGCA	A	G	40	PASS	NA	GT	0	0	0	0	0	0	0	0	0	0	0	0	0	0	0	0	0	0	0	0	0	0	0	0	0	0	0	0	0	0	0	0	0	0	0	0	0	0	0	0	0
NC_022541	7228	GCGAAATGAA.CGCCGAGCAG	C	T	40	PASS	NA	GT	0	1	1	1	1	1	1	1	1	0	1	1	1	1	1	0	1	1	1	1	1	1	1	0	1	1	1	1	1	1	1	1	1	1	1	1	1	1	1	1	1
NC_022541	7240	CCGAGCAGCT.GTGGGAAACC	G	A,C	40	PASS	NA	GT	0	0	0	0	0	0	0	1	1	0	0	0	0	0	1	0	0	0	1	0	0	0	1	0	0	0	0	1	1	1	1	1	1	0	0	0	0	1	1	1	1
NC_022541	7261	CGGTCAACCC.CGACACGCGT	C	G	40	PASS	NA	GT	0	0	0	0	0	0	0	0	0	0	0	0	0	0	0	0	0	0	0	0	0	0	0	0	0	0	0	0	0	0	0	0	0	0	0	0	0	0	0	0	0
NC_022541	7264	TCAACCCCGA.CACGCGTCGC	C	T	40	PASS	NA	GT	0	0	0	0	0	0	0	0	0	0	0	0	0	0	0	0	0	0	0	0	0	0	0	0	0	0	0	0	0	0	0	0	0	0	0	0	0	0	0	0	0
NC_022541	7273	ACACGCGTCG.CCTGTTGCAG	C	T	40	PASS	NA	GT	0	0	1	1	1	1	1	0	0	0	1	0	0	1	0	0	1	0	0	1	1	1	0	0	1	1	1	0	0	0	0	0	0	1	1	1	1	0	0	0	0
NC_022541	7345	GCGATGTGGT.CGAACCACGC	C	T	40	PASS	NA	GT	0	0	0	0	0	0	0	0	0	0	0	0	0	0	0	0	0	0	0	0	0	0	0	0	0	0	0	0	0	0	0	0	0	0	0	0	0	0	0	0	0
NC_022541	7348	ATGTGGTCGA.ACCACGCCGC	A	G	40	PASS	NA	GT	0	1	0	0	0	0	0	0	0	0	0	0	0	0	0	0	0	0	0	0	0	0	0	0	0	0	0	0	0	0	0	0	0	0	0	0	0	0	0	0	0
NC_022541	7351	TGGTCGAACC.ACGCCGCGAC	A	G	40	PASS	NA	GT	0	0	1	1	1	1	1	0	0	0	1	0	0	1	0	0	1	0	0	1	1	1	0	0	1	1	1	0	0	0	0	0	0	1	1	1	1	0	0	0	0
NC_022541	7354	TCGAACCACG.CCGCGACTTC	C	T	40	PASS	NA	GT	0	0	1	1	1	1	1	0	0	0	1	0	0	1	0	0	1	0	0	1	1	1	0	0	1	1	1	0	0	0	0	0	0	1	1	1	1	0	0	0	0
NC_022541	7860	CTGGACCGCG.CTGATCGCCG	C	T	40	PASS	NA	GT	0	0	0	0	0	0	0	0	0	0	0	0	0	0	0	0	0	0	0	0	0	0	0	0	0	0	0	0	0	0	0	0	0	0	0	0	0	0	0	0	0
NC_022541	7863	GACCGCGCTG.ATCGCCGCCG	A	G	40	PASS	NA	GT	0	1	0	0	0	0	0	0	0	0	0	0	0	0	0	0	0	0	0	0	0	0	0	0	0	0	0	0	0	0	0	0	0	0	0	0	0	0	0	0	0
NC_022541	7871	TGATCGCCGC.CGCCGTGTTC	C	G,T	40	PASS	NA	GT	0	0	1	1	1	1	1	0	0	0	1	0	0	2	0	0	1	0	0	1	1	1	0	0	1	1	2	0	0	0	0	0	0	1	1	2	1	0	0	0	0
NC_022541	7874	TCGCCGCCGC.CGTGTTCCTG	C	A,G	40	PASS	NA	GT	0	1	0	0	0	0	0	0	0	0	0	0	0	0	0	0	0	0	0	0	0	0	0	0	0	0	0	0	0	0	0	0	2	0	0	0	0	0	0	0	0
NC_022541	7886	TGTTCCTGCT.GAGCAATCTG	G	C	40	PASS	NA	GT	0	1	1	1	1	1	1	0	0	0	1	0	0	1	0	0	1	0	0	1	1	1	0	0	1	1	1	0	0	0	0	0	0	1	1	1	1	0	0	0	0
NC_022541	7892	TGCTGAGCAA.TCTGGTCAGC	T	C	40	PASS	NA	GT	0	1	1	1	1	1	1	0	0	0	1	0	0	1	0	0	1	0	0	1	1	1	0	0	1	1	1	0	0	0	0	0	0	1	1	1	1	0	0	0	0
NC_022541	7893	GCTGAGCAAT.CTGGTCAGCG	C	T	40	PASS	NA	GT	0	0	1	1	1	1	1	0	0	0	1	0	0	0	0	0	1	0	0	1	1	1	0	0	1	1	0	0	0	0	0	0	0	1	1	0	1	0	0	0	0
NC_022541	7902	TCTGGTCAGC.GCGGCGGCTT	G	A	40	PASS	NA	GT	0	0	0	0	0	0	0	0	0	0	0	0	0	0	0	0	0	1	0	0	0	0	0	0	0	0	0	0	0	0	0	0	0	0	0	0	0	0	0	0	0
NC_022541	7903	CTGGTCAGCG.CGGCGGCTTC	C	T	40	PASS	NA	GT	0	1	1	1	1	1	1	1	1	0	1	1	1	1	1	0	1	1	1	1	1	1	1	0	1	1	1	1	1	1	1	1	1	1	1	1	1	1	1	1	1
NC_022541	7910	GCGCGGCGGC.TTCGGCGTTG	T	C	40	PASS	NA	GT	0	0	1	1	1	1	1	0	0	0	1	0	0	1	0	0	1	0	0	1	1	1	0	0	1	1	1	0	0	0	0	0	0	1	1	1	1	0	0	0	0
NC_022541	7917	GGCTTCGGCG.TTGGGCATCA	T	C	40	PASS	NA	GT	0	0	1	1	1	1	1	0	0	0	1	0	0	1	0	0	1	0	0	1	1	1	0	0	1	1	1	0	0	0	0	0	0	1	1	1	1	0	0	0	0
NC_022541	7919	CTTCGGCGTT.GGGCATCAAG	G	A	40	PASS	NA	GT	0	0	0	0	0	0	0	0	0	0	0	0	0	0	0	0	0	0	0	0	0	0	0	0	0	0	0	0	0	0	0	0	0	0	0	0	0	0	0	0	0
NC_022541	7949	CCAACCTGCC.GTTGATGAAA	G	A	40	PASS	NA	GT	0	0	1	1	1	1	1	0	0	0	1	0	0	1	0	0	1	0	0	1	1	1	0	0	1	1	1	0	0	0	0	0	0	1	1	1	1	0	0	0	0
NC_022541	7956	GCCGTTGATG.AAAGAAGCAC	A	G	40	PASS	NA	GT	0	1	1	1	1	1	1	0	0	0	1	0	0	1	0	0	1	0	0	1	1	1	0	0	1	1	1	0	0	0	0	0	0	1	1	1	1	0	0	0	0
NC_022541	7961	TGATGAAAGA.AGCACTCCAG	A	C	40	PASS	NA	GT	0	1	0	0	0	0	0	0	0	0	0	0	0	0	0	0	0	0	0	0	0	0	0	0	0	0	0	0	0	0	0	0	0	0	0	0	0	0	0	0	0
NC_022541	7964	TGAAAGAAGC.ACTCCAGCAA	A	G	40	PASS	NA	GT	0	1	1	1	1	1	1	1	1	0	1	1	1	1	1	0	1	1	1	1	1	1	1	0	1	1	1	1	1	1	1	1	1	1	1	1	1	1	1	1	1
NC_022541	7973	CACTCCAGCA.ATGGCCGCTG	A	G	40	PASS	NA	GT	0	1	0	0	0	0	0	0	0	0	0	0	0	0	0	0	0	0	0	0	0	0	0	0	0	0	0	0	0	0	0	0	0	0	0	0	0	0	0	0	0
NC_022541	7992	GGCACTGACG.CTGTTCGCGG	C	G,T	40	PASS	NA	GT	0	0	1	1	1	1	1	0	0	0	1	0	0	1	0	0	1	0	0	1	1	1	0	0	1	1	1	0	0	0	0	0	0	1	1	1	1	0	0	0	0
NC_022541	7997	TGACGCTGTT.CGCGGTGGTC	C	T	40	PASS	NA	GT	0	1	0	0	0	0	0	1	1	0	0	1	1	1	1	0	0	1	1	0	0	0	1	0	0	0	1	1	1	1	1	1	1	0	0	1	0	1	1	1	1
NC_022541	8003	TGTTCGCGGT.GGTCATCGCG	G	C	40	PASS	NA	GT	0	0	0	0	0	0	0	0	0	0	0	0	0	0	0	0	0	0	0	0	0	0	0	0	0	0	0	0	0	0	0	0	0	0	0	0	0	0	0	0	0
NC_022541	8004	GTTCGCGGTG.GTCATCGCGC	G	A	40	PASS	NA	GT	0	0	0	0	0	0	0	1	1	0	0	1	1	0	1	0	0	1	1	0	0	0	1	0	0	0	0	1	1	1	1	1	1	0	0	0	0	1	1	1	1
NC_022541	8006	TCGCGGTGGT.CATCGCGCCG	C	G	40	PASS	NA	GT	0	0	0	0	0	0	0	0	0	0	0	0	0	0	0	0	0	0	0	0	0	0	0	0	0	0	0	0	0	0	0	0	0	0	0	0	0	0	0	0	0
NC_022541	8012	TGGTCATCGC.GCCGGCTTAC	G	A	40	PASS	NA	GT	0	0	0	0	0	0	0	0	0	0	0	0	0	1	0	0	0	0	0	0	0	0	0	0	0	0	1	0	0	0	0	0	0	0	0	1	0	0	0	0	0
NC_022541	8016	CATCGCGCCG.GCTTACGAAG	G	A	40	PASS	NA	GT	0	0	0	0	0	0	0	0	0	0	0	0	0	0	0	0	0	0	0	0	0	0	0	0	0	0	0	0	0	0	0	0	0	0	0	0	0	0	0	0	0
NC_022541	8024	CGGCTTACGA.AGAACTGCTG	A	G	40	PASS	NA	GT	0	0	0	0	0	0	0	1	1	0	0	1	1	0	1	0	0	0	1	0	0	0	1	0	0	0	0	1	1	1	1	1	1	0	0	0	0	1	1	1	1
NC_022541	8028	TTACGAAGAA.CTGCTGTTCC	C	T	40	PASS	NA	GT	0	0	0	0	0	0	0	0	0	0	0	0	0	0	0	0	0	1	0	0	0	0	0	0	0	0	0	0	0	0	0	0	0	0	0	0	0	0	0	0	0
NC_022541	8036	AACTGCTGTT.CCGTCGCGTG	C	T	40	PASS	NA	GT	0	1	0	0	0	0	0	0	0	0	0	0	0	0	0	0	0	0	0	0	0	0	0	0	0	0	0	0	0	0	0	0	0	0	0	0	0	0	0	0	0
NC_022541	8057	TGTTCGGGCG.CCTGCTCGCT	C	T	40	PASS	NA	GT	0	0	0	0	0	0	0	1	1	0	0	1	1	0	1	0	0	1	1	0	0	0	1	0	0	0	0	1	1	1	1	1	1	0	0	0	0	1	1	1	1
NC_022541	8071	CTCGCTGCCG.CCCGCCCGTG	C	G	40	PASS	NA	GT	0	1	1	1	1	1	1	0	0	0	1	0	0	1	0	0	1	0	0	1	1	1	0	0	1	1	1	0	0	0	0	0	0	1	1	1	1	0	0	0	0
NC_022541	8072	TCGCTGCCGC.CCGCCCGTGG	C	T	40	PASS	NA	GT	0	0	0	0	0	0	0	0	0	0	0	0	0	0	0	0	0	0	0	0	0	0	0	0	0	0	0	0	0	0	0	0	0	0	0	0	0	0	0	0	0
NC_022541	8078	CCGCCCGCCC.GTGGCTGGGG	G	C,A	40	PASS	NA	GT	0	1	0	0	0	0	0	0	0	0	0	0	0	0	0	0	0	0	0	0	0	0	0	0	0	0	0	0	0	0	0	0	0	0	0	0	0	0	0	0	0
NC_022541	8087	CGTGGCTGGG.GATCGTGCTG	G	C	40	PASS	NA	GT	0	1	1	1	1	1	1	1	1	0	1	1	1	1	1	0	1	1	1	1	1	1	1	0	1	1	1	1	1	1	1	1	1	1	1	1	1	1	1	1	1
NC_022541	8102	TGCTGAGCGG.GGCGATTTTC	G	A	40	PASS	NA	GT	0	0	1	1	1	1	1	1	1	0	1	1	1	0	1	0	1	1	1	1	1	1	1	0	1	1	0	1	1	1	1	1	1	1	1	0	1	1	1	1	1
NC_022541	8103	GCTGAGCGGG.GCGATTTTCG	G	A	40	PASS	NA	GT	0	0	0	0	0	0	0	0	0	0	0	0	0	0	0	0	0	0	0	0	0	0	0	0	0	0	0	0	0	0	0	0	0	0	0	0	0	0	0	0	0
NC_022541	8107	AGCGGGGCGA.TTTTCGCGCT	T	C	40	PASS	NA	GT	0	0	1	1	1	1	1	0	0	0	1	0	0	1	0	0	1	0	0	1	1	1	0	0	1	1	1	0	0	0	0	0	0	1	1	1	1	0	0	0	0
NC_022541	8108	GCGGGGCGAT.TTTCGCGCTG	T	G	40	PASS	NA	GT	0	0	1	1	1	1	1	0	0	0	1	0	0	1	0	0	1	0	0	1	1	1	0	0	1	1	1	0	0	0	0	0	0	1	1	1	1	0	0	0	0
NC_022541	8222	TGTACTGGCG.TACCGGCACG	T	C	40	PASS	NA	GT	0	1	1	1	1	1	1	0	0	0	1	0	0	1	0	0	1	0	0	1	1	1	0	0	1	1	1	0	0	0	0	0	0	1	1	1	1	0	0	0	0
NC_022541	8228	GGCGTACCGG.CACGTTGTGG	C	T	40	PASS	NA	GT	0	1	0	0	0	0	0	0	0	0	0	0	0	0	0	0	0	0	0	0	0	0	0	0	0	0	0	0	0	0	0	0	0	0	0	0	0	0	0	0	0
NC_022541	8232	TACCGGCACG.TTGTGGGCCC	T	C	40	PASS	NA	GT	0	0	0	0	0	0	0	0	0	0	0	0	0	0	0	0	0	0	0	0	0	0	0	0	0	0	0	0	0	0	0	0	0	0	0	0	0	0	0	0	0
NC_022541	8234	CCGGCACGTT.GTGGGCCCCG	G	A	40	PASS	NA	GT	0	1	0	0	0	0	0	0	0	0	0	0	0	0	0	0	0	0	0	0	0	0	0	0	0	0	0	0	0	0	0	0	0	0	0	0	0	0	0	0	0
NC_022541	8240	CGTTGTGGGC.CCCGATTGCC	C	G	40	PASS	NA	GT	0	1	1	1	1	1	1	0	0	0	1	0	0	1	0	0	1	0	0	1	1	1	0	0	1	1	1	0	0	0	0	0	0	1	1	1	1	0	0	0	0
NC_022541	8243	TGTGGGCCCC.GATTGCCGCG	G	C,A	40	PASS	NA	GT	0	1	1	1	1	1	1	0	0	0	1	0	0	1	0	0	1	0	0	1	1	1	0	0	1	1	1	0	0	0	0	0	0	1	1	1	1	0	0	0	0
NC_022541	8252	CGATTGCCGC.GCACGGCATC	G	C	40	PASS	NA	GT	0	0	0	0	0	0	0	0	0	0	0	0	0	1	0	0	0	0	0	0	0	0	0	0	0	0	1	0	0	0	0	0	0	0	0	1	0	0	0	0	0
NC_022541	8255	TTGCCGCGCA.CGGCATCAAC	C	T	40	PASS	NA	GT	0	1	1	1	1	1	1	0	0	0	1	0	0	1	0	0	1	0	0	1	1	1	0	0	1	1	1	0	0	0	0	0	0	1	1	1	1	0	0	0	0
NC_022541	8267	GCATCAACAA.TGCCACGGCC	T	C	40	PASS	NA	GT	0	1	1	1	1	1	1	0	0	0	1	0	0	1	0	0	1	0	0	1	1	1	0	0	1	1	1	0	0	0	0	0	0	1	1	1	1	0	0	0	0
NC_022541	8268	CATCAACAAT.GCCACGGCCC	G	A	40	PASS	NA	GT	0	1	0	0	0	0	0	0	0	0	0	0	0	0	0	0	0	0	0	0	0	0	0	0	0	0	0	0	0	0	0	0	0	0	0	0	0	0	0	0	0
NC_022541	8273	ACAATGCCAC.GGCCCTGGCA	G	A	40	PASS	NA	GT	0	0	0	0	0	0	0	1	1	0	0	1	1	0	1	0	0	0	1	0	0	0	1	0	0	0	0	1	1	1	1	1	0	0	0	0	0	1	1	1	1
NC_022541	8276	ATGCCACGGC.CCTGGCAGCG	C	G	40	PASS	NA	GT	0	0	0	0	0	0	0	0	0	0	0	0	0	0	0	0	0	0	0	0	0	0	0	0	0	0	0	0	0	0	0	0	0	0	0	0	0	0	0	0	0
NC_022541	8282	CGGCCCTGGC.AGCGCTGTAC	A	T	40	PASS	NA	GT	0	0	0	0	0	0	0	0	0	0	0	0	0	0	0	0	0	0	0	0	0	0	0	0	0	0	0	0	0	0	0	0	0	0	0	0	0	0	0	0	0
NC_022541	8303	TTTTCGGGCT.TGGCTGAGCC	T	C	40	PASS	NA	GT	0	0	1	1	1	1	1	0	0	0	1	0	0	1	0	0	1	0	0	1	1	1	0	0	1	1	1	0	0	0	0	0	0	1	1	1	1	0	0	0	0
NC_022541	8314	GGCTGAGCCC.CCAAAGCGGT	C	T	40	PASS	NA	GT	0	0	0	0	0	0	0	0	0	0	0	0	0	1	0	0	0	0	0	0	0	0	0	0	0	0	1	0	0	0	0	0	0	0	0	1	0	0	0	0	0
NC_022541	8315	GCTGAGCCCC.CAAAGCGGTC	C	A	40	PASS	NA	GT	0	1	0	0	0	0	0	1	1	0	0	1	1	0	1	0	0	1	1	0	0	0	1	0	0	0	0	1	1	1	1	1	1	0	0	0	0	1	1	1	1
NC_022541	8316	CTGAGCCCCC.AAAGCGGTCA	A	C	40	PASS	NA	GT	0	1	0	0	0	0	0	0	0	0	0	0	0	0	0	0	0	0	0	0	0	0	0	0	0	0	0	0	0	0	0	0	0	0	0	0	0	0	0	0	0
NC_022541	8322	CCCCAAAGCG.GTCAATTGCG	G	A	40	PASS	NA	GT	0	0	0	0	0	0	0	0	0	0	0	0	0	0	0	0	0	0	0	0	0	0	0	0	0	0	0	0	0	0	0	0	0	0	0	0	0	0	0	0	0
NC_022541	8325	CAAAGCGGTC.AATTGCGAGA	A	T,G	40	PASS	NA	GT	0	0	0	0	0	0	0	1	1	0	0	2	2	0	1	0	0	2	1	0	0	0	1	0	0	0	0	1	1	1	1	1	2	0	0	0	0	1	1	1	1
NC_022541	8326	AAAGCGGTCA.ATTGCGAGAA	A	C,G	40	PASS	NA	GT	0	1	0	0	0	0	0	1	1	0	0	1	1	0	1	0	0	1	1	0	0	0	1	0	0	0	0	1	1	1	1	1	1	0	0	0	0	1	1	1	1
NC_022541	8327	AAGCGGTCAA.TTGCGAGAAC	T	A,C	40	PASS	NA	GT	0	1	2	2	2	2	2	0	0	0	2	0	0	2	0	0	2	0	0	2	2	2	0	0	2	2	2	0	0	0	0	0	0	2	2	2	2	0	0	0	0
NC_022541	8328	AGCGGTCAAT.TGCGAGAACC	T	G	40	PASS	NA	GT	0	0	0	0	0	0	0	0	0	0	0	0	0	0	0	0	0	0	0	0	0	0	0	0	0	0	0	0	0	0	0	0	0	0	0	0	0	0	0	0	0
NC_022541	8329	GCGGTCAATT.GCGAGAACCC	G	A	40	PASS	NA	GT	0	0	1	1	1	1	1	0	0	0	1	0	0	1	0	0	1	0	0	1	1	1	0	0	1	1	1	0	0	0	0	0	0	1	1	1	1	0	0	0	0
NC_022541	8335	AATTGCGAGA.ACCCAGCCGC	A	G	40	PASS	NA	GT	0	0	0	0	0	0	0	0	0	0	0	0	0	0	0	0	0	0	0	0	0	0	0	0	0	0	0	0	0	0	0	0	0	0	0	0	0	0	0	0	0
NC_022541	8336	ATTGCGAGAA.CCCAGCCGCA	C	T	40	PASS	NA	GT	0	0	1	1	1	1	1	0	0	0	1	0	0	1	0	0	1	0	0	1	1	1	0	0	1	1	1	0	0	0	0	0	0	1	1	1	1	0	0	0	0
NC_022541	8342	AGAACCCAGC.CGCAGCGGGG	C	T	40	PASS	NA	GT	0	0	0	0	0	0	0	0	0	0	0	1	1	0	0	0	0	0	0	0	0	0	0	0	0	0	0	0	0	0	0	0	0	0	0	0	0	0	0	0	0
NC_022541	8348	CAGCCGCAGC.GGGGCGATGC	G	T	40	PASS	NA	GT	0	0	0	0	0	0	0	0	0	0	0	0	0	0	0	0	0	0	0	0	0	0	0	0	0	0	0	0	0	0	0	0	0	0	0	0	0	0	0	0	0
NC_022541	8352	CGCAGCGGGG.CGATGCCTGG	C	T	40	PASS	NA	GT	0	0	0	0	0	0	0	0	0	0	0	0	0	0	0	0	0	0	0	0	0	0	0	0	0	0	0	0	0	0	0	0	0	0	0	0	0	0	0	0	0
NC_022541	8354	CAGCGGGGCG.ATGCCTGGGC	A	G	40	PASS	NA	GT	0	1	1	1	1	1	1	1	1	0	1	1	1	1	1	0	1	1	1	1	1	1	1	0	1	1	1	1	1	1	1	1	1	1	1	1	1	1	1	1	1
NC_022541	8355	AGCGGGGCGA.TGCCTGGGCA	T	C	40	PASS	NA	GT	0	1	1	1	1	1	1	1	1	0	1	1	1	1	1	0	1	1	1	1	1	1	1	0	1	1	1	1	1	1	1	1	1	1	1	1	1	1	1	1	1
NC_022541	8357	CGGGGCGATG.CCTGGGCATC	C	T	40	PASS	NA	GT	0	0	0	0	0	0	0	0	0	0	0	0	0	0	0	0	0	0	0	0	0	0	0	0	0	0	0	0	0	0	0	0	0	0	0	0	0	0	0	0	0
NC_022541	8358	GGGGCGATGC.CTGGGCATCA	C	T	40	PASS	NA	GT	0	0	0	0	0	0	0	1	1	0	0	1	1	0	1	0	0	1	1	0	0	0	1	0	0	0	0	1	1	1	1	1	1	0	0	0	0	1	1	1	1
NC_022541	8359	GGGCGATGCC.TGGGCATCAA	T	C	40	PASS	NA	GT	0	1	0	0	0	0	0	0	0	0	0	0	0	0	0	0	0	0	0	0	0	0	0	0	0	0	0	0	0	0	0	0	0	0	0	0	0	0	0	0	0
NC_022541	8365	TGCCTGGGCA.TCAAATGGAT	T	C,A	40	PASS	NA	GT	0	1	2	2	2	2	2	0	0	0	2	0	0	2	0	0	2	0	0	2	2	2	0	0	2	2	2	0	0	0	0	0	0	2	2	2	2	0	0	0	0
NC_022541	8366	GCCTGGGCAT.CAAATGGATT	C	G	40	PASS	NA	GT	0	0	0	0	0	0	0	0	0	0	0	0	0	0	0	0	0	0	0	0	0	0	0	0	0	0	0	0	0	0	0	0	0	0	0	0	0	0	0	0	0
NC_022541	8367	CCTGGGCATC.AAATGGATTC	A	G,C	40	PASS	NA	GT	0	1	2	2	2	2	2	0	0	0	2	0	0	2	0	0	2	0	0	2	2	2	0	0	2	2	2	0	0	0	0	0	0	2	2	2	2	0	0	0	0
NC_022541	8368	CTGGGCATCA.AATGGATTCG	A	G	40	PASS	NA	GT	0	0	0	0	0	0	0	0	0	0	0	0	0	0	0	0	0	0	0	0	0	0	0	0	0	0	0	0	0	0	0	0	0	0	0	0	0	0	0	0	0
NC_022541	8370	GGGCATCAAA.TGGATTCGCA	T	G	40	PASS	NA	GT	0	0	0	0	0	0	0	0	0	0	0	0	0	0	0	0	0	0	0	0	0	0	0	0	0	0	0	0	0	0	0	0	0	0	0	0	0	0	0	0	0
NC_022541	8371	GGCATCAAAT.GGATTCGCAC	G	A	40	PASS	NA	GT	0	0	0	0	0	0	0	0	0	0	0	0	0	0	0	0	0	0	0	0	0	0	0	0	0	0	0	0	0	0	0	0	0	0	0	0	0	0	0	0	0
NC_022541	8372	GCATCAAATG.GATTCGCACA	G	A	40	PASS	NA	GT	0	0	0	0	0	0	0	0	0	0	0	0	0	0	0	0	0	0	0	0	0	0	0	0	0	0	0	0	0	0	0	0	0	0	0	0	0	0	0	0	0
NC_022541	8375	TCAAATGGAT.TCGCACACCT	T	C	40	PASS	NA	GT	0	1	1	1	1	1	1	1	1	0	1	1	1	1	1	0	1	1	1	1	1	1	1	0	1	1	1	1	1	1	1	1	1	1	1	1	1	1	1	1	1
NC_022541	8377	AAATGGATTC.GCACACCTTG	G	A	40	PASS	NA	GT	0	0	0	0	0	0	0	0	0	0	0	0	0	0	0	0	0	0	0	0	0	0	0	0	0	0	0	0	0	0	0	0	0	0	0	0	0	0	0	0	0
NC_022541	8378	AATGGATTCG.CACACCTTGG	C	T	40	PASS	NA	GT	0	0	1	1	1	1	1	0	0	0	1	0	0	1	0	0	1	0	0	1	1	1	0	0	1	1	1	0	0	0	0	0	0	1	1	1	1	0	0	0	0
NC_022541	8381	GGATTCGCAC.ACCTTGGACA	A	G	40	PASS	NA	GT	0	1	1	1	1	1	1	0	0	0	1	0	0	1	0	0	1	0	0	1	1	1	0	0	1	1	1	0	0	0	0	0	0	1	1	1	1	0	0	0	0
NC_022541	8383	ATTCGCACAC.CTTGGACAGC	C	T	40	PASS	NA	GT	0	1	1	1	1	1	1	0	0	0	1	0	0	1	0	0	1	0	0	1	1	1	0	0	1	1	1	0	0	0	0	0	0	1	1	1	1	0	0	0	0
NC_022541	8384	TTCGCACACC.TTGGACAGCC	T	C,G	40	PASS	NA	GT	0	0	1	1	1	1	1	2	2	0	1	2	2	1	2	0	1	2	2	1	1	1	2	0	1	1	1	2	2	2	2	2	2	1	1	1	1	2	2	2	2
NC_022541	8387	GCACACCTTG.GACAGCCGAT	G	C,A	40	PASS	NA	GT	0	0	0	0	0	0	0	0	0	0	0	0	0	0	0	0	0	0	0	0	0	0	0	0	0	0	0	0	0	0	0	0	0	0	0	0	0	0	0	0	0
NC_022541	8389	ACACCTTGGA.CAGCCGATCG	C	G	40	PASS	NA	GT	0	0	0	0	0	0	0	0	0	0	0	0	0	0	0	0	0	0	0	0	0	0	0	0	0	0	0	0	0	0	0	0	0	0	0	0	0	0	0	0	0
NC_022541	8391	ACCTTGGACA.GCCGATCGCC	G	A	40	PASS	NA	GT	0	0	1	1	1	1	1	0	0	0	1	0	0	1	0	0	1	0	0	1	1	1	0	0	1	1	1	0	0	0	0	0	0	1	1	1	1	0	0	0	0
NC_022541	8398	ACAGCCGATC.GCCCCGGCCC	G	C,A	40	PASS	NA	GT	0	0	0	0	0	0	0	0	0	0	0	0	0	0	0	0	0	0	0	0	0	0	0	0	0	0	0	0	0	0	0	0	0	0	0	0	0	0	0	0	0
NC_022541	8400	AGCCGATCGC.CCCGGCCCGG	C	T	40	PASS	NA	GT	0	0	1	1	1	1	1	1	1	0	1	1	1	1	1	0	1	1	1	1	1	1	1	0	1	1	1	1	1	1	1	1	1	1	1	1	1	1	1	1	1
NC_022541	8403	CGATCGCCCC.GGCCCGGCAC	G	T	40	PASS	NA	GT	0	0	0	0	0	0	0	0	0	0	0	0	0	0	0	0	0	0	0	0	0	0	0	0	0	0	0	0	0	0	0	0	0	0	0	0	0	0	0	0	0
NC_022541	8406	TCGCCCCGGC.CCGGCACACG	C	T	40	PASS	NA	GT	0	0	0	0	0	0	0	0	0	0	0	0	0	0	0	0	0	0	0	0	0	0	0	0	0	0	0	0	0	0	0	0	0	0	0	0	0	0	0	0	0
NC_022541	8407	CGCCCCGGCC.CGGCACACGT	C	G,A	40	PASS	NA	GT	0	1	2	2	2	2	2	0	0	0	2	0	0	2	0	0	2	0	0	2	2	2	0	0	2	2	2	0	0	0	0	0	0	2	2	2	2	0	0	0	0
NC_022541	8411	CCGGCCCGGC.ACACGTTATC	A	T	40	PASS	NA	GT	0	0	0	0	0	0	0	0	0	0	0	0	0	0	0	0	0	0	0	0	0	0	0	0	0	0	0	0	0	0	0	0	0	0	0	0	0	0	0	0	0
NC_022541	8412	CGGCCCGGCA.CACGTTATCG	C	T	40	PASS	NA	GT	0	0	1	1	1	1	1	0	0	0	1	0	0	1	0	0	1	0	0	1	1	1	0	0	1	1	1	0	0	0	0	0	0	1	1	1	1	0	0	0	0
NC_022541	8413	GGCCCGGCAC.ACGTTATCGG	A	G	40	PASS	NA	GT	0	1	1	1	1	1	1	1	1	0	1	1	1	1	1	0	1	1	1	1	1	1	1	0	1	1	1	1	1	1	1	1	1	1	1	1	1	1	1	1	1
NC_022541	8415	CCCGGCACAC.GTTATCGGCC	G	T	40	PASS	NA	GT	0	0	0	0	0	0	0	0	0	0	0	0	0	0	0	0	0	0	0	0	0	0	0	0	0	0	0	0	0	0	0	0	0	0	0	0	0	0	0	0	0
NC_022541	8417	CGGCACACGT.TATCGGCCGC	T	C	40	PASS	NA	GT	0	1	0	0	0	0	0	0	0	0	0	0	0	0	0	0	0	0	0	0	0	0	0	0	0	0	0	0	0	0	0	0	0	0	0	0	0	0	0	0	0
NC_022541	8418	GGCACACGTT.ATCGGCCGCG	A	G	40	PASS	NA	GT	0	0	0	0	0	0	0	0	0	0	0	0	0	0	0	0	0	0	0	0	0	0	0	0	0	0	0	0	0	0	0	0	0	0	0	0	0	0	0	0	0
NC_022541	8421	ACACGTTATC.GGCCGCGCGG	G	T	40	PASS	NA	GT	0	0	0	0	0	0	0	0	0	0	0	0	0	0	0	0	0	0	0	0	0	0	0	0	0	0	0	0	0	0	0	0	0	0	0	0	0	0	0	0	0
NC_022541	8424	CGTTATCGGC.CGCGCGGAAC	C	T	40	PASS	NA	GT	0	0	1	1	1	1	1	0	0	0	1	0	0	1	0	0	1	0	0	1	1	1	0	0	1	1	1	0	0	0	0	0	0	1	1	1	1	0	0	0	0
NC_022541	8427	TATCGGCCGC.GCGGAACCGT	G	A	40	PASS	NA	GT	0	1	1	1	1	1	1	0	0	0	1	0	0	1	0	0	1	0	0	1	1	1	0	0	1	1	1	0	0	0	0	0	0	1	1	1	1	0	0	0	0
NC_022541	8465	GAGCCTGCCA.AAATGCCTCC	A	G	40	PASS	NA	GT	0	1	1	1	1	1	1	0	0	0	1	0	0	1	0	0	1	0	0	1	1	1	0	0	1	1	1	0	0	0	0	0	0	1	1	1	1	0	0	0	0
NC_022541	8470	TGCCAAAATG.CCTCCATGGT	C	T	40	PASS	NA	GT	0	0	0	0	0	0	0	0	0	0	0	0	0	0	0	0	0	0	0	0	0	0	0	0	0	0	0	0	0	0	0	0	0	0	0	0	0	0	0	0	0
NC_022541	8472	CCAAAATGCC.TCCATGGTTC	T	C	40	PASS	NA	GT	0	1	1	1	1	1	1	0	0	0	1	0	0	1	0	0	1	0	0	1	1	1	0	0	1	1	1	0	0	0	0	0	0	1	1	1	1	0	0	0	0
NC_022541	8473	CAAAATGCCT.CCATGGTTCT	C	T	40	PASS	NA	GT	0	0	1	1	1	1	1	0	0	0	1	0	0	1	0	0	1	0	0	1	1	1	0	0	1	1	1	0	0	0	0	0	0	1	1	1	1	0	0	0	0
NC_022541	8544	TGACGGCGTG.TGCCACCACA	T	C	40	PASS	NA	GT	0	0	1	1	1	1	1	0	0	0	1	0	0	1	0	0	1	0	0	1	1	1	0	0	1	1	1	0	0	0	0	0	0	1	1	1	1	0	0	0	0
NC_022541	8952	GCCTGGGCAT.CATCGGCGCG	C	T	40	PASS	NA	GT	0	0	0	0	0	0	0	0	0	0	0	0	0	0	0	0	0	0	0	0	0	0	0	0	0	0	0	0	0	0	0	0	0	0	0	0	0	0	0	0	0
NC_022541	8961	TCATCGGCGC.GCTTGCCGGC	G	A	40	PASS	NA	GT	0	1	1	1	1	1	1	0	0	0	1	0	0	1	0	0	1	0	0	1	1	1	0	0	1	1	1	0	0	0	0	0	0	1	1	1	1	0	0	0	0
NC_022541	8964	TCGGCGCGCT.TGCCGGCGCC	T	C	40	PASS	NA	GT	0	1	1	1	1	1	1	1	1	0	1	1	1	1	1	0	1	1	1	1	1	1	1	0	1	1	1	1	1	1	1	1	1	1	1	1	1	1	1	1	1
NC_022541	8970	CGCTTGCCGG.CGCCGCCTAT	C	T	40	PASS	NA	GT	0	0	0	0	0	0	0	1	1	0	0	1	1	0	1	0	0	1	1	0	0	0	1	0	0	0	0	1	1	1	1	1	1	0	0	0	0	1	1	1	1
NC_022541	8973	TTGCCGGCGC.CGCCTATGGC	C	T,G	40	PASS	NA	GT	0	1	0	0	0	0	0	0	0	0	0	0	0	0	0	0	0	0	0	0	0	0	0	0	0	0	0	0	0	0	0	0	0	0	0	0	0	0	0	0	0
NC_022541	8985	CCTATGGCGA.CGGAGCGGCC	C	T	40	PASS	NA	GT	0	0	1	1	1	1	1	0	0	0	1	0	0	1	0	0	1	0	0	1	1	1	0	0	1	1	1	0	0	0	0	0	0	1	1	1	1	0	0	0	0
NC_022541	8988	ATGGCGACGG.AGCGGCCAGC	A	G	40	PASS	NA	GT	0	1	0	0	0	0	0	1	1	0	0	1	1	1	1	0	0	1	1	0	0	0	1	0	0	0	1	1	1	1	1	1	1	0	0	1	0	1	1	1	1
NC_022541	8991	GCGACGGAGC.GGCCAGCGCA	G	C	40	PASS	NA	GT	0	0	0	0	0	0	0	0	0	0	0	0	0	0	0	0	0	0	0	0	0	0	0	0	0	0	0	0	0	0	0	0	0	0	0	0	0	0	0	0	0
NC_022541	8996	GGAGCGGCCA.GCGCAGTCAA	G	A	40	PASS	NA	GT	0	0	0	0	0	0	0	0	0	0	0	0	0	0	0	0	0	0	0	0	0	0	0	0	0	0	0	0	0	0	0	0	0	0	0	0	0	0	0	0	0
NC_022541	8997	GAGCGGCCAG.CGCAGTCAAT	C	T	40	PASS	NA	GT	0	0	0	0	0	0	0	0	0	0	0	0	0	0	0	0	0	0	0	0	0	0	0	0	0	0	0	0	0	0	0	0	0	0	0	0	0	0	0	0	0
NC_022541	9003	CCAGCGCAGT.CAATCAGGTC	C	T	40	PASS	NA	GT	0	0	0	0	0	0	0	0	0	0	0	0	0	0	0	0	0	0	0	0	0	0	0	0	0	0	0	0	0	0	0	0	0	0	0	0	0	0	0	0	0
NC_022541	9012	TCAATCAGGT.CGGCGGTATG	C	T	40	PASS	NA	GT	0	0	1	1	1	1	1	0	0	0	1	0	0	1	0	0	1	0	0	1	1	1	0	0	1	1	1	0	0	0	0	0	0	1	1	1	1	0	0	0	0
NC_022541	9015	ATCAGGTCGG.CGGTATGACC	C	G	40	PASS	NA	GT	0	0	0	0	0	0	0	0	0	0	0	0	0	0	0	0	0	0	0	0	0	0	0	0	0	0	0	0	0	0	0	0	0	0	0	0	0	0	0	0	0
NC_022541	9024	GCGGTATGAC.CGCCCAGACA	C	T	40	PASS	NA	GT	0	1	0	0	0	0	0	0	0	0	0	0	0	0	0	0	0	0	0	0	0	0	0	0	0	0	0	0	0	0	0	0	0	0	0	0	0	0	0	0	0
NC_022541	9036	CCCAGACAGT.GTTCCTGCTG	G	A	40	PASS	NA	GT	0	0	0	0	0	0	0	1	1	0	0	1	1	0	1	0	0	1	1	0	0	0	1	0	0	0	0	1	1	1	1	1	1	0	0	0	0	1	1	1	1
NC_022541	9038	CAGACAGTGT.TCCTGCTGCC	T	A	40	PASS	NA	GT	0	0	0	0	0	0	0	0	0	0	0	0	0	0	0	0	0	0	0	0	0	0	0	0	0	0	0	0	0	0	0	0	0	0	0	0	0	0	0	0	0
NC_022541	9042	CAGTGTTCCT.GCTGCCGGGC	G	A	40	PASS	NA	GT	0	0	0	0	0	0	0	0	0	0	0	0	0	0	0	0	0	0	0	0	0	0	0	0	0	0	0	0	0	0	0	0	0	0	0	0	0	0	0	0	0
NC_022541	9043	AGTGTTCCTG.CTGCCGGGCT	C	T	40	PASS	NA	GT	0	0	0	0	0	0	0	0	0	0	0	0	0	0	0	0	0	0	0	0	0	0	0	0	0	0	0	0	0	0	0	0	0	0	0	0	0	0	0	0	0
NC_022541	9048	TCCTGCTGCC.GGGCTCGCGT	G	C	40	PASS	NA	GT	0	1	1	1	1	1	1	0	0	0	1	0	0	1	0	0	1	0	0	1	1	1	0	0	1	1	1	0	0	0	0	0	0	1	1	1	1	0	0	0	0
NC_022541	9069	CCCAGGAAAG.CGAAGCCGAT	C	T	40	PASS	NA	GT	0	0	0	0	0	0	0	0	0	0	0	0	0	0	0	0	0	0	0	0	0	0	0	0	0	0	0	0	0	0	0	0	0	0	0	0	0	0	0	0	0
NC_022541	9072	AGGAAAGCGA.AGCCGATGTG	A	G	40	PASS	NA	GT	0	0	0	0	0	0	0	0	0	0	0	0	0	0	0	0	0	0	0	0	0	0	0	0	0	0	0	0	0	0	0	0	0	0	0	0	0	0	0	0	0
NC_022541	9075	AAAGCGAAGC.CGATGTGGTC	C	A	40	PASS	NA	GT	0	0	0	0	0	0	0	0	0	0	0	0	0	0	0	0	0	0	0	0	0	0	0	0	0	0	0	0	0	0	0	0	0	0	0	0	0	0	0	0	0
NC_022541	9081	AAGCCGATGT.GGTCGGCCAA	G	C	40	PASS	NA	GT	0	0	0	0	0	0	0	0	0	0	0	0	0	0	0	0	0	0	0	0	0	0	0	0	0	0	0	0	0	0	0	0	0	0	0	0	0	0	0	0	0
NC_022541	9084	CCGATGTGGT.CGGCCAACGT	C	G	40	PASS	NA	GT	0	0	0	0	0	0	0	0	0	0	0	0	0	0	0	0	0	0	0	0	0	0	0	0	0	0	0	0	0	0	0	0	0	0	0	0	0	0	0	0	0
NC_022541	9093	TCGGCCAACG.TCTGATGGCC	T	C	40	PASS	NA	GT	0	0	1	1	1	1	1	0	0	0	1	0	0	1	0	0	1	0	0	1	1	1	0	0	1	1	1	0	0	0	0	0	0	1	1	1	1	0	0	0	0
NC_022541	9111	CCCAGGCCGG.GTTCGATCCG	G	C,A	40	PASS	NA	GT	0	1	0	0	0	0	0	2	2	0	0	2	2	0	2	0	0	0	2	0	0	0	2	0	0	0	0	2	2	2	2	2	2	0	0	0	0	2	2	2	2
NC_022541	9117	CCGGGTTCGA.TCCGGCGCAG	T	C	40	PASS	NA	GT	0	0	0	0	0	0	0	0	0	0	0	0	0	0	0	0	0	0	0	0	0	0	0	0	0	0	0	0	0	0	0	0	0	0	0	0	0	0	0	0	0
NC_022541	9120	GGTTCGATCC.GGCGCAGGCG	G	C	40	PASS	NA	GT	0	0	0	0	0	0	0	0	0	0	0	0	0	0	0	0	0	0	0	0	0	0	0	0	0	0	0	0	0	0	0	0	0	0	0	0	0	0	0	0	0
NC_022541	9123	TCGATCCGGC.GCAGGCGGTG	G	A	40	PASS	NA	GT	0	0	0	0	0	0	0	0	0	0	0	0	0	0	0	0	0	0	0	0	0	0	0	0	0	0	0	0	0	0	0	0	0	0	0	0	0	0	0	0	0
NC_022541	9138	CGGTGACGCT.GTGGCAGAAC	G	A	40	PASS	NA	GT	0	0	0	0	0	0	0	1	1	0	0	1	1	0	1	0	0	1	1	0	0	0	1	0	0	0	0	1	1	1	1	1	1	0	0	0	0	1	1	1	1
NC_022541	9622	CCCTGTTCAT.CGCCGCGTCG	C	T	40	PASS	NA	GT	0	0	1	1	1	1	1	0	0	0	1	0	0	1	0	0	1	0	0	1	1	1	0	0	1	1	1	0	0	0	0	0	0	1	1	1	1	0	0	0	0
NC_022541	9630	ATCGCCGCGT.CGCTGGGTGG	C	T	40	PASS	NA	GT	0	0	0	0	0	0	0	0	0	0	0	0	0	0	0	0	0	0	0	0	0	0	0	0	0	0	0	0	0	0	0	0	0	0	0	0	0	0	0	0	0
NC_022541	9646	GTGGGGCTGT.CGTTACCGAT	C	T	40	PASS	NA	GT	0	0	0	0	1	0	0	0	0	0	0	0	0	0	0	0	0	0	0	0	0	0	0	0	0	0	0	0	0	0	0	0	0	0	0	0	0	0	0	0	0
NC_022541	9649	GGGCTGTCGT.TACCGATGCG	T	C	40	PASS	NA	GT	0	1	1	1	1	1	1	1	1	0	1	1	1	1	1	0	1	1	1	1	1	1	1	0	1	1	1	1	1	1	1	1	1	1	1	1	1	1	1	1	1
NC_022541	9661	CCGATGCGGT.CGCGCAGTCG	C	T	40	PASS	NA	GT	0	0	0	0	0	0	0	0	0	0	0	0	0	0	0	0	0	0	0	0	0	0	0	0	0	0	0	0	0	0	0	0	0	0	0	0	0	0	0	0	0
NC_022541	9682	ACCGTTCCTC.GGACCGTTCC	G	C	40	PASS	NA	GT	0	1	1	1	1	1	1	1	1	0	1	1	1	1	1	0	1	1	1	1	1	1	1	0	1	1	1	1	1	1	1	1	1	1	1	1	1	1	1	1	1
NC_022541	9685	GTTCCTCGGA.CCGTTCCAGC	C	A,G	40	PASS	NA	GT	0	1	2	2	2	2	2	1	1	0	2	1	1	2	1	0	2	1	1	2	2	2	1	0	2	2	2	1	1	1	1	1	1	2	2	2	2	1	1	1	1
NC_022541	9688	CCTCGGACCG.TTCCAGCCGC	T	C,G	40	PASS	NA	GT	0	1	0	0	0	0	0	2	2	0	0	2	2	0	2	0	0	2	2	0	0	0	2	0	0	0	0	2	2	2	2	2	2	0	0	0	0	2	2	2	2
NC_022541	9689	CTCGGACCGT.TCCAGCCGCA	T	G	40	PASS	NA	GT	0	1	1	1	1	1	1	1	1	0	1	1	1	1	1	0	1	1	1	1	1	1	1	0	1	1	1	1	1	1	1	1	1	1	1	1	1	1	1	1	1
NC_022541	9691	CGGACCGTTC.CAGCCGCAAA	C	T	40	PASS	NA	GT	0	0	0	0	0	0	0	0	1	0	0	0	0	0	0	0	0	0	0	0	0	0	0	0	0	0	0	0	0	0	0	0	0	0	0	0	0	0	1	0	0
NC_022541	9696	CGTTCCAGCC.GCAAATCCAA	G	A	40	PASS	NA	GT	0	0	0	0	0	0	0	0	0	0	0	1	1	0	0	0	0	0	0	0	0	0	0	0	0	0	0	0	0	0	0	0	0	0	0	0	0	0	0	0	0
NC_022541	9697	GTTCCAGCCG.CAAATCCAAG	C	T	40	PASS	NA	GT	0	0	0	0	0	0	0	1	1	0	0	1	1	0	1	0	0	1	1	0	0	0	1	0	0	0	0	1	1	1	1	1	1	0	0	0	0	1	1	1	1
NC_022541	9700	CCAGCCGCAA.ATCCAAGAGC	A	G	40	PASS	NA	GT	0	0	1	1	1	1	1	0	0	0	1	0	0	1	0	0	1	0	0	1	1	1	0	0	1	1	1	0	0	0	0	0	0	1	1	1	1	0	0	0	0
NC_022541	9706	GCAAATCCAA.GAGCGGCAAG	G	A	40	PASS	NA	GT	0	1	0	0	0	0	0	0	0	0	0	0	0	0	0	0	0	0	0	0	0	0	0	0	0	0	0	0	0	0	0	0	0	0	0	0	0	0	0	0	0
NC_022541	9718	GCGGCAAGGC.CGAGGAGCTG	C	T	40	PASS	NA	GT	0	0	0	0	0	0	0	0	0	0	0	1	1	0	0	0	0	0	0	0	0	0	0	0	0	0	0	0	0	0	0	0	0	0	0	0	0	0	0	0	0
NC_022541	9724	AGGCCGAGGA.GCTGTACCCG	G	A	40	PASS	NA	GT	0	0	0	0	0	0	0	0	0	0	0	0	0	1	0	0	0	0	0	0	0	0	0	0	0	0	1	0	0	0	0	0	0	0	0	1	0	0	0	0	0
NC_022541	9733	AGCTGTACCC.GCAGTCGACC	G	C	40	PASS	NA	GT	0	0	0	0	0	0	0	0	0	0	0	0	0	1	0	0	0	0	0	0	0	0	0	0	0	0	1	0	0	0	0	0	0	0	0	1	0	0	0	0	0
NC_022541	9745	AGTCGACCCG.TCAGGCACCG	T	C	40	PASS	NA	GT	0	1	1	1	1	1	1	1	1	0	1	1	1	1	1	0	1	1	1	1	1	1	1	0	1	1	1	1	1	1	1	1	1	1	1	1	1	1	1	1	1
NC_022541	9772	AGCCGTCCTC.GAAGTTGAGC	G	C	40	PASS	NA	GT	0	1	0	0	0	0	0	0	0	0	0	0	0	0	0	0	0	0	0	0	0	0	0	0	0	0	0	0	0	0	0	0	0	0	0	0	0	0	0	0	0
NC_022541	9788	GAGCAGCAAG.CTGCAGAAGC	C	T	40	PASS	NA	GT	0	0	0	0	0	0	0	0	0	0	0	0	0	1	0	0	0	0	0	0	0	0	0	0	0	0	1	0	0	0	0	0	0	0	0	1	0	0	0	0	0
NC_022541	9806	GCTGATCGAA.ACCTTCAACA	A	G	40	PASS	NA	GT	0	0	0	0	0	0	0	0	0	0	0	1	1	0	0	0	0	0	0	0	0	0	0	0	0	0	0	0	0	0	0	0	0	0	0	0	0	0	0	0	0
NC_022541	9820	TCAACAAGGG.CGAGGACTAC	C	T	40	PASS	NA	GT	0	0	0	0	0	0	0	0	0	0	0	0	0	0	0	0	0	0	0	0	0	0	0	0	0	0	0	0	0	0	0	0	0	0	0	0	0	0	0	0	0
NC_022541	9823	ACAAGGGCGA.GGACTACCAG	G	A	40	PASS	NA	GT	0	0	1	1	1	1	1	0	0	0	1	0	0	0	0	0	1	0	0	1	1	1	0	0	1	1	0	0	0	0	0	0	0	1	1	0	1	0	0	0	0
NC_022541	9831	GAGGACTACC.AGGGCGTGCG	A	C	40	PASS	NA	GT	0	0	1	1	1	1	1	0	0	0	1	0	0	1	0	0	1	0	0	1	1	1	0	0	1	1	1	0	0	0	0	0	0	1	1	1	1	0	0	0	0
NC_022541	9832	AGGACTACCA.GGGCGTGCGC	G	A	40	PASS	NA	GT	0	1	1	1	1	1	1	1	1	0	1	1	1	1	1	0	1	1	1	1	1	1	1	0	1	1	1	1	1	1	1	1	1	1	1	1	1	1	1	1	1
NC_022541	9869	CCTGGCCAAC.GGCGCTGCCA	G	A	40	PASS	NA	GT	0	1	1	1	1	1	1	1	1	0	1	1	1	1	1	0	1	1	1	1	1	1	1	0	1	1	1	1	1	1	1	1	1	1	1	1	1	1	1	1	1
NC_022541	9874	CCAACGGCGC.TGCCAACGAC	T	G	40	PASS	NA	GT	0	0	0	0	0	0	0	1	1	0	0	1	1	0	1	0	0	1	1	0	0	0	1	0	0	0	0	1	1	1	1	1	1	0	0	0	0	1	1	1	1
NC_022541	9877	ACGGCGCTGC.CAACGACGCC	C	G,A	40	PASS	NA	GT	0	0	0	0	0	0	0	1	1	0	0	1	1	0	1	0	0	1	1	0	0	0	1	0	0	0	0	1	1	1	1	1	2	0	0	0	0	1	1	1	1
NC_022541	9883	CTGCCAACGA.CGCCGACAAG	C	T	40	PASS	NA	GT	0	0	0	0	0	0	0	0	0	0	0	0	0	0	0	0	0	0	0	0	0	0	0	0	0	0	0	0	0	0	0	0	0	0	0	0	0	0	0	0	0
NC_022541	9895	CCGACAAGGC.GTTGGCCGCA	G	A	40	PASS	NA	GT	0	0	0	0	0	0	0	0	0	0	0	0	0	0	0	0	0	0	0	0	0	0	0	0	0	0	0	0	0	0	0	0	0	0	0	0	0	0	0	0	0
NC_022541	9896	CGACAAGGCG.TTGGCCGCAC	T	C	40	PASS	NA	GT	0	1	1	1	1	1	1	1	1	0	1	1	1	1	1	0	1	1	1	1	1	1	1	0	1	1	1	1	1	1	1	1	1	1	1	1	1	1	1	1	1
NC_022541	9898	ACAAGGCGTT.GGCCGCACAG	G	T	40	PASS	NA	GT	0	0	1	1	1	1	1	0	0	0	1	0	0	0	0	0	1	0	0	1	1	1	0	0	1	1	0	0	0	0	0	0	0	1	1	0	1	0	0	0	0
NC_022541	9901	AGGCGTTGGC.CGCACAGCTG	C	G	40	PASS	NA	GT	0	1	0	0	0	0	0	1	1	0	0	1	1	0	1	0	0	1	1	0	0	0	1	0	0	0	0	1	1	1	1	1	1	0	0	0	0	1	1	1	1
NC_022541	9904	CGTTGGCCGC.ACAGCTGGCT	A	C,G	40	PASS	NA	GT	0	1	2	2	2	2	2	1	1	0	2	1	1	2	1	0	2	1	1	2	2	2	1	0	2	2	2	1	1	1	1	1	1	2	2	2	2	1	1	1	1
NC_022541	9913	CACAGCTGGC.TGCCCAGGCC	T	C	40	PASS	NA	GT	0	1	1	1	1	1	1	1	1	0	1	1	1	1	1	0	1	1	1	1	1	1	1	0	1	1	1	1	1	1	1	1	1	1	1	1	1	1	1	1	1
NC_022541	9916	AGCTGGCTGC.CCAGGCCGCT	C	G	40	PASS	NA	GT	0	1	1	1	1	1	1	1	1	0	1	1	1	1	1	0	1	1	1	1	1	1	1	0	1	1	1	1	1	1	1	1	1	1	1	1	1	1	1	1	1
NC_022541	9919	TGGCTGCCCA.GGCCGCTTAC	G	C	40	PASS	NA	GT	0	0	0	0	0	0	0	0	0	0	0	0	0	0	0	0	0	0	0	0	0	0	0	0	0	0	0	0	0	0	0	0	0	0	0	0	0	0	0	0	0
NC_022541	9922	CTGCCCAGGC.CGCTTACAAC	C	T	40	PASS	NA	GT	0	1	1	1	1	1	1	1	1	0	1	1	1	1	1	0	1	1	1	1	1	1	1	0	1	1	1	1	1	1	1	1	1	1	1	1	1	1	1	1	1
NC_022541	9925	CCCAGGCCGC.TTACAACCTG	T	C	40	PASS	NA	GT	0	1	1	1	1	1	1	1	1	0	1	1	1	1	1	0	1	1	1	1	1	1	1	0	1	1	1	1	1	1	1	1	1	1	1	1	1	1	1	1	1
NC_022541	9935	TTACAACCTG.GACGACACCG	G	A	40	PASS	NA	GT	0	0	0	0	0	0	0	0	0	0	0	0	0	0	0	0	0	0	0	0	0	0	0	0	0	0	0	0	0	0	0	0	0	0	0	0	0	0	0	0	0
NC_022541	9936	TACAACCTGG.ACGACACCGC	A	G	40	PASS	NA	GT	0	0	0	0	0	0	0	0	0	0	0	0	0	0	0	0	0	0	0	0	0	0	0	0	0	0	0	0	0	0	0	0	0	0	0	0	0	0	0	0	0
NC_022541	9948	GACACCGCCG.GTGCCAAGAA	G	C	40	PASS	NA	GT	0	1	0	0	0	0	0	0	0	0	0	0	0	0	0	0	0	0	0	0	0	0	0	0	0	0	0	0	0	0	0	0	0	0	0	0	0	0	0	0	0
NC_022541	9961	CCAAGAAGTA.TCTGCAGCAG	T	C	40	PASS	NA	GT	0	1	1	1	1	1	1	1	1	0	1	1	1	1	1	0	1	1	1	1	1	1	1	0	1	1	1	1	1	1	1	1	1	1	1	1	1	1	1	1	1
NC_022541	10000	TGGACAACAA.CGGCCATTTC	C	T	40	PASS	NA	GT	0	0	0	0	0	0	0	0	0	0	0	0	0	0	0	0	0	0	0	0	0	0	0	0	0	0	0	0	0	0	0	0	0	0	0	0	0	0	0	0	0
NC_022541	10006	ACAACGGCCA.TTTCCAGTCG	T	G	40	PASS	NA	GT	0	1	1	1	1	1	1	0	0	0	1	0	0	1	0	0	1	0	0	1	1	1	0	0	1	1	1	0	0	0	0	0	0	1	1	1	1	0	0	0	0
NC_022541	10012	GCCATTTCCA.GTCGATGCTG	G	A	40	PASS	NA	GT	0	0	0	0	0	0	0	0	0	0	0	0	0	0	0	0	0	1	0	0	0	0	0	0	0	0	0	0	0	0	0	0	0	0	0	0	0	0	0	0	0
NC_022541	10060	ACCAGCAGGC.CGAGGGACTG	C	T	40	PASS	NA	GT	0	0	0	0	0	0	0	0	0	0	0	0	0	0	0	0	0	0	0	0	0	0	0	0	0	0	0	0	0	0	0	0	0	0	0	0	0	0	0	0	0
NC_022541	10066	AGGCCGAGGG.ACTGGCCACG	A	T,C	40	PASS	NA	GT	0	1	1	1	1	1	1	1	1	0	1	1	1	1	1	0	1	1	1	1	1	1	1	0	1	1	1	1	1	1	1	1	1	1	1	1	1	1	1	1	1
NC_022541	10067	GGCCGAGGGA.CTGGCCACGC	C	T	40	PASS	NA	GT	0	1	0	0	0	0	0	0	0	0	0	0	0	0	0	0	0	0	0	0	0	0	0	0	0	0	0	0	0	0	0	0	0	0	0	0	0	0	0	0	0
NC_022541	10071	GAGGGACTGG.CCACGCTGGA	C	T	40	PASS	NA	GT	0	0	0	0	0	0	0	0	0	0	0	0	0	1	0	0	0	0	0	0	0	0	0	0	0	0	1	0	0	0	0	0	0	0	0	1	0	0	0	0	0
NC_022541	10084	CGCTGGACAA.GTATCTGGAA	G	A	40	PASS	NA	GT	0	1	0	0	0	0	0	0	0	0	0	0	0	0	0	0	0	0	0	0	0	0	0	0	0	0	0	0	0	0	0	0	0	0	0	0	0	0	0	0	0
NC_022541	10093	AGTATCTGGA.AGAGAGCAAG	A	G	40	PASS	NA	GT	0	0	0	0	0	0	0	1	1	0	0	1	1	0	1	0	0	1	1	0	0	0	1	0	0	0	0	1	1	1	1	1	1	0	0	0	0	1	1	1	1
NC_022541	10108	GCAAGTCGCA.GCGTCCGGAA	G	A	40	PASS	NA	GT	0	0	0	0	0	0	0	1	1	0	0	0	0	0	1	0	0	0	1	0	0	0	1	0	0	0	0	1	1	1	1	1	0	0	0	0	0	1	1	1	1
NC_022541	10111	AGTCGCAGCG.TCCGGAAGAT	T	A	40	PASS	NA	GT	0	0	0	0	0	0	0	0	0	0	0	0	0	0	0	0	0	0	0	0	0	0	0	0	0	0	0	0	0	0	0	0	0	0	0	0	0	0	0	0	0
NC_022541	10120	GTCCGGAAGA.TCTGATCCTC	T	C	40	PASS	NA	GT	0	1	0	0	0	0	0	0	0	0	0	0	0	0	0	0	0	0	0	0	0	0	0	0	0	0	0	0	0	0	0	0	0	0	0	0	0	0	0	0	0
NC_022541	10132	TGATCCTCAA.GGGCCAGGCG	G	A	40	PASS	NA	GT	0	0	0	0	0	0	0	0	0	0	0	1	1	0	0	0	0	0	0	0	0	0	0	0	0	0	0	0	0	0	0	0	0	0	0	0	0	0	0	0	0
NC_022541	10144	GCCAGGCGCT.GTACCAGACC	G	C	40	PASS	NA	GT	0	0	0	0	0	0	0	0	0	0	0	0	0	0	0	0	0	0	0	0	0	0	0	0	0	0	0	0	0	0	0	0	0	0	0	0	0	0	0	0	0
NC_022541	10151	GCTGTACCAG.ACCGAGCGCT	A	G	40	PASS	NA	GT	0	0	0	0	0	0	0	0	0	0	0	0	0	0	0	0	0	0	0	0	0	0	0	0	0	0	0	0	0	0	0	0	0	0	0	0	0	0	0	0	0
NC_022541	10156	ACCAGACCGA.GCGCTACAAG	G	A	40	PASS	NA	GT	0	0	0	0	0	0	0	1	1	0	0	0	0	0	1	0	0	0	1	0	0	0	1	0	0	0	0	1	1	1	1	1	1	0	0	0	0	1	1	1	1
NC_022541	10171	ACAAGGAAGC.GATCCCGGTG	G	C	40	PASS	NA	GT	0	1	0	0	0	0	0	1	1	0	0	1	1	0	1	0	0	0	1	0	0	0	1	0	0	0	0	1	1	1	1	1	1	0	0	0	0	1	1	1	1
NC_022541	10174	AGGAAGCGAT.CCCGGTGTTG	C	T	40	PASS	NA	GT	0	1	0	0	0	0	0	0	0	0	0	0	0	0	0	0	0	0	0	0	0	0	0	0	0	0	0	0	0	0	0	0	0	0	0	0	0	0	0	0	0
NC_022541	10195	AGCAGGCCAT.CGCTGCCTCG	C	T	40	PASS	NA	GT	0	0	1	1	1	1	1	0	0	0	1	0	0	1	0	0	1	0	0	1	1	1	0	0	1	1	1	0	0	0	0	0	0	1	1	1	1	0	0	0	0
NC_022541	10198	AGGCCATCGC.TGCCTCGCCA	T	C	40	PASS	NA	GT	0	0	1	1	1	1	1	0	0	0	1	0	0	1	0	0	1	0	0	1	1	1	0	0	1	1	1	0	0	0	0	0	0	1	1	1	1	0	0	0	0
NC_022541	10201	CCATCGCTGC.CTCGCCAGAG	C	T,A	40	PASS	NA	GT	0	0	0	0	0	0	0	0	0	0	0	0	0	1	0	0	0	0	0	0	0	0	0	0	0	0	1	0	0	0	0	0	0	0	0	1	0	0	0	0	0
NC_022541	10205	CGCTGCCTCG.CCAGAGCCCA	C	T	40	PASS	NA	GT	0	0	0	0	0	0	0	0	0	0	0	0	0	0	0	0	0	0	0	0	0	0	0	0	0	0	0	0	0	0	0	0	0	0	0	0	0	0	0	0	0
NC_022541	10207	CTGCCTCGCC.AGAGCCCAAG	A	C	40	PASS	NA	GT	0	1	1	1	1	1	1	1	1	0	1	1	1	1	1	0	1	1	1	1	1	1	1	0	1	1	1	1	1	1	1	1	1	1	1	1	1	1	1	1	1
NC_022541	10222	CCAAGGACAG.TTGGAACCAG	T	C	40	PASS	NA	GT	0	1	1	1	1	1	1	1	1	0	1	1	1	1	1	0	1	1	1	1	1	1	1	0	1	1	1	1	1	1	1	1	1	1	1	1	1	1	1	1	1
NC_022541	10249	TGGCGTCCTA.CGCCGAAGCT	C	T	40	PASS	NA	GT	0	0	0	0	0	0	0	0	0	0	0	0	0	0	0	0	0	0	0	0	0	0	0	0	0	0	0	0	0	0	0	0	0	0	0	0	0	0	0	0	0
NC_022541	10270	GCCAGACCGG.CGAAGCCGTT	C	A,T	40	PASS	NA	GT	0	1	0	0	0	0	0	2	2	0	0	0	0	0	2	0	0	2	2	0	0	0	2	0	0	0	0	2	2	2	2	2	2	0	0	0	0	2	2	2	2
NC_022541	10273	AGACCGGCGA.AGCCGTTGCT	A	G	40	PASS	NA	GT	0	1	0	0	0	0	0	0	0	0	0	0	0	0	0	0	0	0	0	0	0	0	0	0	0	0	0	0	0	0	0	0	0	0	0	0	0	0	0	0	0
NC_022541	10282	AAGCCGTTGC.TGCCGCCGAG	T	G	40	PASS	NA	GT	0	1	0	0	0	0	0	1	1	0	0	1	1	0	1	0	0	1	1	0	0	0	1	0	0	0	0	1	1	1	1	1	1	0	0	0	0	1	1	1	1
NC_022541	10284	GCCGTTGCTG.CCGCCGAGGC	C	T	40	PASS	NA	GT	0	0	0	0	0	0	0	0	0	0	0	0	0	0	0	0	0	0	0	0	0	0	0	0	0	0	0	0	0	0	0	0	0	0	0	0	0	0	0	0	0
NC_022541	10285	CCGTTGCTGC.CGCCGAGGCG	C	T	40	PASS	NA	GT	0	0	0	0	0	0	0	0	0	0	0	0	0	1	0	0	0	0	0	0	0	0	0	0	0	0	1	0	0	0	0	0	0	0	0	1	0	0	0	0	0
NC_022541	10300	AGGCGCTGGC.CGCCAAGACG	C	G	40	PASS	NA	GT	0	0	0	0	0	0	0	0	0	0	0	0	0	0	0	0	0	1	0	0	0	0	0	0	0	0	0	0	0	0	0	0	0	0	0	0	0	0	0	0	0
NC_022541	10321	CCAACGACAA.AAAGGCGCAG	A	G	40	PASS	NA	GT	0	0	1	1	1	1	1	0	0	0	1	0	0	0	0	0	1	0	0	1	1	1	0	0	1	1	0	0	0	0	0	0	0	1	1	0	1	0	0	0	0
NC_022541	10324	ACGACAAAAA.GGCGCAGCTC	G	A	40	PASS	NA	GT	0	0	0	0	0	0	0	0	0	0	0	0	0	0	0	0	0	0	0	0	0	0	0	0	0	0	0	0	0	0	0	0	0	0	0	0	0	0	0	0	0
NC_022541	10327	ACAAAAAGGC.GCAGCTCAAC	G	T,C	40	PASS	NA	GT	0	0	1	1	1	1	1	2	2	0	1	2	2	1	2	0	1	2	2	1	1	1	2	0	1	1	1	2	2	2	2	2	2	1	1	1	1	2	2	2	2
NC_022541	10384	AGGCCGCAGG.CGTGATGGAC	C	G	40	PASS	NA	GT	0	0	1	1	1	1	1	0	0	0	1	0	0	1	0	0	1	0	0	1	1	1	0	0	1	1	1	0	0	0	0	0	0	1	1	1	1	0	0	0	0
NC_022541	10411	GTGCCTCCGG.TCAGTTGACC	T	C	40	PASS	NA	GT	0	1	0	0	0	0	0	0	0	0	0	0	0	0	0	0	0	0	0	0	0	0	0	0	0	0	0	0	0	0	0	0	0	0	0	0	0	0	0	0	0
NC_022541	10426	TGACCGAAGA.AAAGGAATAC	A	G	40	PASS	NA	GT	0	0	1	1	1	1	1	0	0	0	1	0	0	1	0	0	1	0	0	1	1	1	0	0	1	1	1	0	0	0	0	0	0	1	1	1	1	0	0	0	0
NC_022541	10438	AGGAATACAA.GCAGTTGTAT	G	A	40	PASS	NA	GT	0	0	1	1	1	1	1	0	0	0	1	0	0	1	0	0	1	0	0	1	1	1	0	0	1	1	1	0	0	0	0	0	0	1	1	1	1	0	0	0	0
NC_022541	10442	ATACAAGCAG.TTGTATTCCA	T	C	40	PASS	NA	GT	0	0	1	1	1	1	1	0	0	0	1	1	1	1	0	0	1	1	0	1	1	1	0	0	1	1	1	0	0	0	0	0	0	1	1	1	1	0	0	0	0
NC_022541	10489	AGGACGTCAT.CGCCGTCATC	C	T	40	PASS	NA	GT	0	1	0	0	0	0	0	0	0	0	0	0	0	0	0	0	0	0	0	0	0	0	0	0	0	0	0	0	0	0	0	0	0	0	0	0	0	0	0	0	0
NC_022541	10495	TCATCGCCGT.CATCAATGAG	C	G	40	PASS	NA	GT	0	0	0	0	0	0	0	0	0	0	0	0	0	0	0	0	0	0	0	0	0	0	0	0	0	0	0	0	0	0	0	0	0	0	0	0	0	0	0	0	0
NC_022541	10513	AGGGTATGCA.AAAAGGCATC	A	G,C	40	PASS	NA	GT	0	0	1	1	1	1	1	0	0	0	1	0	0	0	0	0	1	0	0	1	1	1	0	0	1	1	0	0	0	0	0	0	2	1	1	0	1	0	0	0	0
NC_022541	10531	TCCTCAAGCC.TGATTATCAG	T	G,C	40	PASS	NA	GT	0	0	1	1	1	1	1	0	0	0	1	0	0	1	0	0	1	0	0	1	1	1	0	0	1	1	1	0	0	0	0	0	0	1	1	1	1	0	0	0	0
NC_022541	10553	ATACCTTGCC.CTGGCCCAGT	C	T	40	PASS	NA	GT	0	0	0	0	0	0	0	0	0	0	0	0	0	0	0	0	0	0	0	0	0	0	0	0	0	0	0	0	0	0	0	0	0	0	0	0	0	0	0	0	0
NC_022541	10584	AGCGACGATG.TCCCGAAGGC	T	C	40	PASS	NA	GT	0	0	0	0	0	0	0	0	0	0	0	0	0	0	0	0	0	0	0	0	0	0	0	0	0	0	0	0	0	0	0	0	0	0	0	0	0	0	0	0	0
NC_022541	10585	GCGACGATGT.CCCGAAGGCG	C	A	40	PASS	NA	GT	0	0	1	1	1	1	1	1	1	0	1	1	1	1	1	0	1	1	1	1	1	1	1	0	1	1	1	1	1	1	1	1	1	1	1	1	1	1	1	1	1
NC_022541	10594	TCCCGAAGGC.GATCGAAAAC	G	A	40	PASS	NA	GT	0	0	0	0	0	0	0	0	0	0	0	0	1	0	0	0	0	0	0	0	0	0	0	0	0	0	0	0	0	0	0	0	0	0	0	0	0	0	0	0	0
NC_022541	10609	AAAACTGGCA.GAAGGCCGCA	G	A	40	PASS	NA	GT	0	0	0	0	0	0	0	0	0	0	0	1	1	0	0	0	0	0	0	0	0	0	0	0	0	0	0	0	0	0	0	0	0	0	0	0	0	0	0	0	0
NC_022541	10611	AACTGGCAGA.AGGCCGCACC	A	T	40	PASS	NA	GT	0	0	0	0	0	0	0	0	0	0	0	0	0	1	0	0	0	0	0	0	0	0	0	0	0	0	1	0	0	0	0	0	0	0	0	1	0	0	0	0	0
NC_022541	10801	GAAATCCCTG.TGTTTTTAGT	T	C	40	PASS	NA	GT	0	0	0	0	0	0	0	0	0	0	0	0	0	0	0	0	0	0	0	0	0	0	0	0	0	0	0	0	0	0	0	0	0	0	0	0	0	0	0	0	0
NC_022541	10820	TGGTTACAGG.ACTCGGGATT	A	C	40	PASS	NA	GT	0	0	0	0	0	0	0	1	1	0	0	0	0	0	1	0	0	0	1	0	0	0	1	0	0	0	0	1	1	1	1	1	1	0	0	0	0	1	1	1	1
NC_022541	10848	CTTGGGAGTT.CCTGCGGTGT	C	A	40	PASS	NA	GT	0	0	0	0	0	0	0	0	0	0	0	0	0	0	0	0	0	0	0	0	0	0	0	0	0	0	0	0	0	0	0	0	0	0	0	0	0	0	0	0	0
NC_022541	10889	GGATCATCAC.AGTGATCCGG	A	C	40	PASS	NA	GT	0	0	0	0	0	0	0	0	1	0	0	0	0	0	1	0	0	0	0	0	0	0	0	0	0	0	0	1	1	0	0	0	0	0	0	0	0	0	1	1	1
NC_022541	11608	ACGGGCCGGC.CACGGTCGGC	C	T	40	PASS	NA	GT	0	0	0	0	0	0	0	0	0	0	0	0	0	0	0	0	0	0	0	0	0	0	0	0	0	0	0	0	0	0	0	0	0	0	0	0	0	0	0	0	0
NC_022541	11757	TGGGCTTCGA.GCACTTGATC	G	A	40	PASS	NA	GT	0	0	0	0	0	0	0	0	0	0	0	0	0	0	0	0	0	0	0	0	0	0	0	0	0	0	0	0	0	0	0	0	0	0	0	0	0	0	0	0	0
NC_022541	11763	TCGAGCACTT.GATCACTGAA	G	A	40	PASS	NA	GT	0	0	0	0	0	0	0	0	0	0	0	0	0	0	0	0	0	0	0	0	0	0	0	0	0	0	0	0	0	0	0	0	0	0	0	0	0	0	0	0	0
NC_022541	11769	ACTTGATCAC.TGAAATGACC	T	C	40	PASS	NA	GT	0	1	1	1	1	1	1	1	1	0	1	1	1	0	1	0	1	1	1	1	1	1	1	0	1	1	0	1	1	1	1	1	1	1	1	0	1	1	1	1	1
NC_022541	11778	CTGAAATGAC.CTCCAGCCCC	C	T	40	PASS	NA	GT	0	0	1	1	1	1	1	1	1	0	1	0	0	0	1	0	1	0	1	1	1	1	1	0	1	1	0	1	1	1	1	1	1	1	1	0	1	1	1	1	1
NC_022541	11805	TCGCCGTGTC.CTGGGTCGTG	C	T	40	PASS	NA	GT	0	0	1	1	1	1	1	0	0	0	1	0	0	0	0	0	1	0	0	1	1	1	0	0	1	1	0	0	0	0	0	0	0	1	1	0	1	0	0	0	0
NC_022541	11830	CACCCTGATC.GCCATGTCCG	G	A	40	PASS	NA	GT	0	0	0	0	0	0	0	0	0	0	0	0	0	0	0	0	0	0	0	0	0	0	0	0	0	0	0	0	0	0	0	0	0	0	0	0	0	0	0	0	0
NC_022541	11847	CCGCTGCCTC.CTGGTACTGG	C	T	40	PASS	NA	GT	0	0	1	1	1	1	1	0	0	0	1	0	0	0	0	0	1	0	0	1	1	1	0	0	1	1	0	0	0	0	0	0	0	1	1	0	1	0	0	0	0
NC_022541	11859	GGTACTGGAC.CGTCATCAAC	C	T	40	PASS	NA	GT	0	1	0	0	0	0	0	1	1	0	0	1	1	0	1	0	0	1	1	0	0	0	1	0	0	0	0	1	1	1	1	1	1	0	0	0	0	1	1	1	1
NC_022541	11877	ACATCTTCCG.TGCCACCCGC	T	C	40	PASS	NA	GT	0	0	1	1	1	1	1	1	1	0	1	1	1	0	1	0	1	0	1	1	1	1	1	0	1	1	0	1	1	1	1	1	1	1	1	0	1	1	1	1	1
NC_022541	11886	GTGCCACCCG.CCTGAAGAGC	C	T	40	PASS	NA	GT	0	0	0	0	0	0	0	0	0	0	0	0	0	0	0	0	0	0	0	0	0	0	0	0	0	0	0	0	0	0	0	0	0	0	0	0	0	0	0	0	0
NC_022541	11887	TGCCACCCGC.CTGAAGAGCG	C	G,T	40	PASS	NA	GT	0	0	1	0	1	1	1	0	0	0	0	0	0	0	0	0	0	0	0	0	0	1	0	0	0	0	0	0	0	0	0	0	0	1	0	0	0	0	0	0	0
NC_022541	11919	TCACCACCGC.GTTCTGGGAT	G	T	40	PASS	NA	GT	0	0	0	0	0	0	0	0	0	0	0	0	0	1	0	0	0	0	0	0	0	0	0	0	0	0	1	0	0	0	0	0	0	0	0	1	0	0	0	0	0
NC_022541	11928	CGTTCTGGGA.TGCCCCGAAT	T	C	40	PASS	NA	GT	0	0	1	1	1	1	1	0	0	0	1	0	0	0	0	0	1	0	0	1	1	1	0	0	1	1	0	0	0	0	0	0	0	1	1	0	1	0	0	0	0
NC_022541	11935	GGATGCCCCG.AATGCACAGG	A	C	40	PASS	NA	GT	0	0	0	0	0	0	0	0	0	0	0	0	0	0	0	0	0	0	0	0	0	0	0	0	0	0	0	0	0	0	0	0	0	0	0	0	0	0	0	0	0
NC_022541	11966	GCCATGGAAG.AACAGCCGGC	A	C	40	PASS	NA	GT	0	0	0	0	0	0	0	0	0	0	0	0	0	0	0	0	0	0	0	0	0	0	0	0	0	0	0	0	0	0	0	0	0	0	0	0	0	0	0	0	0
NC_022541	11967	CCATGGAAGA.ACAGCCGGCT	A	G	40	PASS	NA	GT	0	0	1	1	1	1	1	0	0	0	1	0	0	0	0	0	1	0	0	1	1	1	0	0	1	1	0	0	0	0	0	0	0	1	1	0	1	0	0	0	0
NC_022541	11969	ATGGAAGAAC.AGCCGGCTTC	A	G	40	PASS	NA	GT	0	0	0	0	0	0	0	0	0	0	0	0	0	0	0	0	0	0	0	0	0	0	0	0	0	0	0	0	0	0	0	0	0	0	0	1	0	0	0	0	0
NC_022541	11988	CCGAGCCGTT.CTCGAAGATC	C	T	40	PASS	NA	GT	0	0	0	0	0	0	0	0	0	0	0	0	0	0	0	0	0	0	0	0	0	0	0	0	0	0	0	0	0	0	0	0	0	0	0	0	0	0	0	0	0
NC_022541	11991	AGCCGTTCTC.GAAGATCGCG	G	C	40	PASS	NA	GT	0	0	0	0	0	0	0	1	1	0	0	1	1	0	1	0	0	1	1	0	0	0	1	0	0	0	0	1	1	1	1	1	1	0	0	0	0	1	1	1	1
NC_022541	12000	CGAAGATCGC.GCTGGACGCC	G	A	40	PASS	NA	GT	0	0	1	1	1	1	1	1	1	0	1	1	1	0	1	0	1	1	1	1	1	1	1	0	1	1	0	1	1	1	1	1	1	1	1	0	1	1	1	1	1
NC_022541	12001	GAAGATCGCG.CTGGACGCCG	C	T	40	PASS	NA	GT	0	0	0	0	0	0	0	0	0	0	0	0	0	0	0	0	0	1	0	0	0	0	0	0	0	0	0	0	0	0	0	0	1	0	0	0	0	0	0	0	0
NC_022541	12009	CGCTGGACGC.CGCCCAGGCT	C	G,T,A	40	PASS	NA	GT	0	1	2	2	2	2	2	3	3	0	2	3	3	0	3	0	2	3	3	2	2	2	3	0	2	2	0	3	3	3	3	3	3	2	2	0	2	3	3	3	3
NC_022541	12018	CCGCCCAGGC.TGCTGCGCAC	T	G	40	PASS	NA	GT	0	0	1	1	1	1	1	0	0	0	1	0	0	0	0	0	1	0	0	1	1	1	0	0	1	1	0	0	0	0	0	0	0	1	1	0	1	0	0	0	0
NC_022541	12021	CCCAGGCTGC.TGCGCACCAC	T	C	40	PASS	NA	GT	0	0	0	0	0	0	0	0	0	0	0	1	1	0	0	0	0	0	0	0	0	0	0	0	0	0	0	0	0	0	0	0	0	0	0	0	0	0	0	0	0
NC_022541	12036	ACCACCAGCG.TGCCGAAGGC	T	C	40	PASS	NA	GT	0	0	0	0	0	0	0	1	1	0	0	1	1	0	1	0	0	1	1	0	0	0	1	0	0	0	0	1	1	1	1	1	1	0	0	0	0	1	1	1	1
NC_022541	12039	ACCAGCGTGC.CGAAGGCAGC	C	A	40	PASS	NA	GT	0	0	0	0	0	0	0	0	0	0	0	0	0	0	0	0	0	0	0	0	0	0	0	0	0	0	0	0	0	0	0	0	0	0	0	0	0	0	0	0	0
NC_022541	12068	CTGGGCGAGA.GCCTGAGCCG	G	A	40	PASS	NA	GT	0	0	0	0	0	0	0	0	0	0	0	0	0	0	0	0	0	0	0	0	0	0	0	0	0	0	0	0	0	0	0	0	1	0	0	0	0	0	0	0	0
NC_022541	12111	TGCGTCAGGC.CGTGACCCGC	C	T	40	PASS	NA	GT	0	0	0	0	0	0	0	0	0	0	0	0	0	0	0	0	0	0	0	0	0	0	0	0	0	0	0	0	0	0	0	0	1	0	0	0	0	0	0	0	0
NC_022541	12114	GTCAGGCCGT.GACCCGCGAA	G	A	40	PASS	NA	GT	0	0	0	0	0	0	0	0	0	0	0	0	0	0	0	0	0	0	0	0	0	0	0	0	0	0	0	0	0	0	0	0	0	0	0	0	0	0	0	0	0
NC_022541	12135	GCACCAAGCT.CCAGTCGGGC	C	G	40	PASS	NA	GT	0	1	1	1	1	1	1	1	1	0	1	1	1	0	1	0	1	1	1	1	1	1	1	0	1	1	0	1	1	1	1	1	1	1	1	0	1	1	1	1	1
NC_022541	12151	GGGCATGACC.CTGCTGGCCA	C	T	40	PASS	NA	GT	0	0	0	0	0	0	0	1	1	0	0	1	1	0	1	0	0	1	1	0	0	0	1	0	0	0	0	1	1	1	1	1	1	0	0	0	0	1	1	1	1
NC_022541	12156	TGACCCTGCT.GGCCACCGTC	G	T	40	PASS	NA	GT	0	0	0	0	0	0	0	0	0	0	0	0	0	0	0	0	0	0	0	0	0	0	0	0	0	0	0	0	0	0	0	0	0	0	0	0	0	0	0	0	0
NC_022541	12171	CCGTCGGTGC.GACCGCACCG	G	A	40	PASS	NA	GT	0	0	0	0	0	0	0	0	0	0	0	0	0	0	0	0	0	0	0	0	0	0	0	0	0	0	0	0	0	0	0	0	0	0	0	0	0	0	0	0	0
NC_022541	12177	GTGCGACCGC.ACCGTTCGTC	A	G	40	PASS	NA	GT	0	1	1	1	1	1	1	1	1	0	1	1	1	0	1	0	1	1	1	1	1	1	1	0	1	1	0	1	1	1	1	1	1	1	1	0	1	1	1	1	1
NC_022541	12198	GTCTGCTCGG.TACCGTGTGG	T	C	40	PASS	NA	GT	0	0	0	0	0	0	0	1	1	0	0	1	1	0	1	0	0	1	1	0	0	0	1	0	0	0	0	1	1	1	1	1	1	0	0	0	0	1	1	1	1
NC_022541	12219	GCATCTACGG.CGCGCTGATC	C	T	40	PASS	NA	GT	0	1	0	0	0	0	0	0	0	0	0	0	0	0	0	0	0	0	0	0	0	0	0	0	0	0	0	0	0	0	0	0	0	0	0	0	0	0	0	0	0
NC_022541	12240	AGATCGGTGC.AACCGGTTCG	A	G	40	PASS	NA	GT	0	1	0	0	0	0	0	0	0	0	0	0	0	0	0	0	0	0	0	0	0	0	0	0	0	0	0	0	0	0	0	0	0	0	0	0	0	0	0	0	0
NC_022541	12270	ACGCCGTTGC.CGGCCCGGTG	C	T	40	PASS	NA	GT	0	0	0	0	0	0	0	0	0	0	0	0	0	0	0	0	0	0	0	0	0	0	0	0	0	0	0	0	0	0	0	0	0	0	0	0	0	0	0	0	0
NC_022541	12273	CCGTTGCCGG.CCCGGTGGGT	C	T	40	PASS	NA	GT	0	1	0	0	0	0	0	0	0	0	0	0	0	0	0	0	0	0	0	0	0	0	0	0	0	0	0	0	0	0	0	0	0	0	0	0	0	0	0	0	0
NC_022541	12321	TGTTCGTCGC.GATCCCGGCC	G	A,T	40	PASS	NA	GT	0	1	2	2	2	2	2	0	0	0	2	0	0	2	0	0	2	0	0	2	2	2	0	0	2	2	2	0	0	0	0	0	0	2	2	2	2	0	0	0	0
NC_022541	12324	TCGTCGCGAT.CCCGGCCGTG	C	T	40	PASS	NA	GT	0	0	0	0	0	0	0	0	0	0	0	0	0	0	0	0	0	0	0	0	0	0	0	0	0	0	0	0	0	0	0	0	0	0	0	0	0	0	0	0	0
NC_022541	12357	TCTTCTCCAA.GGTCAACAGC	G	A	40	PASS	NA	GT	0	0	1	0	1	1	1	0	0	0	0	0	0	0	0	0	0	0	0	0	0	1	0	0	0	0	0	0	0	0	0	0	0	1	0	0	0	0	0	0	0
NC_022541	12360	TCTCCAAGGT.CAACAGCTCG	C	A	40	PASS	NA	GT	0	0	0	0	0	0	0	0	0	0	0	0	0	0	0	0	0	1	0	0	0	0	0	0	0	0	0	0	0	0	0	0	0	0	0	0	0	0	0	0	0
NC_022541	12363	CCAAGGTCAA.CAGCTCGGTG	C	T	40	PASS	NA	GT	0	0	0	0	0	0	0	0	0	0	0	0	0	0	0	0	0	0	0	0	0	0	0	0	0	0	0	0	0	0	0	0	0	0	0	0	0	0	0	0	0
NC_022541	12387	CCAAGTTCGA.CACCTTCGCC	C	T	40	PASS	NA	GT	0	0	0	0	0	0	0	1	1	0	0	0	0	0	1	0	0	0	1	0	0	0	1	0	0	0	0	1	1	1	1	1	0	0	0	0	0	1	1	1	1
NC_022541	12388	CAAGTTCGAC.ACCTTCGCCC	A	T	40	PASS	NA	GT	0	0	0	0	0	0	0	0	0	0	0	0	0	0	0	0	0	0	0	0	0	0	0	0	0	0	0	0	0	0	0	0	0	0	0	0	0	0	0	0	0
NC_022541	12393	TCGACACCTT.CGCCCACGAC	C	T	40	PASS	NA	GT	0	1	0	0	0	0	0	0	0	0	0	0	0	0	0	0	0	0	0	0	0	0	0	0	0	0	0	0	0	0	0	0	0	0	0	0	0	0	0	0	0
NC_022541	12396	ACACCTTCGC.CCACGACCTG	C	T	40	PASS	NA	GT	0	0	1	1	1	1	1	0	0	0	1	0	0	1	0	0	1	0	0	1	1	1	0	0	1	1	1	0	0	0	0	0	0	1	1	1	1	0	0	0	0
NC_022541	12417	ACGACTTCTT.CGCCACCGGT	C	T	40	PASS	NA	GT	0	0	0	0	0	0	0	0	0	0	0	0	0	0	0	0	0	0	0	0	0	0	0	0	0	0	0	0	0	0	0	0	0	0	0	0	0	0	0	0	0
NC_022541	12547	TGACGCCCCT.CGTAGACGTC	C	G	40	PASS	NA	GT	0	0	1	1	1	1	1	0	0	0	1	0	0	1	0	0	1	0	0	1	1	1	0	0	1	1	1	0	0	0	0	0	0	1	1	1	1	0	0	0	0
NC_022541	12550	CGCCCCTCGT.AGACGTCATG	A	G	40	PASS	NA	GT	0	1	1	1	1	1	1	1	1	0	1	1	1	1	1	0	1	1	1	1	1	1	1	0	1	1	1	1	1	1	1	1	1	1	1	1	1	1	1	1	1
NC_022541	12556	TCGTAGACGT.CATGCTGGTG	C	G	40	PASS	NA	GT	0	0	0	0	0	0	0	1	1	0	0	1	1	0	1	0	0	1	1	0	0	0	1	0	0	0	0	1	1	1	1	1	1	0	0	0	0	1	1	1	1
NC_022541	12560	AGACGTCATG.CTGGTGCTGC	C	T	40	PASS	NA	GT	0	0	0	0	0	0	0	1	1	0	0	1	1	0	1	0	0	1	1	0	0	0	1	0	0	0	0	1	1	1	1	1	1	0	0	0	0	1	1	1	1
NC_022541	12643	CCAACTTGAT.CCAGAAGGAA	C	T	40	PASS	NA	GT	0	0	1	1	1	1	1	0	0	0	1	0	0	0	0	0	1	0	0	1	1	1	0	0	1	1	0	0	0	0	0	0	0	1	1	0	1	0	0	0	0
NC_022541	12667	CGGAGAAACG.CGCCGCGCCG	C	T	40	PASS	NA	GT	0	0	0	0	0	0	0	1	1	0	0	1	1	0	1	0	0	1	1	0	0	0	1	0	0	0	0	1	1	1	1	1	1	0	0	0	0	1	1	1	1
NC_022541	12679	CCGCGCCGAT.CACTCTGGCC	C	T	40	PASS	NA	GT	0	0	0	0	0	0	0	0	0	0	0	0	0	0	0	0	0	0	0	0	0	0	0	0	0	0	0	0	0	0	0	0	0	0	0	0	0	0	0	0	0
NC_022541	12700	TCAAGGAAGA.TGGGTCGCTG	T	C	40	PASS	NA	GT	0	0	0	0	0	0	0	0	0	0	0	0	0	0	0	0	0	0	0	0	0	0	0	0	0	0	0	0	0	0	0	0	0	0	0	0	0	0	0	0	0
NC_022541	12730	ACGAGCCGAT.TTCCAAGGAA	T	C	40	PASS	NA	GT	0	0	1	1	1	1	1	0	0	0	1	0	0	1	0	0	1	0	0	1	1	1	0	0	1	1	1	0	0	0	0	0	0	1	1	1	1	0	0	0	0
NC_022541	12739	TTTCCAAGGA.AGCCCTGGAG	A	G	40	PASS	NA	GT	0	0	0	0	0	0	0	0	0	0	0	0	0	0	0	0	0	0	0	0	0	0	0	0	0	0	0	0	0	0	0	0	0	0	0	0	0	0	0	0	0
NC_022541	12745	AGGAAGCCCT.GGAGTCGCGC	G	T	40	PASS	NA	GT	0	0	0	0	0	0	0	0	0	0	0	0	0	0	0	0	0	0	0	0	0	0	0	0	0	0	0	0	0	0	0	0	0	0	0	0	0	0	0	0	0
NC_022541	12763	GCCTGTCCAC.CGCCGCACAG	C	A	40	PASS	NA	GT	0	0	0	0	0	0	0	0	0	0	0	0	0	0	0	0	0	0	0	0	0	0	0	0	0	0	0	0	0	0	0	0	0	0	0	0	0	0	0	0	0
NC_022541	12766	TGTCCACCGC.CGCACAGCAG	C	T	40	PASS	NA	GT	0	1	1	1	1	1	1	0	0	0	1	0	0	1	0	0	1	0	0	1	1	1	0	0	1	1	1	0	0	0	0	0	0	1	1	1	1	0	0	0	0
NC_022541	12778	CACAGCAGAC.CCCGCAGCCG	C	A	40	PASS	NA	GT	0	1	0	0	0	0	0	0	0	0	0	0	0	0	0	0	0	0	0	0	0	0	0	0	0	0	0	0	0	0	0	0	0	0	0	0	0	0	0	0	0
NC_022541	12967	TCAACGTCAC.GCCCCTGGTG	G	A	40	PASS	NA	GT	0	0	0	0	0	0	0	0	0	0	0	0	0	0	0	0	0	0	0	0	0	0	0	0	0	0	0	0	0	0	0	0	0	0	0	0	0	0	0	0	0
NC_022541	12973	TCACGCCCCT.GGTGGACGTG	G	C	40	PASS	NA	GT	0	1	0	0	0	0	0	0	0	0	0	0	0	1	0	0	0	0	0	0	0	0	0	0	0	0	1	0	0	0	0	0	0	0	0	1	0	0	0	0	0
NC_022541	13012	TCTTCATCGT.CACCGCGCCG	C	G	40	PASS	NA	GT	0	0	1	1	1	1	1	0	0	0	1	0	0	1	0	0	1	0	0	1	1	1	0	0	1	1	1	0	0	0	0	0	0	1	1	1	1	0	0	0	0
NC_022541	13033	TCATGACCTA.CCCGATCGCC	C	T	40	PASS	NA	GT	0	0	0	0	0	0	0	0	0	0	0	0	0	0	0	0	0	0	0	0	0	0	0	0	0	0	0	0	0	0	0	0	1	0	0	0	0	0	0	0	0
NC_022541	13090	AGACGACCGA.ACCGCCGCCG	A	G	40	PASS	NA	GT	0	0	0	0	0	0	0	0	0	0	0	0	0	1	0	0	0	0	0	0	0	0	0	0	0	0	1	0	0	0	0	0	0	0	0	1	0	0	0	0	0
NC_022541	13150	GGAACAACAG.CCCGACTCCG	C	T	40	PASS	NA	GT	0	0	0	0	0	0	0	0	0	0	0	0	0	0	0	0	0	1	0	0	0	0	0	0	0	0	0	0	0	0	0	0	0	0	0	0	0	0	0	0	0
NC_022541	13153	ACAACAGCCC.GACTCCGGTC	G	A	40	PASS	NA	GT	0	0	0	0	0	0	0	0	0	0	0	0	0	0	0	0	0	0	0	0	0	0	0	0	0	0	0	0	0	0	0	0	0	0	0	0	0	0	0	0	0
NC_022541	13156	ACAGCCCGAC.TCCGGTCGAT	T	G	40	PASS	NA	GT	0	0	1	1	1	1	1	0	0	0	1	0	0	1	0	0	1	0	0	1	1	1	0	0	1	1	1	0	0	0	0	0	0	1	1	1	1	0	0	0	0
NC_022541	13165	CTCCGGTCGA.TGTGTTGCAA	T	C	40	PASS	NA	GT	0	0	1	1	1	1	1	0	0	0	1	0	0	1	0	0	1	0	0	1	1	1	0	0	1	1	1	0	0	0	0	0	0	1	1	1	1	0	0	0	0
NC_022541	13166	TCCGGTCGAT.GTGTTGCAAC	G	T	40	PASS	NA	GT	0	0	0	0	0	0	0	0	0	0	0	0	0	0	0	0	0	0	0	0	0	0	0	0	0	0	0	0	0	0	0	0	0	0	0	0	0	0	0	0	0
NC_022541	13213	ATCCGACCAA.CCAGCCGGAA	C	T	40	PASS	NA	GT	0	1	1	1	1	1	1	1	1	0	1	1	1	0	1	0	1	1	1	1	1	1	1	0	1	1	0	1	1	1	1	1	1	1	1	0	1	1	1	1	1
NC_022541	13219	CCAACCAGCC.GGAACTGCGC	G	A	40	PASS	NA	GT	0	0	0	0	0	0	0	0	0	0	0	0	0	0	0	0	0	0	0	0	0	0	0	0	0	0	0	0	0	0	0	0	0	0	0	0	0	0	0	0	0
NC_022541	13240	TCGATGCAAA.CCCGGATGCG	C	T	40	PASS	NA	GT	0	1	1	1	1	1	1	1	1	0	1	1	1	1	1	0	1	1	1	1	1	1	1	0	1	1	1	1	1	1	1	1	1	1	1	1	1	1	1	1	1
NC_022541	13243	ATGCAAACCC.GGATGCGGAG	G	A	40	PASS	NA	GT	0	0	1	1	1	1	1	0	0	0	1	0	0	1	0	0	1	0	0	1	1	1	0	0	1	1	1	0	0	0	0	0	0	1	1	1	1	0	0	0	0
NC_022541	13279	AGGTGCTGGC.CGCTGCGAAG	C	G	40	PASS	NA	GT	0	0	0	0	0	0	0	0	0	0	0	0	0	0	0	0	0	0	0	0	0	0	0	0	0	0	0	0	0	0	0	0	0	0	0	0	0	0	0	0	0
NC_022541	13294	CGAAGAACTC.GCAGATGAAG	G	C	40	PASS	NA	GT	0	0	1	1	1	1	1	0	0	0	1	0	0	0	0	0	1	0	0	1	1	1	0	0	1	1	0	0	0	0	0	0	0	1	1	0	1	0	0	0	0
NC_022541	13332	CAGTAAACGT.ATCTGCAAGA	A	C	40	PASS	NA	GT	0	0	0	0	0	0	0	0	0	0	0	0	0	0	0	0	0	0	0	0	0	0	0	0	0	0	0	0	0	0	0	0	0	0	0	0	0	0	0	0	0
NC_022541	13340	GTATCTGCAA.GACCGCAACA	G	C	40	PASS	NA	GT	0	0	0	0	0	0	0	0	0	0	0	0	0	1	0	0	0	0	0	0	0	0	0	0	0	0	1	0	0	0	0	0	0	0	0	1	0	0	0	0	0
NC_022541	15251	CTGAGCTGGG.CGGTCATGCG	C	T	40	PASS	NA	GT	0	1	1	1	1	1	1	1	1	0	1	1	1	1	1	0	1	1	1	1	1	1	1	0	1	1	1	1	1	1	1	1	1	1	1	1	1	1	1	1	1
NC_022541	15254	AGCTGGGCGG.TCATGCGGCG	T	C	40	PASS	NA	GT	0	0	0	0	0	0	0	0	0	0	0	0	0	0	0	0	0	0	0	0	0	0	0	0	0	0	0	0	0	0	0	0	0	0	0	0	0	0	0	0	0
NC_022541	15262	GGTCATGCGG.CGATCAGGCC	C	T	40	PASS	NA	GT	0	1	1	1	1	1	1	0	0	0	1	0	0	1	0	0	1	0	0	1	1	1	0	0	1	1	1	0	0	0	0	0	0	1	1	1	1	0	0	0	0
NC_022541	15286	GCTCGCTGTC.GCGTGCGGCG	G	A	40	PASS	NA	GT	0	1	0	0	0	0	0	0	0	0	0	0	0	0	0	0	0	0	0	0	0	0	0	0	0	0	0	0	0	0	0	0	0	0	0	0	0	0	0	0	0
NC_022541	15292	TGTCGCGTGC.GGCGGCCAGG	G	A	40	PASS	NA	GT	0	0	0	0	0	0	0	0	0	0	0	0	0	0	0	0	0	0	0	0	0	0	0	0	0	0	0	0	0	0	0	0	0	0	0	0	0	0	0	0	0
NC_022541	15295	CGCGTGCGGC.GGCCAGGGCG	G	C	40	PASS	NA	GT	0	0	0	0	0	0	0	0	0	0	0	0	0	0	0	0	0	0	0	0	0	0	0	0	0	0	0	0	0	0	0	0	0	0	0	0	0	0	0	0	0
NC_022541	15304	CGGCCAGGGC.GGCCGACTTG	G	A	40	PASS	NA	GT	0	0	0	0	0	0	0	1	1	0	0	1	1	0	1	0	0	1	1	0	0	0	1	0	0	0	0	1	1	1	1	1	1	0	0	0	0	1	1	1	1
NC_022541	15310	GGGCGGCCGA.CTTGCGTGCT	C	T	40	PASS	NA	GT	0	0	0	0	0	0	0	0	0	0	0	0	0	0	0	0	0	0	0	0	0	0	0	0	0	0	0	0	0	0	0	0	0	0	0	0	0	0	0	0	0
NC_022541	15313	CGGCCGACTT.GCGTGCTTCT	G	A	40	PASS	NA	GT	0	0	0	0	0	0	0	0	0	0	0	0	0	0	0	0	0	0	0	0	0	0	0	0	0	0	0	0	0	0	0	0	0	0	0	0	0	0	0	0	0
NC_022541	15316	CCGACTTGCG.TGCTTCTGCC	T	C	40	PASS	NA	GT	0	0	0	0	0	0	0	0	0	0	0	0	0	0	0	0	0	0	0	0	0	0	0	0	0	0	0	0	0	0	0	0	0	0	0	0	0	0	0	0	0
NC_022541	15349	GGCGCAGCTC.GGCCGGGTCG	G	A	40	PASS	NA	GT	0	0	0	0	0	0	0	0	0	0	0	0	0	0	0	0	0	0	0	0	0	0	0	0	0	0	0	0	0	0	0	0	0	0	0	0	0	0	0	0	0
NC_022541	15355	GCTCGGCCGG.GTCGATCATG	G	A	40	PASS	NA	GT	0	0	0	0	0	0	0	0	0	0	0	0	0	0	0	0	0	0	0	0	0	0	0	0	0	0	0	0	0	0	0	0	0	0	0	0	0	0	0	0	0
NC_022541	15379	TGGTATCGCG.TTGGGTGTCA	T	C	40	PASS	NA	GT	0	0	1	1	1	1	1	0	0	0	1	0	0	1	0	0	1	0	0	1	1	1	0	0	1	1	1	0	0	0	0	0	0	1	1	1	1	0	0	0	0
NC_022541	15388	GTTGGGTGTC.ACCCATGCGC	A	G	40	PASS	NA	GT	0	1	1	1	1	1	1	1	1	0	1	1	1	1	1	0	1	1	1	1	1	1	1	0	1	1	1	1	1	1	1	1	1	1	1	1	1	1	1	1	1
NC_022541	15409	AGGCGAACCA.ACCGCGCGTC	A	G	40	PASS	NA	GT	0	0	1	1	1	1	1	0	0	0	1	0	0	1	0	0	1	0	0	1	1	1	0	0	1	1	1	0	0	0	0	0	0	1	1	1	1	0	0	0	0
NC_022541	15423	CGCGTCCACA.ACAGCAGCAG	A	G	40	PASS	NA	GT	0	0	0	0	0	0	0	1	1	0	0	0	0	0	1	0	0	0	1	0	0	0	1	0	0	0	0	1	1	1	1	1	0	0	0	0	0	1	1	1	1
NC_022541	15426	GTCCACAACA.GCAGCAGCAG	G	A	40	PASS	NA	GT	0	0	0	0	0	0	0	0	0	0	0	0	0	0	0	0	0	0	0	0	0	0	0	0	0	0	0	0	0	0	0	0	0	0	0	0	0	0	0	0	0
NC_022541	15432	AACAGCAGCA.GCAGCAACGC	G	A	40	PASS	NA	GT	0	0	0	0	0	0	0	0	0	0	0	0	0	0	0	0	0	0	0	0	0	0	0	0	0	0	0	0	0	0	0	0	0	0	0	0	0	0	0	0	0
NC_022541	15435	AGCAGCAGCA.GCAACGCCAC	G	C,A	40	PASS	NA	GT	0	1	2	2	2	2	2	0	0	0	2	0	0	2	0	0	2	0	0	2	2	2	0	0	2	2	2	0	0	0	0	0	0	2	2	2	2	0	0	0	0
NC_022541	15442	GCAGCAACGC.CACCAGCAGC	C	T	40	PASS	NA	GT	0	0	0	0	0	0	0	0	0	0	0	0	0	0	0	0	0	1	0	0	0	0	0	0	0	0	0	0	0	0	0	0	0	0	0	0	0	0	0	0	0
NC_022541	15445	GCAACGCCAC.CAGCAGCGAG	C	T	40	PASS	NA	GT	0	0	1	1	1	1	1	0	0	0	1	0	0	0	0	0	1	0	0	1	1	1	0	0	1	1	0	0	0	0	0	0	0	1	1	0	1	0	0	0	0
NC_022541	15454	CCAGCAGCGA.GGCCACCAGC	G	A	40	PASS	NA	GT	0	0	1	1	1	1	1	0	0	0	1	0	0	1	0	0	1	0	0	1	1	1	0	0	1	1	1	0	0	0	0	0	0	1	1	1	1	0	0	0	0
NC_022541	15455	CAGCAGCGAG.GCCACCAGCA	G	A	40	PASS	NA	GT	0	1	1	1	1	1	1	0	0	0	1	0	0	1	0	0	1	0	0	1	1	1	0	0	1	1	1	0	0	0	0	0	0	1	1	1	1	0	0	0	0
NC_022541	15481	CGTGCGGCGT.ACTGAAGGCC	A	G	40	PASS	NA	GT	0	1	1	1	1	1	1	0	0	0	1	0	0	1	0	0	1	0	0	1	1	1	0	0	1	1	1	0	0	0	0	0	0	1	1	1	1	0	0	0	0
NC_022541	15487	GCGTACTGAA.GGCCAGCACC	G	A	40	PASS	NA	GT	0	1	1	1	1	1	1	0	0	0	1	0	0	1	0	0	1	0	0	1	1	1	0	0	1	1	1	0	0	0	0	0	0	1	1	1	1	0	0	0	0
NC_022541	15510	GCACCCAGTG.CCATAAGCAG	C	A	40	PASS	NA	GT	0	0	0	0	0	0	0	0	0	0	0	0	0	1	0	0	0	0	0	0	0	0	0	0	0	0	1	0	0	0	0	0	0	0	0	1	0	0	0	0	0
NC_022541	15539	GTGCATGACG.AGCTCCCCGT	A	C	40	PASS	NA	GT	0	1	0	0	0	0	0	0	0	0	0	0	0	0	0	0	0	0	0	0	0	0	0	0	0	0	0	0	0	0	0	0	0	0	0	0	0	0	0	0	0
NC_022541	15550	GCTCCCCGTT.GAGTGGCGGC	G	C	40	PASS	NA	GT	0	0	1	1	1	1	1	0	0	0	1	0	0	1	0	0	1	0	0	1	1	1	0	0	1	1	1	0	0	0	0	0	0	1	1	1	1	0	0	0	0
NC_022541	15573	GTAGCGCCGC.GCCCGGCGCG	G	A	40	PASS	NA	GT	0	0	1	1	1	1	1	0	0	0	1	0	0	1	0	0	1	0	0	1	1	1	0	0	1	1	1	0	0	0	0	0	0	1	1	1	1	0	0	0	0
NC_022541	15599	CGTGGGCACC.GTGCCGTTGG	G	T	40	PASS	NA	GT	0	1	0	0	0	0	0	0	0	0	0	0	0	0	0	0	0	0	0	0	0	0	0	0	0	0	0	0	0	0	0	0	0	0	0	0	0	0	0	0	0
NC_022541	15600	GTGGGCACCG.TGCCGTTGGT	T	C	40	PASS	NA	GT	0	1	1	1	1	1	1	1	1	0	1	1	1	1	1	0	1	1	1	1	1	1	1	0	1	1	1	1	1	1	1	1	1	1	1	1	1	1	1	1	1
NC_022541	15601	TGGGCACCGT.GCCGTTGGTC	G	A	40	PASS	NA	GT	0	1	0	0	0	0	0	1	1	0	0	1	1	0	1	0	0	1	1	0	0	0	1	0	0	0	0	1	1	1	1	1	1	0	0	0	0	1	1	1	1
NC_022541	15610	TGCCGTTGGT.CAGAGCAGCG	C	T	40	PASS	NA	GT	0	0	1	1	1	1	1	0	0	0	1	0	0	0	0	0	1	0	0	1	1	1	0	0	1	1	0	0	0	0	0	0	0	1	1	0	1	0	0	0	0
NC_022541	15618	GTCAGAGCAG.CGGCGACAGC	C	T	40	PASS	NA	GT	0	0	1	1	1	1	1	0	0	0	1	0	0	0	0	0	1	0	0	1	1	1	0	0	1	1	0	0	0	0	0	0	0	1	1	0	1	0	0	0	0
NC_022541	15626	AGCGGCGACA.GCAGCCGGGC	G	A	40	PASS	NA	GT	0	1	0	0	0	0	0	0	0	0	0	0	0	0	0	0	0	0	0	0	0	0	0	0	0	0	0	0	0	0	0	0	0	0	0	0	0	0	0	0	0
NC_022541	15632	GACAGCAGCC.GGGCAAAGGC	G	T	40	PASS	NA	GT	0	0	1	1	1	1	1	0	0	0	1	0	0	1	0	0	1	0	0	1	1	1	0	0	1	1	1	0	0	0	0	0	0	1	1	1	1	0	0	0	0
NC_022541	15636	GCAGCCGGGC.AAAGGCTTCC	A	G	40	PASS	NA	GT	0	1	1	1	1	1	1	0	0	0	1	0	0	1	0	0	1	0	0	1	1	1	0	0	1	1	1	0	0	0	0	0	0	1	1	1	1	0	0	0	0
NC_022541	15639	GCCGGGCAAA.GGCTTCCGGC	G	C	40	PASS	NA	GT	0	0	0	0	0	0	0	1	1	0	0	1	1	0	1	0	0	1	1	0	0	0	1	0	0	0	0	1	1	1	1	1	1	0	0	0	0	1	1	1	1
NC_022541	15642	GGGCAAAGGC.TTCCGGCAGG	T	C	40	PASS	NA	GT	0	1	0	0	0	0	0	0	0	0	0	0	0	0	0	0	0	0	0	0	0	0	0	0	0	0	0	0	0	0	0	0	0	0	0	0	0	0	0	0	0
NC_022541	15645	CAAAGGCTTC.CGGCAGGCGC	C	G	40	PASS	NA	GT	0	0	0	0	0	0	0	1	1	0	0	1	1	0	1	0	0	1	1	0	0	0	1	0	0	0	0	1	1	1	1	1	1	0	0	0	0	1	1	1	1
NC_022541	15669	GCCATAACGG.CCGGTGCCGC	C	A	40	PASS	NA	GT	0	0	0	0	0	0	0	0	0	0	0	0	0	0	0	0	0	0	0	0	0	0	0	0	0	0	0	0	0	0	0	0	0	0	0	0	0	0	0	0	0
NC_022541	15672	ATAACGGCCG.GTGCCGCGCG	G	A	40	PASS	NA	GT	0	1	0	0	0	0	0	0	0	0	0	0	0	0	0	0	0	0	0	0	0	0	0	0	0	0	0	0	0	0	0	0	0	0	0	0	0	0	0	0	0
NC_022541	15675	ACGGCCGGTG.CCGCGCGAAT	C	T	40	PASS	NA	GT	0	0	0	0	0	0	0	1	1	0	0	1	1	0	1	0	0	1	1	0	0	0	1	0	0	0	0	1	1	1	1	1	1	0	0	0	0	1	1	1	1
NC_022541	15681	GGTGCCGCGC.GAATTGCACT	G	A	40	PASS	NA	GT	0	0	0	0	0	0	0	0	0	0	0	0	0	0	0	0	0	0	0	0	0	0	0	0	0	0	0	0	0	0	0	0	0	0	0	0	0	0	0	0	0
NC_022541	15684	GCCGCGCGAA.TTGCACTTCC	T	G	40	PASS	NA	GT	0	0	0	0	0	0	0	0	0	0	0	0	0	0	0	0	0	0	0	0	0	0	0	0	0	0	0	0	0	0	0	0	0	0	0	0	0	0	0	0	0
NC_022541	15685	CCGCGCGAAT.TGCACTTCCT	T	C	40	PASS	NA	GT	0	0	0	0	0	0	0	0	0	0	0	0	0	0	0	0	0	0	0	0	0	0	0	0	0	0	0	0	0	0	0	0	0	0	0	0	0	0	0	0	0
NC_022541	15690	CGAATTGCAC.TTCCTGCGCC	T	C	40	PASS	NA	GT	0	0	1	1	1	1	1	0	0	0	1	0	0	1	0	0	1	0	0	1	1	1	0	0	1	1	1	0	0	0	0	0	0	1	1	1	1	0	0	0	0
NC_022541	15699	CTTCCTGCGC.CTGTTGCAGA	C	T	40	PASS	NA	GT	0	0	0	0	0	0	0	0	0	0	0	0	0	0	0	0	0	0	0	0	0	0	0	0	0	0	0	0	0	0	0	0	0	0	0	0	0	0	0	0	0
NC_022541	15702	CCTGCGCCTG.TTGCAGATCG	T	C	40	PASS	NA	GT	0	1	1	1	1	1	1	0	0	0	1	0	0	1	0	0	1	0	0	1	1	1	0	0	1	1	1	0	0	0	0	0	0	1	1	1	1	0	0	0	0
NC_022541	15703	CTGCGCCTGT.TGCAGATCGG	T	G	40	PASS	NA	GT	0	0	0	0	0	0	0	0	0	0	0	0	0	0	0	0	0	0	0	0	0	0	0	0	0	0	0	0	0	0	0	0	0	0	0	0	0	0	0	0	0
NC_022541	15704	TGCGCCTGTT.GCAGATCGGT	G	C	40	PASS	NA	GT	0	0	0	0	0	0	0	0	0	0	0	0	0	0	0	0	0	0	0	0	0	0	0	0	0	0	0	0	0	0	0	0	0	0	0	0	0	0	0	0	0
NC_022541	15707	GCCTGTTGCA.GATCGGTGCC	G	A,T	40	PASS	NA	GT	0	0	0	0	0	0	0	0	0	0	0	1	1	0	0	0	0	0	0	0	0	0	0	0	0	0	0	0	0	0	0	0	0	0	0	0	0	0	0	0	0
NC_022541	15708	CCTGTTGCAG.ATCGGTGCCG	A	G	40	PASS	NA	GT	0	0	0	0	0	0	0	0	0	0	0	0	0	0	0	0	0	0	0	0	0	0	0	0	0	0	0	0	0	0	0	0	0	0	0	0	0	0	0	0	0
NC_022541	15714	GCAGATCGGT.GCCGATCAGC	G	A	40	PASS	NA	GT	0	0	0	0	0	0	0	0	0	0	0	1	1	0	0	0	0	0	0	0	0	0	0	0	0	0	0	0	0	0	0	0	0	0	0	0	0	0	0	0	0
NC_022541	16320	CCTGCTTGCG.CACCTGCTCG	C	T	40	PASS	NA	GT	0	0	1	1	1	1	1	0	0	0	1	0	0	1	0	0	1	0	0	1	1	1	0	0	1	1	1	0	0	0	0	0	0	1	1	1	1	0	0	0	0
NC_022541	16326	TGCGCACCTG.CTCGTTCTCG	C	T	40	PASS	NA	GT	0	1	0	0	0	0	0	0	0	0	0	0	0	0	0	0	0	0	0	0	0	0	0	0	0	0	0	0	0	0	0	0	0	0	0	0	0	0	0	0	0
NC_022541	16332	CCTGCTCGTT.CTCGTCGTCG	C	T	40	PASS	NA	GT	0	0	1	1	1	1	1	0	0	0	1	0	0	1	0	0	1	0	0	1	1	1	0	0	1	1	1	0	0	0	0	0	0	1	1	1	1	0	0	0	0
NC_022541	16356	CGTTGATGCC.GCCGGTGAAA	G	A	40	PASS	NA	GT	0	0	0	0	0	0	0	1	1	0	0	1	1	0	1	0	0	1	1	0	0	0	1	0	0	0	0	1	1	1	1	1	1	0	0	0	0	1	1	1	1
NC_022541	16365	CGCCGGTGAA.ACCGATGCGG	A	G	40	PASS	NA	GT	0	0	1	1	1	1	1	0	0	0	1	0	0	1	0	0	1	0	0	1	1	1	0	0	1	1	1	0	0	0	0	0	0	1	1	1	1	0	0	0	0
NC_022541	16368	CGGTGAAACC.GATGCGGCCA	G	C	40	PASS	NA	GT	0	1	0	0	0	0	0	0	0	0	0	0	0	0	0	0	0	0	0	0	0	0	0	0	0	0	0	0	0	0	0	0	0	0	0	0	0	0	0	0	0
NC_022541	16370	GTGAAACCGA.TGCGGCCATC	T	C	40	PASS	NA	GT	0	1	0	0	0	0	0	0	0	0	0	0	0	0	0	0	0	0	0	0	0	0	0	0	0	0	0	0	0	0	0	0	0	0	0	0	0	0	0	0	0
NC_022541	16382	CGGCCATCGA.CCACGATCAC	C	T	40	PASS	NA	GT	0	1	1	1	1	1	1	1	1	0	1	1	1	1	1	0	1	1	1	1	1	1	1	0	1	1	1	1	1	1	1	1	1	1	1	1	1	1	1	1	1
NC_022541	16383	GGCCATCGAC.CACGATCACC	C	G	40	PASS	NA	GT	0	1	1	1	1	1	1	1	1	0	1	1	1	1	1	0	1	1	1	1	1	1	1	0	1	1	1	1	1	1	1	1	1	1	1	1	1	1	1	1	1
NC_022541	16410	GGGTGCGCAG.ATTCAACCAT	A	G	40	PASS	NA	GT	0	1	1	1	1	1	1	1	1	0	1	1	1	1	1	0	1	1	1	1	1	1	1	0	1	1	1	1	1	1	1	1	1	1	1	1	1	1	1	1	1
NC_022541	16419	GATTCAACCA.TGGCCGCTTG	T	C	40	PASS	NA	GT	0	1	1	1	1	1	1	1	1	0	1	1	1	1	1	0	1	1	1	1	1	1	1	0	1	1	1	1	1	1	1	1	1	1	1	1	1	1	1	1	1
NC_022541	16431	GCCGCTTGAA.TGGCTTGAGC	T	C,G	40	PASS	NA	GT	0	0	1	1	1	1	1	0	0	0	1	0	0	1	0	0	1	0	0	1	1	1	0	0	1	1	1	0	0	0	0	0	0	1	1	1	1	0	0	0	0
NC_022541	16442	GGCTTGAGCA.ATTGCGAGGG	A	G	40	PASS	NA	GT	0	0	0	0	0	0	0	0	0	0	0	0	0	0	0	0	0	0	0	0	0	0	0	0	0	0	0	0	0	0	0	0	0	0	0	0	0	0	0	0	0
NC_022541	16443	GCTTGAGCAA.TTGCGAGGGA	T	C	40	PASS	NA	GT	0	0	0	0	0	0	0	1	1	0	0	1	1	0	1	0	0	1	1	0	0	0	1	0	0	0	0	1	1	1	1	1	1	0	0	0	0	1	1	1	1
NC_022541	16449	GCAATTGCGA.GGGATGGAAC	G	T	40	PASS	NA	GT	0	0	0	0	0	0	0	0	0	0	0	0	0	0	0	0	0	0	0	0	0	0	0	0	0	0	0	0	0	0	0	0	0	0	0	0	0	0	0	0	0
NC_022541	16452	ATTGCGAGGG.ATGGAACCAG	A	G	40	PASS	NA	GT	0	0	0	0	0	0	0	1	1	0	0	1	1	0	1	0	0	1	1	0	0	0	1	0	0	0	0	1	1	1	1	1	1	0	0	0	0	1	1	1	1
NC_022541	16457	GAGGGATGGA.ACCAGGCGGT	A	G	40	PASS	NA	GT	0	1	0	0	0	0	0	0	0	0	0	0	0	0	0	0	0	0	0	0	0	0	0	0	0	0	0	0	0	0	0	0	0	0	0	0	0	0	0	0	0
NC_022541	16479	CCACCCCGGC.CTCGCGCAGC	C	T	40	PASS	NA	GT	0	0	1	1	1	1	1	0	0	0	1	0	0	1	0	0	1	0	0	1	1	1	0	0	1	1	1	0	0	0	0	0	0	1	1	1	1	0	0	0	0
NC_022541	16496	AGCGTGCGCA.AGGCGCGTCG	A	G	40	PASS	NA	GT	0	1	0	0	0	0	0	0	0	0	0	0	0	0	0	0	0	0	0	0	0	0	0	0	0	0	0	0	0	0	0	0	0	0	0	0	0	0	0	0	0
NC_022541	16497	GCGTGCGCAA.GGCGCGTCGG	G	T	40	PASS	NA	GT	0	1	0	0	0	0	0	0	0	0	0	0	0	0	0	0	0	0	0	0	0	0	0	0	0	0	0	0	0	0	0	0	0	0	0	0	0	0	0	0	0
NC_022541	16518	TCATTGCCGA.TGAGCCGATC	T	G	40	PASS	NA	GT	0	0	1	1	1	1	1	0	0	0	1	0	0	1	0	0	1	0	0	1	1	1	0	0	1	1	1	0	0	0	0	0	0	1	1	1	1	0	0	0	0
NC_022541	16527	ATGAGCCGAT.CGCATCCATC	C	T	40	PASS	NA	GT	0	0	0	0	0	0	0	0	0	0	0	0	0	0	0	0	0	0	0	0	0	0	0	0	0	0	0	0	0	0	0	0	0	0	0	0	0	0	0	0	0
NC_022541	16535	ATCGCATCCA.TCAGCAGCCG	T	G	40	PASS	NA	GT	0	0	1	1	1	1	1	0	0	0	1	0	0	1	0	0	1	0	0	1	1	1	0	0	1	1	1	0	0	0	0	0	0	1	1	1	1	0	0	0	0
NC_022541	16554	GCACCTTGAC.CCCGGCACGG	C	T	40	PASS	NA	GT	0	1	0	0	0	0	0	0	0	0	0	0	0	0	0	0	0	0	0	0	0	0	0	0	0	0	0	0	0	0	0	0	0	0	0	0	0	0	0	0	0
NC_022541	16578	GTTCCATCAG.CGCAGCGCAG	C	T	40	PASS	NA	GT	0	0	0	0	0	0	0	0	0	0	0	0	0	0	0	0	0	0	0	0	0	0	0	0	0	0	0	0	0	0	0	0	0	0	0	0	0	0	0	0	0
NC_022541	16582	CATCAGCGCA.GCGCAGATCG	G	T	40	PASS	NA	GT	0	0	1	1	1	1	1	0	0	0	1	0	0	1	0	0	1	0	0	1	1	1	0	0	1	1	1	0	0	0	0	0	0	1	1	1	1	0	0	0	0
NC_022541	16587	GCGCAGCGCA.GATCGCGGTG	G	A	40	PASS	NA	GT	0	0	1	1	1	1	1	0	0	0	1	0	0	1	0	0	1	0	0	1	1	1	0	0	1	1	1	0	0	0	0	0	0	1	1	1	1	0	0	0	0
NC_022541	16590	CAGCGCAGAT.CGCGGTGCCG	C	T	40	PASS	NA	GT	0	0	1	1	1	1	1	0	0	0	1	0	0	1	0	0	1	0	0	1	1	1	0	0	1	1	1	0	0	0	0	0	0	1	1	1	1	0	0	0	0
NC_022541	16593	CGCAGATCGC.GGTGCCGCTT	G	A	40	PASS	NA	GT	0	0	1	1	1	1	1	0	0	0	1	0	0	1	0	0	1	0	0	1	1	1	0	0	1	1	1	0	0	0	0	0	0	1	1	1	1	0	0	0	0
NC_022541	16596	AGATCGCGGT.GCCGCTTTGG	G	A	40	PASS	NA	GT	0	1	0	0	0	0	0	0	0	0	0	0	0	0	0	0	0	0	0	0	0	0	0	0	0	0	0	0	0	0	0	0	0	0	0	0	0	0	0	0	0
NC_022541	16599	TCGCGGTGCC.GCTTTGGTCG	G	A	40	PASS	NA	GT	0	0	0	0	0	0	0	0	0	0	0	0	0	0	0	0	0	0	0	0	0	0	0	0	0	0	0	0	0	0	0	0	0	0	0	0	0	0	0	0	0
NC_022541	16602	CGGTGCCGCT.TTGGTCGGGC	T	G,A	40	PASS	NA	GT	0	1	1	1	1	1	1	1	1	0	1	1	1	1	1	0	1	1	1	1	1	1	1	0	1	1	1	1	1	1	1	1	1	1	1	1	1	1	1	1	1
NC_022541	16632	AGTACTCCAG.ATGGATATGG	A	G	40	PASS	NA	GT	0	0	1	1	1	1	1	0	0	0	1	0	0	1	0	0	1	0	0	1	1	1	0	0	1	1	1	0	0	0	0	0	0	1	1	1	1	0	0	0	0
NC_022541	16664	CGGATCGCTT.CGATGATGGC	C	G	40	PASS	NA	GT	0	0	1	1	1	1	1	0	0	0	1	0	0	1	0	0	1	0	0	1	1	1	0	0	1	1	1	0	0	0	0	0	0	1	1	1	1	0	0	0	0
NC_022541	16677	TGATGGCGGC.GTACGTGGCA	G	A	40	PASS	NA	GT	0	1	0	0	0	0	0	0	0	0	0	0	0	0	0	0	0	0	0	0	0	0	0	0	0	0	0	0	0	0	0	0	0	0	0	0	0	0	0	0	0
NC_022541	16683	CGGCGTACGT.GGCAGCGCCA	G	C	40	PASS	NA	GT	0	0	0	0	0	0	0	0	0	0	0	0	0	0	0	0	0	0	0	0	0	0	0	0	0	0	0	0	0	0	0	0	0	0	0	0	0	0	0	0	0
NC_022541	16689	ACGTGGCAGC.GCCATCCACC	G	A	40	PASS	NA	GT	0	0	1	1	1	1	1	0	0	0	1	0	0	1	0	0	1	0	0	1	1	1	0	0	1	1	1	0	0	0	0	0	0	1	1	1	1	0	0	0	0
NC_022541	16698	CGCCATCCAC.CAGCCAGTGC	C	A	40	PASS	NA	GT	0	0	0	0	0	0	0	0	0	0	0	0	0	0	0	0	0	0	0	0	0	0	0	0	0	0	0	0	0	0	0	0	1	0	0	0	0	0	0	0	0
NC_022541	16704	CCACCAGCCA.GTGCACTTCG	G	A	40	PASS	NA	GT	0	0	0	0	0	0	0	0	0	0	0	0	0	0	0	0	0	0	0	0	0	0	0	0	0	0	0	0	0	0	0	0	0	0	0	0	0	0	0	0	0
NC_022541	21343	ACTGCTCGTT.CACGTTATGC	C	T	40	LCB	NA	GT	0	0	0	0	0	0	0	0	0	0	0	0	0	0	0	0	0	0	0	0	0	0	0	0	0	0	0	0	0	0	0	0	0	0	0	0	0	0	0	0	0
NC_022541	21346	GCTCGTTCAC.GTTATGCGTG	G	A	40	LCB	NA	GT	0	0	0	0	0	0	0	0	0	0	0	0	0	0	0	0	0	0	0	0	0	0	0	0	0	0	0	0	0	0	0	0	0	0	0	0	0	0	0	0	0
NC_022541	21349	CGTTCACGTT.ATGCGTGAAG	A	G	40	LCB	NA	GT	0	0	1	1	1	1	1	0	0	0	1	0	0	1	0	0	1	0	0	1	1	1	0	0	1	1	1	0	0	0	0	0	0	1	1	1	1	0	0	0	0
NC_022541	21406	GGCCCTTGGT.ATCGACGAAG	A	G	40	LCB	NA	GT	0	1	0	0	0	0	0	0	0	0	0	0	0	0	0	0	0	0	0	0	0	0	0	0	0	0	0	0	0	0	0	0	0	0	0	0	0	0	0	0	0
NC_022541	21408	CCCTTGGTAT.CGACGAAGGT	C	T	40	LCB	NA	GT	0	0	0	0	0	0	0	0	0	0	0	0	0	0	0	0	0	0	0	0	0	0	0	0	0	0	0	1	1	0	0	0	0	0	0	0	0	0	0	1	0
NC_022541	21409	CCTTGGTATC.GACGAAGGTA	G	C	40	LCB	NA	GT	0	0	0	0	0	0	0	1	1	0	0	0	0	0	1	0	0	0	1	0	0	0	1	0	0	0	0	1	1	1	1	1	1	0	0	0	0	1	1	1	1
NC_022541	21418	CGACGAAGGT.ACCCGGTGCG	A	G	40	LCB	NA	GT	0	0	0	0	0	0	0	0	0	0	0	0	0	0	0	0	0	0	0	0	0	0	0	0	0	0	0	0	0	0	0	0	0	0	0	0	0	0	0	0	0
NC_022541	21424	AGGTACCCGG.TGCGGCCACG	T	C	40	LCB	NA	GT	0	1	1	1	1	1	1	0	0	0	1	0	0	1	0	0	1	0	0	1	1	1	0	0	1	1	1	0	0	0	0	0	0	1	1	1	1	0	0	0	0
NC_022541	21430	CCGGTGCGGC.CACGCTCAGC	C	T	40	LCB	NA	GT	0	1	0	0	0	0	0	0	0	0	0	0	0	0	0	0	0	0	0	0	0	0	0	0	0	0	0	0	0	0	0	0	0	0	0	0	0	0	0	0	0
NC_022541	21435	GCGGCCACGC.TCAGCACGGC	T	C	40	LCB	NA	GT	0	1	1	1	1	1	1	0	0	0	1	0	0	1	0	0	1	0	0	1	1	1	0	0	1	1	1	0	0	0	0	0	0	1	1	1	1	0	0	0	0
NC_022541	21445	TCAGCACGGC.GGCAGCACTG	G	A	40	LCB	NA	GT	0	1	0	0	0	0	0	0	0	0	0	0	0	0	0	0	0	0	0	0	0	0	0	0	0	0	0	0	0	0	0	0	0	0	0	0	0	0	0	0	0
NC_022541	21538	GGGTGTTCTC.ATCGATGCTG	A	G	40	PASS	NA	GT	0	1	0	0	0	0	0	0	0	0	0	0	0	0	0	0	0	0	0	0	0	0	0	0	0	0	0	0	0	0	0	0	0	0	0	0	0	0	0	0	0
NC_022541	21556	TGAACAAGCC.GCCCAGGGTG	G	A	40	PASS	NA	GT	0	0	0	0	0	0	0	0	0	0	0	0	0	0	0	0	0	0	0	0	0	0	0	0	0	0	0	0	0	0	0	0	0	0	0	0	0	0	0	0	0
NC_022541	21559	ACAAGCCGCC.CAGGGTGAAG	C	G	40	PASS	NA	GT	0	0	0	0	0	0	0	0	0	0	0	0	0	0	0	0	0	1	0	0	0	0	0	0	0	0	0	0	0	0	0	0	0	0	0	0	0	0	0	0	0
NC_022541	21613	AGCCATCGGC.GCTGCCCGGC	G	A	40	PASS	NA	GT	0	0	0	0	0	0	0	0	0	0	0	0	0	0	0	0	0	1	0	0	0	0	0	0	0	0	0	0	0	0	0	0	0	0	0	0	0	0	0	0	0
NC_022541	21614	GCCATCGGCG.CTGCCCGGCG	C	T	40	PASS	NA	GT	0	0	0	0	0	0	0	0	0	0	0	0	0	0	0	0	0	1	0	0	0	0	0	0	0	0	0	0	0	0	0	0	0	0	0	0	0	0	0	0	0
NC_022541	21622	CGCTGCCCGG.CGCGAAGCCC	C	T	40	PASS	NA	GT	0	0	0	0	0	0	0	0	0	0	0	0	0	0	0	0	0	0	0	0	0	0	0	0	0	0	0	0	0	0	0	0	0	0	0	0	0	0	0	0	0
NC_022541	21646	CGCGGCGCGC.AGCCAGCACG	A	G	40	PASS	NA	GT	0	0	0	0	0	0	0	0	0	0	0	0	0	0	0	0	0	1	0	0	0	0	0	0	0	0	0	0	0	0	0	0	0	0	0	0	0	0	0	0	0
NC_022541	21664	CGCTGCCGAA.ATCCACCGCG	A	G	40	PASS	NA	GT	0	0	1	1	1	1	1	0	0	0	1	0	0	1	0	0	1	1	0	1	1	1	0	0	1	1	1	0	0	0	0	0	0	1	1	1	1	0	0	0	0
NC_022541	21667	TGCCGAAATC.CACCGCGTTG	C	G	40	PASS	NA	GT	0	0	0	0	0	0	0	0	0	0	0	0	0	0	0	0	0	1	0	0	0	0	0	0	0	0	0	0	0	0	0	0	0	0	0	0	0	0	0	0	0
NC_022541	21670	CGAAATCCAC.CGCGTTGGCC	C	G	40	PASS	NA	GT	0	1	0	0	0	0	0	0	0	0	0	0	0	0	0	0	0	0	0	0	0	0	0	0	0	0	0	0	0	0	0	0	0	0	0	0	0	0	0	0	0
NC_022541	21673	AATCCACCGC.GTTGGCCAGG	G	A	40	PASS	NA	GT	0	0	0	0	0	0	0	0	0	0	0	0	0	0	0	0	0	1	0	0	0	0	0	0	0	0	0	0	0	0	0	0	0	0	0	0	0	0	0	0	0
NC_022541	21687	GCCAGGTCGA.TATCCAGACG	T	C	40	PASS	NA	GT	0	0	0	0	0	0	0	0	0	0	0	0	0	0	0	0	0	0	0	0	0	0	0	0	0	0	0	0	0	0	0	0	0	0	0	0	0	0	0	0	0
NC_022541	21701	CAGACGCTCG.GCGAACACCG	G	A	40	PASS	NA	GT	0	0	0	0	0	0	0	0	0	0	0	0	0	0	0	0	0	0	0	0	0	0	0	0	0	0	0	0	0	0	0	0	0	0	0	0	0	0	0	0	0
NC_022541	21730	AGGACACGTA.CGGGTTCACG	C	A	40	PASS	NA	GT	0	0	0	0	0	0	0	0	0	0	0	0	0	0	0	0	0	0	0	0	0	0	0	0	0	0	0	0	0	0	0	0	0	0	0	0	0	0	0	0	0
NC_022541	21748	CGTCATAGGA.GAACGCGACG	G	A	40	PASS	NA	GT	0	0	0	0	0	0	0	0	0	0	0	0	0	0	0	0	0	0	0	0	0	0	0	0	0	0	0	0	0	0	0	0	0	0	0	0	0	0	0	0	0
NC_022541	21751	CATAGGAGAA.CGCGACGTTG	C	T	40	PASS	NA	GT	0	0	1	1	1	1	1	0	0	0	1	0	0	1	0	0	1	0	0	1	1	1	0	0	1	1	1	0	0	0	0	0	0	1	1	1	1	0	0	0	0
NC_022541	21757	AGAACGCGAC.GTTGAAGTCG	G	A	40	PASS	NA	GT	0	0	0	0	0	0	0	0	0	0	0	0	0	0	0	0	0	1	0	0	0	0	0	0	0	0	0	0	0	0	0	0	0	0	0	0	0	0	0	0	0
NC_022541	21777	ATCGCCTGCA.GCTCGGTCTT	G	A	40	PASS	NA	GT	0	0	1	1	1	1	1	0	0	0	1	0	0	0	0	0	1	0	0	1	1	1	0	0	1	1	0	0	0	0	0	0	0	1	1	0	1	0	0	0	0
NC_022541	21802	CGTGGTAGCG.GCCGACCCAG	G	A	40	PASS	NA	GT	0	0	0	0	0	0	0	0	0	0	0	0	0	0	0	0	0	0	0	0	0	0	0	0	0	0	0	0	0	0	0	0	0	0	0	0	0	0	0	0	0
NC_022541	21819	CAGTCGCGGT.CGTATTCGGT	C	T	40	PASS	NA	GT	0	0	0	0	0	0	0	0	0	0	0	0	0	0	0	0	0	0	0	0	0	0	0	0	0	0	0	0	0	0	0	0	0	0	0	0	0	0	0	0	0
NC_022541	21841	TGAAGCCGAA.CGGCACGGTC	C	G	40	PASS	NA	GT	0	0	1	1	1	1	1	0	0	0	1	0	0	1	0	0	1	0	0	1	1	1	0	0	1	1	1	0	0	0	0	0	0	1	1	1	1	0	0	0	0
NC_022541	21859	TCAGCGAGGT.GCCCAGGTGC	G	A	40	PASS	NA	GT	0	0	0	0	0	0	0	0	0	0	0	0	0	0	0	0	0	1	0	0	0	0	0	0	0	0	0	0	0	0	0	0	0	0	0	0	0	0	0	0	0
NC_022541	21906	TGGAAGTACA.GAGCCGGGAC	G	T	40	PASS	NA	GT	0	1	1	1	1	1	1	1	1	0	1	1	1	1	1	0	1	1	1	1	1	1	1	0	1	1	1	1	1	1	1	1	1	1	1	1	1	1	1	1	1
NC_022541	21907	GGAAGTACAG.AGCCGGGACC	A	C	40	PASS	NA	GT	0	1	1	1	1	1	1	1	1	0	1	1	1	1	1	0	1	1	1	1	1	1	1	0	1	1	1	1	1	1	1	1	1	1	1	1	1	1	1	1	1
NC_022541	21931	CGATCATGCC.GGCGTCGCCG	G	A	40	PASS	NA	GT	0	0	0	0	0	0	0	0	0	0	0	0	0	0	0	0	0	0	0	0	0	0	0	0	0	0	0	0	0	0	0	0	0	0	0	0	0	0	0	0	0
NC_022541	21938	GCCGGCGTCG.CCGCCGTTGC	C	T	40	PASS	NA	GT	0	0	0	0	0	0	0	0	0	0	0	0	0	0	0	0	0	0	0	0	0	0	0	0	0	0	0	0	0	0	0	0	0	0	0	0	0	0	0	0	0
NC_022541	21943	CGTCGCCGCC.GTTGCCGCCG	G	A	40	PASS	NA	GT	0	0	0	0	0	0	0	0	0	0	0	0	0	0	0	0	0	1	0	0	0	0	0	0	0	0	0	0	0	0	0	0	0	0	0	0	0	0	0	0	0
NC_022541	21946	CGCCGCCGTT.GCCGCCGGAC	G	A	40	PASS	NA	GT	0	0	0	0	0	0	0	0	0	0	0	0	0	0	0	0	0	0	0	0	0	0	0	0	0	0	0	0	0	0	0	0	0	0	0	0	0	0	0	0	0
NC_022541	21955	TGCCGCCGGA.CACCGGTGCG	C	G	40	PASS	NA	GT	0	1	1	1	1	1	1	0	0	0	1	0	0	1	0	0	1	1	0	1	1	1	0	0	1	1	1	0	0	0	0	0	0	1	1	1	1	0	0	0	0
NC_022541	21961	CGGACACCGG.TGCGCCGTTG	T	A,C,G	40	PASS	NA	GT	0	1	1	1	1	1	1	2	2	0	1	2	2	1	2	0	1	3	2	1	1	1	2	0	1	1	1	2	2	2	2	2	2	1	1	1	1	2	2	2	2
NC_022541	21964	ACACCGGTGC.GCCGTTGGCG	G	A	40	PASS	NA	GT	0	0	0	0	0	0	0	0	0	0	0	0	0	0	0	0	0	0	0	0	0	0	0	0	0	0	0	0	0	0	0	0	0	0	0	0	0	0	0	0	0
NC_022541	21978	TTGGCGTAGG.CCGCGGTGTC	C	T	40	PASS	NA	GT	0	0	0	0	0	0	0	0	0	0	0	0	0	0	0	0	0	1	0	0	0	0	0	0	0	0	0	0	0	0	0	0	0	0	0	0	0	0	0	0	0
NC_022541	21979	TGGCGTAGGC.CGCGGTGTCG	C	G	40	PASS	NA	GT	0	0	0	0	0	0	0	0	0	0	0	0	0	0	0	0	0	1	0	0	0	0	0	0	0	0	0	0	0	0	0	0	0	0	0	0	0	0	0	0	0
NC_022541	22006	ACTTGGCCGA.AAAGCTGATG	A	G	40	PASS	NA	GT	0	1	1	1	1	1	1	1	1	0	1	0	0	1	1	0	1	1	1	1	1	1	1	0	1	1	1	1	1	1	1	1	1	1	1	1	1	1	1	1	1
NC_022541	22042	GGAACAGGCG.GCCGTCCAGC	G	A	40	PASS	NA	GT	0	1	1	1	1	1	1	0	0	0	1	0	0	1	0	0	1	1	0	1	1	1	0	0	1	1	1	0	0	0	0	0	0	1	1	1	1	0	0	0	0
NC_022541	22054	CGTCCAGCTG.GCGCATGCCG	G	A	40	PASS	NA	GT	0	0	0	0	0	0	0	0	0	0	0	0	0	0	0	0	0	1	0	0	0	0	0	0	0	0	0	0	0	0	0	0	0	0	0	0	0	0	0	0	0
NC_022541	22063	GGCGCATGCC.GGCCGGGTTG	G	T	40	PASS	NA	GT	0	1	0	0	0	0	0	0	0	0	0	0	0	1	0	0	0	0	0	0	0	0	0	0	0	0	1	0	0	0	0	0	0	0	0	1	0	0	0	0	0
NC_022541	22072	CGGCCGGGTT.GGTGGCGATG	G	A	40	PASS	NA	GT	0	0	0	0	0	0	0	0	0	0	0	0	0	0	0	0	0	0	0	0	0	0	0	0	0	0	0	0	0	0	0	0	0	0	0	0	0	0	0	0	0
NC_022541	22073	GGCCGGGTTG.GTGGCGATGA	G	T	40	PASS	NA	GT	0	1	1	1	1	1	1	0	0	0	1	0	0	1	0	0	1	1	0	1	1	1	0	0	1	1	1	0	0	0	0	0	0	1	1	1	1	0	0	0	0
NC_022541	22084	TGGCGATGAT.GGAGGCATCA	G	C	40	PASS	NA	GT	0	0	0	0	0	0	0	0	0	0	0	0	0	0	0	0	0	1	0	0	0	0	0	0	0	0	0	0	0	0	0	0	0	0	0	0	0	0	0	0	0
NC_022541	22093	TGGAGGCATC.ATCCGGGGCG	A	G	40	PASS	NA	GT	0	0	0	0	0	0	0	0	0	0	0	0	0	0	0	0	0	1	0	0	0	0	0	0	0	0	0	0	0	0	0	0	0	0	0	0	0	0	0	0	0
NC_022541	22114	TGCCCGAACC.TGCGAATGCG	T	G	40	PASS	NA	GT	0	0	0	0	0	0	0	0	0	0	0	0	0	0	0	0	0	1	0	0	0	0	0	0	0	0	0	0	0	0	0	0	0	0	0	0	0	0	0	0	0
NC_022541	22120	AACCTGCGAA.TGCGCGGCCG	T	G,C	40	PASS	NA	GT	0	0	0	0	0	0	0	0	0	0	0	0	0	0	0	0	0	1	0	0	0	0	0	0	0	0	0	0	0	0	0	0	0	0	0	0	0	0	0	0	0
NC_022541	22123	CTGCGAATGC.GCGGCCGAGG	G	A	40	PASS	NA	GT	0	0	0	0	0	0	0	0	0	0	0	0	0	0	0	0	0	1	0	0	0	0	0	0	0	0	0	0	0	0	0	0	0	0	0	0	0	0	0	0	0
NC_022541	22129	ATGCGCGGCC.GAGGCCCTTG	G	A	40	PASS	NA	GT	0	1	0	0	0	0	0	1	1	0	0	1	1	0	1	0	0	1	1	0	0	0	1	0	0	0	0	1	1	1	1	1	1	0	0	0	0	1	1	1	1
NC_022541	22132	CGCGGCCGAG.GCCCTTGGCG	G	A	40	PASS	NA	GT	0	0	0	0	0	0	0	0	0	0	0	0	0	0	0	0	0	1	0	0	0	0	0	0	0	0	0	0	0	0	0	0	0	0	0	0	0	0	0	0	0
NC_022541	22150	CGCTGTTTTC.CTTCAGCTGG	C	T	40	PASS	NA	GT	0	0	0	0	0	0	0	0	0	0	0	0	0	1	0	0	0	0	0	0	0	0	0	0	0	0	1	0	0	0	0	0	0	0	0	1	0	0	0	0	0
NC_022541	22151	GCTGTTTTCC.TTCAGCTGGA	T	C	40	PASS	NA	GT	0	0	0	0	0	0	0	0	0	0	0	0	0	0	0	0	0	0	0	0	0	0	0	0	0	0	0	0	0	0	0	0	0	0	0	0	0	0	0	0	0
NC_022541	22162	TCAGCTGGAA.CGCGGCGCCG	C	G	40	PASS	NA	GT	0	0	0	0	0	0	0	0	0	0	0	0	0	0	0	0	0	1	0	0	0	0	0	0	0	0	0	0	0	0	0	0	0	0	0	0	0	0	0	0	0
NC_022541	22216	CGACGGCCAA.CAGGGTGGCG	C	G	40	PASS	NA	GT	0	0	0	0	0	0	0	1	1	0	0	1	1	0	1	0	0	1	1	0	0	0	1	0	0	0	0	1	1	1	1	1	1	0	0	0	0	1	1	1	1
NC_022541	22253	GGTAGACATA.AGTTGTAGCT	A	T	40	PASS	NA	GT	0	0	0	0	0	0	0	0	0	0	0	0	0	1	0	0	0	0	0	0	0	0	0	0	0	0	0	0	0	0	0	0	0	0	0	0	0	0	0	0	0
NC_022541	22273	CTCCGGATAA.GGACTGCAAT	G	A	40	PASS	NA	GT	0	0	1	1	1	1	1	0	0	0	1	0	0	1	0	0	1	0	0	1	1	1	0	0	1	1	1	0	0	0	0	0	0	1	1	1	1	0	0	0	0
NC_022541	22288	GCAATGGTCG.GTTCAGCGCC	G	A	40	PASS	NA	GT	0	0	0	0	0	0	0	0	0	0	0	0	0	0	0	0	0	0	0	0	0	0	0	0	0	0	0	0	0	0	0	0	0	0	0	0	0	0	0	0	0
NC_022541	22463	GGCTATTGTC.CCCGTCCGAT	C	G	40	LCB	NA	GT	0	1	0	0	0	0	0	0	0	0	0	0	0	0	0	0	0	0	0	0	0	0	0	0	0	0	0	0	0	0	0	0	0	0	0	0	0	0	0	0	0
NC_022541	22485	TCGTCTCTCT.TCCTTCCCGC	T	C	40	LCB	NA	GT	0	0	1	1	1	1	1	0	0	0	1	0	0	1	0	0	1	0	0	1	1	1	0	0	1	1	1	0	0	0	0	0	0	1	1	1	1	0	0	0	0
NC_022541	22875	TGATCATCGG.TGCCTCGGGT	T	C	40	PASS	NA	GT	0	1	1	1	1	1	1	1	1	0	1	1	1	1	1	0	1	1	1	1	1	1	1	0	1	1	1	1	1	1	1	1	1	1	1	1	1	1	1	1	1
NC_022541	22884	GTGCCTCGGG.TGCGGTGTCG	T	C	40	PASS	NA	GT	0	0	1	1	1	1	1	0	0	0	1	0	0	1	0	0	1	0	0	1	1	1	0	0	1	1	1	0	0	0	0	0	0	1	1	1	1	0	0	0	0
NC_022541	22893	GTGCGGTGTC.GGCGTTGATC	G	T	40	PASS	NA	GT	0	0	0	0	0	0	0	0	0	0	0	0	0	0	0	0	0	0	0	0	0	0	0	0	0	0	0	0	0	0	0	0	0	0	0	0	0	0	0	0	0
NC_022541	22896	CGGTGTCGGC.GTTGATCGGC	G	A	40	PASS	NA	GT	0	0	1	1	1	1	1	0	0	0	1	0	0	1	0	0	1	0	0	1	1	1	0	0	1	1	1	0	0	0	0	0	0	1	1	1	1	0	0	0	0
NC_022541	22911	TCGGCACGTA.CCTGGCGCTG	C	T	40	PASS	NA	GT	0	0	1	1	1	1	1	0	0	0	1	0	0	1	0	0	1	0	0	1	1	1	0	0	1	1	1	0	0	0	0	0	0	1	1	1	1	0	0	0	0
NC_022541	22926	CGCTGTTTCC.GGGCGCCAAG	G	C	40	PASS	NA	GT	0	0	1	1	1	1	1	0	0	0	1	0	0	1	0	0	1	0	0	1	1	1	0	0	1	1	1	0	0	0	0	0	0	1	1	1	1	0	0	0	0
NC_022541	22944	AGCTGGGCGT.GGTCCTGCCG	G	T	40	PASS	NA	GT	0	0	0	0	0	0	0	0	0	0	0	0	0	0	0	0	0	0	0	0	0	0	0	0	0	0	0	0	0	0	0	0	0	0	0	0	0	0	0	0	0
NC_022541	22947	TGGGCGTGGT.CCTGCCGCTG	C	G	40	PASS	NA	GT	0	1	1	1	1	1	1	0	0	0	1	0	0	1	0	0	1	0	0	1	1	1	0	0	1	1	1	0	0	0	0	0	0	1	1	1	1	0	0	0	0
NC_022541	22959	TGCCGCTGGG.CGTGTTTCTG	C	T	40	PASS	NA	GT	0	0	1	1	1	1	1	0	0	0	1	0	0	0	0	0	1	0	0	1	1	1	0	0	1	1	0	0	0	0	0	0	0	1	1	0	1	0	0	0	0
NC_022541	22977	TGGAATTCAT.CCGTGTGCCG	C	T	40	PASS	NA	GT	0	1	0	0	0	0	0	0	0	0	0	0	0	0	0	0	0	0	0	0	0	0	0	0	0	0	0	0	0	0	0	0	0	0	0	0	0	0	0	0	0
NC_022541	22980	AATTCATCCG.TGTGCCGGCG	T	G	40	PASS	NA	GT	0	0	1	1	1	1	1	1	1	0	1	1	1	1	1	0	1	1	1	1	1	1	1	0	1	1	1	1	1	1	1	1	1	1	1	1	1	1	1	1	1
NC_022541	22993	GCCGGCGCCG.CTGTTGATCG	C	T	40	PASS	NA	GT	0	0	1	1	1	1	1	0	0	0	1	0	0	1	0	0	1	0	0	1	1	1	0	0	1	1	1	0	0	0	0	0	0	1	1	1	1	0	0	0	0
NC_022541	22995	CGGCGCCGCT.GTTGATCGGC	G	A	40	PASS	NA	GT	0	0	0	0	0	0	0	0	0	0	0	0	0	0	0	0	0	0	0	0	0	0	0	0	0	0	0	0	0	0	0	0	0	0	0	0	0	0	0	0	0
NC_022541	23013	GCGCCTGGGC.ACTGCTACAG	A	G	40	PASS	NA	GT	0	0	1	1	1	1	1	0	0	0	1	0	0	1	0	0	1	0	0	1	1	1	0	0	1	1	1	0	0	0	0	0	0	1	1	1	1	0	0	0	0
NC_022541	23019	GGGCACTGCT.ACAGGTGGTG	A	G	40	PASS	NA	GT	0	1	1	1	1	1	1	1	1	0	1	1	1	1	1	0	1	1	1	1	1	1	1	0	1	1	1	1	1	1	1	1	1	1	1	1	1	1	1	1	1
NC_022541	23037	TGTTCGCCTA.CATCGGCCCG	C	T	40	PASS	NA	GT	0	1	1	1	1	1	1	0	0	0	1	0	0	1	0	0	1	0	0	1	1	1	0	0	1	1	1	0	0	0	0	0	0	1	1	1	1	0	0	0	0
NC_022541	23043	CCTACATCGG.CCCGGCGTTC	C	G	40	PASS	NA	GT	0	0	1	1	1	1	1	0	0	0	1	0	0	1	0	0	1	0	0	1	1	1	0	0	1	1	1	0	0	0	0	0	0	1	1	1	1	0	0	0	0
NC_022541	25004	AGTTCGGCCA.AGGCTTCGGT	A	G	40	PASS	NA	GT	0	1	1	1	1	1	1	0	0	0	1	0	0	1	0	0	1	0	0	1	1	1	0	0	1	1	1	0	0	0	0	0	0	1	1	1	1	0	0	0	0
NC_022541	25006	TTCGGCCAAG.GCTTCGGTGA	G	A	40	PASS	NA	GT	0	0	0	0	0	0	0	0	0	0	0	0	0	0	0	0	0	0	0	0	0	0	0	0	0	0	0	0	0	0	0	0	0	1	0	0	0	0	0	0	0
NC_022541	25008	CGGCCAAGGC.TTCGGTGATC	T	C	40	PASS	NA	GT	0	0	0	0	0	0	0	0	0	0	0	0	0	0	0	0	0	0	0	0	0	0	0	0	0	0	0	0	0	0	0	0	0	0	0	0	0	0	0	0	0
NC_022541	25013	AAGGCTTCGG.TGATCGGGCC	T	C	40	PASS	NA	GT	0	1	1	1	1	1	1	0	0	0	1	0	0	1	0	0	1	0	0	1	1	1	0	0	1	1	1	0	0	0	0	0	0	1	1	1	1	0	0	0	0
NC_022541	25034	TCGCCCGGCA.GCACGTCGCC	G	A	40	PASS	NA	GT	0	0	0	0	0	0	0	0	0	0	0	0	0	0	0	0	0	0	0	0	0	0	0	0	0	0	0	0	0	0	0	0	0	0	0	0	0	0	0	0	0
NC_022541	25035	CGCCCGGCAG.CACGTCGCCG	C	T	40	PASS	NA	GT	0	0	0	0	0	0	0	0	0	0	0	0	0	0	0	0	0	0	0	0	0	0	0	0	0	0	0	0	0	0	0	0	0	0	0	0	0	0	0	0	0
NC_022541	25059	TGTAGCCCTC.CTCGCCTTCG	C	T	40	PASS	NA	GT	0	1	1	1	1	1	1	0	0	0	1	0	0	1	0	0	1	0	0	1	1	1	0	0	1	1	1	0	0	0	0	0	0	1	1	1	1	0	0	0	0
NC_022541	25092	GGTGGCCCGG.CAAGGTGGCT	C	T	40	PASS	NA	GT	0	0	1	1	1	1	1	0	0	0	1	0	0	1	0	0	1	0	0	1	1	1	0	0	1	1	1	0	0	0	0	0	0	1	1	1	1	0	0	0	0
NC_022541	25094	TGGCCCGGCA.AGGTGGCTTC	A	G	40	PASS	NA	GT	0	0	0	0	0	0	0	0	0	0	0	0	0	0	0	0	0	0	0	0	0	0	0	0	0	0	0	0	0	0	0	0	0	0	0	0	0	0	0	0	0
NC_022541	25127	AGGCTGGCCG.GCGCATCGGC	G	A	40	PASS	NA	GT	0	0	0	0	0	0	0	0	0	0	0	0	0	0	0	0	0	0	0	0	0	0	0	0	0	0	0	0	0	0	0	0	0	0	0	0	0	0	0	0	0
NC_022541	25129	GCTGGCCGGC.GCATCGGCAT	G	A	40	PASS	NA	GT	0	1	1	1	1	1	1	1	1	0	1	1	1	1	1	0	1	1	1	1	1	1	1	0	1	1	1	1	1	1	1	1	1	1	1	1	1	1	1	1	1
NC_022541	25137	GCGCATCGGC.ATCGCCCGGC	A	G	40	PASS	NA	GT	0	0	1	1	1	1	1	0	0	0	1	0	0	1	0	0	1	0	0	1	1	1	0	0	1	1	1	0	0	0	0	0	0	1	1	1	1	0	0	0	0
NC_022541	25140	CATCGGCATC.GCCCGGCTGC	G	C	40	PASS	NA	GT	0	0	0	0	0	0	0	0	0	0	0	0	0	0	0	0	0	0	0	0	0	0	0	0	0	0	0	0	0	0	0	0	0	0	0	0	0	0	0	0	0
NC_022541	25143	CGGCATCGCC.CGGCTGCGGT	C	G	40	PASS	NA	GT	0	1	0	0	0	0	0	0	0	0	0	0	0	0	0	0	0	0	0	0	0	0	0	0	0	0	0	0	0	0	0	0	0	0	0	0	0	0	0	0	0
NC_022541	25146	CATCGCCCGG.CTGCGGTTCG	C	T	40	PASS	NA	GT	0	0	0	0	0	0	0	0	0	0	0	0	0	0	0	0	0	0	0	0	0	0	0	0	0	0	0	0	0	0	0	0	0	0	0	0	0	0	0	0	0
NC_022541	25158	GCGGTTCGGG.GGCGAGCAGC	G	C	40	PASS	NA	GT	0	0	1	1	1	1	1	0	0	0	1	0	0	1	0	0	1	0	0	1	1	1	0	0	1	1	1	0	0	0	0	0	0	1	1	1	1	0	0	0	0
NC_022541	25160	GGTTCGGGGG.CGAGCAGCAC	C	T	40	PASS	NA	GT	0	1	1	1	1	1	1	1	1	0	1	1	1	1	1	0	1	1	1	1	1	1	1	0	1	1	1	1	1	1	1	1	1	1	1	1	1	1	1	1	1
NC_022541	25167	GGGCGAGCAG.CACGTCCGGC	C	T,G	40	PASS	NA	GT	0	1	2	2	2	2	2	0	0	0	2	0	0	2	0	0	2	0	0	2	2	2	0	0	2	2	2	0	0	0	0	0	0	2	2	2	2	0	0	0	0
NC_022541	25178	ACGTCCGGCA.CGATGCCGCT	C	T	40	PASS	NA	GT	0	0	0	0	0	0	0	0	0	0	0	0	0	0	0	0	0	0	0	0	0	0	0	0	0	0	0	0	0	0	0	0	0	0	0	0	0	0	0	0	0
NC_022541	25179	CGTCCGGCAC.GATGCCGCTG	G	A	40	PASS	NA	GT	0	0	0	0	0	0	0	0	0	0	0	0	0	0	0	0	0	1	0	0	0	0	0	0	0	0	0	0	0	0	0	0	0	0	0	0	0	0	0	0	0
NC_022541	25443	TGGCATCGCT.GATGGAGATG	G	A	40	LCB	NA	GT	0	0	0	0	0	0	0	0	0	0	0	0	0	0	0	0	0	0	0	0	0	0	0	0	0	0	0	0	0	0	0	0	0	0	0	0	0	0	0	0	0
NC_022541	25446	CATCGCTGAT.GGAGATGCGC	G	C	40	LCB	NA	GT	0	1	1	1	1	1	1	0	0	0	1	0	0	1	0	0	1	0	0	1	1	1	0	0	1	1	1	0	0	0	0	0	0	1	1	1	1	0	0	0	0
NC_022541	25473	TGCTGACGAT.ATTGCCCTTG	A	C	40	LCB	NA	GT	0	0	1	0	1	1	1	0	0	0	0	0	0	0	0	0	0	0	0	0	0	1	0	0	0	0	0	0	0	0	0	0	0	1	0	0	0	0	0	0	0
NC_022541	25490	TTGTCCAGCA.GATCGTCGGC	G	A	40	LCB	NA	GT	0	0	0	0	0	0	0	0	0	0	0	0	0	1	0	0	0	0	0	0	0	0	0	0	0	0	1	0	0	0	0	0	0	0	0	1	0	0	0	0	0
NC_022541	25506	CGGCCACCTG.CACCGCCGAG	C	T	40	LCB	NA	GT	0	0	0	0	0	0	0	0	0	0	0	0	0	0	0	0	0	0	0	0	0	0	0	0	0	0	0	0	0	0	0	0	0	0	0	0	0	0	0	0	0
NC_022541	25509	CCACCTGCAC.CGCCGAGGTC	C	G	40	LCB	NA	GT	0	0	0	0	0	0	0	0	0	0	0	0	0	1	0	0	0	0	0	0	0	0	0	0	0	0	1	0	0	0	0	0	0	0	0	1	0	0	0	0	0
NC_022541	25527	TCAGCAGACC.GCCGGGGTTG	G	A	40	LCB	NA	GT	0	0	1	1	1	1	1	0	0	0	1	0	0	1	0	0	1	0	0	1	1	1	0	0	1	1	1	0	0	0	0	0	0	1	1	1	1	0	0	0	0
NC_022541	25545	TGCTGCGCAG.GTCCAGCACC	G	A	40	LCB	NA	GT	0	0	1	1	1	1	1	1	1	0	1	1	1	1	1	0	1	1	1	1	1	1	1	0	1	1	1	1	1	1	1	1	1	1	1	1	1	1	1	1	1
NC_022541	25557	CCAGCACCAG.GCCGCGCAAC	G	C,A	40	LCB	NA	GT	0	1	0	0	0	0	0	0	0	0	0	0	0	0	0	0	0	0	0	0	0	0	0	0	0	0	0	0	0	0	0	0	0	0	0	0	0	0	0	0	0
NC_022541	25687	CACGCTGGCC.ACGCGGATGG	A	G	40	LCB	NA	GT	0	0	1	1	1	1	1	0	0	0	1	0	0	0	0	0	1	0	0	1	1	1	0	0	1	1	0	0	0	0	0	0	0	1	1	0	1	0	0	0	0
NC_022541	25707	TTTCGCGCTG.CAGGGTCACA	C	A	40	LCB	NA	GT	0	1	0	0	0	0	0	0	0	0	0	0	0	0	0	0	0	0	0	0	0	0	0	0	0	0	0	0	0	0	0	0	0	0	0	0	0	0	0	0	0
NC_022541	25732	CGGCTTGGGC.GTCTTGTCGC	G	A	40	LCB	NA	GT	0	0	0	0	0	0	0	1	1	0	0	0	0	0	1	0	0	0	1	0	0	0	1	0	0	0	0	1	1	1	1	1	0	0	0	0	0	1	1	1	1
NC_022541	25757	ATGGTCAACA.CGACCTTGCT	C	G	40	LCB	NA	GT	0	0	0	0	0	0	0	0	0	0	0	0	0	0	0	0	0	0	0	0	0	0	0	0	0	0	0	0	0	0	0	0	0	0	0	0	0	0	0	0	0
NC_022541	25776	TGCCGGATTC.GCCACGCAGC	G	C	40	LCB	NA	GT	0	0	0	0	0	0	0	0	0	0	0	0	0	0	0	0	0	0	0	0	0	0	0	0	0	0	0	0	0	0	0	0	0	0	0	0	0	0	0	0	0
NC_022541	25779	CGGATTCGCC.ACGCAGCGGC	A	G	40	LCB	NA	GT	0	1	1	1	1	1	1	0	0	0	1	0	0	1	0	0	1	1	0	1	1	1	0	0	1	1	1	0	0	0	0	0	1	1	1	1	1	0	0	0	0
NC_022541	25794	GCGGCTCCAT.CGCCTTGCTG	C	G	40	LCB	NA	GT	0	0	0	0	0	0	0	1	1	0	0	1	1	0	1	0	0	0	1	0	0	0	1	0	0	0	0	1	1	1	1	1	0	0	0	0	0	1	1	1	1
NC_022541	25893	TCGGCGCGAT.CACCTTCAGC	C	G	40	PASS	NA	GT	0	0	0	0	0	0	0	0	0	0	0	0	0	0	0	0	0	0	0	0	0	0	0	0	0	0	0	0	0	0	0	0	0	0	0	0	0	0	0	0	0
NC_022541	25899	CGATCACCTT.CAGCGTGTTG	C	G	40	PASS	NA	GT	0	1	1	1	1	1	1	1	1	0	1	1	1	1	1	0	1	1	1	1	1	1	1	0	1	1	1	1	1	1	1	1	1	1	1	1	1	1	1	1	1
NC_022541	25902	TCACCTTCAG.CGTGTTGTCC	C	G	40	PASS	NA	GT	0	1	1	1	1	1	1	1	1	0	1	1	1	1	1	0	1	1	1	1	1	1	1	0	1	1	1	1	1	1	1	1	1	1	1	1	1	1	1	1	1
NC_022541	25917	TGTCCTGCTG.CTGCAGCAGT	C	T	40	PASS	NA	GT	0	0	0	0	0	0	0	0	0	0	0	0	0	0	0	0	0	0	0	0	0	0	0	0	0	0	0	0	0	0	0	0	0	0	0	0	0	0	0	0	0
NC_022541	25920	CCTGCTGCTG.CAGCAGTTCC	C	T	40	PASS	NA	GT	0	0	0	0	0	0	0	0	0	0	0	0	0	0	0	0	0	0	0	0	0	0	0	0	0	0	0	0	0	0	0	0	0	0	0	0	0	0	0	0	0
NC_022541	25925	TGCTGCAGCA.GTTCCACGCC	G	A	40	PASS	NA	GT	0	1	1	1	1	1	1	1	1	0	1	1	1	1	1	0	1	1	1	1	1	1	1	0	1	1	1	1	1	1	1	1	1	1	1	1	1	1	1	1	1
NC_022541	25938	CCACGCCGAT.GCCGTCGTAG	G	A	40	PASS	NA	GT	0	0	0	0	0	0	0	0	0	0	0	0	0	0	0	0	0	0	0	0	0	0	0	0	0	0	0	0	0	0	0	0	0	0	0	0	0	0	0	0	0
NC_022541	25950	CGTCGTAGGC.GCCGGTGGCC	G	A	40	PASS	NA	GT	0	0	0	0	0	0	0	0	0	0	0	0	0	0	0	0	0	0	0	0	0	0	0	0	0	0	0	0	0	0	0	0	0	0	0	0	0	0	0	0	0
NC_022541	25962	CGGTGGCCTG.TTCGTCGAAG	T	C	40	PASS	NA	GT	0	0	0	0	0	0	0	0	0	0	0	0	0	0	0	0	0	0	0	0	0	0	0	0	0	0	0	0	0	0	0	0	0	0	0	0	0	0	0	0	0
NC_022541	25971	GTTCGTCGAA.GGCTTCGGCG	G	C	40	PASS	NA	GT	0	0	0	0	0	0	0	0	0	0	0	0	0	0	0	0	0	0	0	0	0	0	0	0	0	0	0	0	0	0	0	0	0	0	0	0	0	0	0	0	0
NC_022541	25980	AGGCTTCGGC.GTCTTCCTTG	G	A	40	PASS	NA	GT	0	1	1	1	1	1	1	1	1	0	1	1	1	1	1	0	1	1	1	1	1	1	1	0	1	1	1	1	1	1	1	1	1	1	1	1	1	1	1	1	1
NC_022541	26010	TGCTGTGCGG.GTCCAGGTCC	G	A	40	PASS	NA	GT	0	0	0	0	0	0	0	0	0	0	0	0	0	0	0	0	0	0	0	0	0	0	0	0	0	0	0	0	0	0	0	0	0	0	0	0	0	0	0	0	0
NC_022541	26019	GGTCCAGGTC.CGAGAGCAGG	C	A	40	PASS	NA	GT	0	0	0	0	0	0	0	0	0	0	0	0	0	0	0	0	0	0	0	0	0	0	0	0	0	0	0	0	0	0	0	0	0	0	0	0	0	0	0	0	0
NC_022541	26028	CCGAGAGCAG.GCCGCGCACG	G	C	40	PASS	NA	GT	0	0	0	0	0	0	0	0	0	0	0	0	0	0	0	0	0	0	0	0	0	0	0	0	0	0	0	0	0	0	0	0	0	0	0	0	0	0	0	0	0
NC_022541	26031	AGAGCAGGCC.GCGCACGGCG	G	A	40	PASS	NA	GT	0	0	0	0	0	0	0	1	1	0	0	1	1	0	1	0	0	1	1	0	0	0	1	0	0	0	0	1	1	1	1	1	1	0	0	0	0	1	1	1	1
NC_022541	26032	GAGCAGGCCG.CGCACGGCGG	C	T	40	PASS	NA	GT	0	0	0	0	0	0	0	0	0	0	0	0	0	0	0	0	0	0	0	0	0	0	0	0	0	0	0	0	0	0	0	0	0	0	0	0	0	0	0	0	0
NC_022541	26040	CGCGCACGGC.GGCGTGCATC	G	C	40	PASS	NA	GT	0	0	0	0	0	0	0	0	0	0	0	0	0	0	0	0	0	0	0	0	0	0	0	0	0	0	0	0	0	0	0	0	0	0	0	0	0	0	0	0	0
NC_022541	26042	CGCACGGCGG.CGTGCATCAG	C	A	40	PASS	NA	GT	0	1	1	1	1	1	1	0	0	0	1	0	0	1	0	0	1	0	0	1	1	1	0	0	1	1	1	0	0	0	0	0	0	1	1	1	1	0	0	0	0
NC_022541	26070	CTTCGACCGG.ATCGACGTAG	A	G	40	PASS	NA	GT	0	1	1	1	1	1	1	1	1	0	1	1	1	1	1	0	1	1	1	1	1	1	1	0	1	1	1	1	1	1	1	1	1	1	1	1	1	1	1	1	1
NC_022541	26076	CCGGATCGAC.GTAGGCCTGC	G	A	40	PASS	NA	GT	0	0	0	0	0	0	0	0	0	0	0	0	0	0	0	0	0	0	0	0	0	0	0	0	0	0	0	0	0	0	0	0	0	0	0	0	0	0	0	0	0
NC_022541	26085	CGTAGGCCTG.CTTGACCGCG	C	T	40	PASS	NA	GT	0	0	1	1	1	1	1	0	0	0	1	0	0	0	0	0	1	0	0	1	1	1	0	0	1	1	0	0	0	0	0	0	0	1	1	0	1	0	0	0	0
NC_022541	26100	CCGCGTTGTA.CACCGCCACG	C	G	40	PASS	NA	GT	0	1	1	1	1	1	1	0	0	0	1	1	1	1	0	0	1	0	0	1	1	1	0	0	1	1	1	0	0	0	0	0	0	1	1	1	1	0	0	0	0
NC_022541	26135	TCCAGCGGCA.CCTTGGACAC	C	T	40	PASS	NA	GT	0	0	0	0	0	0	0	0	0	0	0	0	0	0	0	0	0	0	0	0	0	0	0	0	0	0	0	0	0	0	0	0	0	0	0	0	0	0	0	0	0
NC_022541	26142	GCACCTTGGA.CACAGCGGCT	C	A	40	PASS	NA	GT	0	1	0	0	0	0	0	1	1	0	0	1	1	0	1	0	0	1	1	0	0	0	1	0	0	0	0	1	1	1	1	1	1	0	0	0	0	1	1	1	1
NC_022541	26147	TTGGACACAG.CGGCTTCATT	C	T	40	PASS	NA	GT	0	0	0	0	0	0	0	0	0	0	0	0	0	0	0	0	0	0	0	0	0	0	0	0	0	0	0	0	0	0	0	0	0	0	0	0	0	0	0	0	0
NC_022541	26166	TGGCTTCCGG.ATCGTCCGCG	A	G	40	PASS	NA	GT	0	0	1	1	1	1	1	0	0	0	1	0	0	1	0	0	1	0	0	1	1	1	0	0	1	1	1	0	0	0	0	0	0	1	1	1	1	0	0	0	0
NC_022541	26257	AACGGACAGG.GCGGCTACGC	G	A	40	PASS	NA	GT	0	1	1	1	1	1	1	1	1	0	1	1	1	1	1	0	1	1	1	1	1	1	1	0	1	1	1	1	1	1	1	1	1	1	1	1	1	1	1	1	1
NC_022541	26265	GGGCGGCTAC.GCGCATGAAG	G	A	40	PASS	NA	GT	0	0	0	0	0	0	0	0	0	0	0	0	0	0	0	0	0	0	0	0	0	0	0	0	0	0	0	0	0	0	0	0	0	0	0	0	0	0	0	0	0
NC_022541	26337	CGCGAAGCAG.CGGTAAATCC	C	A	40	PASS	NA	GT	0	0	0	0	0	0	0	0	0	0	0	0	0	0	0	0	0	1	0	0	0	0	0	0	0	0	0	0	0	0	0	0	0	0	0	0	0	0	0	0	0
NC_022541	26357	GCGTTGAATC.GCGGGCGGTG	G	C	40	PASS	NA	GT	0	0	0	0	0	0	0	0	0	0	0	0	0	0	0	0	0	0	0	0	0	0	0	0	0	0	0	0	0	0	0	0	0	0	0	0	0	0	0	0	0
NC_022541	26362	GAATCGCGGG.CGGTGCGCGG	C	T	40	PASS	NA	GT	0	0	0	0	0	0	0	0	0	0	0	0	0	0	0	0	0	0	0	0	0	0	0	0	0	0	0	0	0	0	0	0	0	0	0	0	0	0	0	0	0
NC_022541	26365	TCGCGGGCGG.TGCGCGGCGC	T	C	40	PASS	NA	GT	0	0	0	0	0	0	0	0	0	0	0	0	0	0	0	0	0	0	0	0	0	0	0	0	0	0	0	0	0	0	0	0	0	0	0	0	0	0	0	0	0
NC_022541	26408	ATGGATCCAC.TGGCTGCCCG	T	C	40	PASS	NA	GT	0	1	1	1	1	1	1	1	1	0	1	1	1	1	1	0	1	1	1	1	1	1	1	0	1	1	1	1	1	1	1	1	1	1	1	1	1	1	1	1	1
NC_022541	26423	GCCCGTTGCG.ACGCAATTCG	A	T	40	PASS	NA	GT	0	1	0	0	0	0	0	0	0	0	0	0	0	0	0	0	0	0	0	0	0	0	0	0	0	0	0	0	0	0	0	0	0	0	0	0	0	0	0	0	0
NC_022541	26435	GCAATTCGAA.GTACAGCGCC	G	A	40	PASS	NA	GT	0	0	1	1	1	1	1	0	0	0	1	0	0	1	0	0	1	0	0	1	1	1	0	0	1	1	1	0	0	0	0	0	0	1	1	1	1	0	0	0	0
NC_022541	26440	TCGAAGTACA.GCGCCGGCAC	G	A	40	PASS	NA	GT	0	0	0	0	0	0	0	0	0	0	0	0	0	0	0	0	0	0	0	0	0	0	0	0	0	0	0	0	0	0	0	0	0	0	0	0	0	0	0	0	0
NC_022541	26462	CCTGCCCGCC.CGAACTGCCG	C	G	40	PASS	NA	GT	0	0	1	1	1	1	1	0	0	0	1	0	0	1	0	0	1	0	0	1	1	1	0	0	1	1	1	0	0	0	0	0	0	1	1	1	1	0	0	0	0
NC_022541	26477	TGCCGACCTT.GGCCACCGCG	G	A	40	PASS	NA	GT	0	0	0	0	0	0	0	0	0	0	0	0	0	0	0	0	0	0	0	0	0	0	0	0	0	0	0	0	0	0	0	0	0	0	0	0	0	0	0	0	0
NC_022541	26480	CGACCTTGGC.CACCGCGTCG	C	G,T	40	PASS	NA	GT	0	1	0	0	0	0	0	0	0	0	0	0	0	0	0	0	0	0	0	0	0	0	0	0	0	0	0	0	0	0	0	0	0	0	0	0	0	0	0	0	0
NC_022541	26486	TGGCCACCGC.GTCGCCACGT	G	C	40	PASS	NA	GT	0	0	1	1	1	1	1	0	0	0	1	0	0	1	0	0	1	0	0	1	1	1	0	0	1	1	1	0	0	0	0	0	0	1	1	1	1	0	0	0	0
NC_022541	26492	CCGCGTCGCC.ACGTTTGATC	A	C	40	PASS	NA	GT	0	0	1	1	1	1	1	0	0	0	1	0	0	1	0	0	1	0	0	1	1	1	0	0	1	1	1	0	0	0	0	0	0	1	1	1	1	0	0	0	0
NC_022541	26496	GTCGCCACGT.TTGATCGATG	T	C	40	PASS	NA	GT	0	0	0	0	0	0	0	0	0	0	0	0	0	0	0	0	0	0	0	0	0	0	0	0	0	0	0	0	0	0	0	0	0	0	0	0	0	0	0	0	0
NC_022541	26503	CGTTTGATCG.ATGCGCCGGC	A	T	40	PASS	NA	GT	0	0	0	0	0	0	0	1	1	0	0	0	0	0	1	0	0	1	1	0	0	0	1	0	0	0	0	1	1	1	1	1	1	0	0	0	0	1	1	1	1
NC_022541	26521	GCATCGCGCA.GCAAGGTGTC	G	A	40	PASS	NA	GT	0	0	0	0	0	0	0	0	0	0	0	0	0	0	0	0	0	0	0	0	0	0	0	0	0	0	0	0	0	0	0	0	0	0	0	0	0	0	0	0	0
NC_022541	26540	CGTTATGCGC.GTACAGGCTC	G	A	40	PASS	NA	GT	0	0	0	0	0	0	0	0	0	0	0	0	0	0	0	0	0	0	0	0	0	0	0	0	0	0	0	0	0	0	0	0	0	0	0	0	0	0	0	0	0
NC_022541	26564	AGCCGTTGCC.ATGGTCCACG	A	G	40	PASS	NA	GT	0	1	1	1	1	1	1	1	1	0	1	1	1	1	1	0	1	1	1	1	1	1	1	0	1	1	1	1	1	1	1	1	1	1	1	1	1	1	1	1	1
NC_022541	26633	CATCGGCCAC.TGCAGTCACG	T	C	40	PASS	NA	GT	0	0	1	1	1	1	1	0	0	0	1	0	0	1	0	0	1	0	0	1	1	1	0	0	1	1	1	0	0	0	0	0	0	1	1	1	1	0	0	0	0
NC_022541	26636	CGGCCACTGC.AGTCACGGTG	A	G	40	PASS	NA	GT	0	1	1	1	1	1	1	0	0	0	1	0	0	1	0	0	1	0	0	1	1	1	0	0	1	1	1	0	0	0	0	0	0	1	1	1	1	0	0	0	0
NC_022541	26646	AGTCACGGTG.GTGCCCTTGG	G	C	40	PASS	NA	GT	0	0	1	1	1	1	1	0	0	0	1	0	0	1	0	0	1	0	0	1	1	1	0	0	1	1	1	0	0	0	0	0	0	1	1	1	1	0	0	0	0
NC_022541	26654	TGGTGCCCTT.GGGCGCGCCG	G	A	40	PASS	NA	GT	0	0	0	0	0	0	0	0	0	0	0	0	0	0	0	0	0	0	0	0	0	0	0	0	0	0	0	0	0	0	0	0	0	0	0	0	0	0	0	0	0
NC_022541	27747	CGCCCCAGAC.AACCGCCGCC	A	T	40	PASS	NA	GT	0	1	0	0	0	0	0	0	0	0	0	0	0	0	0	0	0	0	0	0	0	0	0	0	0	0	0	0	0	0	0	0	0	0	0	0	0	0	0	0	0
NC_022541	27751	CCAGACAACC.GCCGCCGCGC	G	A	40	PASS	NA	GT	0	0	1	1	1	1	1	0	0	0	1	0	0	1	0	0	1	0	0	1	1	1	0	0	1	1	1	0	0	0	0	0	0	1	1	1	1	0	0	0	0
NC_022541	27788	CCCAAATTCT.TCTCCTGGCA	T	C	40	PASS	NA	GT	0	1	1	1	1	1	1	0	0	0	1	0	0	1	0	0	1	0	0	1	1	1	0	0	1	1	1	0	0	0	0	0	0	1	1	1	1	0	0	0	0
NC_022541	27792	AATTCTTCTC.CTGGCACTGT	C	T	40	PASS	NA	GT	0	0	0	0	0	0	0	0	0	0	0	0	0	0	0	0	0	0	0	0	0	0	0	0	0	0	0	0	0	0	0	0	0	0	0	0	0	0	0	0	0
NC_022541	27801	CCTGGCACTG.TCCCTGGTCT	T	A	40	PASS	NA	GT	0	0	0	0	0	0	0	0	0	0	0	0	0	0	0	0	0	0	0	0	0	0	0	0	0	0	0	0	0	0	0	0	0	0	0	0	0	0	0	0	0
NC_022541	27804	GGCACTGTCC.CTGGTCTGCA	C	T	40	PASS	NA	GT	0	0	0	0	0	0	0	0	0	0	0	0	0	0	0	0	0	1	0	0	0	0	0	0	0	0	0	0	0	0	0	0	0	0	0	0	0	0	0	0	0
NC_022541	27808	CTGTCCCTGG.TCTGCACAAG	T	C	40	PASS	NA	GT	0	0	0	0	0	0	0	1	1	0	0	0	0	0	1	0	0	0	1	0	0	0	1	0	0	0	0	1	1	1	1	1	0	0	0	0	0	1	1	1	1
NC_022541	27815	TGGTCTGCAC.AAGCGCCTGG	A	G	40	PASS	NA	GT	0	1	1	1	1	1	1	1	1	0	1	1	1	1	1	0	1	1	1	1	1	1	1	0	1	1	1	1	1	1	1	1	1	1	1	1	1	1	1	1	1
NC_022541	27830	CCTGGGCCGA.CGAGGACGTC	C	G,T	40	PASS	NA	GT	0	1	0	0	0	0	0	0	0	0	0	0	0	0	0	0	0	0	0	0	0	0	0	0	0	0	0	0	0	0	0	0	0	0	0	0	0	0	0	0	0
NC_022541	27834	GGCCGACGAG.GACGTCAGCA	G	A	40	PASS	NA	GT	0	0	0	0	0	0	0	0	0	0	0	0	0	0	0	0	0	0	0	0	0	0	0	0	0	0	0	0	0	0	0	0	0	0	0	0	0	0	0	0	0
NC_022541	27856	GTCAACGGCA.AGATCAGCGC	A	G	40	PASS	NA	GT	0	0	1	1	1	1	1	0	0	0	1	0	0	1	0	0	1	0	0	1	1	1	0	0	1	1	1	0	0	0	0	0	0	1	1	1	1	0	0	0	0
NC_022541	27884	GCAAGACCTA.TGGCGCCCTG	T	C	40	PASS	NA	GT	0	1	0	0	0	0	0	0	0	0	0	0	0	0	0	0	0	0	0	0	0	0	0	0	0	0	0	0	0	0	0	0	0	0	0	0	0	0	0	0	0
NC_022541	27890	CCTATGGCGC.CCTGGAAACG	C	T	40	PASS	NA	GT	0	0	0	0	0	0	0	0	0	0	0	0	0	0	0	0	0	0	0	0	0	0	0	0	0	0	0	0	0	0	0	0	0	0	0	0	0	0	0	0	0
NC_022541	27905	AAACGGTCAA.CGGCTCCATC	C	T	40	PASS	NA	GT	0	0	0	0	0	0	0	0	0	0	0	1	1	0	0	0	0	0	0	0	0	0	0	0	0	0	0	0	0	0	0	0	0	0	0	0	0	0	0	0	0
NC_022541	28172	AGGGCATCGA.GACGGTCAAT	G	A	40	PASS	NA	GT	0	0	0	0	0	0	0	0	0	0	0	0	0	0	0	0	0	0	0	0	0	0	0	0	0	0	0	0	0	0	0	0	0	0	0	0	0	0	0	0	0
NC_022541	28181	AGACGGTCAA.TGGCGACATC	T	C	40	PASS	NA	GT	0	1	1	1	1	1	1	0	0	0	1	0	0	1	0	0	1	0	0	1	1	1	0	0	1	1	1	0	0	0	0	0	0	1	1	1	1	0	0	0	0
NC_022541	28187	TCAATGGCGA.CATCACGGTC	C	T	40	PASS	NA	GT	0	0	1	1	1	1	1	0	0	0	1	0	0	1	0	0	1	0	0	1	1	1	0	0	1	1	1	0	0	0	0	0	0	1	1	1	1	0	0	0	0
NC_022541	28193	GCGACATCAC.GGTCGGGGTG	G	T	40	PASS	NA	GT	0	1	0	0	0	0	0	1	1	0	0	1	1	0	1	0	0	1	1	0	0	0	1	0	0	0	0	1	1	1	1	1	1	0	0	0	0	1	1	1	1
NC_022541	28202	CGGTCGGGGT.GGGCTCGCAT	G	A	40	PASS	NA	GT	0	0	0	0	0	0	0	0	0	0	0	0	0	0	0	0	0	0	0	0	0	0	0	0	0	0	0	0	0	0	0	0	1	0	0	0	0	0	0	0	0
NC_022541	28205	TCGGGGTGGG.CTCGCATGTG	C	G	40	PASS	NA	GT	0	1	0	0	0	0	0	0	0	0	0	0	0	0	0	0	0	0	0	0	0	0	0	0	0	0	0	0	0	0	0	0	0	0	0	0	0	0	0	0	0
NC_022541	28211	TGGGCTCGCA.TGTGCGCGGC	T	C	40	PASS	NA	GT	0	0	0	0	0	0	0	0	0	0	0	0	0	0	0	0	0	0	0	0	0	0	0	0	0	0	0	0	0	0	0	0	0	0	0	0	0	0	0	0	0
NC_022541	28220	ATGTGCGCGG.CGGCATCGAA	C	T	40	PASS	NA	GT	0	0	0	0	0	0	0	0	0	0	0	0	0	0	0	0	0	0	0	0	0	0	0	0	0	0	0	0	0	0	0	0	0	0	0	0	0	0	0	0	0
NC_022541	28280	GCAAGCCGCG.TGTGGTGATC	T	C	40	PASS	NA	GT	0	1	0	0	0	0	0	0	0	0	0	0	0	0	0	0	0	0	0	0	0	0	0	0	0	0	0	0	0	0	0	0	0	0	0	0	0	0	0	0	0
NC_022541	28297	ATCGGCCCGG.ATGCGGTGGT	A	G	40	PASS	NA	GT	0	0	0	0	0	0	0	0	0	0	0	0	0	0	0	0	0	0	0	0	0	0	0	0	0	0	0	0	0	0	0	0	0	0	0	0	0	0	0	0	0
NC_022541	28301	GCCCGGATGC.GGTGGTCGAT	G	A	40	PASS	NA	GT	0	0	0	0	0	0	0	1	1	0	0	1	1	0	1	0	0	1	1	0	0	0	1	0	0	0	0	1	1	1	1	1	1	0	0	0	0	1	1	1	1
NC_022541	28307	ATGCGGTGGT.CGATGGGCCG	C	T	40	PASS	NA	GT	0	0	1	1	1	1	1	0	0	0	1	0	0	0	0	0	1	0	0	1	1	1	0	0	1	1	0	0	0	0	0	0	0	1	1	0	1	0	0	0	0
NC_022541	28318	GATGGGCCGT.TGCACTTCGA	T	C	40	PASS	NA	GT	0	0	0	0	0	0	0	0	0	0	0	0	0	0	0	0	0	0	0	0	0	0	0	0	0	0	0	0	0	0	0	0	0	0	0	0	0	0	0	0	0
NC_022541	28346	TCAACCTGTA.CGTGCACCGC	C	T	40	PASS	NA	GT	0	0	0	0	0	0	0	0	0	0	0	0	0	0	0	0	0	0	0	0	0	0	0	0	0	0	0	0	0	0	0	0	1	0	0	0	0	0	0	0	0
NC_022541	28352	TGTACGTGCA.CCGCAGCGCC	C	T	40	PASS	NA	GT	0	0	0	0	0	0	0	0	0	0	0	0	0	0	0	0	0	0	0	0	0	0	0	0	0	0	0	0	0	0	0	0	0	0	0	0	0	0	0	0	0
NC_022541	28371	CAAGATCGGC.GCGGTGAGCG	G	C	40	PASS	NA	GT	0	0	0	0	0	0	0	0	0	0	0	0	0	0	0	0	0	0	0	0	0	0	0	0	0	0	0	0	0	0	0	0	0	0	0	0	0	0	0	0	0
NC_022541	31717	CACCGCATTG.TTGGCGGTGC	T	C	40	PASS	NA	GT	0	0	0	0	0	0	0	0	0	0	0	0	0	0	0	0	0	0	0	0	0	0	0	0	0	0	0	0	0	0	0	0	0	0	0	0	0	0	0	0	0
NC_022541	31718	ACCGCATTGT.TGGCGGTGCC	T	C	40	PASS	NA	GT	0	0	0	0	0	0	0	0	0	0	0	0	0	0	0	0	0	0	0	0	0	0	0	0	0	0	0	0	0	0	0	0	0	0	0	0	0	0	0	0	0
NC_022541	31722	CATTGTTGGC.GGTGCCGAAT	G	A	40	PASS	NA	GT	0	0	0	0	0	0	0	0	0	0	0	0	0	1	0	0	0	0	0	0	0	0	0	0	0	0	1	0	0	0	0	0	0	0	0	1	0	0	0	0	0
NC_022541	31723	ATTGTTGGCG.GTGCCGAATT	G	C	40	PASS	NA	GT	0	0	0	0	0	0	0	0	0	0	0	0	0	0	0	0	0	0	0	0	0	0	0	0	0	0	0	0	0	0	0	0	0	0	0	0	0	0	0	0	0
NC_022541	31734	TGCCGAATTC.GGCCAGAAAG	G	A	40	PASS	NA	GT	0	0	0	0	0	0	0	0	0	0	0	0	0	1	0	0	0	0	0	0	0	0	0	0	0	0	1	0	0	0	0	0	0	0	0	1	0	0	0	0	0
NC_022541	31735	GCCGAATTCG.GCCAGAAAGC	G	C	40	PASS	NA	GT	0	1	0	0	0	0	0	0	0	0	0	0	0	0	0	0	0	0	0	0	0	0	0	0	0	0	0	0	0	0	0	0	0	0	0	0	0	0	0	0	0
NC_022541	31737	CGAATTCGGC.CAGAAAGCCG	C	A	40	PASS	NA	GT	0	0	0	0	0	0	0	0	0	0	0	0	0	0	0	0	0	0	0	0	0	0	0	0	0	0	0	0	0	0	0	0	0	0	0	0	0	0	0	0	0
NC_022541	31739	AATTCGGCCA.GAAAGCCGCG	G	A	40	PASS	NA	GT	0	0	0	0	0	0	0	0	0	0	0	0	0	1	0	0	0	0	0	0	0	0	0	0	0	0	1	0	0	0	0	0	0	0	0	1	0	0	0	0	0
NC_022541	31749	GAAAGCCGCG.CTTGCGGTTG	C	T	40	PASS	NA	GT	0	0	1	1	1	1	1	0	0	0	1	0	0	0	0	0	1	0	0	1	1	1	0	0	1	1	0	0	0	0	0	0	0	1	1	0	1	0	0	0	0
NC_022541	31754	CCGCGCTTGC.GGTTGGTGCG	G	C	40	PASS	NA	GT	0	0	1	1	1	1	1	0	0	0	1	0	0	1	0	0	1	0	0	1	1	1	0	0	1	1	1	0	0	0	0	0	0	1	1	1	1	0	0	0	0
NC_022541	31764	GGTTGGTGCG.CAGCCACTGC	C	A	40	PASS	NA	GT	0	0	0	0	0	0	0	0	0	0	0	0	0	0	0	0	0	1	0	0	0	0	0	0	0	0	0	0	0	0	0	0	0	0	0	0	0	0	0	0	0
NC_022541	31773	GCAGCCACTG.CGTGAAGTTG	C	G	40	PASS	NA	GT	0	0	0	0	0	0	0	0	0	0	0	0	0	0	0	0	0	0	0	0	0	0	0	0	0	0	0	0	0	0	0	0	0	0	0	0	0	0	0	0	0
NC_022541	31776	GCCACTGCGT.GAAGTTGCGC	G	A	40	PASS	NA	GT	0	0	1	1	1	1	1	0	0	0	1	0	0	1	0	0	1	0	0	1	1	1	0	0	1	1	1	0	0	0	0	0	0	1	1	1	1	0	0	0	0
NC_022541	31779	ACTGCGTGAA.GTTGCGCAGG	G	A	40	PASS	NA	GT	0	0	0	0	0	0	0	0	0	0	0	0	0	0	0	0	0	0	0	0	0	0	0	0	0	0	0	0	0	0	0	0	0	0	0	0	0	0	0	0	0
NC_022541	31784	GTGAAGTTGC.GCAGGCGCTC	G	T	40	PASS	NA	GT	0	0	0	0	0	0	0	0	0	0	0	0	0	0	0	0	0	0	0	0	0	0	0	0	0	0	0	0	0	0	0	0	0	0	0	0	0	0	0	0	0
NC_022541	31788	AGTTGCGCAG.GCGCTCGGCG	G	A	40	PASS	NA	GT	0	0	0	0	0	0	0	0	0	0	0	0	0	0	0	0	0	0	0	0	0	0	0	0	0	0	0	0	0	0	0	0	0	0	0	0	0	0	0	0	0
NC_022541	31800	GCTCGGCGCC.AATGGTGCTG	A	G	40	PASS	NA	GT	0	1	0	0	0	0	0	0	0	0	0	0	0	0	0	0	0	0	0	0	0	0	0	0	0	0	0	0	0	0	0	0	0	0	0	0	0	0	0	0	0
NC_022541	31812	TGGTGCTGCT.GACACAGGTG	G	T	40	PASS	NA	GT	0	0	0	0	0	0	0	0	0	0	0	0	0	0	0	0	0	0	0	0	0	0	0	0	0	0	0	0	0	0	0	0	0	0	0	0	0	0	0	0	0
NC_022541	31813	GGTGCTGCTG.ACACAGGTGC	A	G	40	PASS	NA	GT	0	0	0	0	0	0	0	0	0	0	0	0	0	0	0	0	0	0	0	0	0	0	0	0	0	0	0	0	0	0	0	0	0	0	0	0	0	0	0	0	0
NC_022541	31815	TGCTGCTGAC.ACAGGTGCTG	A	G	40	PASS	NA	GT	0	0	1	1	1	1	1	0	0	0	1	0	0	1	0	0	1	0	0	1	1	1	0	0	1	1	1	0	0	0	0	0	0	1	1	1	1	0	0	0	0
NC_022541	31821	TGACACAGGT.GCTGCTGGTG	G	A	40	PASS	NA	GT	0	0	0	0	0	0	0	0	0	0	0	0	0	0	0	0	0	0	0	0	0	0	0	0	0	0	0	0	0	0	0	0	0	0	0	0	0	0	0	0	0
NC_022541	31822	GACACAGGTG.CTGCTGGTGC	C	G	40	PASS	NA	GT	0	0	0	0	0	0	0	0	0	0	0	0	0	0	0	0	0	0	0	0	0	0	0	0	0	0	0	0	0	0	0	0	0	0	0	0	0	0	0	0	0
NC_022541	31824	CACAGGTGCT.GCTGGTGCCG	G	A	40	PASS	NA	GT	0	0	1	1	1	1	1	0	0	0	1	0	0	1	0	0	1	0	0	1	1	1	0	0	1	1	1	0	0	0	0	0	0	1	1	1	1	0	0	0	0
NC_022541	31845	TGGAATCGGC.ATCCAGATAC	A	G	40	PASS	NA	GT	0	0	0	0	0	0	0	0	0	0	0	0	0	0	0	0	0	0	0	0	0	0	0	0	0	0	0	0	0	0	0	0	0	0	0	0	0	0	0	0	0
NC_022541	31854	CATCCAGATA.CTGATGCACT	C	T	40	PASS	NA	GT	0	0	1	1	1	1	1	0	0	0	1	0	0	1	0	0	1	0	0	1	1	1	0	0	1	1	1	0	0	0	0	0	0	1	1	1	1	0	0	0	0
NC_022541	31857	CCAGATACTG.ATGCACTTCG	A	G	40	PASS	NA	GT	0	1	0	0	0	0	0	0	0	0	0	0	0	0	0	0	0	0	0	0	0	0	0	0	0	0	0	0	0	0	0	0	0	0	0	0	0	0	0	0	0
NC_022541	31863	ACTGATGCAC.TTCGAAGGCG	T	C	40	PASS	NA	GT	0	0	1	1	1	1	1	0	0	0	1	0	0	1	0	0	1	0	0	1	1	1	0	0	1	1	1	0	0	0	0	0	0	1	1	1	1	0	0	0	0
NC_022541	31880	GCGTAGCGAT.CGAGCGGGTC	C	T	40	PASS	NA	GT	0	1	1	1	1	1	1	0	0	0	1	0	0	1	0	0	1	0	0	1	1	1	0	0	1	1	1	0	0	0	0	0	0	1	1	1	1	0	0	0	0
NC_022541	31890	CGAGCGGGTC.GTAGATGGAC	G	A	40	PASS	NA	GT	0	0	0	0	0	0	0	0	0	0	0	0	0	0	0	0	0	0	0	0	0	0	0	0	0	0	0	0	0	0	0	0	0	0	0	0	0	0	0	0	0
NC_022541	31892	AGCGGGTCGT.AGATGGACGT	A	C	40	PASS	NA	GT	0	0	0	0	0	0	0	0	0	0	0	0	0	0	0	0	0	0	0	0	0	0	0	0	0	0	0	0	0	0	0	0	0	0	0	0	0	0	0	0	0
NC_022541	31896	GGTCGTAGAT.GGACGTCAGC	G	A	40	PASS	NA	GT	0	0	0	0	0	0	0	0	0	0	0	0	0	0	0	0	0	0	0	0	0	0	0	0	0	0	0	0	0	0	0	0	0	0	0	0	0	0	0	0	0
NC_022541	31898	TCGTAGATGG.ACGTCAGCGC	A	C	40	PASS	NA	GT	0	1	0	0	0	0	0	0	0	0	0	0	0	0	0	0	0	0	0	0	0	0	0	0	0	0	0	0	0	0	0	0	0	0	0	0	0	0	0	0	0
NC_022541	31899	CGTAGATGGA.CGTCAGCGCG	C	G	40	PASS	NA	GT	0	1	0	0	0	0	0	0	0	0	0	0	0	0	0	0	0	0	0	0	0	0	0	0	0	0	0	0	0	0	0	0	0	0	0	0	0	0	0	0	0
NC_022541	31901	TAGATGGACG.TCAGCGCGGT	T	C	40	PASS	NA	GT	0	0	0	0	0	0	0	0	0	0	0	0	0	0	0	0	0	0	0	0	0	0	0	0	0	0	0	0	0	0	0	0	0	0	0	0	0	0	0	0	0
NC_022541	31920	TGGCGTTGGA.GTAGCCATCG	G	A	40	PASS	NA	GT	0	1	0	0	0	0	0	0	0	0	0	0	0	0	0	0	0	0	0	0	0	0	0	0	0	0	0	0	0	0	0	0	0	0	0	0	0	0	0	0	0
NC_022541	31930	GTAGCCATCG.TTCGTGGTGG	T	C,G	40	PASS	NA	GT	0	1	2	2	2	2	2	0	0	0	2	0	0	2	0	0	2	0	0	2	2	2	0	0	2	2	2	0	0	0	0	0	0	2	2	2	2	0	0	0	0
NC_022541	31932	AGCCATCGTT.CGTGGTGGAA	C	G,T	40	PASS	NA	GT	0	0	0	0	0	0	0	0	0	0	0	0	0	0	0	0	0	0	0	0	0	0	0	0	0	0	0	0	0	0	0	0	0	0	0	0	0	0	0	0	0
NC_022541	31937	TCGTTCGTGG.TGGAATACCA	T	G	40	PASS	NA	GT	0	1	1	1	1	1	1	0	0	0	1	0	0	1	0	0	1	0	0	1	1	1	0	0	1	1	1	0	0	0	0	0	0	1	1	1	1	0	0	0	0
NC_022541	31950	AATACCAACT.GTGCGCGCCG	G	A	40	PASS	NA	GT	0	0	0	0	0	0	0	1	1	0	0	0	0	0	1	0	0	0	1	0	0	0	1	0	0	0	0	1	1	1	1	1	0	0	0	0	0	1	1	1	1
NC_022541	31956	AACTGTGCGC.GCCGGTCCAC	G	A	40	PASS	NA	GT	0	0	1	1	1	1	1	0	0	0	1	0	0	1	0	0	1	0	0	1	1	1	0	0	1	1	1	0	0	0	0	0	0	1	1	1	1	0	0	0	0
NC_022541	31963	CGCGCCGGTC.CACAATGCGC	C	G	40	PASS	NA	GT	0	0	0	0	0	0	0	0	0	0	0	0	0	0	0	0	0	1	0	0	0	0	0	0	0	0	0	0	0	0	0	0	0	0	0	0	0	0	0	0	0
NC_022541	31969	GGTCCACAAT.GCGCCGGGCA	G	T	40	PASS	NA	GT	0	0	0	0	0	0	0	0	1	0	0	0	0	0	0	0	0	0	0	0	0	0	0	0	0	0	0	0	0	0	0	0	0	0	0	0	0	0	1	0	0
NC_022541	31977	ATGCGCCGGG.CACCAGAATC	C	T	40	PASS	NA	GT	0	0	1	1	1	1	1	0	0	0	1	0	0	1	0	0	1	0	0	1	1	1	0	0	1	1	1	0	0	0	0	0	0	1	1	1	1	0	0	0	0
NC_022541	31983	CGGGCACCAG.AATCAGGTTA	A	G	40	PASS	NA	GT	0	0	0	0	0	0	0	0	0	0	0	0	0	0	0	0	0	0	0	0	0	0	0	0	0	0	0	0	0	0	0	0	0	0	0	0	0	0	0	0	0
NC_022541	31992	GAATCAGGTT.ATTGGCGCCG	A	C	40	PASS	NA	GT	0	0	0	0	0	0	0	0	0	0	0	0	0	0	0	0	0	0	0	0	0	0	0	0	0	0	0	0	0	0	0	0	0	0	0	0	0	0	0	0	0
NC_022541	31998	GGTTATTGGC.GCCGGTCCTG	G	A	40	PASS	NA	GT	0	1	1	1	1	1	1	1	1	0	1	1	1	1	1	0	1	1	1	1	1	1	1	0	1	1	1	1	1	1	1	1	1	1	1	1	1	1	1	1	1
NC_022541	32004	TGGCGCCGGT.CCTGCGGATG	C	T	40	PASS	NA	GT	0	0	0	0	0	0	0	0	0	0	0	0	0	0	0	0	0	0	0	0	0	0	0	0	0	0	0	0	0	0	0	0	0	0	0	0	0	0	0	0	0
NC_022541	32013	TCCTGCGGAT.GGCATCGATG	G	C	40	PASS	NA	GT	0	0	0	0	0	0	0	0	0	0	0	0	0	0	0	0	0	0	0	0	0	0	0	0	0	0	0	0	0	0	0	0	0	0	0	0	0	0	0	0	0
NC_022541	32046	CGCCGGCCCA.TTCGCTGGCC	T	G	40	PASS	NA	GT	0	0	0	0	0	0	0	1	1	0	0	0	0	0	1	0	0	0	1	0	0	0	1	0	0	0	0	1	1	1	1	1	0	0	0	0	0	1	1	1	1
NC_022541	32048	CCGGCCCATT.CGCTGGCCGA	C	G	40	PASS	NA	GT	0	0	0	0	0	0	0	0	0	0	0	0	0	0	0	0	0	0	0	0	0	0	0	0	0	0	0	0	0	0	0	0	0	0	0	0	0	0	0	0	0
NC_022541	32061	TGGCCGAAAT.ATTGTTGGGT	A	G	40	PASS	NA	GT	0	0	1	1	1	1	1	0	0	0	1	0	0	1	0	0	1	0	0	1	1	1	0	0	1	1	1	0	0	0	0	0	0	1	1	1	1	0	0	0	0
NC_022541	32062	GGCCGAAATA.TTGTTGGGTT	T	C	40	PASS	NA	GT	0	0	0	0	0	0	0	0	0	0	0	0	0	0	0	0	0	0	0	0	0	0	0	0	0	0	0	0	0	0	0	0	0	0	0	0	0	0	0	0	0
NC_022541	32070	TATTGTTGGG.TTCATTCATC	T	C	40	PASS	NA	GT	0	1	1	1	1	1	1	1	1	0	1	1	1	1	1	0	1	1	1	1	1	1	1	0	1	1	1	1	1	1	1	1	1	1	1	1	1	1	1	1	1
NC_022541	32095	GAACATCACC.GCGTTGTCGC	G	A	40	PASS	NA	GT	0	0	0	0	0	0	0	0	0	0	0	0	0	0	0	0	0	0	0	0	0	0	0	0	0	0	0	0	0	0	0	0	0	0	0	0	0	0	0	0	0
NC_022541	32096	AACATCACCG.CGTTGTCGCT	C	T	40	PASS	NA	GT	0	0	0	0	0	0	0	0	0	0	1	0	0	0	0	0	0	0	0	0	0	0	0	0	0	0	0	0	0	0	0	0	0	0	1	0	0	0	0	0	0
NC_022541	32106	CGTTGTCGCT.GTTGAACACC	G	T	40	PASS	NA	GT	0	0	0	0	0	0	0	0	0	0	0	0	0	0	0	0	0	0	0	0	0	0	0	0	0	0	0	0	0	0	0	0	0	0	0	0	0	0	0	0	0
NC_022541	32112	CGCTGTTGAA.CACCAGTGCG	C	T	40	PASS	NA	GT	0	0	0	0	0	0	0	0	0	0	0	0	0	0	0	0	0	0	0	0	0	0	0	0	0	0	0	0	0	0	0	0	0	0	0	0	0	0	0	0	0
NC_022541	32113	GCTGTTGAAC.ACCAGTGCGA	A	G	40	PASS	NA	GT	0	1	0	0	0	0	0	1	1	0	0	1	1	0	1	0	0	1	1	0	0	0	1	0	0	0	0	1	1	1	1	1	1	0	0	0	0	1	1	1	1
NC_022541	32118	TGAACACCAG.TGCGAGACGA	T	C	40	PASS	NA	GT	0	1	0	0	0	0	0	0	0	0	0	0	0	0	0	0	0	0	0	0	0	0	0	0	0	0	0	0	0	0	0	0	0	0	0	0	0	0	0	0	0
NC_022541	32121	ACACCAGTGC.GAGACGACGC	G	C	40	PASS	NA	GT	0	1	0	0	0	0	0	0	0	0	0	0	0	0	0	0	0	0	0	0	0	0	0	0	0	0	0	0	0	0	0	0	0	0	0	0	0	0	0	0	0
NC_022541	32133	GACGACGCCA.TAGATCGGTG	T	G	40	PASS	NA	GT	0	1	0	0	0	0	0	0	0	0	0	0	0	0	0	0	0	0	0	0	0	0	0	0	0	0	0	0	0	0	0	0	0	0	0	0	0	0	0	0	0
NC_022541	32142	ATAGATCGGT.GAACGTTGCC	G	A	40	PASS	NA	GT	0	1	1	1	1	1	1	1	1	0	1	1	1	1	1	0	1	1	1	1	1	1	1	0	1	1	1	1	1	1	1	1	1	1	1	1	1	1	1	1	1
NC_022541	32148	CGGTGAACGT.TGCCACCGGT	T	G	40	PASS	NA	GT	0	1	1	1	1	1	1	1	1	0	1	1	1	1	1	0	1	1	1	1	1	1	1	0	1	1	1	1	1	1	1	1	1	1	1	1	1	1	1	1	1
NC_022541	32150	GTGAACGTTG.CCACCGGTAC	C	T	40	PASS	NA	GT	0	0	1	1	1	1	1	0	0	0	1	1	1	1	0	0	1	0	0	1	1	1	0	0	1	1	1	0	0	0	0	0	0	1	1	1	1	0	0	0	0
NC_022541	32165	GGTACTTCCG.GGCTGCCGAT	G	C	40	PASS	NA	GT	0	0	1	1	1	1	1	0	0	0	1	0	0	1	0	0	1	0	0	1	1	1	0	0	1	1	1	0	0	0	0	0	0	1	1	1	1	0	0	0	0
NC_022541	32168	ACTTCCGGGC.TGCCGATCTT	T	C	40	PASS	NA	GT	0	1	0	0	0	0	0	0	0	0	0	0	0	0	0	0	0	0	0	0	0	0	0	0	0	0	0	0	0	0	0	0	0	0	0	0	0	0	0	0	0
NC_022541	35066	TACTTGCTCA.GGATCGCCAT	G	A	40	PASS	NA	GT	0	0	1	1	1	1	1	0	0	0	1	0	0	0	0	0	1	0	0	1	1	1	0	0	1	1	0	0	0	0	0	0	0	1	1	0	1	0	0	0	0
NC_022541	35082	CCATCTGCGG.TTTGTCGCTG	T	C	40	PASS	NA	GT	0	1	1	1	1	1	1	1	1	0	1	1	1	1	1	0	1	1	1	1	1	1	1	0	1	1	1	1	1	1	1	1	1	1	1	1	1	1	1	1	1
NC_022541	35098	GCTGCCGTCC.TTGCCCGGCT	T	G	40	PASS	NA	GT	0	0	0	0	0	0	0	0	0	0	0	0	0	0	0	0	0	0	0	0	0	0	0	0	0	0	0	0	0	0	0	0	0	0	0	0	0	0	0	0	0
NC_022541	35103	CGTCCTTGCC.CGGCTGCACG	C	G	40	PASS	NA	GT	0	0	0	0	0	0	0	0	0	0	0	0	0	0	0	0	0	0	0	0	0	0	0	0	0	0	0	0	0	0	0	0	0	0	0	0	0	0	0	0	0
NC_022541	35106	CCTTGCCCGG.CTGCACGGTG	C	T	40	PASS	NA	GT	0	1	0	0	0	0	0	1	1	0	0	1	1	0	1	0	0	1	1	0	0	0	1	0	0	0	0	1	1	1	1	1	1	0	0	0	0	1	1	1	1
NC_022541	35113	CGGCTGCACG.GTGAAGGGGT	G	T	40	PASS	NA	GT	0	1	0	0	0	0	0	0	0	0	0	0	0	0	0	0	0	1	0	0	0	0	0	0	0	0	0	0	0	0	0	0	0	0	0	0	0	0	0	0	0
NC_022541	35121	CGGTGAAGGG.GTAGTCCGGC	G	A	40	PASS	NA	GT	0	1	0	0	0	0	0	1	1	0	0	1	1	0	1	0	0	1	1	0	0	0	1	0	0	0	0	1	1	1	1	1	1	0	0	0	0	1	1	1	1
NC_022541	35139	GCTTCCACCA.GGAACCCGCC	G	C	40	PASS	NA	GT	0	0	0	0	0	0	0	1	1	0	0	1	1	0	1	0	0	1	1	0	0	0	1	0	0	0	0	1	1	1	1	1	1	0	0	0	0	1	1	1	1
NC_022541	35141	TTCCACCAGG.AACCCGCCGC	A	C	40	PASS	NA	GT	0	1	0	0	0	0	0	1	1	0	0	1	1	0	1	0	0	1	1	0	0	0	1	0	0	0	0	1	1	1	1	1	1	0	0	0	0	1	1	1	1
NC_022541	35142	TCCACCAGGA.ACCCGCCGCC	A	G	40	PASS	NA	GT	0	1	0	0	0	0	0	1	1	0	0	1	1	0	1	0	0	1	1	0	0	0	1	0	0	0	0	1	1	1	1	1	1	0	0	0	0	1	1	1	1
NC_022541	35145	ACCAGGAACC.CGCCGCCCAC	C	G	40	PASS	NA	GT	0	0	1	1	1	1	1	0	0	0	1	0	0	1	0	0	1	0	0	1	1	1	0	0	1	1	1	0	0	0	0	0	0	1	1	1	1	0	0	0	0
NC_022541	35159	GCCCACCAGG.TCCAGCCCAG	T	C	40	PASS	NA	GT	0	0	0	0	0	0	0	0	0	0	0	0	0	1	0	0	0	0	0	0	0	0	0	0	0	0	1	0	0	0	0	0	0	0	0	1	0	0	0	0	0
NC_022541	35180	CACACGTCGC.TGTTCTTTTC	T	C	40	PASS	NA	GT	0	0	0	0	0	0	0	0	0	0	0	0	0	0	0	0	0	0	0	0	0	0	0	0	0	0	0	0	0	0	0	0	0	0	0	0	0	0	0	0	0
NC_022541	35229	TGTCGCAGAC.CGGATTGTTG	C	G	40	PASS	NA	GT	0	0	1	1	1	1	1	0	0	0	1	0	0	1	0	0	1	0	0	1	1	1	0	0	1	1	1	0	0	0	0	0	0	1	1	1	1	0	0	0	0
NC_022541	35236	GACCGGATTG.TTGGCCGTGG	T	C	40	PASS	NA	GT	0	0	0	0	0	0	0	0	0	0	0	0	0	0	0	0	0	0	0	0	0	0	0	0	0	0	0	0	0	0	0	0	0	0	0	0	0	0	0	0	0
NC_022541	35247	TGGCCGTGGC.GAATTCGCCC	G	A	40	PASS	NA	GT	0	0	0	0	0	0	0	0	0	0	0	0	0	1	0	0	0	0	0	0	0	0	0	0	0	0	1	0	0	0	0	0	0	0	0	1	0	0	0	0	0
NC_022541	35256	CGAATTCGCC.CAGAAAGCCT	C	A	40	PASS	NA	GT	0	0	0	0	0	0	0	0	0	0	0	0	0	0	0	0	0	0	0	0	0	0	0	0	0	0	0	0	0	0	0	0	0	0	0	0	0	0	0	0	0
NC_022541	35259	ATTCGCCCAG.AAAGCCTTTC	A	G	40	PASS	NA	GT	0	0	0	0	0	0	0	1	1	0	0	0	0	0	1	0	0	0	1	0	0	0	1	0	0	0	0	1	1	1	1	1	1	0	0	0	0	1	1	1	1
NC_022541	35262	CGCCCAGAAA.GCCTTTCTGC	G	A	40	PASS	NA	GT	0	1	0	0	0	0	0	0	0	0	0	0	0	0	0	0	0	0	0	0	0	0	0	0	0	0	0	0	0	0	0	0	0	0	0	0	0	0	0	0	0
NC_022541	35265	CCAGAAAGCC.TTTCTGCTTG	T	C	40	PASS	NA	GT	0	1	1	1	1	1	1	1	1	0	1	1	1	1	1	0	1	1	1	1	1	1	1	0	1	1	1	1	1	1	1	1	1	1	1	1	1	1	1	1	1
NC_022541	35285	TTCTCGCGCA.GCCACGAGGT	G	A	40	PASS	NA	GT	0	1	0	0	0	0	0	0	0	0	0	0	0	0	0	0	0	1	0	0	0	0	0	0	0	0	0	0	0	0	0	0	0	0	0	0	0	0	0	0	0
NC_022541	35292	GCAGCCACGA.GGTGAAGCCC	G	A	40	PASS	NA	GT	0	1	0	0	0	0	0	0	0	0	0	0	0	0	0	0	0	1	0	0	0	0	0	0	0	0	0	0	0	0	0	0	0	0	0	0	0	0	0	0	0
NC_022541	35299	CGAGGTGAAG.CCCTGCAGCT	C	T	40	PASS	NA	GT	0	0	0	0	0	0	0	0	0	0	0	0	0	0	0	0	0	0	0	0	0	0	0	0	0	0	0	0	0	0	0	0	0	0	0	0	0	0	0	0	0
NC_022541	35307	AGCCCTGCAG.CTTTTCTTGG	C	T	40	PASS	NA	GT	0	0	0	0	0	0	0	0	0	0	0	0	0	0	0	0	0	0	0	0	0	0	0	0	0	0	0	0	0	0	0	0	0	0	0	0	0	0	0	0	0
NC_022541	35319	TTTCTTGGCC.TACCGAATCG	T	G	40	PASS	NA	GT	0	0	1	1	1	1	1	0	0	0	1	0	0	1	0	0	1	0	0	1	1	1	0	0	1	1	1	0	0	0	0	0	0	1	1	1	1	0	0	0	0
NC_022541	35325	GGCCTACCGA.ATCGCTGGTG	A	G	40	PASS	NA	GT	0	1	1	1	1	1	1	0	0	0	1	0	0	1	0	0	1	1	0	1	1	1	0	0	1	1	1	0	0	0	0	0	0	1	1	1	1	0	0	0	0
NC_022541	35332	CGAATCGCTG.GTGCATACCG	G	A	40	PASS	NA	GT	0	0	1	1	1	1	1	0	0	0	1	0	0	1	0	0	1	0	0	1	1	1	0	0	1	1	1	0	0	0	0	0	0	1	1	1	1	0	0	0	0
NC_022541	35337	CGCTGGTGCA.TACCGGCTTG	T	C	40	PASS	NA	GT	0	1	0	0	0	0	0	0	0	0	0	0	0	0	0	0	0	1	0	0	0	0	0	0	0	0	0	0	0	0	0	0	0	0	0	0	0	0	0	0	0
NC_022541	35361	CGCTGTAGTC.TTTATCCAGG	T	C	40	PASS	NA	GT	0	1	1	1	1	1	1	1	1	0	1	1	1	1	1	0	1	1	1	1	1	1	1	0	1	1	1	1	1	1	1	1	1	1	1	1	1	1	1	1	1
NC_022541	35364	TGTAGTCTTT.ATCCAGGTAT	A	G	40	PASS	NA	GT	0	1	1	1	1	1	1	0	0	0	1	0	0	1	0	0	1	1	0	1	1	1	0	0	1	1	1	0	0	0	0	0	0	1	1	1	1	0	0	0	0
NC_022541	35370	CTTTATCCAG.GTATTGATGC	G	A	40	PASS	NA	GT	0	0	1	1	1	1	1	0	0	0	1	1	1	1	0	0	1	0	0	1	1	1	0	0	1	1	1	0	0	0	0	0	0	1	1	1	1	0	0	0	0
NC_022541	35373	TATCCAGGTA.TTGATGCGCC	T	C	40	PASS	NA	GT	0	1	0	0	0	0	0	0	0	0	0	0	0	0	0	0	0	1	0	0	0	0	0	0	0	0	0	0	0	0	0	0	0	0	0	0	0	0	0	0	0
NC_022541	35376	CCAGGTATTG.ATGCGCCTCG	A	G	40	PASS	NA	GT	0	0	0	0	0	0	0	0	0	0	0	0	0	0	0	0	0	0	0	0	0	0	0	0	0	0	0	0	0	0	0	0	0	0	0	0	0	0	0	0	0
NC_022541	35382	ATTGATGCGC.CTCGAAGGCC	C	T	40	PASS	NA	GT	0	1	1	1	1	1	1	1	1	0	1	1	1	1	1	0	1	1	1	1	1	1	1	0	1	1	1	1	1	1	1	1	1	1	1	1	1	1	1	1	1
NC_022541	35391	CCTCGAAGGC.CAGGTTGTTG	C	A	40	PASS	NA	GT	0	0	0	0	0	0	0	1	1	0	0	0	0	0	1	0	0	0	1	0	0	0	1	0	0	0	0	1	1	1	1	1	1	0	0	0	0	1	1	1	1
NC_022541	35400	CCAGGTTGTT.GCCCGGGTCC	G	A	40	PASS	NA	GT	0	0	0	0	0	0	0	1	1	0	0	0	0	0	1	0	0	0	1	0	0	0	1	0	0	0	0	1	1	1	1	1	1	0	0	0	0	1	1	1	1
NC_022541	35405	TTGTTGCCCG.GGTCCTTGAG	G	A	40	PASS	NA	GT	0	0	0	0	0	0	0	0	0	0	0	0	0	0	0	0	0	0	0	0	0	0	0	0	0	0	0	0	0	0	0	0	0	0	0	0	0	0	0	0	0
NC_022541	35410	GCCCGGGTCC.TTGAGGATTT	T	C	40	PASS	NA	GT	0	0	0	0	0	0	0	0	0	0	0	0	0	0	0	0	0	0	0	0	0	0	0	0	0	0	0	0	0	0	0	0	0	0	0	0	0	0	0	0	0
NC_022541	35430	CCAGCGCCTT.TGCGTTGGAG	T	C	40	PASS	NA	GT	0	0	0	0	0	0	0	0	0	0	0	1	1	0	0	0	0	0	0	0	0	0	0	0	0	0	0	0	0	0	0	0	0	0	0	0	0	0	0	0	0
NC_022541	36455	AGGCCGCCGA.TCAACCACTT	T	C	40	PASS	NA	GT	0	0	1	1	1	1	1	0	0	0	1	0	0	1	0	0	1	0	0	1	1	1	0	0	1	1	1	0	0	0	0	0	0	1	1	1	1	0	0	0	0
NC_022541	36470	CACTTGCCCC.ATTCGTGTTC	A	G	40	PASS	NA	GT	0	1	1	1	1	1	1	0	0	0	1	0	0	1	0	0	1	0	0	1	1	1	0	0	1	1	1	0	0	0	0	0	0	1	1	1	1	0	0	0	0
NC_022541	36482	TCGTGTTCGA.ACGCCGTGCG	A	G	40	PASS	NA	GT	0	0	1	1	1	1	1	0	0	0	1	0	0	1	0	0	1	0	0	1	1	1	0	0	1	1	1	0	0	0	0	0	0	1	1	1	1	0	0	0	0
NC_022541	36485	TGTTCGAACG.CCGTGCGCCC	C	T	40	PASS	NA	GT	0	0	0	0	0	0	0	0	0	0	0	0	0	0	0	0	0	0	0	0	0	0	0	0	0	0	0	0	0	0	0	0	0	0	0	0	0	0	0	0	0
NC_022541	36488	TCGAACGCCG.TGCGCCCGGC	T	C	40	PASS	NA	GT	0	1	1	1	1	1	1	0	0	0	1	0	0	1	0	0	1	0	0	1	1	1	0	0	1	1	1	0	0	0	0	0	0	1	1	1	1	0	0	0	0
NC_022541	36497	GTGCGCCCGG.CCCCAACGAC	C	T	40	PASS	NA	GT	0	0	0	0	0	0	0	0	0	0	0	0	0	0	0	0	0	0	0	0	0	0	0	0	0	0	0	0	0	0	0	0	0	0	0	0	0	0	0	0	0
NC_022541	36499	GCGCCCGGCC.CCAACGACGT	C	T	40	PASS	NA	GT	0	0	0	0	0	0	0	0	0	0	0	0	0	0	0	0	0	0	0	0	0	0	0	0	0	0	0	0	0	0	0	0	0	0	0	0	0	0	0	0	0
NC_022541	36500	CGCCCGGCCC.CAACGACGTG	C	T	40	PASS	NA	GT	0	0	0	0	0	0	0	0	0	0	0	0	0	0	0	0	0	0	0	0	0	0	0	0	0	0	0	0	0	0	0	0	0	0	0	0	0	0	0	0	0
NC_022541	36501	GCCCGGCCCC.AACGACGTGC	A	G,C	40	PASS	NA	GT	0	0	0	0	0	0	0	0	0	0	0	0	0	0	0	0	0	0	0	0	0	0	0	0	0	0	0	0	0	0	0	0	0	0	0	0	0	0	0	0	0
NC_022541	36506	GCCCCAACGA.CGTGCAGATC	C	T	40	PASS	NA	GT	0	0	0	0	0	0	0	0	0	0	0	0	0	0	0	0	0	0	0	0	0	0	0	0	0	0	0	0	0	0	0	0	0	0	0	0	0	0	0	0	0
NC_022541	36513	CGACGTGCAG.ATCGACATCG	A	C	40	PASS	NA	GT	0	0	0	0	0	0	0	0	0	0	0	0	0	0	0	0	0	0	0	0	0	0	0	0	0	0	0	0	0	0	0	0	0	0	0	0	0	0	0	0	0
NC_022541	36518	TGCAGATCGA.CATCGCCTAC	C	G	40	PASS	NA	GT	0	0	0	0	0	0	0	0	0	0	0	0	0	0	0	0	0	0	0	0	0	0	0	0	0	0	0	0	0	0	0	0	0	0	0	0	0	0	0	0	0
NC_022541	36530	TCGCCTACTG.CGGCGTGTGT	C	T	40	PASS	NA	GT	0	0	0	0	0	0	0	1	1	0	0	1	1	0	1	0	0	1	1	0	0	0	1	0	0	0	0	1	1	1	1	1	1	0	0	0	0	1	1	1	1
NC_022541	36536	ACTGCGGCGT.GTGTCACTCG	G	C	40	PASS	NA	GT	0	0	0	0	0	0	0	0	0	0	0	0	0	0	0	0	0	0	0	0	0	0	0	0	0	0	0	0	0	0	0	0	0	0	0	0	0	0	0	0	0
NC_022541	36545	TGTGTCACTC.GGACCTGCAT	G	C	40	PASS	NA	GT	0	0	0	0	0	0	0	0	0	0	0	0	0	0	0	0	0	0	0	0	0	0	0	0	0	0	0	0	0	0	0	0	0	0	0	0	0	0	0	0	0
NC_022541	36554	CGGACCTGCA.TACCGCACGC	T	C	40	PASS	NA	GT	0	0	0	0	0	0	0	0	0	0	0	0	0	0	0	0	0	0	0	0	0	0	0	0	0	0	0	0	0	0	0	0	0	0	0	0	0	0	0	0	0
NC_022541	36560	TGCATACCGC.ACGCAACGAA	A	G	40	PASS	NA	GT	0	0	0	0	0	0	0	0	0	0	0	0	0	0	0	0	0	0	0	0	0	0	0	0	0	0	0	0	0	0	0	0	0	0	0	0	0	0	0	0	0
NC_022541	36582	GCACAACACG.CTGTACCCCT	C	T	40	PASS	NA	GT	0	0	1	1	1	1	1	0	0	0	1	0	0	0	0	0	1	0	0	1	1	1	0	0	1	1	0	0	0	0	0	0	0	1	1	0	1	0	0	0	0
NC_022541	36583	CACAACACGC.TGTACCCCTC	T	G	40	PASS	NA	GT	0	0	0	0	0	0	0	0	0	0	0	0	0	0	0	0	0	0	0	0	0	0	0	0	0	0	0	0	0	0	0	0	0	0	0	0	0	0	0	0	0
NC_022541	36584	ACAACACGCT.GTACCCCTCG	G	T,C	40	PASS	NA	GT	0	1	0	0	0	0	0	0	0	0	0	0	0	0	0	0	0	0	0	0	0	0	0	0	0	0	0	0	0	0	0	0	0	0	0	0	0	0	0	0	0
NC_022541	36590	CGCTGTACCC.CTCGGTGCCC	C	T	40	PASS	NA	GT	0	0	0	0	0	0	0	0	0	0	0	0	0	0	0	0	0	0	0	0	0	0	0	0	0	0	0	0	0	0	0	0	0	0	0	0	0	0	0	0	0
NC_022541	36599	CCTCGGTGCC.CGGCCACGAA	C	G,T	40	PASS	NA	GT	0	0	0	0	0	0	0	0	0	0	0	0	0	0	0	0	0	0	0	0	0	0	0	0	0	0	0	0	0	0	0	0	0	0	0	0	0	0	0	0	0
NC_022541	36602	CGGTGCCCGG.CCACGAAATC	C	A	40	PASS	NA	GT	0	0	0	0	0	0	0	0	0	0	0	0	0	0	0	0	0	0	0	0	0	0	0	0	0	0	0	0	0	0	0	0	0	0	0	0	0	0	0	0	0
NC_022541	36608	CCGGCCACGA.AATCGTCGGC	A	G	40	PASS	NA	GT	0	1	1	1	1	1	1	1	1	0	1	1	1	1	1	0	1	1	1	1	1	1	1	0	1	1	1	1	1	1	1	1	0	1	1	1	1	1	1	1	1
NC_022541	36623	TCGGCCGCGT.CACGGCGGTG	C	G,T	40	PASS	NA	GT	0	1	0	0	0	0	0	0	0	0	0	0	0	0	0	0	0	0	0	0	0	0	0	0	0	0	0	0	0	0	0	0	0	0	0	0	0	0	0	0	0
NC_022541	36626	GCCGCGTCAC.GGCGGTGGGC	G	C,A	40	PASS	NA	GT	0	1	0	0	0	0	0	0	0	0	0	0	0	0	0	0	0	0	0	0	0	0	0	0	0	0	0	0	0	0	0	0	0	0	0	0	0	0	0	0	0
NC_022541	36629	GCGTCACGGC.GGTGGGCAAT	G	C	40	PASS	NA	GT	0	1	0	0	0	0	0	0	0	0	0	0	0	0	0	0	0	0	0	0	0	0	0	0	0	0	0	0	0	0	0	0	0	0	0	0	0	0	0	0	0
NC_022541	36632	TCACGGCGGT.GGGCAATGCG	G	C	40	PASS	NA	GT	0	1	0	0	0	0	0	0	0	0	0	0	0	0	0	0	0	0	0	0	0	0	0	0	0	0	0	0	0	0	0	0	0	0	0	0	0	0	0	0	0
NC_022541	36635	CGGCGGTGGG.CAATGCGGTC	C	T	40	PASS	NA	GT	0	0	0	0	0	0	0	0	0	0	0	0	0	0	0	0	0	0	0	0	0	0	0	0	0	0	0	0	0	0	0	0	0	0	0	0	0	0	0	0	0
NC_022541	36636	GGCGGTGGGC.AATGCGGTCA	A	G	40	PASS	NA	GT	0	0	0	0	0	0	0	0	0	0	0	0	0	0	0	0	0	0	0	0	0	0	0	0	0	0	0	0	0	0	0	0	0	0	0	0	0	0	0	0	0
NC_022541	36650	CGGTCACCGG.CTTCAAGGTC	C	T	40	PASS	NA	GT	0	1	0	0	0	0	0	0	0	0	0	0	0	0	0	0	0	0	0	0	0	0	0	0	0	0	0	0	0	0	0	0	0	0	0	0	0	0	0	0	0
NC_022541	36659	GCTTCAAGGT.CGGCGACCTG	C	T	40	PASS	NA	GT	0	0	1	1	1	1	1	0	0	0	1	0	0	1	0	0	1	0	0	1	1	1	0	0	1	1	1	0	0	0	0	0	0	1	1	1	1	0	0	0	0
NC_022541	36668	TCGGCGACCT.GGCCGGTGTT	G	T	40	PASS	NA	GT	0	0	1	1	1	1	1	0	0	0	1	0	0	1	0	0	1	0	0	1	1	1	0	0	1	1	1	0	0	0	0	0	0	1	1	1	1	0	0	0	0
NC_022541	36677	TGGCCGGTGT.TGGCTGCATG	T	C	40	PASS	NA	GT	0	1	0	0	0	0	0	0	0	0	0	0	0	0	0	0	0	0	0	0	0	0	0	0	0	0	0	0	0	0	0	0	0	0	0	0	0	0	0	0	0
NC_022541	36680	CCGGTGTTGG.CTGCATGGTC	C	T	40	PASS	NA	GT	0	1	0	0	0	0	0	0	0	0	0	0	0	0	0	0	0	0	0	0	0	0	0	0	0	0	0	0	0	0	0	0	0	0	0	0	0	0	0	0	0
NC_022541	36687	TGGCTGCATG.GTCGATAGCT	G	A	40	PASS	NA	GT	0	0	0	0	0	0	0	0	0	0	0	0	0	0	0	0	0	0	0	0	0	0	0	0	0	0	0	0	0	0	0	0	0	0	0	0	0	0	0	0	0
NC_022541	36692	GCATGGTCGA.TAGCTGCCGC	T	C	40	PASS	NA	GT	0	1	1	1	1	1	1	1	1	0	1	1	1	1	1	0	1	1	1	1	1	1	1	0	1	1	1	1	1	1	1	1	1	1	1	1	1	1	1	1	1
NC_022541	36728	AGGAAGGCGA.AGAACAGTAT	A	G	40	PASS	NA	GT	0	0	0	0	0	0	0	0	0	0	0	0	0	0	0	0	0	0	0	0	0	0	0	0	0	0	0	0	0	0	0	0	0	0	0	0	0	0	0	0	0
NC_022541	36731	AAGGCGAAGA.ACAGTATTGC	A	G	40	PASS	NA	GT	0	0	0	0	0	0	0	0	0	0	0	0	0	0	0	0	0	0	0	0	0	0	0	0	0	0	0	0	0	0	0	0	0	0	0	0	0	0	0	0	0
NC_022541	36737	AAGAACAGTA.TTGCGAAGCC	T	C	40	PASS	NA	GT	0	0	0	0	0	0	0	0	0	0	0	0	0	0	0	0	0	0	0	0	0	0	0	0	0	0	0	0	0	0	0	0	0	0	0	0	0	0	0	0	0
NC_022541	36743	AGTATTGCGA.AGCCGGCTTC	A	G	40	PASS	NA	GT	0	1	0	0	0	0	0	0	0	0	0	0	0	0	0	0	0	0	0	0	0	0	0	0	0	0	0	0	0	0	0	0	0	0	0	0	0	0	0	0	0
NC_022541	36744	GTATTGCGAA.GCCGGCTTCA	G	C	40	PASS	NA	GT	0	1	1	1	1	1	1	0	0	0	1	0	0	1	0	0	1	0	0	1	1	1	0	0	1	1	1	0	0	0	0	0	0	1	1	1	1	0	0	0	0
NC_022541	36745	TATTGCGAAG.CCGGCTTCAC	C	A	40	PASS	NA	GT	0	1	1	1	1	1	1	0	0	0	1	0	0	1	0	0	1	0	0	1	1	1	0	0	1	1	1	0	0	0	0	0	0	1	1	1	1	0	0	0	0
NC_022541	36746	ATTGCGAAGC.CGGCTTCACC	C	G	40	PASS	NA	GT	0	1	1	1	1	1	1	0	0	0	1	0	0	1	0	0	1	0	0	1	1	1	0	0	1	1	1	0	0	0	0	0	0	1	1	1	1	0	0	0	0
NC_022541	36749	GCGAAGCCGG.CTTCACCGGT	C	A,T,G	40	PASS	NA	GT	0	1	0	0	0	0	0	0	0	0	0	0	0	2	0	0	0	0	0	0	0	0	0	0	0	0	2	0	0	0	0	0	0	0	0	2	0	0	0	0	0
NC_022541	36758	GCTTCACCGG.TACCTACAAC	T	C	40	PASS	NA	GT	0	1	1	1	1	1	1	1	1	0	1	1	1	1	1	0	1	1	1	1	1	1	1	0	1	1	1	1	1	1	1	1	1	1	1	1	1	1	1	1	1
NC_022541	36761	TCACCGGTAC.CTACAACGGG	C	G	40	PASS	NA	GT	0	0	1	1	1	1	1	0	0	0	1	0	0	1	0	0	1	0	0	1	1	1	0	0	1	1	1	0	0	0	0	0	0	1	1	1	1	0	0	0	0
NC_022541	36764	CCGGTACCTA.CAACGGGCCG	C	T	40	PASS	NA	GT	0	1	0	0	0	0	0	0	0	0	0	0	0	0	0	0	0	0	0	0	0	0	0	0	0	0	0	0	0	0	0	0	0	0	0	0	0	0	0	0	0
NC_022541	36770	CCTACAACGG.GCCGATGTTC	G	C	40	PASS	NA	GT	0	1	0	0	0	0	0	0	0	0	0	0	0	0	0	0	0	0	0	0	0	0	0	0	0	0	0	0	0	0	0	0	0	0	0	0	0	0	0	0	0
NC_022541	36782	CGATGTTCGG.CGGCGGCGAG	C	T	40	PASS	NA	GT	0	1	0	0	0	0	0	0	0	0	0	0	0	0	0	0	0	0	0	0	0	0	0	0	0	0	0	0	0	0	0	0	0	0	0	0	0	0	0	0	0
NC_022541	36809	ACGGCGGCTA.TTCGGACCAT	T	C	40	PASS	NA	GT	0	0	1	1	1	1	1	0	0	0	1	0	0	1	0	0	1	0	0	1	1	1	0	0	1	1	1	0	0	0	0	0	0	1	1	1	1	0	0	0	0
NC_022541	36812	GCGGCTATTC.GGACCATATC	G	C	40	PASS	NA	GT	0	1	1	1	1	1	1	1	1	0	1	1	1	1	1	0	1	1	1	1	1	1	1	0	1	1	1	1	1	1	1	1	1	1	1	1	1	1	1	1	1
NC_022541	36818	ATTCGGACCA.TATCGTGGTC	T	A	40	PASS	NA	GT	0	0	0	0	0	0	0	0	0	0	0	0	0	0	0	0	0	0	0	0	0	0	0	0	0	0	0	0	0	0	0	0	0	0	0	0	0	0	0	0	0
NC_022541	36821	CGGACCATAT.CGTGGTCGAC	C	T	40	PASS	NA	GT	0	0	1	1	1	1	1	0	0	0	1	0	0	0	0	0	1	0	0	1	1	1	0	0	1	1	0	0	0	0	0	0	0	1	1	0	1	0	0	0	0
NC_022541	36833	TGGTCGACCA.GAAGTACGTG	G	A	40	PASS	NA	GT	0	0	0	0	0	0	0	0	0	0	0	0	0	0	0	0	0	0	0	0	0	0	0	0	0	0	0	0	0	0	0	0	0	0	0	0	0	0	0	0	0
NC_022541	36835	GTCGACCAGA.AGTACGTGCT	A	G	40	PASS	NA	GT	0	0	0	0	0	0	0	0	0	0	0	0	0	0	0	0	0	0	0	0	0	0	0	0	0	0	0	0	0	0	0	0	0	0	0	0	0	0	0	0	0
NC_022541	36836	TCGACCAGAA.GTACGTGCTG	G	A	40	PASS	NA	GT	0	1	0	0	0	0	0	0	0	0	0	0	0	0	0	0	0	0	0	0	0	0	0	0	0	0	0	0	0	0	0	0	0	0	0	0	0	0	0	0	0
NC_022541	36852	GCTGCGCATC.ACCCACAGCG	A	T	40	PASS	NA	GT	0	0	0	0	0	0	0	0	0	0	0	0	0	0	0	0	0	0	0	0	0	0	0	0	0	0	0	0	0	0	0	0	0	0	0	0	0	0	0	0	0
NC_022541	36857	GCATCACCCA.CAGCGACAAC	C	T	40	PASS	NA	GT	0	0	0	0	0	0	0	0	0	0	0	0	0	0	0	0	0	0	0	0	0	0	0	0	0	0	0	0	0	0	0	0	0	0	0	0	0	0	0	0	0
NC_022541	36858	CATCACCCAC.AGCGACAACC	A	T	40	PASS	NA	GT	0	0	0	0	0	0	0	0	0	0	0	0	0	0	0	0	0	0	0	0	0	0	0	0	0	0	0	0	0	0	0	0	0	0	0	0	0	0	0	0	0
NC_022541	36859	ATCACCCACA.GCGACAACCT	G	C	40	PASS	NA	GT	0	0	0	0	0	0	0	0	0	0	0	0	0	0	0	0	0	0	0	0	0	0	0	0	0	0	0	0	0	0	0	0	0	0	0	0	0	0	0	0	0
NC_022541	36867	CAGCGACAAC.CTGGCCGCGG	C	T	40	PASS	NA	GT	0	0	0	0	0	0	0	0	0	0	0	1	1	0	0	0	0	0	0	0	0	0	0	0	0	0	0	0	0	0	0	0	0	0	0	0	0	0	0	0	0
NC_022541	36881	CCGCGGTGGC.ACCGCTGCTG	A	G	40	PASS	NA	GT	0	0	0	0	0	0	0	0	0	0	0	0	0	0	0	0	0	0	0	0	0	0	0	0	0	0	0	0	0	0	0	0	0	0	0	0	0	0	0	0	0
NC_022541	36885	GGTGGCACCG.CTGCTGTGCG	C	T	40	PASS	NA	GT	0	1	0	0	0	0	0	0	0	0	0	0	0	0	0	0	0	0	0	0	0	0	0	0	0	0	0	0	0	0	0	0	0	0	0	0	0	0	0	0	0
NC_022541	36887	TGGCACCGCT.GCTGTGCGCC	G	A	40	PASS	NA	GT	0	0	0	0	0	0	0	0	0	0	0	0	0	0	0	0	0	0	0	0	0	0	0	0	0	0	0	0	0	0	0	0	0	0	0	0	0	0	0	0	0
NC_022541	36914	CCACCTATTC.CCCGCTGGCG	C	G	40	PASS	NA	GT	0	1	1	1	1	1	1	1	1	0	1	1	1	1	1	0	1	1	1	1	1	1	1	0	1	1	1	1	1	1	1	1	1	1	1	1	1	1	1	1	1
NC_022541	36918	CTATTCCCCG.CTGGCGCACT	C	T	40	PASS	NA	GT	0	0	1	1	1	1	1	0	0	0	1	0	0	1	0	0	1	0	0	1	1	1	0	0	1	1	1	0	0	0	0	0	0	1	1	1	1	0	0	0	0
NC_022541	36923	CCCCGCTGGC.GCACTGGAAG	G	A	40	PASS	NA	GT	0	1	1	1	1	1	1	0	0	0	1	0	0	1	0	0	1	0	0	1	1	1	0	0	1	1	1	0	0	0	0	0	0	1	1	1	1	0	0	0	0
NC_022541	36926	CGCTGGCGCA.CTGGAAGGTG	C	T	40	PASS	NA	GT	0	0	0	0	0	0	0	0	0	0	0	0	0	0	0	0	0	0	0	0	0	0	0	0	0	0	0	0	0	0	0	0	0	0	0	0	0	0	0	0	0
NC_022541	36935	ACTGGAAGGT.GGGTCCGGGC	G	A	40	PASS	NA	GT	0	0	0	0	0	0	0	1	1	0	0	1	1	0	1	0	0	1	1	0	0	0	1	0	0	0	0	1	1	1	1	1	1	0	0	0	0	1	1	1	1
NC_022541	36938	GGAAGGTGGG.TCCGGGCCAG	T	C	40	PASS	NA	GT	0	0	0	0	0	0	0	1	1	0	0	1	1	0	1	0	0	1	1	0	0	0	1	0	0	0	0	1	1	1	1	1	1	0	0	0	0	1	1	1	1
NC_022541	36949	CCGGGCCAGA.AGGTAGGCGT	A	G	40	PASS	NA	GT	0	0	0	0	0	0	0	0	0	0	0	0	0	0	0	0	0	0	0	0	0	0	0	0	0	0	0	0	0	0	0	0	0	0	0	0	0	0	0	0	0
NC_022541	36953	GCCAGAAGGT.AGGCGTGGTC	A	G	40	PASS	NA	GT	0	1	1	1	1	1	1	1	1	0	1	1	1	1	1	0	1	1	1	1	1	1	1	0	1	1	1	1	1	1	1	1	1	1	1	1	1	1	1	1	1
NC_022541	36960	GGTAGGCGTG.GTCGGTCTGG	G	A	40	PASS	NA	GT	0	0	0	0	0	0	0	0	0	0	0	0	0	0	0	0	0	0	0	0	0	0	0	0	0	0	0	0	0	0	0	0	0	0	0	0	0	0	0	0	0
NC_022541	36965	GCGTGGTCGG.TCTGGGTGGC	T	C	40	PASS	NA	GT	0	1	0	0	0	0	0	0	0	0	0	0	0	0	0	0	0	0	0	0	0	0	0	0	0	0	0	0	0	0	0	0	0	0	0	0	0	0	0	0	0
NC_022541	36968	TGGTCGGTCT.GGGTGGCCTG	G	C	40	PASS	NA	GT	0	0	1	1	1	1	1	1	1	0	1	1	1	1	1	0	1	1	1	1	1	1	1	0	1	1	1	1	1	1	1	1	1	1	1	1	1	1	1	1	1
NC_022541	36971	TCGGTCTGGG.TGGCCTGGGC	T	C	40	PASS	NA	GT	0	1	1	1	1	1	1	1	1	0	1	1	1	1	1	0	1	1	1	1	1	1	1	0	1	1	1	1	1	1	1	1	1	1	1	1	1	1	1	1	1
NC_022541	36983	GCCTGGGCCA.CATGGCGGTG	C	T	40	PASS	NA	GT	0	0	0	0	0	0	0	1	1	0	0	1	1	0	1	0	0	1	1	0	0	0	1	0	0	0	0	1	1	1	1	1	1	0	0	0	0	1	1	1	1
NC_022541	37373	ACATCGAAAC.CATCCGCGCC	C	G	40	LCB	NA	GT	0	0	0	0	0	0	0	0	0	0	0	1	1	0	0	0	0	1	0	0	0	0	0	0	0	0	0	0	0	0	0	0	1	0	0	0	0	0	0	0	0
NC_022541	37384	ATCCGCGCCG.ACCAGATCAA	A	G	40	LCB	NA	GT	0	0	1	0	1	1	1	0	0	0	0	0	0	0	0	0	0	0	0	0	0	1	0	0	0	0	0	0	0	0	0	0	0	1	0	0	0	0	0	0	0
NC_022541	37396	CAGATCAACG.CCGCCTACGA	C	A	40	LCB	NA	GT	0	1	1	1	1	1	1	1	1	0	1	1	1	1	1	0	1	1	1	1	1	1	1	0	1	1	1	1	1	1	1	1	1	1	1	1	1	1	1	1	1
NC_022541	37397	AGATCAACGC.CGCCTACGAG	C	G	40	LCB	NA	GT	0	1	1	1	1	1	1	1	1	0	1	1	1	1	1	0	1	1	1	1	1	1	1	0	1	1	1	1	1	1	1	1	1	1	1	1	1	1	1	1	1
NC_022541	40334	CGTGGTTGCC.GTGCGCGCGT	G	A	40	PASS	NA	GT	0	0	0	0	0	0	0	0	0	0	0	0	0	0	0	0	0	0	0	0	0	0	0	0	0	0	0	0	0	0	0	0	0	0	0	0	0	0	0	0	0
NC_022541	40337	GGTTGCCGTG.CGCGCGTGCG	C	T	40	PASS	NA	GT	0	0	0	0	0	0	0	0	0	0	0	0	0	0	0	0	0	1	0	0	0	0	0	0	0	0	0	0	0	0	0	0	0	0	0	0	0	0	0	0	0
NC_022541	40338	GTTGCCGTGC.GCGCGTGCGA	G	A	40	PASS	NA	GT	0	0	0	0	0	0	0	0	0	0	0	0	0	0	0	0	0	1	0	0	0	0	0	0	0	0	0	0	0	0	0	0	0	0	0	0	0	0	0	0	0
NC_022541	40339	TTGCCGTGCG.CGCGTGCGAT	C	T	40	PASS	NA	GT	0	0	1	1	1	1	1	0	0	0	1	0	0	1	0	0	1	0	0	1	1	1	0	0	1	1	1	0	0	0	0	0	0	1	1	1	1	0	0	0	0
NC_022541	40340	TGCCGTGCGC.GCGTGCGATG	G	C	40	PASS	NA	GT	0	0	0	0	0	0	0	1	1	0	0	0	0	0	1	0	0	0	1	0	0	0	1	0	0	0	0	1	1	1	1	1	0	0	0	0	0	1	1	1	1
NC_022541	40343	CGTGCGCGCG.TGCGATGGCG	T	C	40	PASS	NA	GT	0	1	1	1	1	1	1	1	1	0	1	1	1	1	1	0	1	1	1	1	1	1	1	0	1	1	1	1	1	1	1	1	1	1	1	1	1	1	1	1	1
NC_022541	40346	GCGCGCGTGC.GATGGCGCCG	G	A	40	PASS	NA	GT	0	0	0	0	0	0	0	1	1	0	0	1	1	0	1	0	0	0	1	0	0	0	1	0	0	0	0	1	1	1	1	1	1	0	0	0	0	1	1	1	1
NC_022541	40349	CGCGTGCGAT.GGCGCCGGAC	G	C	40	PASS	NA	GT	0	0	0	0	0	0	0	1	1	0	0	1	1	0	1	0	0	0	1	0	0	0	1	0	0	0	0	1	1	1	1	1	1	0	0	0	0	1	1	1	1
NC_022541	40352	GTGCGATGGC.GCCGGACAGG	G	A	40	PASS	NA	GT	0	0	1	1	1	1	1	0	0	0	1	0	0	1	0	0	1	0	0	1	1	1	0	0	1	1	1	0	0	0	0	0	0	1	1	1	1	0	0	0	0
NC_022541	40358	TGGCGCCGGA.CAGGCGCGCG	C	A	40	PASS	NA	GT	0	0	0	0	0	0	0	0	0	0	0	0	0	0	0	0	0	1	0	0	0	0	0	0	0	0	0	0	0	0	0	0	0	0	0	0	0	0	0	0	0
NC_022541	40361	CGCCGGACAG.GCGCGCGCCG	G	C	40	PASS	NA	GT	0	0	1	1	1	1	1	0	0	0	1	0	0	1	0	0	1	0	0	1	1	1	0	0	1	1	1	0	0	0	0	0	0	1	1	1	1	0	0	0	0
NC_022541	40364	CGGACAGGCG.CGCGCCGATC	C	T	40	PASS	NA	GT	0	1	0	0	0	0	0	0	0	0	0	0	0	0	0	0	0	0	0	0	0	0	0	0	0	0	0	0	0	0	0	0	0	0	0	0	0	0	0	0	0
NC_022541	40403	TCAGGAAGCG.ATGGTCGCCG	A	G	40	PASS	NA	GT	0	0	0	0	0	0	0	0	0	0	0	0	0	0	0	0	0	1	0	0	0	0	0	0	0	0	0	0	0	0	0	0	0	0	0	0	0	0	0	0	0
NC_022541	40406	GGAAGCGATG.GTCGCCGCCG	G	T	40	PASS	NA	GT	0	0	0	0	0	0	0	0	0	0	0	0	0	0	0	0	0	0	0	0	0	0	0	0	0	0	0	0	0	0	0	0	0	0	0	0	0	0	0	0	0
NC_022541	40412	GATGGTCGCC.GCCGCGCTTG	G	A	40	PASS	NA	GT	0	1	0	0	0	0	0	0	0	0	0	0	0	0	0	0	0	0	0	0	0	0	0	0	0	0	0	0	0	0	0	0	0	0	0	0	0	0	0	0	0
NC_022541	40415	GGTCGCCGCC.GCGCTTGTTG	G	A	40	PASS	NA	GT	0	0	0	0	0	0	0	1	1	0	0	0	0	0	1	0	0	0	1	0	0	0	1	0	0	0	0	1	1	1	1	1	0	0	0	0	0	1	1	1	1
NC_022541	40416	GTCGCCGCCG.CGCTTGTTGG	C	G	40	PASS	NA	GT	0	0	1	1	1	1	1	0	0	0	1	0	0	1	0	0	1	0	0	1	1	1	0	0	1	1	1	0	0	0	0	0	0	1	1	1	1	0	0	0	0
NC_022541	40417	TCGCCGCCGC.GCTTGTTGGC	G	T	40	PASS	NA	GT	0	0	1	1	1	1	1	1	1	0	1	1	1	1	1	0	1	0	1	1	1	1	1	0	1	1	1	1	1	1	1	1	1	1	1	1	1	1	1	1	1
NC_022541	40423	CCGCGCTTGT.TGGCGATCGC	T	G	40	PASS	NA	GT	0	0	1	1	1	1	1	0	0	0	1	0	0	1	0	0	1	0	0	1	1	1	0	0	1	1	1	0	0	0	0	0	0	1	1	1	1	0	0	0	0
NC_022541	40424	CGCGCTTGTT.GGCGATCGCA	G	C	40	PASS	NA	GT	0	0	0	0	0	0	0	0	0	0	0	0	0	0	0	0	0	0	0	0	0	0	0	0	0	0	0	0	0	0	0	0	0	0	0	0	0	0	0	0	0
NC_022541	40430	TGTTGGCGAT.CGCATCGGCG	C	T,G	40	PASS	NA	GT	0	1	2	2	2	2	2	0	0	0	2	0	0	2	0	0	2	0	0	2	2	2	0	0	2	2	2	0	0	0	0	0	0	2	2	2	2	0	0	0	0
NC_022541	40439	TCGCATCGGC.GAGCAGGCCG	G	C	40	PASS	NA	GT	0	0	0	0	0	0	0	1	1	0	0	1	1	0	1	0	0	1	1	0	0	0	1	0	0	0	0	1	1	1	1	1	1	0	0	0	0	1	1	1	1
NC_022541	40444	TCGGCGAGCA.GGCCGTCCAT	G	A	40	PASS	NA	GT	0	0	0	0	0	0	0	1	1	0	0	1	1	0	1	0	0	1	1	0	0	0	1	0	0	0	0	1	1	1	1	1	1	0	0	0	0	1	1	1	1
NC_022541	40448	CGAGCAGGCC.GTCCATCTGC	G	A	40	PASS	NA	GT	0	1	0	0	0	0	0	0	0	0	0	0	0	0	0	0	0	0	0	0	0	0	0	0	0	0	0	0	0	0	0	0	0	0	0	0	0	0	0	0	0
NC_022541	40457	CGTCCATCTG.CGTGGCCAGG	C	G	40	PASS	NA	GT	0	0	0	0	0	0	0	0	0	0	0	0	0	1	0	0	0	0	0	0	0	0	0	0	0	0	1	0	0	0	0	0	0	0	0	1	0	0	0	0	0
NC_022541	40460	CCATCTGCGT.GGCCAGGCTG	G	A,C	40	PASS	NA	GT	0	0	0	0	0	0	0	1	1	0	0	1	1	2	1	0	0	1	1	0	0	0	1	0	0	0	2	1	1	1	1	1	1	0	0	2	0	1	1	1	1
NC_022541	40472	CCAGGCTGTC.GGGCGATTCG	G	C,T	40	PASS	NA	GT	0	1	0	0	0	0	0	2	2	0	0	2	2	0	2	0	0	2	2	0	0	0	2	0	0	0	0	2	2	2	2	2	2	0	0	0	0	2	2	2	2
NC_022541	40481	CGGGCGATTC.GTACAGGCGC	G	A	40	PASS	NA	GT	0	0	0	0	0	0	0	0	0	0	0	0	0	0	0	0	0	0	0	0	0	0	0	0	0	0	0	0	0	0	0	0	0	0	0	0	0	0	0	0	0
NC_022541	40490	CGTACAGGCG.CTGGGCCGCG	C	T	40	PASS	NA	GT	0	0	0	0	0	0	0	0	0	0	0	0	0	0	0	0	0	0	0	0	0	0	0	0	0	0	0	0	0	0	0	0	0	0	0	0	0	0	0	0	0
NC_022541	40496	GGCGCTGGGC.CGCGCAGTGA	C	G	40	PASS	NA	GT	0	1	0	0	0	0	0	1	1	0	0	1	1	0	1	0	0	1	1	0	0	0	1	0	0	0	0	1	1	1	1	1	1	0	0	0	0	1	1	1	1
NC_022541	40501	TGGGCCGCGC.AGTGACTGCC	A	G	40	PASS	NA	GT	0	0	1	1	1	1	1	0	0	0	1	0	0	0	0	0	1	0	0	1	1	1	0	0	1	1	0	0	0	0	0	0	0	1	1	0	1	0	0	0	0
NC_022541	40502	GGGCCGCGCA.GTGACTGCCG	G	A	40	PASS	NA	GT	0	0	1	1	1	1	1	0	0	0	1	0	0	1	0	0	1	0	0	1	1	1	0	0	1	1	1	0	0	0	0	0	0	1	1	1	1	0	0	0	0
NC_022541	40505	CCGCGCAGTG.ACTGCCGTCG	A	G	40	PASS	NA	GT	0	1	1	1	1	1	1	1	1	0	1	1	1	1	1	0	1	1	1	1	1	1	1	0	1	1	1	1	1	1	1	1	1	1	1	1	1	1	1	1	1
NC_022541	40508	CGCAGTGACT.GCCGTCGTAC	G	A	40	PASS	NA	GT	0	0	1	1	1	1	1	0	0	0	1	0	0	1	0	0	1	0	0	1	1	1	0	0	1	1	1	0	0	0	0	0	0	1	1	1	1	0	0	0	0
NC_022541	40517	TGCCGTCGTA.CTGCGCATGC	C	G	40	PASS	NA	GT	0	1	1	1	1	1	1	0	0	0	1	0	0	1	0	0	1	0	0	1	1	1	0	0	1	1	1	0	0	0	0	0	0	1	1	1	1	0	0	0	0
NC_022541	40518	GCCGTCGTAC.TGCGCATGCG	T	C	40	PASS	NA	GT	0	1	1	1	1	1	1	0	0	0	1	0	0	1	0	0	1	0	0	1	1	1	0	0	1	1	1	0	0	0	0	0	0	1	1	1	1	0	0	0	0
NC_022541	40520	CGTCGTACTG.CGCATGCGTG	C	G,T	40	PASS	NA	GT	0	1	0	0	0	0	0	0	0	0	0	0	0	0	0	0	0	0	0	0	0	0	0	0	0	0	0	0	0	0	0	0	0	0	0	0	0	0	0	0	0
NC_022541	40523	CGTACTGCGC.ATGCGTGAGC	A	G	40	PASS	NA	GT	0	0	0	0	0	0	0	0	0	0	0	0	0	0	0	0	0	0	0	0	0	0	0	0	0	0	0	0	0	0	0	0	0	0	0	0	0	0	0	0	0
NC_022541	40526	ACTGCGCATG.CGTGAGCAGG	C	G	40	PASS	NA	GT	0	0	1	1	1	1	1	1	1	0	1	1	1	1	1	0	1	1	1	1	1	1	1	0	1	1	1	1	1	1	1	1	1	1	1	1	1	1	1	1	1
NC_022541	40529	GCGCATGCGT.GAGCAGGCGC	G	C	40	PASS	NA	GT	0	0	0	0	0	0	0	0	0	0	0	0	0	0	0	0	0	0	0	0	0	0	0	0	0	0	0	0	0	0	0	0	0	0	0	0	0	0	0	0	0
NC_022541	40541	GCAGGCGCGA.GAGGTCGACC	G	C	40	PASS	NA	GT	0	0	1	1	1	1	1	0	0	0	1	0	0	1	0	0	1	0	0	1	1	1	0	0	1	1	1	0	0	0	0	0	0	1	1	1	1	0	0	0	0
NC_022541	40546	CGCGAGAGGT.CGACCTTGAC	C	T	40	PASS	NA	GT	0	0	0	0	0	0	0	0	0	0	0	0	0	0	0	0	0	0	0	0	0	0	0	0	0	0	0	0	0	0	0	0	0	0	0	0	0	0	0	0	0
NC_022541	40559	CCTTGACGCC.CGGGCGCGGC	C	G	40	PASS	NA	GT	0	1	0	0	0	0	0	0	0	0	0	0	0	0	0	0	0	0	0	0	0	0	0	0	0	0	0	0	0	0	0	0	0	0	0	0	0	0	0	0	0
NC_022541	40562	TGACGCCCGG.GCGCGGCGAG	G	A	40	PASS	NA	GT	0	0	0	0	0	0	0	0	0	0	0	0	0	0	0	0	0	0	0	0	0	0	0	0	0	0	0	0	0	0	0	0	0	0	0	0	0	0	0	0	0
NC_022541	40571	GGCGCGGCGA.GACGTCCAGC	G	A,C	40	PASS	NA	GT	0	1	2	2	2	2	2	0	0	0	2	0	0	2	0	0	2	0	0	2	2	2	0	0	2	2	2	0	0	0	0	0	0	2	2	2	2	0	0	0	0
NC_022541	40573	CGCGGCGAGA.CGTCCAGCTG	C	T	40	PASS	NA	GT	0	0	0	0	0	0	0	1	1	0	0	0	0	0	1	0	0	0	1	0	0	0	1	0	0	0	0	1	1	1	1	1	0	0	0	0	0	1	1	1	1
NC_022541	40574	GCGGCGAGAC.GTCCAGCTGT	G	C	40	PASS	NA	GT	0	1	1	1	1	1	1	0	0	0	1	0	0	1	0	0	1	0	0	1	1	1	0	0	1	1	1	0	0	0	0	0	0	1	1	1	1	0	0	0	0
NC_022541	40584	GTCCAGCTGT.TCCAGCAGGT	T	C	40	PASS	NA	GT	0	0	0	0	0	0	0	0	0	0	0	0	0	0	0	0	0	0	0	0	0	0	0	0	0	0	0	0	0	0	0	0	0	0	0	0	0	0	0	0	0
NC_022541	40585	TCCAGCTGTT.CCAGCAGGTC	C	T	40	PASS	NA	GT	0	0	0	0	0	0	0	0	0	0	0	0	0	0	0	0	0	0	0	0	0	0	0	0	0	0	0	0	0	0	0	0	0	0	0	0	0	0	0	0	0
NC_022541	40586	CCAGCTGTTC.CAGCAGGTCG	C	G	40	PASS	NA	GT	0	0	1	1	1	1	1	0	0	0	1	0	0	1	0	0	1	0	0	1	1	1	0	0	1	1	1	0	0	0	0	0	0	1	1	1	1	0	0	0	0
NC_022541	40622	CGTCCAGCGA.GCGCACACCC	G	A	40	PASS	NA	GT	0	0	0	0	0	0	0	0	0	0	0	0	0	0	0	0	0	0	0	0	0	0	0	0	0	0	0	0	0	0	0	0	0	0	0	0	0	0	0	0	0
NC_022541	40625	CCAGCGAGCG.CACACCCAGA	C	T	40	PASS	NA	GT	0	0	0	0	0	0	0	0	0	0	0	0	0	0	0	0	0	0	0	0	0	0	0	0	0	0	0	0	0	0	0	0	0	0	0	0	0	0	0	0	0
NC_022541	40626	CAGCGAGCGC.ACACCCAGAT	A	G	40	PASS	NA	GT	0	0	0	0	0	0	0	0	0	0	0	0	0	0	0	0	0	0	0	0	0	0	0	0	0	0	0	0	0	0	0	0	0	0	0	0	0	0	0	0	0
NC_022541	40628	GCGAGCGCAC.ACCCAGATAC	A	G	40	PASS	NA	GT	0	0	1	1	1	1	1	1	1	0	1	1	1	1	1	0	1	1	1	1	1	1	1	0	1	1	1	1	1	1	1	1	1	1	1	1	1	1	1	1	1
NC_022541	40634	GCACACCCAG.ATACGACAGC	A	G	40	PASS	NA	GT	0	1	1	1	1	1	1	0	0	0	1	0	0	1	0	0	1	0	0	1	1	1	0	0	1	1	1	0	0	0	0	0	0	1	1	1	1	0	0	0	0
NC_022541	40637	CACCCAGATA.CGACAGCCAC	C	A	40	PASS	NA	GT	0	0	0	0	0	0	0	0	0	0	0	0	0	0	0	0	0	0	0	0	0	0	0	0	0	0	0	0	0	0	0	0	0	0	0	0	0	0	0	0	0
NC_022541	40646	ACGACAGCCA.CTGGCGCACT	C	G,T	40	PASS	NA	GT	0	0	0	0	0	0	0	0	0	0	0	0	0	0	0	0	0	0	0	0	0	0	0	0	0	0	0	0	0	0	0	0	0	0	0	0	0	0	0	0	0
NC_022541	40647	CGACAGCCAC.TGGCGCACTT	T	C	40	PASS	NA	GT	0	0	0	0	0	0	0	0	0	0	0	0	0	0	0	0	0	0	0	0	0	0	0	0	0	0	0	0	0	0	0	0	0	0	0	0	0	0	0	0	0
NC_022541	40648	GACAGCCACT.GGCGCACTTC	G	C	40	PASS	NA	GT	0	0	0	0	0	0	0	0	0	0	0	0	0	0	0	0	0	0	0	0	0	0	0	0	0	0	0	0	0	0	0	0	0	0	0	0	0	0	0	0	0
NC_022541	40649	ACAGCCACTG.GCGCACTTCT	G	C	40	PASS	NA	GT	0	0	1	1	1	1	1	0	0	0	1	0	0	1	0	0	1	0	0	1	1	1	0	0	1	1	1	0	0	0	0	0	0	1	1	1	1	0	0	0	0
NC_022541	40652	GCCACTGGCG.CACTTCTTCG	C	T	40	PASS	NA	GT	0	0	0	0	0	0	0	0	0	0	0	0	0	0	0	0	0	1	0	0	0	0	0	0	0	0	0	0	0	0	0	0	0	0	0	0	0	0	0	0	0
NC_022541	40655	ACTGGCGCAC.TTCTTCGGCC	T	C	40	PASS	NA	GT	0	0	0	0	0	0	0	1	1	0	0	1	1	0	1	0	0	1	1	0	0	0	1	0	0	0	0	1	1	1	1	1	1	0	0	0	0	1	1	1	1
NC_022541	40658	GGCGCACTTC.TTCGGCCAGC	T	C	40	PASS	NA	GT	0	0	1	1	1	1	1	0	0	0	1	0	0	1	0	0	1	0	0	1	1	1	0	0	1	1	1	0	0	0	0	0	0	1	1	1	1	0	0	0	0
NC_022541	40676	GCAGGCGGAA.GAAGTGTTCC	G	A	40	PASS	NA	GT	0	1	0	0	0	0	0	0	0	0	0	0	0	0	0	0	0	0	0	0	0	0	0	0	0	0	0	0	0	0	0	0	0	0	0	0	0	0	0	0	0
NC_022541	40681	CGGAAGAAGT.GTTCCACCCG	G	T	40	PASS	NA	GT	0	0	1	1	1	1	1	0	0	0	1	0	0	1	0	0	1	0	0	1	1	1	0	0	1	1	1	0	0	0	0	0	0	1	1	1	1	0	0	0	0
NC_022541	40682	GGAAGAAGTG.TTCCACCCGT	T	C	40	PASS	NA	GT	0	1	1	1	1	1	1	1	1	0	1	1	1	1	1	0	1	1	1	1	1	1	1	0	1	1	1	1	1	1	1	1	1	1	1	1	1	1	1	1	1
NC_022541	40688	AGTGTTCCAC.CCGTTCCGGC	C	G,T	40	PASS	NA	GT	0	0	1	1	1	1	1	0	0	0	1	0	0	1	0	0	1	0	0	1	1	1	0	0	1	1	1	0	0	0	0	0	0	1	1	1	1	0	0	0	0
NC_022541	40691	GTTCCACCCG.TTCCGGCAGG	T	C	40	PASS	NA	GT	0	1	1	1	1	1	1	0	0	0	1	0	0	1	0	0	1	0	0	1	1	1	0	0	1	1	1	0	0	0	0	0	0	1	1	1	1	0	0	0	0
NC_022541	40694	CCACCCGTTC.CGGCAGGCCG	C	G	40	PASS	NA	GT	0	0	1	1	1	1	1	0	0	0	1	0	0	1	0	0	1	0	0	1	1	1	0	0	1	1	1	0	0	0	0	0	0	1	1	1	1	0	0	0	0
NC_022541	40699	CGTTCCGGCA.GGCCGGTGAA	G	A	40	PASS	NA	GT	0	0	0	0	0	0	0	0	0	0	0	0	0	0	0	0	0	1	0	0	0	0	0	0	0	0	0	0	0	0	0	0	0	0	0	0	0	0	0	0	0
NC_022541	40709	GGCCGGTGAA.ATAGCCGGCG	A	G	40	PASS	NA	GT	0	1	1	1	1	1	1	0	0	0	1	0	0	1	0	0	1	0	0	1	1	1	0	0	1	1	1	0	0	0	0	0	0	1	1	1	1	0	0	0	0
NC_022541	40712	CGGTGAAATA.GCCGGCGCGC	G	T	40	PASS	NA	GT	0	0	1	1	1	1	1	0	0	0	1	0	0	1	0	0	1	0	0	1	1	1	0	0	1	1	1	0	0	0	0	0	0	1	1	1	1	0	0	0	0
NC_022541	40715	TGAAATAGCC.GGCGCGCAGG	G	C	40	PASS	NA	GT	0	0	0	0	0	0	0	0	0	0	0	0	0	0	0	0	0	0	0	0	0	0	0	0	0	0	0	0	0	0	0	0	0	0	0	0	0	0	0	0	0
NC_022541	40718	AATAGCCGGC.GCGCAGGCGC	G	A	40	PASS	NA	GT	0	0	1	1	1	1	1	0	0	0	1	0	0	1	0	0	1	0	0	1	1	1	0	0	1	1	1	0	0	0	0	0	0	1	1	1	1	0	0	0	0
NC_022541	40739	CGTCCTGGGT.GGCCACGCCG	G	A	40	PASS	NA	GT	0	0	1	1	1	1	1	0	0	0	1	0	0	1	0	0	1	0	0	1	1	1	0	0	1	1	1	0	0	0	0	0	0	1	1	1	1	0	0	0	0
NC_022541	40745	GGGTGGCCAC.GCCGGTGGCG	G	C,A	40	PASS	NA	GT	0	0	1	0	1	1	1	0	0	0	0	0	0	0	0	0	0	0	0	0	0	1	0	0	0	0	0	0	0	0	0	0	0	1	0	0	0	0	0	0	0
NC_022541	40784	TGCGCAGGTA.TTTGCAGCCC	T	C	40	PASS	NA	GT	0	1	1	1	1	1	1	0	0	0	1	0	0	1	0	0	1	0	0	1	1	1	0	0	1	1	1	0	0	0	0	0	0	1	1	1	1	0	0	0	0
NC_022541	40796	TGCAGCCCAG.CACGATCATC	C	T	40	PASS	NA	GT	0	0	0	0	0	0	0	0	0	0	0	1	1	0	0	0	0	0	0	0	0	0	0	0	0	0	0	0	0	0	0	0	0	0	0	0	0	0	0	0	0
NC_022541	40808	CGATCATCGG.CGCGGTGCCG	C	T	40	PASS	NA	GT	0	0	0	0	0	0	0	0	0	0	0	0	0	0	0	0	0	0	0	0	0	0	0	0	0	0	0	0	0	0	0	0	0	0	0	0	0	0	0	0	0
NC_022541	40826	CGAAGCCGAA.GCTGTCGGCA	G	A	40	PASS	NA	GT	0	0	0	0	0	0	0	1	1	0	0	1	1	0	1	0	0	1	1	0	0	0	1	0	0	0	0	1	1	1	1	1	1	0	0	0	0	1	1	1	1
NC_022541	40835	AGCTGTCGGC.ACCGAGCAGC	A	G	40	PASS	NA	GT	0	1	1	1	1	1	1	0	0	0	1	0	0	1	0	0	1	0	0	1	1	1	0	0	1	1	1	0	0	0	0	0	0	1	1	1	1	0	0	0	0
NC_022541	40844	CACCGAGCAG.CGCGGCCTTG	C	T	40	PASS	NA	GT	0	0	1	1	1	1	1	0	0	0	1	0	0	1	0	0	1	0	0	1	1	1	0	0	1	1	1	0	0	0	0	0	0	1	1	1	1	0	0	0	0
NC_022541	40853	GCGCGGCCTT.GACCACGTCC	G	C	40	PASS	NA	GT	0	0	0	0	0	0	0	0	0	0	0	0	0	0	0	0	0	0	0	0	0	0	0	0	0	0	0	0	0	0	0	0	0	0	0	0	0	0	0	0	0
NC_022541	40856	CGGCCTTGAC.CACGTCCAGG	C	T	40	PASS	NA	GT	0	0	0	0	0	0	0	0	0	0	0	0	0	0	0	0	0	0	0	0	0	0	0	0	0	0	0	0	0	0	0	0	0	0	0	0	0	0	0	0	0
NC_022541	40868	CGTCCAGGCC.GGTCTTCAGG	G	A	40	PASS	NA	GT	0	1	0	0	0	0	0	0	0	0	0	0	0	0	0	0	0	0	0	0	0	0	0	0	0	0	0	0	0	0	0	0	0	0	0	0	0	0	0	0	0
NC_022541	40876	CCGGTCTTCA.GGCCGCCATC	G	A	40	PASS	NA	GT	0	0	1	1	1	1	1	0	0	0	1	0	0	1	0	0	1	0	0	1	1	1	0	0	1	1	1	0	0	0	0	0	0	1	1	1	1	0	0	0	0
NC_022541	40877	CGGTCTTCAG.GCCGCCATCG	G	C	40	PASS	NA	GT	0	0	1	1	1	1	1	0	0	0	1	0	0	1	0	0	1	0	0	1	1	1	0	0	1	1	1	0	0	0	0	0	0	1	1	1	1	0	0	0	0
NC_022541	40895	CGGTCTGCAG.GATGGTGCGC	G	A	40	PASS	NA	GT	0	0	0	0	0	0	0	0	0	0	0	0	0	0	0	0	0	0	0	0	0	0	0	0	0	0	0	0	0	0	0	0	0	0	0	0	0	0	0	0	0
NC_022541	40913	GCTCGCGCAG.GTCGTTGGCA	G	A	40	PASS	NA	GT	0	1	0	0	0	0	0	0	0	0	0	0	0	0	0	0	0	0	0	0	0	0	0	0	0	0	0	0	0	0	0	0	0	0	0	0	0	0	0	0	0
NC_022541	40916	CGCGCAGGTC.GTTGGCAACC	G	A	40	PASS	NA	GT	0	0	0	0	0	0	0	0	0	0	0	0	0	1	0	0	0	0	0	0	0	0	0	0	0	0	1	0	0	0	0	0	0	0	0	1	0	0	0	0	0
NC_022541	40922	GGTCGTTGGC.AACCAGCGCC	A	C	40	PASS	NA	GT	0	1	1	1	1	1	1	1	1	0	1	1	1	1	1	0	1	1	1	1	1	1	1	0	1	1	1	1	1	1	1	1	1	1	1	1	1	1	1	1	1
NC_022541	40927	TTGGCAACCA.GCGCCTGGTG	G	A	40	PASS	NA	GT	0	0	0	0	0	0	0	1	1	0	0	1	1	0	1	0	0	1	1	0	0	0	1	0	0	0	0	1	1	1	1	1	1	0	0	0	0	1	1	1	1
NC_022541	40928	TGGCAACCAG.CGCCTGGTGC	C	T,G	40	PASS	NA	GT	0	0	1	1	1	1	1	1	1	0	1	1	1	0	1	0	1	1	1	1	1	1	1	0	1	1	0	1	1	1	1	1	1	1	1	0	1	1	1	1	1
NC_022541	40961	CCAGTTCCCA.CGGCACGCCG	C	T	40	PASS	NA	GT	0	0	0	0	0	0	0	0	0	0	0	0	0	1	0	0	0	0	0	0	0	0	0	0	0	0	1	0	0	0	0	0	0	0	0	1	0	0	0	0	0
NC_022541	40964	GTTCCCACGG.CACGCCGGCA	C	T	40	PASS	NA	GT	0	0	0	0	0	0	0	0	0	0	0	0	0	0	0	0	0	0	0	0	0	0	0	0	0	0	0	0	0	0	0	0	0	0	0	0	0	0	0	0	0
NC_022541	40970	ACGGCACGCC.GGCATAGCGG	G	T	40	PASS	NA	GT	0	0	0	0	0	0	0	0	0	0	0	0	0	0	0	0	0	1	0	0	0	0	0	0	0	0	0	0	0	0	0	0	1	0	0	0	0	0	0	0	0
NC_022541	40985	AGCGGATCGA.ACTGACCGGG	A	G	40	PASS	NA	GT	0	0	0	0	0	0	0	1	1	0	0	1	1	1	1	0	0	1	1	0	0	0	1	0	0	0	1	1	1	1	1	1	1	0	0	1	0	1	1	1	1
NC_022541	40990	ATCGAACTGA.CCGGGCTGGC	C	T	40	PASS	NA	GT	0	0	0	0	0	0	0	0	0	0	0	0	0	0	0	0	0	0	0	0	0	0	0	0	0	0	0	0	0	0	0	0	0	0	0	0	0	0	0	0	0
NC_022541	40991	TCGAACTGAC.CGGGCTGGCA	C	T	40	PASS	NA	GT	0	0	0	0	0	0	0	0	0	0	0	0	0	0	0	0	0	0	0	0	0	0	0	0	0	0	0	0	0	0	0	0	0	0	0	0	0	0	0	0	0
NC_022541	41000	CCGGGCTGGC.ACCGGTGCCG	A	G	40	PASS	NA	GT	0	0	0	0	0	0	0	0	0	0	0	0	0	1	0	0	0	0	0	0	0	0	0	0	0	0	1	0	0	0	0	0	0	0	0	1	0	0	0	0	0
NC_022541	41024	CATGGCCGGA.CACGGTGATC	C	G	40	PASS	NA	GT	0	0	0	0	0	0	0	0	0	0	0	0	0	1	0	0	0	0	0	0	0	0	0	0	0	0	1	0	0	0	0	0	0	0	0	1	0	0	0	0	0
NC_022541	41030	CGGACACGGT.GATCAGATCG	G	A	40	PASS	NA	GT	0	0	0	0	0	0	0	0	0	0	0	0	0	1	0	0	0	0	0	0	0	0	0	0	0	0	1	0	0	0	0	0	0	0	0	1	0	0	0	0	0
NC_022541	41036	CGGTGATCAG.ATCGGCGCCA	A	G	40	PASS	NA	GT	0	1	0	0	0	0	0	0	0	0	0	0	0	1	0	0	0	0	0	0	0	0	0	0	0	0	1	0	0	0	0	0	0	0	0	1	0	0	0	0	0
NC_022541	41045	GATCGGCGCC.AGCCTTGACC	A	G,C	40	PASS	NA	GT	0	1	1	1	1	1	1	0	0	0	1	0	0	2	0	0	1	0	0	1	1	1	0	0	1	1	2	0	0	0	0	0	0	1	1	2	1	0	0	0	0
NC_022541	41060	TGACCACGCC.GGCGGCAATC	G	A	40	PASS	NA	GT	0	0	1	1	1	1	1	0	0	0	1	0	0	0	0	0	1	0	0	1	1	1	0	0	1	1	0	0	0	0	0	0	0	1	1	0	1	0	0	0	0
NC_022541	41063	CCACGCCGGC.GGCAATCGTG	G	T	40	PASS	NA	GT	0	0	0	0	0	0	0	0	0	0	0	0	0	1	0	0	0	0	0	0	0	0	0	0	0	0	1	0	0	0	0	0	0	0	0	1	0	0	0	0	0
NC_022541	41066	CGCCGGCGGC.AATCGTGCCG	A	G	40	PASS	NA	GT	0	0	1	1	1	1	1	0	0	0	1	0	0	1	0	0	1	0	0	1	1	1	0	0	1	1	1	0	0	0	0	0	0	1	1	1	1	0	0	0	0
NC_022541	41087	CGCCGGCATG.TGCCACCAGC	T	C,G	40	PASS	NA	GT	0	1	2	2	2	2	2	1	1	0	2	1	1	1	1	0	2	1	1	2	2	2	1	0	2	2	1	1	1	1	1	1	1	2	2	1	2	1	1	1	1
NC_022541	41090	CGGCATGTGC.CACCAGCTTC	C	G,T	40	PASS	NA	GT	0	0	1	1	1	1	1	0	0	0	1	0	0	0	0	0	1	0	0	1	1	1	0	0	1	1	0	0	0	0	0	0	0	1	1	0	1	0	0	0	0
NC_022541	41096	GTGCCACCAG.CTTCACCGAC	C	T	40	PASS	NA	GT	0	0	0	1	0	0	0	0	0	0	1	0	0	0	0	0	1	0	0	1	1	0	0	0	1	1	0	0	0	0	0	0	0	0	1	0	1	0	0	0	0
NC_022541	41105	GCTTCACCGA.CACCAGCGCG	C	G	40	PASS	NA	GT	0	1	0	0	0	0	0	0	0	0	0	0	0	0	0	0	0	0	0	0	0	0	0	0	0	0	0	0	0	0	0	0	0	0	0	0	0	0	0	0	0
NC_022541	41110	ACCGACACCA.GCGCGGTGGG	G	T	40	PASS	NA	GT	0	0	0	0	0	0	0	0	0	0	0	0	0	0	0	0	0	0	0	0	0	0	0	0	0	0	0	0	0	0	0	0	0	0	0	0	0	0	0	0	0
NC_022541	41114	ACACCAGCGC.GGTGGGGTTG	G	C	40	PASS	NA	GT	0	0	0	0	0	0	0	0	0	0	0	0	0	0	0	0	0	0	0	0	0	0	0	0	0	0	0	0	0	0	0	0	0	0	0	0	0	0	0	0	0
NC_022541	41117	CCAGCGCGGT.GGGGTTGACC	G	C	40	PASS	NA	GT	0	1	1	1	1	1	1	1	1	0	1	1	1	1	1	0	1	1	1	1	1	1	1	0	1	1	1	1	1	1	1	1	1	1	1	1	1	1	1	1	1
NC_022541	41120	GCGCGGTGGG.GTTGACCTGC	G	A	40	PASS	NA	GT	0	0	1	1	1	1	1	0	0	0	1	0	0	0	0	0	1	0	0	1	1	1	0	0	1	1	0	0	0	0	0	0	0	1	1	0	1	0	0	0	0
NC_022541	41126	TGGGGTTGAC.CTGCTTGAGG	C	T	40	PASS	NA	GT	0	0	0	0	0	0	0	0	0	0	0	0	0	0	0	0	0	0	0	0	0	0	0	0	0	0	0	0	0	0	0	0	0	0	0	0	0	0	0	0	0
NC_022541	41150	AGATCAGCTG.GGCCAGGTCT	G	C	40	PASS	NA	GT	0	1	1	1	1	1	1	0	0	0	1	0	0	0	0	0	1	0	0	1	1	1	0	0	1	1	0	0	0	0	0	0	0	1	1	0	1	0	0	0	0
NC_022541	41153	TCAGCTGGGC.CAGGTCTTCG	C	G	40	PASS	NA	GT	0	0	0	0	0	0	0	0	0	0	0	0	0	1	0	0	0	0	0	0	0	0	0	0	0	0	1	0	0	0	0	0	0	0	0	1	0	0	0	0	0
NC_022541	41156	GCTGGGCCAG.GTCTTCGATC	G	A	40	PASS	NA	GT	0	0	1	1	1	1	1	0	0	0	1	0	0	0	0	0	1	0	0	1	1	1	0	0	1	1	0	0	0	0	0	0	0	1	1	0	1	0	0	0	0
NC_022541	41159	GGGCCAGGTC.TTCGATCGAA	T	C	40	PASS	NA	GT	0	0	1	1	1	1	1	0	0	0	1	0	0	0	0	0	1	0	0	1	1	1	0	0	1	1	0	0	0	0	0	0	0	1	1	0	1	0	0	0	0
NC_022541	41165	GGTCTTCGAT.CGAATAGATG	C	G	40	PASS	NA	GT	0	1	0	0	0	0	0	0	0	0	0	0	0	0	0	0	0	0	0	0	0	0	0	0	0	0	0	0	0	0	0	0	0	0	0	0	0	0	0	0	0
NC_022541	41177	AATAGATGTC.GTGATGCGGT	G	A	40	PASS	NA	GT	0	0	0	0	0	0	0	0	0	0	0	0	0	1	0	0	0	0	0	0	0	0	0	0	0	0	1	0	0	0	0	0	0	0	0	1	0	0	0	0	0
NC_022541	41180	AGATGTCGTG.ATGCGGTGGC	A	G	40	PASS	NA	GT	0	0	1	1	1	1	1	0	0	0	1	0	0	1	0	0	1	0	0	1	1	1	0	0	1	1	1	0	0	0	0	0	0	1	1	1	1	0	0	0	0
NC_022541	41186	CGTGATGCGG.TGGCGGGCTG	T	C	40	PASS	NA	GT	0	1	1	1	1	1	1	0	0	0	1	0	0	0	0	0	1	0	0	1	1	1	0	0	1	1	0	0	0	0	0	0	0	1	1	0	1	0	0	0	0
NC_022541	41192	GCGGTGGCGG.GCTGATCAGG	G	C	40	PASS	NA	GT	0	0	1	1	1	1	1	0	0	0	1	0	0	1	0	0	1	0	0	1	1	1	0	0	1	1	1	0	0	0	0	0	0	1	1	1	1	0	0	0	0
NC_022541	41193	CGGTGGCGGG.CTGATCAGGC	C	G	40	PASS	NA	GT	0	0	1	1	1	1	1	0	0	0	1	0	0	1	0	0	1	0	0	1	1	1	0	0	1	1	1	0	0	0	0	0	0	1	1	1	1	0	0	0	0
NC_022541	41194	GGTGGCGGGC.TGATCAGGCC	T	A	40	PASS	NA	GT	0	0	1	1	1	1	1	0	0	0	1	0	0	1	0	0	1	0	0	1	1	1	0	0	1	1	1	0	0	0	0	0	0	1	1	1	1	0	0	0	0
NC_022541	41222	GCTTGGCGTA.GCGCAGCCGG	G	A	40	PASS	NA	GT	0	0	0	0	0	0	0	0	0	0	0	0	0	1	0	0	0	0	0	0	0	0	0	0	0	0	1	0	0	0	0	0	0	0	0	1	0	0	0	0	0
NC_022541	41231	AGCGCAGCCG.GGCAATCAGC	G	C	40	PASS	NA	GT	0	0	0	0	0	0	0	0	0	0	0	0	0	0	0	0	0	0	0	0	0	0	0	0	0	0	0	0	0	0	0	0	0	0	0	0	0	0	0	0	0
NC_022541	41234	GCAGCCGGGC.AATCAGCTCG	A	G	40	PASS	NA	GT	0	1	1	1	1	1	1	1	1	0	1	1	1	1	1	0	1	1	1	1	1	1	1	0	1	1	1	1	1	1	1	1	1	1	1	1	1	1	1	1	1
NC_022541	41240	GGGCAATCAG.CTCGTTGACC	C	T	40	PASS	NA	GT	0	1	1	1	1	1	1	0	0	0	1	0	0	0	0	0	1	0	0	1	1	1	0	0	1	1	0	0	0	0	0	0	0	1	1	0	1	0	0	0	0
NC_022541	41263	TGGCCGGGCA.GCTGACCGCC	G	A	40	PASS	NA	GT	0	0	0	0	0	0	0	0	0	0	0	0	0	0	0	0	0	0	0	0	0	0	0	0	0	0	0	0	0	0	0	0	0	0	0	0	0	0	0	0	0
NC_022541	41267	CGGGCAGCTG.ACCGCCTTCG	A	G	40	PASS	NA	GT	0	1	1	1	1	1	1	1	1	0	1	1	1	1	1	0	1	1	1	1	1	1	1	0	1	1	1	1	1	1	1	1	1	1	1	1	1	1	1	1	1
NC_022541	41273	GCTGACCGCC.TTCGCCGGGC	T	C	40	PASS	NA	GT	0	1	0	0	0	0	0	0	0	0	0	0	0	0	0	0	0	0	0	0	0	0	0	0	0	0	0	0	0	0	0	0	0	0	0	0	0	0	0	0	0
NC_022541	41279	CGCCTTCGCC.GGGCTTGGCA	G	T	40	PASS	NA	GT	0	0	0	0	0	0	0	0	0	0	0	0	0	0	0	0	0	0	0	0	0	0	0	0	0	0	0	0	0	0	0	0	0	0	0	0	0	0	0	0	0
NC_022541	41288	CGGGCTTGGC.ACCCTGGGCG	A	G	40	PASS	NA	GT	0	1	1	1	1	1	1	1	1	0	1	1	1	1	1	0	1	1	1	1	1	1	1	0	1	1	1	1	1	1	1	1	1	1	1	1	1	1	1	1	1
NC_022541	41311	TTGATCTGCA.GCACTTCGGC	G	A	40	PASS	NA	GT	0	0	0	0	0	0	0	0	0	0	0	0	0	0	0	0	0	0	0	0	0	0	0	0	0	0	0	0	0	0	0	0	0	0	0	0	0	0	0	0	0
NC_022541	41315	TCTGCAGCAC.TTCGGCGTTG	T	C	40	PASS	NA	GT	0	1	1	1	1	1	1	0	0	0	1	0	0	1	0	0	1	0	0	1	1	1	0	0	1	1	1	0	0	0	0	0	0	1	1	1	1	0	0	0	0
NC_022541	41321	GCACTTCGGC.GTTGACCAGA	G	A	40	PASS	NA	GT	0	1	1	1	1	1	1	0	0	0	1	0	0	0	0	0	1	0	0	1	1	1	0	0	1	1	0	0	0	0	0	0	0	1	1	0	1	0	0	0	0
NC_022541	41330	CGTTGACCAG.ATATTCGGGA	A	G	40	PASS	NA	GT	0	1	1	1	1	1	1	0	0	0	1	0	0	1	0	0	1	0	0	1	1	1	0	0	1	1	1	0	0	0	0	0	0	1	1	1	1	0	0	0	0
NC_022541	41333	TGACCAGATA.TTCGGGAGTG	T	C	40	PASS	NA	GT	0	0	1	1	1	1	1	0	0	0	1	0	0	0	0	0	1	0	0	1	1	1	0	0	1	1	0	0	0	0	0	0	0	1	1	0	1	0	0	0	0
NC_022541	41336	CCAGATATTC.GGGAGTGACA	G	C	40	PASS	NA	GT	0	1	1	1	1	1	1	0	0	0	1	1	1	1	0	0	1	1	0	1	1	1	0	0	1	1	1	0	0	0	0	0	1	1	1	1	1	0	0	0	0
NC_022541	41339	GATATTCGGG.AGTGACACCG	A	G	40	PASS	NA	GT	0	1	1	1	1	1	1	0	0	0	1	0	0	1	0	0	1	0	0	1	1	1	0	0	1	1	1	0	0	0	0	0	0	1	1	1	1	0	0	0	0
NC_022541	41342	ATTCGGGAGT.GACACCGAAG	G	C	40	PASS	NA	GT	0	1	1	1	1	1	1	1	1	0	1	1	1	0	1	0	1	1	1	1	1	1	1	0	1	1	0	1	1	1	1	1	1	1	1	0	1	1	1	1	1
NC_022541	41345	CGGGAGTGAC.ACCGAAGCGG	A	G	40	PASS	NA	GT	0	1	1	1	1	1	1	1	1	0	1	1	1	0	1	0	1	1	1	1	1	1	1	0	1	1	0	1	1	1	1	1	1	1	1	0	1	1	1	1	1
NC_022541	41360	AGCGGCCGGA.GGCCACCTGC	G	A	40	PASS	NA	GT	0	0	1	1	1	1	1	0	0	0	1	0	0	0	0	0	1	0	0	1	1	1	0	0	1	1	0	0	0	0	0	0	0	1	1	0	1	0	0	0	0
NC_022541	42130	ATGTGGTGCG.GGTCGCGCGC	G	C	40	PASS	NA	GT	0	0	0	0	0	0	0	0	0	0	0	0	0	0	0	0	0	0	0	0	0	0	0	0	0	0	0	0	0	0	0	0	0	0	0	0	0	0	0	0	0
NC_022541	42131	TGTGGTGCGG.GTCGCGCGCG	G	A	40	PASS	NA	GT	0	0	0	0	0	0	0	0	0	0	0	0	0	0	0	0	0	0	0	0	0	0	0	0	0	0	0	0	0	0	0	0	0	0	0	0	0	0	0	0	0
NC_022541	42146	GCGCGGTGCC.GGTCTCGATG	G	T	40	PASS	NA	GT	0	0	0	0	0	0	0	0	0	0	0	1	0	0	0	0	0	0	0	0	0	0	0	0	0	0	0	0	0	0	0	0	0	0	0	0	0	0	0	0	0
NC_022541	42182	AGCGCAGGCC.CACCTTGCAC	C	T	40	PASS	NA	GT	0	0	0	0	0	0	0	0	0	0	0	0	0	0	0	0	0	0	0	0	0	0	0	0	0	0	0	0	0	0	0	0	0	0	0	0	0	0	0	0	0
NC_022541	42200	ACAGGTGGTG.ATGCACCGCG	A	G	40	PASS	NA	GT	0	0	1	1	1	1	1	0	0	0	1	0	0	1	0	0	1	0	0	1	1	1	0	0	1	1	1	0	0	0	0	0	0	1	1	1	1	0	0	0	0
NC_022541	42209	GATGCACCGC.GCCGGTGGCC	G	C	40	PASS	NA	GT	0	0	0	0	0	0	0	0	0	0	0	0	0	0	0	0	0	0	0	0	0	0	0	0	0	0	0	0	0	0	0	0	0	0	0	0	0	0	0	0	0
NC_022541	42215	CCGCGCCGGT.GGCCAGCAGC	G	A	40	PASS	NA	GT	0	0	0	0	0	0	0	0	0	0	0	1	1	0	0	0	0	0	0	0	0	0	0	0	0	0	0	0	0	0	0	0	0	0	0	0	0	0	0	0	0
NC_022541	42227	CCAGCAGCGC.ATGCGCCATC	A	G	40	PASS	NA	GT	0	0	0	0	0	0	0	0	0	0	0	0	0	0	0	0	0	0	0	0	0	0	0	0	0	0	0	0	0	0	0	0	0	0	0	0	0	0	0	0	0
NC_022541	42257	GCACCGGGTA.GCGGTCGGAC	G	A	40	PASS	NA	GT	0	1	0	0	0	0	0	0	0	0	0	0	0	1	0	0	0	0	0	0	0	0	0	0	0	0	1	0	0	0	0	0	0	0	0	1	0	0	0	0	0
NC_022541	42263	GGTAGCGGTC.GGACAGCAGC	G	C	40	PASS	NA	GT	0	0	0	0	0	0	0	0	0	0	0	0	0	1	0	0	0	0	0	0	0	0	0	0	0	0	1	0	0	0	0	0	0	0	0	1	0	0	0	0	0
NC_022541	42278	GCAGCAGCAT.CACCGCACCG	C	G	40	PASS	NA	GT	0	0	1	1	1	1	1	0	0	0	1	0	0	0	0	0	1	0	0	1	1	1	0	0	1	1	0	0	0	0	0	0	0	1	1	0	1	0	0	0	0
NC_022541	42281	GCAGCATCAC.CGCACCGGCG	C	G	40	PASS	NA	GT	0	0	1	1	1	1	1	0	0	0	1	0	0	0	0	0	1	0	0	1	1	1	0	0	1	1	0	0	0	0	0	0	0	1	1	0	1	0	0	0	0
NC_022541	42284	GCATCACCGC.ACCGGCGCGC	A	G,C	40	PASS	NA	GT	0	1	1	1	1	1	1	0	0	0	1	0	0	1	0	0	1	0	0	1	1	1	0	0	1	1	1	0	0	0	0	0	0	1	1	1	1	0	0	0	0
NC_022541	42287	TCACCGCACC.GGCGCGCGCT	G	A	40	PASS	NA	GT	0	0	1	1	1	1	1	0	0	0	1	0	0	1	0	0	1	0	0	1	1	1	0	0	1	1	1	0	0	0	0	0	0	1	1	1	1	0	0	0	0
NC_022541	42288	CACCGCACCG.GCGCGCGCTG	G	T	40	PASS	NA	GT	0	1	1	1	1	1	1	0	0	0	1	0	0	1	0	0	1	0	0	1	1	1	0	0	1	1	1	0	0	0	0	0	0	1	1	1	1	0	0	0	0
NC_022541	42296	CGGCGCGCGC.TGCGGCTTCC	T	G,A	40	PASS	NA	GT	0	1	2	2	2	2	2	0	0	0	2	0	0	2	0	0	2	0	0	2	2	2	0	0	2	2	2	0	0	0	0	0	0	2	2	2	2	0	0	0	0
NC_022541	42299	CGCGCGCTGC.GGCTTCCACC	G	C	40	PASS	NA	GT	0	0	1	1	1	1	1	0	0	0	1	0	0	1	0	0	1	0	0	1	1	1	0	0	1	1	1	0	0	0	0	0	0	1	1	1	1	0	0	0	0
NC_022541	42323	GGCAGATGCG.TTCCAACCCG	T	C	40	PASS	NA	GT	0	1	0	0	0	0	0	0	0	0	0	0	0	0	0	0	0	0	0	0	0	0	0	0	0	0	0	0	0	0	0	0	0	0	0	0	0	0	0	0	0
NC_022541	42328	ATGCGTTCCA.ACCCGGCCTT	A	G	40	PASS	NA	GT	0	1	1	1	1	1	1	1	1	0	1	1	1	1	1	0	1	1	1	1	1	1	1	0	1	1	1	1	1	1	1	1	1	1	1	1	1	1	1	1	1
NC_022541	42329	TGCGTTCCAA.CCCGGCCTTG	C	G	40	PASS	NA	GT	0	0	0	0	0	0	0	0	0	0	0	0	0	0	0	0	0	0	0	0	0	0	0	0	0	0	0	0	0	0	0	0	0	0	0	0	0	0	0	0	0
NC_022541	42341	CGGCCTTGAG.GCCTTCTTCC	G	A	40	PASS	NA	GT	0	0	0	0	0	0	0	0	0	0	0	0	0	0	0	0	0	1	0	0	0	0	0	0	0	0	0	0	0	0	0	0	1	0	0	0	0	0	0	0	0
NC_022541	42347	TGAGGCCTTC.TTCCAGGCTA	T	C	40	PASS	NA	GT	0	0	0	0	0	0	0	0	0	0	0	0	0	0	0	0	0	0	0	0	0	0	0	0	0	0	0	0	0	0	0	0	0	0	0	0	0	0	0	0	0
NC_022541	42356	CTTCCAGGCT.ATAGGACAGG	A	G	40	PASS	NA	GT	0	1	1	1	1	1	1	0	0	0	1	1	1	0	0	0	1	1	0	1	1	1	0	0	1	1	0	0	0	0	0	0	1	1	1	0	1	0	0	0	0
NC_022541	42377	CGATCAGGCG.GTTGCGCTCG	G	A	40	PASS	NA	GT	0	0	0	0	0	0	0	0	0	0	0	0	0	1	0	0	0	0	0	0	0	0	0	0	0	0	1	0	0	0	0	0	0	0	0	1	0	0	0	0	0
NC_022541	42389	TGCGCTCGAC.GTACTGCTCC	G	A	40	PASS	NA	GT	0	0	0	0	0	0	0	0	0	0	0	0	0	0	0	0	0	0	0	0	0	0	0	0	0	0	0	0	0	0	0	0	0	0	0	0	0	0	0	0	0
NC_022541	42392	GCTCGACGTA.CTGCTCCATC	C	T	40	PASS	NA	GT	0	0	0	0	0	0	0	0	0	0	0	1	1	0	0	0	0	1	0	0	0	0	0	0	0	0	0	0	0	0	0	0	1	0	0	0	0	0	0	0	0
NC_022541	42396	GACGTACTGC.TCCATCTTCA	T	G	40	PASS	NA	GT	0	0	0	0	0	0	0	0	0	0	0	0	0	0	0	0	0	0	0	0	0	0	0	0	0	0	0	0	0	0	0	0	0	0	0	0	0	0	0	0	0
NC_022541	42397	ACGTACTGCT.CCATCTTCAG	C	G	40	PASS	NA	GT	0	0	0	0	0	0	0	0	0	0	0	0	0	0	0	0	0	0	0	0	0	0	0	0	0	0	0	0	0	0	0	0	0	0	0	0	0	0	0	0	0
NC_022541	42406	TCCATCTTCA.GCAGCTGGCG	G	A	40	PASS	NA	GT	0	0	1	1	1	1	1	0	0	0	1	0	0	0	0	0	1	0	0	1	1	1	0	0	1	1	0	0	0	0	0	0	0	1	1	0	1	0	0	0	0
NC_022541	42419	GCTGGCGCAG.TTTGCGCTGG	T	C	40	PASS	NA	GT	0	1	1	1	1	1	1	0	0	0	1	0	0	1	0	0	1	0	0	1	1	1	0	0	1	1	1	0	0	0	0	0	0	1	1	1	1	0	0	0	0
NC_022541	42443	GCACCGGCGA.ATTGAGGATG	A	G	40	PASS	NA	GT	0	1	0	0	0	0	0	0	0	0	0	0	0	0	0	0	0	0	0	0	0	0	0	0	0	0	0	0	0	0	0	0	0	0	0	0	0	0	0	0	0
NC_022541	43142	ACGCGGCCAG.ATCGGCGTCC	A	G	40	PASS	NA	GT	0	1	1	1	1	1	1	0	0	0	1	0	0	1	0	0	1	1	0	1	1	1	0	0	1	1	1	0	0	0	0	0	1	1	1	1	1	0	0	0	0
NC_022541	43166	ACTCCAGCGA.CTGGGTGGCC	C	T	40	PASS	NA	GT	0	0	0	0	0	0	0	1	1	0	0	1	1	0	1	0	0	1	1	0	0	0	1	0	0	0	0	1	1	1	1	1	1	0	0	0	0	1	1	1	1
NC_022541	43169	CCAGCGACTG.GGTGGCCGGC	G	A	40	PASS	NA	GT	0	0	0	0	0	0	0	0	0	0	0	0	0	0	0	0	0	0	0	0	0	0	0	0	0	0	0	0	0	0	0	0	0	0	0	0	0	0	0	0	0
NC_022541	43172	GCGACTGGGT.GGCCGGCGGC	G	C	40	PASS	NA	GT	0	1	1	1	1	1	1	0	0	0	1	0	0	1	0	0	1	0	0	1	1	1	0	0	1	1	1	0	0	0	0	0	0	1	1	1	1	0	0	0	0
NC_022541	43195	AGGATGCGCA.GCGCCTGCAG	G	A	40	PASS	NA	GT	0	0	0	0	0	0	0	1	1	0	0	1	1	0	1	0	0	0	1	0	0	0	1	0	0	0	0	1	1	1	1	1	0	0	0	0	0	1	1	1	1
NC_022541	43196	GGATGCGCAG.CGCCTGCAGC	C	T	40	PASS	NA	GT	0	0	0	0	0	0	0	0	0	0	0	0	0	0	0	0	0	1	0	0	0	0	0	0	0	0	0	0	0	0	0	0	0	0	0	0	0	0	0	0	0
NC_022541	43217	GGTCCATGCC.GCCGGCGATC	G	A	40	PASS	NA	GT	0	1	1	1	1	1	1	1	1	0	1	1	1	1	1	0	1	1	1	1	1	1	1	0	1	1	1	1	1	1	1	1	1	1	1	1	1	1	1	1	1
NC_022541	43231	GCGATCAGCA.GCTCCAGCAT	G	A	40	PASS	NA	GT	0	0	0	0	0	0	0	1	1	0	0	1	1	0	1	0	0	1	1	0	0	0	1	0	0	0	0	1	1	1	1	1	1	0	0	0	0	1	1	1	1
NC_022541	43262	TCTGCGAATC.GGAGCCGTGC	G	T	40	PASS	NA	GT	0	0	1	1	1	1	1	0	0	0	1	0	0	0	0	0	1	0	0	1	1	1	0	0	1	1	0	0	0	0	0	0	0	1	1	0	1	0	0	0	0
NC_022541	43265	GCGAATCGGA.GCCGTGCATG	G	C	40	PASS	NA	GT	0	0	1	1	1	1	1	0	0	0	1	0	0	1	0	0	1	0	0	1	1	1	0	0	1	1	1	0	0	0	0	0	0	1	1	1	1	0	0	0	0
NC_022541	43286	AGATCACCGG.ATCGAACTGC	A	G	40	PASS	NA	GT	0	0	1	1	1	1	1	0	0	0	1	0	0	1	0	0	1	0	0	1	1	1	0	0	1	1	1	0	0	0	0	0	0	1	1	1	1	0	0	0	0
NC_022541	43292	CCGGATCGAA.CTGCGCGATG	C	T	40	PASS	NA	GT	0	1	1	1	1	1	1	0	0	0	1	0	0	1	0	0	1	0	0	1	1	1	0	0	1	1	1	0	0	0	0	0	0	1	1	1	1	0	0	0	0
NC_022541	43294	GGATCGAACT.GCGCGATGTC	G	C	40	PASS	NA	GT	0	1	1	1	1	1	1	0	0	0	1	0	0	1	0	0	1	0	0	1	1	1	0	0	1	1	1	0	0	0	0	0	0	1	1	1	1	0	0	0	0
NC_022541	43295	GATCGAACTG.CGCGATGTCG	C	G	40	PASS	NA	GT	0	1	1	1	1	1	1	0	0	0	1	0	0	1	0	0	1	0	0	1	1	1	0	0	1	1	1	0	0	0	0	0	0	1	1	1	1	0	0	0	0
NC_022541	43298	CGAACTGCGC.GATGTCGAAG	G	A	40	PASS	NA	GT	0	1	0	0	0	0	0	0	0	0	0	0	0	0	0	0	0	0	0	0	0	0	0	0	0	0	0	0	0	0	0	0	0	0	0	0	0	0	0	0	0
NC_022541	43301	ACTGCGCGAT.GTCGAAGCGC	G	A	40	PASS	NA	GT	0	0	1	1	1	1	1	0	0	0	1	0	0	1	0	0	1	0	0	1	1	1	0	0	1	1	1	0	0	0	0	0	0	1	1	1	1	0	0	0	0
NC_022541	43304	GCGCGATGTC.GAAGCGCGGT	G	A	40	PASS	NA	GT	0	0	0	0	0	0	0	0	0	0	0	0	0	0	0	0	0	0	0	0	0	0	0	0	0	0	0	0	0	0	0	0	0	0	0	0	0	0	0	0	0
NC_022541	43307	CGATGTCGAA.GCGCGGTGTC	G	A	40	PASS	NA	GT	0	0	1	1	1	1	1	0	0	0	1	0	0	1	0	0	1	0	0	1	1	1	0	0	1	1	1	0	0	0	0	0	0	1	1	1	1	0	0	0	0
NC_022541	43313	CGAAGCGCGG.TGTCTGCCAT	T	G	40	PASS	NA	GT	0	1	1	1	1	1	1	1	1	0	1	1	1	1	1	0	1	1	1	1	1	1	1	0	1	1	1	1	1	1	1	1	1	1	1	1	1	1	1	1	1
NC_022541	43322	GTGTCTGCCA.TACCTTGCTG	T	C	40	PASS	NA	GT	0	1	1	1	1	1	1	0	0	0	1	0	0	1	0	0	1	0	0	1	1	1	0	0	1	1	1	0	0	0	0	0	0	1	1	1	1	0	0	0	0
NC_022541	43349	GCGCCCAGCG.CCGGTTGCCT	C	T,G	40	PASS	NA	GT	0	0	1	1	1	1	1	0	0	0	1	0	0	1	0	0	1	0	0	1	1	1	0	0	1	1	1	0	0	0	0	0	0	1	1	1	1	0	0	0	0
NC_022541	43367	CTTCGATGGT.GTTGATTTCC	G	A	40	PASS	NA	GT	0	0	0	0	0	0	0	0	0	0	0	0	0	0	0	0	0	0	0	0	0	0	0	0	0	0	0	0	0	0	0	0	0	0	0	0	0	0	0	0	0
NC_022541	43376	TGTTGATTTC.CCCGTTGTGC	C	G	40	PASS	NA	GT	0	0	1	1	1	1	1	0	0	0	1	0	0	1	0	0	1	0	0	1	1	1	0	0	1	1	1	0	0	0	0	0	0	1	1	1	1	0	0	0	0
NC_022541	43379	TGATTTCCCC.GTTGTGCGCG	G	A	40	PASS	NA	GT	0	0	1	1	1	1	1	0	0	0	1	0	0	1	0	0	1	0	0	1	1	1	0	0	1	1	1	0	0	0	0	0	0	1	1	1	1	0	0	0	0
NC_022541	43385	CCCCGTTGTG.CGCGAGCAGC	C	G	40	PASS	NA	GT	0	0	1	1	1	1	1	0	0	0	1	0	0	1	0	0	1	0	0	1	1	1	0	0	1	1	1	0	0	0	0	0	0	1	1	1	1	0	0	0	0
NC_022541	43403	GCCGGAACGG.ATGCGCCAGC	A	G	40	PASS	NA	GT	0	1	0	0	0	0	0	0	0	0	0	0	0	0	0	0	0	0	0	0	0	0	0	0	0	0	0	0	0	0	0	0	0	0	0	0	0	0	0	0	0
NC_022541	43411	GGATGCGCCA.GCGGCCAGCG	G	A	40	PASS	NA	GT	0	1	0	0	0	0	0	0	0	0	0	0	0	0	0	0	0	0	0	0	0	0	0	0	0	0	0	0	0	0	0	0	0	0	0	0	0	0	0	0	0
NC_022541	43430	GCGGCAGCGT.GTTGGTGGAA	G	A	40	PASS	NA	GT	0	0	1	1	1	1	1	0	0	0	1	0	0	1	0	0	1	0	0	1	1	1	0	0	1	1	1	0	0	0	0	0	0	1	1	1	1	0	0	0	0
NC_022541	43442	TGGTGGAAAA.ACGCTGGTGG	A	G,C	40	PASS	NA	GT	0	0	1	1	1	1	1	0	0	0	1	0	0	1	0	0	1	0	0	1	1	1	0	0	1	1	1	0	0	0	0	0	0	1	1	1	1	0	0	0	0
NC_022541	43451	AACGCTGGTG.GAAGACAATT	G	A	40	PASS	NA	GT	0	1	1	1	1	1	1	0	0	0	1	0	0	1	0	0	1	0	0	1	1	1	0	0	1	1	1	0	0	0	0	0	0	1	1	1	1	0	0	0	0
NC_022541	43454	GCTGGTGGAA.GACAATTGCG	G	C	40	PASS	NA	GT	0	0	1	1	1	1	1	0	0	0	1	1	1	1	0	0	1	1	0	1	1	1	0	0	1	1	1	0	0	0	0	0	1	1	1	1	1	0	0	0	0
NC_022541	43457	GGTGGAAGAC.AATTGCGCTG	A	G	40	PASS	NA	GT	0	0	0	0	0	0	0	0	0	0	0	0	0	0	0	0	0	0	0	0	0	0	0	0	0	0	0	0	0	0	0	0	0	0	0	0	0	0	0	0	0
NC_022541	43460	GGAAGACAAT.TGCGCTGGAT	T	C	40	PASS	NA	GT	0	0	1	1	1	1	1	0	0	0	1	1	1	1	0	0	1	1	0	1	1	1	0	0	1	1	1	0	0	0	0	0	1	1	1	1	1	0	0	0	0
NC_022541	43469	TTGCGCTGGA.TGAGAGGTCG	T	G	40	PASS	NA	GT	0	1	1	1	1	1	1	1	1	0	1	1	1	1	1	0	1	1	1	1	1	1	1	0	1	1	1	1	1	1	1	1	1	1	1	1	1	1	1	1	1
NC_022541	43472	CGCTGGATGA.GAGGTCGCTG	G	C	40	PASS	NA	GT	0	1	1	1	1	1	1	1	1	0	1	1	1	1	1	0	1	1	1	1	1	1	1	0	1	1	1	1	1	1	1	1	1	1	1	1	1	1	1	1	1
NC_022541	43474	CTGGATGAGA.GGTCGCTGCG	G	T	40	PASS	NA	GT	0	0	0	0	0	0	0	0	0	0	0	0	0	0	0	0	0	1	0	0	0	0	0	0	0	0	0	0	0	0	0	0	1	0	0	0	0	0	0	0	0
NC_022541	43475	TGGATGAGAG.GTCGCTGCGC	G	A	40	PASS	NA	GT	0	0	0	0	0	0	0	1	1	0	0	1	1	0	1	0	0	1	1	0	0	0	1	0	0	0	0	1	1	1	1	1	1	0	0	0	0	1	1	1	1
NC_022541	43490	TGCGCTGCAG.GTCCGGGTAG	G	A	40	PASS	NA	GT	0	0	0	0	0	0	0	0	0	0	0	0	0	0	0	0	0	0	0	0	0	0	0	0	0	0	0	0	0	0	0	0	0	0	0	0	0	0	0	0	0
NC_022541	43517	TCAGCTTGTC.AGGCAGCACC	A	C	40	PASS	NA	GT	0	1	1	1	1	1	1	1	1	1	1	1	1	1	1	1	1	1	1	1	1	1	1	0	1	1	1	1	1	1	1	1	1	1	1	1	1	1	1	1	1
NC_022541	43553	TGCCGTTGGG.CGAGAGGGTG	C	G	40	PASS	NA	GT	0	0	1	0	1	1	1	0	0	0	0	0	0	0	0	0	0	0	0	0	0	1	0	0	0	0	0	0	0	0	0	0	0	1	0	0	0	0	0	0	0
NC_022541	43559	TGGGCGAGAG.GGTGGTGACG	G	T	40	PASS	NA	GT	0	0	1	1	1	1	1	0	0	0	1	0	0	0	0	0	1	0	0	1	1	1	0	0	1	1	0	0	0	0	0	0	0	1	1	0	1	0	0	0	0
NC_022541	43568	GGGTGGTGAC.GTAGAAATTT	G	A	40	PASS	NA	GT	0	0	1	1	1	1	1	0	0	0	1	0	0	0	0	0	1	0	0	1	1	1	0	0	1	1	0	0	0	0	0	0	0	1	1	0	1	0	0	0	0
NC_022541	43574	TGACGTAGAA.ATTTTCGACC	A	G	40	PASS	NA	GT	0	1	1	1	1	1	1	0	0	0	1	0	0	0	0	0	1	0	0	1	1	1	0	0	1	1	0	0	0	0	0	0	0	1	1	0	1	0	0	0	0
NC_022541	43576	ACGTAGAAAT.TTTCGACCGC	T	C,G	40	PASS	NA	GT	0	1	1	1	1	1	1	2	2	0	1	2	2	1	2	0	1	2	2	1	1	1	2	0	1	1	1	2	2	2	2	2	2	1	1	1	1	2	2	2	2
NC_022541	43577	CGTAGAAATT.TTCGACCGCA	T	C	40	PASS	NA	GT	0	1	1	1	1	1	1	0	0	0	1	0	0	1	0	0	1	0	0	1	1	1	0	0	1	1	1	0	0	0	0	0	0	1	1	1	1	0	0	0	0
NC_022541	43578	GTAGAAATTT.TCGACCGCAT	T	G	40	PASS	NA	GT	0	1	0	0	0	0	0	0	0	0	0	0	0	0	0	0	0	0	0	0	0	0	0	0	0	0	0	0	0	0	0	0	0	0	0	0	0	0	0	0	0
NC_022541	43579	TAGAAATTTT.CGACCGCATG	C	G	40	PASS	NA	GT	0	1	1	1	1	1	1	0	0	0	1	0	0	1	0	0	1	0	0	1	1	1	0	0	1	1	1	0	0	0	0	0	0	1	1	1	1	0	0	0	0
NC_022541	43580	AGAAATTTTC.GACCGCATGC	G	C	40	PASS	NA	GT	0	1	1	1	1	1	1	0	0	0	1	0	0	1	0	0	1	0	0	1	1	1	0	0	1	1	1	0	0	0	0	0	0	1	1	1	1	0	0	0	0
NC_022541	43583	AATTTTCGAC.CGCATGCAGC	C	G	40	PASS	NA	GT	0	1	1	1	1	1	1	0	0	0	1	0	0	1	0	0	1	0	0	1	1	1	0	0	1	1	1	0	0	0	0	0	0	1	1	1	1	0	0	0	0
NC_022541	43584	ATTTTCGACC.GCATGCAGCG	G	C	40	PASS	NA	GT	0	1	1	1	1	1	1	0	0	0	1	0	0	1	0	0	1	0	0	1	1	1	0	0	1	1	1	0	0	0	0	0	0	1	1	1	1	0	0	0	0
NC_022541	43586	TTTCGACCGC.ATGCAGCGCC	A	C	40	PASS	NA	GT	0	1	1	1	1	1	1	0	0	0	1	0	0	1	0	0	1	0	0	1	1	1	0	0	1	1	1	0	0	0	0	0	0	1	1	1	1	0	0	0	0
NC_022541	43591	ACCGCATGCA.GCGCCTGCTC	G	A	40	PASS	NA	GT	0	0	0	0	0	0	0	0	0	0	0	0	0	1	0	0	0	0	0	0	0	0	0	0	0	0	1	0	0	0	0	0	0	0	0	1	0	0	0	0	0
NC_022541	43592	CCGCATGCAG.CGCCTGCTCG	C	G	40	PASS	NA	GT	0	0	0	0	0	0	0	0	0	0	0	0	0	1	0	0	0	0	0	0	0	0	0	0	0	0	1	0	0	0	0	0	0	0	0	1	0	0	0	0	0
NC_022541	43593	CGCATGCAGC.GCCTGCTCGG	G	T	40	PASS	NA	GT	0	1	1	1	1	1	1	0	0	0	1	0	0	0	0	0	1	0	0	1	1	1	0	0	1	1	0	0	0	0	0	0	0	1	1	0	1	0	0	0	0
NC_022541	43594	GCATGCAGCG.CCTGCTCGGC	C	G	40	PASS	NA	GT	0	1	1	1	1	1	1	0	0	0	1	0	0	0	0	0	1	0	0	1	1	1	0	0	1	1	0	0	0	0	0	0	0	1	1	0	1	0	0	0	0
NC_022541	43607	GCTCGGCGCG.CCGGCGCGCC	C	A,G	40	PASS	NA	GT	0	1	2	2	2	2	2	0	0	0	2	0	0	2	0	0	2	0	0	2	2	2	0	0	2	2	2	0	0	0	0	0	0	2	2	2	2	0	0	0	0
NC_022541	43613	CGCGCCGGCG.CGCCAGGAAC	C	T,G	40	PASS	NA	GT	0	1	0	0	0	0	0	1	1	0	0	1	1	2	1	0	0	0	1	0	0	0	1	0	0	0	2	1	1	1	1	1	0	0	0	2	0	1	1	1	1
NC_022541	43625	CCAGGAACAG.CGCCAGGGTG	C	T	40	PASS	NA	GT	0	0	1	1	1	1	1	0	0	0	1	0	0	1	0	0	1	0	0	1	1	1	0	0	1	1	1	0	0	0	0	0	0	1	1	1	1	0	0	0	0
NC_022541	43634	GCGCCAGGGT.GAAGCCGTCT	G	A	40	PASS	NA	GT	0	1	1	1	1	1	1	0	0	0	1	0	0	1	0	0	1	0	0	1	1	1	0	0	1	1	1	0	0	0	0	0	0	1	1	1	1	0	0	0	0
NC_022541	43652	CTTCGGTCTG.TTCGGCACCG	T	C	40	PASS	NA	GT	0	1	1	1	1	1	1	0	0	0	1	0	0	1	0	0	1	0	0	1	1	1	0	0	1	1	1	0	0	0	0	0	0	1	1	1	1	0	0	0	0
NC_022541	43655	CGGTCTGTTC.GGCACCGGCA	G	C	40	PASS	NA	GT	0	1	1	1	1	1	1	0	0	0	1	0	0	1	0	0	1	0	0	1	1	1	0	0	1	1	1	0	0	0	0	0	0	1	1	1	1	0	0	0	0
NC_022541	43658	TCTGTTCGGC.ACCGGCATCG	A	G	40	PASS	NA	GT	0	0	1	1	1	1	1	0	0	0	1	0	0	1	0	0	1	0	0	1	1	1	0	0	1	1	1	0	0	0	0	0	0	1	1	1	1	0	0	0	0
NC_022541	43670	CGGCATCGAC.AAAGACCTGT	A	G	40	PASS	NA	GT	0	1	0	0	0	0	0	0	0	0	0	0	0	0	0	0	0	0	0	0	0	0	0	0	0	0	0	0	0	0	0	0	0	0	0	0	0	0	0	0	0
NC_022541	43673	CATCGACAAA.GACCTGTTCG	G	T,C	40	PASS	NA	GT	0	1	2	2	2	2	2	0	0	0	2	0	0	2	0	0	2	0	0	2	2	2	0	0	2	2	2	0	0	0	0	0	0	2	2	2	2	0	0	0	0
NC_022541	43675	TCGACAAAGA.CCTGTTCGAT	C	G	40	PASS	NA	GT	0	0	0	0	0	0	0	0	0	0	0	0	0	0	0	0	0	0	0	0	0	0	0	0	0	0	0	0	0	0	0	0	0	0	0	0	0	0	0	0	0
NC_022541	43679	CAAAGACCTG.TTCGATGCGC	T	C	40	PASS	NA	GT	0	1	1	1	1	1	1	0	0	0	1	0	0	1	0	0	1	1	0	1	1	1	0	0	1	1	1	0	0	0	0	0	1	1	1	1	1	0	0	0	0
NC_022541	43682	AGACCTGTTC.GATGCGCGGC	G	C	40	PASS	NA	GT	0	0	0	0	0	0	0	0	1	0	0	0	0	0	0	0	0	0	0	0	0	0	0	0	0	0	0	1	1	0	0	0	0	0	0	0	0	0	1	1	1
NC_022541	43685	CCTGTTCGAT.GCGCGGCAAG	G	A	40	PASS	NA	GT	0	0	0	0	0	0	0	0	0	0	0	0	0	0	0	0	0	0	0	0	0	0	0	0	0	0	0	0	0	0	0	0	1	0	0	0	0	0	0	0	0
NC_022541	43693	ATGCGCGGCA.AGGTATCGCG	A	G	40	PASS	NA	GT	0	0	1	1	1	1	1	0	0	0	1	0	0	1	0	0	1	0	0	1	1	1	0	0	1	1	1	0	0	0	0	0	0	1	1	1	1	0	0	0	0
NC_022541	43697	GCGGCAAGGT.ATCGCGTGCC	A	G	40	PASS	NA	GT	0	1	1	1	1	1	1	0	0	0	1	0	0	1	0	0	1	0	0	1	1	1	0	0	1	1	1	0	0	0	0	0	0	1	1	1	1	0	0	0	0
NC_022541	43703	AGGTATCGCG.TGCCAGCTGG	T	C,G	40	PASS	NA	GT	0	1	1	1	1	1	1	0	0	0	1	0	0	1	0	0	1	0	0	1	1	1	0	0	1	1	1	0	0	0	0	0	0	1	1	1	1	0	0	0	0
NC_022541	43708	TCGCGTGCCA.GCTGGCCGCA	G	A	40	PASS	NA	GT	0	0	0	0	0	0	0	0	0	0	0	0	0	0	0	0	0	1	0	0	0	0	0	0	0	0	0	0	0	0	0	0	1	0	0	0	0	0	0	0	0
NC_022541	43727	ACACGCTGTC.ATCGGTGGGC	A	G	40	PASS	NA	GT	0	1	1	1	1	1	1	0	0	0	1	0	0	1	0	0	1	0	0	1	1	1	0	0	1	1	1	0	0	0	0	0	0	1	1	1	1	0	0	0	0
NC_022541	43751	CGCGCCAGCC.GCGCAAGTGC	G	A	40	PASS	NA	GT	0	0	1	1	1	1	1	0	0	0	1	0	0	1	0	0	1	0	0	1	1	1	0	0	1	1	1	0	0	0	0	0	0	1	1	1	1	0	0	0	0
NC_022541	43754	GCCAGCCGCG.CAAGTGCACG	C	G	40	PASS	NA	GT	0	0	0	0	0	0	0	1	1	0	0	1	1	0	1	0	0	1	1	0	0	0	1	0	0	0	0	1	1	1	1	1	1	0	0	0	0	1	1	1	1
NC_022541	43756	CAGCCGCGCA.AGTGCACGCC	A	G	40	PASS	NA	GT	0	1	1	1	1	1	1	0	0	0	1	0	0	1	0	0	1	0	0	1	1	1	0	0	1	1	1	0	0	0	0	0	0	1	1	1	1	0	0	0	0
NC_022541	43757	AGCCGCGCAA.GTGCACGCCG	G	C	40	PASS	NA	GT	0	1	1	1	1	1	1	0	0	0	1	0	0	1	0	0	1	0	0	1	1	1	0	0	1	1	1	0	0	0	0	0	0	1	1	1	1	0	0	0	0
NC_022541	43766	AGTGCACGCC.GGCGCTGTGC	G	A	40	PASS	NA	GT	0	0	0	0	0	0	0	0	0	0	0	0	0	1	0	0	0	0	0	0	0	0	0	0	0	0	1	0	0	0	0	0	0	0	0	1	0	0	0	0	0
NC_022541	43770	CACGCCGGCG.CTGTGCAGCT	C	G,T	40	PASS	NA	GT	0	1	0	0	0	0	0	2	2	0	0	0	0	0	2	0	0	0	2	0	0	0	2	0	0	0	0	2	2	2	2	2	0	0	0	0	0	2	2	2	2
NC_022541	43771	ACGCCGGCGC.TGTGCAGCTG	T	C	40	PASS	NA	GT	0	1	0	0	0	0	0	0	0	0	0	0	0	0	0	0	0	0	0	0	0	0	0	0	0	0	0	0	0	0	0	0	0	0	0	0	0	0	0	0	0
NC_022541	43772	CGCCGGCGCT.GTGCAGCTGC	G	C	40	PASS	NA	GT	0	1	0	0	0	0	0	0	0	0	0	0	0	0	0	0	0	0	0	0	0	0	0	0	0	0	0	0	0	0	0	0	0	0	0	0	0	0	0	0	0
NC_022541	43773	GCCGGCGCTG.TGCAGCTGCG	T	A	40	PASS	NA	GT	0	0	1	1	1	1	1	0	0	0	1	0	0	1	0	0	1	0	0	1	1	1	0	0	1	1	1	0	0	0	0	0	0	1	1	1	1	0	0	0	0
NC_022541	43777	GCGCTGTGCA.GCTGCGCTTC	G	A	40	PASS	NA	GT	0	0	1	1	1	1	1	0	0	0	1	0	0	1	0	0	1	0	0	1	1	1	0	0	1	1	1	0	0	0	0	0	0	1	1	1	1	0	0	0	0
NC_022541	43781	TGTGCAGCTG.CGCTTCCAGT	C	G	40	PASS	NA	GT	0	0	1	1	1	1	1	0	0	0	1	0	0	1	0	0	1	0	0	1	1	1	0	0	1	1	1	0	0	0	0	0	0	1	1	1	1	0	0	0	0
NC_022541	43782	GTGCAGCTGC.GCTTCCAGTT	G	C	40	PASS	NA	GT	0	0	1	1	1	1	1	0	0	0	1	0	0	1	0	0	1	0	0	1	1	1	0	0	1	1	1	0	0	0	0	0	0	1	1	1	1	0	0	0	0
NC_022541	43783	TGCAGCTGCG.CTTCCAGTTC	C	G,A	40	PASS	NA	GT	0	0	1	1	1	1	1	0	0	0	1	0	0	1	0	0	1	0	0	1	1	1	0	0	1	1	1	0	0	0	0	0	0	1	1	1	1	0	0	0	0
NC_022541	43796	CCAGTTCGGC.CCGACATCGC	C	G,A	40	PASS	NA	GT	0	1	1	1	1	1	1	0	0	0	1	0	0	1	0	0	1	0	0	1	1	1	0	0	1	1	1	0	0	0	0	0	0	1	1	1	1	0	0	0	0
NC_022541	43802	CGGCCCGACA.TCGCGCGGCA	T	G	40	PASS	NA	GT	0	0	1	1	1	1	1	0	0	0	1	0	0	1	0	0	1	0	0	1	1	1	0	0	1	1	1	0	0	0	0	0	0	1	1	1	1	0	0	0	0
NC_022541	43808	GACATCGCGC.GGCATCGGCT	G	C,A	40	PASS	NA	GT	0	0	1	1	1	1	1	2	2	0	1	2	2	1	2	0	1	2	2	1	1	1	2	0	1	1	1	2	2	2	2	2	2	1	1	1	1	2	2	2	2
NC_022541	43811	ATCGCGCGGC.ATCGGCTTCG	A	C,G	40	PASS	NA	GT	0	1	0	0	0	0	0	0	0	0	0	0	0	0	0	0	0	0	0	0	0	0	0	0	0	0	0	0	0	0	0	0	0	0	0	0	0	0	0	0	0
NC_022541	43814	GCGCGGCATC.GGCTTCGTCC	G	A	40	PASS	NA	GT	0	1	1	1	1	1	1	0	0	0	1	0	0	1	0	0	1	0	0	1	1	1	0	0	1	1	1	0	0	0	0	0	0	1	1	1	1	0	0	0	0
NC_022541	43815	CGCGGCATCG.GCTTCGTCCA	G	C	40	PASS	NA	GT	0	1	1	1	1	1	1	0	0	0	1	0	0	1	0	0	1	0	0	1	1	1	0	0	1	1	1	0	0	0	0	0	0	1	1	1	1	0	0	0	0
NC_022541	43816	GCGGCATCGG.CTTCGTCCAG	C	T	40	PASS	NA	GT	0	1	1	1	1	1	1	0	0	0	1	0	0	1	0	0	1	0	0	1	1	1	0	0	1	1	1	0	0	0	0	0	0	1	1	1	1	0	0	0	0
NC_022541	43817	CGGCATCGGC.TTCGTCCAGC	T	C	40	PASS	NA	GT	0	0	0	0	0	0	0	0	0	0	0	0	0	0	0	0	0	0	0	0	0	0	0	0	0	0	0	0	0	0	0	0	0	0	0	0	0	0	0	0	0
NC_022541	43818	GGCATCGGCT.TCGTCCAGCG	T	G	40	PASS	NA	GT	0	0	1	1	1	1	1	0	0	0	1	0	0	1	0	0	1	0	0	1	1	1	0	0	1	1	1	0	0	0	0	0	0	1	1	1	1	0	0	0	0
NC_022541	43826	CTTCGTCCAG.CGGCAGGAAC	C	A,T	40	PASS	NA	GT	0	0	0	0	0	0	0	0	0	0	0	0	0	0	0	0	0	1	0	0	0	0	0	0	0	0	0	0	0	0	0	0	0	0	0	0	0	0	0	0	0
NC_022541	43841	GGAACACCAC.CCCGGCTGCG	C	A	40	PASS	NA	GT	0	1	1	1	1	1	1	1	1	0	1	1	1	1	1	0	1	1	1	1	1	1	1	0	1	1	1	1	1	1	1	1	1	1	1	1	1	1	1	1	1
NC_022541	43847	CCACCCCGGC.TGCGTAGCGC	T	C	40	PASS	NA	GT	0	1	0	0	0	0	0	0	0	0	0	0	0	0	0	0	0	0	0	0	0	0	0	0	0	0	0	0	0	0	0	0	0	0	0	0	0	0	0	0	0
NC_022541	43857	TGCGTAGCGC.GTGCCCAGGG	G	T	40	PASS	NA	GT	0	0	0	0	0	0	0	0	0	0	0	0	0	0	0	0	0	0	0	0	0	0	0	0	0	0	0	0	0	0	0	0	0	0	0	0	0	0	0	0	0
NC_022541	43867	GTGCCCAGGG.TGATGCCGGC	T	G,C	40	PASS	NA	GT	0	1	0	0	0	0	0	0	0	0	0	0	0	0	0	0	0	0	0	0	0	0	0	0	0	0	0	0	0	0	0	0	0	0	0	0	0	0	0	0	0
NC_022541	43877	TGATGCCGGC.ATCACGCGCC	A	G	40	PASS	NA	GT	0	0	0	0	0	0	0	0	0	0	0	0	0	0	0	0	0	0	0	0	0	0	0	0	0	0	0	0	0	0	0	0	0	0	0	0	0	0	0	0	0
NC_022541	43880	TGCCGGCATC.ACGCGCCAGC	A	G	40	PASS	NA	GT	0	1	1	1	1	1	1	1	1	0	1	1	1	1	1	0	1	1	1	1	1	1	1	0	1	1	1	1	1	1	1	1	1	1	1	1	1	1	1	1	1
NC_022541	43886	CATCACGCGC.CAGCCCGCGC	C	G,A	40	PASS	NA	GT	0	1	2	2	2	2	2	0	0	0	2	0	0	2	0	0	2	0	0	2	2	2	0	0	2	2	2	0	0	0	0	0	0	2	2	2	2	0	0	0	0
NC_022541	43893	CGCCAGCCCG.CGCAAGAACG	C	T	40	PASS	NA	GT	0	0	0	0	0	0	0	0	0	0	0	0	0	0	0	0	0	0	0	0	0	0	0	0	0	0	0	0	0	0	0	0	0	0	0	0	0	0	0	0	0
NC_022541	43897	AGCCCGCGCA.AGAACGCATC	A	G	40	PASS	NA	GT	0	1	0	0	0	0	0	0	0	0	0	0	0	0	0	0	0	1	0	0	0	0	0	0	0	0	0	0	0	0	0	0	1	0	0	0	0	0	0	0	0
NC_022541	43901	CGCGCAAGAA.CGCATCGGGT	C	T	40	PASS	NA	GT	0	1	0	0	0	0	0	0	0	0	0	0	0	0	0	0	0	0	0	0	0	0	0	0	0	0	0	0	0	0	0	0	0	0	0	0	0	0	0	0	0
NC_022541	43916	CGGGTTTGCG.AATCAGCAGG	A	G	40	PASS	NA	GT	0	0	1	1	1	1	1	0	0	0	1	0	0	1	0	0	1	0	0	1	1	1	0	0	1	1	1	0	0	0	0	0	0	1	1	1	1	0	0	0	0
NC_022541	43940	AGCCATCGCC.GGTGAGCCCG	G	A	40	PASS	NA	GT	0	0	0	0	0	0	0	1	1	0	0	1	1	0	1	0	0	0	1	0	0	0	1	0	0	0	0	1	1	1	1	1	0	0	0	0	0	1	1	1	1
NC_022541	43946	CGCCGGTGAG.CCCGTCGGCG	C	T	40	PASS	NA	GT	0	0	1	1	1	1	1	0	0	0	1	0	0	1	0	0	1	0	0	1	1	1	0	0	1	1	1	0	0	0	0	0	0	1	1	1	1	0	0	0	0
NC_022541	43994	AGAGCGCCGC.AATCGCGGTA	A	G	40	PASS	NA	GT	0	0	0	0	0	0	0	0	0	0	0	0	0	0	0	0	0	0	0	0	0	0	0	0	0	0	0	0	0	0	0	0	0	0	0	0	0	0	0	0	0
NC_022541	43997	GCGCCGCAAT.CGCGGTATCC	C	T	40	PASS	NA	GT	0	0	1	1	1	1	1	0	0	0	1	0	0	1	0	0	1	0	0	1	1	1	0	0	1	1	1	0	0	0	0	0	0	1	1	1	1	0	0	0	0
NC_022541	44011	GTATCCACCA.GCGCGCGGGA	G	A	40	PASS	NA	GT	0	0	1	1	1	1	1	0	0	0	1	0	0	1	0	0	1	0	0	1	1	1	0	0	1	1	1	0	0	0	0	0	0	1	1	1	1	0	0	0	0
NC_022541	44012	TATCCACCAG.CGCGCGGGAA	C	T	40	PASS	NA	GT	0	0	0	0	0	0	0	0	0	0	0	0	0	0	0	0	0	0	0	0	0	0	0	0	0	0	0	0	0	0	0	0	0	0	0	0	0	0	0	0	0
NC_022541	44015	CCACCAGCGC.GCGGGAAGGT	G	A	40	PASS	NA	GT	0	0	0	0	0	0	0	0	0	0	0	0	0	0	0	0	0	0	0	0	0	0	0	0	0	0	0	0	0	0	0	0	0	0	0	0	0	0	0	0	0
NC_022541	44021	GCGCGCGGGA.AGGTTGGTCG	A	G	40	PASS	NA	GT	0	1	1	1	1	1	1	0	0	0	1	0	0	1	0	0	1	0	0	1	1	1	0	0	1	1	1	0	0	0	0	0	0	1	1	1	1	0	0	0	0
NC_022541	44035	TGGTCGTCCA.ACTGGGCGAC	A	G	40	PASS	NA	GT	0	0	1	1	1	1	1	0	0	0	1	0	0	1	0	0	1	0	0	1	1	1	0	0	1	1	1	0	0	0	0	0	0	1	1	1	1	0	0	0	0
NC_022541	44054	CCATGCCAAA.ACCACAGGCA	A	C	40	PASS	NA	GT	0	0	1	1	1	1	1	0	0	0	1	0	0	1	0	0	1	0	0	1	1	1	0	0	1	1	1	0	0	0	0	0	0	1	1	1	1	0	0	0	0
NC_022541	44060	CAAAACCACA.GGCATCGCGC	G	C	40	PASS	NA	GT	0	1	1	1	1	1	1	0	0	0	1	0	0	1	0	0	1	0	0	1	1	1	0	0	1	1	1	0	0	0	0	0	0	1	1	1	1	0	0	0	0
NC_022541	44063	AACCACAGGC.ATCGCGCTCG	A	G	40	PASS	NA	GT	0	1	1	1	1	1	1	1	1	0	1	1	1	1	1	0	1	1	1	1	1	1	1	0	1	1	1	1	1	1	1	1	1	1	1	1	1	1	1	1	1
NC_022541	44072	CATCGCGCTC.GTCGCGCACG	G	A	40	PASS	NA	GT	0	0	1	1	1	1	1	0	0	0	1	0	0	1	0	0	1	0	0	1	1	1	0	0	1	1	1	0	0	0	0	0	0	1	1	1	1	0	0	0	0
NC_022541	44080	TCGTCGCGCA.CGCTGTTGTA	C	T	40	PASS	NA	GT	0	0	0	0	0	0	0	0	0	0	0	0	0	0	0	0	0	0	0	0	0	0	0	0	0	0	0	0	0	0	0	0	0	0	0	0	0	0	0	0	0
NC_022541	44090	CGCTGTTGTA.AAGACCGTCG	A	G	40	PASS	NA	GT	0	1	1	1	1	1	1	1	1	0	1	1	1	1	1	0	1	1	1	1	1	1	1	0	1	1	1	1	1	1	1	1	1	1	1	1	1	1	1	1	1
NC_022541	44098	TAAAGACCGT.CGTCGTTGAG	C	A,G	40	PASS	NA	GT	0	1	1	1	1	1	1	0	0	0	1	0	0	1	0	0	1	0	0	1	1	1	0	0	1	1	1	0	0	0	0	0	0	1	1	1	1	0	0	0	0
NC_022541	44102	GACCGTCGTC.GTTGAGCCCT	G	A	40	PASS	NA	GT	0	0	0	0	0	0	0	0	0	0	0	0	0	0	0	0	0	0	0	0	0	0	0	0	0	0	0	0	0	0	0	0	0	0	0	0	0	0	0	0	0
NC_022541	44118	CCCTTGGCGA.GTGCGGGGGG	G	A	40	PASS	NA	GT	0	0	1	1	1	1	1	0	0	0	1	0	0	1	0	0	1	0	0	1	1	1	0	0	1	1	1	0	0	0	0	0	0	1	1	1	1	0	0	0	0
NC_022541	44153	TGCGATCTTA.GGAGAGCGGC	G	A	40	PASS	NA	GT	0	0	0	0	0	0	0	0	0	0	0	0	0	0	0	0	0	0	0	0	0	0	0	0	0	0	0	0	0	0	0	0	0	0	0	0	0	0	0	0	0
NC_022541	44164	GAGAGCGGCG.ACGACGTTGC	A	G	40	PASS	NA	GT	0	0	0	0	0	0	0	0	0	0	0	0	0	0	0	0	0	0	0	0	0	0	0	0	0	0	0	0	0	0	0	0	0	0	0	0	0	1	0	0	0
NC_022541	44171	GCGACGACGT.TGCAGCGCTC	T	C	40	PASS	NA	GT	0	1	0	0	0	0	0	0	0	0	0	0	0	0	0	0	0	0	0	0	0	0	0	0	0	0	0	0	0	0	0	0	0	0	0	0	0	0	0	0	0
NC_022541	44209	AGAGGTCACC.TGATGATCGA	T	G	40	PASS	NA	GT	0	1	1	1	1	1	1	1	1	1	1	1	1	1	1	1	1	1	1	1	1	1	1	0	1	1	1	1	1	1	1	1	1	1	1	1	1	1	1	1	1
NC_022541	44249	TGCCGCAATA.CACCGTTACA	C	T	40	PASS	NA	GT	0	0	0	0	0	0	0	1	1	0	0	0	0	0	1	0	0	0	1	0	0	0	1	0	0	0	0	1	1	1	1	1	0	0	0	0	0	1	1	1	1
NC_022541	44271	TGCAACGAGA.ACCACTGCAA	A	G	40	PASS	NA	GT	0	0	0	0	0	0	0	0	0	0	0	0	0	0	0	0	0	0	0	0	0	0	0	0	0	0	0	0	0	0	0	0	0	0	0	0	0	0	0	0	0
NC_022541	44272	GCAACGAGAA.CCACTGCAAT	C	A	40	PASS	NA	GT	0	0	0	0	0	0	0	1	1	0	0	1	1	0	1	0	0	1	1	0	0	0	1	0	0	0	0	1	1	1	1	1	1	0	0	0	0	1	1	1	1
NC_022541	44273	CAACGAGAAC.CACTGCAATC	C	G	40	PASS	NA	GT	0	0	0	0	0	0	0	0	0	0	0	0	0	0	0	0	0	0	0	0	0	0	0	0	0	0	0	0	0	0	0	0	0	0	0	0	0	0	0	0	0
NC_022541	44274	AACGAGAACC.ACTGCAATCC	A	G	40	PASS	NA	GT	0	1	1	1	1	1	1	0	0	0	1	0	0	1	0	0	1	0	0	1	1	1	0	0	1	1	1	0	0	0	0	0	0	1	1	1	1	0	0	0	0
NC_022541	44278	AGAACCACTG.CAATCCCTTG	C	A,T	40	PASS	NA	GT	0	0	0	0	0	0	0	0	0	0	0	0	0	0	0	0	0	0	0	0	0	0	0	0	0	0	0	0	0	0	0	0	0	0	0	0	0	0	0	0	0
NC_022541	44281	ACCACTGCAA.TCCCTTGTGC	T	C,G	40	PASS	NA	GT	0	1	2	2	2	2	2	0	0	0	2	0	0	2	0	0	2	0	0	2	2	2	0	0	2	2	2	0	0	0	0	0	0	2	2	2	2	0	0	0	0
NC_022541	44294	CTTGTGCCAG.CAGGCTTGGC	C	A	40	PASS	NA	GT	0	0	0	0	0	0	0	1	1	0	0	0	0	0	1	0	0	1	1	0	0	0	1	0	0	0	0	1	1	1	1	1	1	0	0	0	0	1	1	1	1
NC_022541	44304	CAGGCTTGGC.GCCGGTCTTG	G	A	40	PASS	NA	GT	0	0	0	0	0	0	0	0	0	0	0	0	0	0	0	0	0	0	0	0	0	0	0	0	0	0	0	0	0	0	0	0	0	0	0	0	0	0	0	0	0
NC_022541	44316	CGGTCTTGCG.ACAGGCGCCA	A	C	40	PASS	NA	GT	0	0	1	1	1	1	1	0	0	0	1	0	0	1	0	0	1	0	0	1	1	1	0	0	1	1	1	0	0	0	0	0	0	1	1	1	1	0	0	0	0
NC_022541	44318	GTCTTGCGAC.AGGCGCCAAC	A	C	40	PASS	NA	GT	0	0	1	1	1	1	1	0	0	0	1	0	0	1	0	0	1	0	0	1	1	1	0	0	1	1	1	0	0	0	0	0	0	1	1	1	1	0	0	0	0
NC_022541	44320	CTTGCGACAG.GCGCCAACGC	G	A	40	PASS	NA	GT	0	0	1	1	1	1	1	0	0	0	1	0	0	1	0	0	1	0	0	1	1	1	0	0	1	1	1	0	0	0	0	0	0	1	1	1	1	0	0	0	0
NC_022541	44327	CAGGCGCCAA.CGCCGTCTCA	C	G	40	PASS	NA	GT	0	1	0	0	0	0	0	0	0	0	0	0	0	0	0	0	0	0	0	0	0	0	0	0	0	0	0	0	0	0	0	0	0	0	0	0	0	0	0	0	0
NC_022541	44328	AGGCGCCAAC.GCCGTCTCAG	G	A	40	PASS	NA	GT	0	0	1	1	1	1	1	0	0	0	1	0	0	1	0	0	1	0	0	1	1	1	0	0	1	1	1	0	0	0	0	0	0	1	1	1	1	0	0	0	0
NC_022541	44333	CCAACGCCGT.CTCAGCCGCA	C	A	40	PASS	NA	GT	0	0	1	1	1	1	1	0	0	0	1	0	0	1	0	0	1	0	0	1	1	1	0	0	1	1	1	0	0	0	0	0	0	1	1	1	1	0	0	0	0
NC_022541	44350	GCAGCGCACC.GAGCTGATCA	G	A	40	PASS	NA	GT	0	0	0	0	0	0	0	0	0	0	0	0	0	0	0	0	0	0	0	0	0	0	0	0	0	0	0	0	0	0	0	0	0	0	0	0	0	0	0	0	0
NC_022541	44353	GCGCACCGAG.CTGATCACGT	C	G	40	PASS	NA	GT	0	1	1	1	1	1	1	0	0	0	1	0	0	1	0	0	1	0	0	1	1	1	0	0	1	1	1	0	0	0	0	0	0	1	1	1	1	0	0	0	0
NC_022541	44391	GATTGAGCCG.TTCGCCATTG	T	C	40	PASS	NA	GT	0	0	0	0	0	0	0	0	0	0	0	0	0	0	0	0	0	0	0	0	0	0	0	0	0	0	0	0	0	0	0	0	0	0	0	0	0	0	0	0	0
NC_022541	44394	TGAGCCGTTC.GCCATTGAAT	G	A	40	PASS	NA	GT	0	0	0	0	0	0	0	0	0	0	0	0	0	0	0	0	0	0	0	0	0	0	0	0	0	0	0	0	0	0	0	0	0	0	0	0	0	0	0	0	0
NC_022541	44397	GCCGTTCGCC.ATTGAATTCC	A	G	40	PASS	NA	GT	0	0	1	1	1	1	1	0	0	0	1	0	0	1	0	0	1	0	0	1	1	1	0	0	1	1	1	0	0	0	0	0	0	1	1	1	1	0	0	0	0
NC_022541	44421	TGGTCATCTG.GCCGGGTTTG	G	C	40	PASS	NA	GT	0	0	1	1	1	1	1	0	0	0	1	0	0	1	0	0	1	0	0	1	1	1	0	0	1	1	1	0	0	0	0	0	0	1	1	1	1	0	0	0	0
NC_022541	44427	TCTGGCCGGG.TTTGAGCACA	T	C	40	PASS	NA	GT	0	0	0	0	0	0	0	1	1	0	0	1	1	0	1	0	0	1	1	0	0	0	1	0	0	0	0	1	1	1	1	1	1	0	0	0	0	1	1	1	1
NC_022541	44433	CGGGTTTGAG.CACACGCACC	C	T	40	PASS	NA	GT	0	0	0	0	0	0	0	0	0	0	0	0	0	0	0	0	0	1	0	0	0	0	0	0	0	0	0	0	0	0	0	0	1	0	0	0	0	0	0	0	0
NC_022541	44438	TTGAGCACAC.GCACCGACTT	G	T	40	PASS	NA	GT	0	0	0	0	0	0	0	0	0	0	0	0	0	0	0	0	0	0	0	0	0	0	0	0	0	0	0	0	0	0	0	0	0	0	0	0	0	0	0	0	0
NC_022541	44439	TGAGCACACG.CACCGACTTG	C	T	40	PASS	NA	GT	0	0	1	1	1	1	1	0	0	0	1	0	0	1	0	0	1	0	0	1	1	1	0	0	1	1	1	0	0	0	0	0	0	1	1	1	1	0	0	0	0
NC_022541	44457	TGGCGCCGGC.ATCGCTGCGT	A	G	40	PASS	NA	GT	0	0	0	0	0	0	0	1	1	0	0	1	1	0	1	0	0	1	1	0	0	0	1	0	0	0	0	1	1	1	1	1	1	0	0	0	0	1	1	1	1
NC_022541	45301	TCGCCTTCGG.TACCGCGCTG	T	C	40	PASS	NA	GT	0	0	1	1	1	1	1	1	1	0	1	0	0	1	1	0	1	0	1	1	1	1	1	0	1	1	1	1	1	1	1	1	0	1	1	1	1	1	1	1	1
NC_022541	45304	CCTTCGGTAC.CGCGCTGCCC	C	T	40	PASS	NA	GT	0	1	1	1	1	1	1	0	0	0	1	0	0	1	0	0	1	0	0	1	1	1	0	0	1	1	1	0	0	0	0	0	0	1	1	1	1	0	0	0	0
NC_022541	45316	CGCTGCCCAA.ACTGCGGCGG	A	G	40	PASS	NA	GT	0	1	0	0	0	0	0	0	0	0	0	0	0	0	0	0	0	0	0	0	0	0	0	0	0	0	0	0	0	0	0	0	0	0	0	0	0	0	0	0	0
NC_022541	45317	GCTGCCCAAA.CTGCGGCGGC	C	T	40	PASS	NA	GT	0	1	0	0	0	0	0	0	0	0	0	0	0	0	0	0	0	0	0	0	0	0	0	0	0	0	0	0	0	0	0	0	0	0	0	0	0	0	0	0	0
NC_022541	45328	TGCGGCGGCG.GTTGCGTCGC	G	C	40	PASS	NA	GT	0	0	1	1	1	1	1	0	0	0	1	0	0	1	0	0	1	0	0	1	1	1	0	0	1	1	1	0	0	0	0	0	0	1	1	1	1	0	0	0	0
NC_022541	45344	TCGCGATCTG.CTGCTGCCGG	C	G	40	PASS	NA	GT	0	1	0	0	0	0	0	0	0	0	0	0	0	0	0	0	0	0	0	0	0	0	0	0	0	0	0	0	0	0	0	0	0	0	0	0	0	0	0	0	0
NC_022541	45350	TCTGCTGCTG.CCGGGATTTC	C	T	40	PASS	NA	GT	0	0	0	0	0	0	0	0	0	0	0	0	0	0	0	0	0	0	0	0	0	0	0	0	0	0	0	0	0	0	0	0	0	0	0	0	0	0	0	0	0
NC_022541	45355	TGCTGCCGGG.ATTTCCACGC	A	C	40	PASS	NA	GT	0	0	1	1	1	1	1	0	0	0	1	0	0	1	0	0	1	0	0	1	1	1	0	0	1	1	1	0	0	0	0	0	0	1	1	1	1	0	0	0	0
NC_022541	45358	TGCCGGGATT.TCCACGCGAA	T	C	40	PASS	NA	GT	0	1	1	1	1	1	1	0	0	0	1	0	0	1	0	0	1	0	0	1	1	1	0	0	1	1	1	0	0	0	0	0	0	1	1	1	1	0	0	0	0
NC_022541	45361	CGGGATTTCC.ACGCGAAAAG	A	T,G	40	PASS	NA	GT	0	0	1	1	1	1	1	0	0	0	1	0	0	1	0	0	1	0	0	1	1	1	0	0	1	1	1	0	0	0	0	0	0	1	1	1	1	0	0	0	0
NC_022541	45374	CGAAAAGGTG.CTGGCGATCG	C	T	40	PASS	NA	GT	0	0	0	0	0	0	0	1	1	0	0	0	0	0	1	0	0	0	1	0	0	0	1	0	0	0	0	1	1	1	1	1	0	0	0	0	0	1	1	1	1
NC_022541	45412	ACACCCTGGT.GCGCGTCGGC	G	A	40	PASS	NA	GT	0	1	0	0	0	0	0	0	0	0	0	0	0	0	0	0	0	0	0	0	0	0	0	0	0	0	0	0	0	0	0	0	0	0	0	0	0	0	0	0	0
NC_022541	45418	TGGTGCGCGT.CGGCAATGCC	C	G	40	PASS	NA	GT	0	0	1	1	1	1	1	0	0	0	1	0	0	1	0	0	1	0	0	1	1	1	0	0	1	1	1	0	0	0	0	0	0	1	1	1	1	0	0	0	0
NC_022541	45424	GCGTCGGCAA.TGCCGAATAC	T	C	40	PASS	NA	GT	0	0	1	1	1	1	1	0	0	0	1	0	0	1	0	0	1	0	0	1	1	1	0	0	1	1	1	0	0	0	0	0	0	1	1	1	1	0	0	0	0
NC_022541	45436	CCGAATACGC.ACGCAGCAAT	A	G	40	PASS	NA	GT	0	1	1	1	1	1	1	1	1	0	1	1	1	1	1	0	1	1	1	1	1	1	1	0	1	1	1	1	1	1	1	1	1	1	1	1	1	1	1	1	1
NC_022541	45448	GCAGCAATCG.CTCGTACGGA	C	T	40	PASS	NA	GT	0	0	0	0	0	0	0	1	1	0	0	1	1	0	1	0	0	0	1	0	0	0	1	0	0	0	0	1	1	1	1	1	0	0	0	0	0	1	1	1	1
NC_022541	45451	GCAATCGCTC.GTACGGACTG	G	C	40	PASS	NA	GT	0	0	1	1	1	1	1	0	0	0	1	0	0	1	0	0	1	0	0	1	1	1	0	0	1	1	1	0	0	0	0	0	0	1	1	1	1	0	0	0	0
NC_022541	45457	GCTCGTACGG.ACTGACCACG	A	G	40	PASS	NA	GT	0	1	1	1	1	1	1	0	0	0	1	0	0	1	0	0	1	0	0	1	1	1	0	0	1	1	1	0	0	0	0	0	0	1	1	1	1	0	0	0	0
NC_022541	45466	GACTGACCAC.GCTGCGCAAC	G	A,C	40	PASS	NA	GT	0	0	0	0	0	0	0	1	1	0	0	1	1	0	1	0	0	1	1	0	0	0	1	0	0	0	0	1	1	1	1	1	1	0	0	0	0	1	1	1	1
NC_022541	45481	GCAACCGGCA.TATGGAATTT	T	C	40	PASS	NA	GT	0	1	1	1	1	1	1	1	1	0	1	0	0	1	1	0	1	1	1	1	1	1	1	0	1	1	1	1	1	1	1	1	1	1	1	1	1	1	1	1	1
NC_022541	45491	TATGGAATTT.TTGAAAGGCG	T	C	40	PASS	NA	GT	0	1	1	1	1	1	1	1	1	0	1	1	1	1	1	0	1	1	1	1	1	1	1	0	1	1	1	1	1	1	1	1	1	1	1	1	1	1	1	1	1
NC_022541	45493	TGGAATTTTT.GAAAGGCGGA	G	C	40	PASS	NA	GT	0	0	1	1	1	1	1	0	0	0	1	0	0	1	0	0	1	0	0	1	1	1	0	0	1	1	1	0	0	0	0	0	0	1	1	1	1	0	0	0	0
NC_022541	45496	AATTTTTGAA.AGGCGGACGC	A	G	40	PASS	NA	GT	0	1	0	0	0	0	0	0	0	0	0	0	0	0	0	0	0	0	0	0	0	0	0	0	0	0	0	0	0	0	0	0	0	0	0	0	0	0	0	0	0
NC_022541	45502	TGAAAGGCGG.ACGCGCGCGG	A	C	40	PASS	NA	GT	0	0	0	0	0	0	0	0	0	0	0	0	0	0	0	0	0	0	0	0	0	0	0	0	0	0	0	0	0	0	0	0	0	0	0	0	0	0	0	0	0
NC_022541	45514	GCGCGCGGCT.GAAGTTCCGC	G	C	40	PASS	NA	GT	0	0	0	0	0	0	0	0	0	0	0	0	0	0	0	0	0	0	0	0	0	0	0	0	0	0	0	0	0	0	0	0	0	0	0	0	0	0	0	0	0
NC_022541	45517	CGCGGCTGAA.GTTCCGCGGC	G	A	40	PASS	NA	GT	0	1	0	0	0	0	0	0	0	0	0	0	0	0	0	0	0	0	0	0	0	0	0	0	0	0	0	0	0	0	0	0	0	0	0	0	0	0	0	0	0
NC_022541	45523	TGAAGTTCCG.CGGCAAGAGC	C	T	40	PASS	NA	GT	0	1	0	0	0	0	0	0	0	0	0	0	0	0	0	0	0	0	0	0	0	0	0	0	0	0	0	0	0	0	0	0	0	0	0	0	0	0	0	0	0
NC_022541	45568	ACGACAAGCA.GCTGGTCAAA	G	A	40	PASS	NA	GT	0	1	0	0	0	0	0	0	0	0	0	0	0	0	0	0	0	0	0	0	0	0	0	0	0	0	0	0	0	0	0	0	0	0	0	0	0	0	0	0	0
NC_022541	45569	CGACAAGCAG.CTGGTCAAAC	C	T	40	PASS	NA	GT	0	0	0	0	0	0	0	0	0	0	0	0	0	0	0	0	0	0	0	0	0	0	0	0	0	0	0	0	0	0	0	0	1	0	0	0	0	0	0	0	0
NC_022541	45575	GCAGCTGGTC.AAACTGATCC	A	G	40	PASS	NA	GT	0	0	0	0	0	0	0	0	0	0	0	0	0	0	0	0	0	0	0	0	0	0	0	0	0	0	0	0	0	0	0	0	0	0	0	0	0	0	0	0	0
NC_022541	45576	CAGCTGGTCA.AACTGATCCG	A	G	40	PASS	NA	GT	0	0	0	0	0	0	0	0	0	0	0	0	0	0	0	0	0	0	0	0	0	0	0	0	0	0	0	0	0	0	0	0	0	0	0	0	0	0	0	0	0
NC_022541	45580	TGGTCAAACT.GATCCGGCAA	G	C	40	PASS	NA	GT	0	0	1	1	1	1	1	0	0	0	1	0	0	1	0	0	1	0	0	1	1	1	0	0	1	1	1	0	0	0	0	0	0	1	1	1	1	0	0	0	0
NC_022541	45586	AACTGATCCG.GCAATGCCAG	G	C	40	PASS	NA	GT	0	0	1	1	1	1	1	0	0	0	1	0	0	1	0	0	1	0	0	1	1	1	0	0	1	1	1	0	0	0	0	0	0	1	1	1	1	0	0	0	0
NC_022541	45587	ACTGATCCGG.CAATGCCAGC	C	G	40	PASS	NA	GT	0	0	1	1	1	1	1	0	0	0	1	0	0	1	0	0	1	0	0	1	1	1	0	0	1	1	1	0	0	0	0	0	0	1	1	1	1	0	0	0	0
NC_022541	45599	ATGCCAGCAG.CTGCCGGGGC	C	T	40	PASS	NA	GT	0	0	0	0	0	0	0	0	0	0	0	0	0	0	0	0	0	0	0	0	0	0	0	0	0	0	0	0	0	0	0	0	0	0	0	0	0	0	0	0	0
NC_022541	45601	GCCAGCAGCT.GCCGGGGCAA	G	A	40	PASS	NA	GT	0	0	1	1	1	1	1	0	0	0	1	0	0	1	0	0	1	0	0	1	1	1	0	0	1	1	1	0	0	0	0	0	0	1	1	1	1	0	0	0	0
NC_022541	45604	AGCAGCTGCC.GGGGCAATCG	G	C	40	PASS	NA	GT	0	0	1	1	1	1	1	0	0	0	1	0	0	1	0	0	1	0	0	1	1	1	0	0	1	1	1	0	0	0	0	0	0	1	1	1	1	0	0	0	0
NC_022541	45607	AGCTGCCGGG.GCAATCGCTG	G	C	40	PASS	NA	GT	0	0	1	1	1	1	1	0	0	0	1	0	0	1	0	0	1	0	0	1	1	1	0	0	1	1	1	0	0	0	0	0	0	1	1	1	1	0	0	0	0
NC_022541	45610	TGCCGGGGCA.ATCGCTGTTC	A	G	40	PASS	NA	GT	0	1	0	0	0	0	0	0	0	0	0	0	0	0	0	0	0	0	0	0	0	0	0	0	0	0	0	0	0	0	0	0	0	0	0	0	0	0	0	0	0
NC_022541	45619	AATCGCTGTT.CCAGTACCGC	C	T	40	PASS	NA	GT	0	0	0	0	0	0	0	0	0	0	0	0	0	0	0	0	0	0	0	0	0	0	0	0	0	0	0	0	0	0	0	0	0	0	0	0	0	0	0	0	0
NC_022541	45625	TGTTCCAGTA.CCGCGACGAC	C	T	40	PASS	NA	GT	0	0	0	0	0	0	0	0	0	0	0	0	0	0	0	0	0	0	0	0	0	0	0	0	0	0	0	0	0	0	0	0	0	0	0	0	0	0	0	0	0
NC_022541	45631	AGTACCGCGA.CGACGATGGC	C	T	40	PASS	NA	GT	0	0	0	0	0	0	0	0	0	0	0	0	0	0	0	0	0	0	0	0	0	0	0	0	0	0	0	0	0	0	0	0	0	0	0	0	0	0	0	0	0
NC_022541	45637	GCGACGACGA.TGGCCAGTTG	T	C	40	PASS	NA	GT	0	0	0	0	0	0	0	0	0	0	0	0	0	0	0	0	0	0	0	0	0	0	0	0	0	0	0	0	0	0	0	0	0	0	0	0	0	0	0	0	0
NC_022541	45643	ACGATGGCCA.GTTGCAGCCG	G	A	40	PASS	NA	GT	0	1	0	0	0	0	0	0	0	0	0	0	0	0	0	0	0	0	0	0	0	0	0	0	0	0	0	0	0	0	0	0	0	0	0	0	0	0	0	0	0
NC_022541	45644	CGATGGCCAG.TTGCAGCCGG	T	C	40	PASS	NA	GT	0	0	1	1	1	1	1	0	0	0	1	0	0	1	0	0	1	0	0	1	1	1	0	0	1	1	1	0	0	0	0	0	0	1	1	1	1	0	0	0	0
NC_022541	45655	TGCAGCCGGT.GGATTCGGGT	G	C	40	PASS	NA	GT	0	0	0	0	0	0	0	0	0	0	0	0	0	0	0	0	0	0	0	0	0	0	0	0	0	0	0	0	0	0	0	0	0	0	0	0	0	0	0	0	0
NC_022541	45658	AGCCGGTGGA.TTCGGGTGAG	T	C	40	PASS	NA	GT	0	0	0	0	0	0	0	0	0	0	0	0	0	0	0	0	0	0	0	0	0	0	0	0	0	0	0	0	0	0	0	0	0	0	0	0	0	0	0	0	0
NC_022541	45664	TGGATTCGGG.TGAGGTCAAC	T	G,C	40	PASS	NA	GT	0	1	1	1	1	1	1	0	0	0	1	0	0	1	0	0	1	0	0	1	1	1	0	0	1	1	1	0	0	0	0	0	0	1	1	1	1	0	0	0	0
NC_022541	45665	GGATTCGGGT.GAGGTCAACG	G	C	40	PASS	NA	GT	0	1	0	0	0	0	0	0	0	0	0	0	0	0	0	0	0	0	0	0	0	0	0	0	0	0	0	0	0	0	0	0	0	0	0	0	0	0	0	0	0
NC_022541	45676	AGGTCAACGA.CTATCTACGC	C	T,G	40	PASS	NA	GT	0	0	1	1	1	1	1	0	0	0	1	0	0	1	0	0	1	0	0	1	1	1	0	0	1	1	1	0	0	0	0	0	0	1	1	1	1	0	0	0	0
NC_022541	45682	ACGACTATCT.ACGCGAGGCG	A	G	40	PASS	NA	GT	0	1	1	1	1	1	1	0	0	0	1	0	0	1	0	0	1	0	0	1	1	1	0	0	1	1	1	0	0	0	0	0	0	1	1	1	1	0	0	0	0
NC_022541	45691	TACGCGAGGC.GATGGGCGAA	G	C,A	40	PASS	NA	GT	0	1	0	0	0	0	0	0	0	0	0	0	0	0	0	0	0	0	0	0	0	0	0	0	0	0	0	0	0	0	0	0	0	0	0	0	0	0	0	0	0
NC_022541	45698	GGCGATGGGC.GAAGACTTCA	G	C	40	PASS	NA	GT	0	0	0	0	0	0	0	0	0	0	0	0	0	0	0	0	0	0	0	0	0	0	0	0	0	0	0	0	0	0	0	0	1	0	0	0	0	0	0	0	0
NC_022541	51229	CCGCCGGGCC.GTTCCAGGGA	G	A	40	LCB	NA	GT	0	0	0	0	0	0	0	0	0	0	0	0	0	0	0	0	0	0	0	0	0	0	0	0	0	0	0	0	0	0	0	0	0	0	0	0	0	0	0	0	0
NC_022541	51242	CCAGGGACAG.CAGTACGCGG	C	G	40	LCB	NA	GT	0	1	1	1	1	1	1	0	0	0	1	0	0	1	0	0	1	0	0	1	1	1	0	0	1	1	1	0	0	0	0	0	0	1	1	1	1	0	0	0	0
NC_022541	51252	CAGTACGCGG.CGGCCCGCTG	C	T	40	LCB	NA	GT	0	1	1	1	1	1	1	1	1	0	1	1	1	1	1	0	1	1	1	1	1	1	1	0	1	1	1	1	1	1	1	1	1	1	1	1	1	1	1	1	1
NC_022541	51253	AGTACGCGGC.GGCCCGCTGC	G	T	40	LCB	NA	GT	0	0	0	0	0	0	0	0	0	0	0	0	0	0	0	0	0	0	0	0	0	0	0	0	0	0	0	0	0	0	0	0	0	0	0	0	0	0	0	0	0
NC_022541	51262	CGGCCCGCTG.CTGCCTGCAG	C	T	40	LCB	NA	GT	0	0	0	0	0	0	0	0	0	0	0	0	0	0	0	0	0	0	0	0	0	0	0	0	0	0	0	0	0	0	0	0	0	0	0	0	0	0	0	0	0
NC_022541	52758	AGCTGCTCGG.CGGCAGCACG	C	T	40	LCB	NA	GT	0	0	0	0	0	0	0	0	0	0	0	0	0	0	0	0	0	0	0	0	0	0	0	0	0	0	0	0	0	0	0	0	0	0	0	0	0	0	0	0	0
NC_022541	52763	CTCGGCGGCA.GCACGGCGAA	G	A	40	LCB	NA	GT	0	0	1	1	1	1	1	0	0	0	1	0	0	1	0	0	1	0	0	1	1	1	0	0	1	1	1	0	0	0	0	0	0	1	1	1	1	0	0	0	0
NC_022541	52766	GGCGGCAGCA.CGGCGAACTT	C	G,A	40	LCB	NA	GT	0	0	1	1	1	1	1	0	0	0	1	0	0	2	0	0	1	0	0	1	1	1	0	0	1	1	2	0	0	0	0	0	0	1	1	2	1	0	0	0	0
NC_022541	52769	GGCAGCACGG.CGAACTTGTG	C	T	40	LCB	NA	GT	0	0	0	0	0	0	0	0	0	0	0	0	0	1	0	0	0	0	0	0	0	0	0	0	0	0	1	0	0	0	0	0	0	0	0	1	0	0	0	0	0
NC_022541	52773	GCACGGCGAA.CTTGTGGGCA	C	T	40	LCB	NA	GT	0	0	1	1	1	1	1	0	0	0	1	0	0	0	0	0	1	0	0	1	1	1	0	0	1	1	0	0	0	0	0	0	0	1	1	0	1	0	0	0	0
NC_022541	52776	CGGCGAACTT.GTGGGCAAAG	G	C	40	LCB	NA	GT	0	0	1	1	1	1	1	0	0	0	1	0	0	0	0	0	1	0	0	1	1	1	0	0	1	1	0	0	0	0	0	0	0	1	1	0	1	0	0	0	0
NC_022541	52779	CGAACTTGTG.GGCAAAGCGC	G	T	40	LCB	NA	GT	0	0	0	0	0	0	0	0	0	0	0	0	0	1	0	0	0	0	0	0	0	0	0	0	0	0	1	0	0	0	0	0	0	0	0	1	0	0	0	0	0
NC_022541	52788	GGGCAAAGCG.CTGCTCGGGG	C	T	40	LCB	NA	GT	0	0	0	0	0	0	0	0	0	0	0	0	0	0	0	0	0	0	0	0	0	0	0	0	0	0	0	0	0	0	0	0	0	0	0	0	0	0	0	0	0
NC_022541	52791	CAAAGCGCTG.CTCGGGGAAC	C	T	40	LCB	NA	GT	0	0	0	0	0	0	0	0	0	0	0	0	0	0	0	0	0	0	0	0	0	0	0	0	0	0	0	0	0	0	0	0	0	0	0	0	0	0	0	0	0
NC_022541	52797	GCTGCTCGGG.GAACTCGCGG	G	A	40	LCB	NA	GT	0	0	0	0	0	0	0	0	0	0	0	0	0	1	0	0	0	0	0	0	0	0	0	0	0	0	1	0	0	0	0	0	0	0	0	1	0	0	0	0	0
NC_022541	52800	GCTCGGGGAA.CTCGCGGTAG	C	T	40	LCB	NA	GT	0	1	0	0	0	0	0	1	1	0	0	1	1	0	1	0	0	1	1	0	0	0	1	0	0	0	0	1	1	1	1	1	1	0	0	0	0	1	1	1	1
NC_022541	52802	TCGGGGAACT.CGCGGTAGAT	C	G	40	LCB	NA	GT	0	1	1	1	1	1	1	1	1	0	1	1	1	1	1	0	1	1	1	1	1	1	1	0	1	1	1	1	1	1	1	1	1	1	1	1	1	1	1	1	1
NC_022541	52803	CGGGGAACTC.GCGGTAGATA	G	A	40	LCB	NA	GT	0	0	1	1	1	1	1	0	0	0	1	0	0	0	0	0	1	0	0	1	1	1	0	0	1	1	0	0	0	0	0	0	0	1	1	0	1	0	0	0	0
NC_022541	52806	GGAACTCGCG.GTAGATATTC	G	A	40	LCB	NA	GT	0	0	0	0	0	0	0	0	0	0	0	0	0	0	0	0	0	1	0	0	0	0	0	0	0	0	0	0	0	0	0	0	0	0	0	0	0	0	0	0	0
NC_022541	52812	CGCGGTAGAT.ATTCAGCACG	A	G	40	LCB	NA	GT	0	1	1	1	1	1	1	0	0	0	1	0	0	0	0	0	1	0	0	1	1	1	0	0	1	1	0	0	0	0	0	0	0	1	1	0	1	0	0	0	0
NC_022541	55882	AGGCCGCCGG.TTCCAGCGAG	T	G	40	LCB	NA	GT	0	0	0	0	0	0	0	1	1	0	0	1	1	0	1	0	0	1	1	0	0	0	1	0	0	0	0	1	1	1	1	1	1	0	0	0	0	1	1	1	1
NC_022541	55887	GCCGGTTCCA.GCGAGCGCCT	G	A	40	LCB	NA	GT	0	0	0	0	0	0	0	0	0	0	0	0	0	1	0	0	0	0	0	0	0	0	0	0	0	0	1	0	0	0	0	0	0	0	0	1	0	0	0	0	0
NC_022541	55898	CGAGCGCCTG.CTGCTGGATC	C	G	40	LCB	NA	GT	0	0	0	0	0	0	0	0	0	0	0	0	0	0	0	0	0	0	0	0	0	0	0	0	0	0	0	0	0	0	0	0	0	0	0	0	0	0	0	0	0
NC_022541	55919	GATCCGCAGG.GCAGGGCAAT	G	A	40	LCB	NA	GT	0	0	0	0	0	0	0	0	0	0	0	1	1	0	0	0	0	0	0	0	0	0	0	0	0	0	0	0	0	0	0	0	1	0	0	0	0	0	0	0	0
NC_022541	55920	ATCCGCAGGG.CAGGGCAATT	C	A	40	LCB	NA	GT	0	0	0	0	0	0	0	0	0	0	0	0	0	0	0	0	0	0	0	0	0	0	0	0	0	0	0	0	0	0	0	0	0	0	0	0	0	0	0	0	0
NC_022541	55921	TCCGCAGGGC.AGGGCAATTC	A	C	40	LCB	NA	GT	0	0	0	0	0	0	0	1	1	0	0	1	1	1	1	0	0	1	1	0	0	0	1	0	0	0	1	1	1	1	1	1	1	0	0	1	0	1	1	1	1
NC_022541	55923	CGCAGGGCAG.GGCAATTCGA	G	A	40	LCB	NA	GT	0	0	1	1	1	1	1	0	0	0	1	0	0	0	0	0	1	0	0	1	1	1	0	0	1	1	0	0	0	0	0	0	0	1	1	0	1	0	0	0	0
NC_022541	55927	GGGCAGGGCA.ATTCGAGCGG	A	G	40	LCB	NA	GT	0	0	0	0	0	0	0	1	1	0	0	1	1	1	1	0	0	1	1	0	0	0	1	0	0	0	1	1	1	1	1	1	1	0	0	1	0	1	1	1	1
NC_022541	55936	AATTCGAGCG.GGCGGATCTG	G	T	40	LCB	NA	GT	0	1	1	1	1	1	1	1	1	0	1	1	1	1	1	0	1	1	1	1	1	1	1	0	1	1	1	1	1	1	1	1	1	1	1	1	1	1	1	1	1
NC_022541	56374	TGGAGCTGGA.CCGGTTTGTC	C	T	40	PASS	NA	GT	0	0	0	0	0	0	0	0	0	0	0	0	0	1	0	0	0	0	0	0	0	0	0	0	0	0	1	0	0	0	0	0	0	0	0	1	0	0	0	0	0
NC_022541	56393	CGCCGATTGC.CTGCAGCTAC	C	T	40	PASS	NA	GT	0	0	0	0	0	0	0	0	0	0	0	0	0	0	0	0	0	0	0	0	0	0	0	0	0	0	0	0	0	0	0	0	0	0	0	0	0	0	0	0	0
NC_022541	56407	AGCTACCGGT.CTGGATGGAC	C	G	40	PASS	NA	GT	0	0	0	0	0	0	0	0	0	0	0	0	0	0	0	0	0	0	0	0	0	0	0	0	0	0	0	0	0	0	0	0	0	0	0	0	0	0	0	0	0
NC_022541	56413	CGGTCTGGAT.GGACAACGAC	G	A	40	PASS	NA	GT	0	0	0	0	0	0	0	0	0	0	0	0	0	0	0	0	0	0	0	0	0	0	0	0	0	0	0	0	0	0	0	0	0	0	0	0	0	0	0	0	0
NC_022541	56431	ACGCCCATTG.CGCCGCCCTG	C	T	40	PASS	NA	GT	0	0	0	0	0	0	0	0	0	0	0	0	0	0	0	0	0	0	0	0	0	0	0	0	0	0	0	0	0	0	0	0	0	0	0	0	0	0	0	0	0
NC_022541	56440	GCGCCGCCCT.GGCCGAAGCC	G	A	40	PASS	NA	GT	0	0	1	1	1	1	1	0	0	0	1	0	0	0	0	0	1	0	0	1	1	1	0	0	1	1	0	0	0	0	0	0	0	1	1	0	1	0	0	0	0
NC_022541	56446	CCCTGGCCGA.AGCCGTGTAC	A	G	40	PASS	NA	GT	0	1	1	1	1	1	1	1	1	0	1	1	1	1	1	0	1	1	1	1	1	1	1	0	1	1	1	1	1	1	1	1	1	1	1	1	1	1	1	1	1
NC_022541	56449	TGGCCGAAGC.CGTGTACGGC	C	G	40	PASS	NA	GT	0	0	0	0	0	0	0	0	0	0	0	0	0	0	0	0	0	0	0	0	0	0	0	0	0	0	0	0	0	0	0	0	0	0	0	0	0	0	0	0	0
NC_022541	56458	CCGTGTACGG.CATTGGCCGC	C	T	40	PASS	NA	GT	0	0	0	0	0	0	0	0	0	0	0	0	0	0	0	0	0	0	0	0	0	0	0	0	0	0	0	0	0	0	0	0	0	0	0	0	0	0	0	0	0
NC_022541	56473	GCCGCCAATC.GCCGGACCTG	G	A	40	PASS	NA	GT	0	0	0	0	0	0	0	0	0	0	0	0	0	0	0	0	0	0	0	0	0	0	0	0	0	0	0	0	0	0	0	0	0	0	0	0	0	0	0	0	0
NC_022541	56476	GCCAATCGCC.GGACCTGGTC	G	A	40	PASS	NA	GT	0	0	0	0	0	0	0	0	0	0	0	0	0	1	0	0	0	0	0	0	0	0	0	0	0	0	1	0	0	0	0	0	0	0	0	1	0	0	0	0	0
NC_022541	56479	AATCGCCGGA.CCTGGTCTAT	C	T	40	PASS	NA	GT	0	0	0	0	0	0	0	0	0	0	0	0	0	1	0	0	0	0	0	0	0	0	0	0	0	0	1	0	0	0	0	0	0	0	0	1	0	0	0	0	0
NC_022541	56485	CGGACCTGGT.CTATCTGTCG	C	G	40	PASS	NA	GT	0	1	0	0	0	0	0	0	0	0	0	0	0	0	0	0	0	0	0	0	0	0	0	0	0	0	0	0	0	0	0	0	0	0	0	0	0	0	0	0	0
NC_022541	56527	GCGTGATTGC.GGCCGGCAAC	G	T	40	PASS	NA	GT	0	0	1	1	1	1	1	1	1	0	1	1	1	1	1	0	1	1	1	1	1	1	1	0	1	1	1	1	1	1	1	1	1	1	1	1	1	1	1	1	1
NC_022541	56530	TGATTGCGGC.CGGCAACGTG	C	G	40	PASS	NA	GT	0	0	0	0	0	0	0	0	0	0	0	0	0	0	0	0	0	0	0	0	0	0	0	0	0	0	0	0	0	0	0	0	0	0	0	0	0	0	0	0	0
NC_022541	56536	CGGCCGGCAA.CGTGCGCCGC	C	G	40	PASS	NA	GT	0	0	0	0	0	0	0	0	0	0	0	0	0	1	0	0	0	0	0	0	0	0	0	0	0	0	1	0	0	0	0	0	0	0	0	1	0	0	0	0	0
NC_022541	56550	CGCCGCGGCG.CGCACGGCAA	C	A	40	PASS	NA	GT	0	0	0	0	0	0	0	0	0	0	0	0	0	0	0	0	0	0	0	0	0	0	0	0	0	0	0	0	0	0	0	0	0	0	0	0	0	0	0	0	0
NC_022541	56551	GCCGCGGCGC.GCACGGCAAT	G	A	40	PASS	NA	GT	0	0	1	1	1	1	1	0	0	0	1	0	0	1	0	0	1	0	0	1	1	1	0	0	1	1	1	0	0	0	0	0	0	1	1	1	1	0	0	0	0
NC_022541	56554	GCGGCGCGCA.CGGCAATGTG	C	T	40	PASS	NA	GT	0	0	0	0	0	0	0	0	0	0	0	0	0	1	0	0	0	0	0	0	0	0	0	0	0	0	1	0	0	0	0	0	0	0	0	1	0	0	0	0	0
NC_022541	56562	CACGGCAATG.TGGGCGAACT	T	G	40	PASS	NA	GT	0	0	1	1	1	1	1	0	0	0	1	0	0	0	0	0	1	0	0	1	1	1	0	0	1	1	0	0	0	0	0	0	0	1	1	0	1	0	0	0	0
NC_022541	56570	TGTGGGCGAA.CTGGGGCGCA	C	T	40	PASS	NA	GT	0	0	0	0	0	0	0	0	0	0	0	0	0	0	0	0	0	1	0	0	0	0	0	0	0	0	0	0	0	0	0	0	0	0	0	0	0	0	0	0	0
NC_022541	56581	TGGGGCGCAT.CTCGGCCATC	C	T	40	PASS	NA	GT	0	0	1	1	1	1	1	0	0	0	1	0	0	0	0	0	1	0	0	1	1	1	0	0	1	1	0	0	0	0	0	0	0	1	1	0	1	0	0	0	0
NC_022541	56602	CCGGCATGGC.GCGGCCGACC	G	C	40	PASS	NA	GT	0	0	0	0	0	0	0	0	0	0	0	0	0	0	0	0	0	0	0	0	0	0	0	0	0	0	0	0	0	0	0	0	0	0	0	0	0	0	0	0	0
NC_022541	56608	TGGCGCGGCC.GACCCTGGAA	G	A	40	PASS	NA	GT	0	1	0	0	0	0	0	1	1	0	0	1	1	1	1	0	0	1	1	0	0	0	1	0	0	0	1	1	1	1	1	1	1	0	0	1	0	1	1	1	1
NC_022541	56611	CGCGGCCGAC.CCTGGAAAGC	C	G,A	40	PASS	NA	GT	0	0	0	0	0	0	0	1	1	0	0	1	1	1	1	0	0	1	1	0	0	0	1	0	0	0	1	1	1	1	1	1	1	0	0	1	0	1	1	1	1
NC_022541	56633	GCGCCAGGCG.CTGGTCGCCG	C	T	40	PASS	NA	GT	0	0	0	0	0	0	0	0	0	0	0	0	0	0	0	0	0	0	0	0	0	0	0	0	0	0	0	0	0	0	0	0	0	0	0	0	0	0	0	0	0
NC_022541	56637	CAGGCGCTGG.TCGCCGATGG	T	C	40	PASS	NA	GT	0	1	0	0	0	0	0	0	0	0	0	0	0	1	0	0	0	0	0	0	0	0	0	0	0	0	1	0	0	0	0	0	0	0	0	1	0	0	0	0	0
NC_022541	56638	AGGCGCTGGT.CGCCGATGGC	C	T	40	PASS	NA	GT	0	0	0	0	0	0	0	0	0	0	0	0	0	1	0	0	0	0	0	0	0	0	0	0	0	0	1	0	0	0	0	0	0	0	0	1	0	0	0	0	0
NC_022541	56666	GCCGGACCTG.CACACCATGC	C	T	40	PASS	NA	GT	0	0	0	0	0	0	0	1	1	0	0	0	0	0	1	0	0	0	1	0	0	0	1	0	0	0	0	1	1	1	1	1	0	0	0	0	0	1	1	1	1
NC_022541	56677	ACACCATGCT.GCAGCACTAC	G	C	40	PASS	NA	GT	0	0	0	0	0	0	0	0	0	0	0	0	0	0	0	0	0	1	0	0	0	0	0	0	0	0	0	0	0	0	0	0	0	0	0	0	0	0	0	0	0
NC_022541	56683	TGCTGCAGCA.CTACGATGCG	C	T	40	PASS	NA	GT	0	0	0	0	0	0	0	1	1	0	0	1	1	0	1	0	0	1	1	0	0	0	1	0	0	0	0	1	1	1	1	1	1	0	0	0	0	1	1	1	1
NC_022541	56689	AGCACTACGA.TGCGGTGTGG	T	C	40	PASS	NA	GT	0	0	0	0	0	0	0	0	0	0	0	0	0	0	0	0	0	0	0	0	0	0	0	0	0	0	0	0	0	0	0	0	0	0	0	0	0	0	0	0	0
NC_022541	56694	TACGATGCGG.TGTGGCCGCA	T	C	40	PASS	NA	GT	0	1	1	1	1	1	1	1	1	1	1	1	1	1	1	1	1	1	1	1	1	1	1	0	1	1	1	1	1	1	1	1	1	1	1	1	1	1	1	1	1
NC_022541	56695	ACGATGCGGT.GTGGCCGCAG	G	C	40	PASS	NA	GT	0	0	0	0	0	0	0	0	0	0	0	0	0	0	0	0	0	0	0	0	0	0	0	0	0	0	0	0	0	0	0	0	0	0	0	0	0	0	0	0	0
NC_022541	56710	CGCAGATCGA.TGCGTGGCTG	T	C,G	40	PASS	NA	GT	0	0	0	0	0	0	0	1	1	0	0	1	1	1	1	0	0	1	1	0	0	0	1	0	0	0	1	1	1	1	1	1	1	0	0	1	0	1	1	1	1
NC_022541	56729	GGATGCAGTG.GAGCCGACCG	G	C	40	PASS	NA	GT	0	0	0	0	0	0	0	1	1	0	0	1	1	1	1	0	0	1	1	0	0	0	1	0	0	0	1	1	1	1	1	1	1	0	0	1	0	1	1	1	1
NC_022541	56731	ATGCAGTGGA.GCCGACCGTG	G	A	40	PASS	NA	GT	0	0	0	0	0	0	0	1	1	0	0	1	1	0	1	0	0	1	1	0	0	0	1	0	0	0	0	1	1	1	1	1	1	0	0	0	0	1	1	1	1
NC_022541	56737	TGGAGCCGAC.CGTGACCCTT	C	A	40	PASS	NA	GT	0	0	0	0	0	0	0	0	0	0	0	0	0	0	0	0	0	0	0	0	0	0	0	0	0	0	0	0	0	0	0	0	0	0	0	0	0	0	0	0	0
NC_022541	56743	CGACCGTGAC.CCTTGCGGTG	C	G,A	40	PASS	NA	GT	0	1	1	1	1	1	1	1	1	0	1	1	1	1	1	0	1	1	1	1	1	1	1	0	1	1	1	1	1	1	1	1	1	1	1	1	1	1	1	1	1
NC_022541	56750	GACCCTTGCG.GTGGCGGCGA	G	T	40	PASS	NA	GT	0	0	0	0	0	0	0	0	0	0	0	0	0	0	0	0	0	0	0	0	0	0	0	0	0	0	0	0	0	0	0	0	0	0	0	0	0	0	0	0	0
NC_022541	56783	CGATCCGCGT.GTGATTGTGT	G	C	40	PASS	NA	GT	0	0	0	0	0	0	0	0	0	0	0	1	1	0	0	0	0	0	0	0	0	0	0	0	0	0	0	0	0	0	0	0	1	0	0	0	0	0	0	0	0
NC_022541	56785	ATCCGCGTGT.GATTGTGTTT	G	C	40	PASS	NA	GT	0	0	0	0	0	0	0	0	0	0	0	0	0	0	0	0	0	0	0	0	0	0	0	0	0	0	0	0	0	0	0	0	0	0	0	0	0	0	0	0	0
NC_022541	56791	GTGTGATTGT.GTTTGGCGCG	G	T	40	PASS	NA	GT	0	1	0	0	0	0	0	1	1	0	0	1	1	0	1	0	0	1	1	0	0	0	1	0	0	0	0	1	1	1	1	1	1	0	0	0	0	1	1	1	1
NC_022541	56809	CGCGCCTGCC.AACCGATCTT	A	C	40	PASS	NA	GT	0	1	0	0	0	0	0	0	0	0	0	0	0	0	0	0	0	0	0	0	0	0	0	0	0	0	0	0	0	0	0	0	0	0	0	0	0	0	0	0	0
NC_022541	56833	AACGGCTGAT.CGCCCGCATC	C	T	40	PASS	NA	GT	0	0	0	0	0	0	0	0	0	0	0	0	0	0	0	0	0	0	0	0	0	0	0	0	0	0	0	0	0	0	0	0	0	0	0	0	0	0	0	0	0
NC_022541	56836	GGCTGATCGC.CCGCATCGCC	C	T	40	PASS	NA	GT	0	0	0	0	0	0	0	0	0	0	0	0	0	0	0	0	0	0	0	0	0	0	0	0	0	0	0	0	0	0	0	0	0	0	0	0	0	0	0	0	0
NC_022541	56845	CCCGCATCGC.CTTCGAACCT	C	T	40	PASS	NA	GT	0	0	1	1	1	1	1	0	0	0	1	0	0	0	0	0	1	0	0	1	1	1	0	0	1	1	0	0	0	0	0	0	0	1	1	0	1	0	0	0	0
NC_022541	56866	CGCCGCGGCG.TGGCGTCGCA	T	G,C	40	PASS	NA	GT	0	0	0	0	0	0	0	0	0	0	0	0	0	1	0	0	0	0	0	0	0	0	0	0	0	0	1	0	0	0	0	0	0	0	0	1	0	0	0	0	0
NC_022541	56872	GGCGTGGCGT.CGCATTGCCG	C	T	40	PASS	NA	GT	0	1	1	1	1	1	1	1	1	0	1	1	1	1	1	0	1	1	1	1	1	1	1	0	1	1	1	1	1	1	1	1	1	1	1	1	1	1	1	1	1
NC_022541	56887	TGCCGTATCC.CACGCTGCAA	C	G	40	PASS	NA	GT	0	0	0	0	0	0	0	1	1	0	0	1	1	1	1	0	0	1	1	0	0	0	1	0	0	0	1	1	1	1	1	1	1	0	0	1	0	1	1	1	1
NC_022541	56890	CGTATCCCAC.GCTGCAAGTC	G	C	40	PASS	NA	GT	0	0	0	0	0	0	0	1	1	0	0	1	1	1	1	0	0	1	1	0	0	0	1	0	0	0	1	1	1	1	1	1	1	0	0	1	0	1	1	1	1
NC_022541	56896	CCACGCTGCA.AGTCGGGCAG	A	G	40	PASS	NA	GT	0	1	1	1	1	1	1	1	1	0	1	1	1	1	1	0	1	1	1	1	1	1	1	0	1	1	1	1	1	1	1	1	1	1	1	1	1	1	1	1	1
NC_022541	56911	GGCAGGTGAC.GGCGCATGCC	G	C	40	PASS	NA	GT	0	0	0	0	0	0	0	0	0	0	0	0	0	0	0	0	0	0	0	0	0	0	0	0	0	0	0	0	0	0	0	0	0	0	0	0	0	0	0	0	0
NC_022541	56932	CCGTGCTGGG.CGCGGCCATG	C	T	40	PASS	NA	GT	0	0	0	0	0	0	0	0	0	0	0	1	1	0	0	0	0	0	0	0	0	0	0	0	0	0	0	0	0	0	0	0	1	0	0	0	0	0	0	0	0
NC_022541	61594	CCACCGTGGC.CGCATCGCCT	C	G	40	PASS	NA	GT	0	0	0	0	0	0	0	0	0	0	0	1	1	0	0	0	0	1	0	0	0	0	0	0	0	0	0	0	0	0	0	0	1	0	0	0	0	0	0	0	0
NC_022541	61595	CACCGTGGCC.GCATCGCCTT	G	T	40	PASS	NA	GT	0	0	0	0	0	0	0	0	0	0	0	1	1	0	0	0	0	1	0	0	0	0	0	0	0	0	0	0	0	0	0	0	1	0	0	0	0	0	0	0	0
NC_022541	61596	ACCGTGGCCG.CATCGCCTTC	C	G	40	PASS	NA	GT	0	0	0	0	0	0	0	0	0	0	0	1	1	0	0	0	0	1	0	0	0	0	0	0	0	0	0	0	0	0	0	0	1	0	0	0	0	0	0	0	0
NC_022541	61597	CCGTGGCCGC.ATCGCCTTCT	A	C	40	PASS	NA	GT	0	0	0	0	0	0	0	0	0	0	0	1	1	0	0	0	0	1	0	0	0	0	0	0	0	0	0	0	0	0	0	0	1	0	0	0	0	0	0	0	0
NC_022541	61603	CCGCATCGCC.TTCTTCCGCG	T	C	40	PASS	NA	GT	0	0	0	0	0	0	0	0	0	0	0	0	0	0	0	0	0	0	0	0	0	0	0	0	0	0	0	0	0	0	0	0	0	0	0	0	0	0	0	0	0
NC_022541	61610	GCCTTCTTCC.GCGCCGCGCA	G	A	40	PASS	NA	GT	0	1	1	1	1	1	1	1	1	0	1	1	1	1	1	0	1	1	1	1	1	1	1	0	1	1	1	1	1	1	1	1	1	1	1	1	1	1	1	1	1
NC_022541	61612	CTTCTTCCGC.GCCGCGCAGT	G	A	40	PASS	NA	GT	0	0	1	1	1	1	1	0	0	0	1	0	0	0	0	0	1	0	0	1	1	1	0	0	1	1	0	0	0	0	0	0	0	1	1	0	1	0	0	0	0
NC_022541	61621	CGCCGCGCAG.TTGCCCACGT	T	C	40	PASS	NA	GT	0	0	0	0	0	0	0	1	1	0	0	1	1	0	1	0	0	1	1	0	0	0	1	0	0	0	0	1	1	1	1	1	1	0	0	0	0	1	1	1	1
NC_022541	61626	CGCAGTTGCC.CACGTCCGGT	C	T	40	PASS	NA	GT	0	0	0	0	0	0	0	0	0	0	1	0	0	0	0	0	0	0	0	0	0	0	0	0	0	0	0	0	0	0	0	0	0	0	1	0	0	0	0	0	0
NC_022541	61627	GCAGTTGCCC.ACGTCCGGTC	A	G	40	PASS	NA	GT	0	0	0	0	0	0	0	1	1	0	0	1	1	0	1	0	0	1	1	0	0	0	1	0	0	0	0	1	1	1	1	1	1	0	0	0	0	1	1	1	1
NC_022541	61630	GTTGCCCACG.TCCGGTCTGG	T	C,G	40	PASS	NA	GT	0	1	1	1	1	1	1	1	1	0	1	2	2	1	1	0	1	1	1	1	1	1	1	0	1	1	1	1	1	1	1	1	1	1	1	1	1	1	1	1	1
NC_022541	61633	GCCCACGTCC.GGTCTGGTCG	G	T	40	PASS	NA	GT	0	0	0	0	0	0	0	0	0	0	0	0	0	0	0	0	0	0	0	0	0	0	0	0	0	0	0	0	0	0	0	0	0	0	0	0	0	0	0	0	0
NC_022541	61645	TCTGGTCGGC.CACCGCAAAC	C	T	40	PASS	NA	GT	0	0	0	0	0	0	0	1	1	0	0	1	1	0	1	0	0	1	1	0	0	0	1	0	0	0	0	1	1	1	1	1	1	0	0	0	0	1	1	1	1
NC_022541	61648	GGTCGGCCAC.CGCAAACCAG	C	T	40	PASS	NA	GT	0	1	0	0	0	0	0	0	0	0	0	0	0	0	0	0	0	0	0	0	0	0	0	0	0	0	0	0	0	0	0	0	0	0	0	0	0	0	0	0	0
NC_022541	61657	CCGCAAACCA.GGCGCCGTCG	G	C	40	PASS	NA	GT	0	0	1	1	1	1	1	1	1	0	1	1	1	1	1	0	1	1	1	1	1	1	1	0	1	1	1	1	1	1	1	1	1	1	1	1	1	1	1	1	1
NC_022541	61660	CAAACCAGGC.GCCGTCGCCA	G	A	40	PASS	NA	GT	0	1	0	0	0	0	0	0	0	0	0	0	0	0	0	0	0	0	0	0	0	0	0	0	0	0	0	0	0	0	0	0	0	0	0	0	0	0	0	0	0
NC_022541	61663	ACCAGGCGCC.GTCGCCATTG	G	A	40	PASS	NA	GT	0	0	1	1	1	1	1	1	1	0	1	1	1	1	1	0	1	1	1	1	1	1	1	0	1	1	1	1	1	1	1	1	1	1	1	1	1	1	1	1	1
NC_022541	61675	CGCCATTGCC.CACGGCCTTT	C	T	40	PASS	NA	GT	0	0	0	0	0	0	0	1	1	0	0	1	1	0	1	0	0	1	1	0	0	0	1	0	0	0	0	1	1	1	1	1	1	0	0	0	0	1	1	1	1
NC_022541	61676	GCCATTGCCC.ACGGCCTTTT	A	G	40	PASS	NA	GT	0	0	0	0	0	0	0	0	0	0	0	0	0	0	0	0	0	0	0	0	0	0	0	0	0	0	0	0	0	0	1	0	0	0	0	0	0	0	0	0	0
NC_022541	61678	CATTGCCCAC.GGCCTTTTGC	G	C	40	PASS	NA	GT	0	1	0	0	0	0	0	0	0	0	0	0	0	0	0	0	0	0	0	0	0	0	0	0	0	0	0	0	0	0	0	0	0	0	0	0	0	0	0	0	0
NC_022541	61684	CCACGGCCTT.TTGCAGATCG	T	C	40	PASS	NA	GT	0	0	0	0	0	0	0	0	0	0	0	0	0	0	0	0	0	0	0	0	0	0	0	0	0	0	0	0	0	0	0	0	0	0	0	0	0	0	0	0	0
NC_022541	61690	CCTTTTGCAG.ATCGCGCGCA	A	G	40	PASS	NA	GT	0	0	1	1	1	1	1	0	0	0	1	0	0	0	0	0	1	0	0	1	1	1	0	0	1	1	0	0	0	0	0	0	0	1	1	0	1	0	0	0	0
NC_022541	61693	TTTGCAGATC.GCGCGCATCG	G	A	40	PASS	NA	GT	0	0	1	1	1	1	1	0	0	0	1	0	0	0	0	0	1	0	0	1	1	1	0	0	1	1	0	0	0	0	0	0	0	1	1	0	1	0	0	0	0
NC_022541	61711	CGGCCATCAC.CGCCACCGTG	C	G	40	PASS	NA	GT	0	1	0	0	0	0	0	0	0	0	0	0	0	0	0	0	0	0	0	0	0	0	0	0	0	0	0	0	0	0	0	0	0	0	0	0	0	0	0	0	0
NC_022541	61714	CCATCACCGC.CACCGTGGCG	C	G	40	PASS	NA	GT	0	1	0	0	0	0	0	0	0	0	0	0	0	0	0	0	0	0	0	0	0	0	0	0	0	0	0	0	0	0	0	0	0	0	0	0	0	0	0	0	0
NC_022541	61723	CCACCGTGGC.GACCACGTGC	G	C	40	PASS	NA	GT	0	1	1	1	1	1	1	0	0	0	1	0	0	1	0	0	1	0	0	1	1	1	0	0	1	1	1	0	0	0	0	0	0	1	1	1	1	0	0	0	0
NC_022541	61734	ACCACGTGCA.GCGCGTAGGC	G	A	40	PASS	NA	GT	0	1	1	1	1	1	1	0	0	0	1	0	0	0	0	0	1	0	0	1	1	1	0	0	1	1	0	0	0	0	0	0	0	1	1	0	1	0	0	0	0
NC_022541	61735	CCACGTGCAG.CGCGTAGGCA	C	T	40	PASS	NA	GT	0	1	1	1	1	1	1	0	0	0	1	0	0	0	0	0	1	0	0	1	1	1	0	0	1	1	0	0	0	0	0	0	0	1	1	0	1	0	0	0	0
NC_022541	61738	CGTGCAGCGC.GTAGGCAGCA	G	A	40	PASS	NA	GT	0	1	0	0	0	0	0	0	0	0	0	0	0	0	0	0	0	0	0	0	0	0	0	0	0	0	0	0	0	0	0	0	0	0	0	0	0	0	0	0	0
NC_022541	61741	GCAGCGCGTA.GGCAGCACCG	G	C	40	PASS	NA	GT	0	0	0	0	0	0	0	0	0	0	0	0	0	0	0	0	0	0	0	0	0	0	0	0	0	0	0	0	0	0	0	0	0	0	0	0	0	0	0	0	0
NC_022541	61744	GCGCGTAGGC.AGCACCGAGG	A	C,G	40	PASS	NA	GT	0	0	1	1	1	1	1	0	0	0	1	0	0	1	0	0	1	0	0	1	1	1	0	0	1	1	1	0	0	0	0	0	0	1	1	1	1	0	0	0	0
NC_022541	61747	CGTAGGCAGC.ACCGAGGAAG	A	G	40	PASS	NA	GT	0	1	1	1	1	1	1	0	0	0	1	0	0	1	0	0	1	0	0	1	1	1	0	0	1	1	1	0	0	0	0	0	0	1	1	1	1	0	0	0	0
NC_022541	61750	AGGCAGCACC.GAGGAAGCCA	G	C	40	PASS	NA	GT	0	1	1	1	1	1	1	0	0	0	1	0	0	1	0	0	1	0	0	1	1	1	0	0	1	1	1	0	0	0	0	0	0	1	1	1	1	0	0	0	0
NC_022541	61752	GCAGCACCGA.GGAAGCCATC	G	A	40	PASS	NA	GT	0	0	0	0	0	0	0	0	0	0	0	0	0	0	0	0	0	0	0	0	0	0	0	0	0	0	0	0	0	0	0	0	0	0	0	0	0	0	0	0	0
NC_022541	61753	CAGCACCGAG.GAAGCCATCC	G	A	40	PASS	NA	GT	0	1	0	0	0	0	0	0	0	0	0	0	0	0	0	0	0	0	0	0	0	0	0	0	0	0	0	0	0	0	0	0	0	0	0	0	0	0	0	0	0
NC_022541	61756	CACCGAGGAA.GCCATCCAGC	G	T	40	PASS	NA	GT	0	1	0	0	0	0	0	0	0	0	0	0	0	0	0	0	0	0	0	0	0	0	0	0	0	0	0	0	0	0	0	0	0	0	0	0	0	0	0	0	0
NC_022541	61764	AAGCCATCCA.GCGCATCCTG	G	A	40	PASS	NA	GT	0	0	0	0	0	0	0	0	0	0	0	0	0	1	0	0	0	0	0	0	0	0	0	0	0	0	1	0	0	0	0	0	0	0	0	1	0	0	0	0	0
NC_022541	61765	AGCCATCCAG.CGCATCCTGC	C	T	40	PASS	NA	GT	0	0	0	0	0	0	0	0	0	0	0	0	0	0	0	0	0	0	0	0	0	0	0	0	0	0	0	0	0	0	0	0	0	0	0	0	0	0	0	0	0
NC_022541	61780	CCTGCTTGGA.CGCAAAGGCC	C	T	40	PASS	NA	GT	0	1	1	1	1	1	1	0	0	0	1	0	0	0	0	0	1	0	0	1	1	1	0	0	1	1	0	0	0	0	0	0	0	1	1	0	1	0	0	0	0
NC_022541	61782	TGCTTGGACG.CAAAGGCCTT	C	T	40	PASS	NA	GT	0	0	0	0	0	0	0	0	0	0	0	0	0	0	0	0	0	0	0	0	0	0	0	0	0	0	0	0	0	0	0	0	0	0	0	0	0	0	0	0	0
NC_022541	61783	GCTTGGACGC.AAAGGCCTTG	A	G	40	PASS	NA	GT	0	0	1	1	1	1	1	0	0	0	1	0	0	0	0	0	1	0	0	1	1	1	0	0	1	1	0	0	0	0	0	0	0	1	1	0	1	0	0	0	0
NC_022541	61786	TGGACGCAAA.GGCCTTGCCC	G	C	40	PASS	NA	GT	0	0	1	1	1	1	1	0	0	0	1	0	0	0	0	0	1	0	0	1	1	1	0	0	1	1	0	0	0	0	0	0	0	1	1	0	1	0	0	0	0
NC_022541	61789	ACGCAAAGGC.CTTGCCCAAG	C	T	40	PASS	NA	GT	0	1	0	0	0	0	0	0	0	0	0	0	0	0	0	0	0	0	0	0	0	0	0	0	0	0	0	0	0	0	0	0	0	0	0	0	0	0	0	0	0
NC_022541	61792	CAAAGGCCTT.GCCCAAGGTC	G	A	40	PASS	NA	GT	0	0	0	0	0	0	0	0	0	0	0	1	1	0	0	0	0	0	0	0	0	0	0	0	0	0	0	0	0	0	0	0	0	0	0	0	0	0	0	0	0
NC_022541	61797	GCCTTGCCCA.AGGTCGCCTG	A	G	40	PASS	NA	GT	0	1	1	1	1	1	1	1	1	0	1	1	1	1	1	0	1	1	1	1	1	1	1	0	1	1	1	1	1	1	1	1	1	1	1	1	1	1	1	1	1
NC_022541	61798	CCTTGCCCAA.GGTCGCCTGC	G	C	40	PASS	NA	GT	0	1	0	0	0	0	0	0	0	0	0	0	0	1	0	0	0	0	0	0	0	0	0	0	0	0	1	0	0	0	0	0	0	0	0	1	0	0	0	0	0
NC_022541	61801	TGCCCAAGGT.CGCCTGCGGC	C	G	40	PASS	NA	GT	0	1	0	0	0	0	0	0	0	0	0	0	0	1	0	0	0	0	0	0	0	0	0	0	0	0	1	0	0	0	0	0	0	0	0	1	0	0	0	0	0
NC_022541	61803	CCCAAGGTCG.CCTGCGGCAA	C	T	40	PASS	NA	GT	0	0	0	0	0	0	0	0	0	0	0	0	0	0	0	0	0	1	0	0	0	0	0	0	0	0	0	0	0	0	0	0	0	0	0	0	0	0	0	0	0
NC_022541	61822	ACTGCCACCA.CACCGCGGTG	C	T	40	PASS	NA	GT	0	0	0	0	0	0	0	1	1	0	0	1	1	0	1	0	0	1	1	0	0	0	1	0	0	0	0	1	1	1	1	1	1	0	0	0	0	1	1	1	1
NC_022541	61825	GCCACCACAC.CGCGGTGGTG	C	T	40	PASS	NA	GT	0	0	0	0	0	0	0	0	0	0	0	0	0	0	0	0	0	0	0	0	0	0	0	0	0	0	0	0	0	0	0	0	0	0	0	0	0	0	0	0	0
NC_022541	61834	CCGCGGTGGT.GTGCAATTCC	G	A	40	PASS	NA	GT	0	0	0	0	0	0	0	0	0	0	0	1	1	0	0	0	0	0	0	0	0	0	0	0	0	0	0	0	0	0	0	0	0	0	0	0	0	0	0	0	0
NC_022541	61839	GTGGTGTGCA.ATTCCTGGTC	A	G	40	PASS	NA	GT	0	0	1	1	1	1	1	0	0	0	1	0	0	1	0	0	1	0	0	1	1	1	0	0	1	1	1	0	0	0	0	0	0	1	1	1	1	0	0	0	0
NC_022541	61855	GGTCGGGCAG.GTTCACCGGC	G	A	40	PASS	NA	GT	0	1	0	0	0	0	0	1	1	0	0	1	1	0	1	0	0	1	1	0	0	0	1	0	0	0	0	1	1	1	1	1	1	0	0	0	0	1	1	1	1
NC_022541	61856	GTCGGGCAGG.TTCACCGGCC	T	G	40	PASS	NA	GT	0	0	0	0	0	0	0	0	0	0	0	0	0	0	0	0	0	0	0	0	0	0	0	0	0	0	0	0	0	0	0	0	0	0	0	0	0	0	0	0	0
NC_022541	61864	GGTTCACCGG.CCCGTAACCG	C	G	40	PASS	NA	GT	0	0	1	1	1	1	1	0	0	0	1	0	0	1	0	0	1	0	0	1	1	1	0	0	1	1	1	0	0	0	0	0	0	1	1	1	1	0	0	0	0
NC_022541	61870	CCGGCCCGTA.ACCGATGTTT	A	G	40	PASS	NA	GT	0	1	1	1	1	1	1	1	1	0	1	1	1	1	1	0	1	1	1	1	1	1	1	0	1	1	1	1	1	1	1	1	1	1	1	1	1	1	1	1	1
NC_022541	61879	AACCGATGTT.TTCATGCGTG	T	C	40	PASS	NA	GT	0	0	1	1	1	1	1	0	0	0	1	0	0	1	0	0	1	0	0	1	1	1	0	0	1	1	1	0	0	0	0	0	0	1	1	1	1	0	0	0	0
NC_022541	61882	CGATGTTTTC.ATGCGTGTAG	A	G	40	PASS	NA	GT	0	1	1	1	1	1	1	1	1	0	1	1	1	1	1	0	1	1	1	1	1	1	1	0	1	1	1	1	1	1	1	1	1	1	1	1	1	1	1	1	1
NC_022541	61906	GGATCTTCTT.GTAGCCGGAC	G	A	40	PASS	NA	GT	0	1	0	0	0	0	0	0	0	0	0	0	0	0	0	0	0	0	0	0	0	0	0	0	0	0	0	0	0	0	0	0	0	0	0	0	0	0	0	0	0
NC_022541	61917	TAGCCGGACA.CGCGCCGCAC	C	A	40	PASS	NA	GT	0	0	0	0	0	0	0	0	0	0	0	0	0	0	0	0	0	0	0	0	0	0	0	0	0	0	0	0	0	0	0	0	0	0	0	0	0	0	0	0	0
NC_022541	61930	GCCGCACCAC.ATGCACTTCG	A	G	40	PASS	NA	GT	0	1	0	0	0	0	0	0	0	0	0	0	0	0	0	0	0	0	0	0	0	0	0	0	0	0	0	0	0	0	0	0	0	0	0	0	0	0	0	0	0
NC_022541	61936	CCACATGCAC.TTCGCCATGG	T	C	40	PASS	NA	GT	0	0	1	1	1	1	1	0	0	0	1	0	0	1	0	0	1	0	0	1	1	1	0	0	1	1	1	0	0	0	0	0	0	1	1	1	1	0	0	0	0
NC_022541	61942	GCACTTCGCC.ATGGTGCGAG	A	G	40	PASS	NA	GT	0	1	0	0	0	0	0	1	1	0	0	1	1	0	1	0	0	1	1	0	0	0	1	0	0	0	0	1	1	1	1	1	1	0	0	0	0	1	1	1	1
NC_022541	61948	CGCCATGGTG.CGAGTCGCCA	C	G	40	PASS	NA	GT	0	1	1	1	1	1	1	0	0	0	1	0	0	1	0	0	1	0	0	1	1	1	0	0	1	1	1	0	0	0	0	0	0	1	1	1	1	0	0	0	0
NC_022541	61949	GCCATGGTGC.GAGTCGCCAC	G	C	40	PASS	NA	GT	0	1	1	1	1	1	1	0	0	0	1	0	0	1	0	0	1	0	0	1	1	1	0	0	1	1	1	0	0	0	0	0	0	1	1	1	1	0	0	0	0
NC_022541	61950	CCATGGTGCG.AGTCGCCACG	A	C	40	PASS	NA	GT	0	0	0	0	0	0	0	0	0	0	0	0	0	0	0	0	0	0	0	0	0	0	0	0	0	0	0	0	0	0	0	0	0	0	0	0	0	0	0	0	0
NC_022541	61951	CATGGTGCGA.GTCGCCACGG	G	A	40	PASS	NA	GT	0	1	1	1	1	1	1	0	0	0	1	0	0	1	0	0	1	0	0	1	1	1	0	0	1	1	1	0	0	0	0	0	0	1	1	1	1	0	0	0	0
NC_022541	61960	AGTCGCCACG.GCCGGCCACG	G	C	40	PASS	NA	GT	0	0	0	0	0	0	0	0	0	0	0	0	0	0	0	0	0	0	0	0	0	0	0	0	0	0	0	0	0	0	0	0	0	0	0	0	0	0	0	0	0
NC_022541	61969	GGCCGGCCAC.GCCGCCGTCG	G	A	40	PASS	NA	GT	0	0	1	1	1	1	1	0	0	0	1	0	0	1	0	0	1	0	0	1	1	1	0	0	1	1	1	0	0	0	0	0	0	1	1	1	1	0	0	0	0
NC_022541	61975	CCACGCCGCC.GTCGAAGCGG	G	A	40	PASS	NA	GT	0	0	1	1	1	1	1	0	0	0	1	0	0	1	0	0	1	0	0	1	1	1	0	0	1	1	1	0	0	0	0	0	0	1	1	1	1	0	0	0	0
NC_022541	61984	CGTCGAAGCG.GTCCAGCACC	G	A	40	PASS	NA	GT	0	0	1	1	1	1	1	0	0	0	1	0	0	1	0	0	1	0	0	1	1	1	0	0	1	1	1	0	0	0	0	0	0	1	1	1	1	0	0	0	0
NC_022541	61996	CCAGCACCTT.GAGCTTGGTG	G	C	40	PASS	NA	GT	0	1	1	1	1	1	1	1	1	0	1	1	1	1	1	0	1	1	1	1	1	1	1	0	1	1	1	1	1	1	1	1	1	1	1	1	1	1	1	1	1
NC_022541	61998	AGCACCTTGA.GCTTGGTGTA	G	A	40	PASS	NA	GT	0	1	0	0	0	0	0	1	1	0	0	1	1	0	1	0	0	1	1	0	0	0	1	0	0	0	0	1	1	1	1	1	1	0	0	0	0	1	1	1	1
NC_022541	62009	CTTGGTGTAG.TCGATGCTGT	T	C	40	PASS	NA	GT	0	0	1	1	1	1	1	0	0	0	1	0	0	0	0	0	1	0	0	1	1	1	0	0	1	1	0	0	0	0	0	0	0	1	1	0	1	0	0	0	0
NC_022541	62017	AGTCGATGCT.GTCGGTGTAG	G	A	40	PASS	NA	GT	0	0	0	0	0	0	0	0	0	0	0	0	0	0	0	0	0	1	0	0	0	0	0	0	0	0	0	0	0	0	0	0	1	0	0	0	0	0	0	0	0
NC_022541	62036	GTAGTCCACA.TGCGTGCGCG	T	C	40	PASS	NA	GT	0	0	0	0	0	0	0	0	0	0	0	0	0	0	0	0	0	0	0	0	0	0	0	0	0	0	0	0	0	0	0	0	0	0	0	0	0	0	0	0	0
NC_022541	62050	TGCGCGTCAC.ATACGCCTTG	A	G	40	PASS	NA	GT	0	1	1	1	1	1	1	1	1	0	1	1	1	1	1	0	1	1	1	1	1	1	1	0	1	1	1	1	1	1	1	1	1	1	1	1	1	1	1	1	1
NC_022541	62071	GGCCTTCCCA.GTCCAGTCGC	G	A	40	PASS	NA	GT	0	1	1	1	1	1	1	0	0	0	1	0	0	1	0	0	1	0	0	1	1	1	0	0	1	1	1	0	0	0	0	0	0	1	1	1	1	0	0	0	0
NC_022541	62074	CTTCCCAGTC.CAGTCGCTCC	C	A	40	PASS	NA	GT	0	0	0	0	0	0	0	0	0	0	0	0	0	0	0	0	0	0	0	0	0	0	0	0	0	0	0	0	0	0	0	0	0	0	0	0	0	0	0	0	0
NC_022541	62077	CCCAGTCCAG.TCGCTCCACC	T	C	40	PASS	NA	GT	0	1	1	1	1	1	1	1	1	0	1	1	1	1	1	0	1	1	1	1	1	1	1	0	1	1	1	1	1	1	1	1	1	1	1	1	1	1	1	1	1
NC_022541	62086	GTCGCTCCAC.CTGGTACGAC	C	T	40	PASS	NA	GT	0	0	0	0	0	0	0	0	0	0	0	0	0	0	0	0	0	1	0	0	0	0	0	0	0	0	0	0	0	0	0	0	0	0	0	0	0	0	0	0	0
NC_022541	62092	CCACCTGGTA.CGACGTGCTC	C	G	40	PASS	NA	GT	0	1	1	1	1	1	1	0	0	0	1	0	0	1	0	0	1	0	0	1	1	1	0	0	1	1	1	0	0	0	0	0	0	1	1	1	1	0	0	0	0
NC_022541	62094	ACCTGGTACG.ACGTGCTCTG	A	G	40	PASS	NA	GT	0	1	1	1	1	1	1	1	1	0	1	1	1	1	1	0	1	1	1	1	1	1	1	0	1	1	1	1	1	1	1	1	1	1	1	1	1	1	1	1	1
NC_022541	62107	TGCTCTGCAC.AATGTGGATG	A	C	40	PASS	NA	GT	0	1	1	1	1	1	1	1	1	0	1	1	1	1	1	0	1	1	1	1	1	1	1	0	1	1	1	1	1	1	1	1	1	1	1	1	1	1	1	1	1
NC_022541	62131	CTTCGTACAA.GGTGAGCGCA	G	T	40	PASS	NA	GT	0	0	0	0	0	0	0	0	0	0	0	0	0	0	0	0	0	0	0	0	0	0	0	0	0	0	0	0	0	0	0	0	0	0	0	0	0	0	0	0	0
NC_022541	62134	CGTACAAGGT.GAGCGCAGCG	G	A	40	PASS	NA	GT	0	0	0	0	0	0	0	0	0	0	0	0	0	0	0	0	0	0	0	0	0	0	0	0	0	0	0	0	0	0	0	0	0	0	0	0	0	0	0	0	0
NC_022541	62137	ACAAGGTGAG.CGCAGCGGCC	C	T	40	PASS	NA	GT	0	1	0	0	0	0	0	0	0	0	0	0	0	0	0	0	0	0	0	0	0	0	0	0	0	0	0	0	0	0	0	0	0	0	0	0	0	0	0	0	0
NC_022541	62143	TGAGCGCAGC.GGCCGAATAA	G	A	40	PASS	NA	GT	0	0	0	0	0	0	0	0	0	0	0	0	0	0	0	0	0	0	0	0	0	0	0	0	0	0	0	0	0	0	0	0	0	0	0	0	0	0	0	0	0
NC_022541	62158	AATAATCCAC.CTCGGCGATG	C	T	40	PASS	NA	GT	0	0	0	0	0	0	0	0	0	0	0	0	0	0	0	0	0	0	0	0	0	0	0	0	0	0	0	0	0	0	0	0	0	0	0	0	0	0	0	0	0
NC_022541	62176	TGATCTGCTG.CTTGCCGTCG	C	T	40	PASS	NA	GT	0	0	0	0	0	0	0	0	0	0	0	0	0	1	0	0	0	0	0	0	0	0	0	0	0	0	1	0	0	0	0	0	0	0	0	1	0	0	0	0	0
NC_022541	62182	GCTGCTTGCC.GTCGCTCTTG	G	A	40	PASS	NA	GT	0	0	0	0	0	0	0	0	0	0	0	0	0	0	0	0	0	0	0	0	0	0	0	0	0	0	0	0	0	0	0	0	0	0	0	0	0	0	0	0	0
NC_022541	62203	CCACCACCAC.GAAGTTGCCA	G	A	40	PASS	NA	GT	0	0	0	0	0	0	0	0	0	0	0	0	0	0	0	0	0	0	0	0	0	0	0	0	0	0	0	0	0	0	0	0	0	0	0	0	0	0	0	0	0
NC_022541	62206	CCACCACGAA.GTTGCCATCG	G	A	40	PASS	NA	GT	0	0	0	0	0	0	0	1	1	0	0	1	1	0	1	0	0	1	1	0	0	0	1	0	0	0	0	1	1	1	1	1	1	0	0	0	0	1	1	1	1
NC_022541	62212	CGAAGTTGCC.ATCGGCCACC	A	G	40	PASS	NA	GT	0	0	0	0	0	0	0	1	1	0	0	1	1	0	1	0	0	1	1	0	0	0	1	0	0	0	0	1	1	1	1	1	1	0	0	0	0	1	1	1	1
NC_022541	62230	CCGAGCGCAG.GCTCACCGCA	G	A	40	PASS	NA	GT	0	0	0	0	0	0	0	0	0	0	0	0	0	0	0	0	0	0	0	0	0	0	0	0	0	0	0	0	0	0	0	0	0	0	0	0	0	0	0	0	0
NC_022541	62931	GGGTTCCACA.ACAGCACATG	A	G	40	PASS	NA	GT	0	0	1	1	1	1	1	0	0	0	1	0	0	0	0	0	1	0	0	1	1	1	0	0	1	1	0	0	0	0	0	0	0	1	1	0	1	0	0	0	0
NC_022541	62938	ACAACAGCAC.ATGCTTGTCG	A	G	40	PASS	NA	GT	0	0	1	1	1	1	1	0	0	0	1	0	0	0	0	0	1	0	0	1	1	1	0	0	1	1	0	0	0	0	0	0	0	1	1	0	1	0	0	0	0
NC_022541	62959	CGGTGGGCGC.GCCGGATTCG	G	A	40	PASS	NA	GT	0	0	0	0	0	0	0	0	0	0	0	0	0	1	0	0	0	0	0	0	0	0	0	0	0	0	1	0	0	0	0	0	0	0	0	1	0	0	0	0	0
NC_022541	62962	TGGGCGCGCC.GGATTCGGTG	G	C	40	PASS	NA	GT	0	1	0	0	0	0	0	1	1	0	0	0	0	0	1	0	0	0	1	0	0	0	1	0	0	0	0	1	1	1	1	1	0	0	0	0	0	1	1	1	1
NC_022541	62974	ATTCGGTGAT.GGCATGCACC	G	C	40	PASS	NA	GT	0	0	1	1	1	1	1	0	0	0	1	0	0	0	0	0	1	0	0	1	1	1	0	0	1	1	0	0	0	0	0	0	0	1	1	0	1	0	0	0	0
NC_022541	62975	TTCGGTGATG.GCATGCACCT	G	C	40	PASS	NA	GT	0	0	0	0	0	0	0	1	1	0	0	0	0	0	1	0	0	0	1	0	0	0	1	0	0	0	0	1	1	1	1	1	1	0	0	0	0	1	1	1	1
NC_022541	62983	TGGCATGCAC.CTGCTCTTCG	C	T	40	PASS	NA	GT	0	0	0	0	0	0	0	0	0	0	0	0	0	0	0	0	0	0	0	0	0	0	0	0	0	0	0	0	0	0	0	0	0	0	0	0	0	0	0	0	0
NC_022541	62997	TCTTCGATCA.AGGCCTGCGC	A	G	40	PASS	NA	GT	0	0	1	1	1	1	1	0	0	0	1	0	0	0	0	0	1	0	0	1	1	1	0	0	1	1	0	0	0	0	0	0	0	1	1	0	1	0	0	0	0
NC_022541	63001	CGATCAAGGC.CTGCGCGTGC	C	T	40	PASS	NA	GT	0	0	0	0	0	0	0	0	0	0	0	0	0	0	0	0	0	0	0	0	0	0	0	0	0	0	0	0	0	0	0	0	0	0	0	0	0	0	0	0	0
NC_022541	63013	GCGCGTGCGC.ATGCGGGTTG	A	G	40	PASS	NA	GT	0	0	0	0	0	0	0	0	0	0	0	0	0	0	0	0	0	0	0	0	0	0	0	0	0	0	0	0	0	0	0	0	0	0	0	0	0	0	0	0	0
NC_022541	63049	ACAGGATGAA.TTGCGGCGTG	T	C	40	PASS	NA	GT	0	0	1	1	1	1	1	0	0	0	1	0	0	0	0	0	1	0	0	1	1	1	0	0	1	1	0	0	0	0	0	0	0	1	1	0	1	0	0	0	0
NC_022541	63055	TGAATTGCGG.CGTGGCGCCA	C	G,A	40	PASS	NA	GT	0	1	1	1	1	1	1	1	1	0	1	1	1	2	1	0	1	1	1	1	1	1	1	0	1	1	2	1	1	1	1	1	1	1	1	2	1	1	1	1	1
NC_022541	63056	GAATTGCGGC.GTGGCGCCAT	G	T	40	PASS	NA	GT	0	0	1	1	1	1	1	0	0	0	1	0	0	0	0	0	1	0	0	1	1	1	0	0	1	1	0	0	0	0	0	0	0	1	1	0	1	0	0	0	0
NC_022541	63061	GCGGCGTGGC.GCCATAGAAC	G	C	40	PASS	NA	GT	0	0	0	0	0	0	0	0	0	0	0	0	0	0	0	0	0	0	0	0	0	0	0	0	0	0	0	0	0	0	0	0	0	0	0	0	0	0	0	0	0
NC_022541	63064	GCGTGGCGCC.ATAGAACGCG	A	G	40	PASS	NA	GT	0	0	0	0	0	0	0	0	0	0	0	0	0	0	0	0	0	0	0	0	0	0	0	0	0	0	0	0	0	0	0	0	0	0	0	0	0	0	0	0	0
NC_022541	63070	CGCCATAGAA.CGCGCAGATG	C	T	40	PASS	NA	GT	0	1	0	0	0	0	0	0	0	0	0	0	0	0	0	0	0	0	0	0	0	0	0	0	0	0	0	0	0	0	0	0	0	0	0	0	0	0	0	0	0
NC_022541	63073	CATAGAACGC.GCAGATGCGC	G	A	40	PASS	NA	GT	0	1	0	0	0	0	0	0	0	0	0	0	0	0	0	0	0	0	0	0	0	0	0	0	0	0	0	0	0	0	0	0	0	0	0	0	0	0	0	0	0
NC_022541	63092	CTTGAGCCGG.CGCAGCACGT	C	A	40	PASS	NA	GT	0	0	0	0	0	0	0	0	0	0	0	0	0	0	0	0	0	0	0	0	0	0	0	0	0	0	0	0	0	0	0	0	0	0	0	0	0	0	0	0	0
NC_022541	63100	GGCGCAGCAC.GTTGGTGACG	G	A	40	PASS	NA	GT	0	1	0	0	0	0	0	0	0	0	0	0	0	0	0	0	0	0	0	0	0	0	0	0	0	0	0	0	0	0	0	0	0	0	0	0	0	0	0	0	0
NC_022541	63109	CGTTGGTGAC.GTGGCTGCCG	G	A	40	PASS	NA	GT	0	0	0	0	0	0	0	1	1	0	0	0	0	1	1	0	0	0	1	0	0	0	1	0	0	0	1	1	1	1	1	1	0	0	0	1	0	1	1	1	1
NC_022541	63121	GGCTGCCGAA.CACGCCGCGG	C	T	40	PASS	NA	GT	0	0	0	0	0	0	0	1	1	0	0	0	0	0	1	0	0	0	1	0	0	0	1	0	0	0	0	1	1	1	1	1	0	0	0	0	0	1	1	1	1
NC_022541	63130	ACACGCCGCG.GTAGGTGTGG	G	A	40	PASS	NA	GT	0	1	1	1	1	1	1	0	0	0	1	0	0	0	0	0	1	0	0	1	1	1	0	0	1	1	0	0	0	0	0	0	0	1	1	0	1	0	0	0	0
NC_022541	63136	CGCGGTAGGT.GTGGATCTCG	G	A	40	PASS	NA	GT	0	0	1	1	1	1	1	0	0	0	1	0	0	1	0	0	1	0	0	1	1	1	0	0	1	1	1	0	0	0	0	0	0	1	1	1	1	0	0	0	0
NC_022541	63169	AGCGCAGGTT.CTCGAAGAAC	C	T	40	PASS	NA	GT	0	0	0	0	0	0	0	0	0	0	0	0	0	0	0	0	0	0	0	0	0	0	0	0	0	0	0	0	0	0	0	0	0	0	0	0	0	0	0	0	0
NC_022541	63196	ACTTGGTGTG.ATGCGGCAGG	A	G	40	PASS	NA	GT	0	0	0	0	0	0	0	1	1	0	0	1	1	0	1	0	0	0	1	0	0	0	1	0	0	0	0	1	1	1	1	1	0	0	0	0	0	1	1	1	1
NC_022541	63214	GGATCGCCTG.GTGCAGCATG	G	A	40	PASS	NA	GT	0	1	0	0	0	0	0	1	1	0	0	1	1	0	1	0	0	0	1	0	0	0	1	0	0	0	0	1	1	1	1	1	1	0	0	0	0	1	1	1	1
NC_022541	63244	TCACCACGAT.GTCGCCATGC	G	A	40	PASS	NA	GT	0	0	0	0	0	0	0	0	0	0	0	0	0	1	0	0	0	0	0	0	0	0	0	0	0	0	1	0	0	0	0	0	0	0	0	1	0	0	0	0	0
NC_022541	63253	TGTCGCCATG.CAACCGAATC	C	T	40	PASS	NA	GT	0	0	0	0	0	0	0	0	0	0	0	0	0	1	0	0	0	0	0	0	0	0	0	0	0	0	1	0	0	0	0	0	0	0	0	1	0	0	0	0	0
NC_022541	63255	TCGCCATGCA.ACCGAATCGC	A	G	40	PASS	NA	GT	0	1	1	1	1	1	1	1	1	0	1	1	1	0	1	0	1	1	1	1	1	1	1	0	1	1	0	1	1	1	1	1	1	1	1	0	1	1	1	1	1
NC_022541	63256	CGCCATGCAA.CCGAATCGCC	C	T	40	PASS	NA	GT	0	0	0	0	0	0	0	0	0	0	0	0	0	1	0	0	0	0	0	0	0	0	0	0	0	0	1	0	0	0	0	0	0	0	0	1	0	0	0	0	0
NC_022541	63259	CATGCAACCG.AATCGCCTGG	A	G	40	PASS	NA	GT	0	1	0	0	0	0	0	0	0	0	0	0	0	0	0	0	0	0	0	0	0	0	0	0	0	0	0	0	0	0	0	0	0	0	0	0	0	0	0	0	0
NC_022541	63268	GAATCGCCTG.GCGCGCATCG	G	C	40	PASS	NA	GT	0	0	0	0	0	0	0	0	0	0	0	0	0	0	0	0	0	0	0	0	0	0	0	0	0	0	0	0	0	0	0	0	0	0	0	0	0	0	0	0	0
NC_022541	63280	GCGCATCGCC.CGGCGTGTCG	C	G	40	PASS	NA	GT	0	1	0	0	0	0	0	1	1	0	0	1	1	1	1	0	0	1	1	0	0	0	1	0	0	0	1	1	1	1	1	1	1	0	0	1	0	1	1	1	1
NC_022541	63292	GCGTGTCGCC.ATCGAAGGTG	A	G	40	PASS	NA	GT	0	1	0	0	0	0	0	0	0	0	0	0	0	0	0	0	0	0	0	0	0	0	0	0	0	0	0	0	0	0	0	0	0	0	0	0	0	0	0	0	0
NC_022541	63307	AGGTGAAGGC.TTTCACGCCC	T	C	40	PASS	NA	GT	0	1	1	1	1	1	1	0	0	0	1	0	0	0	0	0	1	0	0	1	1	1	0	0	1	1	0	0	0	0	0	0	0	1	1	0	1	0	0	0	0
NC_022541	63310	TGAAGGCTTT.CACGCCCAGC	C	G,T	40	PASS	NA	GT	0	1	0	0	0	0	0	0	0	0	0	0	0	0	0	0	0	0	0	0	0	0	0	0	0	0	0	0	0	0	0	0	0	0	0	0	0	0	0	0	0
NC_022541	63313	AGGCTTTCAC.GCCCAGCTCG	G	C	40	PASS	NA	GT	0	1	1	1	1	1	1	0	0	0	1	0	0	0	0	0	1	0	0	1	1	1	0	0	1	1	0	0	0	0	0	0	0	1	1	0	1	0	0	0	0
NC_022541	63325	CCAGCTCGCC.GGCGCGGTTC	G	T	40	PASS	NA	GT	0	0	0	0	0	0	0	0	0	0	0	0	0	1	0	0	0	0	0	0	0	0	0	0	0	0	1	0	0	0	0	0	0	0	0	1	0	0	0	0	0
NC_022541	63379	GCGCCTTGGT.CGGGAACAGG	C	A	40	PASS	NA	GT	0	0	0	0	0	0	0	0	0	0	0	0	0	1	0	0	0	0	0	0	0	0	0	0	0	0	1	0	0	0	0	0	0	0	0	1	0	0	0	0	0
NC_022541	63388	TCGGGAACAG.GTACAAGGCC	G	A	40	PASS	NA	GT	0	0	0	0	0	0	0	0	0	0	0	0	0	0	0	0	0	0	0	0	0	0	0	0	0	0	0	0	0	0	0	0	0	0	0	0	0	0	0	0	0
NC_022541	63393	AACAGGTACA.AGGCCTTGGC	A	G	40	PASS	NA	GT	0	0	1	1	1	1	1	0	0	0	1	0	0	0	0	0	1	0	0	1	1	1	0	0	1	1	0	0	0	0	0	0	0	1	1	0	1	0	0	0	0
NC_022541	63394	ACAGGTACAA.GGCCTTGGCG	G	C	40	PASS	NA	GT	0	0	1	1	1	1	1	0	0	0	1	0	0	0	0	0	1	0	0	1	1	1	0	0	1	1	0	0	0	0	0	0	0	1	1	0	1	0	0	0	0
NC_022541	63403	AGGCCTTGGC.GCCGCTGGTC	G	C	40	PASS	NA	GT	0	0	1	1	1	1	1	0	0	0	1	0	0	0	0	0	1	0	0	1	1	1	0	0	1	1	0	0	0	0	0	0	0	1	1	0	1	0	0	0	0
NC_022541	63407	CTTGGCGCCG.CTGGTCATCG	C	G	40	PASS	NA	GT	0	0	1	1	1	1	1	0	0	0	1	0	0	0	0	0	1	0	0	1	1	1	0	0	1	1	0	0	0	0	0	0	0	1	1	0	1	0	0	0	0
NC_022541	63408	TTGGCGCCGC.TGGTCATCGC	T	A	40	PASS	NA	GT	0	0	1	1	1	1	1	0	0	0	1	0	0	0	0	0	1	0	0	1	1	1	0	0	1	1	0	0	0	0	0	0	0	1	1	0	1	0	0	0	0
NC_022541	63410	GGCGCCGCTG.GTCATCGCCG	G	C	40	PASS	NA	GT	0	0	1	1	1	1	1	0	0	0	1	0	0	0	0	0	1	0	0	1	1	1	0	0	1	1	0	0	0	0	0	0	0	1	1	0	1	0	0	0	0
NC_022541	63411	GCGCCGCTGG.TCATCGCCGC	T	G	40	PASS	NA	GT	0	0	1	1	1	1	1	0	0	0	1	0	0	0	0	0	1	0	0	1	1	1	0	0	1	1	0	0	0	0	0	0	0	1	1	0	1	0	0	0	0
NC_022541	63421	TCATCGCCGC.GCTCACCACC	G	A	40	PASS	NA	GT	0	0	0	0	0	0	0	0	0	0	0	0	0	0	0	0	0	0	0	0	0	0	0	0	0	0	0	0	0	0	0	0	0	0	0	0	0	0	0	0	0
NC_022541	63435	ACCACCGGCA.GCGTGTAGCA	G	A	40	PASS	NA	GT	0	0	1	1	1	1	1	0	0	0	1	0	0	0	0	0	1	0	0	1	1	1	0	0	1	1	0	0	0	0	0	0	0	1	1	0	1	0	0	0	0
NC_022541	63454	ACAGCGATTT.CCCCGAGGCG	C	G,A	40	PASS	NA	GT	0	1	1	1	1	1	1	2	2	0	1	2	2	1	2	0	1	0	2	1	1	1	2	0	1	1	1	2	2	2	2	2	0	1	1	1	1	2	2	2	2
NC_022541	63460	ATTTCCCCGA.GGCGGTGGGC	G	C	40	PASS	NA	GT	0	0	1	1	1	1	1	0	0	0	1	0	0	0	0	0	1	0	0	1	1	1	0	0	1	1	0	0	0	0	0	0	0	1	1	0	1	0	0	0	0
NC_022541	63466	CCGAGGCGGT.GGGCGTCACG	G	T	40	PASS	NA	GT	0	0	0	0	0	0	0	0	0	0	0	0	0	0	0	0	0	0	0	0	0	0	0	0	0	0	0	0	0	0	0	0	0	0	0	0	0	0	0	0	0
NC_022541	63472	CGGTGGGCGT.CACGATCGCC	C	G	40	PASS	NA	GT	0	0	0	0	0	0	0	0	0	0	0	0	0	1	0	0	0	0	0	0	0	0	0	0	0	0	1	0	0	0	0	0	0	0	0	1	0	0	0	0	0
NC_022541	63487	TCGCCACATG.CTCGCCGCGC	C	G	40	PASS	NA	GT	0	0	1	1	1	1	1	0	0	0	1	0	0	0	0	0	1	0	0	1	1	1	0	0	1	1	0	0	0	0	0	0	0	1	1	0	1	0	0	0	0
NC_022541	63496	GCTCGCCGCG.CTGTGTCGCC	C	T	40	PASS	NA	GT	0	0	1	1	1	1	1	0	0	0	1	0	0	0	0	0	1	0	0	1	1	1	0	0	1	1	0	0	0	0	0	0	0	1	1	0	1	0	0	0	0
NC_022541	63499	CGCCGCGCTG.TGTCGCCGCC	T	C,G	40	PASS	NA	GT	0	0	1	1	1	1	1	2	2	0	1	2	2	2	2	0	1	2	2	1	1	1	2	0	1	1	2	2	2	2	2	2	2	1	1	2	1	2	2	2	2
NC_022541	63502	CGCGCTGTGT.CGCCGCCCAG	C	G,T	40	PASS	NA	GT	0	0	1	1	1	1	1	0	0	0	1	0	0	1	0	0	1	0	0	1	1	1	0	0	1	1	1	0	0	0	0	0	0	1	1	1	1	0	0	0	0
NC_022541	63505	GCTGTGTCGC.CGCCCAGGCA	C	T	40	PASS	NA	GT	0	1	0	0	0	0	0	0	0	0	0	0	0	1	0	0	0	0	0	0	0	0	0	0	0	0	1	0	0	0	0	0	0	0	0	1	0	0	0	0	0
NC_022541	63514	CCGCCCAGGC.ATCGGCCTGG	A	G	40	PASS	NA	GT	0	0	0	0	0	0	0	0	0	0	0	0	0	1	0	0	0	0	0	0	0	0	0	0	0	0	1	0	0	0	0	0	0	0	0	1	0	0	0	0	0
NC_022541	63523	CATCGGCCTG.GTGGCTGTAA	G	A	40	PASS	NA	GT	0	0	0	0	0	0	0	0	0	0	0	0	0	0	0	0	0	0	0	0	0	0	0	0	0	0	0	0	0	0	0	0	0	0	0	0	0	0	0	0	0
NC_022541	63532	GGTGGCTGTA.AAGCTGGCTG	A	G	40	PASS	NA	GT	0	1	1	1	1	1	1	1	1	0	1	1	1	1	1	0	1	1	1	1	1	1	1	0	1	1	1	1	1	1	1	1	1	1	1	1	1	1	1	1	1
NC_022541	63547	GGCTGATGCC.GCGCGCGCGC	G	A	40	PASS	NA	GT	0	0	1	1	1	1	1	0	0	0	1	0	0	0	0	0	1	0	0	1	1	1	0	0	1	1	0	0	0	0	0	0	0	1	1	0	1	0	0	0	0
NC_022541	63553	TGCCGCGCGC.GCGCAAGGCG	G	C	40	PASS	NA	GT	0	1	0	0	0	0	0	1	1	0	0	1	1	1	1	0	0	1	1	0	0	0	1	0	0	0	1	1	1	1	1	1	1	0	0	1	0	1	1	1	1
NC_022541	63554	GCCGCGCGCG.CGCAAGGCGT	C	T	40	PASS	NA	GT	0	1	0	0	0	0	0	1	1	0	0	1	1	1	1	0	0	1	1	0	0	0	1	0	0	0	1	1	1	1	1	1	1	0	0	1	0	1	1	1	1
NC_022541	63558	CGCGCGCGCA.AGGCGTCGGC	A	G	40	PASS	NA	GT	0	1	0	0	0	0	0	1	1	0	0	1	1	1	1	0	0	1	1	0	0	0	1	0	0	0	1	1	1	1	1	1	1	0	0	1	0	1	1	1	1
NC_022541	63559	GCGCGCGCAA.GGCGTCGGCC	G	C	40	PASS	NA	GT	0	1	0	0	0	0	0	1	1	0	0	1	1	1	1	0	0	1	1	0	0	0	1	0	0	0	1	1	1	1	1	1	1	0	0	1	0	1	1	1	1
NC_022541	63562	CGCGCAAGGC.GTCGGCCAGC	G	A	40	PASS	NA	GT	0	1	1	1	1	1	1	1	1	0	1	1	1	1	1	0	1	1	1	1	1	1	1	0	1	1	1	1	1	1	1	1	1	1	1	1	1	1	1	1	1
NC_022541	63565	GCAAGGCGTC.GGCCAGCGCC	G	T,A	40	PASS	NA	GT	0	1	2	2	2	2	2	0	0	0	2	0	0	0	0	0	2	0	0	2	2	2	0	0	2	2	0	0	0	0	0	0	0	2	2	0	2	0	0	0	0
NC_022541	63570	GCGTCGGCCA.GCGCCCCGGG	G	A	40	PASS	NA	GT	0	1	0	0	0	0	0	0	0	0	0	0	0	0	0	0	0	0	0	0	0	0	0	0	0	0	0	0	0	0	0	0	0	0	0	0	0	0	0	0	0
NC_022541	63571	CGTCGGCCAG.CGCCCCGGGC	C	T	40	PASS	NA	GT	0	1	0	0	0	0	0	0	0	0	0	0	0	1	0	0	0	0	0	0	0	0	0	0	0	0	1	0	0	0	0	0	0	0	0	1	0	0	0	0	0
NC_022541	63574	CGGCCAGCGC.CCCGGGCACA	C	G	40	PASS	NA	GT	0	1	1	1	1	1	1	1	1	0	1	1	1	1	1	0	1	1	1	1	1	1	1	0	1	1	1	1	1	1	1	1	1	1	1	1	1	1	1	1	1
NC_022541	63575	GGCCAGCGCC.CCGGGCACAT	C	G	40	PASS	NA	GT	0	1	1	1	1	1	1	0	0	0	1	0	0	0	0	0	1	0	0	1	1	1	0	0	1	1	0	0	0	0	0	0	0	1	1	0	1	0	0	0	0
NC_022541	63576	GCCAGCGCCC.CGGGCACATC	C	T	40	PASS	NA	GT	0	0	0	0	0	0	0	0	0	0	0	0	0	1	0	0	0	1	0	0	0	0	0	0	0	0	1	0	0	0	0	0	0	0	0	1	0	0	0	0	0
NC_022541	63577	CCAGCGCCCC.GGGCACATCG	G	C	40	PASS	NA	GT	0	1	1	1	1	1	1	0	0	0	1	0	0	0	0	0	1	0	0	1	1	1	0	0	1	1	0	0	0	0	0	0	0	1	1	0	1	0	0	0	0
NC_022541	63583	CCCCGGGCAC.ATCGTCGGGA	A	G	40	PASS	NA	GT	0	0	1	1	1	1	1	0	0	0	1	0	0	0	0	0	1	0	0	1	1	1	0	0	1	1	0	0	0	0	0	0	0	1	1	0	1	0	0	0	0
NC_022541	63586	CGGGCACATC.GTCGGGAATC	G	C,A	40	PASS	NA	GT	0	1	0	0	0	0	0	0	0	0	0	0	0	0	0	0	0	0	0	0	0	0	0	0	0	0	0	0	0	0	0	0	0	0	0	0	0	0	0	0	0
NC_022541	63587	GGGCACATCG.TCGGGAATCG	T	G,C	40	PASS	NA	GT	0	0	1	1	1	1	1	2	2	0	1	2	2	0	2	0	1	2	2	1	1	1	2	0	1	1	0	2	2	2	2	2	2	1	1	0	1	2	2	2	2
NC_022541	63588	GGCACATCGT.CGGGAATCGG	C	T	40	PASS	NA	GT	0	0	0	0	0	0	0	0	0	0	0	0	0	0	0	0	0	0	0	0	0	0	0	0	0	0	0	0	0	0	0	0	0	0	0	0	0	0	0	0	0
NC_022541	63589	GCACATCGTC.GGGAATCGGC	G	C	40	PASS	NA	GT	0	1	0	0	0	0	0	0	0	0	0	0	0	0	0	0	0	0	0	0	0	0	0	0	0	0	0	0	0	0	0	0	0	0	0	0	0	0	0	0	0
NC_022541	63592	CATCGTCGGG.AATCGGCGCA	A	G	40	PASS	NA	GT	0	1	0	0	0	0	0	1	1	0	0	1	1	1	1	0	0	1	1	0	0	0	1	0	0	0	1	1	1	1	1	1	1	0	0	1	0	1	1	1	1
NC_022541	63601	GAATCGGCGC.ATAGCGGCCC	A	G	40	PASS	NA	GT	0	1	0	0	0	0	0	0	0	0	0	0	0	1	0	0	0	0	0	0	0	0	0	0	0	0	1	0	0	0	0	0	0	0	0	1	0	0	0	0	0
NC_022541	63604	TCGGCGCATA.GCGGCCCGCG	G	A	40	PASS	NA	GT	0	1	1	1	1	1	1	0	0	0	1	0	0	0	0	0	1	0	0	1	1	1	0	0	1	1	0	0	0	0	0	0	0	1	1	0	1	0	0	0	0
NC_022541	63606	GGCGCATAGC.GGCCCGCGCG	G	T,A	40	PASS	NA	GT	0	1	0	0	0	0	0	0	0	0	0	0	0	1	0	0	0	0	0	0	0	0	0	0	0	0	1	0	0	0	0	0	0	0	0	1	0	0	0	0	0
NC_022541	63607	GCGCATAGCG.GCCCGCGCGC	G	T	40	PASS	NA	GT	0	0	0	0	0	0	0	0	0	0	0	0	0	1	0	0	0	0	0	0	0	0	0	0	0	0	1	0	0	0	0	0	0	0	0	1	0	0	0	0	0
NC_022541	63610	CATAGCGGCC.CGCGCGCCCG	C	G,T,A	40	PASS	NA	GT	0	1	1	1	1	1	1	2	2	0	1	2	2	0	2	0	1	2	2	1	1	1	2	0	1	1	0	2	2	2	2	2	2	1	1	0	1	2	2	2	2
NC_022541	63611	ATAGCGGCCC.GCGCGCCCGG	G	T	40	PASS	NA	GT	0	1	1	1	1	1	1	0	0	0	1	0	0	0	0	0	1	0	0	1	1	1	0	0	1	1	0	0	0	0	0	0	0	1	1	0	1	0	0	0	0
NC_022541	63612	TAGCGGCCCG.CGCGCCCGGG	C	T,G	40	PASS	NA	GT	0	0	0	0	0	0	0	1	1	0	0	1	2	0	1	0	0	1	1	0	0	0	1	0	0	0	0	1	1	1	1	1	1	0	0	0	0	1	1	1	1
NC_022541	63616	GGCCCGCGCG.CCCGGGGATG	C	T	40	PASS	NA	GT	0	0	1	1	1	1	1	0	0	0	1	0	0	0	0	0	1	0	0	1	1	1	0	0	1	1	0	0	0	0	0	0	0	1	1	0	1	0	0	0	0
NC_022541	63622	CGCGCCCGGG.GATGGTGAAG	G	C,A	40	PASS	NA	GT	0	0	1	1	1	1	1	2	2	0	1	2	2	2	2	0	1	2	2	1	1	1	2	0	1	1	2	2	2	2	2	2	2	1	1	2	1	2	2	2	2
NC_022541	63624	CGCCCGGGGA.TGGTGAAGCT	T	G	40	PASS	NA	GT	0	0	1	1	1	1	1	0	0	0	1	0	0	0	0	0	1	0	0	1	1	1	0	0	1	1	0	0	0	0	0	0	0	1	1	0	1	0	0	0	0
NC_022541	63628	CGGGGATGGT.GAAGCTGCCG	G	A	40	PASS	NA	GT	0	0	1	1	1	1	1	0	0	0	1	0	0	0	0	0	1	0	0	1	1	1	0	0	1	1	0	0	0	0	0	0	0	1	1	0	1	0	0	0	0
NC_022541	64108	GGCCACCTGC.ATCTATGCGC	A	G	40	PASS	NA	GT	0	0	1	1	1	1	1	0	0	0	1	0	0	0	0	0	1	0	0	1	1	1	0	0	1	1	0	0	0	0	0	0	0	1	1	0	1	0	0	0	0
NC_022541	64110	CCACCTGCAT.CTATGCGCTG	C	T	40	PASS	NA	GT	0	0	0	0	0	0	0	0	0	0	0	1	1	0	0	0	0	1	0	0	0	0	0	0	0	0	0	0	0	0	0	0	1	0	0	0	0	0	0	0	0
NC_022541	64113	CCTGCATCTA.TGCGCTGGGG	T	C	40	PASS	NA	GT	0	1	1	1	1	1	1	0	0	0	1	1	1	1	0	0	1	1	0	1	1	1	0	0	1	1	1	0	0	0	0	0	1	1	1	1	1	0	0	0	0
NC_022541	64123	TGCGCTGGGG.CTGCTGGTGA	C	T	40	PASS	NA	GT	0	0	1	1	1	1	1	0	0	0	1	0	0	0	0	0	1	0	0	1	1	1	0	0	1	1	0	0	0	0	0	0	0	1	1	0	1	0	0	0	0
NC_022541	64139	GTGATGTTCG.CCTGTTCGGC	C	G	40	PASS	NA	GT	0	0	1	1	1	1	1	0	0	0	1	0	0	0	0	0	1	0	0	1	1	1	0	0	1	1	0	0	0	0	0	0	0	1	1	0	1	0	0	0	0
NC_022541	64143	TGTTCGCCTG.TTCGGCGGCC	T	C	40	PASS	NA	GT	0	0	1	1	1	1	1	0	0	0	1	0	0	0	0	0	1	0	0	1	1	1	0	0	1	1	0	0	0	0	0	0	0	1	1	0	1	0	0	0	0
NC_022541	64158	CGGCCTACAA.CTTCGCCCCG	C	T	40	PASS	NA	GT	0	0	0	0	0	0	0	0	0	0	0	0	0	0	0	0	0	0	0	0	0	0	0	0	0	0	0	0	0	0	0	0	0	0	0	0	0	0	0	0	0
NC_022541	64164	ACAACTTCGC.CCCGCCGCAG	C	A	40	PASS	NA	GT	0	1	0	0	0	0	0	0	0	0	0	0	0	0	0	0	0	0	0	0	0	0	0	0	0	0	0	0	0	0	0	0	0	0	0	0	0	0	0	0	0
NC_022541	64172	GCCCCGCCGC.AGCGCCAACC	A	C	40	PASS	NA	GT	0	0	0	0	0	0	0	0	0	0	0	0	0	0	0	0	0	0	0	0	0	0	0	0	0	0	0	0	0	0	0	0	0	0	0	0	0	0	0	0	0
NC_022541	64173	CCCCGCCGCA.GCGCCAACCG	G	A	40	PASS	NA	GT	0	0	1	1	1	1	1	0	0	0	1	0	0	0	0	0	1	0	0	1	1	1	0	0	1	1	0	0	0	0	0	0	0	1	1	0	1	0	0	0	0
NC_022541	64179	CGCAGCGCCA.ACCGATGCTG	A	G	40	PASS	NA	GT	0	1	1	1	1	1	1	1	1	0	1	0	0	1	1	0	1	1	1	1	1	1	1	0	1	1	1	1	1	1	1	1	0	1	1	1	1	1	1	1	1
NC_022541	64200	GCAAGTTCGA.TCACGCCGGC	T	C	40	PASS	NA	GT	0	1	1	1	1	1	1	0	0	0	1	0	0	1	0	0	1	0	0	1	1	1	0	0	1	1	1	0	0	0	0	0	0	1	1	1	1	0	0	0	0
NC_022541	64218	GCATCTTCGT.CATGATCGCC	C	G	40	PASS	NA	GT	0	0	1	1	1	1	1	0	0	0	1	0	0	0	0	0	1	0	0	1	1	1	0	0	1	1	0	0	0	0	0	0	0	1	1	0	1	0	0	0	0
NC_022541	64224	TCGTCATGAT.CGCCGGCTCC	C	T	40	PASS	NA	GT	0	1	1	1	1	1	1	1	1	0	1	1	1	1	1	0	1	1	1	1	1	1	1	0	1	1	1	1	1	1	1	1	1	1	1	1	1	1	1	1	1
NC_022541	64230	TGATCGCCGG.CTCCTACACG	C	T	40	PASS	NA	GT	0	0	0	0	0	0	0	0	0	0	0	0	0	0	0	0	0	0	0	0	0	0	0	0	0	0	0	0	0	0	0	0	1	0	0	0	0	0	0	0	0
NC_022541	64236	CCGGCTCCTA.CACGCCGTTC	C	T	40	PASS	NA	GT	0	0	1	1	1	1	1	0	0	0	1	0	0	0	0	0	1	0	0	1	1	1	0	0	1	1	0	0	0	0	0	0	0	1	1	0	1	0	0	0	0
NC_022541	64239	GCTCCTACAC.GCCGTTCTTC	G	C	40	PASS	NA	GT	0	0	1	1	1	1	1	0	0	0	1	0	0	0	0	0	1	0	0	1	1	1	0	0	1	1	0	0	0	0	0	0	0	1	1	0	1	0	0	0	0
NC_022541	64245	ACACGCCGTT.CTTCCTGGTG	C	T	40	PASS	NA	GT	0	1	0	0	0	0	0	1	1	0	0	1	1	1	1	0	0	1	1	0	0	0	1	0	0	0	1	1	1	1	1	1	1	0	0	1	0	1	1	1	1
NC_022541	64246	CACGCCGTTC.TTCCTGGTGG	T	C	40	PASS	NA	GT	0	0	1	1	1	1	1	0	0	0	1	0	0	0	0	0	1	0	0	1	1	1	0	0	1	1	0	0	0	0	0	0	0	1	1	0	1	0	0	0	0
NC_022541	64248	CGCCGTTCTT.CCTGGTGGCA	C	G	40	PASS	NA	GT	0	0	1	1	1	1	1	0	0	0	1	0	0	0	0	0	1	0	0	1	1	1	0	0	1	1	0	0	0	0	0	0	0	1	1	0	1	0	0	0	0
NC_022541	64253	TTCTTCCTGG.TGGCACTGGA	T	C	40	PASS	NA	GT	0	0	0	0	0	0	0	0	0	0	0	0	0	0	0	0	0	0	0	0	0	0	0	0	0	0	0	0	0	0	0	0	0	0	0	0	0	0	0	0	0
NC_022541	64254	TCTTCCTGGT.GGCACTGGAC	G	C	40	PASS	NA	GT	0	0	1	1	1	1	1	0	0	0	1	0	0	0	0	0	1	0	0	1	1	1	0	0	1	1	0	0	0	0	0	0	0	1	1	0	1	0	0	0	0
NC_022541	64257	TCCTGGTGGC.ACTGGACGGC	A	G,C	40	PASS	NA	GT	0	1	2	2	2	2	2	1	1	0	2	0	0	0	1	0	2	1	1	2	2	2	1	0	2	2	0	1	1	1	1	1	0	2	2	0	2	1	1	1	1
NC_022541	64260	TGGTGGCACT.GGACGGCACC	G	C	40	PASS	NA	GT	0	0	1	1	1	1	1	0	0	0	1	0	0	0	0	0	1	0	0	1	1	1	0	0	1	1	0	0	0	0	0	0	0	1	1	0	1	0	0	0	0
NC_022541	64263	TGGCACTGGA.CGGCACCTGG	C	T	40	PASS	NA	GT	0	0	0	0	0	0	0	0	0	0	0	0	0	0	0	0	0	0	0	0	0	0	0	0	0	0	0	0	0	0	0	0	0	0	0	0	0	0	0	0	0
NC_022541	64266	CACTGGACGG.CACCTGGCGC	C	A	40	PASS	NA	GT	0	0	0	0	0	0	0	0	0	0	0	0	0	0	0	0	0	0	0	0	0	0	0	0	0	0	0	0	0	0	0	0	0	0	0	0	0	0	0	0	0
NC_022541	64267	ACTGGACGGC.ACCTGGCGCT	A	C	40	PASS	NA	GT	0	0	0	0	0	0	0	0	0	0	0	0	0	0	0	0	0	0	0	0	0	0	0	0	0	0	0	0	0	0	0	0	0	0	0	0	0	0	0	0	0
NC_022541	64268	CTGGACGGCA.CCTGGCGCTG	C	G	40	PASS	NA	GT	0	0	0	0	0	0	0	1	1	0	0	1	1	0	1	0	0	1	1	0	0	0	1	0	0	0	0	1	1	1	1	1	1	0	0	0	0	1	1	1	1
NC_022541	64274	GGCACCTGGC.GCTGGGTGAT	G	T	40	PASS	NA	GT	0	0	0	0	0	0	0	0	0	0	0	0	0	1	0	0	0	0	0	0	0	0	0	0	0	0	1	0	0	0	0	0	0	0	0	1	0	0	0	0	0
NC_022541	64280	TGGCGCTGGG.TGATGATCCT	T	C	40	PASS	NA	GT	0	0	1	1	1	1	1	0	0	0	1	0	0	0	0	0	1	0	0	1	1	1	0	0	1	1	0	0	0	0	0	0	0	1	1	0	1	0	0	0	0
NC_022541	64287	GGGTGATGAT.CCTCAGCGTC	C	T	40	PASS	NA	GT	0	0	0	0	0	0	0	0	0	0	0	1	1	0	0	0	0	0	0	0	0	0	0	0	0	0	0	0	0	0	0	0	0	0	0	0	0	0	0	0	0
NC_022541	64290	TGATGATCCT.CAGCGTCTGG	C	G	40	PASS	NA	GT	0	0	1	1	1	1	1	0	0	0	1	0	0	0	0	0	1	0	0	1	1	1	0	0	1	1	0	0	0	0	0	0	0	1	1	0	1	0	0	0	0
NC_022541	64291	GATGATCCTC.AGCGTCTGGT	A	G	40	PASS	NA	GT	0	0	1	1	1	1	1	0	0	0	1	0	0	0	0	0	1	0	0	1	1	1	0	0	1	1	0	0	0	0	0	0	0	1	1	0	1	0	0	0	0
NC_022541	64293	TGATCCTCAG.CGTCTGGTGC	C	T	40	PASS	NA	GT	0	0	0	0	0	0	0	0	0	0	0	0	0	1	0	0	0	0	0	0	0	0	0	0	0	0	1	0	0	0	0	0	0	0	0	1	0	0	0	0	0
NC_022541	64296	TCCTCAGCGT.CTGGTGCGTG	C	G	40	PASS	NA	GT	0	0	1	1	1	1	1	0	0	0	1	0	0	0	0	0	1	0	0	1	1	1	0	0	1	1	0	0	0	0	0	0	0	1	1	0	1	0	0	0	0
NC_022541	64300	CAGCGTCTGG.TGCGTGGCCT	T	G	40	PASS	NA	GT	0	0	1	1	1	1	1	0	0	0	1	0	0	0	0	0	1	0	0	1	1	1	0	0	1	1	0	0	0	0	0	0	0	1	1	0	1	0	0	0	0
NC_022541	64309	GTGCGTGGCC.TTGTTCGGCG	T	C	40	PASS	NA	GT	0	1	0	0	0	0	0	0	0	0	0	1	1	0	0	0	0	0	0	0	0	0	0	0	0	0	0	0	0	0	0	0	0	0	0	0	0	0	0	0	0
NC_022541	64314	TGGCCTTGTT.CGGCGTGTTC	C	T	40	PASS	NA	GT	0	0	0	0	0	0	0	1	1	0	0	0	0	0	1	0	0	0	1	0	0	0	1	0	0	0	0	1	1	1	1	1	0	0	0	0	0	1	1	1	1
NC_022541	64320	TGTTCGGCGT.GTTCGCCAAG	G	A	40	PASS	NA	GT	0	0	0	0	0	0	0	1	1	0	0	1	1	0	1	0	0	1	1	0	0	0	1	0	0	0	0	1	1	1	1	1	1	0	0	0	0	1	1	1	1
NC_022541	64329	TGTTCGCCAA.GCTATGCCTG	G	A	40	PASS	NA	GT	0	0	0	0	0	0	0	0	0	0	0	0	0	0	0	0	0	0	0	0	0	0	0	0	0	0	0	0	0	0	0	0	0	0	0	0	0	0	0	0	0
NC_022541	64330	GTTCGCCAAG.CTATGCCTGC	C	T	40	PASS	NA	GT	0	1	0	0	0	0	0	0	0	0	0	0	0	0	0	0	0	1	0	0	0	0	0	0	0	0	0	0	0	0	0	0	0	0	0	0	0	0	0	0	0
NC_022541	64332	TCGCCAAGCT.ATGCCTGCCC	A	G	40	PASS	NA	GT	0	1	1	1	1	1	1	1	1	0	1	1	1	1	1	0	1	1	1	1	1	1	1	0	1	1	1	1	1	1	1	1	1	1	1	1	1	1	1	1	1
NC_022541	64334	GCCAAGCTAT.GCCTGCCCGG	G	T	40	PASS	NA	GT	0	0	1	1	1	1	1	0	0	0	1	0	0	0	0	0	1	0	0	1	1	1	0	0	1	1	0	0	0	0	0	0	0	1	1	0	1	0	0	0	0
NC_022541	64336	CAAGCTATGC.CTGCCCGGCA	C	T	40	PASS	NA	GT	0	0	0	0	0	0	0	0	0	0	0	0	0	0	0	0	0	0	0	0	0	0	0	0	0	0	0	0	0	0	0	0	0	0	0	0	0	0	0	0	0
NC_022541	64356	TCGCCAAGGG.CTTCTGGGTG	C	G	40	PASS	NA	GT	0	0	0	0	0	0	0	0	0	0	0	0	0	0	0	0	0	0	0	0	0	0	0	0	0	0	0	0	0	0	0	0	0	0	0	0	0	0	0	0	0
NC_022541	64367	TTCTGGGTGG.CGATCTATCT	C	T	40	PASS	NA	GT	0	0	1	1	1	1	1	0	0	0	1	0	0	0	0	0	1	0	0	1	1	1	0	0	1	1	0	0	0	0	0	0	0	1	1	0	1	0	0	0	0
NC_022541	64374	TGGCGATCTA.TCTGCTGTTG	T	C	40	PASS	NA	GT	0	0	1	1	1	1	1	0	0	0	1	0	0	1	0	0	1	0	0	1	1	1	0	0	1	1	1	0	0	0	0	0	0	1	1	1	1	0	0	0	0
NC_022541	64378	GATCTATCTG.CTGTTGGGCT	C	T	40	PASS	NA	GT	0	0	1	1	1	1	1	0	0	0	1	0	0	0	0	0	1	0	0	1	1	1	0	0	1	1	0	0	0	0	0	0	0	1	1	0	1	0	0	0	0
NC_022541	64381	CTATCTGCTG.TTGGGCTGGG	T	C	40	PASS	NA	GT	0	1	1	1	1	1	1	1	1	0	1	1	1	1	1	0	1	1	1	1	1	1	1	0	1	1	1	1	1	1	1	1	1	1	1	1	1	1	1	1	1
NC_022541	64410	TGGTGATCAA.CCAGATGATC	C	G	40	PASS	NA	GT	0	0	1	1	1	1	1	0	0	0	1	0	0	0	0	0	1	0	0	1	1	1	0	0	1	1	0	0	0	0	0	0	0	1	1	0	1	0	0	0	0
NC_022541	64412	GTGATCAACC.AGATGATCGC	A	C	40	PASS	NA	GT	0	0	1	1	1	1	1	0	0	0	1	0	0	0	0	0	1	0	0	1	1	1	0	0	1	1	0	0	0	0	0	0	0	1	1	0	1	0	0	0	0
NC_022541	64413	TGATCAACCA.GATGATCGCC	G	C	40	PASS	NA	GT	0	0	0	0	0	0	0	0	0	0	0	0	0	0	0	0	0	0	0	0	0	0	0	0	0	0	0	0	0	0	0	0	0	0	0	0	0	0	0	0	0
NC_022541	64414	GATCAACCAG.ATGATCGCCG	A	C	40	PASS	NA	GT	0	0	1	1	1	1	1	0	0	0	1	0	0	0	0	0	1	0	0	1	1	1	0	0	1	1	0	0	0	0	0	0	0	1	1	0	1	0	0	0	0
NC_022541	64416	TCAACCAGAT.GATCGCCGGG	G	C	40	PASS	NA	GT	0	0	0	0	0	0	0	0	0	0	0	0	0	0	0	0	0	0	0	0	0	0	0	0	0	0	0	0	0	0	0	0	0	0	0	0	0	0	0	0	0
NC_022541	64417	CAACCAGATG.ATCGCCGGGC	A	C,G	40	PASS	NA	GT	0	0	1	1	1	1	1	0	0	0	1	0	0	0	0	0	1	0	0	1	1	1	0	0	1	1	0	0	0	0	0	0	0	1	1	0	1	0	0	0	0
NC_022541	64419	ACCAGATGAT.CGCCGGGCTG	C	G	40	PASS	NA	GT	0	0	0	0	0	0	0	0	0	0	0	0	0	0	0	0	0	0	0	0	0	0	0	0	0	0	0	0	0	0	0	0	0	0	0	0	0	0	0	0	0
NC_022541	64425	TGATCGCCGG.GCTGGACAGC	G	C,T	40	PASS	NA	GT	0	0	1	1	1	1	1	0	0	0	1	0	0	0	0	0	1	0	0	1	1	1	0	0	1	1	0	0	0	0	0	0	0	1	1	0	1	0	0	0	0
NC_022541	64435	GCTGGACAGC.GCGGTGCTGT	G	A	40	PASS	NA	GT	0	0	1	1	1	1	1	0	0	0	1	0	0	0	0	0	1	0	0	1	1	1	0	0	1	1	0	0	0	0	0	0	0	1	1	0	1	0	0	0	0
NC_022541	64437	TGGACAGCGC.GGTGCTGTGG	G	C	40	PASS	NA	GT	0	0	1	1	1	1	1	0	0	0	1	0	0	0	0	0	1	0	0	1	1	1	0	0	1	1	0	0	0	0	0	0	0	1	1	0	1	0	0	0	0
NC_022541	64443	GCGCGGTGCT.GTGGCTCATC	G	C	40	PASS	NA	GT	0	0	0	0	0	0	0	0	0	0	0	0	0	1	0	0	0	0	0	0	0	0	0	0	0	0	1	0	0	0	0	0	0	0	0	1	0	0	0	0	0
NC_022541	64449	TGCTGTGGCT.CATCGTTGCC	C	G	40	PASS	NA	GT	0	0	1	1	1	1	1	0	0	0	1	0	0	0	0	0	1	0	0	1	1	1	0	0	1	1	0	0	0	0	0	0	0	1	1	0	1	0	0	0	0
NC_022541	64454	TGGCTCATCG.TTGCCGGCGG	T	C	40	PASS	NA	GT	0	0	1	1	1	1	1	0	0	0	1	0	0	0	0	0	1	0	0	1	1	1	0	0	1	1	0	0	0	0	0	0	0	1	1	0	1	0	0	0	0
NC_022541	64455	GGCTCATCGT.TGCCGGCGGC	T	C	40	PASS	NA	GT	0	0	1	1	1	1	1	0	0	0	1	0	0	1	0	0	1	0	0	1	1	1	0	0	1	1	1	0	0	0	0	0	0	1	1	1	1	0	0	0	0
NC_022541	64456	GCTCATCGTT.GCCGGCGGCG	G	A	40	PASS	NA	GT	0	0	0	0	0	0	0	0	0	0	0	0	0	1	0	0	0	0	0	0	0	0	0	0	0	0	1	0	0	0	0	0	0	0	0	1	0	0	0	0	0
NC_022541	64457	CTCATCGTTG.CCGGCGGCGC	C	G	40	PASS	NA	GT	0	0	0	0	0	0	0	0	0	0	0	0	0	0	0	0	0	0	0	0	0	0	0	0	0	0	0	0	0	0	0	0	0	0	0	0	0	0	0	0	0
NC_022541	64464	TTGCCGGCGG.CGCCTTCTAC	C	T	40	PASS	NA	GT	0	0	0	0	0	0	0	0	0	0	0	0	0	1	0	0	0	0	0	0	0	0	0	0	0	0	1	0	0	0	0	0	0	0	0	1	0	0	0	0	0
NC_022541	64467	CCGGCGGCGC.CTTCTACACC	C	G	40	PASS	NA	GT	0	0	1	1	1	1	1	0	0	0	1	0	0	1	0	0	1	0	0	1	1	1	0	0	1	1	1	0	0	0	0	0	0	1	1	1	1	0	0	0	0
NC_022541	64470	GCGGCGCCTT.CTACACCGTG	C	T	40	PASS	NA	GT	0	0	0	0	0	0	0	1	1	0	0	1	1	0	1	0	0	1	1	0	0	0	1	0	0	0	0	1	1	1	1	1	1	0	0	0	0	1	1	1	1
NC_022541	64476	CCTTCTACAC.CGTGGGCGTG	C	G	40	PASS	NA	GT	0	0	0	0	0	0	0	0	0	0	0	1	1	1	0	0	0	1	0	0	0	0	0	0	0	0	1	0	0	0	0	0	1	0	0	1	0	0	0	0	0
NC_022541	64485	CCGTGGGCGT.GGCGTTCTAC	G	C,A	40	PASS	NA	GT	0	0	1	1	1	1	1	1	1	0	1	1	1	2	1	0	1	1	1	1	1	1	1	0	1	1	2	1	1	1	1	1	1	1	1	2	1	1	1	1	1
NC_022541	64486	CGTGGGCGTG.GCGTTCTACG	G	A,T	40	PASS	NA	GT	0	0	1	1	1	1	1	0	0	0	1	0	0	2	0	0	1	0	0	1	1	1	0	0	1	1	2	0	0	0	0	0	0	1	1	2	1	0	0	0	0
NC_022541	64487	GTGGGCGTGG.CGTTCTACGT	C	G	40	PASS	NA	GT	0	0	0	0	0	0	0	0	0	0	0	0	0	1	0	0	0	0	0	0	0	0	0	0	0	0	1	0	0	0	0	0	0	0	0	1	0	0	0	0	0
NC_022541	64488	TGGGCGTGGC.GTTCTACGTG	G	C	40	PASS	NA	GT	0	0	1	1	1	1	1	0	0	0	1	0	0	1	0	0	1	0	0	1	1	1	0	0	1	1	1	0	0	0	0	0	0	1	1	1	1	0	0	0	0
NC_022541	64498	GTTCTACGTG.CGCAAATCCA	C	A	40	PASS	NA	GT	0	0	1	1	1	1	1	0	0	0	1	0	0	0	0	0	1	0	0	1	1	1	0	0	1	1	0	0	0	0	0	0	0	1	1	0	1	0	0	0	0
NC_022541	64503	ACGTGCGCAA.ATCCATGGTC	A	G	40	PASS	NA	GT	0	0	1	1	1	1	1	0	0	0	1	0	0	1	0	0	1	0	0	1	1	1	0	0	1	1	1	0	0	0	0	0	0	1	1	1	1	0	0	0	0
NC_022541	64506	TGCGCAAATC.CATGGTCTAC	C	G	40	PASS	NA	GT	0	0	1	1	1	1	1	0	0	0	1	0	0	0	0	0	1	0	0	1	1	1	0	0	1	1	0	0	0	0	0	0	0	1	1	0	1	0	0	0	0
NC_022541	64507	GCGCAAATCC.ATGGTCTACA	A	C	40	PASS	NA	GT	0	0	1	1	1	1	1	0	0	0	1	0	0	0	0	0	1	0	0	1	1	1	0	0	1	1	0	0	0	0	0	0	0	1	1	0	1	0	0	0	0
NC_022541	64515	CCATGGTCTA.CAACCGCGCC	C	T	40	PASS	NA	GT	0	0	0	0	0	0	0	0	0	0	0	0	0	0	0	0	0	0	0	0	0	0	0	0	0	0	0	0	0	0	0	0	0	0	0	0	0	0	0	0	0
NC_022541	64518	TGGTCTACAA.CCGCGCCATC	C	T	40	PASS	NA	GT	0	0	1	1	1	1	1	0	0	0	1	0	0	0	0	0	1	0	0	1	1	1	0	0	1	1	0	0	0	0	0	0	0	1	1	0	1	0	0	0	0
NC_022541	64539	GGCACGCCCA.TGTGCTGGGC	T	C	40	PASS	NA	GT	0	0	1	1	1	1	1	0	0	0	1	0	0	1	0	0	1	0	0	1	1	1	0	0	1	1	1	0	0	0	0	0	0	1	1	1	1	0	0	0	0
NC_022541	64545	CCCATGTGCT.GGGCGGCGCA	G	C	40	PASS	NA	GT	0	0	0	0	0	0	0	0	0	0	0	0	0	0	0	0	0	0	0	0	0	0	0	0	0	0	0	0	0	0	0	0	0	0	0	0	0	0	0	0	0
NC_022541	64554	TGGGCGGCGC.ACTGTCGCAC	A	G	40	PASS	NA	GT	0	1	1	1	1	1	1	0	0	0	1	0	0	1	0	0	1	0	0	1	1	1	0	0	1	1	1	0	0	0	0	0	0	1	1	1	1	0	0	0	0
NC_022541	64555	GGGCGGCGCA.CTGTCGCACT	C	T	40	PASS	NA	GT	0	0	0	0	0	0	0	1	1	0	0	1	1	0	1	0	0	1	1	0	0	0	1	0	0	0	0	1	1	1	1	1	1	0	0	0	0	1	1	1	1
NC_022541	64712	AGCGTCAGGC.GACCGAACTC	G	A,T	40	PASS	NA	GT	0	0	1	1	1	1	1	0	0	0	1	0	0	1	0	0	1	0	0	1	1	1	0	0	1	1	1	0	0	0	0	0	0	1	1	1	1	0	0	0	0
NC_022541	64714	CGTCAGGCGA.CCGAACTCCT	C	A	40	PASS	NA	GT	0	0	0	0	0	0	0	0	0	0	0	0	0	0	0	0	0	0	0	0	0	0	0	0	0	0	0	0	0	0	0	0	0	0	0	0	0	0	0	0	0
NC_022541	64720	GCGACCGAAC.TCCTTGCAGC	T	C	40	PASS	NA	GT	0	1	0	0	0	0	0	0	0	0	0	0	0	0	0	0	0	0	0	0	0	0	0	0	0	0	0	0	0	0	0	0	0	0	0	0	0	0	0	0	0
NC_022541	64732	CTTGCAGCTG.CAGAGCGCGA	C	T	40	PASS	NA	GT	0	0	0	0	0	0	0	0	0	0	0	0	0	0	0	0	0	0	0	0	0	0	0	0	0	0	0	0	0	0	0	0	0	0	0	0	0	0	0	0	0
NC_022541	64735	GCAGCTGCAG.AGCGCGACAA	A	C	40	PASS	NA	GT	0	0	1	1	1	1	1	0	0	0	1	0	0	1	0	0	1	0	0	1	1	1	0	0	1	1	1	0	0	0	0	0	0	1	1	1	1	0	0	0	0
NC_022541	64755	GGAGCCAATC.CTGATCACAC	C	T	40	PASS	NA	GT	0	0	1	1	1	1	1	0	0	0	1	0	0	1	0	0	1	0	0	1	1	1	0	0	1	1	1	0	0	0	0	0	0	1	1	1	1	0	0	0	0
NC_022541	64767	GATCACACAG.CACGGTTTAC	C	T	40	PASS	NA	GT	0	0	1	1	1	1	1	0	0	0	1	0	0	1	0	0	1	0	0	1	1	1	0	0	1	1	1	0	0	0	0	0	0	1	1	1	1	0	0	0	0
NC_022541	64774	CAGCACGGTT.TACCCAGTGC	T	C	40	PASS	NA	GT	0	0	1	1	1	1	1	0	0	0	1	0	0	1	0	0	1	0	0	1	1	1	0	0	1	1	1	0	0	0	0	0	0	1	1	1	1	0	0	0	0
NC_022541	64775	AGCACGGTTT.ACCCAGTGCC	A	G	40	PASS	NA	GT	0	0	0	0	0	0	0	0	0	0	0	0	0	0	0	0	0	0	0	0	0	0	0	0	0	0	0	0	0	0	0	0	0	0	0	0	0	0	0	0	0
NC_022541	64776	GCACGGTTTA.CCCAGTGCCT	C	T	40	PASS	NA	GT	0	0	0	0	0	0	0	0	0	0	0	0	0	0	0	0	0	0	0	0	0	0	0	0	0	0	0	0	0	0	0	0	0	0	0	0	0	0	0	0	0
NC_022541	64780	GGTTTACCCA.GTGCCTATCT	G	A	40	PASS	NA	GT	0	0	0	0	0	0	0	0	0	0	0	0	0	0	0	0	0	0	0	0	0	0	0	0	0	0	0	0	0	0	0	0	0	0	0	0	0	0	0	0	0
NC_022541	64781	GTTTACCCAG.TGCCTATCTG	T	A,C	40	PASS	NA	GT	0	1	0	0	0	0	0	0	0	0	0	0	0	0	0	0	0	0	0	0	0	0	0	0	0	0	0	0	0	0	0	0	0	0	0	0	0	0	0	0	0
NC_022541	64788	CAGTGCCTAT.CTGGTGGATG	C	G	40	PASS	NA	GT	0	1	0	0	0	0	0	0	0	0	0	0	0	0	0	0	0	0	0	0	0	0	0	0	0	0	0	0	0	0	0	0	0	0	0	0	0	0	0	0	0
NC_022541	64795	TATCTGGTGG.ATGTTGCCAG	A	G	40	PASS	NA	GT	0	0	1	1	1	1	1	0	0	0	1	0	0	1	0	0	1	0	0	1	1	1	0	0	1	1	1	0	0	0	0	0	0	1	1	1	1	0	0	0	0
NC_022541	64806	TGTTGCCAGC.TATGAGCGCA	T	G	40	PASS	NA	GT	0	1	1	1	1	1	1	0	0	0	1	0	0	1	0	0	1	0	0	1	1	1	0	0	1	1	1	0	0	0	0	0	0	1	1	1	1	0	0	0	0
NC_022541	64818	TGAGCGCATG.CAGCAGCGCA	C	A	40	PASS	NA	GT	0	0	1	1	1	1	1	0	0	0	1	0	0	0	0	0	1	0	0	1	1	1	0	0	1	1	0	0	0	0	0	0	0	1	1	0	1	0	0	0	0
NC_022541	64828	CAGCAGCGCA.TTGCGCTCCT	T	C	40	PASS	NA	GT	0	0	1	1	1	1	1	0	0	0	1	0	0	0	0	0	1	0	0	1	1	1	0	0	1	1	0	0	0	0	0	0	0	1	1	0	1	0	0	0	0
NC_022541	64829	AGCAGCGCAT.TGCGCTCCTC	T	G	40	PASS	NA	GT	0	0	0	0	0	0	0	0	0	0	0	0	0	0	0	0	0	0	0	0	0	0	0	0	0	0	0	0	0	0	0	0	0	0	0	0	0	0	0	0	0
NC_022541	64835	GCATTGCGCT.CCTCGAAGGA	C	G	40	PASS	NA	GT	0	0	1	1	1	1	1	0	0	0	1	0	0	1	0	0	1	0	0	1	1	1	0	0	1	1	1	0	0	0	0	0	0	1	1	1	1	0	0	0	0
NC_022541	64838	TTGCGCTCCT.CGAAGGAATC	C	G	40	PASS	NA	GT	0	1	0	0	0	0	0	0	0	0	0	0	0	0	0	0	0	0	0	0	0	0	0	0	0	0	0	0	0	0	0	0	0	0	0	0	0	0	0	0	0
NC_022541	64844	TCCTCGAAGG.AATCGCCCGG	A	C	40	PASS	NA	GT	0	0	0	0	0	0	0	0	0	0	0	0	0	0	0	0	0	0	0	0	0	0	0	0	0	0	0	0	0	0	0	0	0	0	0	0	0	0	0	0	0
NC_022541	64847	TCGAAGGAAT.CGCCCGGGGA	C	T	40	PASS	NA	GT	0	0	0	0	0	0	0	0	0	0	0	0	0	0	0	0	0	0	0	0	0	0	0	0	0	0	0	0	0	0	0	0	0	0	0	0	0	0	0	0	0
NC_022541	64853	GAATCGCCCG.GGGAGAAATG	G	T	40	PASS	NA	GT	0	1	1	1	1	1	1	1	1	0	1	1	1	1	1	0	1	1	1	1	1	1	1	0	1	1	1	1	1	1	1	1	1	1	1	1	1	1	1	1	1
NC_022541	64868	AAATGGCAGT.CGCGGAAGGC	C	T	40	PASS	NA	GT	0	0	0	0	0	0	0	0	0	0	0	0	0	0	0	0	0	1	0	0	0	0	0	0	0	0	0	0	0	0	0	0	0	0	0	0	0	0	0	0	0
NC_022541	64872	GGCAGTCGCG.GAAGGCCGTA	G	C	40	PASS	NA	GT	0	1	1	1	1	1	1	0	0	0	1	0	0	0	0	0	1	0	0	1	1	1	0	0	1	1	0	0	0	0	0	0	0	1	1	0	1	0	0	0	0
NC_022541	64874	CAGTCGCGGA.AGGCCGTACG	A	C	40	PASS	NA	GT	0	0	0	0	0	0	0	0	0	0	0	0	0	0	0	0	0	0	0	0	0	0	0	0	0	0	0	0	0	0	0	0	0	0	0	0	0	0	0	0	0
NC_022541	64887	CCGTACGCTG.AGCCATGAAC	A	C	40	PASS	NA	GT	0	1	0	0	0	0	0	0	0	0	0	0	0	0	0	0	0	0	0	0	0	0	0	0	0	0	0	0	0	0	0	0	0	0	0	0	0	0	0	0	0
NC_022541	64903	GAACAGGCAC.AGCAACGCAT	A	G	40	PASS	NA	GT	0	0	1	1	1	1	1	1	1	0	1	1	1	1	1	0	1	0	1	1	1	1	1	0	1	1	1	1	1	1	1	1	1	1	1	1	1	1	1	1	1
NC_022541	64907	AGGCACAGCA.ACGCATGGCG	A	C	40	PASS	NA	GT	0	0	0	0	0	0	0	1	1	0	0	1	1	0	1	0	0	0	1	0	0	0	1	0	0	0	0	1	1	1	1	1	1	0	0	0	0	1	1	1	1
NC_022541	64909	GCACAGCAAC.GCATGGCGCG	G	A	40	PASS	NA	GT	0	1	0	0	0	0	0	0	0	0	0	0	0	0	0	0	0	0	0	0	0	0	0	0	0	0	0	0	0	0	0	0	0	0	0	0	0	0	0	0	0
NC_022541	64939	TAATCTGGTC.GGTGCCGGCA	G	A	40	PASS	NA	GT	0	0	0	0	0	0	0	0	0	0	0	0	0	0	0	0	0	0	0	0	0	0	0	0	0	0	0	0	0	0	0	0	0	0	0	0	0	0	0	0	0
NC_022541	64957	CATTGGCTGA.TCTGGACGCA	T	A	40	PASS	NA	GT	0	0	0	0	0	0	0	0	0	0	0	0	0	0	0	0	0	0	0	0	0	0	0	0	0	0	0	0	0	0	0	0	0	0	0	0	0	0	0	0	0
NC_022541	64958	ATTGGCTGAT.CTGGACGCAA	C	T	40	PASS	NA	GT	0	0	0	0	0	0	0	0	0	0	0	0	0	0	0	0	0	0	0	0	0	0	0	0	0	0	0	0	0	0	0	0	0	0	0	0	0	0	0	0	0
NC_022541	64966	ATCTGGACGC.AATCGCCGAC	A	G	40	PASS	NA	GT	0	0	0	0	0	0	0	0	0	0	0	0	0	0	0	0	0	0	0	0	0	0	0	0	0	0	0	0	0	0	0	0	0	0	0	0	0	0	0	0	0
NC_022541	64969	TGGACGCAAT.CGCCGACTAC	C	T	40	PASS	NA	GT	0	1	1	1	1	1	1	1	1	0	1	1	1	1	1	0	1	1	1	1	1	1	1	0	1	1	1	1	1	1	1	1	1	1	1	1	1	1	1	1	1
NC_022541	64972	ACGCAATCGC.CGACTACATC	C	G	40	PASS	NA	GT	0	0	0	0	0	0	0	0	0	0	0	0	0	0	0	0	0	0	0	0	0	0	0	0	0	0	0	0	0	0	0	0	0	0	0	0	0	0	0	0	0
NC_022541	64976	AATCGCCGAC.TACATCGCAA	T	G	40	PASS	NA	GT	0	1	0	0	0	0	0	0	0	0	0	0	0	0	0	0	0	0	0	0	0	0	0	0	0	0	0	0	0	0	0	0	0	0	0	0	0	0	0	0	0
NC_022541	64980	GCCGACTACA.TCGCAATCGA	T	C	40	PASS	NA	GT	0	0	0	0	0	0	0	0	0	0	0	0	0	0	0	0	0	0	0	0	0	0	0	0	0	0	0	0	0	0	0	0	0	0	0	0	0	0	0	0	0
NC_022541	64987	ACATCGCAAT.CGATAACGCA	C	T	40	PASS	NA	GT	0	0	0	0	0	0	0	0	0	0	0	0	0	0	0	0	0	0	0	0	0	0	0	0	0	0	0	0	0	0	0	0	0	0	0	0	0	0	0	0	0
NC_022541	64990	TCGCAATCGA.TAACGCACCC	T	C	40	PASS	NA	GT	0	0	0	0	0	0	0	0	0	0	0	0	0	0	0	0	0	0	0	0	0	0	0	0	0	0	0	0	0	0	0	0	0	0	0	0	0	0	0	0	0
NC_022541	64996	TCGATAACGC.ACCCGCTGCA	A	G	40	PASS	NA	GT	0	0	0	0	0	0	0	0	0	0	0	0	0	0	0	0	0	0	0	0	0	0	0	0	0	0	0	0	0	0	0	0	0	0	0	0	0	0	0	0	0
NC_022541	65006	ACCCGCTGCA.GCGGCGCTGG	G	A	40	PASS	NA	GT	0	0	0	0	0	0	0	0	0	0	0	0	0	0	0	0	0	0	0	0	0	0	0	0	0	0	0	0	0	0	0	0	0	0	0	0	0	0	0	0	0
NC_022541	65011	CTGCAGCGGC.GCTGGTGAAA	G	A	40	PASS	NA	GT	0	0	0	0	0	0	0	0	0	0	0	0	0	0	0	0	0	0	0	0	0	0	0	0	0	0	0	0	0	0	0	0	0	0	0	0	0	0	0	0	0
NC_022541	65013	GCAGCGGCGC.TGGTGAAACG	T	G	40	PASS	NA	GT	0	0	1	1	1	1	1	0	0	0	1	0	0	1	0	0	1	0	0	1	1	1	0	0	1	1	1	0	0	0	0	0	0	1	1	1	1	0	0	0	0
NC_022541	65017	CGGCGCTGGT.GAAACGGGTG	G	C	40	PASS	NA	GT	0	1	0	0	0	0	0	0	0	0	0	0	0	0	0	0	0	0	0	0	0	0	0	0	0	0	0	0	0	0	0	0	0	0	0	0	0	0	0	0	0
NC_022541	65021	GCTGGTGAAA.CGGGTGTTCG	C	T	40	PASS	NA	GT	0	1	0	0	0	0	0	0	0	0	0	0	0	0	0	0	0	0	0	0	0	0	0	0	0	0	0	0	0	0	0	0	0	0	0	0	0	0	0	0	0
NC_022541	65029	AACGGGTGTT.CGCGCACGTT	C	G	40	PASS	NA	GT	0	1	0	0	0	0	0	0	0	0	0	0	0	0	0	0	0	0	0	0	0	0	0	0	0	0	0	0	0	0	0	0	0	0	0	0	0	0	0	0	0
NC_022541	65030	ACGGGTGTTC.GCGCACGTTG	G	C	40	PASS	NA	GT	0	1	0	0	0	0	0	0	0	0	0	0	0	0	0	0	0	0	0	0	0	0	0	0	0	0	0	0	0	0	0	0	0	0	0	0	0	0	0	0	0
NC_022541	65031	CGGGTGTTCG.CGCACGTTGA	C	G	40	PASS	NA	GT	0	0	0	0	0	0	0	1	1	0	0	1	1	0	1	0	0	0	1	0	0	0	1	0	0	0	0	1	1	1	1	1	1	0	0	0	0	1	1	1	1
NC_022541	65035	TGTTCGCGCA.CGTTGAGCAA	C	G	40	PASS	NA	GT	0	1	1	1	1	1	1	0	0	0	1	0	0	1	0	0	1	0	0	1	1	1	0	0	1	1	1	0	0	0	0	0	0	1	1	1	1	0	0	0	0
NC_022541	65038	TCGCGCACGT.TGAGCAATTG	T	C	40	PASS	NA	GT	0	1	0	0	0	0	0	0	0	0	0	0	0	0	0	0	0	0	0	0	0	0	0	0	0	0	0	0	0	0	0	0	0	0	0	0	0	0	0	0	0
NC_022541	65043	CACGTTGAGC.AATTGATCGA	A	G	40	PASS	NA	GT	0	1	0	0	0	0	0	0	0	0	0	0	0	0	0	0	0	0	0	0	0	0	0	0	0	0	1	0	0	0	0	0	0	0	0	0	0	0	0	0	0
NC_022541	65047	TTGAGCAATT.GATCGAACGC	G	A	40	PASS	NA	GT	0	0	1	1	1	1	1	0	0	0	1	0	0	1	0	0	1	0	0	1	1	1	0	0	1	1	1	0	0	0	0	0	0	1	1	1	1	0	0	0	0
NC_022541	65050	AGCAATTGAT.CGAACGCCCG	C	T	40	PASS	NA	GT	0	1	0	0	0	0	0	0	0	0	0	0	0	0	0	0	0	0	0	0	0	0	0	0	0	0	0	0	0	0	0	0	0	0	0	0	0	0	0	0	0
NC_022541	65055	TTGATCGAAC.GCCCGGACAG	G	A	40	PASS	NA	GT	0	1	0	0	0	0	0	1	1	0	0	1	1	0	1	0	0	1	1	0	0	0	1	0	0	0	0	1	1	1	1	1	1	0	0	0	0	1	1	1	1
NC_022541	65056	TGATCGAACG.CCCGGACAGC	C	T	40	PASS	NA	GT	0	0	0	0	0	0	0	0	0	0	0	0	0	0	0	0	0	0	0	0	0	0	0	0	0	0	0	0	0	0	0	0	0	0	0	0	0	0	0	0	0
NC_022541	65058	ATCGAACGCC.CGGACAGCGG	C	A	40	PASS	NA	GT	0	0	0	0	0	0	0	0	0	0	0	0	0	0	0	0	0	0	0	0	0	0	0	0	0	0	0	0	0	0	0	0	0	0	0	0	0	0	0	0	0
NC_022541	65059	TCGAACGCCC.GGACAGCGGA	G	C	40	PASS	NA	GT	0	0	0	0	0	0	0	0	0	0	0	0	0	0	0	0	0	0	0	0	0	0	0	0	0	0	0	0	0	0	0	0	0	0	0	0	0	0	0	0	0
NC_022541	65063	ACGCCCGGAC.AGCGGAAGCC	A	C	40	PASS	NA	GT	0	0	1	1	1	1	1	0	0	0	1	0	0	1	0	0	1	0	0	1	1	1	0	0	1	1	1	0	0	0	0	0	0	1	1	1	1	0	0	0	0
NC_022541	65074	GCGGAAGCCG.GCCACAGGAA	G	A	40	PASS	NA	GT	0	0	0	0	0	0	0	1	1	0	0	0	0	0	1	0	0	0	1	0	0	0	1	0	0	0	0	1	1	1	1	1	1	0	0	0	0	1	1	1	1
NC_022541	65077	GAAGCCGGCC.ACAGGAACTC	A	G	40	PASS	NA	GT	0	0	1	1	1	1	1	0	0	0	1	0	0	1	0	0	1	0	0	1	1	1	0	0	1	1	1	0	0	0	0	0	0	1	1	1	1	0	0	0	0
NC_022541	65087	ACAGGAACTC.AAGCGCTCGC	A	C	40	PASS	NA	GT	0	1	0	0	0	0	0	0	0	0	0	0	0	0	0	0	0	0	0	0	0	0	0	0	0	0	0	0	0	0	0	0	0	0	0	0	0	0	0	0	0
NC_022541	65088	CAGGAACTCA.AGCGCTCGCG	A	C	40	PASS	NA	GT	0	0	1	1	1	1	1	0	0	0	1	0	0	1	0	0	1	0	0	1	1	1	0	0	1	1	1	0	0	0	0	0	0	1	1	1	1	0	0	0	0
NC_022541	65093	ACTCAAGCGC.TCGCGCTATC	T	C	40	PASS	NA	GT	0	0	1	1	1	1	1	0	0	0	1	0	0	1	0	0	1	0	0	1	1	1	0	0	1	1	1	0	0	0	0	0	0	1	1	1	1	0	0	0	0
NC_022541	65096	CAAGCGCTCG.CGCTATCGCC	C	A	40	PASS	NA	GT	0	0	1	1	1	1	1	0	0	0	1	0	0	1	0	0	1	0	0	1	1	1	0	0	1	1	1	0	0	0	0	0	0	1	1	1	1	0	0	0	0
NC_022541	65107	GCTATCGCCA.GATTGTCGAA	G	A	40	PASS	NA	GT	0	0	0	0	0	0	0	0	0	0	0	0	0	0	0	0	0	0	0	0	0	0	0	0	0	0	0	0	0	0	0	0	0	0	0	0	0	0	0	0	0
NC_022541	65126	ACCACCTTGC.CGCGTGTTCT	C	G	40	PASS	NA	GT	0	0	0	0	0	0	0	0	0	0	0	0	0	0	0	0	0	0	0	0	0	0	0	0	0	0	0	0	0	0	0	0	0	0	0	0	0	0	0	0	0
NC_022541	75313	GCTGGCGTAG.TTGGCGGGGC	T	C	40	PASS	NA	GT	0	0	0	0	0	0	0	0	0	0	0	0	0	0	0	0	0	0	0	0	0	0	0	0	0	0	0	0	0	0	0	0	0	0	0	0	0	0	0	0	0
NC_022541	75317	GCGTAGTTGG.CGGGGCTGCT	C	T	40	PASS	NA	GT	0	0	0	0	0	0	0	0	0	0	0	0	0	0	0	0	0	0	0	0	0	0	0	0	0	0	0	0	0	0	0	0	0	0	0	0	0	0	0	0	0
NC_022541	75319	GTAGTTGGCG.GGGCTGCTCC	G	A	40	PASS	NA	GT	0	0	0	0	0	0	0	0	0	0	0	0	0	1	0	0	0	0	0	0	0	0	0	0	0	0	0	0	0	0	0	0	0	0	0	0	0	0	0	0	0
NC_022541	75320	TAGTTGGCGG.GGCTGCTCCA	G	T	40	PASS	NA	GT	0	1	1	1	1	1	1	0	0	0	1	0	0	1	0	0	1	0	0	1	1	1	0	0	1	1	1	0	0	0	0	0	0	1	1	1	1	0	0	0	0
NC_022541	75321	AGTTGGCGGG.GCTGCTCCAA	G	A	40	PASS	NA	GT	0	1	0	0	0	0	0	0	0	0	0	0	0	0	0	0	0	0	0	0	0	0	0	0	0	0	0	0	0	0	0	0	0	0	0	0	0	0	0	0	0
NC_022541	75324	TGGCGGGGCT.GCTCCAACGG	G	A	40	PASS	NA	GT	0	0	0	0	0	0	0	0	0	0	0	0	0	0	0	0	0	1	0	0	0	0	0	0	0	0	0	0	0	0	0	0	0	0	0	0	0	0	0	0	0
NC_022541	75336	TCCAACGGTC.CGGCCAGGTG	C	T	40	PASS	NA	GT	0	0	0	0	0	0	0	0	0	0	0	0	0	0	0	0	0	0	0	0	0	0	0	0	0	0	0	0	0	0	0	0	0	0	0	0	0	0	0	0	0
NC_022541	75357	GCACGGCTGC.TGCATACCAC	T	G,C	40	PASS	NA	GT	0	1	1	1	1	1	1	2	2	0	1	2	2	1	2	0	1	2	2	1	1	1	2	0	1	1	1	2	2	2	2	2	2	1	1	1	1	2	2	2	2
NC_022541	75372	ACCACTCGAC.TGCCTCCTGC	T	C	40	PASS	NA	GT	0	1	1	1	1	1	1	1	1	0	1	1	1	1	1	0	1	1	1	1	1	1	1	0	1	1	1	1	1	1	1	1	1	1	1	1	1	1	1	1	1
NC_022541	75387	CCTGCTTGCG.CCCGGCGCGC	C	T	40	PASS	NA	GT	0	1	0	0	0	0	0	0	0	0	0	0	0	0	0	0	0	0	0	0	0	0	0	0	0	0	0	0	0	0	0	0	0	0	0	0	0	0	0	0	0
NC_022541	75393	TGCGCCCGGC.GCGCCAGAGC	G	A	40	PASS	NA	GT	0	0	1	1	1	1	1	0	0	0	1	0	0	1	0	0	1	0	0	1	1	1	0	0	1	1	1	0	0	0	0	0	0	1	1	1	1	0	0	0	0
NC_022541	75399	CGGCGCGCCA.GAGCGCCAGT	G	A	40	PASS	NA	GT	0	0	0	0	0	0	0	1	1	0	0	1	1	0	1	0	0	1	1	0	0	0	1	0	0	0	0	1	1	1	1	1	1	0	0	0	0	1	1	1	1
NC_022541	75420	CAGCCGTGGT.TGGCAGCCAT	T	C	40	PASS	NA	GT	0	1	0	0	0	0	0	0	0	0	0	0	0	0	0	0	0	0	0	0	0	0	0	0	0	0	0	0	0	0	0	0	1	0	0	0	0	0	0	0	0
NC_022541	75438	ATTCCGGCGT.GGCCGGACGG	G	A	40	PASS	NA	GT	0	0	0	0	0	0	0	0	0	0	0	0	0	0	0	0	0	0	0	0	0	0	0	0	0	0	0	0	0	0	0	0	0	0	0	0	0	0	0	0	0
NC_022541	75449	GCCGGACGGC.CATTGGCCAG	C	G	40	PASS	NA	GT	0	0	0	0	0	0	0	0	0	0	0	0	0	0	0	0	0	0	0	0	0	0	0	0	0	0	0	0	0	0	1	0	0	0	0	0	0	0	0	0	0
NC_022541	75450	CCGGACGGCC.ATTGGCCAGA	A	G	40	PASS	NA	GT	0	0	0	0	0	0	0	0	0	0	0	0	0	0	0	0	0	0	0	0	0	0	0	0	0	0	0	0	0	0	0	0	0	0	0	0	0	0	0	0	0
NC_022541	75458	CCATTGGCCA.GAGTGGCCCA	G	A	40	PASS	NA	GT	0	0	1	1	1	1	1	0	0	0	1	0	0	0	0	0	1	0	0	1	1	1	0	0	1	1	0	0	0	0	0	0	1	1	1	0	1	0	0	0	0
NC_022541	75459	CATTGGCCAG.AGTGGCCCAT	A	G	40	PASS	NA	GT	0	1	1	1	1	1	1	0	0	0	1	0	0	1	0	0	1	0	0	1	1	1	0	0	1	1	1	0	0	0	0	0	0	1	1	1	1	0	0	0	0
NC_022541	75460	ATTGGCCAGA.GTGGCCCATT	G	T	40	PASS	NA	GT	0	1	1	1	1	1	1	1	1	0	1	1	1	1	1	0	1	1	1	1	1	1	1	0	1	1	1	1	1	1	1	1	1	1	1	1	1	1	1	1	1
NC_022541	75477	ATTGCTGCAG.CGCCTTGTCG	C	T	40	PASS	NA	GT	0	0	0	0	0	0	0	1	1	0	0	1	1	0	1	0	0	1	1	0	0	0	1	0	0	0	0	1	1	1	1	1	1	0	0	0	0	1	1	1	1
NC_022541	75513	GCAGGTCCCA.CCCATAGTTC	C	T	40	PASS	NA	GT	0	1	0	0	0	0	0	0	0	0	0	0	0	0	0	0	0	0	0	0	0	0	0	0	0	0	0	0	0	0	0	0	0	0	0	0	0	0	0	0	0
NC_022541	75552	GCTGGCTGCC.GTTGGAGACC	G	T	40	PASS	NA	GT	0	0	0	0	0	0	0	0	0	0	0	0	0	0	0	0	0	0	0	0	0	0	0	0	0	0	0	0	0	0	0	0	0	0	0	0	0	0	0	0	0
NC_022541	75558	TGCCGTTGGA.GACCAGCGCC	G	C	40	PASS	NA	GT	0	0	0	0	0	0	0	0	0	0	0	0	0	0	0	0	0	0	0	0	0	0	0	0	0	0	0	0	0	0	0	0	0	0	0	0	0	0	0	0	0
NC_022541	75569	ACCAGCGCCA.GCGCGCCCTG	G	A	40	PASS	NA	GT	0	0	1	1	1	1	1	0	0	0	1	0	0	0	0	0	1	0	0	1	1	1	0	0	1	1	0	0	0	0	0	0	0	1	1	0	1	0	0	0	0
NC_022541	75596	TCATCGCCCA.GCTGGGTGCG	G	A	40	PASS	NA	GT	0	1	1	1	1	1	1	1	1	0	1	1	1	1	1	0	1	1	1	1	1	1	1	0	1	1	1	1	1	1	1	1	1	1	1	1	1	1	1	1	1
NC_022541	75602	CCCAGCTGGG.TGCGCCCACC	T	C	40	PASS	NA	GT	0	0	0	0	0	0	0	0	0	0	0	1	1	0	0	0	0	0	0	0	0	0	0	0	0	0	0	0	0	0	0	0	0	0	0	0	0	0	0	0	0
NC_022541	75603	CCAGCTGGGT.GCGCCCACCG	G	A	40	PASS	NA	GT	0	0	0	0	0	0	0	1	1	0	0	1	1	0	1	0	0	1	1	0	0	0	1	0	0	0	0	1	1	1	1	1	1	0	0	0	0	1	1	1	1
NC_022541	75609	GGGTGCGCCC.ACCGGCGTAG	A	G	40	PASS	NA	GT	0	0	1	1	1	1	1	0	0	0	1	0	0	1	0	0	1	0	0	1	1	1	0	0	1	1	1	0	0	0	0	0	0	1	1	1	1	0	0	0	0
NC_022541	75612	TGCGCCCACC.GGCGTAGGCC	G	C	40	PASS	NA	GT	0	0	1	1	1	1	1	0	0	0	1	0	0	1	0	0	1	0	0	1	1	1	0	0	1	1	1	0	0	0	0	0	0	1	1	1	1	0	0	0	0
NC_022541	75615	GCCCACCGGC.GTAGGCCAGC	G	A	40	PASS	NA	GT	0	0	1	1	1	1	1	0	0	0	1	0	0	1	0	0	1	0	0	1	1	1	0	0	1	1	1	0	0	0	0	0	0	1	1	1	1	0	0	0	0
NC_022541	75618	CACCGGCGTA.GGCCAGCGCC	G	A	40	PASS	NA	GT	0	0	1	1	1	1	1	0	0	0	1	0	0	1	0	0	1	0	0	1	1	1	0	0	1	1	1	0	0	0	0	0	0	1	1	1	1	0	0	0	0
NC_022541	75627	AGGCCAGCGC.CGCCAACTGC	C	T	40	PASS	NA	GT	0	0	1	1	1	1	1	0	0	0	1	0	0	0	0	0	1	0	0	1	1	1	0	0	1	1	0	0	0	0	0	0	0	1	1	0	1	0	0	0	0
NC_022541	75642	ACTGCGCGCG.TGGATCGGCC	T	C	40	PASS	NA	GT	0	1	1	1	1	1	1	0	0	0	1	0	0	1	0	0	1	0	0	1	1	1	0	0	1	1	1	0	0	0	0	0	0	1	1	1	1	0	0	0	0
NC_022541	75645	GCGCGCGTGG.ATCGGCCGCG	A	G	40	PASS	NA	GT	0	1	0	0	0	0	0	0	0	0	0	0	0	0	0	0	0	0	0	0	0	0	0	0	0	0	0	0	0	0	0	0	0	0	0	0	0	0	0	0	0
NC_022541	75654	GATCGGCCGC.GCGCGCGTCA	G	A	40	PASS	NA	GT	0	0	1	1	1	1	1	0	0	0	1	0	0	1	0	0	1	0	0	1	1	1	0	0	1	1	1	0	0	0	0	0	0	1	1	1	1	0	0	0	0
NC_022541	75657	CGGCCGCGCG.CGCGTCACGC	C	G	40	PASS	NA	GT	0	1	0	0	0	0	0	0	0	0	0	0	0	0	0	0	0	0	0	0	0	0	0	0	0	0	0	0	0	0	0	0	0	0	0	0	0	0	0	0	0
NC_022541	75663	CGCGCGCGTC.ACGCTGCACC	A	C,G	40	PASS	NA	GT	0	0	1	1	1	1	1	0	0	0	1	0	0	2	0	0	1	0	0	1	1	1	0	0	1	1	2	0	0	0	0	0	0	1	1	2	1	0	0	0	0
NC_022541	75666	GCGCGTCACG.CTGCACCATC	C	T	40	PASS	NA	GT	0	1	1	1	1	1	1	1	1	0	1	1	1	1	1	0	1	1	1	1	1	1	1	0	1	1	1	1	1	1	1	1	1	1	1	1	1	1	1	1	1
NC_022541	75671	TCACGCTGCA.CCATCGCCGC	C	A	40	PASS	NA	GT	0	0	0	0	0	0	0	0	0	0	0	0	0	0	0	0	0	0	0	0	0	0	0	0	0	0	0	0	0	0	0	0	0	0	0	0	0	0	0	0	0
NC_022541	75693	GCCGGTCGAC.GACTGCATCG	G	C	40	PASS	NA	GT	0	0	0	0	0	0	0	0	0	0	0	0	0	0	0	0	0	0	0	0	0	0	0	0	0	0	0	0	0	0	0	0	0	0	0	0	0	0	0	0	0
NC_022541	75711	CGCCCTGGCC.TTGTACGGCC	T	C	40	PASS	NA	GT	0	1	1	1	1	1	1	0	0	0	1	0	0	1	0	0	1	0	0	1	1	1	0	0	1	1	1	0	0	0	0	0	0	1	1	1	1	0	0	0	0
NC_022541	75723	GTACGGCCAC.CACGGCCTTG	C	A	40	PASS	NA	GT	0	0	0	0	0	0	0	0	0	0	0	0	0	0	0	0	0	0	0	0	0	0	0	0	0	0	0	0	0	0	0	0	0	0	0	0	0	0	0	0	0
NC_022541	75726	CGGCCACCAC.GGCCTTGGTG	G	C	40	PASS	NA	GT	0	0	0	0	0	0	0	1	1	0	0	1	1	0	1	0	0	1	1	0	0	0	1	0	0	0	0	1	1	1	1	1	1	0	0	0	0	1	1	1	1
NC_022541	75734	ACGGCCTTGG.TGGTACCGCG	T	C	40	PASS	NA	GT	0	0	0	0	0	0	0	0	0	0	0	0	1	0	0	0	0	0	0	0	0	0	0	0	0	0	0	0	0	0	0	0	0	0	0	0	0	0	0	0	0
NC_022541	75740	TTGGTGGTAC.CGCGGTCTTC	C	T	40	PASS	NA	GT	0	0	0	0	0	0	0	1	1	0	0	1	1	0	1	0	0	1	1	0	0	0	1	0	0	0	0	1	1	1	1	1	1	0	0	0	0	1	1	1	1
NC_022541	75744	TGGTACCGCG.GTCTTCGTCG	G	A	40	PASS	NA	GT	0	0	0	0	0	0	0	0	0	0	0	0	0	1	0	0	0	0	0	0	0	0	0	0	0	0	1	0	0	0	0	0	0	0	0	1	0	0	0	0	0
NC_022541	75805	CAACGACCAC.ACCCCTCCGA	A	C	40	PASS	NA	GT	0	0	0	0	0	0	0	0	0	0	0	0	0	0	0	0	0	0	0	0	0	0	0	0	0	0	0	0	0	0	0	0	0	0	0	0	0	0	0	0	0
NC_022541	75843	ACGCGTATTT.CCTTTTCACT	C	T	40	PASS	NA	GT	0	0	0	0	0	0	0	0	0	0	0	0	0	0	0	0	0	0	0	0	0	0	0	0	0	0	0	0	0	0	0	0	0	0	0	0	0	0	0	0	0
NC_022541	75875	GACAGCAAAC.GACCCCTTCC	G	A	40	PASS	NA	GT	0	0	0	0	0	0	0	0	0	0	0	0	1	0	0	0	0	0	0	0	0	0	0	0	0	0	0	0	0	0	0	0	0	0	0	0	0	0	0	0	0
NC_022541	75876	ACAGCAAACG.ACCCCTTCCC	A	C	40	PASS	NA	GT	0	0	0	0	0	0	0	0	0	0	0	0	0	0	0	0	0	0	0	0	0	0	0	0	0	0	0	0	0	0	0	0	0	0	0	0	0	0	0	0	0
[truncated: 133,327 more rows]
[truncated: 119 more columns]
