# Supplementary material for: Genome sequencing reveals a new lineage associated with lablab bean and genetic exchange between Xanthomonas axonopodis pv. phaseoli and Xanthomonas fuscans subsp. fuscans
Source: Front Microbiol. 2015 Oct 7;6:1080. doi: 10.3389/fmicb.2015.01080 (PMC4595841; doi:10.3389/fmicb.2015.01080)
Supplement: Supplementary file 3 [file TableS1.XLSX]

## Sheet: Sheet1
Supplementary Table S1. Summary statistics for the de novo genome assemblies.
All statistics are based on contigs of size >= 500 bp, unless otherwise noted (e.g., "# contigs (>= 0 bp)" and "Total length (>= 0 bp)" include all contigs).
Assembly (present study)	# contigs (>= 0 bp)	# contigs (>= 1000 bp)	Total length (>= 0 bp)	Total length (>= 1000 bp)	# contigs	Largest contig	total length	G+C (%)	N50	N75	L50	L75	# N's per 100 kbp
NCPPB2064 GCA_000786995.2	139	139	5250852	5250852	139	327351	5250852	64.55	123606	52900	15	33	0
NCPPB557 GCA_000808655.2	143	143	5226308	5226308	143	326992	5226308	64.55	116632	47769	16	33	0
NCPPB1128	71	71	4950425	4950425	71	475671	4950425	68.89	107247	74331	14	27	0
NCPPB1713 GCA_000807875.2	144	144	5291882	5291882	144	356409	5291882	64.61	96285	52695	19	38	0
NCPPB1159 GCA_000266285.1	128	128	4797980	4797980	128	257906	4797980	65.18	96063	46574	17	36	0
NCPPB1654 GCA_000775185.2	134	134	5032953	5032953	134	367357	5032953	64.76	81530	40461	16	38	0
NCPPB1680 GCA_000808695.2	158	158	5117812	5117812	158	224929	5117812	64.9	77618	47328	24	45	0
NCPPB1420 GCA_000785935.2	165	165	5174926	5174926	165	224974	5174926	64.86	76066	42067	23	46	0
NCPPB1056 GCA_000786945.2	134	134	5150070	5150070	134	233487	5150070	64.77	75549	44652	20	42	0
NCPPB381 GCA_000788075.2	136	136	4955361	4955361	136	231088	4955361	64.89	74010	38888	21	43	0
NCPPB1433 GCA_000775215.2	154	154	5044382	5044382	154	285554	5044382	64.76	73844	39479	20	43	0
NCPPB1158 GCA_000775205.2	152	152	5109687	5109687	152	231811	5109687	64.77	73833	40466	22	45	0
NCPPB3660 GCA_000786925.2	183	183	5153912	5153912	183	322254	5153912	64.67	73151	34867	23	47	0
NCPPB670 GCA_000764875.2	152	152	5233004	5233004	152	201426	5233004	64.68	71533	38197	22	48	0
NCPPB1058 GCA_000786935.2	168	168	5180142	5180142	168	324288	5180142	64.7	71334	35921	25	49	0
NCPPB2665 GCA_000775195.2	154	154	5092836	5092836	154	319856	5092836	64.72	71115	34305	19	45	0
NCPPB1495 GCA_000786915.2	158	158	5197608	5197608	158	194645	5197608	64.64	70760	36664	24	50	0
X621 GCA_000817715.2	165	165	5017028	5017028	165	177805	5017028	64.8	70719	36776	26	50	0
NCPPB1646 GCA_000785925.2	162	162	5088301	5088301	162	192582	5088301	64.92	69783	45187	24	47	0
NCPPB1811 GCA_000808675.2	170	170	5202962	5202962	170	225593	5202962	64.71	68458	36539	26	51	0
NCPPB301 GCA_000785945.2	153	153	5047533	5047533	153	192590	5047533	64.95	67789	45183	25	48	0
XCP123 GCA_000827975.2	169	169	5153892	5153892	169	220101	5153892	64.84	66622	44427	25	49	0
NCPPB1138 GCA_000808735.2	183	183	5297689	5297689	183	155087	5297689	64.78	66168	35704	26	53	0
NCPPB220 GCA_000808715.2	191	191	5364294	5364294	191	151739	5364294	64.61	61941	40326	30	56	0
X631 GCA_000827985.2	189	189	5152698	5152698	189	321888	5152698	64.7	61459	31722	26	55	0
NCPPB3035 GCA_000774035.2	190	190	5225427	5225427	190	151633	5225427	64.74	59899	34433	28	56	0
NCPPB556 GCA_000818835.2	288	288	5191650	5191650	288	166874	5191650	64.58	41494	18726	38	88	0
NCPPB1402 GCA_000774025.2	240	240	5342561	5342561	240	113545	5342561	64.68	39404	20951	43	89	0
Assembly (from Bart et. al, 2012)	# contigs (>= 0	bp) # contigs (>= 1000 bp)	Total length (>= 0 bp)	Total length (>= 1000 bp)	# contigs	Largest contig	Total length	GC (%)	N50	N75	L50	L75	# N's per 100 kbp
IBSBF1411	130	130	4856132	4856132	130	314799	4856132	65.17	111064	48882	15	32	0
IBSBF2346	122	122	4874593	4874593	122	257932	4874593	65.17	104783	49501	18	36	0
CFBP1851	123	123	4798436	4798436	123	281156	4798436	65.18	96104	47325	17	34	0
NCPPB1159	128	128	4797980	4797980	128	257906	4797980	65.18	96063	46574	17	36	0
IBSBF2672	131	130	4856510	4855603	131	257571	4856510	65.16	95444	45918	18	37	0
IBSBF356	130	130	4847079	4847079	130	257951	4847079	65.15	95113	53403	18	35	0
IBSBF2345	128	125	4819772	4816940	128	286963	4819772	65.23	94514	49498	19	36	0
IBSBF320	121	121	4803726	4803726	121	257673	4803726	65.19	94274	49412	17	36	0
UA226	129	129	4951862	4951862	129	290136	4951862	65	88566	49656	18	38	0
IBSBF2820	150	150	4930429	4930429	150	257651	4930429	65.11	88415	42506	19	40	0
IBSBF278	138	138	5020210	5020210	138	239334	5020210	64.89	88339	44175	20	41	0
IBSBF436	149	149	4903327	4903327	149	257580	4903327	65.15	83955	44597	19	39	0
IBSBF2670	139	139	4902902	4902902	139	280128	4902902	65.13	83729	44599	17	36	0
UA324	146	146	4916013	4916013	146	161357	4916013	65.09	77947	42353	22	44	0
IBSBF725	141	141	4886517	4886517	141	257945	4886517	65.15	77096	46873	19	40	0
IBSBF2667	138	138	4913060	4913060	138	226291	4913060	65.13	76506	47304	21	41	0
Xam669	137	137	4820297	4820297	137	201435	4820297	65.21	75427	42095	21	43	0
UG27	131	131	4903342	4903342	131	268832	4903342	65.06	74810	44155	19	39	0.02
UG24	145	144	4909909	4908917	145	233940	4909909	65.04	74286	43883	20	41	0.02
IBSBF285	147	146	4972047	4971114	147	186156	4972047	65.01	73562	44189	21	43	0.02
IBSBF2816	145	144	4902619	4901640	145	256960	4902619	65.12	73453	44328	19	39	0
IBSBF726	140	137	4832905	4829984	140	257968	4832905	65.18	72346	42156	21	42	0
UG21	148	148	5010468	5010468	148	237252	5010468	65.06	71375	39255	23	47	0
ORSTX27	133	133	4931909	4931909	133	237243	4931909	65.07	71296	46296	21	42	0
UA536	142	142	4866301	4866301	142	183757	4866301	65.13	71281	41126	23	45	0
UA303	130	130	4872968	4872968	130	196821	4872968	65.13	71242	47435	23	44	0
IBSBF2821	161	161	4906958	4906958	161	257592	4906958	65.13	71007	39076	21	44	0
UG23	133	133	4924062	4924062	133	237150	4924062	65.01	70618	47595	22	43	0
AT6B	163	163	4946093	4946093	163	237170	4946093	65.01	69689	34822	22	47	0
UA306	144	144	5065231	5065231	144	235368	5065231	65.01	69670	43868	23	45	0.02
ORST17	177	173	5128104	5124410	177	235384	5128104	64.95	69510	43949	23	45	0
UA686	143	143	4898003	4898003	143	196787	4898003	65.11	69477	45639	22	43	0
UG51	140	140	4871289	4871289	140	234400	4871289	65.13	69454	42988	22	44	0
UA323	151	151	4872007	4872007	151	173776	4872007	65.13	69452	41593	23	45	0
IBSBF289	155	155	4847529	4847529	155	226288	4847529	65.14	69253	35540	23	46	0
CIO151	175	175	4911246	4911246	175	150154	4911246	65.06	69224	32613	24	48	0
UG43	145	145	4924182	4924182	145	237167	4924182	65.02	66987	40722	23	46	0
UG44	141	141	4895442	4895442	141	238358	4895442	65.07	66986	41043	24	47	0
IBSBF2818	139	139	4851686	4851686	139	235402	4851686	65.15	66984	43073	22	44	0
UA556	139	139	4842655	4842655	139	237273	4842655	65.14	66984	43073	22	44	0
IBSBF2539	138	137	4952612	4951657	138	196970	4952612	65.07	66819	43320	24	48	0
AFNC1360	149	149	4921075	4921075	149	235381	4921075	65.07	65052	42988	25	48	0
Xam672	165	165	5016075	5016075	165	239253	5016075	64.89	63368	32768	25	52	0
UA560	154	154	4897922	4897922	154	176262	4897922	65.1	61397	39165	27	52	0
Xam1134	158	158	4894844	4894844	158	237227	4894844	65.09	58567	37574	28	53	0
Xam668	195	195	4954860	4954860	195	276859	4954860	64.92	46240	27846	29	63	0
Xam678	256	256	4894142	4894142	256	104760	4894142	65.1	38200	17862	47	93	0
IBSBF2666	311	311	4842277	4842277	311	123056	4842277	65.1	28335	15839	49	105	0
IBSBF2673	305	305	4830620	4830620	305	120981	4830620	65.12	27765	16026	53	109	0
UG45	323	323	4986397	4986397	323	83811	4986397	64.89	25647	14923	59	123	0
Thaiassembly.fna broken	324	322	4874623	4872860	324	84544	4874623	65.16	25423	14825	62	124	0
IBSBF2665	434	434	4836797	4836797	434	111173	4836797	65.14	17985	10227	83	172	0
IBSBF2822	464	463	4831349	4830360	464	57666	4831349	65.13	17213	9515	93	188	0
IBSBF2819	557	557	4852810	4852810	557	59730	4852810	65.12	13719	7675	104	224	0
IBSBF2538	573	573	4833429	4833429	573	50456	4833429	65.1	12527	7291	122	249	0
IBSBF1182	648	646	4773692	4771727	648	46493	4773692	65.04	11601	6560	128	261	0
UG28	676	672	4722734	4719002	676	54751	4722734	65.14	10796	6238	131	276	0
IBSBF614	706	706	4730788	4730788	706	51491	4730788	65.03	10598	5680	136	291	0
IBSBF1994	677	674	4774518	4771587	677	45564	4774518	65.08	10370	6007	137	287	0
NG1	785	784	4737721	4736722	785	38252	4737721	64.9	9229	5016	160	335	0
ORST4	767	766	4650210	4649231	767	36169	4650210	65.03	9012	4950	161	336	0
IBSBF280	850	848	4842752	4840771	850	41005	4842752	64.81	8666	4696	171	358	0
IBSBF321	888	883	4593056	4588103	888	35503	4593056	64.9	7483	4318	183	389	0
