# Supplementary material for: Genome sequencing reveals a new lineage associated with lablab bean and genetic exchange between Xanthomonas axonopodis pv. phaseoli and Xanthomonas fuscans subsp. fuscans
Source: Front Microbiol. 2015 Oct 7;6:1080. doi: 10.3389/fmicb.2015.01080 (PMC4595841; doi:10.3389/fmicb.2015.01080)
Supplement: Supplementary file 4 [file TablesS2-S7.XLSX]

## Sheet: Xff
Table S2. Genes found in Xff but absent from Xap GL1 and lablab-associated Xap.
Each of these genes was covered over at least 95% of its length by sequence reads from each of the sequenced Xff genomes but covered by no more than 30% of its length by aligned reads from any of the Xap genomes.
Breadth of coverage was based on alignments of the genomic sequences reads against the reference pan-genome using BWA-MEM.
Accession	Description
KGK64681	fimbrial protein
KGT57443	hypothetical protein
KGU47595.1	hypothetical protein
KGU48127.1	hypothetical protein
KGU49471.1	hypothetical protein
KGU50252.1	fimbrial protein
KGU50381.1	NADPH:quinone oxidoreductase
KGU50382.1	AraC family transcriptional regulator
KGU50383.1	N-ethylmaleimide reductase
KGU50384.1	TetR family transcriptional regulator
KGU50385.1	short-chain dehydrogenase
KGU50807.1	glyoxalase
KGU50814.1	hypothetical protein
KGU50868.1	hypothetical protein
KGU50875.1	methyltransferase
KGU50876.2	hypothetical protein
KGU51538.1	membrane protein
KGU51543.1	hypothetical protein
KGU51683.1	modification methylase
KGU51684.1	hypothetical protein
KGU51685.1	hypothetical protein
KGU51686.1	hypothetical protein
KGU51744.1	hypothetical protein
KGU52010.1	alpha/beta hydrolase
KGU52011.1	LysR family transcriptional regulator
KGU52012.1	FMN-dependent NADH-azoreductase
KGU52013.1	hypothetical protein
KGU52019.1	hypothetical protein
KGU52023.1	hypothetical protein
KGU52101.1	hypothetical protein
KGU52102.1	hypothetical protein
KGU52107.1	hypothetical protein
KGU52614.1	hypothetical protein
KGU52669.1	hypothetical protein
KGU52846.1	beta-lactamase
KGU52847.1	transcriptional regulator
KGU53094.1	hypothetical protein
KGU53261.1	methyltransferase
KGU53514.1	hypothetical protein
KGU53764.1	pilus assembly protein PilV
KGU53765.1	pilus assembly protein
KGU53766.1	pilus assembly protein PilE
KGU53769.1	pre-pilin like leader sequence
KGU53770.1	pilus assembly protein
KGU54237.1	integrase
KGU55371.1	galactarate dehydrogenase
KGU55372.2	glucarate dehydratase
KGU55373.1	glucarate transporter
KGU55374.1	2 5-dioxovalerate dehydrogenase
KGU55375.1	5-dehydro-4-deoxyglucarate dehydratase
KGU55376.1	LysR family transcriptional regulator
KGU55422.1	porin
KGU55563.1	hypothetical protein
KGU56157.1	TonB-dependent receptor
KGU56374.1	membrane protein
KGU56715.1	hypothetical protein
KGU56733.1	hypothetical protein
KGU56734.1	amine oxidase
KGU56735.1	polysaccharide biosynthesis protein
KGU56736.1	ribonuclease III
KGU56737.1	hypothetical protein
KGU56829.1	hypothetical protein
KGU56830.1	hypothetical protein
KKW48692.1	hypothetical protein
KKW48708.1	hypothetical protein
KKW48794.1	hypothetical protein
KKW48949.1	hypothetical protein
PRJNA263153:NB99 22880	hypothetical protein

## Sheet: Xap GL1
Table S3. Genes found in Xap GL1 but absent from Xff and lablab-associated Xap.
Each of these genes was covered over at least 95% of its length by sequence reads from each of the sequenced Xap GL1 genomes but covered by no more than 30% of its length by aligned reads from any of the Xff or lablab-associated Xap genomes.
Breadth of coverage was based on alignments of the genomic sequences reads against the reference pan-genome using BWA-MEM.
Accession	Description
KHS31773	hypothetical protein
KHS32523	hypothetical protein
KHS32525	hypothetical protein
KHS32582	baseplate assembly protein
KHS32717	transposase
KHS32718	hypothetical protein
KHS32719	hypothetical protein
KHS32720	hypothetical protein
KHS32721	hypothetical protein
KHS32722	hypothetical protein
KHS32723	hypothetical protein
KHS33554	hypothetical protein
KHS33556	integrase
KHS33557	hypothetical protein
KHS33797	hypothetical protein
KHS33831	tail fiber assembly protein
KHS33832	hypothetical protein
KHS33862	hypothetical protein
KHS33863	hypothetical protein
KHS33864	hypothetical protein
KHS33930	hypothetical protein
KHS34155	hypothetical protein
KHS34162	hypothetical protein
KHS34252	hypothetical protein
KHS34301	hypothetical protein
KHS34370	hypothetical protein
KHS34371	integrase
KHS34433	hypothetical protein
KHS34435	BadM/Rrf2 family transcriptional regulator
KHS34436	thioredoxin reductase
KHS34456	ATPase
KHS34457	chemotaxis protein CheY
KHS34561	hypothetical protein
KHS34585	type III secretion system protein InvA
KHS34586	hypothetical protein
KHS34587	hypothetical protein
KHS34588	hypothetical protein
KHS34589	hypothetical protein
KHS34590	hypothetical protein
KHS34591	type III secretion system protein
KHS34592	hypothetical protein
KHS34593	hypothetical protein
KHS34594	hypothetical protein
KHS34595	hypothetical protein
KHS34596	hypothetical protein
KHS34597	hypothetical protein
KHS34598	hypothetical protein
KHS34599	hypothetical protein
KHS34600	hypothetical protein
KHS34601	hypothetical protein
KHS34602	hypothetical protein
KHS34627	protein-S-isoprenylcysteine methyltransferase
KHS34635	LuxR family transcriptional regulator
KHS34637	hypothetical protein
KHS34671	hypothetical protein
KHS34690	nitrite reductase
KHS34691	MFS transporter
KHS34692	nitrate ABC transporter substrate-binding
KHS34836	hypothetical protein
KHS34920	oxidoreductase
KHS34921	LysR family transcriptional regulator
KHS34930	glutamyl-tRNA(Gln) amidotransferase subunit A
KHS34931	membrane protein
KHS34937	transcriptional regulator
KHS34966	hypothetical protein
KHS35235	hypothetical protein
KHS35333	hypothetical protein
KHS35341	hypothetical protein
KHS35507	hypothetical protein
KHS35625	AraC family transcriptional regulator
KHS35626	peptidase S41
KHS35637	TonB-dependent receptor
KHS35638	hypothetical protein
KHS35639	hypothetical protein
KHS35733	hypothetical protein
KHS35747	hypothetical protein
KHS35763	hypothetical protein
KHS35765	hypothetical protein
KHS35777	hypothetical protein
KHS35962	hypothetical protein
KHS36059	membrane protein
KHS36099	hypothetical protein
KHS36103	hypothetical protein
KHS36305	peptide-binding protein
KHS36321	hypothetical protein
KHS36395	hypothetical protein
KHS36488	hypothetical protein
KHS36558	hypothetical protein
KHS36587	transcriptional regulator
KHS36599	hypothetical protein
KHS36611	hypothetical protein
KHS36756	hypothetical protein
KHS36820	hypothetical protein
KHS36905	hypothetical protein
KHS36918	hypothetical protein
KHS36926	cation transporter
KHS36933	transporter
KHS36941	RNA methyltransferase
KHS36962	coproporphyrinogen III oxidase
KHS36963	metalloenzyme domain-containing protein
KHS36964	hypothetical protein
KHS36965	ATPase AAA
KHS36967	hypothetical protein
KHS36974	hypothetical protein
KHS37170	hypothetical protein
KHS37202	RNA polymerase sigma70
KHS37316	glucan biosynthesis protein
KHS37329	membrane protein
KHS37355	hypothetical protein
KHS37356	sulfotransferase
KHS37357	ABC transporter ATP-binding protein
KHS37558	hypothetical protein
KHS37688	hypothetical protein
KHS37689	hypothetical protein
KHS37690	hypothetical protein
KHS37779	hypothetical protein
KHS37780	hypothetical protein
KHS37803	ArsR family transcriptional regulator
KHS37933	hypothetical protein
KHS37990	hypothetical protein
KHS38607	hypothetical protein
KHS38608	hypothetical protein
KHS38895	hypothetical protein
KHS38947	fimbrial protein
KHS38949	pilus assembly protein
KHS39041	3-deoxy-manno-octulosonate cytidylyltransferase
KHS39043	methyltransferase
KHS39101	hypothetical protein
KHS39108	addiction module protein
KHS39222	ketosteroid isomerase
KHS39223	LysR family transcriptional regulator
KHS39227	chloride channel protein
KHS39521	hypothetical protein
KHS39674	hypothetical protein
KHS39807	hypothetical protein
KHS39921	hypothetical protein
KHS40058	hypothetical protein
KHS40082	histidine kinase
KHS40083	hypothetical protein
KHS40090	chitinase
KHS40367	histidine kinase
KHS40369	Tfp pilus assembly protein PilW
KHS40886	hypothetical protein
KHS40930	hypothetical protein
KHS40957	hypothetical protein
KHS41130	hypothetical protein
KHS41166	hypothetical protein
KHS41214	hypothetical protein
KHS41218	transcriptional regulator
KHS41299	hypothetical protein
KHS41374	long-chain acyl-CoA synthetase
KHS41375	long-chain fatty acid--CoA ligase
KHS41376	short-chain dehydrogenase
KHS41377	tetratricopeptide repeat protein
KHS41378	transcriptional regulator
KHS41390	histidine kinase
KHS41417	aspartyl beta-hydroxylase
KHS41418	cytochrome c biogenesis factor
KHS41419	hypothetical protein
KHS41420	sulfotransferase
KHS41421	TonB-dependent receptor
PRJNA270010:RN19 23245	chemotaxis protein
PRJNA270010:RN19 23465	hypothetical protein
PRJNA270010:RN19 23605	hypothetical protein
PRJNA270010:RN19 23805	hypothetical protein
PRJNA270010:RN19 23905	pilus assembly protein
PRJNA270010:RN19 24020	hypothetical protein
PRJNA270010:RN19 24165	hypothetical protein
PRJNA270010:RN19 24235	hypothetical protein
PRJNA270010:RN19 24245	hypothetical protein
PRJNA270010:RN19 25155	hypothetical protein

## Sheet: Lablab
Table S4. Genes found in lablab-associated Xap but absent from Xff and Xap GL1.
Each of these genes was covered over at least 95% of its length by sequence reads from each of the sequenced lablab-associated Xap genomes but covered by no more than 30% of its length by aligned reads from any of the Xff or Xap GL1 genomes.
Breadth of coverage was based on alignments of the genomic sequences reads against the reference pan-genome using BWA-MEM.
Accession	Description
KHF46216	hypothetical protein
KHF46253	hypothetical protein
KHF46840	hypothetical protein
KHF46860	histidine kinase
KHF49249	hypothetical protein
KHS05251	hypothetical protein
KHS05293	hypothetical protein
KHS05314	hypothetical protein
KHS05315	Type III restriction enzyme res subunit
KHS05316	DNA methylase
KHS05318	hypothetical protein
KHS05350	hypothetical protein
KHS05374	hypothetical protein
KHS05398	hypothetical protein
KHS05399	hypothetical protein
KHS05428	hypothetical protein
KHS05432	oxidoreductase
KHS05433	hypothetical protein
KHS05434	hypothetical protein
KHS05484	oxidoreductase
KHS05485	epimerase
KHS05489	pilus assembly protein PilW
KHS05559	peptidase M61
KHS05757	XRE family transcriptional regulator
KHS05871	GCN5 family acetyltransferase
KHS05996	hypothetical protein
KHS05997	radical SAM protein
KHS05998	hypothetical protein
KHS06001	integrase
KHS06149	hypothetical protein
KHS06445	phosphopantetheinyl transferase
KHS06764	enterocin
KHS06882	aldehyde oxidase
KHS06992	hypothetical protein
KHS07180	hypothetical protein
KHS07181	hypothetical protein
KHS07201	phage tail protein
KHS07203	arylsulfotransferase
KHS07204	hypothetical protein
KHS07206	SAM-dependent methlyltransferase
KHS07207	asparagine synthase
KHS07208	hypothetical protein
KHS07209	hypothetical protein
KHS07210	transposase
KHS07211	methyltransferase
KHS07212	membrane protein
KHS07213	asparagine synthase
KHS07214	hypothetical protein
KHS07215	membrane protein
KHS07216	glycosyl transferase family 1
KHS07217	UDP-N-acetyl-D-mannosamine transferase
KHS07218	ligase
KHS07219	glycosyl transferase family 1
KHS07220	UDP-phosphate glucose phosphotransferase
KHS07221	glycosyl transferase family 1
KHS07222	mannosyltransferase
KHS07252	hypothetical protein
KHS07253	hypothetical protein
KHS07254	transporter
KHS07255	sugar transporter
KHS07256	methyltransferase type 12
KHS07296	hypothetical protein
KHS07297	hypothetical protein
KHS07330	AraC family transcriptional regulator
KHS07331	hypothetical protein
KHS07332	START domain protein
KHS07333	hypothetical protein
KHS07334	short-chain dehydrogenase
KHS07338	type III secretion system effector protein
KHS07498	hypothetical protein
KHS07499	hypothetical protein
KHS07584	calcium-binding protein
KHS07783	membrane protein
KHS07836	hypothetical protein
KHS07979	hypothetical protein
KHS08090	hypothetical protein
KHS08206	CopG family transcriptional regulator
KHS08252	transcriptional regulator
KHS08317	hypothetical protein
KHS08379	hypothetical protein
KHS08423	hypothetical protein
KHS08765	hypothetical protein
KHS08766	hypothetical protein
KHS08767	glycosyl transferase family 9
KHS08773	hypothetical protein
KHS08981	ligand-gated channel
KHS09024	UDP kinase
KHS09025	flagellar biosynthesis protein FlhB
KHS09026	flagellar biosynthesis protein FlhA
KHS09027	flagellar hook-basal body protein
KHS09028	flagellar hook-basal body protein
KHS09029	flagellar basal body P-ring biosynthesis protein
KHS09031	flagellar P-ring protein FlgI
KHS09032	hypothetical protein
KHS09033	hypothetical protein
KHS09034	hypothetical protein
KHS09035	ATP synthase
KHS09036	hypothetical protein
KHS09037	flagellar hook capping protein
KHS09038	flagellar hook-basal body protein
KHS09039	hypothetical protein
KHS09040	hypothetical protein
KHS09041	flagellar biosynthesis protein flip
KHS09042	RNA polymerase sigma-70 factor
KHS09072	hypothetical protein
KHS09073	hypothetical protein
KHS09162	hypothetical protein
KHS09164	hypothetical protein
KHS09167	hypothetical protein
KHS09270	hypothetical protein
KHS31033	hypothetical protein
PRJNA268142:QQ30 23585	transposase
PRJNA268142:QQ30 23775	hypothetical protein
PRJNA268142:QQ30 25245	hypothetical protein
PRJNA268142:QQ30 26020	flagellar M-ring protein FliF
PRJNA268142:QQ30 26715	hypothetical protein
PRJNA269802:RM61 23105	hypothetical protein
PRJNA269802:RM61 23120	glucose sorbosone dehydrogenase
PRJNA269802:RM61 23125	peptidoglycan-binding protein
PRJNA269802:RM61 23135	hypothetical protein
PRJNA269802:RM61 23315	hypothetical protein
PRJNA269802:RM61 23485	hypothetical protein
PRJNA269802:RM61 23580	hypothetical protein
PRJNA269802:RM61 24490	hypothetical protein
PRJNA269802:RM61 24950	transposase
PRJNA269802:RM61 25105	hypothetical protein
PRJNA269802:RM61 25435	type III secretion system effector protein

## Sheet: Xap GL1 & Xff
Table S5. Genes found in Xap GL1 and Xff but absent from lablab-associated Xap.
Each of these genes was covered over at least 95% of its length by sequence reads from each of the sequenced Xap GL1 and Xff genomes but covered by no more than 30% of its length by aligned reads from any of the lablab-associated Xap genomes.
Breadth of coverage was based on alignments of the genomic sequences reads against the reference pan-genome using BWA-MEM.
Accession	Description
KGU48816.1	hypothetical protein
KGU50255.1	hypothetical protein
KGU50386.1	hypothetical protein
KGU50427.1	hypothetical protein
KGU50466.1	LysR family transcriptional regulator
KGU50467.1	short-chain dehydrogenase
KGU50793.1	transducer protein car
KGU50994.1	oxidoreductase
KGU50995.1	AraC family transcriptional regulator
KGU51344.1	integrase
KGU51377.2	ADP-ribosylation/crystallin J1
KGU51433.1	hypothetical protein
KGU51457.1	hypothetical protein
KGU51533.1	transposase
KGU51650.1	hypothetical protein
KGU51734.1	LysR family transcriptional regulator
KGU51748.1	alpha/beta hydrolase
KGU52009.1	endonuclease
KGU52015.1	hypothetical protein
KGU52017.1	hypothetical protein
KGU52018.1	sulfate transporter
KGU52020.1	methionine aminopeptidase
KGU52021.1	hypothetical protein
KGU52624.1	tail collar protein
KGU52632.2	hemagglutinin
KGU52827.1	adenylate cyclase
KGU53452.1	hypothetical protein
KGU53454.1	hypothetical protein
KGU53466.1	dihydroorotate dehydrogenase
KGU54122.1	membrane protein
KGU54128.1	methyltransferase
KGU54129.1	cytochrome P450
KGU54131.1	hypothetical protein
KGU54490.1	hypothetical protein
KGU55549.1	hypothetical protein
KGU55562.1	hypothetical protein
KGU56526.1	hypothetical protein
KGU56527.1	transcriptional regulator
KGU56539.1	biopolymer transporter ExbD
KGU56660.1	dipeptidyl-peptidase 7
KHS34695	F420H2:quinone oxidoreductase
KHS39585	plasmid stabilization protein
KKW48473.1	hypothetical protein
KKW48540.1	hypothetical protein
KKW48549.1	hypothetical protein
KKW48757.1	HpaF protein
KKW48760.1	hypothetical protein
KKW48810.1	resolvase
PRJNA266873:PK63 22130	transposase

## Sheet: Xap GL1_& lablab
Table S6. Genes found in lablab-associated Xap and Xap GL1 but absent from Xff.
Each of these genes was covered over at least 95% of its length by sequence reads from each of the sequenced lablab-associated Xap and Xap GL1 genomes but covered by no more than 30% of its length by aligned reads from any of the Xff genomes.
Breadth of coverage was based on alignments of the genomic sequences reads against the reference pan-genome using BWA-MEM.
Accession	Description
KHS05752	hypothetical protein
KHS33391	hypothetical protein
KHS33392	chemotaxis protein
KHS33542	LysR family transcriptional regulator
KHS34259	LysR family transcriptional regulator
KHS34847	allophanate hydrolase
KHS34848	urea carboxylase
KHS35371	ATPase AAA
KHS35992	hypothetical protein
KHS37131	membrane protein
KHS37132	membrane protein
KHS37135	short-chain dehydrogenase
KHS37136	FAD-linked oxidase
KHS37137	membrane protein
KHS37138	membrane protein
KHS37723	RNA polymerase sigma70
KHS37724	membrane protein
KHS38567	hypothetical protein
KHS38568	peptidase S8
KHS39898	hypothetical protein
KHS40273	hypothetical protein
KHS40963	peptidase S9
KHS41282	hypothetical protein
KHS41283	hypothetical protein
KHS41455	2OG-Fe(II) oxygenase
PRJNA268142:QQ30 24300	aminopeptidase N
PRJNA270010:RN19 24880	transposase

## Sheet: Xff & lablab
Table S7. Genes found in lablab-associated Xff and Xap GL1 but absent from Xap GL1.
Each of these genes was covered over at least 95% of its length by sequence reads from each of the sequenced lablab-associated and Xff genomes but covered by no more than 30% of its length by aligned reads from any of the Xap GL1 genomes.
Breadth of coverage was based on alignments of the genomic sequences reads against the reference pan-genome using BWA-MEM.
Accession	Description
KGK66335	hypothetical protein
KGU50240.1	transposase
KGU50511.1	membrane protein
KGU50514.1	membrane protein
KGU50785.1	short-chain dehydrogenase
KGU50800.1	death-on-curing protein
KGU50805.1	hypothetical protein
KGU50861.1	histidine kinase
KGU50862.1	D-Ala-D-Ala carboxypeptidase
KGU50874.1	transcriptional regulator
KGU50901.1	HmsH protein
KGU50902.1	hemin storage protein
KGU50903.1	N-glycosyltransferase
KGU50904.1	membrane protein
KGU50924.1	ABC transporter ATP-binding protein
KGU50925.1	peptide ABC transporter permease
KGU50926.1	ABC transporter permease
KGU50927.1	peptide ABC transporter substrate-binding
KGU50928.2	acyl-CoA dehydrogenase
KGU50929.1	ligand-gated channel
KGU50930.1	FMN reductase
KGU50931.1	alkanesulfonate monooxygenase
KGU50932.1	ABC transporter substrate-binding protein
KGU50933.1	ABC transporter permease
KGU50934.1	sulfonate ABC transporter ATP-binding protein
KGU50935.1	monooxygenase
KGU50936.1	Fis family transcriptional regulator
KGU50938.1	hypothetical protein
KGU51006.1	TonB-dependent receptor
KGU51239.1	UDP-glucose 6-dehydrogenase
KGU51380.1	hypothetical protein
KGU51386.1	hypothetical protein
KGU51481.1	membrane protein
KGU51655.1	glycerophosphodiester phosphodiesterase
KGU51667.2	glycosyl transferase
KGU51668.1	membrane protein
KGU51715.1	hypothetical protein
KGU51716.1	alpha/beta hydrolase
KGU51724.1	Oar protein
KGU51740.1	hypothetical protein
KGU51858.1	hypothetical protein
KGU51985.1	UDP-glucose 4-epimerase
KGU51986.1	glycosyl transferase
KGU51987.1	UDP-galactopyranose mutase
KGU51988.1	beta-glucosidase
KGU52001.1	ligand-gated channel
KGU52007.1	hypothetical protein
KGU52008.1	ABC-type phosphate transport system periplasmic
KGU52394.1	hypothetical protein
KGU53190.1	hypothetical protein
KGU53243.1	ketoacyl reductase
KGU53262.1	UDP-3-O-(3-hydroxymyristoyl) glucosamine
KGU53263.1	ribosomal subunit interface protein
KGU53264.1	acetyltransferase
KGU53265.1	3-oxoacyl-ACP reductase
KGU53266.1	3-oxoacyl-ACP reductase
KGU53267.1	3-oxoacyl-ACP synthase
KGU53341.1	TonB-dependent receptor
KGU53342.1	beta-galactosidase
KGU53343.1	membrane protein
KGU53368.1	aspartate aminotransferase
KGU53369.1	phenazine biosynthesis protein PhzF
KGU53370.1	permease
KGU53546.1	hypothetical protein
KGU53684.1	hypothetical protein
KGU54168.1	type III secretion system effector protein
KGU54174.1	hypothetical protein
KGU54281.2	hypothetical protein
KGU54427.1	LysR family transcriptional regulator
KGU54428.1	membrane protein
KGU54447.1	TonB-dependent receptor
KGU54455.1	flavodoxin
KGU54482.1	hypothetical protein
KGU54485.1	hypothetical protein
KGU54486.1	hypothetical protein
KGU54487.2	transcriptional regulator
KGU54770.1	beta glucosidase
KGU54771.1	ribokinase
KGU54773.2	hypothetical protein
KGU54774.1	TonB-dependent receptor
KGU54958.1	esterase
KGU54981.1	chemotaxis protein
KGU54983.1	sulfate transporter
KGU54984.1	peptidase M20
KGU55170.1	NAD(P) transhydrogenase subunit beta
KGU55175.1	transcriptional regulator
KGU55215.1	membrane protein
KGU55220.1	acetaldehyde dehydrogenase
KGU55225.1	beta-lactamase
KGU55237.1	aldehyde dehydrogenase
KGU55325.1	TonB-dependent receptor
KGU55326.1	nitrilotriacetate monooxygenase
KGU55327.1	L-glyceraldehyde 3-phosphate reductase
KGU55328.1	sulfonate ABC transporter substrate-binding
KGU55817.1	IroE protein
KGU55818.1	outer membrane receptor protein
KGU55837.1	hypothetical protein
KGU55974.1	hypothetical protein
KGU56088.1	hypothetical protein
KGU56145.1	alpha/beta hydrolase
KHS05367	beta-lactamase
KHS05368	transcriptional regulator
KHS05493	fimbrial protein
KHS05622	TetR family transcriptional regulator
KHS05658	DeoR faimly transcriptional regulator
KHS05953	alpha-N-acetylglucosaminidase
KHS06150	recombinase
KHS06212	hypothetical protein
KHS06460	chemotaxis protein
KHS06531	monooxygenase
KHS06947	hypothetical protein
KHS07522	hypothetical protein
KHS07912	hypothetical protein
KHS08114	hypothetical protein
KHS08290	hypothetical protein
KHS08753	hypothetical protein
KHS08754	glyoxalase
KHS08825	hypothetical protein
KKW48699.1	hydrolase
