# Supplementary material for: Genome sequencing reveals a new lineage associated with lablab bean and genetic exchange between Xanthomonas axonopodis pv. phaseoli and Xanthomonas fuscans subsp. fuscans
Source: Front Microbiol. 2015 Oct 7;6:1080. doi: 10.3389/fmicb.2015.01080 (PMC4595841; doi:10.3389/fmicb.2015.01080)
Supplement: Supplementary file 5 [file SNPs(BWA-MEM).CSV]

seq_id	position	reference	1056	1058	1138	1158	1402	1420	1433	1495	1646	1654	1680	1713	1811	2064	220	2665	301	3035	3660	381	556	557	670	X621	X631	XCP123	genes	silent/non-silent	distribution
NC_022539.1	23693	a	a	a	a	a	a	a	a	a	a	a	a	G	a	G	a	a	a	a	a	a	G	G	a	a	a	a			1713 2064 556 557
NC_022539.1	23822	t	t	t	t	t	t	t	t	t	t	t	t	C	t	C	t	t	t	t	t	t	C	C	t	t	t	t			1713 2064 556 557
NC_022539.1	23889	c	c	c	c	c	c	c	c	c	c	c	c	A	c	A	c	c	c	c	c	c	A	A	c	c	c	c			1713 2064 556 557
NC_022539.1	23992	c	c	c	c	c	c	c	c	c	c	c	c	A	c	A	c	c	c	c	c	c	A	A	c	c	c	c	cds25;Name=YP_008636857.1;Parent=gene32;Dbxref=Genbank:YP_008636857.1,GeneID:17148903;gbkey=CDS;gene=TXac2_1;product=Xac2 transposase ORF1;protein_id=YP_008636857.1;transl_table=11 Xac2 transposase ORF1 (23942-24208 -)	non-silent gcg -> Tcg;	1713 2064 556 557
NC_022539.1	23995	c	c	c	c	c	c	c	c	c	c	c	c	T	c	T	c	c	c	c	c	c	T	T	c	c	c	c	cds25;Name=YP_008636857.1;Parent=gene32;Dbxref=Genbank:YP_008636857.1,GeneID:17148903;gbkey=CDS;gene=TXac2_1;product=Xac2 transposase ORF1;protein_id=YP_008636857.1;transl_table=11 Xac2 transposase ORF1 (23942-24208 -)	non-silent gag -> Aag;	1713 2064 556 557
NC_022539.1	24024	t	t	t	t	t	t	t	t	t	t	t	t	C	t	C	t	t	t	t	t	t	C	C	t	t	t	t	cds25;Name=YP_008636857.1;Parent=gene32;Dbxref=Genbank:YP_008636857.1,GeneID:17148903;gbkey=CDS;gene=TXac2_1;product=Xac2 transposase ORF1;protein_id=YP_008636857.1;transl_table=11 Xac2 transposase ORF1 (23942-24208 -)	non-silent gag -> gGg;	1713 2064 556 557
NC_022539.1	25507	a	a	a	a	a	a	a	a	a	a	a	a	G	a	G	a	a	a	a	a	a	G	G	a	a	a	a	cds27;Name=YP_008636859.1;Parent=gene34;Dbxref=Genbank:YP_008636859.1,GeneID:17148886;gbkey=CDS;product=hypothetical protein;protein_id=YP_008636859.1;transl_table=11 hypothetical protein (25450-25896 -)	silent ggt -> ggC;	1713 2064 556 557
NC_022539.1	25542	t	t	t	t	t	t	t	t	t	t	t	t	C	t	C	t	t	t	t	t	t	C	C	t	t	t	t	cds27;Name=YP_008636859.1;Parent=gene34;Dbxref=Genbank:YP_008636859.1,GeneID:17148886;gbkey=CDS;product=hypothetical protein;protein_id=YP_008636859.1;transl_table=11 hypothetical protein (25450-25896 -)	non-silent acc -> Gcc;	1713 2064 556 557
NC_022539.1	25640	a	a	a	a	a	a	a	a	a	a	a	a	G	a	G	a	a	a	a	a	a	G	G	a	a	a	a	cds27;Name=YP_008636859.1;Parent=gene34;Dbxref=Genbank:YP_008636859.1,GeneID:17148886;gbkey=CDS;product=hypothetical protein;protein_id=YP_008636859.1;transl_table=11 hypothetical protein (25450-25896 -)	non-silent ttg -> tCg;	1713 2064 556 557
NC_022539.1	25663	a	a	a	a	a	a	a	a	a	a	a	a	G	a	G	a	a	a	a	a	a	G	G	a	a	a	a	cds27;Name=YP_008636859.1;Parent=gene34;Dbxref=Genbank:YP_008636859.1,GeneID:17148886;gbkey=CDS;product=hypothetical protein;protein_id=YP_008636859.1;transl_table=11 hypothetical protein (25450-25896 -)	silent aat -> aaC;	1713 2064 556 557
NC_022539.1	25678	g	g	g	g	g	g	g	g	g	g	g	g	A	g	A	g	g	g	g	g	g	A	A	g	g	g	g	cds27;Name=YP_008636859.1;Parent=gene34;Dbxref=Genbank:YP_008636859.1,GeneID:17148886;gbkey=CDS;product=hypothetical protein;protein_id=YP_008636859.1;transl_table=11 hypothetical protein (25450-25896 -)	silent gtc -> gtT;	1713 2064 556 557
NC_022539.1	25684	c	c	T	T	c	c	T	c	c	c	c	c	c	T	c	T	c	c	T	c	c	c	c	c	c	c	T	cds27;Name=YP_008636859.1;Parent=gene34;Dbxref=Genbank:YP_008636859.1,GeneID:17148886;gbkey=CDS;product=hypothetical protein;protein_id=YP_008636859.1;transl_table=11 hypothetical protein (25450-25896 -)	silent ccg -> ccA;	1058 1138 1420 1811 220 3035 XCP123
NC_022539.1	25690	c	c	c	c	c	c	c	c	c	c	c	c	T	c	T	c	c	c	c	c	c	T	T	c	c	c	c	cds27;Name=YP_008636859.1;Parent=gene34;Dbxref=Genbank:YP_008636859.1,GeneID:17148886;gbkey=CDS;product=hypothetical protein;protein_id=YP_008636859.1;transl_table=11 hypothetical protein (25450-25896 -)	silent gtg -> gtA;	1713 2064 556 557
NC_022539.1	25693	c	c	c	c	c	c	c	c	c	c	c	c	T	c	T	c	c	c	c	c	c	T	T	c	c	c	c	cds27;Name=YP_008636859.1;Parent=gene34;Dbxref=Genbank:YP_008636859.1,GeneID:17148886;gbkey=CDS;product=hypothetical protein;protein_id=YP_008636859.1;transl_table=11 hypothetical protein (25450-25896 -)	silent tcg -> tcA;	1713 2064 556 557
NC_022539.1	25705	a	a	a	a	a	a	a	a	a	a	a	a	G	a	G	a	a	a	a	a	a	G	G	a	a	a	a	cds27;Name=YP_008636859.1;Parent=gene34;Dbxref=Genbank:YP_008636859.1,GeneID:17148886;gbkey=CDS;product=hypothetical protein;protein_id=YP_008636859.1;transl_table=11 hypothetical protein (25450-25896 -)	silent ggt -> ggC;	1713 2064 556 557
NC_022539.1	25729	c	c	c	c	c	c	c	c	c	c	c	c	A	c	A	c	c	c	c	c	c	A	A	c	c	c	c	cds27;Name=YP_008636859.1;Parent=gene34;Dbxref=Genbank:YP_008636859.1,GeneID:17148886;gbkey=CDS;product=hypothetical protein;protein_id=YP_008636859.1;transl_table=11 hypothetical protein (25450-25896 -)	silent tcg -> tcT;	1713 2064 556 557
NC_022539.1	25738	c	c	c	c	c	c	c	c	c	c	c	c	A	c	A	c	c	c	c	c	c	A	A	c	c	c	c	cds27;Name=YP_008636859.1;Parent=gene34;Dbxref=Genbank:YP_008636859.1,GeneID:17148886;gbkey=CDS;product=hypothetical protein;protein_id=YP_008636859.1;transl_table=11 hypothetical protein (25450-25896 -)	silent ggg -> ggT;	1713 2064 556 557
NC_022539.1	25825	t	t	C	C	t	t	C	t	t	t	t	t	C	C	C	C	t	t	C	t	t	C	C	t	t	t	C	cds27;Name=YP_008636859.1;Parent=gene34;Dbxref=Genbank:YP_008636859.1,GeneID:17148886;gbkey=CDS;product=hypothetical protein;protein_id=YP_008636859.1;transl_table=11 hypothetical protein (25450-25896 -)	silent caa -> caG;	1058 1138 1420 1713 1811 2064 220 3035 556 557 XCP123
NC_022539.1	25871	c	c	T	T	c	c	T	c	c	c	c	c	c	T	c	T	c	c	T	c	c	c	c	c	c	c	T	cds27;Name=YP_008636859.1;Parent=gene34;Dbxref=Genbank:YP_008636859.1,GeneID:17148886;gbkey=CDS;product=hypothetical protein;protein_id=YP_008636859.1;transl_table=11 hypothetical protein (25450-25896 -)	non-silent tgt -> tAt;	1058 1138 1420 1811 220 3035 XCP123
NC_022539.1	25919	g	g	g	g	g	g	g	g	g	g	g	g	A	g	A	g	g	g	g	g	g	A	A	g	g	g	g			1713 2064 556 557
NC_022539.1	25928	c	c	c	c	c	c	c	c	c	c	c	c	T	c	T	c	c	c	c	c	c	T	T	c	c	c	c			1713 2064 556 557
NC_022539.1	25934	t	t	t	t	t	t	t	t	t	t	t	t	G	t	G	t	t	t	t	t	t	G	G	t	t	t	t			1713 2064 556 557
NC_022539.1	26045	a	a	a	a	a	a	a	a	a	a	a	a	G	a	G	a	a	a	a	a	a	G	G	a	a	a	a			1713 2064 556 557
NC_022539.1	26061	t	t	t	t	t	t	t	t	t	t	t	t	C	t	C	t	t	t	t	t	t	C	C	t	t	t	t			1713 2064 556 557
NC_022539.1	26069	g	g	g	g	g	g	g	g	g	g	g	g	A	g	A	g	g	g	g	g	g	A	A	g	g	g	g			1713 2064 556 557
NC_022539.1	26082	g	g	g	g	g	g	g	g	g	g	g	g	A	g	A	g	g	g	g	g	g	A	A	g	g	g	g			1713 2064 556 557
NC_022539.1	26082	g	g	C	C	g	g	C	g	g	g	g	g	g	C	g	C	g	g	C	g	g	g	g	g	g	g	C			1058 1138 1420 1811 220 3035 XCP123
NC_022539.1	26090	a	a	G	G	a	a	G	a	a	a	a	a	G	G	G	G	a	a	G	a	a	G	G	a	a	a	G			1058 1138 1420 1713 1811 2064 220 3035 556 557 XCP123
NC_022539.1	26099	c	c	T	T	c	c	T	c	c	c	c	c	c	T	c	T	c	c	T	c	c	c	c	c	c	c	T			1058 1138 1420 1811 220 3035 XCP123
NC_022539.1	26133	g	g	A	A	g	g	A	g	g	g	g	g	g	A	g	A	g	g	A	g	g	g	g	g	g	g	A			1058 1138 1420 1811 220 3035 XCP123
NC_022539.1	26176	t	t	t	t	t	t	t	t	t	t	t	t	C	t	C	t	t	t	t	t	t	C	C	t	t	t	t			1713 2064 556 557
NC_022539.1	26196	a	a	a	a	a	a	a	a	a	a	a	a	G	a	G	a	a	a	a	a	a	G	G	a	a	a	a			1713 2064 556 557
NC_022539.1	26246	t	t	C	C	t	t	C	t	t	t	t	t	t	C	t	C	t	t	C	t	t	t	t	t	t	t	C	cds28;Name=YP_008636860.1;Parent=gene35;Dbxref=Genbank:YP_008636860.1,GeneID:17148887;gbkey=CDS;product=hypothetical protein;protein_id=YP_008636860.1;transl_table=11 hypothetical protein (26226-26510 +)	silent tat -> taC;	1058 1138 1420 1811 220 3035 XCP123
NC_022539.1	26321	g	g	A	A	g	g	A	g	g	g	g	g	g	A	g	A	g	g	A	g	g	g	g	g	g	g	A	cds28;Name=YP_008636860.1;Parent=gene35;Dbxref=Genbank:YP_008636860.1,GeneID:17148887;gbkey=CDS;product=hypothetical protein;protein_id=YP_008636860.1;transl_table=11 hypothetical protein (26226-26510 +)	silent cag -> caA;	1058 1138 1420 1811 220 3035 XCP123
NC_022539.1	26393	a	a	a	a	a	a	a	a	a	a	a	a	G	a	G	a	a	a	a	a	a	G	G	a	a	a	a	cds28;Name=YP_008636860.1;Parent=gene35;Dbxref=Genbank:YP_008636860.1,GeneID:17148887;gbkey=CDS;product=hypothetical protein;protein_id=YP_008636860.1;transl_table=11 hypothetical protein (26226-26510 +)	silent caa -> caG;	1713 2064 556 557
NC_022539.1	26396	t	t	t	t	t	t	t	t	t	t	t	t	C	t	C	t	t	t	t	t	t	C	C	t	t	t	t	cds28;Name=YP_008636860.1;Parent=gene35;Dbxref=Genbank:YP_008636860.1,GeneID:17148887;gbkey=CDS;product=hypothetical protein;protein_id=YP_008636860.1;transl_table=11 hypothetical protein (26226-26510 +)	silent gat -> gaC;	1713 2064 556 557
NC_022539.1	26486	g	g	T	T	g	g	T	g	g	g	g	g	g	T	g	T	g	g	T	g	g	g	g	g	g	g	T	cds28;Name=YP_008636860.1;Parent=gene35;Dbxref=Genbank:YP_008636860.1,GeneID:17148887;gbkey=CDS;product=hypothetical protein;protein_id=YP_008636860.1;transl_table=11 hypothetical protein (26226-26510 +)	non-silent gag -> gaT;	1058 1138 1420 1811 220 3035 XCP123
NC_022539.1	26521	g	g	g	g	g	g	g	g	g	g	g	g	A	g	A	g	g	g	g	g	g	A	A	g	g	g	g			1713 2064 556 557
NC_022539.1	26536	a	a	a	a	a	a	a	a	a	G	a	G	G	a	G	a	a	G	a	a	a	G	G	a	a	a	a			1646 1680 1713 2064 301 556 557
NC_022539.1	26540	t	t	t	t	t	t	t	t	t	t	t	t	C	t	C	t	t	t	t	t	t	C	C	t	t	t	t			1713 2064 556 557
NC_022539.1	26654	a	a	a	a	a	a	a	a	a	G	a	G	G	a	G	a	a	G	a	a	a	G	G	a	a	a	a			1646 1680 1713 2064 301 556 557
NC_022539.1	26669	g	g	g	g	g	g	g	g	g	g	g	g	T	g	T	g	g	g	g	g	g	T	T	g	g	g	g			1713 2064 556 557
NC_022539.1	26682	g	g	g	g	g	g	g	g	g	g	g	g	T	g	T	g	g	g	g	g	g	T	T	g	g	g	g	cds29;Name=YP_008636861.1;Parent=gene36;Dbxref=Genbank:YP_008636861.1,GeneID:17148888;gbkey=CDS;product=hypothetical protein;protein_id=YP_008636861.1;transl_table=11 hypothetical protein (26676-27215 -)	non-silent cac -> caA;	1713 2064 556 557
NC_022539.1	26742	a	a	a	a	a	a	a	a	a	a	a	a	G	a	G	a	a	a	a	a	a	G	G	a	a	a	a	cds29;Name=YP_008636861.1;Parent=gene36;Dbxref=Genbank:YP_008636861.1,GeneID:17148888;gbkey=CDS;product=hypothetical protein;protein_id=YP_008636861.1;transl_table=11 hypothetical protein (26676-27215 -)	silent gat -> gaC;	1713 2064 556 557
NC_022539.1	26750	a	a	a	a	a	a	a	a	a	a	a	a	C	a	C	a	a	a	a	a	a	C	C	a	a	a	a	cds29;Name=YP_008636861.1;Parent=gene36;Dbxref=Genbank:YP_008636861.1,GeneID:17148888;gbkey=CDS;product=hypothetical protein;protein_id=YP_008636861.1;transl_table=11 hypothetical protein (26676-27215 -)	non-silent tcg -> Gcg;	1713 2064 556 557
NC_022539.1	26769	a	a	a	a	a	a	a	a	a	C	a	C	C	a	C	a	a	C	a	a	a	C	C	a	a	a	a	cds29;Name=YP_008636861.1;Parent=gene36;Dbxref=Genbank:YP_008636861.1,GeneID:17148888;gbkey=CDS;product=hypothetical protein;protein_id=YP_008636861.1;transl_table=11 hypothetical protein (26676-27215 -)	silent ggt -> ggG;	1646 1680 1713 2064 301 556 557
NC_022539.1	26781	g	g	g	g	g	g	g	g	g	C	g	C	C	g	C	g	g	C	g	g	g	C	C	g	g	g	g	cds29;Name=YP_008636861.1;Parent=gene36;Dbxref=Genbank:YP_008636861.1,GeneID:17148888;gbkey=CDS;product=hypothetical protein;protein_id=YP_008636861.1;transl_table=11 hypothetical protein (26676-27215 -)	silent acc -> acG;	1646 1680 1713 2064 301 556 557
NC_022539.1	26790	a	a	a	a	a	a	a	a	a	G	a	G	G	a	G	a	a	G	a	a	a	G	G	a	a	a	a	cds29;Name=YP_008636861.1;Parent=gene36;Dbxref=Genbank:YP_008636861.1,GeneID:17148888;gbkey=CDS;product=hypothetical protein;protein_id=YP_008636861.1;transl_table=11 hypothetical protein (26676-27215 -)	silent cgt -> cgC;	1646 1680 1713 2064 301 556 557
NC_022539.1	26799	a	a	a	a	a	a	a	a	a	G	a	G	G	a	G	a	a	G	a	a	a	G	G	a	a	a	a	cds29;Name=YP_008636861.1;Parent=gene36;Dbxref=Genbank:YP_008636861.1,GeneID:17148888;gbkey=CDS;product=hypothetical protein;protein_id=YP_008636861.1;transl_table=11 hypothetical protein (26676-27215 -)	silent gct -> gcC;	1646 1680 1713 2064 301 556 557
NC_022539.1	26811	c	c	c	c	c	c	c	c	c	G	c	G	G	c	G	c	c	G	c	c	c	G	G	c	c	c	c	cds29;Name=YP_008636861.1;Parent=gene36;Dbxref=Genbank:YP_008636861.1,GeneID:17148888;gbkey=CDS;product=hypothetical protein;protein_id=YP_008636861.1;transl_table=11 hypothetical protein (26676-27215 -)	silent ggg -> ggC;	1646 1680 1713 2064 301 556 557
NC_022539.1	26850	g	g	g	g	g	g	g	g	g	A	g	A	g	g	g	g	g	A	g	g	g	g	g	g	g	g	g	cds29;Name=YP_008636861.1;Parent=gene36;Dbxref=Genbank:YP_008636861.1,GeneID:17148888;gbkey=CDS;product=hypothetical protein;protein_id=YP_008636861.1;transl_table=11 hypothetical protein (26676-27215 -)	silent ggc -> ggT;	1646 1680 301
NC_022539.1	26850	g	g	g	g	g	g	g	g	g	g	g	g	T	g	T	g	g	g	g	g	g	T	T	g	g	g	g	cds29;Name=YP_008636861.1;Parent=gene36;Dbxref=Genbank:YP_008636861.1,GeneID:17148888;gbkey=CDS;product=hypothetical protein;protein_id=YP_008636861.1;transl_table=11 hypothetical protein (26676-27215 -)	silent ggc -> ggA;	1713 2064 556 557
NC_022539.1	26856	g	g	g	g	g	g	g	g	g	g	g	g	A	g	A	g	g	g	g	g	g	A	A	g	g	g	g	cds29;Name=YP_008636861.1;Parent=gene36;Dbxref=Genbank:YP_008636861.1,GeneID:17148888;gbkey=CDS;product=hypothetical protein;protein_id=YP_008636861.1;transl_table=11 hypothetical protein (26676-27215 -)	silent tgc -> tgT;	1713 2064 556 557
NC_022539.1	26859	g	g	g	g	g	g	g	g	g	g	g	g	A	g	A	g	g	g	g	g	g	A	A	g	g	g	g	cds29;Name=YP_008636861.1;Parent=gene36;Dbxref=Genbank:YP_008636861.1,GeneID:17148888;gbkey=CDS;product=hypothetical protein;protein_id=YP_008636861.1;transl_table=11 hypothetical protein (26676-27215 -)	silent gac -> gaT;	1713 2064 556 557
NC_022539.1	26868	t	t	t	t	t	t	t	t	t	t	t	t	C	t	C	t	t	t	t	t	t	C	C	t	t	t	t	cds29;Name=YP_008636861.1;Parent=gene36;Dbxref=Genbank:YP_008636861.1,GeneID:17148888;gbkey=CDS;product=hypothetical protein;protein_id=YP_008636861.1;transl_table=11 hypothetical protein (26676-27215 -)	silent cca -> ccG;	1713 2064 556 557
NC_022539.1	26878	c	c	c	c	c	c	c	c	c	c	c	c	T	c	T	c	c	c	c	c	c	T	T	c	c	c	c	cds29;Name=YP_008636861.1;Parent=gene36;Dbxref=Genbank:YP_008636861.1,GeneID:17148888;gbkey=CDS;product=hypothetical protein;protein_id=YP_008636861.1;transl_table=11 hypothetical protein (26676-27215 -)	non-silent tgc -> tAc;	1713 2064 556 557
NC_022539.1	26879	a	a	a	a	a	a	a	a	a	a	a	a	T	a	T	a	a	a	a	a	a	T	T	a	a	a	a	cds29;Name=YP_008636861.1;Parent=gene36;Dbxref=Genbank:YP_008636861.1,GeneID:17148888;gbkey=CDS;product=hypothetical protein;protein_id=YP_008636861.1;transl_table=11 hypothetical protein (26676-27215 -)	non-silent tgc -> Agc;	1713 2064 556 557
NC_022539.1	26880	c	c	c	c	c	c	c	c	c	c	c	c	T	c	T	c	c	c	c	c	c	T	T	c	c	c	c	cds29;Name=YP_008636861.1;Parent=gene36;Dbxref=Genbank:YP_008636861.1,GeneID:17148888;gbkey=CDS;product=hypothetical protein;protein_id=YP_008636861.1;transl_table=11 hypothetical protein (26676-27215 -)	silent aag -> aaA;	1713 2064 556 557
NC_022539.1	26892	c	c	T	T	c	c	T	c	c	T	c	T	c	T	c	T	c	T	T	c	c	c	c	c	c	c	T	cds29;Name=YP_008636861.1;Parent=gene36;Dbxref=Genbank:YP_008636861.1,GeneID:17148888;gbkey=CDS;product=hypothetical protein;protein_id=YP_008636861.1;transl_table=11 hypothetical protein (26676-27215 -)	silent ttg -> ttA;	1058 1138 1420 1646 1680 1811 220 301 3035 XCP123
NC_022539.1	26901	g	g	g	g	g	g	g	g	g	g	g	g	A	g	A	g	g	g	g	g	g	A	A	g	g	g	g	cds29;Name=YP_008636861.1;Parent=gene36;Dbxref=Genbank:YP_008636861.1,GeneID:17148888;gbkey=CDS;product=hypothetical protein;protein_id=YP_008636861.1;transl_table=11 hypothetical protein (26676-27215 -)	silent tac -> taT;	1713 2064 556 557
NC_022539.1	26907	c	c	c	c	c	c	c	c	c	c	c	c	T	c	T	c	c	c	c	c	c	T	T	c	c	c	c	cds29;Name=YP_008636861.1;Parent=gene36;Dbxref=Genbank:YP_008636861.1,GeneID:17148888;gbkey=CDS;product=hypothetical protein;protein_id=YP_008636861.1;transl_table=11 hypothetical protein (26676-27215 -)	silent gag -> gaA;	1713 2064 556 557
NC_022539.1	26908	t	t	t	t	t	t	t	t	t	t	t	t	C	t	C	t	t	t	t	t	t	C	C	t	t	t	t	cds29;Name=YP_008636861.1;Parent=gene36;Dbxref=Genbank:YP_008636861.1,GeneID:17148888;gbkey=CDS;product=hypothetical protein;protein_id=YP_008636861.1;transl_table=11 hypothetical protein (26676-27215 -)	non-silent gag -> gGg;	1713 2064 556 557
NC_022539.1	26946	a	a	a	a	a	a	a	a	a	G	a	G	G	a	G	a	a	G	a	a	a	G	G	a	a	a	a	cds29;Name=YP_008636861.1;Parent=gene36;Dbxref=Genbank:YP_008636861.1,GeneID:17148888;gbkey=CDS;product=hypothetical protein;protein_id=YP_008636861.1;transl_table=11 hypothetical protein (26676-27215 -)	silent cat -> caC;	1646 1680 1713 2064 301 556 557
NC_022539.1	26964	a	a	a	a	a	a	a	a	a	G	a	G	a	a	a	a	a	G	a	a	a	a	a	a	a	a	a	cds29;Name=YP_008636861.1;Parent=gene36;Dbxref=Genbank:YP_008636861.1,GeneID:17148888;gbkey=CDS;product=hypothetical protein;protein_id=YP_008636861.1;transl_table=11 hypothetical protein (26676-27215 -)	silent ttt -> ttC;	1646 1680 301
NC_022539.1	26970	a	a	a	a	a	a	a	a	a	G	a	G	G	a	G	a	a	G	a	a	a	G	G	a	a	a	a	cds29;Name=YP_008636861.1;Parent=gene36;Dbxref=Genbank:YP_008636861.1,GeneID:17148888;gbkey=CDS;product=hypothetical protein;protein_id=YP_008636861.1;transl_table=11 hypothetical protein (26676-27215 -)	silent tat -> taC;	1646 1680 1713 2064 301 556 557
NC_022539.1	26998	t	t	t	t	t	t	t	t	t	t	t	t	C	t	C	t	t	t	t	t	t	C	C	t	t	t	t	cds29;Name=YP_008636861.1;Parent=gene36;Dbxref=Genbank:YP_008636861.1,GeneID:17148888;gbkey=CDS;product=hypothetical protein;protein_id=YP_008636861.1;transl_table=11 hypothetical protein (26676-27215 -)	non-silent gac -> gGc;	1713 2064 556 557
NC_022539.1	27003	g	g	g	g	g	g	g	g	g	g	g	g	C	g	C	g	g	g	g	g	g	C	C	g	g	g	g	cds29;Name=YP_008636861.1;Parent=gene36;Dbxref=Genbank:YP_008636861.1,GeneID:17148888;gbkey=CDS;product=hypothetical protein;protein_id=YP_008636861.1;transl_table=11 hypothetical protein (26676-27215 -)	silent gtc -> gtG;	1713 2064 556 557
NC_022539.1	27010	t	t	t	t	t	t	t	t	t	C	t	C	C	t	C	t	t	C	t	t	t	C	C	t	t	t	t	cds29;Name=YP_008636861.1;Parent=gene36;Dbxref=Genbank:YP_008636861.1,GeneID:17148888;gbkey=CDS;product=hypothetical protein;protein_id=YP_008636861.1;transl_table=11 hypothetical protein (26676-27215 -)	non-silent tac -> tGc;	1646 1680 1713 2064 301 556 557
NC_022539.1	27018	g	g	g	g	g	g	g	g	g	g	g	g	A	g	A	g	g	g	g	g	g	A	A	g	g	g	g	cds29;Name=YP_008636861.1;Parent=gene36;Dbxref=Genbank:YP_008636861.1,GeneID:17148888;gbkey=CDS;product=hypothetical protein;protein_id=YP_008636861.1;transl_table=11 hypothetical protein (26676-27215 -)	silent cgc -> cgT;	1713 2064 556 557
NC_022539.1	27021	c	c	c	c	c	c	c	c	c	c	c	c	T	c	T	c	c	c	c	c	c	T	T	c	c	c	c	cds29;Name=YP_008636861.1;Parent=gene36;Dbxref=Genbank:YP_008636861.1,GeneID:17148888;gbkey=CDS;product=hypothetical protein;protein_id=YP_008636861.1;transl_table=11 hypothetical protein (26676-27215 -)	silent aag -> aaA;	1713 2064 556 557
NC_022539.1	27025	t	t	t	t	t	t	t	t	t	C	t	C	C	t	C	t	t	C	t	t	t	C	C	t	t	t	t	cds29;Name=YP_008636861.1;Parent=gene36;Dbxref=Genbank:YP_008636861.1,GeneID:17148888;gbkey=CDS;product=hypothetical protein;protein_id=YP_008636861.1;transl_table=11 hypothetical protein (26676-27215 -)	non-silent aat -> aGt;	1646 1680 1713 2064 301 556 557
NC_022539.1	27035	t	t	t	t	t	t	t	t	t	t	t	t	C	t	C	t	t	t	t	t	t	C	C	t	t	t	t	cds29;Name=YP_008636861.1;Parent=gene36;Dbxref=Genbank:YP_008636861.1,GeneID:17148888;gbkey=CDS;product=hypothetical protein;protein_id=YP_008636861.1;transl_table=11 hypothetical protein (26676-27215 -)	non-silent aag -> Gag;	1713 2064 556 557
NC_022539.1	27055	a	a	a	a	a	a	a	a	a	a	a	a	T	a	T	a	a	a	a	a	a	T	T	a	a	a	a	cds29;Name=YP_008636861.1;Parent=gene36;Dbxref=Genbank:YP_008636861.1,GeneID:17148888;gbkey=CDS;product=hypothetical protein;protein_id=YP_008636861.1;transl_table=11 hypothetical protein (26676-27215 -)	non-silent ttc -> tAc;	1713 2064 556 557
NC_022539.1	27061	a	a	a	a	a	a	a	a	a	a	a	a	T	a	T	a	a	a	a	a	a	T	T	a	a	a	a	cds29;Name=YP_008636861.1;Parent=gene36;Dbxref=Genbank:YP_008636861.1,GeneID:17148888;gbkey=CDS;product=hypothetical protein;protein_id=YP_008636861.1;transl_table=11 hypothetical protein (26676-27215 -)	non-silent ttc -> tAc;	1713 2064 556 557
NC_022539.1	27074	a	a	a	a	a	a	a	a	a	a	a	a	G	a	G	a	a	a	a	a	a	G	G	a	a	a	a	cds29;Name=YP_008636861.1;Parent=gene36;Dbxref=Genbank:YP_008636861.1,GeneID:17148888;gbkey=CDS;product=hypothetical protein;protein_id=YP_008636861.1;transl_table=11 hypothetical protein (26676-27215 -)	silent ttg -> Ctg;	1713 2064 556 557
NC_022539.1	27138	g	g	g	g	g	g	g	g	g	A	g	A	A	g	A	g	g	A	g	g	g	A	A	g	g	g	g	cds29;Name=YP_008636861.1;Parent=gene36;Dbxref=Genbank:YP_008636861.1,GeneID:17148888;gbkey=CDS;product=hypothetical protein;protein_id=YP_008636861.1;transl_table=11 hypothetical protein (26676-27215 -)	silent gac -> gaT;	1646 1680 1713 2064 301 556 557
NC_022539.1	27164	t	t	t	t	t	t	t	t	t	t	t	t	A	t	A	t	t	t	t	t	t	A	A	t	t	t	t	cds29;Name=YP_008636861.1;Parent=gene36;Dbxref=Genbank:YP_008636861.1,GeneID:17148888;gbkey=CDS;product=hypothetical protein;protein_id=YP_008636861.1;transl_table=11 hypothetical protein (26676-27215 -)	non-silent acc -> Tcc;	1713 2064 556 557
NC_022539.1	3486	g	g	g	g	g	g	g	g	g	g	g	g	T	g	T	g	g	g	g	g	g	T	T	g	g	g	g	cds6;Name=YP_008636838.1;Parent=gene6;Dbxref=Genbank:YP_008636838.1,GeneID:17148866;gbkey=CDS;product=hypothetical protein;protein_id=YP_008636838.1;transl_table=11 hypothetical protein (3310-3954 +)	silent gcg -> gcT;	1713 2064 556 557
NC_022539.1	3500	c	c	c	*	c	c	*	c	c	*	c	*	c	*	c	*	c	*	*	c	c	c	c	c	c	c	*	cds6;Name=YP_008636838.1;Parent=gene6;Dbxref=Genbank:YP_008636838.1,GeneID:17148866;gbkey=CDS;product=hypothetical protein;protein_id=YP_008636838.1;transl_table=11 hypothetical protein (3310-3954 +)	non-silent cca -> c*a;	1138 1420 1646 1680 1811 220 301 3035 XCP123
NC_022539.1	37212	g	g	g	g	g	g	g	g	g	g	g	g	g	g	g	g	g	g	g	g	g	A	A	g	g	g	g	cds38;Name=YP_008636870.1;Parent=gene45;Dbxref=Genbank:YP_008636870.1,GeneID:17148897;gbkey=CDS;product=hypothetical protein;protein_id=YP_008636870.1;transl_table=11 hypothetical protein (37020-37841 -)	silent gcc -> gcT;	556 557
NC_022539.1	37212	g	g	g	g	g	g	g	g	g	g	g	g	g	g	C	g	g	g	g	g	g	g	g	g	g	g	g	cds38;Name=YP_008636870.1;Parent=gene45;Dbxref=Genbank:YP_008636870.1,GeneID:17148897;gbkey=CDS;product=hypothetical protein;protein_id=YP_008636870.1;transl_table=11 hypothetical protein (37020-37841 -)	silent gcc -> gcG;	2064
NC_022539.1	37219	t	t	t	t	t	t	t	t	t	t	t	t	t	t	A	t	t	t	t	t	t	t	t	t	t	t	t	cds38;Name=YP_008636870.1;Parent=gene45;Dbxref=Genbank:YP_008636870.1,GeneID:17148897;gbkey=CDS;product=hypothetical protein;protein_id=YP_008636870.1;transl_table=11 hypothetical protein (37020-37841 -)	non-silent aag -> aTg;	2064
NC_022539.1	37224	g	g	g	g	g	g	g	g	g	g	g	g	g	g	A	g	g	g	g	g	g	g	g	g	g	g	g	cds38;Name=YP_008636870.1;Parent=gene45;Dbxref=Genbank:YP_008636870.1,GeneID:17148897;gbkey=CDS;product=hypothetical protein;protein_id=YP_008636870.1;transl_table=11 hypothetical protein (37020-37841 -)	silent gac -> gaT;	2064
NC_022539.1	37245	g	g	g	g	g	g	g	g	g	g	g	g	g	g	C	g	g	g	g	g	g	g	g	g	g	g	g	cds38;Name=YP_008636870.1;Parent=gene45;Dbxref=Genbank:YP_008636870.1,GeneID:17148897;gbkey=CDS;product=hypothetical protein;protein_id=YP_008636870.1;transl_table=11 hypothetical protein (37020-37841 -)	silent acc -> acG;	2064
NC_022539.1	37245	g	g	g	g	g	g	g	g	g	g	g	g	g	g	g	g	g	g	g	g	g	T	T	g	g	g	g	cds38;Name=YP_008636870.1;Parent=gene45;Dbxref=Genbank:YP_008636870.1,GeneID:17148897;gbkey=CDS;product=hypothetical protein;protein_id=YP_008636870.1;transl_table=11 hypothetical protein (37020-37841 -)	silent acc -> acA;	556 557
NC_022539.1	37248	g	g	g	g	g	g	g	g	g	g	g	g	g	g	C	g	g	g	g	g	g	g	g	g	g	g	g	cds38;Name=YP_008636870.1;Parent=gene45;Dbxref=Genbank:YP_008636870.1,GeneID:17148897;gbkey=CDS;product=hypothetical protein;protein_id=YP_008636870.1;transl_table=11 hypothetical protein (37020-37841 -)	silent ggc -> ggG;	2064
NC_022539.1	37253	c	c	c	c	c	c	c	c	c	c	c	c	c	c	T	c	c	c	c	c	c	c	c	c	c	c	c	cds38;Name=YP_008636870.1;Parent=gene45;Dbxref=Genbank:YP_008636870.1,GeneID:17148897;gbkey=CDS;product=hypothetical protein;protein_id=YP_008636870.1;transl_table=11 hypothetical protein (37020-37841 -)	non-silent gcc -> Acc;	2064
NC_022539.1	37265	g	g	g	g	g	g	g	g	g	g	g	g	g	g	A	g	g	g	g	g	g	g	g	g	g	g	g	cds38;Name=YP_008636870.1;Parent=gene45;Dbxref=Genbank:YP_008636870.1,GeneID:17148897;gbkey=CDS;product=hypothetical protein;protein_id=YP_008636870.1;transl_table=11 hypothetical protein (37020-37841 -)	silent cta -> Tta;	2064
NC_022539.1	37272	g	g	g	g	g	g	g	g	g	g	g	g	g	g	C	g	g	g	g	g	g	g	g	g	g	g	g	cds38;Name=YP_008636870.1;Parent=gene45;Dbxref=Genbank:YP_008636870.1,GeneID:17148897;gbkey=CDS;product=hypothetical protein;protein_id=YP_008636870.1;transl_table=11 hypothetical protein (37020-37841 -)	non-silent ttc -> ttG;	2064
NC_022539.1	37275	g	g	g	g	g	g	g	g	g	g	g	g	g	g	A	g	g	g	g	g	g	g	g	g	g	g	g	cds38;Name=YP_008636870.1;Parent=gene45;Dbxref=Genbank:YP_008636870.1,GeneID:17148897;gbkey=CDS;product=hypothetical protein;protein_id=YP_008636870.1;transl_table=11 hypothetical protein (37020-37841 -)	silent aac -> aaT;	2064
NC_022539.1	37278	g	g	g	g	g	g	g	g	g	g	g	g	g	g	C	g	g	g	g	g	g	g	g	g	g	g	g	cds38;Name=YP_008636870.1;Parent=gene45;Dbxref=Genbank:YP_008636870.1,GeneID:17148897;gbkey=CDS;product=hypothetical protein;protein_id=YP_008636870.1;transl_table=11 hypothetical protein (37020-37841 -)	silent ctc -> ctG;	2064
NC_022539.1	37291	c	c	c	c	c	c	c	c	c	c	c	c	c	c	G	c	c	c	c	c	c	c	c	c	c	c	c	cds38;Name=YP_008636870.1;Parent=gene45;Dbxref=Genbank:YP_008636870.1,GeneID:17148897;gbkey=CDS;product=hypothetical protein;protein_id=YP_008636870.1;transl_table=11 hypothetical protein (37020-37841 -)	non-silent ggc -> gCc;	2064
NC_022539.1	37890	a	C	C	C	a	C	C	a	C	C	a	C	C	C	C	C	a	C	C	C	C	C	C	C	C	C	C			1056 1058 1138 1402 1420 1495 1646 1680 1713 1811 2064 220 301 3035 3660 381 556 557 670 X621 X631 XCP123
NC_022539.1	40063	t	t	t	t	t	t	t	t	t	t	t	t	C	t	C	t	t	t	t	t	t	C	C	t	t	t	t			1713 2064 556 557
NC_022539.1	40108	g	g	g	g	g	g	g	g	g	g	g	g	T	g	T	g	g	g	g	g	g	T	T	g	g	g	g			1713 2064 556 557
NC_022539.1	40109	a	a	a	a	a	a	a	a	a	a	a	a	G	a	G	a	a	a	a	a	a	G	G	a	a	a	a			1713 2064 556 557
NC_022539.1	40117	a	a	a	a	a	a	a	a	a	a	a	a	G	a	G	a	a	a	a	a	a	G	G	a	a	a	a			1713 2064 556 557
NC_022539.1	40121	c	c	c	c	c	c	T	c	c	c	c	c	T	T	T	T	c	c	c	c	c	T	T	c	c	c	c			1420 1713 1811 2064 220 556 557
NC_022539.1	40123	t	t	t	t	t	t	G	t	t	t	t	t	G	G	G	G	t	t	t	t	t	G	G	t	t	t	t			1420 1713 1811 2064 220 556 557
NC_022539.1	40171	c	c	c	c	c	c	c	c	c	c	c	c	A	c	A	c	c	c	c	c	c	A	A	c	c	c	c			1713 2064 556 557
NC_022539.1	40185	g	g	g	g	g	g	g	g	g	g	g	g	A	g	A	g	g	g	g	g	g	A	A	g	g	g	g			1713 2064 556 557
NC_022539.1	40191	g	g	g	g	g	g	g	g	g	g	g	g	A	g	A	g	g	g	g	g	g	A	A	g	g	g	g			1713 2064 556 557
NC_022539.1	40270	a	a	a	a	a	a	a	a	a	a	a	a	G	a	G	a	a	a	a	a	a	G	G	a	a	a	a			1713 2064 556 557
NC_022539.1	40286	c	c	c	c	c	c	c	c	c	c	c	c	T	c	T	c	c	c	c	c	c	T	T	c	c	c	c			1713 2064 556 557
NC_022539.1	40308	a	a	a	a	a	a	a	a	a	a	a	a	G	a	G	a	a	a	a	a	a	G	G	a	a	a	a			1713 2064 556 557
NC_022539.1	40312	a	a	a	a	a	a	a	a	a	a	a	a	G	a	G	a	a	a	a	a	a	G	G	a	a	a	a			1713 2064 556 557
NC_022539.1	40330	g	g	g	g	g	g	g	g	g	g	g	g	A	g	A	g	g	g	g	g	g	A	A	g	g	g	g			1713 2064 556 557
NC_022539.1	40371	g	g	g	g	g	g	g	g	g	g	g	g	T	g	T	g	g	g	g	g	g	T	T	g	g	g	g			1713 2064 556 557
NC_022539.1	40373	g	g	g	g	g	g	g	g	g	g	g	g	T	g	T	g	g	g	g	g	g	T	T	g	g	g	g			1713 2064 556 557
NC_022539.1	40388	a	a	a	a	a	a	a	a	a	a	a	a	G	a	G	a	a	a	a	a	a	G	G	a	a	a	a			1713 2064 556 557
NC_022539.1	40414	a	a	a	a	a	a	a	a	a	a	a	a	G	a	G	a	a	a	a	a	a	G	G	a	a	a	a			1713 2064 556 557
NC_022539.1	40429	a	a	a	a	a	a	a	a	a	a	a	a	G	a	G	a	a	a	a	a	a	G	G	a	a	a	a			1713 2064 556 557
NC_022539.1	40435	t	t	t	t	t	t	t	t	t	t	t	t	G	t	G	t	t	t	t	t	t	G	G	t	t	t	t			1713 2064 556 557
NC_022539.1	40438	c	c	c	c	c	c	c	c	c	c	c	c	G	c	G	c	c	c	c	c	c	G	G	c	c	c	c			1713 2064 556 557
NC_022539.1	40441	g	g	g	g	g	g	g	g	g	g	g	g	A	g	A	g	g	g	g	g	g	A	A	g	g	g	g			1713 2064 556 557
NC_022539.1	40544	t	t	t	t	t	t	t	t	t	t	t	t	C	t	C	t	t	t	t	t	t	C	C	t	t	t	t	cds43;Name=YP_008636875.1;Parent=gene50;Dbxref=Genbank:YP_008636875.1,GeneID:17148902;gbkey=CDS;gene=xfutal1;product=probable avirulence avrBs3%2Fpth family protein%2C type III effector%2C TAL effector Xfutal1;protein_id=YP_008636875.1;transl_table=11 probable avirulence avrBs3%2Fpth family protein%2C type III effector%2C TAL effector Xfutal1 (40541-45205 +)	non-silent tct -> Cct;	1713 2064 556 557
NC_022539.1	40586	g	g	g	g	g	g	g	g	g	g	g	g	T	g	T	g	g	g	g	g	g	T	T	g	g	g	g	cds43;Name=YP_008636875.1;Parent=gene50;Dbxref=Genbank:YP_008636875.1,GeneID:17148902;gbkey=CDS;gene=xfutal1;product=probable avirulence avrBs3%2Fpth family protein%2C type III effector%2C TAL effector Xfutal1;protein_id=YP_008636875.1;transl_table=11 probable avirulence avrBs3%2Fpth family protein%2C type III effector%2C TAL effector Xfutal1 (40541-45205 +)	non-silent ggg -> Tgg;	1713 2064 556 557
NC_022539.1	40629	a	a	a	a	a	a	a	a	a	a	a	a	C	a	C	a	a	a	a	a	a	C	C	a	a	a	a	cds43;Name=YP_008636875.1;Parent=gene50;Dbxref=Genbank:YP_008636875.1,GeneID:17148902;gbkey=CDS;gene=xfutal1;product=probable avirulence avrBs3%2Fpth family protein%2C type III effector%2C TAL effector Xfutal1;protein_id=YP_008636875.1;transl_table=11 probable avirulence avrBs3%2Fpth family protein%2C type III effector%2C TAL effector Xfutal1 (40541-45205 +)	non-silent caa -> cCa;	1713 2064 556 557
NC_022539.1	40631	g	g	g	g	g	g	g	g	g	g	g	g	C	g	C	g	g	g	g	g	g	C	C	g	g	g	g	cds43;Name=YP_008636875.1;Parent=gene50;Dbxref=Genbank:YP_008636875.1,GeneID:17148902;gbkey=CDS;gene=xfutal1;product=probable avirulence avrBs3%2Fpth family protein%2C type III effector%2C TAL effector Xfutal1;protein_id=YP_008636875.1;transl_table=11 probable avirulence avrBs3%2Fpth family protein%2C type III effector%2C TAL effector Xfutal1 (40541-45205 +)	non-silent gcc -> Ccc;	1713 2064 556 557
NC_022539.1	40641	a	a	a	a	a	a	a	a	a	a	a	a	G	a	G	a	a	a	a	a	a	G	G	a	a	a	a	cds43;Name=YP_008636875.1;Parent=gene50;Dbxref=Genbank:YP_008636875.1,GeneID:17148902;gbkey=CDS;gene=xfutal1;product=probable avirulence avrBs3%2Fpth family protein%2C type III effector%2C TAL effector Xfutal1;protein_id=YP_008636875.1;transl_table=11 probable avirulence avrBs3%2Fpth family protein%2C type III effector%2C TAL effector Xfutal1 (40541-45205 +)	non-silent cag -> cGg;	1713 2064 556 557
NC_022539.1	40651	g	g	g	g	g	g	g	g	g	g	g	g	C	g	C	g	g	g	g	g	g	C	C	g	g	g	g	cds43;Name=YP_008636875.1;Parent=gene50;Dbxref=Genbank:YP_008636875.1,GeneID:17148902;gbkey=CDS;gene=xfutal1;product=probable avirulence avrBs3%2Fpth family protein%2C type III effector%2C TAL effector Xfutal1;protein_id=YP_008636875.1;transl_table=11 probable avirulence avrBs3%2Fpth family protein%2C type III effector%2C TAL effector Xfutal1 (40541-45205 +)	silent gtg -> gtC;	1713 2064 556 557
NC_022539.1	40663	a	a	a	a	a	a	a	a	a	a	a	a	G	a	G	a	a	a	a	a	a	G	G	a	a	a	a	cds43;Name=YP_008636875.1;Parent=gene50;Dbxref=Genbank:YP_008636875.1,GeneID:17148902;gbkey=CDS;gene=xfutal1;product=probable avirulence avrBs3%2Fpth family protein%2C type III effector%2C TAL effector Xfutal1;protein_id=YP_008636875.1;transl_table=11 probable avirulence avrBs3%2Fpth family protein%2C type III effector%2C TAL effector Xfutal1 (40541-45205 +)	silent cga -> cgG;	1713 2064 556 557
NC_022539.1	40683	t	t	t	t	t	t	t	t	t	t	t	t	C	t	C	t	t	t	t	t	t	C	C	t	t	t	t	cds43;Name=YP_008636875.1;Parent=gene50;Dbxref=Genbank:YP_008636875.1,GeneID:17148902;gbkey=CDS;gene=xfutal1;product=probable avirulence avrBs3%2Fpth family protein%2C type III effector%2C TAL effector Xfutal1;protein_id=YP_008636875.1;transl_table=11 probable avirulence avrBs3%2Fpth family protein%2C type III effector%2C TAL effector Xfutal1 (40541-45205 +)	non-silent gtg -> gCg;	1713 2064 556 557
NC_022539.1	40705	c	c	c	c	c	c	c	c	c	c	c	c	A	c	A	c	c	c	c	c	c	A	A	c	c	c	c	cds43;Name=YP_008636875.1;Parent=gene50;Dbxref=Genbank:YP_008636875.1,GeneID:17148902;gbkey=CDS;gene=xfutal1;product=probable avirulence avrBs3%2Fpth family protein%2C type III effector%2C TAL effector Xfutal1;protein_id=YP_008636875.1;transl_table=11 probable avirulence avrBs3%2Fpth family protein%2C type III effector%2C TAL effector Xfutal1 (40541-45205 +)	non-silent cac -> caA;	1713 2064 556 557
NC_022539.1	40706	a	a	a	a	a	a	a	a	a	a	a	a	C	a	C	a	a	a	a	a	a	C	C	a	a	a	a	cds43;Name=YP_008636875.1;Parent=gene50;Dbxref=Genbank:YP_008636875.1,GeneID:17148902;gbkey=CDS;gene=xfutal1;product=probable avirulence avrBs3%2Fpth family protein%2C type III effector%2C TAL effector Xfutal1;protein_id=YP_008636875.1;transl_table=11 probable avirulence avrBs3%2Fpth family protein%2C type III effector%2C TAL effector Xfutal1 (40541-45205 +)	non-silent acc -> Ccc;	1713 2064 556 557
NC_022539.1	40711	t	t	t	t	t	t	t	t	t	t	t	t	C	t	C	t	t	t	t	t	t	C	C	t	t	t	t	cds43;Name=YP_008636875.1;Parent=gene50;Dbxref=Genbank:YP_008636875.1,GeneID:17148902;gbkey=CDS;gene=xfutal1;product=probable avirulence avrBs3%2Fpth family protein%2C type III effector%2C TAL effector Xfutal1;protein_id=YP_008636875.1;transl_table=11 probable avirulence avrBs3%2Fpth family protein%2C type III effector%2C TAL effector Xfutal1 (40541-45205 +)	silent tct -> tcC;	1713 2064 556 557
NC_022539.1	40728	g	g	g	g	g	g	g	g	g	g	g	g	C	g	C	g	g	g	g	g	g	C	C	g	g	g	g	cds43;Name=YP_008636875.1;Parent=gene50;Dbxref=Genbank:YP_008636875.1,GeneID:17148902;gbkey=CDS;gene=xfutal1;product=probable avirulence avrBs3%2Fpth family protein%2C type III effector%2C TAL effector Xfutal1;protein_id=YP_008636875.1;transl_table=11 probable avirulence avrBs3%2Fpth family protein%2C type III effector%2C TAL effector Xfutal1 (40541-45205 +)	non-silent ggg -> gCg;	1713 2064 556 557
NC_022539.1	40735	c	c	c	c	c	c	c	c	c	c	c	c	G	c	G	c	c	c	c	c	c	G	G	c	c	c	c	cds43;Name=YP_008636875.1;Parent=gene50;Dbxref=Genbank:YP_008636875.1,GeneID:17148902;gbkey=CDS;gene=xfutal1;product=probable avirulence avrBs3%2Fpth family protein%2C type III effector%2C TAL effector Xfutal1;protein_id=YP_008636875.1;transl_table=11 probable avirulence avrBs3%2Fpth family protein%2C type III effector%2C TAL effector Xfutal1 (40541-45205 +)	silent gtc -> gtG;	1713 2064 556 557
NC_022539.1	40768	g	g	g	g	g	g	g	g	g	g	g	g	A	g	A	g	g	g	g	g	g	A	A	g	g	g	g	cds43;Name=YP_008636875.1;Parent=gene50;Dbxref=Genbank:YP_008636875.1,GeneID:17148902;gbkey=CDS;gene=xfutal1;product=probable avirulence avrBs3%2Fpth family protein%2C type III effector%2C TAL effector Xfutal1;protein_id=YP_008636875.1;transl_table=11 probable avirulence avrBs3%2Fpth family protein%2C type III effector%2C TAL effector Xfutal1 (40541-45205 +)	silent cag -> caA;	1713 2064 556 557
NC_022539.1	40771	a	a	a	a	a	a	a	a	a	a	a	a	G	a	G	a	a	a	a	a	a	G	G	a	a	a	a	cds43;Name=YP_008636875.1;Parent=gene50;Dbxref=Genbank:YP_008636875.1,GeneID:17148902;gbkey=CDS;gene=xfutal1;product=probable avirulence avrBs3%2Fpth family protein%2C type III effector%2C TAL effector Xfutal1;protein_id=YP_008636875.1;transl_table=11 probable avirulence avrBs3%2Fpth family protein%2C type III effector%2C TAL effector Xfutal1 (40541-45205 +)	silent caa -> caG;	1713 2064 556 557
NC_022539.1	40785	t	t	t	t	t	t	t	t	t	t	t	t	C	t	C	t	t	t	t	t	t	C	C	t	t	t	t	cds43;Name=YP_008636875.1;Parent=gene50;Dbxref=Genbank:YP_008636875.1,GeneID:17148902;gbkey=CDS;gene=xfutal1;product=probable avirulence avrBs3%2Fpth family protein%2C type III effector%2C TAL effector Xfutal1;protein_id=YP_008636875.1;transl_table=11 probable avirulence avrBs3%2Fpth family protein%2C type III effector%2C TAL effector Xfutal1 (40541-45205 +)	non-silent ctg -> cCg;	1713 2064 556 557
NC_022539.1	40804	a	a	a	a	a	a	a	a	a	a	a	a	G	a	G	a	a	a	a	a	a	G	G	a	a	a	a	cds43;Name=YP_008636875.1;Parent=gene50;Dbxref=Genbank:YP_008636875.1,GeneID:17148902;gbkey=CDS;gene=xfutal1;product=probable avirulence avrBs3%2Fpth family protein%2C type III effector%2C TAL effector Xfutal1;protein_id=YP_008636875.1;transl_table=11 probable avirulence avrBs3%2Fpth family protein%2C type III effector%2C TAL effector Xfutal1 (40541-45205 +)	silent gta -> gtG;	1713 2064 556 557
NC_022539.1	40807	a	a	a	a	a	a	a	a	a	a	a	a	G	a	G	a	a	a	a	a	a	G	G	a	a	a	a	cds43;Name=YP_008636875.1;Parent=gene50;Dbxref=Genbank:YP_008636875.1,GeneID:17148902;gbkey=CDS;gene=xfutal1;product=probable avirulence avrBs3%2Fpth family protein%2C type III effector%2C TAL effector Xfutal1;protein_id=YP_008636875.1;transl_table=11 probable avirulence avrBs3%2Fpth family protein%2C type III effector%2C TAL effector Xfutal1 (40541-45205 +)	silent gca -> gcG;	1713 2064 556 557
NC_022539.1	40826	a	a	a	a	a	a	a	a	a	a	a	a	G	a	G	a	a	a	a	a	a	G	G	a	a	a	a	cds43;Name=YP_008636875.1;Parent=gene50;Dbxref=Genbank:YP_008636875.1,GeneID:17148902;gbkey=CDS;gene=xfutal1;product=probable avirulence avrBs3%2Fpth family protein%2C type III effector%2C TAL effector Xfutal1;protein_id=YP_008636875.1;transl_table=11 probable avirulence avrBs3%2Fpth family protein%2C type III effector%2C TAL effector Xfutal1 (40541-45205 +)	non-silent atc -> Gtc;	1713 2064 556 557
NC_022539.1	40845	g	g	g	g	g	g	g	g	g	g	g	g	A	g	A	g	g	g	g	g	g	A	A	g	g	g	g	cds43;Name=YP_008636875.1;Parent=gene50;Dbxref=Genbank:YP_008636875.1,GeneID:17148902;gbkey=CDS;gene=xfutal1;product=probable avirulence avrBs3%2Fpth family protein%2C type III effector%2C TAL effector Xfutal1;protein_id=YP_008636875.1;transl_table=11 probable avirulence avrBs3%2Fpth family protein%2C type III effector%2C TAL effector Xfutal1 (40541-45205 +)	non-silent cgt -> cAt;	1713 2064 556 557
NC_022539.1	40846	t	t	t	t	t	t	t	t	t	t	t	t	C	t	C	t	t	t	t	t	t	C	C	t	t	t	t	cds43;Name=YP_008636875.1;Parent=gene50;Dbxref=Genbank:YP_008636875.1,GeneID:17148902;gbkey=CDS;gene=xfutal1;product=probable avirulence avrBs3%2Fpth family protein%2C type III effector%2C TAL effector Xfutal1;protein_id=YP_008636875.1;transl_table=11 probable avirulence avrBs3%2Fpth family protein%2C type III effector%2C TAL effector Xfutal1 (40541-45205 +)	silent cgt -> cgC;	1713 2064 556 557
NC_022539.1	40852	a	a	a	a	a	a	a	a	a	a	a	a	C	a	C	a	a	a	a	a	a	C	C	a	a	a	a	cds43;Name=YP_008636875.1;Parent=gene50;Dbxref=Genbank:YP_008636875.1,GeneID:17148902;gbkey=CDS;gene=xfutal1;product=probable avirulence avrBs3%2Fpth family protein%2C type III effector%2C TAL effector Xfutal1;protein_id=YP_008636875.1;transl_table=11 probable avirulence avrBs3%2Fpth family protein%2C type III effector%2C TAL effector Xfutal1 (40541-45205 +)	non-silent caa -> caC;	1713 2064 556 557
NC_022539.1	40882	c	c	c	c	c	c	c	c	c	c	c	c	G	c	G	c	c	c	c	c	c	G	G	c	c	c	c	cds43;Name=YP_008636875.1;Parent=gene50;Dbxref=Genbank:YP_008636875.1,GeneID:17148902;gbkey=CDS;gene=xfutal1;product=probable avirulence avrBs3%2Fpth family protein%2C type III effector%2C TAL effector Xfutal1;protein_id=YP_008636875.1;transl_table=11 probable avirulence avrBs3%2Fpth family protein%2C type III effector%2C TAL effector Xfutal1 (40541-45205 +)	silent gcc -> gcG;	1713 2064 556 557
NC_022539.1	40906	c	c	c	c	c	c	c	c	c	c	c	c	T	c	T	c	c	c	c	c	c	T	T	c	c	c	c	cds43;Name=YP_008636875.1;Parent=gene50;Dbxref=Genbank:YP_008636875.1,GeneID:17148902;gbkey=CDS;gene=xfutal1;product=probable avirulence avrBs3%2Fpth family protein%2C type III effector%2C TAL effector Xfutal1;protein_id=YP_008636875.1;transl_table=11 probable avirulence avrBs3%2Fpth family protein%2C type III effector%2C TAL effector Xfutal1 (40541-45205 +)	silent tac -> taT;	1713 2064 556 557
NC_022539.1	40911	t	t	t	t	t	t	t	t	t	t	t	t	A	t	A	t	t	t	t	t	t	A	A	t	t	t	t	cds43;Name=YP_008636875.1;Parent=gene50;Dbxref=Genbank:YP_008636875.1,GeneID:17148902;gbkey=CDS;gene=xfutal1;product=probable avirulence avrBs3%2Fpth family protein%2C type III effector%2C TAL effector Xfutal1;protein_id=YP_008636875.1;transl_table=11 probable avirulence avrBs3%2Fpth family protein%2C type III effector%2C TAL effector Xfutal1 (40541-45205 +)	non-silent gtc -> gAc;	1713 2064 556 557
NC_022539.1	40921	g	g	g	g	g	g	g	g	g	g	g	g	A	g	A	g	g	g	g	g	g	A	A	g	g	g	g	cds43;Name=YP_008636875.1;Parent=gene50;Dbxref=Genbank:YP_008636875.1,GeneID:17148902;gbkey=CDS;gene=xfutal1;product=probable avirulence avrBs3%2Fpth family protein%2C type III effector%2C TAL effector Xfutal1;protein_id=YP_008636875.1;transl_table=11 probable avirulence avrBs3%2Fpth family protein%2C type III effector%2C TAL effector Xfutal1 (40541-45205 +)	silent gcg -> gcA;	1713 2064 556 557
NC_022539.1	40930	g	g	g	g	g	g	g	g	g	g	g	g	A	g	A	g	g	g	g	g	g	A	A	g	g	g	g	cds43;Name=YP_008636875.1;Parent=gene50;Dbxref=Genbank:YP_008636875.1,GeneID:17148902;gbkey=CDS;gene=xfutal1;product=probable avirulence avrBs3%2Fpth family protein%2C type III effector%2C TAL effector Xfutal1;protein_id=YP_008636875.1;transl_table=11 probable avirulence avrBs3%2Fpth family protein%2C type III effector%2C TAL effector Xfutal1 (40541-45205 +)	silent ccg -> ccA;	1713 2064 556 557
NC_022539.1	40993	a	a	a	a	a	a	a	a	a	a	a	a	G	a	G	a	a	a	a	a	a	G	G	a	a	a	a	cds43;Name=YP_008636875.1;Parent=gene50;Dbxref=Genbank:YP_008636875.1,GeneID:17148902;gbkey=CDS;gene=xfutal1;product=probable avirulence avrBs3%2Fpth family protein%2C type III effector%2C TAL effector Xfutal1;protein_id=YP_008636875.1;transl_table=11 probable avirulence avrBs3%2Fpth family protein%2C type III effector%2C TAL effector Xfutal1 (40541-45205 +)	silent gaa -> gaG;	1713 2064 556 557
NC_022539.1	40996	a	a	a	a	a	a	a	a	a	a	a	a	C	a	C	a	a	a	a	a	a	C	C	a	a	a	a	cds43;Name=YP_008636875.1;Parent=gene50;Dbxref=Genbank:YP_008636875.1,GeneID:17148902;gbkey=CDS;gene=xfutal1;product=probable avirulence avrBs3%2Fpth family protein%2C type III effector%2C TAL effector Xfutal1;protein_id=YP_008636875.1;transl_table=11 probable avirulence avrBs3%2Fpth family protein%2C type III effector%2C TAL effector Xfutal1 (40541-45205 +)	silent gca -> gcC;	1713 2064 556 557
NC_022539.1	41009	t	t	t	t	t	t	t	t	t	t	t	t	G	t	G	t	t	t	t	t	t	G	G	t	t	t	t	cds43;Name=YP_008636875.1;Parent=gene50;Dbxref=Genbank:YP_008636875.1,GeneID:17148902;gbkey=CDS;gene=xfutal1;product=probable avirulence avrBs3%2Fpth family protein%2C type III effector%2C TAL effector Xfutal1;protein_id=YP_008636875.1;transl_table=11 probable avirulence avrBs3%2Fpth family protein%2C type III effector%2C TAL effector Xfutal1 (40541-45205 +)	non-silent tcg -> Gcg;	1713 2064 556 557
NC_022539.1	41050	t	t	t	t	t	t	t	t	t	t	t	t	C	t	C	t	t	t	t	t	t	C	C	t	t	t	t	cds43;Name=YP_008636875.1;Parent=gene50;Dbxref=Genbank:YP_008636875.1,GeneID:17148902;gbkey=CDS;gene=xfutal1;product=probable avirulence avrBs3%2Fpth family protein%2C type III effector%2C TAL effector Xfutal1;protein_id=YP_008636875.1;transl_table=11 probable avirulence avrBs3%2Fpth family protein%2C type III effector%2C TAL effector Xfutal1 (40541-45205 +)	silent ggt -> ggC;	1713 2064 556 557
NC_022539.1	41101	a	a	a	a	a	a	a	a	a	a	a	a	G	a	G	a	a	a	a	a	a	G	G	a	a	a	a	cds43;Name=YP_008636875.1;Parent=gene50;Dbxref=Genbank:YP_008636875.1,GeneID:17148902;gbkey=CDS;gene=xfutal1;product=probable avirulence avrBs3%2Fpth family protein%2C type III effector%2C TAL effector Xfutal1;protein_id=YP_008636875.1;transl_table=11 probable avirulence avrBs3%2Fpth family protein%2C type III effector%2C TAL effector Xfutal1 (40541-45205 +)	silent gta -> gtG;	1713 2064 556 557
NC_022539.1	41128	c	c	c	c	c	c	c	c	c	c	c	c	T	c	T	c	c	c	c	c	c	T	T	c	c	c	c	cds43;Name=YP_008636875.1;Parent=gene50;Dbxref=Genbank:YP_008636875.1,GeneID:17148902;gbkey=CDS;gene=xfutal1;product=probable avirulence avrBs3%2Fpth family protein%2C type III effector%2C TAL effector Xfutal1;protein_id=YP_008636875.1;transl_table=11 probable avirulence avrBs3%2Fpth family protein%2C type III effector%2C TAL effector Xfutal1 (40541-45205 +)	silent ggc -> ggT;	1713 2064 556 557
NC_022539.1	41231	g	g	g	g	g	g	g	g	g	g	g	g	C	g	C	g	g	g	g	g	g	C	C	g	g	g	g	cds43;Name=YP_008636875.1;Parent=gene50;Dbxref=Genbank:YP_008636875.1,GeneID:17148902;gbkey=CDS;gene=xfutal1;product=probable avirulence avrBs3%2Fpth family protein%2C type III effector%2C TAL effector Xfutal1;protein_id=YP_008636875.1;transl_table=11 probable avirulence avrBs3%2Fpth family protein%2C type III effector%2C TAL effector Xfutal1 (40541-45205 +)	non-silent gag -> Cag;	1713 2064 556 557
NC_022539.1	41234	c	c	c	c	c	c	c	c	c	c	c	c	G	c	G	c	c	c	c	c	c	G	G	c	c	c	c	cds43;Name=YP_008636875.1;Parent=gene50;Dbxref=Genbank:YP_008636875.1,GeneID:17148902;gbkey=CDS;gene=xfutal1;product=probable avirulence avrBs3%2Fpth family protein%2C type III effector%2C TAL effector Xfutal1;protein_id=YP_008636875.1;transl_table=11 probable avirulence avrBs3%2Fpth family protein%2C type III effector%2C TAL effector Xfutal1 (40541-45205 +)	non-silent caa -> Gaa;	1713 2064 556 557
NC_022539.1	41235	a	a	a	a	a	a	a	a	a	a	a	a	C	a	C	a	a	a	a	a	a	C	C	a	a	a	a	cds43;Name=YP_008636875.1;Parent=gene50;Dbxref=Genbank:YP_008636875.1,GeneID:17148902;gbkey=CDS;gene=xfutal1;product=probable avirulence avrBs3%2Fpth family protein%2C type III effector%2C TAL effector Xfutal1;protein_id=YP_008636875.1;transl_table=11 probable avirulence avrBs3%2Fpth family protein%2C type III effector%2C TAL effector Xfutal1 (40541-45205 +)	non-silent caa -> cCa;	1713 2064 556 557
NC_022539.1	41236	a	a	a	a	a	a	a	a	a	a	a	a	C	a	C	a	a	a	a	a	a	C	C	a	a	a	a	cds43;Name=YP_008636875.1;Parent=gene50;Dbxref=Genbank:YP_008636875.1,GeneID:17148902;gbkey=CDS;gene=xfutal1;product=probable avirulence avrBs3%2Fpth family protein%2C type III effector%2C TAL effector Xfutal1;protein_id=YP_008636875.1;transl_table=11 probable avirulence avrBs3%2Fpth family protein%2C type III effector%2C TAL effector Xfutal1 (40541-45205 +)	non-silent caa -> caC;	1713 2064 556 557
NC_022539.1	42613	a	C	C	C	C	C	C	C	C	C	C	C	C	C	C	C	C	C	C	C	C	C	C	C	C	C	C	cds43;Name=YP_008636875.1;Parent=gene50;Dbxref=Genbank:YP_008636875.1,GeneID:17148902;gbkey=CDS;gene=xfutal1;product=probable avirulence avrBs3%2Fpth family protein%2C type III effector%2C TAL effector Xfutal1;protein_id=YP_008636875.1;transl_table=11 probable avirulence avrBs3%2Fpth family protein%2C type III effector%2C TAL effector Xfutal1 (40541-45205 +)	silent gga -> ggC;	1056 1058 1138 1158 1402 1420 1433 1495 1646 1654 1680 1713 1811 2064 220 2665 301 3035 3660 381 556 557 670 X621 X631 XCP123
NC_022539.1	44287	g	g	g	g	g	g	g	g	g	g	g	g	g	g	g	g	g	g	g	g	A	g	g	g	g	g	g	cds43;Name=YP_008636875.1;Parent=gene50;Dbxref=Genbank:YP_008636875.1,GeneID:17148902;gbkey=CDS;gene=xfutal1;product=probable avirulence avrBs3%2Fpth family protein%2C type III effector%2C TAL effector Xfutal1;protein_id=YP_008636875.1;transl_table=11 probable avirulence avrBs3%2Fpth family protein%2C type III effector%2C TAL effector Xfutal1 (40541-45205 +)	silent ctg -> ctA;	381
NC_022539.1	44336	a	a	a	C	a	a	C	a	a	a	a	a	a	C	a	C	a	a	C	a	a	a	a	a	a	a	C	cds43;Name=YP_008636875.1;Parent=gene50;Dbxref=Genbank:YP_008636875.1,GeneID:17148902;gbkey=CDS;gene=xfutal1;product=probable avirulence avrBs3%2Fpth family protein%2C type III effector%2C TAL effector Xfutal1;protein_id=YP_008636875.1;transl_table=11 probable avirulence avrBs3%2Fpth family protein%2C type III effector%2C TAL effector Xfutal1 (40541-45205 +)	non-silent aat -> Cat;	1138 1420 1811 220 3035 XCP123
NC_022539.1	44394	a	a	a	a	a	a	a	a	a	a	a	a	C	a	C	a	a	a	a	a	a	C	C	a	a	a	a	cds43;Name=YP_008636875.1;Parent=gene50;Dbxref=Genbank:YP_008636875.1,GeneID:17148902;gbkey=CDS;gene=xfutal1;product=probable avirulence avrBs3%2Fpth family protein%2C type III effector%2C TAL effector Xfutal1;protein_id=YP_008636875.1;transl_table=11 probable avirulence avrBs3%2Fpth family protein%2C type III effector%2C TAL effector Xfutal1 (40541-45205 +)	non-silent cag -> cCg;	1713 2064 556 557
NC_022539.1	44404	c	c	c	c	c	c	c	c	c	c	c	c	c	c	c	c	c	c	c	c	T	c	c	c	c	c	c	cds43;Name=YP_008636875.1;Parent=gene50;Dbxref=Genbank:YP_008636875.1,GeneID:17148902;gbkey=CDS;gene=xfutal1;product=probable avirulence avrBs3%2Fpth family protein%2C type III effector%2C TAL effector Xfutal1;protein_id=YP_008636875.1;transl_table=11 probable avirulence avrBs3%2Fpth family protein%2C type III effector%2C TAL effector Xfutal1 (40541-45205 +)	silent gcc -> gcT;	381
NC_022539.1	44449	g	g	g	g	g	g	g	g	g	g	g	g	A	g	A	g	g	g	g	g	g	A	A	g	g	g	g	cds43;Name=YP_008636875.1;Parent=gene50;Dbxref=Genbank:YP_008636875.1,GeneID:17148902;gbkey=CDS;gene=xfutal1;product=probable avirulence avrBs3%2Fpth family protein%2C type III effector%2C TAL effector Xfutal1;protein_id=YP_008636875.1;transl_table=11 probable avirulence avrBs3%2Fpth family protein%2C type III effector%2C TAL effector Xfutal1 (40541-45205 +)	silent ggg -> ggA;	1713 2064 556 557
NC_022539.1	44464	g	g	g	g	g	g	g	g	g	g	g	g	T	g	T	g	g	g	g	g	g	T	T	g	g	g	g	cds43;Name=YP_008636875.1;Parent=gene50;Dbxref=Genbank:YP_008636875.1,GeneID:17148902;gbkey=CDS;gene=xfutal1;product=probable avirulence avrBs3%2Fpth family protein%2C type III effector%2C TAL effector Xfutal1;protein_id=YP_008636875.1;transl_table=11 probable avirulence avrBs3%2Fpth family protein%2C type III effector%2C TAL effector Xfutal1 (40541-45205 +)	non-silent gag -> gaT;	1713 2064 556 557
NC_022539.1	44522	c	c	c	c	c	c	c	c	c	c	c	c	A	c	A	c	c	c	c	c	c	A	A	c	c	c	c	cds43;Name=YP_008636875.1;Parent=gene50;Dbxref=Genbank:YP_008636875.1,GeneID:17148902;gbkey=CDS;gene=xfutal1;product=probable avirulence avrBs3%2Fpth family protein%2C type III effector%2C TAL effector Xfutal1;protein_id=YP_008636875.1;transl_table=11 probable avirulence avrBs3%2Fpth family protein%2C type III effector%2C TAL effector Xfutal1 (40541-45205 +)	non-silent ctt -> Att;	1713 2064 556 557
NC_022539.1	44602	t	t	t	t	t	t	t	t	t	t	t	t	C	t	C	t	t	t	t	t	t	C	C	t	t	t	t	cds43;Name=YP_008636875.1;Parent=gene50;Dbxref=Genbank:YP_008636875.1,GeneID:17148902;gbkey=CDS;gene=xfutal1;product=probable avirulence avrBs3%2Fpth family protein%2C type III effector%2C TAL effector Xfutal1;protein_id=YP_008636875.1;transl_table=11 probable avirulence avrBs3%2Fpth family protein%2C type III effector%2C TAL effector Xfutal1 (40541-45205 +)	silent cat -> caC;	1713 2064 556 557
NC_022539.1	44623	a	a	a	a	a	a	a	a	a	a	a	a	C	a	C	a	a	a	a	a	a	C	C	a	a	a	a	cds43;Name=YP_008636875.1;Parent=gene50;Dbxref=Genbank:YP_008636875.1,GeneID:17148902;gbkey=CDS;gene=xfutal1;product=probable avirulence avrBs3%2Fpth family protein%2C type III effector%2C TAL effector Xfutal1;protein_id=YP_008636875.1;transl_table=11 probable avirulence avrBs3%2Fpth family protein%2C type III effector%2C TAL effector Xfutal1 (40541-45205 +)	non-silent gaa -> gaC;	1713 2064 556 557
NC_022539.1	44668	a	a	a	a	a	a	a	a	a	a	a	a	C	a	C	a	a	a	a	a	a	C	C	a	a	a	a	cds43;Name=YP_008636875.1;Parent=gene50;Dbxref=Genbank:YP_008636875.1,GeneID:17148902;gbkey=CDS;gene=xfutal1;product=probable avirulence avrBs3%2Fpth family protein%2C type III effector%2C TAL effector Xfutal1;protein_id=YP_008636875.1;transl_table=11 probable avirulence avrBs3%2Fpth family protein%2C type III effector%2C TAL effector Xfutal1 (40541-45205 +)	silent cta -> ctC;	1713 2064 556 557
NC_022539.1	44698	g	g	g	g	g	g	g	g	g	g	g	g	A	g	A	g	g	g	g	g	g	A	A	g	g	g	g	cds43;Name=YP_008636875.1;Parent=gene50;Dbxref=Genbank:YP_008636875.1,GeneID:17148902;gbkey=CDS;gene=xfutal1;product=probable avirulence avrBs3%2Fpth family protein%2C type III effector%2C TAL effector Xfutal1;protein_id=YP_008636875.1;transl_table=11 probable avirulence avrBs3%2Fpth family protein%2C type III effector%2C TAL effector Xfutal1 (40541-45205 +)	silent gag -> gaA;	1713 2064 556 557
NC_022539.1	44726	c	c	c	c	c	c	c	c	c	c	c	c	T	c	T	c	c	c	c	c	c	T	T	c	c	c	c	cds43;Name=YP_008636875.1;Parent=gene50;Dbxref=Genbank:YP_008636875.1,GeneID:17148902;gbkey=CDS;gene=xfutal1;product=probable avirulence avrBs3%2Fpth family protein%2C type III effector%2C TAL effector Xfutal1;protein_id=YP_008636875.1;transl_table=11 probable avirulence avrBs3%2Fpth family protein%2C type III effector%2C TAL effector Xfutal1 (40541-45205 +)	non-silent ccg -> Tcg;	1713 2064 556 557
NC_022539.1	44738	c	c	c	c	c	c	c	c	c	c	c	c	G	c	G	c	c	c	c	c	c	G	G	c	c	c	c	cds43;Name=YP_008636875.1;Parent=gene50;Dbxref=Genbank:YP_008636875.1,GeneID:17148902;gbkey=CDS;gene=xfutal1;product=probable avirulence avrBs3%2Fpth family protein%2C type III effector%2C TAL effector Xfutal1;protein_id=YP_008636875.1;transl_table=11 probable avirulence avrBs3%2Fpth family protein%2C type III effector%2C TAL effector Xfutal1 (40541-45205 +)	non-silent cac -> Gac;	1713 2064 556 557
NC_022539.1	44774	g	g	g	g	g	g	g	g	g	g	g	g	A	g	A	g	g	g	g	g	g	A	A	g	g	g	g	cds43;Name=YP_008636875.1;Parent=gene50;Dbxref=Genbank:YP_008636875.1,GeneID:17148902;gbkey=CDS;gene=xfutal1;product=probable avirulence avrBs3%2Fpth family protein%2C type III effector%2C TAL effector Xfutal1;protein_id=YP_008636875.1;transl_table=11 probable avirulence avrBs3%2Fpth family protein%2C type III effector%2C TAL effector Xfutal1 (40541-45205 +)	non-silent gaa -> Aaa;	1713 2064 556 557
NC_022539.1	44783	g	g	g	g	g	g	g	g	g	g	g	g	C	g	C	g	g	g	g	g	g	C	C	g	g	g	g	cds43;Name=YP_008636875.1;Parent=gene50;Dbxref=Genbank:YP_008636875.1,GeneID:17148902;gbkey=CDS;gene=xfutal1;product=probable avirulence avrBs3%2Fpth family protein%2C type III effector%2C TAL effector Xfutal1;protein_id=YP_008636875.1;transl_table=11 probable avirulence avrBs3%2Fpth family protein%2C type III effector%2C TAL effector Xfutal1 (40541-45205 +)	non-silent ggt -> Cgt;	1713 2064 556 557
NC_022539.1	44784	g	g	g	g	g	g	g	g	g	g	g	g	C	g	C	g	g	g	g	g	g	C	C	g	g	g	g	cds43;Name=YP_008636875.1;Parent=gene50;Dbxref=Genbank:YP_008636875.1,GeneID:17148902;gbkey=CDS;gene=xfutal1;product=probable avirulence avrBs3%2Fpth family protein%2C type III effector%2C TAL effector Xfutal1;protein_id=YP_008636875.1;transl_table=11 probable avirulence avrBs3%2Fpth family protein%2C type III effector%2C TAL effector Xfutal1 (40541-45205 +)	non-silent ggt -> gCt;	1713 2064 556 557
NC_022539.1	44786	g	g	g	g	g	g	g	g	g	g	g	g	A	g	A	g	g	g	g	g	g	A	A	g	g	g	g	cds43;Name=YP_008636875.1;Parent=gene50;Dbxref=Genbank:YP_008636875.1,GeneID:17148902;gbkey=CDS;gene=xfutal1;product=probable avirulence avrBs3%2Fpth family protein%2C type III effector%2C TAL effector Xfutal1;protein_id=YP_008636875.1;transl_table=11 probable avirulence avrBs3%2Fpth family protein%2C type III effector%2C TAL effector Xfutal1 (40541-45205 +)	non-silent gct -> Act;	1713 2064 556 557
NC_022539.1	44791	g	g	g	g	g	g	g	g	g	g	g	g	A	g	A	g	g	g	g	g	g	A	A	g	g	g	g	cds43;Name=YP_008636875.1;Parent=gene50;Dbxref=Genbank:YP_008636875.1,GeneID:17148902;gbkey=CDS;gene=xfutal1;product=probable avirulence avrBs3%2Fpth family protein%2C type III effector%2C TAL effector Xfutal1;protein_id=YP_008636875.1;transl_table=11 probable avirulence avrBs3%2Fpth family protein%2C type III effector%2C TAL effector Xfutal1 (40541-45205 +)	silent tcg -> tcA;	1713 2064 556 557
NC_022539.1	44806	c	c	c	c	c	c	c	c	c	c	c	c	T	c	T	c	c	c	c	c	c	T	T	c	c	c	c	cds43;Name=YP_008636875.1;Parent=gene50;Dbxref=Genbank:YP_008636875.1,GeneID:17148902;gbkey=CDS;gene=xfutal1;product=probable avirulence avrBs3%2Fpth family protein%2C type III effector%2C TAL effector Xfutal1;protein_id=YP_008636875.1;transl_table=11 probable avirulence avrBs3%2Fpth family protein%2C type III effector%2C TAL effector Xfutal1 (40541-45205 +)	silent gac -> gaT;	1713 2064 556 557
NC_022539.1	44815	t	t	t	t	t	t	t	t	t	t	t	t	t	t	t	t	t	t	G	t	t	t	t	t	t	t	t	cds43;Name=YP_008636875.1;Parent=gene50;Dbxref=Genbank:YP_008636875.1,GeneID:17148902;gbkey=CDS;gene=xfutal1;product=probable avirulence avrBs3%2Fpth family protein%2C type III effector%2C TAL effector Xfutal1;protein_id=YP_008636875.1;transl_table=11 probable avirulence avrBs3%2Fpth family protein%2C type III effector%2C TAL effector Xfutal1 (40541-45205 +)	silent tct -> tcG;	3035
NC_022539.1	44819	c	c	c	c	c	c	c	c	c	c	c	c	c	c	c	c	c	c	G	c	c	c	c	c	c	c	c	cds43;Name=YP_008636875.1;Parent=gene50;Dbxref=Genbank:YP_008636875.1,GeneID:17148902;gbkey=CDS;gene=xfutal1;product=probable avirulence avrBs3%2Fpth family protein%2C type III effector%2C TAL effector Xfutal1;protein_id=YP_008636875.1;transl_table=11 probable avirulence avrBs3%2Fpth family protein%2C type III effector%2C TAL effector Xfutal1 (40541-45205 +)	non-silent cat -> Gat;	3035
NC_022539.1	44834	g	g	g	g	g	g	g	g	g	g	g	g	T	g	T	g	g	g	g	g	g	T	T	g	g	g	g	cds43;Name=YP_008636875.1;Parent=gene50;Dbxref=Genbank:YP_008636875.1,GeneID:17148902;gbkey=CDS;gene=xfutal1;product=probable avirulence avrBs3%2Fpth family protein%2C type III effector%2C TAL effector Xfutal1;protein_id=YP_008636875.1;transl_table=11 probable avirulence avrBs3%2Fpth family protein%2C type III effector%2C TAL effector Xfutal1 (40541-45205 +)	non-silent gcg -> Tcg;	1713 2064 556 557
NC_022539.1	44851	g	g	g	g	g	g	g	g	g	g	g	g	T	g	T	g	g	g	g	g	g	T	T	g	g	g	g	cds43;Name=YP_008636875.1;Parent=gene50;Dbxref=Genbank:YP_008636875.1,GeneID:17148902;gbkey=CDS;gene=xfutal1;product=probable avirulence avrBs3%2Fpth family protein%2C type III effector%2C TAL effector Xfutal1;protein_id=YP_008636875.1;transl_table=11 probable avirulence avrBs3%2Fpth family protein%2C type III effector%2C TAL effector Xfutal1 (40541-45205 +)	silent ctg -> ctT;	1713 2064 556 557
NC_022539.1	44869	a	a	a	a	a	a	a	a	a	a	a	a	G	a	G	a	a	a	a	a	a	G	G	a	a	a	a	cds43;Name=YP_008636875.1;Parent=gene50;Dbxref=Genbank:YP_008636875.1,GeneID:17148902;gbkey=CDS;gene=xfutal1;product=probable avirulence avrBs3%2Fpth family protein%2C type III effector%2C TAL effector Xfutal1;protein_id=YP_008636875.1;transl_table=11 probable avirulence avrBs3%2Fpth family protein%2C type III effector%2C TAL effector Xfutal1 (40541-45205 +)	non-silent ata -> atG;	1713 2064 556 557
NC_022539.1	44870	g	g	g	g	g	g	g	g	g	g	g	g	C	g	C	g	g	g	g	g	g	C	C	g	g	g	g	cds43;Name=YP_008636875.1;Parent=gene50;Dbxref=Genbank:YP_008636875.1,GeneID:17148902;gbkey=CDS;gene=xfutal1;product=probable avirulence avrBs3%2Fpth family protein%2C type III effector%2C TAL effector Xfutal1;protein_id=YP_008636875.1;transl_table=11 probable avirulence avrBs3%2Fpth family protein%2C type III effector%2C TAL effector Xfutal1 (40541-45205 +)	non-silent gac -> Cac;	1713 2064 556 557
NC_022539.1	44873	c	c	c	c	c	c	c	c	c	c	c	c	G	c	G	c	c	c	c	c	c	G	G	c	c	c	c	cds43;Name=YP_008636875.1;Parent=gene50;Dbxref=Genbank:YP_008636875.1,GeneID:17148902;gbkey=CDS;gene=xfutal1;product=probable avirulence avrBs3%2Fpth family protein%2C type III effector%2C TAL effector Xfutal1;protein_id=YP_008636875.1;transl_table=11 probable avirulence avrBs3%2Fpth family protein%2C type III effector%2C TAL effector Xfutal1 (40541-45205 +)	non-silent cgg -> Ggg;	1713 2064 556 557
NC_022539.1	44874	g	g	g	g	g	g	g	g	g	g	g	g	A	g	A	g	g	g	g	g	g	A	A	g	g	g	g	cds43;Name=YP_008636875.1;Parent=gene50;Dbxref=Genbank:YP_008636875.1,GeneID:17148902;gbkey=CDS;gene=xfutal1;product=probable avirulence avrBs3%2Fpth family protein%2C type III effector%2C TAL effector Xfutal1;protein_id=YP_008636875.1;transl_table=11 probable avirulence avrBs3%2Fpth family protein%2C type III effector%2C TAL effector Xfutal1 (40541-45205 +)	non-silent cgg -> cAg;	1713 2064 556 557
NC_022539.1	44877	c	c	c	c	c	c	c	c	c	c	c	c	G	c	G	c	c	c	c	c	c	G	G	c	c	c	c	cds43;Name=YP_008636875.1;Parent=gene50;Dbxref=Genbank:YP_008636875.1,GeneID:17148902;gbkey=CDS;gene=xfutal1;product=probable avirulence avrBs3%2Fpth family protein%2C type III effector%2C TAL effector Xfutal1;protein_id=YP_008636875.1;transl_table=11 probable avirulence avrBs3%2Fpth family protein%2C type III effector%2C TAL effector Xfutal1 (40541-45205 +)	non-silent gcg -> gGg;	1713 2064 556 557
NC_022539.1	44878	g	g	g	g	g	g	g	g	g	g	g	g	A	g	A	g	g	g	g	g	g	A	A	g	g	g	g	cds43;Name=YP_008636875.1;Parent=gene50;Dbxref=Genbank:YP_008636875.1,GeneID:17148902;gbkey=CDS;gene=xfutal1;product=probable avirulence avrBs3%2Fpth family protein%2C type III effector%2C TAL effector Xfutal1;protein_id=YP_008636875.1;transl_table=11 probable avirulence avrBs3%2Fpth family protein%2C type III effector%2C TAL effector Xfutal1 (40541-45205 +)	silent gcg -> gcA;	1713 2064 556 557
NC_022539.1	44880	g	g	g	g	g	g	g	g	g	g	g	g	A	g	A	g	g	g	g	g	g	A	A	g	g	g	g	cds43;Name=YP_008636875.1;Parent=gene50;Dbxref=Genbank:YP_008636875.1,GeneID:17148902;gbkey=CDS;gene=xfutal1;product=probable avirulence avrBs3%2Fpth family protein%2C type III effector%2C TAL effector Xfutal1;protein_id=YP_008636875.1;transl_table=11 probable avirulence avrBs3%2Fpth family protein%2C type III effector%2C TAL effector Xfutal1 (40541-45205 +)	non-silent ggc -> gAc;	1713 2064 556 557
NC_022539.1	44881	c	c	c	c	c	c	c	c	c	c	c	c	T	c	T	c	c	c	c	c	c	T	T	c	c	c	c	cds43;Name=YP_008636875.1;Parent=gene50;Dbxref=Genbank:YP_008636875.1,GeneID:17148902;gbkey=CDS;gene=xfutal1;product=probable avirulence avrBs3%2Fpth family protein%2C type III effector%2C TAL effector Xfutal1;protein_id=YP_008636875.1;transl_table=11 probable avirulence avrBs3%2Fpth family protein%2C type III effector%2C TAL effector Xfutal1 (40541-45205 +)	silent ggc -> ggT;	1713 2064 556 557
NC_022539.1	44885	g	g	g	g	g	g	g	g	g	g	g	g	A	g	A	g	g	g	g	g	g	A	A	g	g	g	g	cds43;Name=YP_008636875.1;Parent=gene50;Dbxref=Genbank:YP_008636875.1,GeneID:17148902;gbkey=CDS;gene=xfutal1;product=probable avirulence avrBs3%2Fpth family protein%2C type III effector%2C TAL effector Xfutal1;protein_id=YP_008636875.1;transl_table=11 probable avirulence avrBs3%2Fpth family protein%2C type III effector%2C TAL effector Xfutal1 (40541-45205 +)	non-silent gcg -> Acg;	1713 2064 556 557
NC_022539.1	44889	t	t	t	t	t	t	t	t	t	t	t	t	G	t	G	t	t	t	t	t	t	G	G	t	t	t	t	cds43;Name=YP_008636875.1;Parent=gene50;Dbxref=Genbank:YP_008636875.1,GeneID:17148902;gbkey=CDS;gene=xfutal1;product=probable avirulence avrBs3%2Fpth family protein%2C type III effector%2C TAL effector Xfutal1;protein_id=YP_008636875.1;transl_table=11 probable avirulence avrBs3%2Fpth family protein%2C type III effector%2C TAL effector Xfutal1 (40541-45205 +)	non-silent ctg -> cGg;	1713 2064 556 557
NC_022539.1	44924	a	a	a	a	a	a	a	a	a	a	a	a	C	a	C	a	a	a	a	a	a	C	C	a	a	a	a	cds43;Name=YP_008636875.1;Parent=gene50;Dbxref=Genbank:YP_008636875.1,GeneID:17148902;gbkey=CDS;gene=xfutal1;product=probable avirulence avrBs3%2Fpth family protein%2C type III effector%2C TAL effector Xfutal1;protein_id=YP_008636875.1;transl_table=11 probable avirulence avrBs3%2Fpth family protein%2C type III effector%2C TAL effector Xfutal1 (40541-45205 +)	non-silent agt -> Cgt;	1713 2064 556 557
NC_022539.1	44927	t	t	t	t	t	t	t	t	t	t	t	t	G	t	G	t	t	t	t	t	t	G	G	t	t	t	t	cds43;Name=YP_008636875.1;Parent=gene50;Dbxref=Genbank:YP_008636875.1,GeneID:17148902;gbkey=CDS;gene=xfutal1;product=probable avirulence avrBs3%2Fpth family protein%2C type III effector%2C TAL effector Xfutal1;protein_id=YP_008636875.1;transl_table=11 probable avirulence avrBs3%2Fpth family protein%2C type III effector%2C TAL effector Xfutal1 (40541-45205 +)	non-silent tct -> Gct;	1713 2064 556 557
NC_022539.1	44943	t	t	t	t	t	t	t	t	t	t	t	t	C	t	C	t	t	t	t	t	t	C	C	t	t	t	t	cds43;Name=YP_008636875.1;Parent=gene50;Dbxref=Genbank:YP_008636875.1,GeneID:17148902;gbkey=CDS;gene=xfutal1;product=probable avirulence avrBs3%2Fpth family protein%2C type III effector%2C TAL effector Xfutal1;protein_id=YP_008636875.1;transl_table=11 probable avirulence avrBs3%2Fpth family protein%2C type III effector%2C TAL effector Xfutal1 (40541-45205 +)	non-silent ttc -> tCc;	1713 2064 556 557
NC_022539.1	44982	a	a	a	a	a	a	a	a	a	a	a	a	G	a	G	a	a	a	a	a	a	G	G	a	a	a	a	cds43;Name=YP_008636875.1;Parent=gene50;Dbxref=Genbank:YP_008636875.1,GeneID:17148902;gbkey=CDS;gene=xfutal1;product=probable avirulence avrBs3%2Fpth family protein%2C type III effector%2C TAL effector Xfutal1;protein_id=YP_008636875.1;transl_table=11 probable avirulence avrBs3%2Fpth family protein%2C type III effector%2C TAL effector Xfutal1 (40541-45205 +)	non-silent cac -> cGc;	1713 2064 556 557
NC_022539.1	44986	g	g	g	g	g	g	g	g	g	g	g	g	T	g	T	g	g	g	g	g	g	T	T	g	g	g	g	cds43;Name=YP_008636875.1;Parent=gene50;Dbxref=Genbank:YP_008636875.1,GeneID:17148902;gbkey=CDS;gene=xfutal1;product=probable avirulence avrBs3%2Fpth family protein%2C type III effector%2C TAL effector Xfutal1;protein_id=YP_008636875.1;transl_table=11 probable avirulence avrBs3%2Fpth family protein%2C type III effector%2C TAL effector Xfutal1 (40541-45205 +)	non-silent gag -> gaT;	1713 2064 556 557
NC_022539.1	44988	g	g	g	g	g	g	g	g	g	g	g	g	C	g	C	g	g	g	g	g	g	C	C	g	g	g	g	cds43;Name=YP_008636875.1;Parent=gene50;Dbxref=Genbank:YP_008636875.1,GeneID:17148902;gbkey=CDS;gene=xfutal1;product=probable avirulence avrBs3%2Fpth family protein%2C type III effector%2C TAL effector Xfutal1;protein_id=YP_008636875.1;transl_table=11 probable avirulence avrBs3%2Fpth family protein%2C type III effector%2C TAL effector Xfutal1 (40541-45205 +)	non-silent ggg -> gCg;	1713 2064 556 557
NC_022539.1	45007	c	c	c	A	c	c	A	c	c	A	c	A	c	A	c	A	c	A	A	c	c	c	c	c	c	c	A	cds43;Name=YP_008636875.1;Parent=gene50;Dbxref=Genbank:YP_008636875.1,GeneID:17148902;gbkey=CDS;gene=xfutal1;product=probable avirulence avrBs3%2Fpth family protein%2C type III effector%2C TAL effector Xfutal1;protein_id=YP_008636875.1;transl_table=11 probable avirulence avrBs3%2Fpth family protein%2C type III effector%2C TAL effector Xfutal1 (40541-45205 +)	silent ctc -> ctA;	1138 1420 1646 1680 1811 220 301 3035 XCP123
NC_022539.1	45014	g	g	g	g	g	g	g	g	g	g	g	g	A	g	A	g	g	g	g	g	g	A	A	g	g	g	g	cds43;Name=YP_008636875.1;Parent=gene50;Dbxref=Genbank:YP_008636875.1,GeneID:17148902;gbkey=CDS;gene=xfutal1;product=probable avirulence avrBs3%2Fpth family protein%2C type III effector%2C TAL effector Xfutal1;protein_id=YP_008636875.1;transl_table=11 probable avirulence avrBs3%2Fpth family protein%2C type III effector%2C TAL effector Xfutal1 (40541-45205 +)	non-silent ggt -> Agt;	1713 2064 556 557
NC_022539.1	45046	a	a	a	a	a	a	a	a	a	a	a	a	C	a	C	a	a	a	a	a	a	C	C	a	a	a	a	cds43;Name=YP_008636875.1;Parent=gene50;Dbxref=Genbank:YP_008636875.1,GeneID:17148902;gbkey=CDS;gene=xfutal1;product=probable avirulence avrBs3%2Fpth family protein%2C type III effector%2C TAL effector Xfutal1;protein_id=YP_008636875.1;transl_table=11 probable avirulence avrBs3%2Fpth family protein%2C type III effector%2C TAL effector Xfutal1 (40541-45205 +)	silent gga -> ggC;	1713 2064 556 557
NC_022539.1	45101	a	a	a	a	a	a	a	a	a	a	a	a	G	a	G	a	a	a	a	a	a	G	G	a	a	a	a	cds43;Name=YP_008636875.1;Parent=gene50;Dbxref=Genbank:YP_008636875.1,GeneID:17148902;gbkey=CDS;gene=xfutal1;product=probable avirulence avrBs3%2Fpth family protein%2C type III effector%2C TAL effector Xfutal1;protein_id=YP_008636875.1;transl_table=11 probable avirulence avrBs3%2Fpth family protein%2C type III effector%2C TAL effector Xfutal1 (40541-45205 +)	non-silent atg -> Gtg;	1713 2064 556 557
NC_022539.1	45132	t	t	t	t	t	t	t	t	t	t	t	t	C	t	C	t	t	t	t	t	t	C	C	t	t	t	t	cds43;Name=YP_008636875.1;Parent=gene50;Dbxref=Genbank:YP_008636875.1,GeneID:17148902;gbkey=CDS;gene=xfutal1;product=probable avirulence avrBs3%2Fpth family protein%2C type III effector%2C TAL effector Xfutal1;protein_id=YP_008636875.1;transl_table=11 probable avirulence avrBs3%2Fpth family protein%2C type III effector%2C TAL effector Xfutal1 (40541-45205 +)	non-silent gta -> gCa;	1713 2064 556 557
NC_022539.1	45138	a	a	a	a	a	a	a	a	a	a	a	a	C	a	C	a	a	a	a	a	a	C	C	a	a	a	a	cds43;Name=YP_008636875.1;Parent=gene50;Dbxref=Genbank:YP_008636875.1,GeneID:17148902;gbkey=CDS;gene=xfutal1;product=probable avirulence avrBs3%2Fpth family protein%2C type III effector%2C TAL effector Xfutal1;protein_id=YP_008636875.1;transl_table=11 probable avirulence avrBs3%2Fpth family protein%2C type III effector%2C TAL effector Xfutal1 (40541-45205 +)	non-silent gag -> gCg;	1713 2064 556 557
NC_022539.1	45139	g	g	g	g	g	g	g	g	g	g	g	g	A	g	A	g	g	g	g	g	g	A	A	g	g	g	g	cds43;Name=YP_008636875.1;Parent=gene50;Dbxref=Genbank:YP_008636875.1,GeneID:17148902;gbkey=CDS;gene=xfutal1;product=probable avirulence avrBs3%2Fpth family protein%2C type III effector%2C TAL effector Xfutal1;protein_id=YP_008636875.1;transl_table=11 probable avirulence avrBs3%2Fpth family protein%2C type III effector%2C TAL effector Xfutal1 (40541-45205 +)	silent gag -> gaA;	1713 2064 556 557
NC_022539.1	45141	a	a	a	C	a	a	C	a	a	C	a	C	C	C	C	C	a	C	C	a	a	C	C	a	a	a	C	cds43;Name=YP_008636875.1;Parent=gene50;Dbxref=Genbank:YP_008636875.1,GeneID:17148902;gbkey=CDS;gene=xfutal1;product=probable avirulence avrBs3%2Fpth family protein%2C type III effector%2C TAL effector Xfutal1;protein_id=YP_008636875.1;transl_table=11 probable avirulence avrBs3%2Fpth family protein%2C type III effector%2C TAL effector Xfutal1 (40541-45205 +)	non-silent gag -> gCg;	1138 1420 1646 1680 1713 1811 2064 220 301 3035 556 557 XCP123
NC_022539.1	45193	g	g	g	g	g	g	g	g	g	g	g	g	A	g	A	g	g	g	g	g	g	A	A	g	g	g	g	cds43;Name=YP_008636875.1;Parent=gene50;Dbxref=Genbank:YP_008636875.1,GeneID:17148902;gbkey=CDS;gene=xfutal1;product=probable avirulence avrBs3%2Fpth family protein%2C type III effector%2C TAL effector Xfutal1;protein_id=YP_008636875.1;transl_table=11 probable avirulence avrBs3%2Fpth family protein%2C type III effector%2C TAL effector Xfutal1 (40541-45205 +)	silent ctg -> ctA;	1713 2064 556 557
NC_022539.1	45196	t	t	t	t	t	t	t	t	t	t	t	t	G	t	G	t	t	t	t	t	t	G	G	t	t	t	t	cds43;Name=YP_008636875.1;Parent=gene50;Dbxref=Genbank:YP_008636875.1,GeneID:17148902;gbkey=CDS;gene=xfutal1;product=probable avirulence avrBs3%2Fpth family protein%2C type III effector%2C TAL effector Xfutal1;protein_id=YP_008636875.1;transl_table=11 probable avirulence avrBs3%2Fpth family protein%2C type III effector%2C TAL effector Xfutal1 (40541-45205 +)	non-silent ttt -> ttG;	1713 2064 556 557
NC_022539.1	45209	c	c	c	c	c	c	c	c	c	c	c	c	T	c	T	c	c	c	c	c	c	T	T	c	c	c	c			1713 2064 556 557
NC_022539.1	8887	t	t	t	C	t	t	C	t	t	C	t	C	t	C	t	C	t	C	C	t	t	t	t	t	t	t	C			1138 1420 1646 1680 1811 220 301 3035 XCP123
NC_022539.1	8923	c	c	c	A	c	c	A	c	c	A	c	A	A	A	A	A	c	A	A	c	c	A	A	c	c	c	A			1138 1420 1646 1680 1713 1811 2064 220 301 3035 556 557 XCP123
NC_022539.1	8924	g	g	g	A	g	g	A	g	g	A	g	A	A	A	A	A	g	A	A	g	g	A	A	g	g	g	A			1138 1420 1646 1680 1713 1811 2064 220 301 3035 556 557 XCP123
NC_022539.1	8925	c	c	c	A	c	c	A	c	c	A	c	A	A	A	A	A	c	A	A	c	c	A	A	c	c	c	A			1138 1420 1646 1680 1713 1811 2064 220 301 3035 556 557 XCP123
NC_022539.1	8929	c	c	c	T	c	c	T	c	c	T	c	T	T	T	T	T	c	T	T	c	c	T	T	c	c	c	T			1138 1420 1646 1680 1713 1811 2064 220 301 3035 556 557 XCP123
NC_022539.1	8931	c	c	c	T	c	c	T	c	c	T	c	T	c	T	c	T	c	T	T	c	c	c	c	c	c	c	T			1138 1420 1646 1680 1811 220 301 3035 XCP123
NC_022539.1	8937	g	g	g	A	g	g	A	g	g	A	g	A	A	A	A	A	g	A	A	g	g	A	A	g	g	g	A			1138 1420 1646 1680 1713 1811 2064 220 301 3035 556 557 XCP123
NC_022539.1	8945	t	t	t	t	t	t	t	t	t	t	t	t	C	t	C	t	t	t	t	t	t	C	C	t	t	t	t			1713 2064 556 557
NC_022539.1	8947	t	t	t	C	t	t	C	t	t	C	t	C	t	C	t	C	t	C	C	t	t	t	t	t	t	t	C			1138 1420 1646 1680 1811 220 301 3035 XCP123
NC_022539.1	8951	g	g	g	C	g	g	C	g	g	C	g	C	g	C	g	C	g	C	C	g	g	g	g	g	g	g	C			1138 1420 1646 1680 1811 220 301 3035 XCP123
NC_022539.1	8953	c	c	c	T	c	c	T	c	c	T	c	T	c	T	c	T	c	T	T	c	c	c	c	c	c	c	T			1138 1420 1646 1680 1811 220 301 3035 XCP123
NC_022539.1	8967	a	a	a	G	a	a	G	a	a	G	a	G	a	G	a	G	a	G	G	a	a	a	a	a	a	a	G			1138 1420 1646 1680 1811 220 301 3035 XCP123
NC_022539.1	8969	g	g	g	C	g	g	C	g	g	C	g	C	g	C	g	C	g	C	C	g	g	g	g	g	g	g	C			1138 1420 1646 1680 1811 220 301 3035 XCP123
NC_022539.1	8971	c	c	c	T	c	c	T	c	c	T	c	T	T	T	T	T	c	T	T	c	c	T	T	c	c	c	T			1138 1420 1646 1680 1713 1811 2064 220 301 3035 556 557 XCP123
NC_022539.1	8975	a	a	a	a	a	a	a	a	a	a	a	a	G	a	G	a	a	a	a	a	a	G	G	a	a	a	a			1713 2064 556 557
NC_022539.1	8975	a	a	a	T	a	a	T	a	a	T	a	T	a	T	a	T	a	T	T	a	a	a	a	a	a	a	T			1138 1420 1646 1680 1811 220 301 3035 XCP123
NC_022539.1	9000	g	g	g	T	g	g	T	g	g	T	g	T	g	T	g	T	g	T	T	g	g	g	g	g	g	g	T			1138 1420 1646 1680 1811 220 301 3035 XCP123
NC_022539.1	9025	g	g	g	C	g	g	C	g	g	C	g	C	C	C	C	C	g	C	C	g	g	C	C	g	g	g	C			1138 1420 1646 1680 1713 1811 2064 220 301 3035 556 557 XCP123
NC_022539.1	9038	a	a	a	C	a	a	C	a	a	C	a	C	a	C	a	C	a	C	C	a	a	a	a	a	a	a	C			1138 1420 1646 1680 1811 220 301 3035 XCP123
NC_022539.1	9105	c	c	c	A	c	c	A	c	c	A	c	A	c	A	c	A	c	A	A	c	c	c	c	c	c	c	A			1138 1420 1646 1680 1811 220 301 3035 XCP123
NC_022539.1	9127	g	g	g	T	g	g	T	g	g	T	g	T	g	T	g	T	g	T	T	g	g	g	g	g	g	g	T			1138 1420 1646 1680 1811 220 301 3035 XCP123
NC_022541.1	100014	c	c	c	G	c	c	G	c	c	G	c	G	G	G	G	G	c	G	G	c	c	G	G	c	c	c	G	cds80;Name=YP_008636975.1;Parent=gene83;Dbxref=Genbank:YP_008636975.1,GeneID:17149001;gbkey=CDS;gene=kduD;product=probable 2-deoxy-D-gluconate 3-dehydrogenase;protein_id=YP_008636975.1;transl_table=11 probable 2-deoxy-D-gluconate 3-dehydrogenase (99315-100070 -)	silent acg -> acC;	1138 1420 1646 1680 1713 1811 2064 220 301 3035 556 557 XCP123
NC_022541.1	10006	t	t	t	G	t	t	G	t	t	G	t	G	t	G	t	G	t	G	G	t	t	t	t	t	t	t	G	cds6;Name=YP_008636901.1;Parent=gene6;Dbxref=Genbank:YP_008636901.1,GeneID:17148936;gbkey=CDS;product=hypothetical protein;protein_id=YP_008636901.1;transl_table=11 hypothetical protein (9578-10771 +)	non-silent cat -> caG;	1138 1420 1646 1680 1811 220 301 3035 XCP123
NC_022541.1	100091	a	a	a	G	a	a	G	a	a	G	a	G	a	G	a	G	a	G	G	a	a	a	a	a	a	a	G			1138 1420 1646 1680 1811 220 301 3035 XCP123
NC_022541.1	100097	c	c	c	G	c	c	G	c	c	G	c	G	c	G	c	G	c	G	G	c	c	c	c	c	c	c	G			1138 1420 1646 1680 1811 220 301 3035 XCP123
NC_022541.1	100114	a	a	a	G	a	a	G	a	a	G	a	G	a	G	a	G	a	G	G	a	a	a	a	a	a	a	G			1138 1420 1646 1680 1811 220 301 3035 XCP123
NC_022541.1	100120	t	t	t	C	t	t	C	t	t	C	t	C	t	C	t	C	t	C	C	t	t	t	t	t	t	t	C			1138 1420 1646 1680 1811 220 301 3035 XCP123
NC_022541.1	100123	t	t	t	C	t	t	C	t	t	C	t	C	t	C	t	C	t	C	C	t	t	t	t	t	t	t	C			1138 1420 1646 1680 1811 220 301 3035 XCP123
NC_022541.1	100135	g	g	g	T	g	g	T	g	g	T	g	T	g	T	g	T	g	T	T	g	g	g	g	g	g	g	T			1138 1420 1646 1680 1811 220 301 3035 XCP123
NC_022541.1	100136	a	a	a	G	a	a	G	a	a	G	a	G	a	G	a	G	a	G	G	a	a	a	a	a	a	a	G			1138 1420 1646 1680 1811 220 301 3035 XCP123
NC_022541.1	100141	a	a	a	T	a	a	T	a	a	T	a	T	a	T	a	T	a	T	T	a	a	a	a	a	a	a	T			1138 1420 1646 1680 1811 220 301 3035 XCP123
NC_022541.1	100144	c	c	c	T	c	c	T	c	c	T	c	T	c	T	c	T	c	T	T	c	c	c	c	c	c	c	T			1138 1420 1646 1680 1811 220 301 3035 XCP123
NC_022541.1	100147	a	a	a	G	a	a	G	a	a	G	a	G	a	G	a	G	a	G	G	a	a	a	a	a	a	a	G			1138 1420 1646 1680 1811 220 301 3035 XCP123
NC_022541.1	100167	c	c	c	c	c	c	c	c	c	c	c	c	G	c	G	c	c	c	c	c	c	G	G	c	c	c	c			1713 2064 556 557
NC_022541.1	100174	a	a	a	C	a	a	C	a	a	C	a	C	a	C	a	C	a	C	C	a	a	a	a	a	a	a	C			1138 1420 1646 1680 1811 220 301 3035 XCP123
NC_022541.1	100188	g	g	g	T	g	g	T	g	g	T	g	T	g	T	g	T	g	T	T	g	g	g	g	g	g	g	T			1138 1420 1646 1680 1811 220 301 3035 XCP123
NC_022541.1	100189	a	a	a	G	a	a	G	a	a	G	a	G	a	G	a	G	a	G	G	a	a	a	a	a	a	a	G			1138 1420 1646 1680 1811 220 301 3035 XCP123
NC_022541.1	100195	a	a	a	C	a	a	C	a	a	C	a	C	a	C	a	C	a	C	C	a	a	a	a	a	a	a	C			1138 1420 1646 1680 1811 220 301 3035 XCP123
NC_022541.1	100208	a	a	a	C	a	a	C	a	a	C	a	C	a	C	a	C	a	C	C	a	a	a	a	a	a	a	C			1138 1420 1646 1680 1811 220 301 3035 XCP123
NC_022541.1	100214	c	c	c	T	c	c	T	c	c	T	c	T	c	T	c	T	c	T	T	c	c	c	c	c	c	c	T			1138 1420 1646 1680 1811 220 301 3035 XCP123
NC_022541.1	100231	c	c	c	T	c	c	T	c	c	T	c	T	c	T	c	T	c	T	T	c	c	c	c	c	c	c	T			1138 1420 1646 1680 1811 220 301 3035 XCP123
NC_022541.1	100236	g	g	g	A	g	g	A	g	g	A	g	A	g	A	g	A	g	A	A	g	g	g	g	g	g	g	A			1138 1420 1646 1680 1811 220 301 3035 XCP123
NC_022541.1	100246	g	g	g	A	g	g	A	g	g	A	g	A	g	A	g	A	g	A	A	g	g	g	g	g	g	g	A			1138 1420 1646 1680 1811 220 301 3035 XCP123
NC_022541.1	100251	t	t	t	t	t	t	t	t	t	t	t	t	C	t	C	t	t	t	t	t	t	C	C	t	t	t	t			1713 2064 556 557
NC_022541.1	100286	a	a	a	G	a	a	G	a	a	G	a	G	a	G	a	G	a	G	G	a	a	a	a	a	a	a	G	cds81;Name=YP_008636976.1;Parent=gene84;Dbxref=Genbank:YP_008636976.1,GeneID:17152343;gbkey=CDS;gene=kduI;product=5-keto 4-deoxyuronate isomerase%2C probable;protein_id=YP_008636976.1;transl_table=11 5-keto 4-deoxyuronate isomerase%2C probable (100259-101113 -)	silent cat -> caC;	1138 1420 1646 1680 1811 220 301 3035 XCP123
NC_022541.1	100344	g	g	g	C	g	g	C	g	g	C	g	C	g	C	g	C	g	C	C	g	g	g	g	g	g	g	C	cds81;Name=YP_008636976.1;Parent=gene84;Dbxref=Genbank:YP_008636976.1,GeneID:17152343;gbkey=CDS;gene=kduI;product=5-keto 4-deoxyuronate isomerase%2C probable;protein_id=YP_008636976.1;transl_table=11 5-keto 4-deoxyuronate isomerase%2C probable (100259-101113 -)	non-silent tcc -> tGc;	1138 1420 1646 1680 1811 220 301 3035 XCP123
NC_022541.1	100345	a	a	a	T	a	a	T	a	a	T	a	T	a	T	a	T	a	T	T	a	a	a	a	a	a	a	T	cds81;Name=YP_008636976.1;Parent=gene84;Dbxref=Genbank:YP_008636976.1,GeneID:17152343;gbkey=CDS;gene=kduI;product=5-keto 4-deoxyuronate isomerase%2C probable;protein_id=YP_008636976.1;transl_table=11 5-keto 4-deoxyuronate isomerase%2C probable (100259-101113 -)	non-silent tcc -> Acc;	1138 1420 1646 1680 1811 220 301 3035 XCP123
NC_022541.1	100403	a	a	a	C	a	a	C	a	a	C	a	C	a	C	a	C	a	C	C	a	a	a	a	a	a	a	C	cds81;Name=YP_008636976.1;Parent=gene84;Dbxref=Genbank:YP_008636976.1,GeneID:17152343;gbkey=CDS;gene=kduI;product=5-keto 4-deoxyuronate isomerase%2C probable;protein_id=YP_008636976.1;transl_table=11 5-keto 4-deoxyuronate isomerase%2C probable (100259-101113 -)	non-silent att -> atG;	1138 1420 1646 1680 1811 220 301 3035 XCP123
NC_022541.1	100459	t	t	t	t	t	t	t	t	t	t	t	t	C	t	C	t	t	t	t	t	t	C	C	t	t	t	t	cds81;Name=YP_008636976.1;Parent=gene84;Dbxref=Genbank:YP_008636976.1,GeneID:17152343;gbkey=CDS;gene=kduI;product=5-keto 4-deoxyuronate isomerase%2C probable;protein_id=YP_008636976.1;transl_table=11 5-keto 4-deoxyuronate isomerase%2C probable (100259-101113 -)	non-silent aac -> Gac;	1713 2064 556 557
NC_022541.1	100530	a	a	a	a	a	a	a	a	a	G	a	G	a	a	a	a	a	G	a	a	a	a	a	a	a	a	a	cds81;Name=YP_008636976.1;Parent=gene84;Dbxref=Genbank:YP_008636976.1,GeneID:17152343;gbkey=CDS;gene=kduI;product=5-keto 4-deoxyuronate isomerase%2C probable;protein_id=YP_008636976.1;transl_table=11 5-keto 4-deoxyuronate isomerase%2C probable (100259-101113 -)	non-silent gtc -> gCc;	1646 1680 301
NC_022541.1	100532	a	a	a	G	a	a	G	a	a	G	a	G	a	G	a	G	a	G	G	a	a	a	a	a	a	a	G	cds81;Name=YP_008636976.1;Parent=gene84;Dbxref=Genbank:YP_008636976.1,GeneID:17152343;gbkey=CDS;gene=kduI;product=5-keto 4-deoxyuronate isomerase%2C probable;protein_id=YP_008636976.1;transl_table=11 5-keto 4-deoxyuronate isomerase%2C probable (100259-101113 -)	silent agt -> agC;	1138 1420 1646 1680 1811 220 301 3035 XCP123
NC_022541.1	100535	a	a	a	G	a	a	G	a	a	G	a	G	G	G	G	G	a	G	G	a	a	G	G	a	a	a	G	cds81;Name=YP_008636976.1;Parent=gene84;Dbxref=Genbank:YP_008636976.1,GeneID:17152343;gbkey=CDS;gene=kduI;product=5-keto 4-deoxyuronate isomerase%2C probable;protein_id=YP_008636976.1;transl_table=11 5-keto 4-deoxyuronate isomerase%2C probable (100259-101113 -)	silent ggt -> ggC;	1138 1420 1646 1680 1713 1811 2064 220 301 3035 556 557 XCP123
NC_022541.1	100538	g	g	g	g	g	g	g	g	g	g	g	g	A	g	A	g	g	g	g	g	g	A	A	g	g	g	g	cds81;Name=YP_008636976.1;Parent=gene84;Dbxref=Genbank:YP_008636976.1,GeneID:17152343;gbkey=CDS;gene=kduI;product=5-keto 4-deoxyuronate isomerase%2C probable;protein_id=YP_008636976.1;transl_table=11 5-keto 4-deoxyuronate isomerase%2C probable (100259-101113 -)	silent ccc -> ccT;	1713 2064 556 557
NC_022541.1	1005591	c	c	c	G	c	c	G	c	c	G	c	G	c	G	c	G	c	G	G	c	c	c	c	c	c	c	G	cds808;Name=YP_008637703.1;Parent=gene864;Dbxref=Genbank:YP_008637703.1,GeneID:17152102;gbkey=CDS;gene=apaH;product=probable diadenosine tetraphosphatase;protein_id=YP_008637703.1;transl_table=11 probable diadenosine tetraphosphatase (1005438-1006382 -)	silent cgg -> cgC;	1138 1420 1646 1680 1811 220 301 3035 XCP123
NC_022541.1	1005600	g	g	g	A	g	g	A	g	g	A	g	A	g	A	g	A	g	A	A	g	g	g	g	g	g	g	A	cds808;Name=YP_008637703.1;Parent=gene864;Dbxref=Genbank:YP_008637703.1,GeneID:17152102;gbkey=CDS;gene=apaH;product=probable diadenosine tetraphosphatase;protein_id=YP_008637703.1;transl_table=11 probable diadenosine tetraphosphatase (1005438-1006382 -)	silent gac -> gaT;	1138 1420 1646 1680 1811 220 301 3035 XCP123
NC_022541.1	1005604	g	g	g	C	g	g	C	g	g	C	g	C	g	C	g	C	g	C	C	g	g	g	g	g	g	g	C	cds808;Name=YP_008637703.1;Parent=gene864;Dbxref=Genbank:YP_008637703.1,GeneID:17152102;gbkey=CDS;gene=apaH;product=probable diadenosine tetraphosphatase;protein_id=YP_008637703.1;transl_table=11 probable diadenosine tetraphosphatase (1005438-1006382 -)	non-silent acc -> aGc;	1138 1420 1646 1680 1811 220 301 3035 XCP123
NC_022541.1	1005621	g	g	g	C	g	g	C	g	g	C	g	C	g	C	g	C	g	C	C	g	g	g	g	g	g	g	C	cds808;Name=YP_008637703.1;Parent=gene864;Dbxref=Genbank:YP_008637703.1,GeneID:17152102;gbkey=CDS;gene=apaH;product=probable diadenosine tetraphosphatase;protein_id=YP_008637703.1;transl_table=11 probable diadenosine tetraphosphatase (1005438-1006382 -)	silent acc -> acG;	1138 1420 1646 1680 1811 220 301 3035 XCP123
NC_022541.1	100565	c	c	c	T	c	c	T	c	c	T	c	T	c	T	c	T	c	T	T	c	c	c	c	c	c	c	T	cds81;Name=YP_008636976.1;Parent=gene84;Dbxref=Genbank:YP_008636976.1,GeneID:17152343;gbkey=CDS;gene=kduI;product=5-keto 4-deoxyuronate isomerase%2C probable;protein_id=YP_008636976.1;transl_table=11 5-keto 4-deoxyuronate isomerase%2C probable (100259-101113 -)	silent ctg -> ctA;	1138 1420 1646 1680 1811 220 301 3035 XCP123
NC_022541.1	1005678	g	g	g	C	g	g	C	g	g	C	g	C	C	C	C	C	g	C	C	g	g	C	C	g	g	g	C	cds808;Name=YP_008637703.1;Parent=gene864;Dbxref=Genbank:YP_008637703.1,GeneID:17152102;gbkey=CDS;gene=apaH;product=probable diadenosine tetraphosphatase;protein_id=YP_008637703.1;transl_table=11 probable diadenosine tetraphosphatase (1005438-1006382 -)	silent acc -> acG;	1138 1420 1646 1680 1713 1811 2064 220 301 3035 556 557 XCP123
NC_022541.1	1005684	g	g	g	A	g	g	A	g	g	A	g	A	g	A	g	A	g	A	A	g	g	g	g	g	g	g	A	cds808;Name=YP_008637703.1;Parent=gene864;Dbxref=Genbank:YP_008637703.1,GeneID:17152102;gbkey=CDS;gene=apaH;product=probable diadenosine tetraphosphatase;protein_id=YP_008637703.1;transl_table=11 probable diadenosine tetraphosphatase (1005438-1006382 -)	silent ggc -> ggT;	1138 1420 1646 1680 1811 220 301 3035 XCP123
NC_022541.1	1005708	g	g	g	A	g	g	A	g	g	A	g	A	g	A	g	A	g	A	A	g	g	g	g	g	g	g	A	cds808;Name=YP_008637703.1;Parent=gene864;Dbxref=Genbank:YP_008637703.1,GeneID:17152102;gbkey=CDS;gene=apaH;product=probable diadenosine tetraphosphatase;protein_id=YP_008637703.1;transl_table=11 probable diadenosine tetraphosphatase (1005438-1006382 -)	silent gtc -> gtT;	1138 1420 1646 1680 1811 220 301 3035 XCP123
NC_022541.1	1005735	t	t	t	A	t	t	A	t	t	A	t	A	t	A	t	A	t	A	A	t	t	t	t	t	t	t	A	cds808;Name=YP_008637703.1;Parent=gene864;Dbxref=Genbank:YP_008637703.1,GeneID:17152102;gbkey=CDS;gene=apaH;product=probable diadenosine tetraphosphatase;protein_id=YP_008637703.1;transl_table=11 probable diadenosine tetraphosphatase (1005438-1006382 -)	silent gga -> ggT;	1138 1420 1646 1680 1811 220 301 3035 XCP123
NC_022541.1	1005738	c	c	c	c	c	c	c	c	c	c	c	c	G	c	G	c	c	c	c	c	c	G	G	c	c	c	c	cds808;Name=YP_008637703.1;Parent=gene864;Dbxref=Genbank:YP_008637703.1,GeneID:17152102;gbkey=CDS;gene=apaH;product=probable diadenosine tetraphosphatase;protein_id=YP_008637703.1;transl_table=11 probable diadenosine tetraphosphatase (1005438-1006382 -)	silent ccg -> ccC;	1713 2064 556 557
NC_022541.1	100574	c	c	c	G	c	c	G	c	c	G	c	G	c	G	c	G	c	G	G	c	c	c	c	c	c	c	G	cds81;Name=YP_008636976.1;Parent=gene84;Dbxref=Genbank:YP_008636976.1,GeneID:17152343;gbkey=CDS;gene=kduI;product=5-keto 4-deoxyuronate isomerase%2C probable;protein_id=YP_008636976.1;transl_table=11 5-keto 4-deoxyuronate isomerase%2C probable (100259-101113 -)	silent tcg -> tcC;	1138 1420 1646 1680 1811 220 301 3035 XCP123
NC_022541.1	1005741	c	c	c	T	c	c	T	c	c	T	c	T	c	T	c	T	c	T	T	c	c	c	c	c	c	c	T	cds808;Name=YP_008637703.1;Parent=gene864;Dbxref=Genbank:YP_008637703.1,GeneID:17152102;gbkey=CDS;gene=apaH;product=probable diadenosine tetraphosphatase;protein_id=YP_008637703.1;transl_table=11 probable diadenosine tetraphosphatase (1005438-1006382 -)	silent gtg -> gtA;	1138 1420 1646 1680 1811 220 301 3035 XCP123
NC_022541.1	1005753	t	t	t	G	t	t	G	t	t	G	t	G	t	G	t	G	t	G	G	t	t	t	t	t	t	t	G	cds808;Name=YP_008637703.1;Parent=gene864;Dbxref=Genbank:YP_008637703.1,GeneID:17152102;gbkey=CDS;gene=apaH;product=probable diadenosine tetraphosphatase;protein_id=YP_008637703.1;transl_table=11 probable diadenosine tetraphosphatase (1005438-1006382 -)	silent cca -> ccC;	1138 1420 1646 1680 1811 220 301 3035 XCP123
NC_022541.1	1005777	g	g	g	C	g	g	C	g	g	C	g	C	g	C	g	C	g	C	C	g	g	g	g	g	g	g	C	cds808;Name=YP_008637703.1;Parent=gene864;Dbxref=Genbank:YP_008637703.1,GeneID:17152102;gbkey=CDS;gene=apaH;product=probable diadenosine tetraphosphatase;protein_id=YP_008637703.1;transl_table=11 probable diadenosine tetraphosphatase (1005438-1006382 -)	silent ggc -> ggG;	1138 1420 1646 1680 1811 220 301 3035 XCP123
NC_022541.1	1005786	g	g	g	g	g	g	g	g	g	g	g	g	T	g	T	g	g	g	g	g	g	T	T	g	g	g	g	cds808;Name=YP_008637703.1;Parent=gene864;Dbxref=Genbank:YP_008637703.1,GeneID:17152102;gbkey=CDS;gene=apaH;product=probable diadenosine tetraphosphatase;protein_id=YP_008637703.1;transl_table=11 probable diadenosine tetraphosphatase (1005438-1006382 -)	silent ggc -> ggA;	1713 2064 556 557
NC_022541.1	1005804	a	a	a	G	a	a	G	a	a	G	a	G	G	G	G	G	a	G	G	a	a	G	G	a	a	a	G	cds808;Name=YP_008637703.1;Parent=gene864;Dbxref=Genbank:YP_008637703.1,GeneID:17152102;gbkey=CDS;gene=apaH;product=probable diadenosine tetraphosphatase;protein_id=YP_008637703.1;transl_table=11 probable diadenosine tetraphosphatase (1005438-1006382 -)	silent att -> atC;	1138 1420 1646 1680 1713 1811 2064 220 301 3035 556 557 XCP123
NC_022541.1	1005807	g	g	g	A	g	g	A	g	g	A	g	A	g	A	g	A	g	A	A	g	g	g	g	g	g	g	A	cds808;Name=YP_008637703.1;Parent=gene864;Dbxref=Genbank:YP_008637703.1,GeneID:17152102;gbkey=CDS;gene=apaH;product=probable diadenosine tetraphosphatase;protein_id=YP_008637703.1;transl_table=11 probable diadenosine tetraphosphatase (1005438-1006382 -)	silent cgc -> cgT;	1138 1420 1646 1680 1811 220 301 3035 XCP123
NC_022541.1	1005819	a	a	a	G	a	a	G	a	a	G	a	G	a	G	a	G	a	G	G	a	a	a	a	a	a	a	G	cds808;Name=YP_008637703.1;Parent=gene864;Dbxref=Genbank:YP_008637703.1,GeneID:17152102;gbkey=CDS;gene=apaH;product=probable diadenosine tetraphosphatase;protein_id=YP_008637703.1;transl_table=11 probable diadenosine tetraphosphatase (1005438-1006382 -)	silent act -> acC;	1138 1420 1646 1680 1811 220 301 3035 XCP123
NC_022541.1	1005864	g	g	g	g	g	g	g	g	g	g	g	g	A	g	A	g	g	g	g	g	g	A	A	g	g	g	g	cds808;Name=YP_008637703.1;Parent=gene864;Dbxref=Genbank:YP_008637703.1,GeneID:17152102;gbkey=CDS;gene=apaH;product=probable diadenosine tetraphosphatase;protein_id=YP_008637703.1;transl_table=11 probable diadenosine tetraphosphatase (1005438-1006382 -)	silent cgc -> cgT;	1713 2064 556 557
NC_022541.1	1005885	c	c	c	A	c	c	A	c	c	A	c	A	c	A	c	A	c	A	A	c	c	c	c	c	c	c	A	cds808;Name=YP_008637703.1;Parent=gene864;Dbxref=Genbank:YP_008637703.1,GeneID:17152102;gbkey=CDS;gene=apaH;product=probable diadenosine tetraphosphatase;protein_id=YP_008637703.1;transl_table=11 probable diadenosine tetraphosphatase (1005438-1006382 -)	silent ccg -> ccT;	1138 1420 1646 1680 1811 220 301 3035 XCP123
NC_022541.1	1005894	g	g	g	A	g	g	A	g	g	A	g	A	g	A	g	A	g	A	A	g	g	g	g	g	g	g	A	cds808;Name=YP_008637703.1;Parent=gene864;Dbxref=Genbank:YP_008637703.1,GeneID:17152102;gbkey=CDS;gene=apaH;product=probable diadenosine tetraphosphatase;protein_id=YP_008637703.1;transl_table=11 probable diadenosine tetraphosphatase (1005438-1006382 -)	silent ggc -> ggT;	1138 1420 1646 1680 1811 220 301 3035 XCP123
NC_022541.1	1005897	c	c	c	c	c	c	c	c	c	c	c	c	G	c	G	c	c	c	c	c	c	G	G	c	c	c	c	cds808;Name=YP_008637703.1;Parent=gene864;Dbxref=Genbank:YP_008637703.1,GeneID:17152102;gbkey=CDS;gene=apaH;product=probable diadenosine tetraphosphatase;protein_id=YP_008637703.1;transl_table=11 probable diadenosine tetraphosphatase (1005438-1006382 -)	silent ccg -> ccC;	1713 2064 556 557
NC_022541.1	1005972	a	a	a	G	a	a	G	a	a	G	a	G	a	G	a	G	a	G	G	a	a	a	a	a	a	a	G	cds808;Name=YP_008637703.1;Parent=gene864;Dbxref=Genbank:YP_008637703.1,GeneID:17152102;gbkey=CDS;gene=apaH;product=probable diadenosine tetraphosphatase;protein_id=YP_008637703.1;transl_table=11 probable diadenosine tetraphosphatase (1005438-1006382 -)	silent cat -> caC;	1138 1420 1646 1680 1811 220 301 3035 XCP123
NC_022541.1	1005975	c	c	c	T	c	c	T	c	c	T	c	T	c	T	c	T	c	T	T	c	c	c	c	c	c	c	T	cds808;Name=YP_008637703.1;Parent=gene864;Dbxref=Genbank:YP_008637703.1,GeneID:17152102;gbkey=CDS;gene=apaH;product=probable diadenosine tetraphosphatase;protein_id=YP_008637703.1;transl_table=11 probable diadenosine tetraphosphatase (1005438-1006382 -)	silent aag -> aaA;	1138 1420 1646 1680 1811 220 301 3035 XCP123
NC_022541.1	1006038	t	t	t	C	t	t	C	t	t	C	t	C	t	C	t	C	t	C	C	t	t	t	t	t	t	t	C	cds808;Name=YP_008637703.1;Parent=gene864;Dbxref=Genbank:YP_008637703.1,GeneID:17152102;gbkey=CDS;gene=apaH;product=probable diadenosine tetraphosphatase;protein_id=YP_008637703.1;transl_table=11 probable diadenosine tetraphosphatase (1005438-1006382 -)	silent gaa -> gaG;	1138 1420 1646 1680 1811 220 301 3035 XCP123
NC_022541.1	1006039	t	t	t	G	t	t	G	t	t	G	t	G	t	G	t	G	t	G	G	t	t	t	t	t	t	t	G	cds808;Name=YP_008637703.1;Parent=gene864;Dbxref=Genbank:YP_008637703.1,GeneID:17152102;gbkey=CDS;gene=apaH;product=probable diadenosine tetraphosphatase;protein_id=YP_008637703.1;transl_table=11 probable diadenosine tetraphosphatase (1005438-1006382 -)	non-silent gaa -> gCa;	1138 1420 1646 1680 1811 220 301 3035 XCP123
NC_022541.1	100607	a	a	a	G	a	a	G	a	a	G	a	G	a	G	a	G	a	G	G	a	a	a	a	a	a	a	G	cds81;Name=YP_008636976.1;Parent=gene84;Dbxref=Genbank:YP_008636976.1,GeneID:17152343;gbkey=CDS;gene=kduI;product=5-keto 4-deoxyuronate isomerase%2C probable;protein_id=YP_008636976.1;transl_table=11 5-keto 4-deoxyuronate isomerase%2C probable (100259-101113 -)	silent att -> atC;	1138 1420 1646 1680 1811 220 301 3035 XCP123
NC_022541.1	1006101	t	t	t	G	t	t	G	t	t	G	t	G	G	G	G	G	t	G	G	t	t	G	G	t	t	t	G	cds808;Name=YP_008637703.1;Parent=gene864;Dbxref=Genbank:YP_008637703.1,GeneID:17152102;gbkey=CDS;gene=apaH;product=probable diadenosine tetraphosphatase;protein_id=YP_008637703.1;transl_table=11 probable diadenosine tetraphosphatase (1005438-1006382 -)	silent gca -> gcC;	1138 1420 1646 1680 1713 1811 2064 220 301 3035 556 557 XCP123
NC_022541.1	1006122	g	g	g	A	g	g	A	g	g	A	g	A	A	A	A	A	g	A	A	g	g	A	A	g	g	g	A	cds808;Name=YP_008637703.1;Parent=gene864;Dbxref=Genbank:YP_008637703.1,GeneID:17152102;gbkey=CDS;gene=apaH;product=probable diadenosine tetraphosphatase;protein_id=YP_008637703.1;transl_table=11 probable diadenosine tetraphosphatase (1005438-1006382 -)	silent gac -> gaT;	1138 1420 1646 1680 1713 1811 2064 220 301 3035 556 557 XCP123
NC_022541.1	1006128	g	g	g	A	g	g	A	g	g	A	g	A	g	A	g	A	g	A	A	g	g	g	g	g	g	g	A	cds808;Name=YP_008637703.1;Parent=gene864;Dbxref=Genbank:YP_008637703.1,GeneID:17152102;gbkey=CDS;gene=apaH;product=probable diadenosine tetraphosphatase;protein_id=YP_008637703.1;transl_table=11 probable diadenosine tetraphosphatase (1005438-1006382 -)	silent aac -> aaT;	1138 1420 1646 1680 1811 220 301 3035 XCP123
NC_022541.1	1006155	g	g	g	A	g	g	A	g	g	A	g	A	g	A	g	A	g	A	A	g	g	g	g	g	g	g	A	cds808;Name=YP_008637703.1;Parent=gene864;Dbxref=Genbank:YP_008637703.1,GeneID:17152102;gbkey=CDS;gene=apaH;product=probable diadenosine tetraphosphatase;protein_id=YP_008637703.1;transl_table=11 probable diadenosine tetraphosphatase (1005438-1006382 -)	silent cgc -> cgT;	1138 1420 1646 1680 1811 220 301 3035 XCP123
NC_022541.1	1006161	g	g	g	A	g	g	A	g	g	A	g	A	g	A	g	A	g	A	A	g	g	g	g	g	g	g	A	cds808;Name=YP_008637703.1;Parent=gene864;Dbxref=Genbank:YP_008637703.1,GeneID:17152102;gbkey=CDS;gene=apaH;product=probable diadenosine tetraphosphatase;protein_id=YP_008637703.1;transl_table=11 probable diadenosine tetraphosphatase (1005438-1006382 -)	silent ggc -> ggT;	1138 1420 1646 1680 1811 220 301 3035 XCP123
NC_022541.1	1006175	g	g	g	A	g	g	A	g	g	A	g	A	g	A	g	A	g	A	A	g	g	g	g	g	g	g	A	cds808;Name=YP_008637703.1;Parent=gene864;Dbxref=Genbank:YP_008637703.1,GeneID:17152102;gbkey=CDS;gene=apaH;product=probable diadenosine tetraphosphatase;protein_id=YP_008637703.1;transl_table=11 probable diadenosine tetraphosphatase (1005438-1006382 -)	silent ctg -> Ttg;	1138 1420 1646 1680 1811 220 301 3035 XCP123
NC_022541.1	1006206	a	a	a	G	a	a	G	a	a	G	a	G	G	G	G	G	a	G	G	a	a	G	G	a	a	a	G	cds808;Name=YP_008637703.1;Parent=gene864;Dbxref=Genbank:YP_008637703.1,GeneID:17152102;gbkey=CDS;gene=apaH;product=probable diadenosine tetraphosphatase;protein_id=YP_008637703.1;transl_table=11 probable diadenosine tetraphosphatase (1005438-1006382 -)	silent agt -> agC;	1138 1420 1646 1680 1713 1811 2064 220 301 3035 556 557 XCP123
NC_022541.1	1006209	a	a	a	G	a	a	G	a	a	G	a	G	G	G	G	G	a	G	G	a	a	G	G	a	a	a	G	cds808;Name=YP_008637703.1;Parent=gene864;Dbxref=Genbank:YP_008637703.1,GeneID:17152102;gbkey=CDS;gene=apaH;product=probable diadenosine tetraphosphatase;protein_id=YP_008637703.1;transl_table=11 probable diadenosine tetraphosphatase (1005438-1006382 -)	silent cat -> caC;	1138 1420 1646 1680 1713 1811 2064 220 301 3035 556 557 XCP123
NC_022541.1	1006212	t	t	t	C	t	t	C	t	t	C	t	C	C	C	C	C	t	C	C	t	t	C	C	t	t	t	C	cds808;Name=YP_008637703.1;Parent=gene864;Dbxref=Genbank:YP_008637703.1,GeneID:17152102;gbkey=CDS;gene=apaH;product=probable diadenosine tetraphosphatase;protein_id=YP_008637703.1;transl_table=11 probable diadenosine tetraphosphatase (1005438-1006382 -)	silent gca -> gcG;	1138 1420 1646 1680 1713 1811 2064 220 301 3035 556 557 XCP123
NC_022541.1	1006221	c	c	c	c	c	c	c	c	c	c	c	c	G	c	G	c	c	c	c	c	c	G	G	c	c	c	c	cds808;Name=YP_008637703.1;Parent=gene864;Dbxref=Genbank:YP_008637703.1,GeneID:17152102;gbkey=CDS;gene=apaH;product=probable diadenosine tetraphosphatase;protein_id=YP_008637703.1;transl_table=11 probable diadenosine tetraphosphatase (1005438-1006382 -)	silent gcg -> gcC;	1713 2064 556 557
NC_022541.1	1006221	c	c	c	T	c	c	T	c	c	T	c	T	c	T	c	T	c	T	T	c	c	c	c	c	c	c	T	cds808;Name=YP_008637703.1;Parent=gene864;Dbxref=Genbank:YP_008637703.1,GeneID:17152102;gbkey=CDS;gene=apaH;product=probable diadenosine tetraphosphatase;protein_id=YP_008637703.1;transl_table=11 probable diadenosine tetraphosphatase (1005438-1006382 -)	silent gcg -> gcA;	1138 1420 1646 1680 1811 220 301 3035 XCP123
NC_022541.1	1006223	c	c	c	A	c	c	A	c	c	A	c	A	A	A	A	A	c	A	A	c	c	A	A	c	c	c	A	cds808;Name=YP_008637703.1;Parent=gene864;Dbxref=Genbank:YP_008637703.1,GeneID:17152102;gbkey=CDS;gene=apaH;product=probable diadenosine tetraphosphatase;protein_id=YP_008637703.1;transl_table=11 probable diadenosine tetraphosphatase (1005438-1006382 -)	non-silent gcg -> Tcg;	1138 1420 1646 1680 1713 1811 2064 220 301 3035 556 557 XCP123
NC_022541.1	1006233	g	g	g	A	g	g	A	g	g	A	g	A	g	A	g	A	g	A	A	g	g	g	g	g	g	g	A	cds808;Name=YP_008637703.1;Parent=gene864;Dbxref=Genbank:YP_008637703.1,GeneID:17152102;gbkey=CDS;gene=apaH;product=probable diadenosine tetraphosphatase;protein_id=YP_008637703.1;transl_table=11 probable diadenosine tetraphosphatase (1005438-1006382 -)	silent cgc -> cgT;	1138 1420 1646 1680 1811 220 301 3035 XCP123
NC_022541.1	1006238	g	g	g	A	g	g	A	g	g	A	g	A	g	A	g	A	g	A	A	g	g	g	g	g	g	g	A	cds808;Name=YP_008637703.1;Parent=gene864;Dbxref=Genbank:YP_008637703.1,GeneID:17152102;gbkey=CDS;gene=apaH;product=probable diadenosine tetraphosphatase;protein_id=YP_008637703.1;transl_table=11 probable diadenosine tetraphosphatase (1005438-1006382 -)	silent ctg -> Ttg;	1138 1420 1646 1680 1811 220 301 3035 XCP123
NC_022541.1	1006239	c	c	c	c	c	c	c	c	c	c	c	c	G	c	G	c	c	c	c	c	c	G	G	c	c	c	c	cds808;Name=YP_008637703.1;Parent=gene864;Dbxref=Genbank:YP_008637703.1,GeneID:17152102;gbkey=CDS;gene=apaH;product=probable diadenosine tetraphosphatase;protein_id=YP_008637703.1;transl_table=11 probable diadenosine tetraphosphatase (1005438-1006382 -)	silent acg -> acC;	1713 2064 556 557
NC_022541.1	1006251	t	t	t	t	t	t	t	t	t	t	t	t	C	t	C	t	t	t	t	t	t	C	C	t	t	t	t	cds808;Name=YP_008637703.1;Parent=gene864;Dbxref=Genbank:YP_008637703.1,GeneID:17152102;gbkey=CDS;gene=apaH;product=probable diadenosine tetraphosphatase;protein_id=YP_008637703.1;transl_table=11 probable diadenosine tetraphosphatase (1005438-1006382 -)	silent caa -> caG;	1713 2064 556 557
NC_022541.1	1006266	c	c	c	G	c	c	G	c	c	G	c	G	G	G	G	G	c	G	G	c	c	G	G	c	c	c	G	cds808;Name=YP_008637703.1;Parent=gene864;Dbxref=Genbank:YP_008637703.1,GeneID:17152102;gbkey=CDS;gene=apaH;product=probable diadenosine tetraphosphatase;protein_id=YP_008637703.1;transl_table=11 probable diadenosine tetraphosphatase (1005438-1006382 -)	silent gtg -> gtC;	1138 1420 1646 1680 1713 1811 2064 220 301 3035 556 557 XCP123
NC_022541.1	1006272	a	a	a	G	a	a	G	a	a	G	a	G	a	G	a	G	a	G	G	a	a	a	a	a	a	a	G	cds808;Name=YP_008637703.1;Parent=gene864;Dbxref=Genbank:YP_008637703.1,GeneID:17152102;gbkey=CDS;gene=apaH;product=probable diadenosine tetraphosphatase;protein_id=YP_008637703.1;transl_table=11 probable diadenosine tetraphosphatase (1005438-1006382 -)	silent gat -> gaC;	1138 1420 1646 1680 1811 220 301 3035 XCP123
NC_022541.1	1006329	t	t	t	t	t	t	t	t	t	t	t	t	C	t	C	t	t	t	t	t	t	C	C	t	t	t	t	cds808;Name=YP_008637703.1;Parent=gene864;Dbxref=Genbank:YP_008637703.1,GeneID:17152102;gbkey=CDS;gene=apaH;product=probable diadenosine tetraphosphatase;protein_id=YP_008637703.1;transl_table=11 probable diadenosine tetraphosphatase (1005438-1006382 -)	silent cga -> cgG;	1713 2064 556 557
NC_022541.1	1006329	t	t	t	G	t	t	G	t	t	G	t	G	t	G	t	G	t	G	G	t	t	t	t	t	t	t	G	cds808;Name=YP_008637703.1;Parent=gene864;Dbxref=Genbank:YP_008637703.1,GeneID:17152102;gbkey=CDS;gene=apaH;product=probable diadenosine tetraphosphatase;protein_id=YP_008637703.1;transl_table=11 probable diadenosine tetraphosphatase (1005438-1006382 -)	silent cga -> cgC;	1138 1420 1646 1680 1811 220 301 3035 XCP123
NC_022541.1	1006359	g	g	g	g	g	g	g	g	g	g	g	g	A	g	A	g	g	g	g	g	g	A	A	g	g	g	g	cds808;Name=YP_008637703.1;Parent=gene864;Dbxref=Genbank:YP_008637703.1,GeneID:17152102;gbkey=CDS;gene=apaH;product=probable diadenosine tetraphosphatase;protein_id=YP_008637703.1;transl_table=11 probable diadenosine tetraphosphatase (1005438-1006382 -)	silent gac -> gaT;	1713 2064 556 557
NC_022541.1	1006377	a	a	a	G	a	a	G	a	a	G	a	G	a	G	a	G	a	G	G	a	a	a	a	a	a	a	G	cds808;Name=YP_008637703.1;Parent=gene864;Dbxref=Genbank:YP_008637703.1,GeneID:17152102;gbkey=CDS;gene=apaH;product=probable diadenosine tetraphosphatase;protein_id=YP_008637703.1;transl_table=11 probable diadenosine tetraphosphatase (1005438-1006382 -)	silent agt -> agC;	1138 1420 1646 1680 1811 220 301 3035 XCP123
NC_022541.1	1006387	c	c	c	T	c	c	T	c	c	T	c	T	c	T	c	T	c	T	T	c	c	c	c	c	c	c	T			1138 1420 1646 1680 1811 220 301 3035 XCP123
NC_022541.1	1006408	c	c	c	T	c	c	T	c	c	T	c	T	c	T	c	T	c	T	T	c	c	c	c	c	c	c	T			1138 1420 1646 1680 1811 220 301 3035 XCP123
NC_022541.1	1006429	t	t	t	C	t	t	C	t	t	C	t	C	C	C	C	C	t	C	C	t	t	C	C	t	t	t	C	cds809;Name=YP_008637704.1;Parent=gene865;Dbxref=Genbank:YP_008637704.1,GeneID:17151718;gbkey=CDS;gene=apaG;product=probable protein ApaG%2C associated with Co2%2B and Mg2%2B efflux;protein_id=YP_008637704.1;transl_table=11 probable protein ApaG%2C associated with Co2%2B and Mg2%2B efflux (1006411-1006794 -)	silent gta -> gtG;	1138 1420 1646 1680 1713 1811 2064 220 301 3035 556 557 XCP123
NC_022541.1	1006519	t	t	t	G	t	t	G	t	t	G	t	G	G	G	G	G	t	G	G	t	t	G	G	t	t	t	G	cds809;Name=YP_008637704.1;Parent=gene865;Dbxref=Genbank:YP_008637704.1,GeneID:17151718;gbkey=CDS;gene=apaG;product=probable protein ApaG%2C associated with Co2%2B and Mg2%2B efflux;protein_id=YP_008637704.1;transl_table=11 probable protein ApaG%2C associated with Co2%2B and Mg2%2B efflux (1006411-1006794 -)	silent aca -> acC;	1138 1420 1646 1680 1713 1811 2064 220 301 3035 556 557 XCP123
NC_022541.1	1006531	t	t	t	C	t	t	C	t	t	C	t	C	t	C	t	C	t	C	C	t	t	t	t	t	t	t	C	cds809;Name=YP_008637704.1;Parent=gene865;Dbxref=Genbank:YP_008637704.1,GeneID:17151718;gbkey=CDS;gene=apaG;product=probable protein ApaG%2C associated with Co2%2B and Mg2%2B efflux;protein_id=YP_008637704.1;transl_table=11 probable protein ApaG%2C associated with Co2%2B and Mg2%2B efflux (1006411-1006794 -)	silent gta -> gtG;	1138 1420 1646 1680 1811 220 301 3035 XCP123
NC_022541.1	1006537	a	a	a	G	a	a	G	a	a	G	a	G	a	G	a	G	a	G	G	a	a	a	a	a	a	a	G	cds809;Name=YP_008637704.1;Parent=gene865;Dbxref=Genbank:YP_008637704.1,GeneID:17151718;gbkey=CDS;gene=apaG;product=probable protein ApaG%2C associated with Co2%2B and Mg2%2B efflux;protein_id=YP_008637704.1;transl_table=11 probable protein ApaG%2C associated with Co2%2B and Mg2%2B efflux (1006411-1006794 -)	silent tct -> tcC;	1138 1420 1646 1680 1811 220 301 3035 XCP123
NC_022541.1	1006552	c	c	c	A	c	c	A	c	c	A	c	A	c	A	c	A	c	A	A	c	c	c	c	c	c	c	A	cds809;Name=YP_008637704.1;Parent=gene865;Dbxref=Genbank:YP_008637704.1,GeneID:17151718;gbkey=CDS;gene=apaG;product=probable protein ApaG%2C associated with Co2%2B and Mg2%2B efflux;protein_id=YP_008637704.1;transl_table=11 probable protein ApaG%2C associated with Co2%2B and Mg2%2B efflux (1006411-1006794 -)	silent gcg -> gcT;	1138 1420 1646 1680 1811 220 301 3035 XCP123
NC_022541.1	1006555	t	t	t	C	t	t	C	t	t	C	t	C	t	C	t	C	t	C	C	t	t	t	t	t	t	t	C	cds809;Name=YP_008637704.1;Parent=gene865;Dbxref=Genbank:YP_008637704.1,GeneID:17151718;gbkey=CDS;gene=apaG;product=probable protein ApaG%2C associated with Co2%2B and Mg2%2B efflux;protein_id=YP_008637704.1;transl_table=11 probable protein ApaG%2C associated with Co2%2B and Mg2%2B efflux (1006411-1006794 -)	silent gaa -> gaG;	1138 1420 1646 1680 1811 220 301 3035 XCP123
NC_022541.1	1006591	c	c	c	G	c	c	G	c	c	G	c	G	c	G	c	G	c	G	G	c	c	c	c	c	c	c	G	cds809;Name=YP_008637704.1;Parent=gene865;Dbxref=Genbank:YP_008637704.1,GeneID:17151718;gbkey=CDS;gene=apaG;product=probable protein ApaG%2C associated with Co2%2B and Mg2%2B efflux;protein_id=YP_008637704.1;transl_table=11 probable protein ApaG%2C associated with Co2%2B and Mg2%2B efflux (1006411-1006794 -)	silent ggg -> ggC;	1138 1420 1646 1680 1811 220 301 3035 XCP123
NC_022541.1	1006597	a	a	a	G	a	a	G	a	a	G	a	G	G	G	G	G	a	G	G	a	a	G	G	a	a	a	G	cds809;Name=YP_008637704.1;Parent=gene865;Dbxref=Genbank:YP_008637704.1,GeneID:17151718;gbkey=CDS;gene=apaG;product=probable protein ApaG%2C associated with Co2%2B and Mg2%2B efflux;protein_id=YP_008637704.1;transl_table=11 probable protein ApaG%2C associated with Co2%2B and Mg2%2B efflux (1006411-1006794 -)	silent ggt -> ggC;	1138 1420 1646 1680 1713 1811 2064 220 301 3035 556 557 XCP123
NC_022541.1	10066	a	a	a	T	a	a	T	a	a	T	a	T	T	T	T	T	a	T	T	a	a	T	T	a	a	a	T	cds6;Name=YP_008636901.1;Parent=gene6;Dbxref=Genbank:YP_008636901.1,GeneID:17148936;gbkey=CDS;product=hypothetical protein;protein_id=YP_008636901.1;transl_table=11 hypothetical protein (9578-10771 +)	silent gga -> ggT;	1138 1420 1646 1680 1713 1811 2064 220 301 3035 556 557 XCP123
NC_022541.1	1006618	t	t	t	A	t	t	A	t	t	A	t	A	t	A	t	A	t	A	A	t	t	t	t	t	t	t	A	cds809;Name=YP_008637704.1;Parent=gene865;Dbxref=Genbank:YP_008637704.1,GeneID:17151718;gbkey=CDS;gene=apaG;product=probable protein ApaG%2C associated with Co2%2B and Mg2%2B efflux;protein_id=YP_008637704.1;transl_table=11 probable protein ApaG%2C associated with Co2%2B and Mg2%2B efflux (1006411-1006794 -)	silent gga -> ggT;	1138 1420 1646 1680 1811 220 301 3035 XCP123
NC_022541.1	1006647	g	g	g	g	g	g	g	g	g	g	g	g	g	g	g	g	g	g	g	g	g	g	g	g	g	g	A	cds809;Name=YP_008637704.1;Parent=gene865;Dbxref=Genbank:YP_008637704.1,GeneID:17151718;gbkey=CDS;gene=apaG;product=probable protein ApaG%2C associated with Co2%2B and Mg2%2B efflux;protein_id=YP_008637704.1;transl_table=11 probable protein ApaG%2C associated with Co2%2B and Mg2%2B efflux (1006411-1006794 -)	non-silent cgc -> Tgc;	XCP123
NC_022541.1	1006653	t	t	t	t	t	t	t	t	t	t	t	t	C	t	C	t	t	t	t	t	t	C	C	t	t	t	t	cds809;Name=YP_008637704.1;Parent=gene865;Dbxref=Genbank:YP_008637704.1,GeneID:17151718;gbkey=CDS;gene=apaG;product=probable protein ApaG%2C associated with Co2%2B and Mg2%2B efflux;protein_id=YP_008637704.1;transl_table=11 probable protein ApaG%2C associated with Co2%2B and Mg2%2B efflux (1006411-1006794 -)	non-silent atc -> Gtc;	1713 2064 556 557
NC_022541.1	1006669	t	t	t	C	t	t	C	t	t	C	t	C	C	C	C	C	t	C	C	t	t	C	C	t	t	t	C	cds809;Name=YP_008637704.1;Parent=gene865;Dbxref=Genbank:YP_008637704.1,GeneID:17151718;gbkey=CDS;gene=apaG;product=probable protein ApaG%2C associated with Co2%2B and Mg2%2B efflux;protein_id=YP_008637704.1;transl_table=11 probable protein ApaG%2C associated with Co2%2B and Mg2%2B efflux (1006411-1006794 -)	silent gca -> gcG;	1138 1420 1646 1680 1713 1811 2064 220 301 3035 556 557 XCP123
NC_022541.1	1006708	a	a	a	G	a	a	G	a	a	G	a	G	a	G	a	G	a	G	G	a	a	a	a	a	a	a	G	cds809;Name=YP_008637704.1;Parent=gene865;Dbxref=Genbank:YP_008637704.1,GeneID:17151718;gbkey=CDS;gene=apaG;product=probable protein ApaG%2C associated with Co2%2B and Mg2%2B efflux;protein_id=YP_008637704.1;transl_table=11 probable protein ApaG%2C associated with Co2%2B and Mg2%2B efflux (1006411-1006794 -)	silent tat -> taC;	1138 1420 1646 1680 1811 220 301 3035 XCP123
NC_022541.1	1006726	a	a	a	G	a	a	G	a	a	G	a	G	G	G	G	G	a	G	G	a	a	G	G	a	a	a	G	cds809;Name=YP_008637704.1;Parent=gene865;Dbxref=Genbank:YP_008637704.1,GeneID:17151718;gbkey=CDS;gene=apaG;product=probable protein ApaG%2C associated with Co2%2B and Mg2%2B efflux;protein_id=YP_008637704.1;transl_table=11 probable protein ApaG%2C associated with Co2%2B and Mg2%2B efflux (1006411-1006794 -)	silent act -> acC;	1138 1420 1646 1680 1713 1811 2064 220 301 3035 556 557 XCP123
NC_022541.1	100677	t	t	t	G	t	t	G	t	t	G	t	G	t	G	t	G	t	G	G	t	t	t	t	t	t	t	G	cds81;Name=YP_008636976.1;Parent=gene84;Dbxref=Genbank:YP_008636976.1,GeneID:17152343;gbkey=CDS;gene=kduI;product=5-keto 4-deoxyuronate isomerase%2C probable;protein_id=YP_008636976.1;transl_table=11 5-keto 4-deoxyuronate isomerase%2C probable (100259-101113 -)	non-silent aag -> aCg;	1138 1420 1646 1680 1811 220 301 3035 XCP123
NC_022541.1	1006797	t	t	t	C	t	t	C	t	t	C	t	C	C	C	C	C	t	C	C	t	t	C	C	t	t	t	C			1138 1420 1646 1680 1713 1811 2064 220 301 3035 556 557 XCP123
NC_022541.1	1006824	a	a	a	G	a	a	G	a	a	G	a	G	a	G	a	G	a	G	G	a	a	a	a	a	a	a	G			1138 1420 1646 1680 1811 220 301 3035 XCP123
NC_022541.1	1006838	a	a	a	G	a	a	G	a	a	G	a	G	a	G	a	G	a	G	G	a	a	a	a	a	a	a	G	cds810;Name=YP_008637705.1;Parent=gene866;Dbxref=Genbank:YP_008637705.1,GeneID:17151717;gbkey=CDS;gene=rsmA;product=probable dimethyladenosine transferase protein;protein_id=YP_008637705.1;transl_table=11 probable dimethyladenosine transferase protein (1006831-1007619 -)	non-silent ctg -> cCg;	1138 1420 1646 1680 1811 220 301 3035 XCP123
NC_022541.1	1006852	c	c	c	c	c	c	c	c	c	c	c	c	T	c	T	c	c	c	c	c	c	T	T	c	c	c	c	cds810;Name=YP_008637705.1;Parent=gene866;Dbxref=Genbank:YP_008637705.1,GeneID:17151717;gbkey=CDS;gene=rsmA;product=probable dimethyladenosine transferase protein;protein_id=YP_008637705.1;transl_table=11 probable dimethyladenosine transferase protein (1006831-1007619 -)	silent ctg -> ctA;	1713 2064 556 557
NC_022541.1	1006867	g	g	g	C	g	g	C	g	g	C	g	C	g	C	g	C	g	C	C	g	g	g	g	g	g	g	C	cds810;Name=YP_008637705.1;Parent=gene866;Dbxref=Genbank:YP_008637705.1,GeneID:17151717;gbkey=CDS;gene=rsmA;product=probable dimethyladenosine transferase protein;protein_id=YP_008637705.1;transl_table=11 probable dimethyladenosine transferase protein (1006831-1007619 -)	silent gcc -> gcG;	1138 1420 1646 1680 1811 220 301 3035 XCP123
NC_022541.1	1006876	g	g	g	g	g	g	g	g	g	g	g	g	A	g	A	g	g	g	g	g	g	A	A	g	g	g	g	cds810;Name=YP_008637705.1;Parent=gene866;Dbxref=Genbank:YP_008637705.1,GeneID:17151717;gbkey=CDS;gene=rsmA;product=probable dimethyladenosine transferase protein;protein_id=YP_008637705.1;transl_table=11 probable dimethyladenosine transferase protein (1006831-1007619 -)	silent ctc -> ctT;	1713 2064 556 557
NC_022541.1	1006894	g	g	g	A	g	g	A	g	g	A	g	A	A	A	A	A	g	A	A	g	g	A	A	g	g	g	A	cds810;Name=YP_008637705.1;Parent=gene866;Dbxref=Genbank:YP_008637705.1,GeneID:17151717;gbkey=CDS;gene=rsmA;product=probable dimethyladenosine transferase protein;protein_id=YP_008637705.1;transl_table=11 probable dimethyladenosine transferase protein (1006831-1007619 -)	silent gac -> gaT;	1138 1420 1646 1680 1713 1811 2064 220 301 3035 556 557 XCP123
NC_022541.1	1006900	g	g	g	T	g	g	T	g	g	T	g	T	g	T	g	T	g	T	T	g	g	g	g	g	g	g	T	cds810;Name=YP_008637705.1;Parent=gene866;Dbxref=Genbank:YP_008637705.1,GeneID:17151717;gbkey=CDS;gene=rsmA;product=probable dimethyladenosine transferase protein;protein_id=YP_008637705.1;transl_table=11 probable dimethyladenosine transferase protein (1006831-1007619 -)	silent cgc -> cgA;	1138 1420 1646 1680 1811 220 301 3035 XCP123
NC_022541.1	1006902	g	g	g	T	g	g	T	g	g	T	g	T	g	T	g	T	g	T	T	g	g	g	g	g	g	g	T	cds810;Name=YP_008637705.1;Parent=gene866;Dbxref=Genbank:YP_008637705.1,GeneID:17151717;gbkey=CDS;gene=rsmA;product=probable dimethyladenosine transferase protein;protein_id=YP_008637705.1;transl_table=11 probable dimethyladenosine transferase protein (1006831-1007619 -)	non-silent cgc -> Agc;	1138 1420 1646 1680 1811 220 301 3035 XCP123
NC_022541.1	1006915	g	g	g	C	g	g	C	g	g	C	g	C	g	C	g	C	g	C	C	g	g	g	g	g	g	g	C	cds810;Name=YP_008637705.1;Parent=gene866;Dbxref=Genbank:YP_008637705.1,GeneID:17151717;gbkey=CDS;gene=rsmA;product=probable dimethyladenosine transferase protein;protein_id=YP_008637705.1;transl_table=11 probable dimethyladenosine transferase protein (1006831-1007619 -)	non-silent gac -> gaG;	1138 1420 1646 1680 1811 220 301 3035 XCP123
NC_022541.1	1006921	g	g	g	A	g	g	A	g	g	A	g	A	g	A	g	A	g	A	A	g	g	g	g	g	g	g	A	cds810;Name=YP_008637705.1;Parent=gene866;Dbxref=Genbank:YP_008637705.1,GeneID:17151717;gbkey=CDS;gene=rsmA;product=probable dimethyladenosine transferase protein;protein_id=YP_008637705.1;transl_table=11 probable dimethyladenosine transferase protein (1006831-1007619 -)	silent cac -> caT;	1138 1420 1646 1680 1811 220 301 3035 XCP123
NC_022541.1	1006930	t	t	t	C	t	t	C	t	t	C	t	C	t	C	t	C	t	C	C	t	t	t	t	t	t	t	C	cds810;Name=YP_008637705.1;Parent=gene866;Dbxref=Genbank:YP_008637705.1,GeneID:17151717;gbkey=CDS;gene=rsmA;product=probable dimethyladenosine transferase protein;protein_id=YP_008637705.1;transl_table=11 probable dimethyladenosine transferase protein (1006831-1007619 -)	silent gaa -> gaG;	1138 1420 1646 1680 1811 220 301 3035 XCP123
NC_022541.1	1006936	a	a	a	G	a	a	G	a	a	G	a	G	a	G	a	G	a	G	G	a	a	a	a	a	a	a	G	cds810;Name=YP_008637705.1;Parent=gene866;Dbxref=Genbank:YP_008637705.1,GeneID:17151717;gbkey=CDS;gene=rsmA;product=probable dimethyladenosine transferase protein;protein_id=YP_008637705.1;transl_table=11 probable dimethyladenosine transferase protein (1006831-1007619 -)	silent att -> atC;	1138 1420 1646 1680 1811 220 301 3035 XCP123
NC_022541.1	1006941	c	c	c	T	c	c	T	c	c	T	c	T	c	T	c	T	c	T	T	c	c	c	c	c	c	c	T	cds810;Name=YP_008637705.1;Parent=gene866;Dbxref=Genbank:YP_008637705.1,GeneID:17151717;gbkey=CDS;gene=rsmA;product=probable dimethyladenosine transferase protein;protein_id=YP_008637705.1;transl_table=11 probable dimethyladenosine transferase protein (1006831-1007619 -)	non-silent gcc -> Acc;	1138 1420 1646 1680 1811 220 301 3035 XCP123
NC_022541.1	1006996	g	g	g	A	g	g	A	g	g	A	g	A	A	A	A	A	g	A	A	g	g	A	A	g	g	g	A	cds810;Name=YP_008637705.1;Parent=gene866;Dbxref=Genbank:YP_008637705.1,GeneID:17151717;gbkey=CDS;gene=rsmA;product=probable dimethyladenosine transferase protein;protein_id=YP_008637705.1;transl_table=11 probable dimethyladenosine transferase protein (1006831-1007619 -)	silent gac -> gaT;	1138 1420 1646 1680 1713 1811 2064 220 301 3035 556 557 XCP123
NC_022541.1	1007024	a	a	a	T	a	a	T	a	a	T	a	T	a	T	a	T	a	T	T	a	a	a	a	a	a	a	T	cds810;Name=YP_008637705.1;Parent=gene866;Dbxref=Genbank:YP_008637705.1,GeneID:17151717;gbkey=CDS;gene=rsmA;product=probable dimethyladenosine transferase protein;protein_id=YP_008637705.1;transl_table=11 probable dimethyladenosine transferase protein (1006831-1007619 -)	non-silent ctg -> cAg;	1138 1420 1646 1680 1811 220 301 3035 XCP123
NC_022541.1	1007028	t	t	t	C	t	t	C	t	t	C	t	C	C	C	C	C	t	C	C	t	t	C	C	t	t	t	C	cds810;Name=YP_008637705.1;Parent=gene866;Dbxref=Genbank:YP_008637705.1,GeneID:17151717;gbkey=CDS;gene=rsmA;product=probable dimethyladenosine transferase protein;protein_id=YP_008637705.1;transl_table=11 probable dimethyladenosine transferase protein (1006831-1007619 -)	non-silent atg -> Gtg;	1138 1420 1646 1680 1713 1811 2064 220 301 3035 556 557 XCP123
NC_022541.1	1007038	a	a	a	G	a	a	G	a	a	G	a	G	a	G	a	G	a	G	G	a	a	a	a	a	a	a	G	cds810;Name=YP_008637705.1;Parent=gene866;Dbxref=Genbank:YP_008637705.1,GeneID:17151717;gbkey=CDS;gene=rsmA;product=probable dimethyladenosine transferase protein;protein_id=YP_008637705.1;transl_table=11 probable dimethyladenosine transferase protein (1006831-1007619 -)	silent gat -> gaC;	1138 1420 1646 1680 1811 220 301 3035 XCP123
NC_022541.1	1007062	t	t	t	G	t	t	G	t	t	G	t	G	t	G	t	G	t	G	G	t	t	t	t	t	t	t	G	cds810;Name=YP_008637705.1;Parent=gene866;Dbxref=Genbank:YP_008637705.1,GeneID:17151717;gbkey=CDS;gene=rsmA;product=probable dimethyladenosine transferase protein;protein_id=YP_008637705.1;transl_table=11 probable dimethyladenosine transferase protein (1006831-1007619 -)	silent gca -> gcC;	1138 1420 1646 1680 1811 220 301 3035 XCP123
NC_022541.1	1007092	g	g	g	C	g	g	C	g	g	C	g	C	g	C	g	C	g	C	C	g	g	g	g	g	g	g	C	cds810;Name=YP_008637705.1;Parent=gene866;Dbxref=Genbank:YP_008637705.1,GeneID:17151717;gbkey=CDS;gene=rsmA;product=probable dimethyladenosine transferase protein;protein_id=YP_008637705.1;transl_table=11 probable dimethyladenosine transferase protein (1006831-1007619 -)	silent gcc -> gcG;	1138 1420 1646 1680 1811 220 301 3035 XCP123
NC_022541.1	1007092	g	g	g	g	g	g	g	g	g	g	g	g	T	g	T	g	g	g	g	g	g	T	T	g	g	g	g	cds810;Name=YP_008637705.1;Parent=gene866;Dbxref=Genbank:YP_008637705.1,GeneID:17151717;gbkey=CDS;gene=rsmA;product=probable dimethyladenosine transferase protein;protein_id=YP_008637705.1;transl_table=11 probable dimethyladenosine transferase protein (1006831-1007619 -)	silent gcc -> gcA;	1713 2064 556 557
NC_022541.1	1007095	g	g	g	A	g	g	A	g	g	A	g	A	g	A	g	A	g	A	A	g	g	g	g	g	g	g	A	cds810;Name=YP_008637705.1;Parent=gene866;Dbxref=Genbank:YP_008637705.1,GeneID:17151717;gbkey=CDS;gene=rsmA;product=probable dimethyladenosine transferase protein;protein_id=YP_008637705.1;transl_table=11 probable dimethyladenosine transferase protein (1006831-1007619 -)	silent ggc -> ggT;	1138 1420 1646 1680 1811 220 301 3035 XCP123
NC_022541.1	10071	c	c	c	T	c	c	T	c	c	T	c	T	c	T	c	T	c	T	T	c	c	c	c	c	c	c	T	cds6;Name=YP_008636901.1;Parent=gene6;Dbxref=Genbank:YP_008636901.1,GeneID:17148936;gbkey=CDS;product=hypothetical protein;protein_id=YP_008636901.1;transl_table=11 hypothetical protein (9578-10771 +)	non-silent gcc -> gTc;	1138 1420 1646 1680 1811 220 301 3035 XCP123
NC_022541.1	1007107	c	c	c	c	c	c	c	c	c	c	c	c	T	c	T	c	c	c	c	c	c	T	T	c	c	c	c	cds810;Name=YP_008637705.1;Parent=gene866;Dbxref=Genbank:YP_008637705.1,GeneID:17151717;gbkey=CDS;gene=rsmA;product=probable dimethyladenosine transferase protein;protein_id=YP_008637705.1;transl_table=11 probable dimethyladenosine transferase protein (1006831-1007619 -)	silent gtg -> gtA;	1713 2064 556 557
NC_022541.1	1007152	g	g	g	A	g	g	A	g	g	A	g	A	g	A	g	A	g	A	A	g	g	g	g	g	g	g	A	cds810;Name=YP_008637705.1;Parent=gene866;Dbxref=Genbank:YP_008637705.1,GeneID:17151717;gbkey=CDS;gene=rsmA;product=probable dimethyladenosine transferase protein;protein_id=YP_008637705.1;transl_table=11 probable dimethyladenosine transferase protein (1006831-1007619 -)	silent ctc -> ctT;	1138 1420 1646 1680 1811 220 301 3035 XCP123
NC_022541.1	1007152	g	g	g	g	g	g	g	g	g	g	g	g	C	g	C	g	g	g	g	g	g	C	C	g	g	g	g	cds810;Name=YP_008637705.1;Parent=gene866;Dbxref=Genbank:YP_008637705.1,GeneID:17151717;gbkey=CDS;gene=rsmA;product=probable dimethyladenosine transferase protein;protein_id=YP_008637705.1;transl_table=11 probable dimethyladenosine transferase protein (1006831-1007619 -)	silent ctc -> ctG;	1713 2064 556 557
NC_022541.1	1007154	g	g	g	g	g	g	g	g	g	g	g	g	A	g	A	g	g	g	g	g	g	A	A	g	g	g	g	cds810;Name=YP_008637705.1;Parent=gene866;Dbxref=Genbank:YP_008637705.1,GeneID:17151717;gbkey=CDS;gene=rsmA;product=probable dimethyladenosine transferase protein;protein_id=YP_008637705.1;transl_table=11 probable dimethyladenosine transferase protein (1006831-1007619 -)	non-silent ctc -> Ttc;	1713 2064 556 557
NC_022541.1	100723	t	t	t	G	t	t	G	t	t	G	t	G	t	G	t	G	t	G	G	t	t	t	t	t	t	t	G	cds81;Name=YP_008636976.1;Parent=gene84;Dbxref=Genbank:YP_008636976.1,GeneID:17152343;gbkey=CDS;gene=kduI;product=5-keto 4-deoxyuronate isomerase%2C probable;protein_id=YP_008636976.1;transl_table=11 5-keto 4-deoxyuronate isomerase%2C probable (100259-101113 -)	non-silent aag -> Cag;	1138 1420 1646 1680 1811 220 301 3035 XCP123
NC_022541.1	1007278	a	a	a	G	a	a	G	a	a	G	a	G	a	G	a	G	a	G	G	a	a	a	a	a	a	a	G	cds810;Name=YP_008637705.1;Parent=gene866;Dbxref=Genbank:YP_008637705.1,GeneID:17151717;gbkey=CDS;gene=rsmA;product=probable dimethyladenosine transferase protein;protein_id=YP_008637705.1;transl_table=11 probable dimethyladenosine transferase protein (1006831-1007619 -)	silent att -> atC;	1138 1420 1646 1680 1811 220 301 3035 XCP123
NC_022541.1	1007306	c	c	c	c	c	c	c	c	c	c	c	c	c	c	c	c	c	c	T	c	c	c	c	c	c	c	c	cds810;Name=YP_008637705.1;Parent=gene866;Dbxref=Genbank:YP_008637705.1,GeneID:17151717;gbkey=CDS;gene=rsmA;product=probable dimethyladenosine transferase protein;protein_id=YP_008637705.1;transl_table=11 probable dimethyladenosine transferase protein (1006831-1007619 -)	non-silent cgc -> cAc;	3035
NC_022541.1	1007309	a	a	a	a	a	a	a	a	a	a	a	a	G	a	G	a	a	a	a	a	a	G	G	a	a	a	a	cds810;Name=YP_008637705.1;Parent=gene866;Dbxref=Genbank:YP_008637705.1,GeneID:17151717;gbkey=CDS;gene=rsmA;product=probable dimethyladenosine transferase protein;protein_id=YP_008637705.1;transl_table=11 probable dimethyladenosine transferase protein (1006831-1007619 -)	non-silent atc -> aCc;	1713 2064 556 557
NC_022541.1	1007331	t	t	t	C	t	t	C	t	t	C	t	C	C	C	C	C	t	C	C	t	t	C	C	t	t	t	C	cds810;Name=YP_008637705.1;Parent=gene866;Dbxref=Genbank:YP_008637705.1,GeneID:17151717;gbkey=CDS;gene=rsmA;product=probable dimethyladenosine transferase protein;protein_id=YP_008637705.1;transl_table=11 probable dimethyladenosine transferase protein (1006831-1007619 -)	non-silent aca -> Gca;	1138 1420 1646 1680 1713 1811 2064 220 301 3035 556 557 XCP123
NC_022541.1	100734	g	g	g	g	g	g	g	g	g	g	g	g	C	g	C	g	g	g	g	g	g	C	C	g	g	g	g	cds81;Name=YP_008636976.1;Parent=gene84;Dbxref=Genbank:YP_008636976.1,GeneID:17152343;gbkey=CDS;gene=kduI;product=5-keto 4-deoxyuronate isomerase%2C probable;protein_id=YP_008636976.1;transl_table=11 5-keto 4-deoxyuronate isomerase%2C probable (100259-101113 -)	non-silent gcc -> gGc;	1713 2064 556 557
NC_022541.1	1007353	a	a	a	G	a	a	G	a	a	G	a	G	a	G	a	G	a	G	G	a	a	a	a	a	a	a	G	cds810;Name=YP_008637705.1;Parent=gene866;Dbxref=Genbank:YP_008637705.1,GeneID:17151717;gbkey=CDS;gene=rsmA;product=probable dimethyladenosine transferase protein;protein_id=YP_008637705.1;transl_table=11 probable dimethyladenosine transferase protein (1006831-1007619 -)	silent gat -> gaC;	1138 1420 1646 1680 1811 220 301 3035 XCP123
NC_022541.1	1007362	g	g	g	A	g	g	A	g	g	A	g	A	g	A	g	A	g	A	A	g	g	g	g	g	g	g	A	cds810;Name=YP_008637705.1;Parent=gene866;Dbxref=Genbank:YP_008637705.1,GeneID:17151717;gbkey=CDS;gene=rsmA;product=probable dimethyladenosine transferase protein;protein_id=YP_008637705.1;transl_table=11 probable dimethyladenosine transferase protein (1006831-1007619 -)	silent atc -> atT;	1138 1420 1646 1680 1811 220 301 3035 XCP123
NC_022541.1	1007370	g	g	g	T	g	g	T	g	g	T	g	T	g	T	g	T	g	T	T	g	g	g	g	g	g	g	T	cds810;Name=YP_008637705.1;Parent=gene866;Dbxref=Genbank:YP_008637705.1,GeneID:17151717;gbkey=CDS;gene=rsmA;product=probable dimethyladenosine transferase protein;protein_id=YP_008637705.1;transl_table=11 probable dimethyladenosine transferase protein (1006831-1007619 -)	non-silent cgc -> Agc;	1138 1420 1646 1680 1811 220 301 3035 XCP123
NC_022541.1	1007373	a	a	a	G	a	a	G	a	a	G	a	G	a	G	a	G	a	G	G	a	a	a	a	a	a	a	G	cds810;Name=YP_008637705.1;Parent=gene866;Dbxref=Genbank:YP_008637705.1,GeneID:17151717;gbkey=CDS;gene=rsmA;product=probable dimethyladenosine transferase protein;protein_id=YP_008637705.1;transl_table=11 probable dimethyladenosine transferase protein (1006831-1007619 -)	silent ttg -> Ctg;	1138 1420 1646 1680 1811 220 301 3035 XCP123
NC_022541.1	1007374	t	t	t	C	t	t	C	t	t	C	t	C	t	C	t	C	t	C	C	t	t	t	t	t	t	t	C	cds810;Name=YP_008637705.1;Parent=gene866;Dbxref=Genbank:YP_008637705.1,GeneID:17151717;gbkey=CDS;gene=rsmA;product=probable dimethyladenosine transferase protein;protein_id=YP_008637705.1;transl_table=11 probable dimethyladenosine transferase protein (1006831-1007619 -)	silent gca -> gcG;	1138 1420 1646 1680 1811 220 301 3035 XCP123
NC_022541.1	1007386	c	c	c	T	c	c	T	c	c	T	c	T	T	T	T	T	c	T	T	c	c	T	T	c	c	c	T	cds810;Name=YP_008637705.1;Parent=gene866;Dbxref=Genbank:YP_008637705.1,GeneID:17151717;gbkey=CDS;gene=rsmA;product=probable dimethyladenosine transferase protein;protein_id=YP_008637705.1;transl_table=11 probable dimethyladenosine transferase protein (1006831-1007619 -)	silent gcg -> gcA;	1138 1420 1646 1680 1713 1811 2064 220 301 3035 556 557 XCP123
NC_022541.1	1007389	c	c	c	G	c	c	G	c	c	G	c	G	c	G	c	G	c	G	G	c	c	c	c	c	c	c	G	cds810;Name=YP_008637705.1;Parent=gene866;Dbxref=Genbank:YP_008637705.1,GeneID:17151717;gbkey=CDS;gene=rsmA;product=probable dimethyladenosine transferase protein;protein_id=YP_008637705.1;transl_table=11 probable dimethyladenosine transferase protein (1006831-1007619 -)	silent gcg -> gcC;	1138 1420 1646 1680 1811 220 301 3035 XCP123
NC_022541.1	1007392	g	g	g	C	g	g	C	g	g	C	g	C	g	C	g	C	g	C	C	g	g	g	g	g	g	g	C	cds810;Name=YP_008637705.1;Parent=gene866;Dbxref=Genbank:YP_008637705.1,GeneID:17151717;gbkey=CDS;gene=rsmA;product=probable dimethyladenosine transferase protein;protein_id=YP_008637705.1;transl_table=11 probable dimethyladenosine transferase protein (1006831-1007619 -)	silent gcc -> gcG;	1138 1420 1646 1680 1811 220 301 3035 XCP123
NC_022541.1	1007395	c	c	c	T	c	c	T	c	c	T	c	T	T	T	T	T	c	T	T	c	c	T	T	c	c	c	T	cds810;Name=YP_008637705.1;Parent=gene866;Dbxref=Genbank:YP_008637705.1,GeneID:17151717;gbkey=CDS;gene=rsmA;product=probable dimethyladenosine transferase protein;protein_id=YP_008637705.1;transl_table=11 probable dimethyladenosine transferase protein (1006831-1007619 -)	silent gag -> gaA;	1138 1420 1646 1680 1713 1811 2064 220 301 3035 556 557 XCP123
NC_022541.1	1007434	g	g	g	C	g	g	C	g	g	C	g	C	g	C	g	C	g	C	C	g	g	g	g	g	g	g	C	cds810;Name=YP_008637705.1;Parent=gene866;Dbxref=Genbank:YP_008637705.1,GeneID:17151717;gbkey=CDS;gene=rsmA;product=probable dimethyladenosine transferase protein;protein_id=YP_008637705.1;transl_table=11 probable dimethyladenosine transferase protein (1006831-1007619 -)	silent gtc -> gtG;	1138 1420 1646 1680 1811 220 301 3035 XCP123
NC_022541.1	1007442	g	g	g	A	g	g	A	g	g	A	g	A	g	A	g	A	g	A	A	g	g	g	g	g	g	g	A	cds810;Name=YP_008637705.1;Parent=gene866;Dbxref=Genbank:YP_008637705.1,GeneID:17151717;gbkey=CDS;gene=rsmA;product=probable dimethyladenosine transferase protein;protein_id=YP_008637705.1;transl_table=11 probable dimethyladenosine transferase protein (1006831-1007619 -)	silent ctg -> Ttg;	1138 1420 1646 1680 1811 220 301 3035 XCP123
NC_022541.1	1007443	c	c	c	G	c	c	G	c	c	G	c	G	c	G	c	G	c	G	G	c	c	c	c	c	c	c	G	cds810;Name=YP_008637705.1;Parent=gene866;Dbxref=Genbank:YP_008637705.1,GeneID:17151717;gbkey=CDS;gene=rsmA;product=probable dimethyladenosine transferase protein;protein_id=YP_008637705.1;transl_table=11 probable dimethyladenosine transferase protein (1006831-1007619 -)	silent gcg -> gcC;	1138 1420 1646 1680 1811 220 301 3035 XCP123
NC_022541.1	100748	g	g	g	A	g	g	A	g	g	A	g	A	g	A	g	A	g	A	A	g	g	g	g	g	g	g	A	cds81;Name=YP_008636976.1;Parent=gene84;Dbxref=Genbank:YP_008636976.1,GeneID:17152343;gbkey=CDS;gene=kduI;product=5-keto 4-deoxyuronate isomerase%2C probable;protein_id=YP_008636976.1;transl_table=11 5-keto 4-deoxyuronate isomerase%2C probable (100259-101113 -)	silent gcc -> gcT;	1138 1420 1646 1680 1811 220 301 3035 XCP123
NC_022541.1	1007488	t	t	t	C	t	t	C	t	t	C	t	C	C	C	C	C	t	C	C	t	t	C	C	t	t	t	C	cds810;Name=YP_008637705.1;Parent=gene866;Dbxref=Genbank:YP_008637705.1,GeneID:17151717;gbkey=CDS;gene=rsmA;product=probable dimethyladenosine transferase protein;protein_id=YP_008637705.1;transl_table=11 probable dimethyladenosine transferase protein (1006831-1007619 -)	silent cca -> ccG;	1138 1420 1646 1680 1713 1811 2064 220 301 3035 556 557 XCP123
NC_022541.1	1007550	t	t	t	t	t	t	t	t	t	t	t	t	C	t	C	t	t	t	t	t	t	C	C	t	t	t	t	cds810;Name=YP_008637705.1;Parent=gene866;Dbxref=Genbank:YP_008637705.1,GeneID:17151717;gbkey=CDS;gene=rsmA;product=probable dimethyladenosine transferase protein;protein_id=YP_008637705.1;transl_table=11 probable dimethyladenosine transferase protein (1006831-1007619 -)	non-silent atc -> Gtc;	1713 2064 556 557
NC_022541.1	1007608	a	a	a	G	a	a	G	a	a	G	a	G	a	G	a	G	a	G	G	a	a	a	a	a	a	a	G	cds810;Name=YP_008637705.1;Parent=gene866;Dbxref=Genbank:YP_008637705.1,GeneID:17151717;gbkey=CDS;gene=rsmA;product=probable dimethyladenosine transferase protein;protein_id=YP_008637705.1;transl_table=11 probable dimethyladenosine transferase protein (1006831-1007619 -)	silent tct -> tcC;	1138 1420 1646 1680 1811 220 301 3035 XCP123
NC_022541.1	1007632	g	g	g	A	g	g	A	g	g	A	g	A	A	A	A	A	g	A	A	g	g	A	A	g	g	g	A			1138 1420 1646 1680 1713 1811 2064 220 301 3035 556 557 XCP123
NC_022541.1	1007689	g	g	g	A	g	g	A	g	g	A	g	A	g	A	g	A	g	A	A	g	g	g	g	g	g	g	A			1138 1420 1646 1680 1811 220 301 3035 XCP123
NC_022541.1	1007699	c	c	c	c	c	c	c	c	c	c	c	c	T	c	T	c	c	c	c	c	c	T	T	c	c	c	c			1713 2064 556 557
NC_022541.1	1007712	c	c	c	T	c	c	T	c	c	T	c	T	c	T	c	T	c	T	T	c	c	c	c	c	c	c	T			1138 1420 1646 1680 1811 220 301 3035 XCP123
NC_022541.1	1007720	a	a	a	C	a	a	C	a	a	C	a	C	a	C	a	C	a	C	C	a	a	a	a	a	a	a	C			1138 1420 1646 1680 1811 220 301 3035 XCP123
NC_022541.1	1007724	g	g	g	A	g	g	A	g	g	A	g	A	g	A	g	A	g	A	A	g	g	g	g	g	g	g	A			1138 1420 1646 1680 1811 220 301 3035 XCP123
NC_022541.1	1007729	g	g	g	A	g	g	A	g	g	A	g	A	g	A	g	A	g	A	A	g	g	g	g	g	g	g	A			1138 1420 1646 1680 1811 220 301 3035 XCP123
NC_022541.1	1007732	t	t	t	G	t	t	G	t	t	G	t	G	t	G	t	G	t	G	G	t	t	t	t	t	t	t	G			1138 1420 1646 1680 1811 220 301 3035 XCP123
NC_022541.1	1007755	t	t	t	G	t	t	G	t	t	G	t	G	t	G	t	G	t	G	G	t	t	t	t	t	t	t	G	cds811;Name=YP_008637706.1;Parent=gene867;Dbxref=Genbank:YP_008637706.1,GeneID:17152846;gbkey=CDS;gene=pdxA;product=probable 4-hydroxythreonine-4-phosphate dehydrogenase;protein_id=YP_008637706.1;transl_table=11 probable 4-hydroxythreonine-4-phosphate dehydrogenase (1007737-1008708 -)	silent cga -> cgC;	1138 1420 1646 1680 1811 220 301 3035 XCP123
NC_022541.1	1007761	a	a	a	G	a	a	G	a	a	G	a	G	G	G	G	G	a	G	G	a	a	G	G	a	a	a	G	cds811;Name=YP_008637706.1;Parent=gene867;Dbxref=Genbank:YP_008637706.1,GeneID:17152846;gbkey=CDS;gene=pdxA;product=probable 4-hydroxythreonine-4-phosphate dehydrogenase;protein_id=YP_008637706.1;transl_table=11 probable 4-hydroxythreonine-4-phosphate dehydrogenase (1007737-1008708 -)	silent tgt -> tgC;	1138 1420 1646 1680 1713 1811 2064 220 301 3035 556 557 XCP123
NC_022541.1	1007776	c	c	c	T	c	c	T	c	c	T	c	T	c	T	c	T	c	T	T	c	c	c	c	c	c	c	T	cds811;Name=YP_008637706.1;Parent=gene867;Dbxref=Genbank:YP_008637706.1,GeneID:17152846;gbkey=CDS;gene=pdxA;product=probable 4-hydroxythreonine-4-phosphate dehydrogenase;protein_id=YP_008637706.1;transl_table=11 probable 4-hydroxythreonine-4-phosphate dehydrogenase (1007737-1008708 -)	silent gcg -> gcA;	1138 1420 1646 1680 1811 220 301 3035 XCP123
NC_022541.1	1007797	c	c	c	T	c	c	T	c	c	T	c	T	c	T	c	T	c	T	T	c	c	c	c	c	c	c	T	cds811;Name=YP_008637706.1;Parent=gene867;Dbxref=Genbank:YP_008637706.1,GeneID:17152846;gbkey=CDS;gene=pdxA;product=probable 4-hydroxythreonine-4-phosphate dehydrogenase;protein_id=YP_008637706.1;transl_table=11 probable 4-hydroxythreonine-4-phosphate dehydrogenase (1007737-1008708 -)	silent gcg -> gcA;	1138 1420 1646 1680 1811 220 301 3035 XCP123
NC_022541.1	1007830	c	c	c	A	c	c	A	c	c	A	c	A	c	A	c	A	c	A	A	c	c	c	c	c	c	c	A	cds811;Name=YP_008637706.1;Parent=gene867;Dbxref=Genbank:YP_008637706.1,GeneID:17152846;gbkey=CDS;gene=pdxA;product=probable 4-hydroxythreonine-4-phosphate dehydrogenase;protein_id=YP_008637706.1;transl_table=11 probable 4-hydroxythreonine-4-phosphate dehydrogenase (1007737-1008708 -)	silent ggg -> ggT;	1138 1420 1646 1680 1811 220 301 3035 XCP123
NC_022541.1	1007845	c	c	c	A	c	c	A	c	c	A	c	A	c	A	c	A	c	A	A	c	c	c	c	c	c	c	A	cds811;Name=YP_008637706.1;Parent=gene867;Dbxref=Genbank:YP_008637706.1,GeneID:17152846;gbkey=CDS;gene=pdxA;product=probable 4-hydroxythreonine-4-phosphate dehydrogenase;protein_id=YP_008637706.1;transl_table=11 probable 4-hydroxythreonine-4-phosphate dehydrogenase (1007737-1008708 -)	silent gtg -> gtT;	1138 1420 1646 1680 1811 220 301 3035 XCP123
NC_022541.1	1007866	c	c	c	A	c	c	A	c	c	A	c	A	c	A	c	A	c	A	A	c	c	c	c	c	c	c	A	cds811;Name=YP_008637706.1;Parent=gene867;Dbxref=Genbank:YP_008637706.1,GeneID:17152846;gbkey=CDS;gene=pdxA;product=probable 4-hydroxythreonine-4-phosphate dehydrogenase;protein_id=YP_008637706.1;transl_table=11 probable 4-hydroxythreonine-4-phosphate dehydrogenase (1007737-1008708 -)	silent ctg -> ctT;	1138 1420 1646 1680 1811 220 301 3035 XCP123
NC_022541.1	1007875	a	a	a	G	a	a	G	a	a	G	a	G	a	G	a	G	a	G	G	a	a	a	a	a	a	a	G	cds811;Name=YP_008637706.1;Parent=gene867;Dbxref=Genbank:YP_008637706.1,GeneID:17152846;gbkey=CDS;gene=pdxA;product=probable 4-hydroxythreonine-4-phosphate dehydrogenase;protein_id=YP_008637706.1;transl_table=11 probable 4-hydroxythreonine-4-phosphate dehydrogenase (1007737-1008708 -)	silent aat -> aaC;	1138 1420 1646 1680 1811 220 301 3035 XCP123
NC_022541.1	1007881	c	c	c	T	c	c	T	c	c	T	c	T	c	T	c	T	c	T	T	c	c	c	c	c	c	c	T	cds811;Name=YP_008637706.1;Parent=gene867;Dbxref=Genbank:YP_008637706.1,GeneID:17152846;gbkey=CDS;gene=pdxA;product=probable 4-hydroxythreonine-4-phosphate dehydrogenase;protein_id=YP_008637706.1;transl_table=11 probable 4-hydroxythreonine-4-phosphate dehydrogenase (1007737-1008708 -)	silent gcg -> gcA;	1138 1420 1646 1680 1811 220 301 3035 XCP123
NC_022541.1	1007908	c	c	c	T	c	c	T	c	c	T	c	T	c	T	c	T	c	T	T	c	c	c	c	c	c	c	T	cds811;Name=YP_008637706.1;Parent=gene867;Dbxref=Genbank:YP_008637706.1,GeneID:17152846;gbkey=CDS;gene=pdxA;product=probable 4-hydroxythreonine-4-phosphate dehydrogenase;protein_id=YP_008637706.1;transl_table=11 probable 4-hydroxythreonine-4-phosphate dehydrogenase (1007737-1008708 -)	silent gtg -> gtA;	1138 1420 1646 1680 1811 220 301 3035 XCP123
NC_022541.1	1007923	a	a	a	G	a	a	G	a	a	G	a	G	G	G	G	G	a	G	G	a	a	G	G	a	a	a	G	cds811;Name=YP_008637706.1;Parent=gene867;Dbxref=Genbank:YP_008637706.1,GeneID:17152846;gbkey=CDS;gene=pdxA;product=probable 4-hydroxythreonine-4-phosphate dehydrogenase;protein_id=YP_008637706.1;transl_table=11 probable 4-hydroxythreonine-4-phosphate dehydrogenase (1007737-1008708 -)	silent gat -> gaC;	1138 1420 1646 1680 1713 1811 2064 220 301 3035 556 557 XCP123
NC_022541.1	1007944	c	c	c	T	c	c	T	c	c	T	c	T	c	T	c	T	c	T	T	c	c	c	c	c	c	c	T	cds811;Name=YP_008637706.1;Parent=gene867;Dbxref=Genbank:YP_008637706.1,GeneID:17152846;gbkey=CDS;gene=pdxA;product=probable 4-hydroxythreonine-4-phosphate dehydrogenase;protein_id=YP_008637706.1;transl_table=11 probable 4-hydroxythreonine-4-phosphate dehydrogenase (1007737-1008708 -)	silent gcg -> gcA;	1138 1420 1646 1680 1811 220 301 3035 XCP123
NC_022541.1	1007973	a	a	a	G	a	a	G	a	a	G	a	G	a	G	a	G	a	G	G	a	a	a	a	a	a	a	G	cds811;Name=YP_008637706.1;Parent=gene867;Dbxref=Genbank:YP_008637706.1,GeneID:17152846;gbkey=CDS;gene=pdxA;product=probable 4-hydroxythreonine-4-phosphate dehydrogenase;protein_id=YP_008637706.1;transl_table=11 probable 4-hydroxythreonine-4-phosphate dehydrogenase (1007737-1008708 -)	silent ttg -> Ctg;	1138 1420 1646 1680 1811 220 301 3035 XCP123
NC_022541.1	1007977	g	g	g	T	g	g	T	g	g	T	g	T	g	T	g	T	g	T	T	g	g	g	g	g	g	g	T	cds811;Name=YP_008637706.1;Parent=gene867;Dbxref=Genbank:YP_008637706.1,GeneID:17152846;gbkey=CDS;gene=pdxA;product=probable 4-hydroxythreonine-4-phosphate dehydrogenase;protein_id=YP_008637706.1;transl_table=11 probable 4-hydroxythreonine-4-phosphate dehydrogenase (1007737-1008708 -)	silent gcc -> gcA;	1138 1420 1646 1680 1811 220 301 3035 XCP123
NC_022541.1	1007994	g	g	g	A	g	g	A	g	g	A	g	A	g	A	g	A	g	A	A	g	g	g	g	g	g	g	A	cds811;Name=YP_008637706.1;Parent=gene867;Dbxref=Genbank:YP_008637706.1,GeneID:17152846;gbkey=CDS;gene=pdxA;product=probable 4-hydroxythreonine-4-phosphate dehydrogenase;protein_id=YP_008637706.1;transl_table=11 probable 4-hydroxythreonine-4-phosphate dehydrogenase (1007737-1008708 -)	silent ctg -> Ttg;	1138 1420 1646 1680 1811 220 301 3035 XCP123
NC_022541.1	1008018	g	g	g	C	g	g	C	g	g	C	g	C	C	C	C	C	g	C	C	g	g	C	C	g	g	g	C	cds811;Name=YP_008637706.1;Parent=gene867;Dbxref=Genbank:YP_008637706.1,GeneID:17152846;gbkey=CDS;gene=pdxA;product=probable 4-hydroxythreonine-4-phosphate dehydrogenase;protein_id=YP_008637706.1;transl_table=11 probable 4-hydroxythreonine-4-phosphate dehydrogenase (1007737-1008708 -)	non-silent cag -> Gag;	1138 1420 1646 1680 1713 1811 2064 220 301 3035 556 557 XCP123
NC_022541.1	1008019	c	c	c	G	c	c	G	c	c	G	c	G	G	G	G	G	c	G	G	c	c	G	G	c	c	c	G	cds811;Name=YP_008637706.1;Parent=gene867;Dbxref=Genbank:YP_008637706.1,GeneID:17152846;gbkey=CDS;gene=pdxA;product=probable 4-hydroxythreonine-4-phosphate dehydrogenase;protein_id=YP_008637706.1;transl_table=11 probable 4-hydroxythreonine-4-phosphate dehydrogenase (1007737-1008708 -)	silent ggg -> ggC;	1138 1420 1646 1680 1713 1811 2064 220 301 3035 556 557 XCP123
NC_022541.1	100802	c	c	c	G	c	c	G	c	c	G	c	G	c	G	c	G	c	G	G	c	c	c	c	c	c	c	G	cds81;Name=YP_008636976.1;Parent=gene84;Dbxref=Genbank:YP_008636976.1,GeneID:17152343;gbkey=CDS;gene=kduI;product=5-keto 4-deoxyuronate isomerase%2C probable;protein_id=YP_008636976.1;transl_table=11 5-keto 4-deoxyuronate isomerase%2C probable (100259-101113 -)	silent ctg -> ctC;	1138 1420 1646 1680 1811 220 301 3035 XCP123
NC_022541.1	1008028	c	c	c	c	c	c	c	c	c	c	c	c	T	c	T	c	c	c	c	c	c	T	T	c	c	c	c	cds811;Name=YP_008637706.1;Parent=gene867;Dbxref=Genbank:YP_008637706.1,GeneID:17152846;gbkey=CDS;gene=pdxA;product=probable 4-hydroxythreonine-4-phosphate dehydrogenase;protein_id=YP_008637706.1;transl_table=11 probable 4-hydroxythreonine-4-phosphate dehydrogenase (1007737-1008708 -)	silent cag -> caA;	1713 2064 556 557
NC_022541.1	1008038	g	g	g	A	g	g	A	g	g	A	g	A	g	A	g	A	g	A	A	g	g	g	g	g	g	g	A	cds811;Name=YP_008637706.1;Parent=gene867;Dbxref=Genbank:YP_008637706.1,GeneID:17152846;gbkey=CDS;gene=pdxA;product=probable 4-hydroxythreonine-4-phosphate dehydrogenase;protein_id=YP_008637706.1;transl_table=11 probable 4-hydroxythreonine-4-phosphate dehydrogenase (1007737-1008708 -)	non-silent gcg -> gTg;	1138 1420 1646 1680 1811 220 301 3035 XCP123
NC_022541.1	1008039	c	c	c	G	c	c	G	c	c	G	c	G	c	G	c	G	c	G	G	c	c	c	c	c	c	c	G	cds811;Name=YP_008637706.1;Parent=gene867;Dbxref=Genbank:YP_008637706.1,GeneID:17152846;gbkey=CDS;gene=pdxA;product=probable 4-hydroxythreonine-4-phosphate dehydrogenase;protein_id=YP_008637706.1;transl_table=11 probable 4-hydroxythreonine-4-phosphate dehydrogenase (1007737-1008708 -)	non-silent gcg -> Ccg;	1138 1420 1646 1680 1811 220 301 3035 XCP123
NC_022541.1	100814	g	g	g	A	g	g	A	g	g	A	g	A	g	A	g	A	g	A	A	g	g	g	g	g	g	g	A	cds81;Name=YP_008636976.1;Parent=gene84;Dbxref=Genbank:YP_008636976.1,GeneID:17152343;gbkey=CDS;gene=kduI;product=5-keto 4-deoxyuronate isomerase%2C probable;protein_id=YP_008636976.1;transl_table=11 5-keto 4-deoxyuronate isomerase%2C probable (100259-101113 -)	silent acc -> acT;	1138 1420 1646 1680 1811 220 301 3035 XCP123
NC_022541.1	1008157	a	a	a	G	a	a	G	a	a	G	a	G	a	G	a	G	a	G	G	a	a	a	a	a	a	a	G	cds811;Name=YP_008637706.1;Parent=gene867;Dbxref=Genbank:YP_008637706.1,GeneID:17152846;gbkey=CDS;gene=pdxA;product=probable 4-hydroxythreonine-4-phosphate dehydrogenase;protein_id=YP_008637706.1;transl_table=11 probable 4-hydroxythreonine-4-phosphate dehydrogenase (1007737-1008708 -)	silent cat -> caC;	1138 1420 1646 1680 1811 220 301 3035 XCP123
NC_022541.1	100817	g	g	g	A	g	g	A	g	g	A	g	A	g	A	g	A	g	A	A	g	g	g	g	g	g	g	A	cds81;Name=YP_008636976.1;Parent=gene84;Dbxref=Genbank:YP_008636976.1,GeneID:17152343;gbkey=CDS;gene=kduI;product=5-keto 4-deoxyuronate isomerase%2C probable;protein_id=YP_008636976.1;transl_table=11 5-keto 4-deoxyuronate isomerase%2C probable (100259-101113 -)	silent ggc -> ggT;	1138 1420 1646 1680 1811 220 301 3035 XCP123
NC_022541.1	1008172	a	a	a	G	a	a	G	a	a	G	a	G	a	G	a	G	a	G	G	a	a	a	a	a	a	a	G	cds811;Name=YP_008637706.1;Parent=gene867;Dbxref=Genbank:YP_008637706.1,GeneID:17152846;gbkey=CDS;gene=pdxA;product=probable 4-hydroxythreonine-4-phosphate dehydrogenase;protein_id=YP_008637706.1;transl_table=11 probable 4-hydroxythreonine-4-phosphate dehydrogenase (1007737-1008708 -)	silent tgt -> tgC;	1138 1420 1646 1680 1811 220 301 3035 XCP123
NC_022541.1	1008179	c	c	c	A	c	c	A	c	c	A	c	A	A	A	A	A	c	A	A	c	c	A	A	c	c	c	A	cds811;Name=YP_008637706.1;Parent=gene867;Dbxref=Genbank:YP_008637706.1,GeneID:17152846;gbkey=CDS;gene=pdxA;product=probable 4-hydroxythreonine-4-phosphate dehydrogenase;protein_id=YP_008637706.1;transl_table=11 probable 4-hydroxythreonine-4-phosphate dehydrogenase (1007737-1008708 -)	non-silent cgg -> cTg;	1138 1420 1646 1680 1713 1811 2064 220 301 3035 556 557 XCP123
NC_022541.1	1008184	g	g	g	C	g	g	C	g	g	C	g	C	g	C	g	C	g	C	C	g	g	g	g	g	g	g	C	cds811;Name=YP_008637706.1;Parent=gene867;Dbxref=Genbank:YP_008637706.1,GeneID:17152846;gbkey=CDS;gene=pdxA;product=probable 4-hydroxythreonine-4-phosphate dehydrogenase;protein_id=YP_008637706.1;transl_table=11 probable 4-hydroxythreonine-4-phosphate dehydrogenase (1007737-1008708 -)	silent gcc -> gcG;	1138 1420 1646 1680 1811 220 301 3035 XCP123
NC_022541.1	1008199	c	c	c	G	c	c	G	c	c	G	c	G	c	G	c	G	c	G	G	c	c	c	c	c	c	c	G	cds811;Name=YP_008637706.1;Parent=gene867;Dbxref=Genbank:YP_008637706.1,GeneID:17152846;gbkey=CDS;gene=pdxA;product=probable 4-hydroxythreonine-4-phosphate dehydrogenase;protein_id=YP_008637706.1;transl_table=11 probable 4-hydroxythreonine-4-phosphate dehydrogenase (1007737-1008708 -)	silent gcg -> gcC;	1138 1420 1646 1680 1811 220 301 3035 XCP123
NC_022541.1	1008232	t	t	t	C	t	t	C	t	t	C	t	C	C	C	C	C	t	C	C	t	t	C	C	t	t	t	C	cds811;Name=YP_008637706.1;Parent=gene867;Dbxref=Genbank:YP_008637706.1,GeneID:17152846;gbkey=CDS;gene=pdxA;product=probable 4-hydroxythreonine-4-phosphate dehydrogenase;protein_id=YP_008637706.1;transl_table=11 probable 4-hydroxythreonine-4-phosphate dehydrogenase (1007737-1008708 -)	silent aca -> acG;	1138 1420 1646 1680 1713 1811 2064 220 301 3035 556 557 XCP123
NC_022541.1	1008267	g	g	g	A	g	g	A	g	g	A	g	A	g	A	g	A	g	A	A	g	g	g	g	g	g	g	A	cds811;Name=YP_008637706.1;Parent=gene867;Dbxref=Genbank:YP_008637706.1,GeneID:17152846;gbkey=CDS;gene=pdxA;product=probable 4-hydroxythreonine-4-phosphate dehydrogenase;protein_id=YP_008637706.1;transl_table=11 probable 4-hydroxythreonine-4-phosphate dehydrogenase (1007737-1008708 -)	silent ctg -> Ttg;	1138 1420 1646 1680 1811 220 301 3035 XCP123
NC_022541.1	100827	g	g	g	g	g	g	g	g	g	g	g	g	A	g	A	g	g	g	g	g	g	A	A	g	g	g	g	cds81;Name=YP_008636976.1;Parent=gene84;Dbxref=Genbank:YP_008636976.1,GeneID:17152343;gbkey=CDS;gene=kduI;product=5-keto 4-deoxyuronate isomerase%2C probable;protein_id=YP_008636976.1;transl_table=11 5-keto 4-deoxyuronate isomerase%2C probable (100259-101113 -)	non-silent acc -> aTc;	1713 2064 556 557
NC_022541.1	1008325	g	g	g	A	g	g	A	g	g	A	g	A	g	A	g	A	g	A	A	g	g	g	g	g	g	g	A	cds811;Name=YP_008637706.1;Parent=gene867;Dbxref=Genbank:YP_008637706.1,GeneID:17152846;gbkey=CDS;gene=pdxA;product=probable 4-hydroxythreonine-4-phosphate dehydrogenase;protein_id=YP_008637706.1;transl_table=11 probable 4-hydroxythreonine-4-phosphate dehydrogenase (1007737-1008708 -)	silent gcc -> gcT;	1138 1420 1646 1680 1811 220 301 3035 XCP123
NC_022541.1	1008331	c	c	c	G	c	c	G	c	c	G	c	G	G	G	G	G	c	G	G	c	c	G	G	c	c	c	G	cds811;Name=YP_008637706.1;Parent=gene867;Dbxref=Genbank:YP_008637706.1,GeneID:17152846;gbkey=CDS;gene=pdxA;product=probable 4-hydroxythreonine-4-phosphate dehydrogenase;protein_id=YP_008637706.1;transl_table=11 probable 4-hydroxythreonine-4-phosphate dehydrogenase (1007737-1008708 -)	silent ggg -> ggC;	1138 1420 1646 1680 1713 1811 2064 220 301 3035 556 557 XCP123
NC_022541.1	1008340	g	g	g	A	g	g	A	g	g	A	g	A	g	A	g	A	g	A	A	g	g	g	g	g	g	g	A	cds811;Name=YP_008637706.1;Parent=gene867;Dbxref=Genbank:YP_008637706.1,GeneID:17152846;gbkey=CDS;gene=pdxA;product=probable 4-hydroxythreonine-4-phosphate dehydrogenase;protein_id=YP_008637706.1;transl_table=11 probable 4-hydroxythreonine-4-phosphate dehydrogenase (1007737-1008708 -)	silent aac -> aaT;	1138 1420 1646 1680 1811 220 301 3035 XCP123
NC_022541.1	1008347	g	g	g	A	g	g	A	g	g	A	g	A	g	A	g	A	g	A	A	g	g	g	g	g	g	g	A	cds811;Name=YP_008637706.1;Parent=gene867;Dbxref=Genbank:YP_008637706.1,GeneID:17152846;gbkey=CDS;gene=pdxA;product=probable 4-hydroxythreonine-4-phosphate dehydrogenase;protein_id=YP_008637706.1;transl_table=11 probable 4-hydroxythreonine-4-phosphate dehydrogenase (1007737-1008708 -)	non-silent gcg -> gTg;	1138 1420 1646 1680 1811 220 301 3035 XCP123
NC_022541.1	100835	g	g	g	C	g	g	C	g	g	C	g	C	g	C	g	C	g	C	C	g	g	g	g	g	g	g	C	cds81;Name=YP_008636976.1;Parent=gene84;Dbxref=Genbank:YP_008636976.1,GeneID:17152343;gbkey=CDS;gene=kduI;product=5-keto 4-deoxyuronate isomerase%2C probable;protein_id=YP_008636976.1;transl_table=11 5-keto 4-deoxyuronate isomerase%2C probable (100259-101113 -)	silent ggc -> ggG;	1138 1420 1646 1680 1811 220 301 3035 XCP123
NC_022541.1	1008384	g	g	g	A	g	g	A	g	g	A	g	A	g	A	g	A	g	A	A	g	g	g	g	g	g	g	A	cds811;Name=YP_008637706.1;Parent=gene867;Dbxref=Genbank:YP_008637706.1,GeneID:17152846;gbkey=CDS;gene=pdxA;product=probable 4-hydroxythreonine-4-phosphate dehydrogenase;protein_id=YP_008637706.1;transl_table=11 probable 4-hydroxythreonine-4-phosphate dehydrogenase (1007737-1008708 -)	silent ctg -> Ttg;	1138 1420 1646 1680 1811 220 301 3035 XCP123
NC_022541.1	1008385	g	g	g	C	g	g	C	g	g	C	g	C	g	C	g	C	g	C	C	g	g	g	g	g	g	g	C	cds811;Name=YP_008637706.1;Parent=gene867;Dbxref=Genbank:YP_008637706.1,GeneID:17152846;gbkey=CDS;gene=pdxA;product=probable 4-hydroxythreonine-4-phosphate dehydrogenase;protein_id=YP_008637706.1;transl_table=11 probable 4-hydroxythreonine-4-phosphate dehydrogenase (1007737-1008708 -)	silent cgc -> cgG;	1138 1420 1646 1680 1811 220 301 3035 XCP123
NC_022541.1	1008404	g	g	g	C	g	g	C	g	g	C	g	C	g	C	g	C	g	C	C	g	g	g	g	g	g	g	C	cds811;Name=YP_008637706.1;Parent=gene867;Dbxref=Genbank:YP_008637706.1,GeneID:17152846;gbkey=CDS;gene=pdxA;product=probable 4-hydroxythreonine-4-phosphate dehydrogenase;protein_id=YP_008637706.1;transl_table=11 probable 4-hydroxythreonine-4-phosphate dehydrogenase (1007737-1008708 -)	non-silent gcc -> gGc;	1138 1420 1646 1680 1811 220 301 3035 XCP123
NC_022541.1	1008448	t	t	t	C	t	t	C	t	t	C	t	C	t	C	t	C	t	C	C	t	t	t	t	t	t	t	C	cds811;Name=YP_008637706.1;Parent=gene867;Dbxref=Genbank:YP_008637706.1,GeneID:17152846;gbkey=CDS;gene=pdxA;product=probable 4-hydroxythreonine-4-phosphate dehydrogenase;protein_id=YP_008637706.1;transl_table=11 probable 4-hydroxythreonine-4-phosphate dehydrogenase (1007737-1008708 -)	silent cca -> ccG;	1138 1420 1646 1680 1811 220 301 3035 XCP123
NC_022541.1	1008458	a	a	a	G	a	a	G	a	a	G	a	G	G	G	G	G	a	G	G	a	a	G	G	a	a	a	G	cds811;Name=YP_008637706.1;Parent=gene867;Dbxref=Genbank:YP_008637706.1,GeneID:17152846;gbkey=CDS;gene=pdxA;product=probable 4-hydroxythreonine-4-phosphate dehydrogenase;protein_id=YP_008637706.1;transl_table=11 probable 4-hydroxythreonine-4-phosphate dehydrogenase (1007737-1008708 -)	non-silent gta -> gCa;	1138 1420 1646 1680 1713 1811 2064 220 301 3035 556 557 XCP123
NC_022541.1	1008511	g	g	g	A	g	g	A	g	g	A	g	A	g	A	g	A	g	A	A	g	g	g	g	g	g	g	A	cds811;Name=YP_008637706.1;Parent=gene867;Dbxref=Genbank:YP_008637706.1,GeneID:17152846;gbkey=CDS;gene=pdxA;product=probable 4-hydroxythreonine-4-phosphate dehydrogenase;protein_id=YP_008637706.1;transl_table=11 probable 4-hydroxythreonine-4-phosphate dehydrogenase (1007737-1008708 -)	silent ccc -> ccT;	1138 1420 1646 1680 1811 220 301 3035 XCP123
NC_022541.1	1008520	t	t	t	C	t	t	C	t	t	C	t	C	t	C	t	C	t	C	C	t	t	t	t	t	t	t	C	cds811;Name=YP_008637706.1;Parent=gene867;Dbxref=Genbank:YP_008637706.1,GeneID:17152846;gbkey=CDS;gene=pdxA;product=probable 4-hydroxythreonine-4-phosphate dehydrogenase;protein_id=YP_008637706.1;transl_table=11 probable 4-hydroxythreonine-4-phosphate dehydrogenase (1007737-1008708 -)	silent gca -> gcG;	1138 1420 1646 1680 1811 220 301 3035 XCP123
NC_022541.1	1008552	g	g	g	A	g	g	A	g	g	A	g	A	g	A	g	A	g	A	A	g	g	g	g	g	g	g	A	cds811;Name=YP_008637706.1;Parent=gene867;Dbxref=Genbank:YP_008637706.1,GeneID:17152846;gbkey=CDS;gene=pdxA;product=probable 4-hydroxythreonine-4-phosphate dehydrogenase;protein_id=YP_008637706.1;transl_table=11 probable 4-hydroxythreonine-4-phosphate dehydrogenase (1007737-1008708 -)	non-silent cct -> Tct;	1138 1420 1646 1680 1811 220 301 3035 XCP123
NC_022541.1	1008619	c	c	c	A	c	c	A	c	c	A	c	A	c	A	c	A	c	A	A	c	c	c	c	c	c	c	A	cds811;Name=YP_008637706.1;Parent=gene867;Dbxref=Genbank:YP_008637706.1,GeneID:17152846;gbkey=CDS;gene=pdxA;product=probable 4-hydroxythreonine-4-phosphate dehydrogenase;protein_id=YP_008637706.1;transl_table=11 probable 4-hydroxythreonine-4-phosphate dehydrogenase (1007737-1008708 -)	silent tcg -> tcT;	1138 1420 1646 1680 1811 220 301 3035 XCP123
NC_022541.1	1008634	c	c	c	c	c	c	c	c	c	c	c	c	G	c	G	c	c	c	c	c	c	G	G	c	c	c	c	cds811;Name=YP_008637706.1;Parent=gene867;Dbxref=Genbank:YP_008637706.1,GeneID:17152846;gbkey=CDS;gene=pdxA;product=probable 4-hydroxythreonine-4-phosphate dehydrogenase;protein_id=YP_008637706.1;transl_table=11 probable 4-hydroxythreonine-4-phosphate dehydrogenase (1007737-1008708 -)	silent gcg -> gcC;	1713 2064 556 557
NC_022541.1	1008637	a	a	a	G	a	a	G	a	a	G	a	G	a	G	a	G	a	G	G	a	a	a	a	a	a	a	G	cds811;Name=YP_008637706.1;Parent=gene867;Dbxref=Genbank:YP_008637706.1,GeneID:17152846;gbkey=CDS;gene=pdxA;product=probable 4-hydroxythreonine-4-phosphate dehydrogenase;protein_id=YP_008637706.1;transl_table=11 probable 4-hydroxythreonine-4-phosphate dehydrogenase (1007737-1008708 -)	silent ctt -> ctC;	1138 1420 1646 1680 1811 220 301 3035 XCP123
NC_022541.1	1008649	t	t	t	G	t	t	G	t	t	G	t	G	G	G	G	G	t	G	G	t	t	G	G	t	t	t	G	cds811;Name=YP_008637706.1;Parent=gene867;Dbxref=Genbank:YP_008637706.1,GeneID:17152846;gbkey=CDS;gene=pdxA;product=probable 4-hydroxythreonine-4-phosphate dehydrogenase;protein_id=YP_008637706.1;transl_table=11 probable 4-hydroxythreonine-4-phosphate dehydrogenase (1007737-1008708 -)	silent cta -> ctC;	1138 1420 1646 1680 1713 1811 2064 220 301 3035 556 557 XCP123
NC_022541.1	1008652	c	c	c	T	c	c	T	c	c	T	c	T	T	T	T	T	c	T	T	c	c	T	T	c	c	c	T	cds811;Name=YP_008637706.1;Parent=gene867;Dbxref=Genbank:YP_008637706.1,GeneID:17152846;gbkey=CDS;gene=pdxA;product=probable 4-hydroxythreonine-4-phosphate dehydrogenase;protein_id=YP_008637706.1;transl_table=11 probable 4-hydroxythreonine-4-phosphate dehydrogenase (1007737-1008708 -)	silent gag -> gaA;	1138 1420 1646 1680 1713 1811 2064 220 301 3035 556 557 XCP123
NC_022541.1	1008711	g	g	g	T	g	g	T	g	g	T	g	T	g	T	g	T	g	T	T	g	g	g	g	g	g	g	T			1138 1420 1646 1680 1811 220 301 3035 XCP123
NC_022541.1	1008718	a	a	a	C	a	a	C	a	a	C	a	C	a	C	a	C	a	C	C	a	a	a	a	a	a	a	C			1138 1420 1646 1680 1811 220 301 3035 XCP123
NC_022541.1	1008718	a	a	a	a	a	a	a	a	a	a	a	a	G	a	G	a	a	a	a	a	a	G	G	a	a	a	a			1713 2064 556 557
NC_022541.1	1008719	t	t	t	t	t	t	t	t	t	t	t	t	C	t	C	t	t	t	t	t	t	C	C	t	t	t	t			1713 2064 556 557
NC_022541.1	1008725	g	g	g	g	g	g	g	g	g	g	g	g	C	g	C	g	g	g	g	g	g	C	C	g	g	g	g			1713 2064 556 557
NC_022541.1	1008726	c	c	c	T	c	c	T	c	c	T	c	T	c	T	c	T	c	T	T	c	c	c	c	c	c	c	T			1138 1420 1646 1680 1811 220 301 3035 XCP123
NC_022541.1	1008756	a	a	a	G	a	a	G	a	a	G	a	G	G	G	G	G	a	G	G	a	a	G	G	a	a	a	G	cds812;Name=YP_008637707.1;Parent=gene868;Dbxref=Genbank:YP_008637707.1,GeneID:17152557;gbkey=CDS;gene=surA;product=putative peptidyl-prolyl cis-trans isomerase %28PPIase%29;protein_id=YP_008637707.1;transl_table=11 putative peptidyl-prolyl cis-trans isomerase %28PPIase%29 (1008728-1010119 -)	non-silent ttg -> tCg;	1138 1420 1646 1680 1713 1811 2064 220 301 3035 556 557 XCP123
NC_022541.1	1008767	a	a	a	C	a	a	C	a	a	C	a	C	a	C	a	C	a	C	C	a	a	a	a	a	a	a	C	cds812;Name=YP_008637707.1;Parent=gene868;Dbxref=Genbank:YP_008637707.1,GeneID:17152557;gbkey=CDS;gene=surA;product=putative peptidyl-prolyl cis-trans isomerase %28PPIase%29;protein_id=YP_008637707.1;transl_table=11 putative peptidyl-prolyl cis-trans isomerase %28PPIase%29 (1008728-1010119 -)	silent cct -> ccG;	1138 1420 1646 1680 1811 220 301 3035 XCP123
NC_022541.1	1008770	g	g	g	A	g	g	A	g	g	A	g	A	g	A	g	A	g	A	A	g	g	g	g	g	g	g	A	cds812;Name=YP_008637707.1;Parent=gene868;Dbxref=Genbank:YP_008637707.1,GeneID:17152557;gbkey=CDS;gene=surA;product=putative peptidyl-prolyl cis-trans isomerase %28PPIase%29;protein_id=YP_008637707.1;transl_table=11 putative peptidyl-prolyl cis-trans isomerase %28PPIase%29 (1008728-1010119 -)	silent gac -> gaT;	1138 1420 1646 1680 1811 220 301 3035 XCP123
NC_022541.1	1008775	c	c	c	c	c	c	c	c	c	c	c	c	G	c	G	c	c	c	c	c	c	G	G	c	c	c	c	cds812;Name=YP_008637707.1;Parent=gene868;Dbxref=Genbank:YP_008637707.1,GeneID:17152557;gbkey=CDS;gene=surA;product=putative peptidyl-prolyl cis-trans isomerase %28PPIase%29;protein_id=YP_008637707.1;transl_table=11 putative peptidyl-prolyl cis-trans isomerase %28PPIase%29 (1008728-1010119 -)	non-silent gca -> Cca;	1713 2064 556 557
NC_022541.1	1008797	a	a	a	G	a	a	G	a	a	G	a	G	G	G	G	G	a	G	G	a	a	G	G	a	a	a	G	cds812;Name=YP_008637707.1;Parent=gene868;Dbxref=Genbank:YP_008637707.1,GeneID:17152557;gbkey=CDS;gene=surA;product=putative peptidyl-prolyl cis-trans isomerase %28PPIase%29;protein_id=YP_008637707.1;transl_table=11 putative peptidyl-prolyl cis-trans isomerase %28PPIase%29 (1008728-1010119 -)	silent gct -> gcC;	1138 1420 1646 1680 1713 1811 2064 220 301 3035 556 557 XCP123
NC_022541.1	1008800	g	g	g	A	g	g	A	g	g	A	g	A	g	A	g	A	g	A	A	g	g	g	g	g	g	g	A	cds812;Name=YP_008637707.1;Parent=gene868;Dbxref=Genbank:YP_008637707.1,GeneID:17152557;gbkey=CDS;gene=surA;product=putative peptidyl-prolyl cis-trans isomerase %28PPIase%29;protein_id=YP_008637707.1;transl_table=11 putative peptidyl-prolyl cis-trans isomerase %28PPIase%29 (1008728-1010119 -)	silent aac -> aaT;	1138 1420 1646 1680 1811 220 301 3035 XCP123
NC_022541.1	1008818	g	g	g	g	g	g	g	g	g	g	g	g	C	g	C	g	g	g	g	g	g	C	C	g	g	g	g	cds812;Name=YP_008637707.1;Parent=gene868;Dbxref=Genbank:YP_008637707.1,GeneID:17152557;gbkey=CDS;gene=surA;product=putative peptidyl-prolyl cis-trans isomerase %28PPIase%29;protein_id=YP_008637707.1;transl_table=11 putative peptidyl-prolyl cis-trans isomerase %28PPIase%29 (1008728-1010119 -)	silent ggc -> ggG;	1713 2064 556 557
NC_022541.1	1008854	t	t	t	C	t	t	C	t	t	C	t	C	t	C	t	C	t	C	C	t	t	t	t	t	t	t	C	cds812;Name=YP_008637707.1;Parent=gene868;Dbxref=Genbank:YP_008637707.1,GeneID:17152557;gbkey=CDS;gene=surA;product=putative peptidyl-prolyl cis-trans isomerase %28PPIase%29;protein_id=YP_008637707.1;transl_table=11 putative peptidyl-prolyl cis-trans isomerase %28PPIase%29 (1008728-1010119 -)	silent gaa -> gaG;	1138 1420 1646 1680 1811 220 301 3035 XCP123
NC_022541.1	1008875	t	t	t	C	t	t	C	t	t	C	t	C	C	C	C	C	t	C	C	t	t	C	C	t	t	t	C	cds812;Name=YP_008637707.1;Parent=gene868;Dbxref=Genbank:YP_008637707.1,GeneID:17152557;gbkey=CDS;gene=surA;product=putative peptidyl-prolyl cis-trans isomerase %28PPIase%29;protein_id=YP_008637707.1;transl_table=11 putative peptidyl-prolyl cis-trans isomerase %28PPIase%29 (1008728-1010119 -)	silent gaa -> gaG;	1138 1420 1646 1680 1713 1811 2064 220 301 3035 556 557 XCP123
NC_022541.1	100889	g	g	g	A	g	g	A	g	g	A	g	A	A	A	A	A	g	A	A	g	g	A	A	g	g	g	A	cds81;Name=YP_008636976.1;Parent=gene84;Dbxref=Genbank:YP_008636976.1,GeneID:17152343;gbkey=CDS;gene=kduI;product=5-keto 4-deoxyuronate isomerase%2C probable;protein_id=YP_008636976.1;transl_table=11 5-keto 4-deoxyuronate isomerase%2C probable (100259-101113 -)	silent cac -> caT;	1138 1420 1646 1680 1713 1811 2064 220 301 3035 556 557 XCP123
NC_022541.1	1008908	g	g	g	A	g	g	A	g	g	A	g	A	g	A	g	A	g	A	A	g	g	g	g	g	g	g	A	cds812;Name=YP_008637707.1;Parent=gene868;Dbxref=Genbank:YP_008637707.1,GeneID:17152557;gbkey=CDS;gene=surA;product=putative peptidyl-prolyl cis-trans isomerase %28PPIase%29;protein_id=YP_008637707.1;transl_table=11 putative peptidyl-prolyl cis-trans isomerase %28PPIase%29 (1008728-1010119 -)	silent cgc -> cgT;	1138 1420 1646 1680 1811 220 301 3035 XCP123
NC_022541.1	1008926	a	a	a	G	a	a	G	a	a	G	a	G	a	G	a	G	a	G	G	a	a	a	a	a	a	a	G	cds812;Name=YP_008637707.1;Parent=gene868;Dbxref=Genbank:YP_008637707.1,GeneID:17152557;gbkey=CDS;gene=surA;product=putative peptidyl-prolyl cis-trans isomerase %28PPIase%29;protein_id=YP_008637707.1;transl_table=11 putative peptidyl-prolyl cis-trans isomerase %28PPIase%29 (1008728-1010119 -)	silent aat -> aaC;	1138 1420 1646 1680 1811 220 301 3035 XCP123
NC_022541.1	1008938	g	g	g	C	g	g	C	g	g	C	g	C	g	C	g	C	g	C	C	g	g	g	g	g	g	g	C	cds812;Name=YP_008637707.1;Parent=gene868;Dbxref=Genbank:YP_008637707.1,GeneID:17152557;gbkey=CDS;gene=surA;product=putative peptidyl-prolyl cis-trans isomerase %28PPIase%29;protein_id=YP_008637707.1;transl_table=11 putative peptidyl-prolyl cis-trans isomerase %28PPIase%29 (1008728-1010119 -)	silent gtc -> gtG;	1138 1420 1646 1680 1811 220 301 3035 XCP123
NC_022541.1	1008950	g	g	g	A	g	g	A	g	g	A	g	A	g	A	g	A	g	A	A	g	g	g	g	g	g	g	A	cds812;Name=YP_008637707.1;Parent=gene868;Dbxref=Genbank:YP_008637707.1,GeneID:17152557;gbkey=CDS;gene=surA;product=putative peptidyl-prolyl cis-trans isomerase %28PPIase%29;protein_id=YP_008637707.1;transl_table=11 putative peptidyl-prolyl cis-trans isomerase %28PPIase%29 (1008728-1010119 -)	silent cgc -> cgT;	1138 1420 1646 1680 1811 220 301 3035 XCP123
NC_022541.1	1009001	c	c	c	T	c	c	T	c	c	T	c	T	c	T	c	T	c	T	T	c	c	c	c	c	c	c	T	cds812;Name=YP_008637707.1;Parent=gene868;Dbxref=Genbank:YP_008637707.1,GeneID:17152557;gbkey=CDS;gene=surA;product=putative peptidyl-prolyl cis-trans isomerase %28PPIase%29;protein_id=YP_008637707.1;transl_table=11 putative peptidyl-prolyl cis-trans isomerase %28PPIase%29 (1008728-1010119 -)	silent gag -> gaA;	1138 1420 1646 1680 1811 220 301 3035 XCP123
NC_022541.1	1009016	g	g	g	A	g	g	A	g	g	A	g	A	g	A	g	A	g	A	A	g	g	g	g	g	g	g	A	cds812;Name=YP_008637707.1;Parent=gene868;Dbxref=Genbank:YP_008637707.1,GeneID:17152557;gbkey=CDS;gene=surA;product=putative peptidyl-prolyl cis-trans isomerase %28PPIase%29;protein_id=YP_008637707.1;transl_table=11 putative peptidyl-prolyl cis-trans isomerase %28PPIase%29 (1008728-1010119 -)	silent gac -> gaT;	1138 1420 1646 1680 1811 220 301 3035 XCP123
NC_022541.1	100904	c	c	c	c	c	c	c	c	c	c	c	c	G	c	G	c	c	c	c	c	c	G	G	c	c	c	c	cds81;Name=YP_008636976.1;Parent=gene84;Dbxref=Genbank:YP_008636976.1,GeneID:17152343;gbkey=CDS;gene=kduI;product=5-keto 4-deoxyuronate isomerase%2C probable;protein_id=YP_008636976.1;transl_table=11 5-keto 4-deoxyuronate isomerase%2C probable (100259-101113 -)	silent gcg -> gcC;	1713 2064 556 557
NC_022541.1	100904	c	c	c	T	c	c	T	c	c	T	c	T	c	T	c	T	c	T	T	c	c	c	c	c	c	c	T	cds81;Name=YP_008636976.1;Parent=gene84;Dbxref=Genbank:YP_008636976.1,GeneID:17152343;gbkey=CDS;gene=kduI;product=5-keto 4-deoxyuronate isomerase%2C probable;protein_id=YP_008636976.1;transl_table=11 5-keto 4-deoxyuronate isomerase%2C probable (100259-101113 -)	silent gcg -> gcA;	1138 1420 1646 1680 1811 220 301 3035 XCP123
NC_022541.1	1009055	a	G	G	G	a	G	G	a	G	G	a	G	G	G	G	G	a	G	G	G	G	G	G	G	G	G	G	cds812;Name=YP_008637707.1;Parent=gene868;Dbxref=Genbank:YP_008637707.1,GeneID:17152557;gbkey=CDS;gene=surA;product=putative peptidyl-prolyl cis-trans isomerase %28PPIase%29;protein_id=YP_008637707.1;transl_table=11 putative peptidyl-prolyl cis-trans isomerase %28PPIase%29 (1008728-1010119 -)	silent ttt -> ttC;	1056 1058 1138 1402 1420 1495 1646 1680 1713 1811 2064 220 301 3035 3660 381 556 557 670 X621 X631 XCP123
NC_022541.1	1009058	c	c	c	T	c	c	T	c	c	T	c	T	c	T	c	T	c	T	T	c	c	c	c	c	c	c	T	cds812;Name=YP_008637707.1;Parent=gene868;Dbxref=Genbank:YP_008637707.1,GeneID:17152557;gbkey=CDS;gene=surA;product=putative peptidyl-prolyl cis-trans isomerase %28PPIase%29;protein_id=YP_008637707.1;transl_table=11 putative peptidyl-prolyl cis-trans isomerase %28PPIase%29 (1008728-1010119 -)	silent gcg -> gcA;	1138 1420 1646 1680 1811 220 301 3035 XCP123
NC_022541.1	1009061	a	a	a	G	a	a	G	a	a	G	a	G	a	G	a	G	a	G	G	a	a	a	a	a	a	a	G	cds812;Name=YP_008637707.1;Parent=gene868;Dbxref=Genbank:YP_008637707.1,GeneID:17152557;gbkey=CDS;gene=surA;product=putative peptidyl-prolyl cis-trans isomerase %28PPIase%29;protein_id=YP_008637707.1;transl_table=11 putative peptidyl-prolyl cis-trans isomerase %28PPIase%29 (1008728-1010119 -)	silent gat -> gaC;	1138 1420 1646 1680 1811 220 301 3035 XCP123
NC_022541.1	1009061	a	a	a	a	a	a	a	a	a	a	a	a	T	a	T	a	a	a	a	a	a	T	T	a	a	a	a	cds812;Name=YP_008637707.1;Parent=gene868;Dbxref=Genbank:YP_008637707.1,GeneID:17152557;gbkey=CDS;gene=surA;product=putative peptidyl-prolyl cis-trans isomerase %28PPIase%29;protein_id=YP_008637707.1;transl_table=11 putative peptidyl-prolyl cis-trans isomerase %28PPIase%29 (1008728-1010119 -)	non-silent gat -> gaA;	1713 2064 556 557
NC_022541.1	100907	c	c	c	c	c	c	c	c	c	c	c	c	G	c	G	c	c	c	c	c	c	G	G	c	c	c	c	cds81;Name=YP_008636976.1;Parent=gene84;Dbxref=Genbank:YP_008636976.1,GeneID:17152343;gbkey=CDS;gene=kduI;product=5-keto 4-deoxyuronate isomerase%2C probable;protein_id=YP_008636976.1;transl_table=11 5-keto 4-deoxyuronate isomerase%2C probable (100259-101113 -)	silent ccg -> ccC;	1713 2064 556 557
NC_022541.1	1009079	c	c	c	T	c	c	T	c	c	T	c	T	c	T	c	T	c	T	T	c	c	c	c	c	c	c	T	cds812;Name=YP_008637707.1;Parent=gene868;Dbxref=Genbank:YP_008637707.1,GeneID:17152557;gbkey=CDS;gene=surA;product=putative peptidyl-prolyl cis-trans isomerase %28PPIase%29;protein_id=YP_008637707.1;transl_table=11 putative peptidyl-prolyl cis-trans isomerase %28PPIase%29 (1008728-1010119 -)	silent ctg -> ctA;	1138 1420 1646 1680 1811 220 301 3035 XCP123
NC_022541.1	1009103	g	g	g	A	g	g	A	g	g	A	g	A	g	A	g	A	g	A	A	g	g	g	g	g	g	g	A	cds812;Name=YP_008637707.1;Parent=gene868;Dbxref=Genbank:YP_008637707.1,GeneID:17152557;gbkey=CDS;gene=surA;product=putative peptidyl-prolyl cis-trans isomerase %28PPIase%29;protein_id=YP_008637707.1;transl_table=11 putative peptidyl-prolyl cis-trans isomerase %28PPIase%29 (1008728-1010119 -)	silent aac -> aaT;	1138 1420 1646 1680 1811 220 301 3035 XCP123
NC_022541.1	1009115	t	t	t	G	t	t	G	t	t	G	t	G	t	G	t	G	t	G	G	t	t	t	t	t	t	t	G	cds812;Name=YP_008637707.1;Parent=gene868;Dbxref=Genbank:YP_008637707.1,GeneID:17152557;gbkey=CDS;gene=surA;product=putative peptidyl-prolyl cis-trans isomerase %28PPIase%29;protein_id=YP_008637707.1;transl_table=11 putative peptidyl-prolyl cis-trans isomerase %28PPIase%29 (1008728-1010119 -)	silent tca -> tcC;	1138 1420 1646 1680 1811 220 301 3035 XCP123
NC_022541.1	1009148	g	g	g	A	g	g	A	g	g	A	g	A	g	A	g	A	g	A	A	g	g	g	g	g	g	g	A	cds812;Name=YP_008637707.1;Parent=gene868;Dbxref=Genbank:YP_008637707.1,GeneID:17152557;gbkey=CDS;gene=surA;product=putative peptidyl-prolyl cis-trans isomerase %28PPIase%29;protein_id=YP_008637707.1;transl_table=11 putative peptidyl-prolyl cis-trans isomerase %28PPIase%29 (1008728-1010119 -)	silent ggc -> ggT;	1138 1420 1646 1680 1811 220 301 3035 XCP123
NC_022541.1	1009151	a	a	a	G	a	a	G	a	a	G	a	G	a	G	a	G	a	G	G	a	a	a	a	a	a	a	G	cds812;Name=YP_008637707.1;Parent=gene868;Dbxref=Genbank:YP_008637707.1,GeneID:17152557;gbkey=CDS;gene=surA;product=putative peptidyl-prolyl cis-trans isomerase %28PPIase%29;protein_id=YP_008637707.1;transl_table=11 putative peptidyl-prolyl cis-trans isomerase %28PPIase%29 (1008728-1010119 -)	silent ggt -> ggC;	1138 1420 1646 1680 1811 220 301 3035 XCP123
NC_022541.1	1009154	g	g	g	C	g	g	C	g	g	C	g	C	g	C	g	C	g	C	C	g	g	g	g	g	g	g	C	cds812;Name=YP_008637707.1;Parent=gene868;Dbxref=Genbank:YP_008637707.1,GeneID:17152557;gbkey=CDS;gene=surA;product=putative peptidyl-prolyl cis-trans isomerase %28PPIase%29;protein_id=YP_008637707.1;transl_table=11 putative peptidyl-prolyl cis-trans isomerase %28PPIase%29 (1008728-1010119 -)	silent gtc -> gtG;	1138 1420 1646 1680 1811 220 301 3035 XCP123
NC_022541.1	100920	c	c	c	T	c	c	T	c	c	T	c	T	c	T	c	T	c	T	T	c	c	c	c	c	c	c	T	cds81;Name=YP_008636976.1;Parent=gene84;Dbxref=Genbank:YP_008636976.1,GeneID:17152343;gbkey=CDS;gene=kduI;product=5-keto 4-deoxyuronate isomerase%2C probable;protein_id=YP_008636976.1;transl_table=11 5-keto 4-deoxyuronate isomerase%2C probable (100259-101113 -)	non-silent aga -> aAa;	1138 1420 1646 1680 1811 220 301 3035 XCP123
NC_022541.1	1009244	a	a	a	G	a	a	G	a	a	G	a	G	G	G	G	G	a	G	G	a	a	G	G	a	a	a	G	cds812;Name=YP_008637707.1;Parent=gene868;Dbxref=Genbank:YP_008637707.1,GeneID:17152557;gbkey=CDS;gene=surA;product=putative peptidyl-prolyl cis-trans isomerase %28PPIase%29;protein_id=YP_008637707.1;transl_table=11 putative peptidyl-prolyl cis-trans isomerase %28PPIase%29 (1008728-1010119 -)	silent tat -> taC;	1138 1420 1646 1680 1713 1811 2064 220 301 3035 556 557 XCP123
NC_022541.1	10093	a	a	a	a	a	a	a	a	a	a	a	a	G	a	G	a	a	a	a	a	a	G	G	a	a	a	a	cds6;Name=YP_008636901.1;Parent=gene6;Dbxref=Genbank:YP_008636901.1,GeneID:17148936;gbkey=CDS;product=hypothetical protein;protein_id=YP_008636901.1;transl_table=11 hypothetical protein (9578-10771 +)	silent gaa -> gaG;	1713 2064 556 557
NC_022541.1	1009301	c	c	c	T	c	c	T	c	c	T	c	T	c	T	c	T	c	T	T	c	c	c	c	c	c	c	T	cds812;Name=YP_008637707.1;Parent=gene868;Dbxref=Genbank:YP_008637707.1,GeneID:17152557;gbkey=CDS;gene=surA;product=putative peptidyl-prolyl cis-trans isomerase %28PPIase%29;protein_id=YP_008637707.1;transl_table=11 putative peptidyl-prolyl cis-trans isomerase %28PPIase%29 (1008728-1010119 -)	silent aag -> aaA;	1138 1420 1646 1680 1811 220 301 3035 XCP123
NC_022541.1	1009316	g	g	g	A	g	g	A	g	g	A	g	A	g	A	g	A	g	A	A	g	g	g	g	g	g	g	A	cds812;Name=YP_008637707.1;Parent=gene868;Dbxref=Genbank:YP_008637707.1,GeneID:17152557;gbkey=CDS;gene=surA;product=putative peptidyl-prolyl cis-trans isomerase %28PPIase%29;protein_id=YP_008637707.1;transl_table=11 putative peptidyl-prolyl cis-trans isomerase %28PPIase%29 (1008728-1010119 -)	silent ggc -> ggT;	1138 1420 1646 1680 1811 220 301 3035 XCP123
NC_022541.1	1009337	t	t	t	G	t	t	G	t	t	G	t	G	t	G	t	G	t	G	G	t	t	t	t	t	t	t	G	cds812;Name=YP_008637707.1;Parent=gene868;Dbxref=Genbank:YP_008637707.1,GeneID:17152557;gbkey=CDS;gene=surA;product=putative peptidyl-prolyl cis-trans isomerase %28PPIase%29;protein_id=YP_008637707.1;transl_table=11 putative peptidyl-prolyl cis-trans isomerase %28PPIase%29 (1008728-1010119 -)	silent gga -> ggC;	1138 1420 1646 1680 1811 220 301 3035 XCP123
NC_022541.1	1009349	a	a	a	G	a	a	G	a	a	G	a	G	G	G	G	G	a	G	G	a	a	G	G	a	a	a	G	cds812;Name=YP_008637707.1;Parent=gene868;Dbxref=Genbank:YP_008637707.1,GeneID:17152557;gbkey=CDS;gene=surA;product=putative peptidyl-prolyl cis-trans isomerase %28PPIase%29;protein_id=YP_008637707.1;transl_table=11 putative peptidyl-prolyl cis-trans isomerase %28PPIase%29 (1008728-1010119 -)	silent ggt -> ggC;	1138 1420 1646 1680 1713 1811 2064 220 301 3035 556 557 XCP123
NC_022541.1	1009352	g	g	g	A	g	g	A	g	g	A	g	A	A	A	A	A	g	A	A	g	g	A	A	g	g	g	A	cds812;Name=YP_008637707.1;Parent=gene868;Dbxref=Genbank:YP_008637707.1,GeneID:17152557;gbkey=CDS;gene=surA;product=putative peptidyl-prolyl cis-trans isomerase %28PPIase%29;protein_id=YP_008637707.1;transl_table=11 putative peptidyl-prolyl cis-trans isomerase %28PPIase%29 (1008728-1010119 -)	silent ccc -> ccT;	1138 1420 1646 1680 1713 1811 2064 220 301 3035 556 557 XCP123
NC_022541.1	1009379	g	g	g	A	g	g	A	g	g	A	g	A	g	A	g	A	g	A	A	g	g	g	g	g	g	g	A	cds812;Name=YP_008637707.1;Parent=gene868;Dbxref=Genbank:YP_008637707.1,GeneID:17152557;gbkey=CDS;gene=surA;product=putative peptidyl-prolyl cis-trans isomerase %28PPIase%29;protein_id=YP_008637707.1;transl_table=11 putative peptidyl-prolyl cis-trans isomerase %28PPIase%29 (1008728-1010119 -)	silent ttc -> ttT;	1138 1420 1646 1680 1811 220 301 3035 XCP123
NC_022541.1	100938	t	t	t	t	t	t	t	t	t	t	t	t	C	t	C	t	t	t	t	t	t	C	C	t	t	t	t	cds81;Name=YP_008636976.1;Parent=gene84;Dbxref=Genbank:YP_008636976.1,GeneID:17152343;gbkey=CDS;gene=kduI;product=5-keto 4-deoxyuronate isomerase%2C probable;protein_id=YP_008636976.1;transl_table=11 5-keto 4-deoxyuronate isomerase%2C probable (100259-101113 -)	non-silent aag -> aGg;	1713 2064 556 557
NC_022541.1	1009385	g	g	g	g	g	g	g	g	g	g	g	g	A	g	A	g	g	g	g	g	g	A	A	g	g	g	g	cds812;Name=YP_008637707.1;Parent=gene868;Dbxref=Genbank:YP_008637707.1,GeneID:17152557;gbkey=CDS;gene=surA;product=putative peptidyl-prolyl cis-trans isomerase %28PPIase%29;protein_id=YP_008637707.1;transl_table=11 putative peptidyl-prolyl cis-trans isomerase %28PPIase%29 (1008728-1010119 -)	silent aac -> aaT;	1713 2064 556 557
NC_022541.1	1009388	g	g	g	C	g	g	C	g	g	C	g	C	g	C	g	C	g	C	C	g	g	g	g	g	g	g	C	cds812;Name=YP_008637707.1;Parent=gene868;Dbxref=Genbank:YP_008637707.1,GeneID:17152557;gbkey=CDS;gene=surA;product=putative peptidyl-prolyl cis-trans isomerase %28PPIase%29;protein_id=YP_008637707.1;transl_table=11 putative peptidyl-prolyl cis-trans isomerase %28PPIase%29 (1008728-1010119 -)	silent ccc -> ccG;	1138 1420 1646 1680 1811 220 301 3035 XCP123
NC_022541.1	1009417	g	g	g	A	g	g	A	g	g	A	g	A	g	A	g	A	g	A	A	g	g	g	g	g	g	g	A	cds812;Name=YP_008637707.1;Parent=gene868;Dbxref=Genbank:YP_008637707.1,GeneID:17152557;gbkey=CDS;gene=surA;product=putative peptidyl-prolyl cis-trans isomerase %28PPIase%29;protein_id=YP_008637707.1;transl_table=11 putative peptidyl-prolyl cis-trans isomerase %28PPIase%29 (1008728-1010119 -)	silent ctg -> Ttg;	1138 1420 1646 1680 1811 220 301 3035 XCP123
NC_022541.1	100949	c	c	c	G	c	c	G	c	c	G	c	G	c	G	c	G	c	G	G	c	c	c	c	c	c	c	G	cds81;Name=YP_008636976.1;Parent=gene84;Dbxref=Genbank:YP_008636976.1,GeneID:17152343;gbkey=CDS;gene=kduI;product=5-keto 4-deoxyuronate isomerase%2C probable;protein_id=YP_008636976.1;transl_table=11 5-keto 4-deoxyuronate isomerase%2C probable (100259-101113 -)	silent gcg -> gcC;	1138 1420 1646 1680 1811 220 301 3035 XCP123
NC_022541.1	1009502	t	t	t	C	t	t	C	t	t	C	t	C	t	C	t	C	t	C	C	t	t	t	t	t	t	t	C	cds812;Name=YP_008637707.1;Parent=gene868;Dbxref=Genbank:YP_008637707.1,GeneID:17152557;gbkey=CDS;gene=surA;product=putative peptidyl-prolyl cis-trans isomerase %28PPIase%29;protein_id=YP_008637707.1;transl_table=11 putative peptidyl-prolyl cis-trans isomerase %28PPIase%29 (1008728-1010119 -)	silent aaa -> aaG;	1138 1420 1646 1680 1811 220 301 3035 XCP123
NC_022541.1	1009520	t	t	t	C	t	t	C	t	t	C	t	C	C	C	C	C	t	C	C	t	t	C	C	t	t	t	C	cds812;Name=YP_008637707.1;Parent=gene868;Dbxref=Genbank:YP_008637707.1,GeneID:17152557;gbkey=CDS;gene=surA;product=putative peptidyl-prolyl cis-trans isomerase %28PPIase%29;protein_id=YP_008637707.1;transl_table=11 putative peptidyl-prolyl cis-trans isomerase %28PPIase%29 (1008728-1010119 -)	silent aaa -> aaG;	1138 1420 1646 1680 1713 1811 2064 220 301 3035 556 557 XCP123
NC_022541.1	1009529	g	g	g	A	g	g	A	g	g	A	g	A	g	A	g	A	g	A	A	g	g	g	g	g	g	g	A	cds812;Name=YP_008637707.1;Parent=gene868;Dbxref=Genbank:YP_008637707.1,GeneID:17152557;gbkey=CDS;gene=surA;product=putative peptidyl-prolyl cis-trans isomerase %28PPIase%29;protein_id=YP_008637707.1;transl_table=11 putative peptidyl-prolyl cis-trans isomerase %28PPIase%29 (1008728-1010119 -)	silent acc -> acT;	1138 1420 1646 1680 1811 220 301 3035 XCP123
NC_022541.1	1009541	t	t	t	C	t	t	C	t	t	C	t	C	C	C	C	C	t	C	C	t	t	C	C	t	t	t	C	cds812;Name=YP_008637707.1;Parent=gene868;Dbxref=Genbank:YP_008637707.1,GeneID:17152557;gbkey=CDS;gene=surA;product=putative peptidyl-prolyl cis-trans isomerase %28PPIase%29;protein_id=YP_008637707.1;transl_table=11 putative peptidyl-prolyl cis-trans isomerase %28PPIase%29 (1008728-1010119 -)	silent gaa -> gaG;	1138 1420 1646 1680 1713 1811 2064 220 301 3035 556 557 XCP123
NC_022541.1	1009548	t	t	t	G	t	t	G	t	t	G	t	G	t	G	t	G	t	G	G	t	t	t	t	t	t	t	G	cds812;Name=YP_008637707.1;Parent=gene868;Dbxref=Genbank:YP_008637707.1,GeneID:17152557;gbkey=CDS;gene=surA;product=putative peptidyl-prolyl cis-trans isomerase %28PPIase%29;protein_id=YP_008637707.1;transl_table=11 putative peptidyl-prolyl cis-trans isomerase %28PPIase%29 (1008728-1010119 -)	non-silent aat -> aCt;	1138 1420 1646 1680 1811 220 301 3035 XCP123
NC_022541.1	1009598	g	g	g	A	g	g	A	g	g	A	g	A	A	A	A	A	g	A	A	g	g	A	A	g	g	g	A	cds812;Name=YP_008637707.1;Parent=gene868;Dbxref=Genbank:YP_008637707.1,GeneID:17152557;gbkey=CDS;gene=surA;product=putative peptidyl-prolyl cis-trans isomerase %28PPIase%29;protein_id=YP_008637707.1;transl_table=11 putative peptidyl-prolyl cis-trans isomerase %28PPIase%29 (1008728-1010119 -)	silent ggc -> ggT;	1138 1420 1646 1680 1713 1811 2064 220 301 3035 556 557 XCP123
NC_022541.1	1009625	g	g	g	A	g	g	A	g	g	A	g	A	g	A	g	A	g	A	A	g	g	g	g	g	g	g	A	cds812;Name=YP_008637707.1;Parent=gene868;Dbxref=Genbank:YP_008637707.1,GeneID:17152557;gbkey=CDS;gene=surA;product=putative peptidyl-prolyl cis-trans isomerase %28PPIase%29;protein_id=YP_008637707.1;transl_table=11 putative peptidyl-prolyl cis-trans isomerase %28PPIase%29 (1008728-1010119 -)	silent acc -> acT;	1138 1420 1646 1680 1811 220 301 3035 XCP123
NC_022541.1	1009634	c	c	c	T	c	c	T	c	c	T	c	T	c	T	c	T	c	T	T	c	c	c	c	c	c	c	T	cds812;Name=YP_008637707.1;Parent=gene868;Dbxref=Genbank:YP_008637707.1,GeneID:17152557;gbkey=CDS;gene=surA;product=putative peptidyl-prolyl cis-trans isomerase %28PPIase%29;protein_id=YP_008637707.1;transl_table=11 putative peptidyl-prolyl cis-trans isomerase %28PPIase%29 (1008728-1010119 -)	silent gag -> gaA;	1138 1420 1646 1680 1811 220 301 3035 XCP123
NC_022541.1	1009667	g	g	g	A	g	g	A	g	g	A	g	A	g	A	g	A	g	A	A	g	g	g	g	g	g	g	A	cds812;Name=YP_008637707.1;Parent=gene868;Dbxref=Genbank:YP_008637707.1,GeneID:17152557;gbkey=CDS;gene=surA;product=putative peptidyl-prolyl cis-trans isomerase %28PPIase%29;protein_id=YP_008637707.1;transl_table=11 putative peptidyl-prolyl cis-trans isomerase %28PPIase%29 (1008728-1010119 -)	silent ttc -> ttT;	1138 1420 1646 1680 1811 220 301 3035 XCP123
NC_022541.1	1009673	c	c	c	T	c	c	T	c	c	T	c	T	c	T	c	T	c	T	T	c	c	c	c	c	c	c	T	cds812;Name=YP_008637707.1;Parent=gene868;Dbxref=Genbank:YP_008637707.1,GeneID:17152557;gbkey=CDS;gene=surA;product=putative peptidyl-prolyl cis-trans isomerase %28PPIase%29;protein_id=YP_008637707.1;transl_table=11 putative peptidyl-prolyl cis-trans isomerase %28PPIase%29 (1008728-1010119 -)	silent cag -> caA;	1138 1420 1646 1680 1811 220 301 3035 XCP123
NC_022541.1	1009772	g	g	g	C	g	g	C	g	g	C	g	C	g	C	g	C	g	C	C	g	g	g	g	g	g	g	C	cds812;Name=YP_008637707.1;Parent=gene868;Dbxref=Genbank:YP_008637707.1,GeneID:17152557;gbkey=CDS;gene=surA;product=putative peptidyl-prolyl cis-trans isomerase %28PPIase%29;protein_id=YP_008637707.1;transl_table=11 putative peptidyl-prolyl cis-trans isomerase %28PPIase%29 (1008728-1010119 -)	silent acc -> acG;	1138 1420 1646 1680 1811 220 301 3035 XCP123
NC_022541.1	1009778	a	a	a	G	a	a	G	a	a	G	a	G	G	G	G	G	a	G	G	a	a	G	G	a	a	a	G	cds812;Name=YP_008637707.1;Parent=gene868;Dbxref=Genbank:YP_008637707.1,GeneID:17152557;gbkey=CDS;gene=surA;product=putative peptidyl-prolyl cis-trans isomerase %28PPIase%29;protein_id=YP_008637707.1;transl_table=11 putative peptidyl-prolyl cis-trans isomerase %28PPIase%29 (1008728-1010119 -)	silent ggt -> ggC;	1138 1420 1646 1680 1713 1811 2064 220 301 3035 556 557 XCP123
NC_022541.1	1009817	c	c	c	T	c	c	T	c	c	T	c	T	c	T	c	T	c	T	T	c	c	c	c	c	c	c	T	cds812;Name=YP_008637707.1;Parent=gene868;Dbxref=Genbank:YP_008637707.1,GeneID:17152557;gbkey=CDS;gene=surA;product=putative peptidyl-prolyl cis-trans isomerase %28PPIase%29;protein_id=YP_008637707.1;transl_table=11 putative peptidyl-prolyl cis-trans isomerase %28PPIase%29 (1008728-1010119 -)	silent gag -> gaA;	1138 1420 1646 1680 1811 220 301 3035 XCP123
NC_022541.1	1009820	c	c	c	T	c	c	T	c	c	T	c	T	c	T	c	T	c	T	T	c	c	c	c	c	c	c	T	cds812;Name=YP_008637707.1;Parent=gene868;Dbxref=Genbank:YP_008637707.1,GeneID:17152557;gbkey=CDS;gene=surA;product=putative peptidyl-prolyl cis-trans isomerase %28PPIase%29;protein_id=YP_008637707.1;transl_table=11 putative peptidyl-prolyl cis-trans isomerase %28PPIase%29 (1008728-1010119 -)	silent gag -> gaA;	1138 1420 1646 1680 1811 220 301 3035 XCP123
NC_022541.1	1009823	g	g	g	A	g	g	A	g	g	A	g	A	g	A	g	A	g	A	A	g	g	g	g	g	g	g	A	cds812;Name=YP_008637707.1;Parent=gene868;Dbxref=Genbank:YP_008637707.1,GeneID:17152557;gbkey=CDS;gene=surA;product=putative peptidyl-prolyl cis-trans isomerase %28PPIase%29;protein_id=YP_008637707.1;transl_table=11 putative peptidyl-prolyl cis-trans isomerase %28PPIase%29 (1008728-1010119 -)	silent gac -> gaT;	1138 1420 1646 1680 1811 220 301 3035 XCP123
NC_022541.1	1009832	g	g	g	A	g	g	A	g	g	A	g	A	g	A	g	A	g	A	A	g	g	g	g	g	g	g	A	cds812;Name=YP_008637707.1;Parent=gene868;Dbxref=Genbank:YP_008637707.1,GeneID:17152557;gbkey=CDS;gene=surA;product=putative peptidyl-prolyl cis-trans isomerase %28PPIase%29;protein_id=YP_008637707.1;transl_table=11 putative peptidyl-prolyl cis-trans isomerase %28PPIase%29 (1008728-1010119 -)	silent cgc -> cgT;	1138 1420 1646 1680 1811 220 301 3035 XCP123
NC_022541.1	1009838	a	a	a	G	a	a	G	a	a	G	a	G	a	G	a	G	a	G	G	a	a	a	a	a	a	a	G	cds812;Name=YP_008637707.1;Parent=gene868;Dbxref=Genbank:YP_008637707.1,GeneID:17152557;gbkey=CDS;gene=surA;product=putative peptidyl-prolyl cis-trans isomerase %28PPIase%29;protein_id=YP_008637707.1;transl_table=11 putative peptidyl-prolyl cis-trans isomerase %28PPIase%29 (1008728-1010119 -)	silent ggt -> ggC;	1138 1420 1646 1680 1811 220 301 3035 XCP123
NC_022541.1	1009853	g	g	g	A	g	g	A	g	g	A	g	A	g	A	g	A	g	A	A	g	g	g	g	g	g	g	A	cds812;Name=YP_008637707.1;Parent=gene868;Dbxref=Genbank:YP_008637707.1,GeneID:17152557;gbkey=CDS;gene=surA;product=putative peptidyl-prolyl cis-trans isomerase %28PPIase%29;protein_id=YP_008637707.1;transl_table=11 putative peptidyl-prolyl cis-trans isomerase %28PPIase%29 (1008728-1010119 -)	silent cgc -> cgT;	1138 1420 1646 1680 1811 220 301 3035 XCP123
NC_022541.1	1009877	t	t	t	C	t	t	C	t	t	C	t	C	C	C	C	C	t	C	C	t	t	C	C	t	t	t	C	cds812;Name=YP_008637707.1;Parent=gene868;Dbxref=Genbank:YP_008637707.1,GeneID:17152557;gbkey=CDS;gene=surA;product=putative peptidyl-prolyl cis-trans isomerase %28PPIase%29;protein_id=YP_008637707.1;transl_table=11 putative peptidyl-prolyl cis-trans isomerase %28PPIase%29 (1008728-1010119 -)	silent gta -> gtG;	1138 1420 1646 1680 1713 1811 2064 220 301 3035 556 557 XCP123
NC_022541.1	100988	c	c	c	c	c	c	c	c	c	c	c	c	T	c	T	c	c	c	c	c	c	T	T	c	c	c	c	cds81;Name=YP_008636976.1;Parent=gene84;Dbxref=Genbank:YP_008636976.1,GeneID:17152343;gbkey=CDS;gene=kduI;product=5-keto 4-deoxyuronate isomerase%2C probable;protein_id=YP_008636976.1;transl_table=11 5-keto 4-deoxyuronate isomerase%2C probable (100259-101113 -)	silent aag -> aaA;	1713 2064 556 557
NC_022541.1	1009882	a	a	a	G	a	a	G	a	a	G	a	G	a	G	a	G	a	G	G	a	a	a	a	a	a	a	G	cds812;Name=YP_008637707.1;Parent=gene868;Dbxref=Genbank:YP_008637707.1,GeneID:17152557;gbkey=CDS;gene=surA;product=putative peptidyl-prolyl cis-trans isomerase %28PPIase%29;protein_id=YP_008637707.1;transl_table=11 putative peptidyl-prolyl cis-trans isomerase %28PPIase%29 (1008728-1010119 -)	silent ttg -> Ctg;	1138 1420 1646 1680 1811 220 301 3035 XCP123
NC_022541.1	1009964	g	g	g	C	g	g	C	g	g	C	g	C	g	C	g	C	g	C	C	g	g	g	g	g	g	g	C	cds812;Name=YP_008637707.1;Parent=gene868;Dbxref=Genbank:YP_008637707.1,GeneID:17152557;gbkey=CDS;gene=surA;product=putative peptidyl-prolyl cis-trans isomerase %28PPIase%29;protein_id=YP_008637707.1;transl_table=11 putative peptidyl-prolyl cis-trans isomerase %28PPIase%29 (1008728-1010119 -)	silent gtc -> gtG;	1138 1420 1646 1680 1811 220 301 3035 XCP123
NC_022541.1	1009964	g	g	g	g	g	g	g	g	g	g	g	g	T	g	T	g	g	g	g	g	g	T	T	g	g	g	g	cds812;Name=YP_008637707.1;Parent=gene868;Dbxref=Genbank:YP_008637707.1,GeneID:17152557;gbkey=CDS;gene=surA;product=putative peptidyl-prolyl cis-trans isomerase %28PPIase%29;protein_id=YP_008637707.1;transl_table=11 putative peptidyl-prolyl cis-trans isomerase %28PPIase%29 (1008728-1010119 -)	silent gtc -> gtA;	1713 2064 556 557
NC_022541.1	101003	a	a	a	G	a	a	G	a	a	G	a	G	G	G	G	G	a	G	G	a	a	G	G	a	a	a	G	cds81;Name=YP_008636976.1;Parent=gene84;Dbxref=Genbank:YP_008636976.1,GeneID:17152343;gbkey=CDS;gene=kduI;product=5-keto 4-deoxyuronate isomerase%2C probable;protein_id=YP_008636976.1;transl_table=11 5-keto 4-deoxyuronate isomerase%2C probable (100259-101113 -)	silent gat -> gaC;	1138 1420 1646 1680 1713 1811 2064 220 301 3035 556 557 XCP123
NC_022541.1	1010075	a	a	a	G	a	a	G	a	a	G	a	G	G	G	G	G	a	G	G	a	a	G	G	a	a	a	G	cds812;Name=YP_008637707.1;Parent=gene868;Dbxref=Genbank:YP_008637707.1,GeneID:17152557;gbkey=CDS;gene=surA;product=putative peptidyl-prolyl cis-trans isomerase %28PPIase%29;protein_id=YP_008637707.1;transl_table=11 putative peptidyl-prolyl cis-trans isomerase %28PPIase%29 (1008728-1010119 -)	silent att -> atC;	1138 1420 1646 1680 1713 1811 2064 220 301 3035 556 557 XCP123
NC_022541.1	1010093	a	a	a	a	a	a	a	a	a	a	a	a	G	a	G	a	a	a	a	a	a	G	G	a	a	a	a	cds812;Name=YP_008637707.1;Parent=gene868;Dbxref=Genbank:YP_008637707.1,GeneID:17152557;gbkey=CDS;gene=surA;product=putative peptidyl-prolyl cis-trans isomerase %28PPIase%29;protein_id=YP_008637707.1;transl_table=11 putative peptidyl-prolyl cis-trans isomerase %28PPIase%29 (1008728-1010119 -)	silent ctt -> ctC;	1713 2064 556 557
NC_022541.1	1010272	g	g	g	g	g	g	g	g	g	g	g	g	T	g	T	g	g	g	g	g	g	T	T	g	g	g	g	cds813;Name=YP_008637708.1;Parent=gene869;Dbxref=Genbank:YP_008637708.1,GeneID:17152911;gbkey=CDS;gene=lptD;product=Probable LPS transport and assembly outer membrane component LptD;protein_id=YP_008637708.1;transl_table=11 Probable LPS transport and assembly outer membrane component LptD (1010116-1012554 -)	silent atc -> atA;	1713 2064 556 557
NC_022541.1	1010296	c	c	c	c	c	c	c	c	c	c	c	c	G	c	G	c	c	c	c	c	c	G	G	c	c	c	c	cds813;Name=YP_008637708.1;Parent=gene869;Dbxref=Genbank:YP_008637708.1,GeneID:17152911;gbkey=CDS;gene=lptD;product=Probable LPS transport and assembly outer membrane component LptD;protein_id=YP_008637708.1;transl_table=11 Probable LPS transport and assembly outer membrane component LptD (1010116-1012554 -)	silent ggg -> ggC;	1713 2064 556 557
NC_022541.1	101030	a	a	a	G	a	a	G	a	a	G	a	G	a	G	a	G	a	G	G	a	a	a	a	a	a	a	G	cds81;Name=YP_008636976.1;Parent=gene84;Dbxref=Genbank:YP_008636976.1,GeneID:17152343;gbkey=CDS;gene=kduI;product=5-keto 4-deoxyuronate isomerase%2C probable;protein_id=YP_008636976.1;transl_table=11 5-keto 4-deoxyuronate isomerase%2C probable (100259-101113 -)	silent tat -> taC;	1138 1420 1646 1680 1811 220 301 3035 XCP123
NC_022541.1	1010308	a	a	a	a	a	a	a	a	a	a	a	a	G	a	G	a	a	a	a	a	a	G	G	a	a	a	a	cds813;Name=YP_008637708.1;Parent=gene869;Dbxref=Genbank:YP_008637708.1,GeneID:17152911;gbkey=CDS;gene=lptD;product=Probable LPS transport and assembly outer membrane component LptD;protein_id=YP_008637708.1;transl_table=11 Probable LPS transport and assembly outer membrane component LptD (1010116-1012554 -)	silent cgt -> cgC;	1713 2064 556 557
NC_022541.1	1010317	c	c	c	c	c	c	c	c	c	c	c	c	T	c	T	c	c	c	c	c	c	T	T	c	c	c	c	cds813;Name=YP_008637708.1;Parent=gene869;Dbxref=Genbank:YP_008637708.1,GeneID:17152911;gbkey=CDS;gene=lptD;product=Probable LPS transport and assembly outer membrane component LptD;protein_id=YP_008637708.1;transl_table=11 Probable LPS transport and assembly outer membrane component LptD (1010116-1012554 -)	silent cgg -> cgA;	1713 2064 556 557
NC_022541.1	1010335	t	t	t	C	t	t	C	t	t	C	t	C	t	C	t	C	t	C	C	t	t	t	t	t	t	t	C	cds813;Name=YP_008637708.1;Parent=gene869;Dbxref=Genbank:YP_008637708.1,GeneID:17152911;gbkey=CDS;gene=lptD;product=Probable LPS transport and assembly outer membrane component LptD;protein_id=YP_008637708.1;transl_table=11 Probable LPS transport and assembly outer membrane component LptD (1010116-1012554 -)	silent gta -> gtG;	1138 1420 1646 1680 1811 220 301 3035 XCP123
NC_022541.1	1010401	a	a	a	a	a	a	a	a	a	a	a	a	C	a	C	a	a	a	a	a	a	C	C	a	a	a	a	cds813;Name=YP_008637708.1;Parent=gene869;Dbxref=Genbank:YP_008637708.1,GeneID:17152911;gbkey=CDS;gene=lptD;product=Probable LPS transport and assembly outer membrane component LptD;protein_id=YP_008637708.1;transl_table=11 Probable LPS transport and assembly outer membrane component LptD (1010116-1012554 -)	silent tct -> tcG;	1713 2064 556 557
NC_022541.1	1010449	c	c	c	c	c	c	c	c	c	c	c	c	G	c	G	c	c	c	c	c	c	G	G	c	c	c	c	cds813;Name=YP_008637708.1;Parent=gene869;Dbxref=Genbank:YP_008637708.1,GeneID:17152911;gbkey=CDS;gene=lptD;product=Probable LPS transport and assembly outer membrane component LptD;protein_id=YP_008637708.1;transl_table=11 Probable LPS transport and assembly outer membrane component LptD (1010116-1012554 -)	silent ctg -> ctC;	1713 2064 556 557
NC_022541.1	101045	g	g	g	C	g	g	C	g	g	C	g	C	g	C	g	C	g	C	C	g	g	g	g	g	g	g	C	cds81;Name=YP_008636976.1;Parent=gene84;Dbxref=Genbank:YP_008636976.1,GeneID:17152343;gbkey=CDS;gene=kduI;product=5-keto 4-deoxyuronate isomerase%2C probable;protein_id=YP_008636976.1;transl_table=11 5-keto 4-deoxyuronate isomerase%2C probable (100259-101113 -)	non-silent gac -> gaG;	1138 1420 1646 1680 1811 220 301 3035 XCP123
NC_022541.1	101046	t	t	t	G	t	t	G	t	t	G	t	G	t	G	t	G	t	G	G	t	t	t	t	t	t	t	G	cds81;Name=YP_008636976.1;Parent=gene84;Dbxref=Genbank:YP_008636976.1,GeneID:17152343;gbkey=CDS;gene=kduI;product=5-keto 4-deoxyuronate isomerase%2C probable;protein_id=YP_008636976.1;transl_table=11 5-keto 4-deoxyuronate isomerase%2C probable (100259-101113 -)	non-silent gac -> gCc;	1138 1420 1646 1680 1811 220 301 3035 XCP123
NC_022541.1	1010470	c	c	c	c	c	c	c	c	c	c	c	c	T	c	T	c	c	c	c	c	c	T	T	c	c	c	c	cds813;Name=YP_008637708.1;Parent=gene869;Dbxref=Genbank:YP_008637708.1,GeneID:17152911;gbkey=CDS;gene=lptD;product=Probable LPS transport and assembly outer membrane component LptD;protein_id=YP_008637708.1;transl_table=11 Probable LPS transport and assembly outer membrane component LptD (1010116-1012554 -)	silent aag -> aaA;	1713 2064 556 557
NC_022541.1	1010521	g	g	g	A	g	g	A	g	g	A	g	A	g	A	g	A	g	A	A	g	g	g	g	g	g	g	A	cds813;Name=YP_008637708.1;Parent=gene869;Dbxref=Genbank:YP_008637708.1,GeneID:17152911;gbkey=CDS;gene=lptD;product=Probable LPS transport and assembly outer membrane component LptD;protein_id=YP_008637708.1;transl_table=11 Probable LPS transport and assembly outer membrane component LptD (1010116-1012554 -)	silent aac -> aaT;	1138 1420 1646 1680 1811 220 301 3035 XCP123
NC_022541.1	1010662	g	g	g	g	g	g	g	g	g	g	g	g	C	g	C	g	g	g	g	g	g	C	C	g	g	g	g	cds813;Name=YP_008637708.1;Parent=gene869;Dbxref=Genbank:YP_008637708.1,GeneID:17152911;gbkey=CDS;gene=lptD;product=Probable LPS transport and assembly outer membrane component LptD;protein_id=YP_008637708.1;transl_table=11 Probable LPS transport and assembly outer membrane component LptD (1010116-1012554 -)	silent tcc -> tcG;	1713 2064 556 557
NC_022541.1	1010674	g	g	g	g	g	g	g	g	g	g	g	g	C	g	C	g	g	g	g	g	g	C	C	g	g	g	g	cds813;Name=YP_008637708.1;Parent=gene869;Dbxref=Genbank:YP_008637708.1,GeneID:17152911;gbkey=CDS;gene=lptD;product=Probable LPS transport and assembly outer membrane component LptD;protein_id=YP_008637708.1;transl_table=11 Probable LPS transport and assembly outer membrane component LptD (1010116-1012554 -)	non-silent gac -> gaG;	1713 2064 556 557
NC_022541.1	1010679	t	t	t	t	t	t	t	t	t	t	t	t	C	t	C	t	t	t	t	t	t	C	C	t	t	t	t	cds813;Name=YP_008637708.1;Parent=gene869;Dbxref=Genbank:YP_008637708.1,GeneID:17152911;gbkey=CDS;gene=lptD;product=Probable LPS transport and assembly outer membrane component LptD;protein_id=YP_008637708.1;transl_table=11 Probable LPS transport and assembly outer membrane component LptD (1010116-1012554 -)	non-silent atc -> Gtc;	1713 2064 556 557
NC_022541.1	1010686	t	t	t	t	t	t	t	t	t	t	t	t	C	t	C	t	t	t	t	t	t	C	C	t	t	t	t	cds813;Name=YP_008637708.1;Parent=gene869;Dbxref=Genbank:YP_008637708.1,GeneID:17152911;gbkey=CDS;gene=lptD;product=Probable LPS transport and assembly outer membrane component LptD;protein_id=YP_008637708.1;transl_table=11 Probable LPS transport and assembly outer membrane component LptD (1010116-1012554 -)	silent gaa -> gaG;	1713 2064 556 557
NC_022541.1	1010698	t	t	t	t	t	t	t	t	t	t	t	t	C	t	C	t	t	t	t	t	t	C	C	t	t	t	t	cds813;Name=YP_008637708.1;Parent=gene869;Dbxref=Genbank:YP_008637708.1,GeneID:17152911;gbkey=CDS;gene=lptD;product=Probable LPS transport and assembly outer membrane component LptD;protein_id=YP_008637708.1;transl_table=11 Probable LPS transport and assembly outer membrane component LptD (1010116-1012554 -)	silent gca -> gcG;	1713 2064 556 557
NC_022541.1	1010703	c	c	c	c	c	c	c	c	c	c	c	c	A	c	A	c	c	c	c	c	c	A	A	c	c	c	c	cds813;Name=YP_008637708.1;Parent=gene869;Dbxref=Genbank:YP_008637708.1,GeneID:17152911;gbkey=CDS;gene=lptD;product=Probable LPS transport and assembly outer membrane component LptD;protein_id=YP_008637708.1;transl_table=11 Probable LPS transport and assembly outer membrane component LptD (1010116-1012554 -)	non-silent gcg -> Tcg;	1713 2064 556 557
NC_022541.1	1010725	g	g	g	g	g	g	g	g	g	g	g	g	C	g	C	g	g	g	g	g	g	C	C	g	g	g	g	cds813;Name=YP_008637708.1;Parent=gene869;Dbxref=Genbank:YP_008637708.1,GeneID:17152911;gbkey=CDS;gene=lptD;product=Probable LPS transport and assembly outer membrane component LptD;protein_id=YP_008637708.1;transl_table=11 Probable LPS transport and assembly outer membrane component LptD (1010116-1012554 -)	silent gtc -> gtG;	1713 2064 556 557
NC_022541.1	1010734	g	g	g	A	g	g	A	g	g	A	g	A	g	A	g	A	g	A	A	g	g	g	g	g	g	g	A	cds813;Name=YP_008637708.1;Parent=gene869;Dbxref=Genbank:YP_008637708.1,GeneID:17152911;gbkey=CDS;gene=lptD;product=Probable LPS transport and assembly outer membrane component LptD;protein_id=YP_008637708.1;transl_table=11 Probable LPS transport and assembly outer membrane component LptD (1010116-1012554 -)	silent gac -> gaT;	1138 1420 1646 1680 1811 220 301 3035 XCP123
NC_022541.1	1010743	a	a	a	G	a	a	G	a	a	G	a	G	G	G	G	G	a	G	G	a	a	G	G	a	a	a	G	cds813;Name=YP_008637708.1;Parent=gene869;Dbxref=Genbank:YP_008637708.1,GeneID:17152911;gbkey=CDS;gene=lptD;product=Probable LPS transport and assembly outer membrane component LptD;protein_id=YP_008637708.1;transl_table=11 Probable LPS transport and assembly outer membrane component LptD (1010116-1012554 -)	silent tat -> taC;	1138 1420 1646 1680 1713 1811 2064 220 301 3035 556 557 XCP123
NC_022541.1	1010761	a	a	a	a	a	a	a	a	a	a	a	a	G	a	G	a	a	a	a	a	a	G	G	a	a	a	a	cds813;Name=YP_008637708.1;Parent=gene869;Dbxref=Genbank:YP_008637708.1,GeneID:17152911;gbkey=CDS;gene=lptD;product=Probable LPS transport and assembly outer membrane component LptD;protein_id=YP_008637708.1;transl_table=11 Probable LPS transport and assembly outer membrane component LptD (1010116-1012554 -)	silent agt -> agC;	1713 2064 556 557
NC_022541.1	1010782	a	a	a	a	a	a	a	a	a	a	a	a	G	a	G	a	a	a	a	a	a	G	G	a	a	a	a	cds813;Name=YP_008637708.1;Parent=gene869;Dbxref=Genbank:YP_008637708.1,GeneID:17152911;gbkey=CDS;gene=lptD;product=Probable LPS transport and assembly outer membrane component LptD;protein_id=YP_008637708.1;transl_table=11 Probable LPS transport and assembly outer membrane component LptD (1010116-1012554 -)	silent ggt -> ggC;	1713 2064 556 557
NC_022541.1	1010803	g	g	g	g	g	g	g	g	g	g	g	g	A	g	A	g	g	g	g	g	g	A	A	g	g	g	g	cds813;Name=YP_008637708.1;Parent=gene869;Dbxref=Genbank:YP_008637708.1,GeneID:17152911;gbkey=CDS;gene=lptD;product=Probable LPS transport and assembly outer membrane component LptD;protein_id=YP_008637708.1;transl_table=11 Probable LPS transport and assembly outer membrane component LptD (1010116-1012554 -)	silent cgc -> cgT;	1713 2064 556 557
NC_022541.1	1010854	g	g	g	g	g	g	g	g	g	g	g	g	A	g	A	g	g	g	g	g	g	A	A	g	g	g	g	cds813;Name=YP_008637708.1;Parent=gene869;Dbxref=Genbank:YP_008637708.1,GeneID:17152911;gbkey=CDS;gene=lptD;product=Probable LPS transport and assembly outer membrane component LptD;protein_id=YP_008637708.1;transl_table=11 Probable LPS transport and assembly outer membrane component LptD (1010116-1012554 -)	silent ggc -> ggT;	1713 2064 556 557
NC_022541.1	1010884	c	c	c	c	c	c	c	c	c	c	c	c	G	c	G	c	c	c	c	c	c	G	G	c	c	c	c	cds813;Name=YP_008637708.1;Parent=gene869;Dbxref=Genbank:YP_008637708.1,GeneID:17152911;gbkey=CDS;gene=lptD;product=Probable LPS transport and assembly outer membrane component LptD;protein_id=YP_008637708.1;transl_table=11 Probable LPS transport and assembly outer membrane component LptD (1010116-1012554 -)	silent ggg -> ggC;	1713 2064 556 557
NC_022541.1	101090	a	a	a	G	a	a	G	a	a	G	a	G	a	G	a	G	a	G	G	a	a	a	a	a	a	a	G	cds81;Name=YP_008636976.1;Parent=gene84;Dbxref=Genbank:YP_008636976.1,GeneID:17152343;gbkey=CDS;gene=kduI;product=5-keto 4-deoxyuronate isomerase%2C probable;protein_id=YP_008636976.1;transl_table=11 5-keto 4-deoxyuronate isomerase%2C probable (100259-101113 -)	silent cat -> caC;	1138 1420 1646 1680 1811 220 301 3035 XCP123
NC_022541.1	101093	g	g	g	C	g	g	C	g	g	C	g	C	g	C	g	C	g	C	C	g	g	g	g	g	g	g	C	cds81;Name=YP_008636976.1;Parent=gene84;Dbxref=Genbank:YP_008636976.1,GeneID:17152343;gbkey=CDS;gene=kduI;product=5-keto 4-deoxyuronate isomerase%2C probable;protein_id=YP_008636976.1;transl_table=11 5-keto 4-deoxyuronate isomerase%2C probable (100259-101113 -)	silent acc -> acG;	1138 1420 1646 1680 1811 220 301 3035 XCP123
NC_022541.1	101096	c	c	c	T	c	c	T	c	c	T	c	T	c	T	c	T	c	T	T	c	c	c	c	c	c	c	T	cds81;Name=YP_008636976.1;Parent=gene84;Dbxref=Genbank:YP_008636976.1,GeneID:17152343;gbkey=CDS;gene=kduI;product=5-keto 4-deoxyuronate isomerase%2C probable;protein_id=YP_008636976.1;transl_table=11 5-keto 4-deoxyuronate isomerase%2C probable (100259-101113 -)	silent aag -> aaA;	1138 1420 1646 1680 1811 220 301 3035 XCP123
NC_022541.1	1011058	a	a	a	a	a	a	a	a	a	a	a	a	G	a	G	a	a	a	a	a	a	G	G	a	a	a	a	cds813;Name=YP_008637708.1;Parent=gene869;Dbxref=Genbank:YP_008637708.1,GeneID:17152911;gbkey=CDS;gene=lptD;product=Probable LPS transport and assembly outer membrane component LptD;protein_id=YP_008637708.1;transl_table=11 Probable LPS transport and assembly outer membrane component LptD (1010116-1012554 -)	silent cgt -> cgC;	1713 2064 556 557
NC_022541.1	1011067	c	c	c	c	c	c	c	c	c	c	c	c	G	c	G	c	c	c	c	c	c	G	G	c	c	c	c	cds813;Name=YP_008637708.1;Parent=gene869;Dbxref=Genbank:YP_008637708.1,GeneID:17152911;gbkey=CDS;gene=lptD;product=Probable LPS transport and assembly outer membrane component LptD;protein_id=YP_008637708.1;transl_table=11 Probable LPS transport and assembly outer membrane component LptD (1010116-1012554 -)	silent tcg -> tcC;	1713 2064 556 557
NC_022541.1	1011069	a	a	a	a	a	a	a	a	a	a	a	a	T	a	T	a	a	a	a	a	a	T	T	a	a	a	a	cds813;Name=YP_008637708.1;Parent=gene869;Dbxref=Genbank:YP_008637708.1,GeneID:17152911;gbkey=CDS;gene=lptD;product=Probable LPS transport and assembly outer membrane component LptD;protein_id=YP_008637708.1;transl_table=11 Probable LPS transport and assembly outer membrane component LptD (1010116-1012554 -)	non-silent tcg -> Acg;	1713 2064 556 557
NC_022541.1	1011073	g	g	g	g	g	g	g	g	g	g	g	g	A	g	A	g	g	g	g	g	g	A	A	g	g	g	g	cds813;Name=YP_008637708.1;Parent=gene869;Dbxref=Genbank:YP_008637708.1,GeneID:17152911;gbkey=CDS;gene=lptD;product=Probable LPS transport and assembly outer membrane component LptD;protein_id=YP_008637708.1;transl_table=11 Probable LPS transport and assembly outer membrane component LptD (1010116-1012554 -)	silent aac -> aaT;	1713 2064 556 557
NC_022541.1	1011086	a	a	a	a	a	a	a	a	a	a	a	a	G	a	G	a	a	a	a	a	a	G	G	a	a	a	a	cds813;Name=YP_008637708.1;Parent=gene869;Dbxref=Genbank:YP_008637708.1,GeneID:17152911;gbkey=CDS;gene=lptD;product=Probable LPS transport and assembly outer membrane component LptD;protein_id=YP_008637708.1;transl_table=11 Probable LPS transport and assembly outer membrane component LptD (1010116-1012554 -)	non-silent cta -> cCa;	1713 2064 556 557
NC_022541.1	1011087	g	g	g	g	g	g	g	g	g	g	g	g	C	g	C	g	g	g	g	g	g	C	C	g	g	g	g	cds813;Name=YP_008637708.1;Parent=gene869;Dbxref=Genbank:YP_008637708.1,GeneID:17152911;gbkey=CDS;gene=lptD;product=Probable LPS transport and assembly outer membrane component LptD;protein_id=YP_008637708.1;transl_table=11 Probable LPS transport and assembly outer membrane component LptD (1010116-1012554 -)	non-silent cta -> Gta;	1713 2064 556 557
NC_022541.1	1011091	t	t	t	t	t	t	t	t	t	t	t	t	G	t	G	t	t	t	t	t	t	G	G	t	t	t	t	cds813;Name=YP_008637708.1;Parent=gene869;Dbxref=Genbank:YP_008637708.1,GeneID:17152911;gbkey=CDS;gene=lptD;product=Probable LPS transport and assembly outer membrane component LptD;protein_id=YP_008637708.1;transl_table=11 Probable LPS transport and assembly outer membrane component LptD (1010116-1012554 -)	non-silent aaa -> aaC;	1713 2064 556 557
NC_022541.1	1011097	c	c	c	c	c	c	c	c	c	c	c	c	A	c	A	c	c	c	c	c	c	A	A	c	c	c	c	cds813;Name=YP_008637708.1;Parent=gene869;Dbxref=Genbank:YP_008637708.1,GeneID:17152911;gbkey=CDS;gene=lptD;product=Probable LPS transport and assembly outer membrane component LptD;protein_id=YP_008637708.1;transl_table=11 Probable LPS transport and assembly outer membrane component LptD (1010116-1012554 -)	silent ctg -> ctT;	1713 2064 556 557
NC_022541.1	1011112	c	c	c	c	c	c	c	c	c	c	c	c	T	c	T	c	c	c	c	c	c	T	T	c	c	c	c	cds813;Name=YP_008637708.1;Parent=gene869;Dbxref=Genbank:YP_008637708.1,GeneID:17152911;gbkey=CDS;gene=lptD;product=Probable LPS transport and assembly outer membrane component LptD;protein_id=YP_008637708.1;transl_table=11 Probable LPS transport and assembly outer membrane component LptD (1010116-1012554 -)	silent cag -> caA;	1713 2064 556 557
NC_022541.1	101115	c	c	c	*	c	c	*	c	c	*	c	*	c	*	c	*	c	*	*	c	c	c	c	c	c	c	*			1138 1420 1646 1680 1811 220 301 3035 XCP123
NC_022541.1	1011157	t	t	t	t	t	t	t	t	t	t	t	t	C	t	C	t	t	t	t	t	t	C	C	t	t	t	t	cds813;Name=YP_008637708.1;Parent=gene869;Dbxref=Genbank:YP_008637708.1,GeneID:17152911;gbkey=CDS;gene=lptD;product=Probable LPS transport and assembly outer membrane component LptD;protein_id=YP_008637708.1;transl_table=11 Probable LPS transport and assembly outer membrane component LptD (1010116-1012554 -)	silent gca -> gcG;	1713 2064 556 557
NC_022541.1	101118	g	g	g	*	g	g	*	g	g	*	g	*	g	*	g	*	g	*	*	g	g	g	g	g	g	g	*			1138 1420 1646 1680 1811 220 301 3035 XCP123
NC_022541.1	1011184	g	g	g	g	g	g	g	g	g	g	g	g	A	g	A	g	g	g	g	g	g	A	A	g	g	g	g	cds813;Name=YP_008637708.1;Parent=gene869;Dbxref=Genbank:YP_008637708.1,GeneID:17152911;gbkey=CDS;gene=lptD;product=Probable LPS transport and assembly outer membrane component LptD;protein_id=YP_008637708.1;transl_table=11 Probable LPS transport and assembly outer membrane component LptD (1010116-1012554 -)	silent tac -> taT;	1713 2064 556 557
NC_022541.1	1011217	g	g	g	g	g	g	g	g	g	g	g	g	A	g	A	g	g	g	g	g	g	A	A	g	g	g	g	cds813;Name=YP_008637708.1;Parent=gene869;Dbxref=Genbank:YP_008637708.1,GeneID:17152911;gbkey=CDS;gene=lptD;product=Probable LPS transport and assembly outer membrane component LptD;protein_id=YP_008637708.1;transl_table=11 Probable LPS transport and assembly outer membrane component LptD (1010116-1012554 -)	silent tac -> taT;	1713 2064 556 557
NC_022541.1	1011334	g	g	g	g	g	g	g	g	g	g	g	g	A	g	A	g	g	g	g	g	g	A	A	g	g	g	g	cds813;Name=YP_008637708.1;Parent=gene869;Dbxref=Genbank:YP_008637708.1,GeneID:17152911;gbkey=CDS;gene=lptD;product=Probable LPS transport and assembly outer membrane component LptD;protein_id=YP_008637708.1;transl_table=11 Probable LPS transport and assembly outer membrane component LptD (1010116-1012554 -)	silent cgc -> cgT;	1713 2064 556 557
NC_022541.1	1011340	c	c	c	c	c	c	c	c	c	c	c	c	G	c	G	c	c	c	c	c	c	G	G	c	c	c	c	cds813;Name=YP_008637708.1;Parent=gene869;Dbxref=Genbank:YP_008637708.1,GeneID:17152911;gbkey=CDS;gene=lptD;product=Probable LPS transport and assembly outer membrane component LptD;protein_id=YP_008637708.1;transl_table=11 Probable LPS transport and assembly outer membrane component LptD (1010116-1012554 -)	silent gcg -> gcC;	1713 2064 556 557
NC_022541.1	1011343	c	c	c	c	c	c	c	c	c	c	c	c	T	c	T	c	c	c	c	c	c	T	T	c	c	c	c	cds813;Name=YP_008637708.1;Parent=gene869;Dbxref=Genbank:YP_008637708.1,GeneID:17152911;gbkey=CDS;gene=lptD;product=Probable LPS transport and assembly outer membrane component LptD;protein_id=YP_008637708.1;transl_table=11 Probable LPS transport and assembly outer membrane component LptD (1010116-1012554 -)	silent gag -> gaA;	1713 2064 556 557
NC_022541.1	1011349	a	a	a	a	a	a	a	a	a	a	a	a	G	a	G	a	a	a	a	a	a	G	G	a	a	a	a	cds813;Name=YP_008637708.1;Parent=gene869;Dbxref=Genbank:YP_008637708.1,GeneID:17152911;gbkey=CDS;gene=lptD;product=Probable LPS transport and assembly outer membrane component LptD;protein_id=YP_008637708.1;transl_table=11 Probable LPS transport and assembly outer membrane component LptD (1010116-1012554 -)	silent tat -> taC;	1713 2064 556 557
NC_022541.1	1011354	t	t	t	t	t	t	t	t	t	t	t	t	C	t	C	t	t	t	t	t	t	C	C	t	t	t	t	cds813;Name=YP_008637708.1;Parent=gene869;Dbxref=Genbank:YP_008637708.1,GeneID:17152911;gbkey=CDS;gene=lptD;product=Probable LPS transport and assembly outer membrane component LptD;protein_id=YP_008637708.1;transl_table=11 Probable LPS transport and assembly outer membrane component LptD (1010116-1012554 -)	non-silent atc -> Gtc;	1713 2064 556 557
NC_022541.1	1011358	g	g	g	g	g	g	g	g	g	g	g	g	C	g	C	g	g	g	g	g	g	C	C	g	g	g	g	cds813;Name=YP_008637708.1;Parent=gene869;Dbxref=Genbank:YP_008637708.1,GeneID:17152911;gbkey=CDS;gene=lptD;product=Probable LPS transport and assembly outer membrane component LptD;protein_id=YP_008637708.1;transl_table=11 Probable LPS transport and assembly outer membrane component LptD (1010116-1012554 -)	silent gcc -> gcG;	1713 2064 556 557
NC_022541.1	101136	c	c	c	A	c	c	A	c	c	A	c	A	c	A	c	A	c	A	A	c	c	c	c	c	c	c	A			1138 1420 1646 1680 1811 220 301 3035 XCP123
NC_022541.1	1011373	c	c	c	c	c	c	c	c	c	c	c	c	A	c	A	c	c	c	c	c	c	A	A	c	c	c	c	cds813;Name=YP_008637708.1;Parent=gene869;Dbxref=Genbank:YP_008637708.1,GeneID:17152911;gbkey=CDS;gene=lptD;product=Probable LPS transport and assembly outer membrane component LptD;protein_id=YP_008637708.1;transl_table=11 Probable LPS transport and assembly outer membrane component LptD (1010116-1012554 -)	silent ctg -> ctT;	1713 2064 556 557
NC_022541.1	1011375	g	g	g	g	g	g	g	g	g	g	g	g	A	g	A	g	g	g	g	g	g	A	A	g	g	g	g	cds813;Name=YP_008637708.1;Parent=gene869;Dbxref=Genbank:YP_008637708.1,GeneID:17152911;gbkey=CDS;gene=lptD;product=Probable LPS transport and assembly outer membrane component LptD;protein_id=YP_008637708.1;transl_table=11 Probable LPS transport and assembly outer membrane component LptD (1010116-1012554 -)	silent ctg -> Ttg;	1713 2064 556 557
NC_022541.1	1011400	a	a	a	a	a	a	a	a	a	a	a	a	G	a	G	a	a	a	a	a	a	G	G	a	a	a	a	cds813;Name=YP_008637708.1;Parent=gene869;Dbxref=Genbank:YP_008637708.1,GeneID:17152911;gbkey=CDS;gene=lptD;product=Probable LPS transport and assembly outer membrane component LptD;protein_id=YP_008637708.1;transl_table=11 Probable LPS transport and assembly outer membrane component LptD (1010116-1012554 -)	silent cgt -> cgC;	1713 2064 556 557
NC_022541.1	101144	g	g	g	T	g	g	T	g	g	T	g	T	g	T	g	T	g	T	T	g	g	g	g	g	g	g	T			1138 1420 1646 1680 1811 220 301 3035 XCP123
NC_022541.1	101145	t	t	t	G	t	t	G	t	t	G	t	G	t	G	t	G	t	G	G	t	t	t	t	t	t	t	G			1138 1420 1646 1680 1811 220 301 3035 XCP123
NC_022541.1	1011520	c	c	c	c	c	c	c	c	c	c	c	c	T	c	T	c	c	c	c	c	c	T	T	c	c	c	c	cds813;Name=YP_008637708.1;Parent=gene869;Dbxref=Genbank:YP_008637708.1,GeneID:17152911;gbkey=CDS;gene=lptD;product=Probable LPS transport and assembly outer membrane component LptD;protein_id=YP_008637708.1;transl_table=11 Probable LPS transport and assembly outer membrane component LptD (1010116-1012554 -)	silent cag -> caA;	1713 2064 556 557
NC_022541.1	1011526	g	g	g	g	g	g	g	g	g	g	g	g	A	g	A	g	g	g	g	g	g	A	A	g	g	g	g	cds813;Name=YP_008637708.1;Parent=gene869;Dbxref=Genbank:YP_008637708.1,GeneID:17152911;gbkey=CDS;gene=lptD;product=Probable LPS transport and assembly outer membrane component LptD;protein_id=YP_008637708.1;transl_table=11 Probable LPS transport and assembly outer membrane component LptD (1010116-1012554 -)	silent agc -> agT;	1713 2064 556 557
NC_022541.1	1011541	g	g	g	g	g	g	g	g	g	g	g	g	C	g	C	g	g	g	g	g	g	C	C	g	g	g	g	cds813;Name=YP_008637708.1;Parent=gene869;Dbxref=Genbank:YP_008637708.1,GeneID:17152911;gbkey=CDS;gene=lptD;product=Probable LPS transport and assembly outer membrane component LptD;protein_id=YP_008637708.1;transl_table=11 Probable LPS transport and assembly outer membrane component LptD (1010116-1012554 -)	non-silent atc -> atG;	1713 2064 556 557
NC_022541.1	1011553	a	a	a	G	a	a	G	a	a	G	a	G	a	G	a	G	a	G	G	a	a	a	a	a	a	a	G	cds813;Name=YP_008637708.1;Parent=gene869;Dbxref=Genbank:YP_008637708.1,GeneID:17152911;gbkey=CDS;gene=lptD;product=Probable LPS transport and assembly outer membrane component LptD;protein_id=YP_008637708.1;transl_table=11 Probable LPS transport and assembly outer membrane component LptD (1010116-1012554 -)	silent cgt -> cgC;	1138 1420 1646 1680 1811 220 301 3035 XCP123
NC_022541.1	1011556	g	g	g	A	g	g	A	g	g	A	g	A	g	A	g	A	g	A	A	g	g	g	g	g	g	g	A	cds813;Name=YP_008637708.1;Parent=gene869;Dbxref=Genbank:YP_008637708.1,GeneID:17152911;gbkey=CDS;gene=lptD;product=Probable LPS transport and assembly outer membrane component LptD;protein_id=YP_008637708.1;transl_table=11 Probable LPS transport and assembly outer membrane component LptD (1010116-1012554 -)	silent agc -> agT;	1138 1420 1646 1680 1811 220 301 3035 XCP123
NC_022541.1	1011565	g	g	g	g	g	g	g	g	g	g	g	g	A	g	A	g	g	g	g	g	g	A	A	g	g	g	g	cds813;Name=YP_008637708.1;Parent=gene869;Dbxref=Genbank:YP_008637708.1,GeneID:17152911;gbkey=CDS;gene=lptD;product=Probable LPS transport and assembly outer membrane component LptD;protein_id=YP_008637708.1;transl_table=11 Probable LPS transport and assembly outer membrane component LptD (1010116-1012554 -)	silent gac -> gaT;	1713 2064 556 557
NC_022541.1	1011568	c	c	c	c	c	c	c	c	c	c	c	c	T	c	T	c	c	c	c	c	c	T	T	c	c	c	c	cds813;Name=YP_008637708.1;Parent=gene869;Dbxref=Genbank:YP_008637708.1,GeneID:17152911;gbkey=CDS;gene=lptD;product=Probable LPS transport and assembly outer membrane component LptD;protein_id=YP_008637708.1;transl_table=11 Probable LPS transport and assembly outer membrane component LptD (1010116-1012554 -)	silent gag -> gaA;	1713 2064 556 557
NC_022541.1	1011574	a	a	a	a	a	a	a	a	a	a	a	a	G	a	G	a	a	a	a	a	a	G	G	a	a	a	a	cds813;Name=YP_008637708.1;Parent=gene869;Dbxref=Genbank:YP_008637708.1,GeneID:17152911;gbkey=CDS;gene=lptD;product=Probable LPS transport and assembly outer membrane component LptD;protein_id=YP_008637708.1;transl_table=11 Probable LPS transport and assembly outer membrane component LptD (1010116-1012554 -)	silent tat -> taC;	1713 2064 556 557
NC_022541.1	1011586	g	g	g	g	g	g	g	g	g	g	g	g	A	g	g	g	g	g	g	g	g	g	g	g	g	g	g	cds813;Name=YP_008637708.1;Parent=gene869;Dbxref=Genbank:YP_008637708.1,GeneID:17152911;gbkey=CDS;gene=lptD;product=Probable LPS transport and assembly outer membrane component LptD;protein_id=YP_008637708.1;transl_table=11 Probable LPS transport and assembly outer membrane component LptD (1010116-1012554 -)	silent agc -> agT;	1713
NC_022541.1	1011598	a	a	a	a	a	a	a	a	a	a	a	a	G	a	G	a	a	a	a	a	a	G	G	a	a	a	a	cds813;Name=YP_008637708.1;Parent=gene869;Dbxref=Genbank:YP_008637708.1,GeneID:17152911;gbkey=CDS;gene=lptD;product=Probable LPS transport and assembly outer membrane component LptD;protein_id=YP_008637708.1;transl_table=11 Probable LPS transport and assembly outer membrane component LptD (1010116-1012554 -)	silent att -> atC;	1713 2064 556 557
NC_022541.1	101160	c	c	c	T	c	c	T	c	c	T	c	T	c	T	c	T	c	T	T	c	c	c	c	c	c	c	T			1138 1420 1646 1680 1811 220 301 3035 XCP123
NC_022541.1	1011619	a	a	a	a	a	a	a	a	a	a	a	a	G	a	G	a	a	a	a	a	a	G	G	a	a	a	a	cds813;Name=YP_008637708.1;Parent=gene869;Dbxref=Genbank:YP_008637708.1,GeneID:17152911;gbkey=CDS;gene=lptD;product=Probable LPS transport and assembly outer membrane component LptD;protein_id=YP_008637708.1;transl_table=11 Probable LPS transport and assembly outer membrane component LptD (1010116-1012554 -)	silent aat -> aaC;	1713 2064 556 557
NC_022541.1	101162	t	t	t	G	t	t	G	t	t	G	t	G	t	G	t	G	t	G	G	t	t	t	t	t	t	t	G			1138 1420 1646 1680 1811 220 301 3035 XCP123
NC_022541.1	1011621	t	t	t	t	t	t	t	t	t	t	t	t	G	t	G	t	t	t	t	t	t	G	G	t	t	t	t	cds813;Name=YP_008637708.1;Parent=gene869;Dbxref=Genbank:YP_008637708.1,GeneID:17152911;gbkey=CDS;gene=lptD;product=Probable LPS transport and assembly outer membrane component LptD;protein_id=YP_008637708.1;transl_table=11 Probable LPS transport and assembly outer membrane component LptD (1010116-1012554 -)	non-silent aat -> Cat;	1713 2064 556 557
NC_022541.1	1011623	c	c	c	c	c	c	c	c	c	c	c	c	G	c	G	c	c	c	c	c	c	G	G	c	c	c	c	cds813;Name=YP_008637708.1;Parent=gene869;Dbxref=Genbank:YP_008637708.1,GeneID:17152911;gbkey=CDS;gene=lptD;product=Probable LPS transport and assembly outer membrane component LptD;protein_id=YP_008637708.1;transl_table=11 Probable LPS transport and assembly outer membrane component LptD (1010116-1012554 -)	non-silent agc -> aCc;	1713 2064 556 557
NC_022541.1	1011661	a	a	a	a	a	a	a	a	a	a	a	a	G	a	G	a	a	a	a	a	a	G	G	a	a	a	a	cds813;Name=YP_008637708.1;Parent=gene869;Dbxref=Genbank:YP_008637708.1,GeneID:17152911;gbkey=CDS;gene=lptD;product=Probable LPS transport and assembly outer membrane component LptD;protein_id=YP_008637708.1;transl_table=11 Probable LPS transport and assembly outer membrane component LptD (1010116-1012554 -)	silent cgt -> cgC;	1713 2064 556 557
NC_022541.1	1011700	c	c	c	c	c	c	c	c	c	c	c	c	G	c	G	c	c	c	c	c	c	G	G	c	c	c	c	cds813;Name=YP_008637708.1;Parent=gene869;Dbxref=Genbank:YP_008637708.1,GeneID:17152911;gbkey=CDS;gene=lptD;product=Probable LPS transport and assembly outer membrane component LptD;protein_id=YP_008637708.1;transl_table=11 Probable LPS transport and assembly outer membrane component LptD (1010116-1012554 -)	silent ggg -> ggC;	1713 2064 556 557
NC_022541.1	1011724	c	c	c	c	c	c	c	c	c	c	c	c	T	c	T	c	c	c	c	c	c	T	T	c	c	c	c	cds813;Name=YP_008637708.1;Parent=gene869;Dbxref=Genbank:YP_008637708.1,GeneID:17152911;gbkey=CDS;gene=lptD;product=Probable LPS transport and assembly outer membrane component LptD;protein_id=YP_008637708.1;transl_table=11 Probable LPS transport and assembly outer membrane component LptD (1010116-1012554 -)	silent gag -> gaA;	1713 2064 556 557
NC_022541.1	1011736	g	g	g	g	g	g	g	g	g	g	g	g	A	g	A	g	g	g	g	g	g	A	A	g	g	g	g	cds813;Name=YP_008637708.1;Parent=gene869;Dbxref=Genbank:YP_008637708.1,GeneID:17152911;gbkey=CDS;gene=lptD;product=Probable LPS transport and assembly outer membrane component LptD;protein_id=YP_008637708.1;transl_table=11 Probable LPS transport and assembly outer membrane component LptD (1010116-1012554 -)	silent cgc -> cgT;	1713 2064 556 557
NC_022541.1	1011778	a	a	a	a	a	a	a	a	a	a	a	a	G	a	G	a	a	a	a	a	a	G	G	a	a	a	a	cds813;Name=YP_008637708.1;Parent=gene869;Dbxref=Genbank:YP_008637708.1,GeneID:17152911;gbkey=CDS;gene=lptD;product=Probable LPS transport and assembly outer membrane component LptD;protein_id=YP_008637708.1;transl_table=11 Probable LPS transport and assembly outer membrane component LptD (1010116-1012554 -)	silent cgt -> cgC;	1713 2064 556 557
NC_022541.1	1011786	a	a	a	a	a	a	a	a	a	a	a	a	G	a	G	a	a	a	a	a	a	G	G	a	a	a	a	cds813;Name=YP_008637708.1;Parent=gene869;Dbxref=Genbank:YP_008637708.1,GeneID:17152911;gbkey=CDS;gene=lptD;product=Probable LPS transport and assembly outer membrane component LptD;protein_id=YP_008637708.1;transl_table=11 Probable LPS transport and assembly outer membrane component LptD (1010116-1012554 -)	silent ttg -> Ctg;	1713 2064 556 557
NC_022541.1	1011796	a	a	a	G	a	a	G	a	a	G	a	G	G	G	G	G	a	G	G	a	a	G	G	a	a	a	G	cds813;Name=YP_008637708.1;Parent=gene869;Dbxref=Genbank:YP_008637708.1,GeneID:17152911;gbkey=CDS;gene=lptD;product=Probable LPS transport and assembly outer membrane component LptD;protein_id=YP_008637708.1;transl_table=11 Probable LPS transport and assembly outer membrane component LptD (1010116-1012554 -)	silent gat -> gaC;	1138 1420 1646 1680 1713 1811 2064 220 301 3035 556 557 XCP123
NC_022541.1	1011850	a	a	a	a	a	a	a	a	a	a	a	a	G	a	G	a	a	a	a	a	a	G	G	a	a	a	a	cds813;Name=YP_008637708.1;Parent=gene869;Dbxref=Genbank:YP_008637708.1,GeneID:17152911;gbkey=CDS;gene=lptD;product=Probable LPS transport and assembly outer membrane component LptD;protein_id=YP_008637708.1;transl_table=11 Probable LPS transport and assembly outer membrane component LptD (1010116-1012554 -)	silent cgt -> cgC;	1713 2064 556 557
NC_022541.1	1011853	g	g	g	g	g	g	g	g	g	g	g	g	A	g	A	g	g	g	g	g	g	A	A	g	g	g	g	cds813;Name=YP_008637708.1;Parent=gene869;Dbxref=Genbank:YP_008637708.1,GeneID:17152911;gbkey=CDS;gene=lptD;product=Probable LPS transport and assembly outer membrane component LptD;protein_id=YP_008637708.1;transl_table=11 Probable LPS transport and assembly outer membrane component LptD (1010116-1012554 -)	silent ggc -> ggT;	1713 2064 556 557
NC_022541.1	1011861	g	g	g	g	g	g	g	g	g	g	g	g	A	g	A	g	g	g	g	g	g	A	A	g	g	g	g	cds813;Name=YP_008637708.1;Parent=gene869;Dbxref=Genbank:YP_008637708.1,GeneID:17152911;gbkey=CDS;gene=lptD;product=Probable LPS transport and assembly outer membrane component LptD;protein_id=YP_008637708.1;transl_table=11 Probable LPS transport and assembly outer membrane component LptD (1010116-1012554 -)	silent ctg -> Ttg;	1713 2064 556 557
NC_022541.1	1011862	g	g	g	g	g	g	g	g	g	g	g	g	C	g	C	g	g	g	g	g	g	C	C	g	g	g	g	cds813;Name=YP_008637708.1;Parent=gene869;Dbxref=Genbank:YP_008637708.1,GeneID:17152911;gbkey=CDS;gene=lptD;product=Probable LPS transport and assembly outer membrane component LptD;protein_id=YP_008637708.1;transl_table=11 Probable LPS transport and assembly outer membrane component LptD (1010116-1012554 -)	silent ggc -> ggG;	1713 2064 556 557
NC_022541.1	1011892	g	g	g	g	g	g	g	g	g	g	g	g	C	g	C	g	g	g	g	g	g	C	C	g	g	g	g	cds813;Name=YP_008637708.1;Parent=gene869;Dbxref=Genbank:YP_008637708.1,GeneID:17152911;gbkey=CDS;gene=lptD;product=Probable LPS transport and assembly outer membrane component LptD;protein_id=YP_008637708.1;transl_table=11 Probable LPS transport and assembly outer membrane component LptD (1010116-1012554 -)	silent cgc -> cgG;	1713 2064 556 557
NC_022541.1	1011895	g	g	g	g	g	g	g	g	g	g	g	g	C	g	C	g	g	g	g	g	g	C	C	g	g	g	g	cds813;Name=YP_008637708.1;Parent=gene869;Dbxref=Genbank:YP_008637708.1,GeneID:17152911;gbkey=CDS;gene=lptD;product=Probable LPS transport and assembly outer membrane component LptD;protein_id=YP_008637708.1;transl_table=11 Probable LPS transport and assembly outer membrane component LptD (1010116-1012554 -)	silent cgc -> cgG;	1713 2064 556 557
NC_022541.1	1011907	c	c	c	c	c	c	c	c	c	c	c	c	G	c	G	c	c	c	c	c	c	G	G	c	c	c	c	cds813;Name=YP_008637708.1;Parent=gene869;Dbxref=Genbank:YP_008637708.1,GeneID:17152911;gbkey=CDS;gene=lptD;product=Probable LPS transport and assembly outer membrane component LptD;protein_id=YP_008637708.1;transl_table=11 Probable LPS transport and assembly outer membrane component LptD (1010116-1012554 -)	silent ccg -> ccC;	1713 2064 556 557
NC_022541.1	1011967	g	g	g	A	g	g	A	g	g	A	g	A	g	A	g	A	g	A	A	g	g	g	g	g	g	g	A	cds813;Name=YP_008637708.1;Parent=gene869;Dbxref=Genbank:YP_008637708.1,GeneID:17152911;gbkey=CDS;gene=lptD;product=Probable LPS transport and assembly outer membrane component LptD;protein_id=YP_008637708.1;transl_table=11 Probable LPS transport and assembly outer membrane component LptD (1010116-1012554 -)	silent cgc -> cgT;	1138 1420 1646 1680 1811 220 301 3035 XCP123
NC_022541.1	1011970	c	c	c	c	c	c	c	c	c	c	c	c	T	c	T	c	c	c	c	c	c	T	T	c	c	c	c	cds813;Name=YP_008637708.1;Parent=gene869;Dbxref=Genbank:YP_008637708.1,GeneID:17152911;gbkey=CDS;gene=lptD;product=Probable LPS transport and assembly outer membrane component LptD;protein_id=YP_008637708.1;transl_table=11 Probable LPS transport and assembly outer membrane component LptD (1010116-1012554 -)	silent gcg -> gcA;	1713 2064 556 557
NC_022541.1	1011973	g	g	g	g	g	g	g	g	g	g	g	g	A	g	A	g	g	g	g	g	g	A	A	g	g	g	g	cds813;Name=YP_008637708.1;Parent=gene869;Dbxref=Genbank:YP_008637708.1,GeneID:17152911;gbkey=CDS;gene=lptD;product=Probable LPS transport and assembly outer membrane component LptD;protein_id=YP_008637708.1;transl_table=11 Probable LPS transport and assembly outer membrane component LptD (1010116-1012554 -)	silent acc -> acT;	1713 2064 556 557
NC_022541.1	1011976	a	a	a	a	a	a	a	a	a	a	a	a	G	a	G	a	a	a	a	a	a	G	G	a	a	a	a	cds813;Name=YP_008637708.1;Parent=gene869;Dbxref=Genbank:YP_008637708.1,GeneID:17152911;gbkey=CDS;gene=lptD;product=Probable LPS transport and assembly outer membrane component LptD;protein_id=YP_008637708.1;transl_table=11 Probable LPS transport and assembly outer membrane component LptD (1010116-1012554 -)	silent ggt -> ggC;	1713 2064 556 557
NC_022541.1	1011988	c	c	c	c	c	c	c	c	c	c	c	c	T	c	T	c	c	c	c	c	c	T	T	c	c	c	c	cds813;Name=YP_008637708.1;Parent=gene869;Dbxref=Genbank:YP_008637708.1,GeneID:17152911;gbkey=CDS;gene=lptD;product=Probable LPS transport and assembly outer membrane component LptD;protein_id=YP_008637708.1;transl_table=11 Probable LPS transport and assembly outer membrane component LptD (1010116-1012554 -)	silent gag -> gaA;	1713 2064 556 557
NC_022541.1	1012009	c	c	c	c	c	c	c	c	c	c	c	c	G	c	G	c	c	c	c	c	c	G	G	c	c	c	c	cds813;Name=YP_008637708.1;Parent=gene869;Dbxref=Genbank:YP_008637708.1,GeneID:17152911;gbkey=CDS;gene=lptD;product=Probable LPS transport and assembly outer membrane component LptD;protein_id=YP_008637708.1;transl_table=11 Probable LPS transport and assembly outer membrane component LptD (1010116-1012554 -)	silent ccg -> ccC;	1713 2064 556 557
NC_022541.1	1012018	c	c	c	c	c	c	c	c	c	c	c	c	A	c	A	c	c	c	c	c	c	A	A	c	c	c	c	cds813;Name=YP_008637708.1;Parent=gene869;Dbxref=Genbank:YP_008637708.1,GeneID:17152911;gbkey=CDS;gene=lptD;product=Probable LPS transport and assembly outer membrane component LptD;protein_id=YP_008637708.1;transl_table=11 Probable LPS transport and assembly outer membrane component LptD (1010116-1012554 -)	silent gtg -> gtT;	1713 2064 556 557
NC_022541.1	1012057	g	g	g	g	g	g	g	g	g	g	g	g	C	g	C	g	g	g	g	g	g	C	C	g	g	g	g	cds813;Name=YP_008637708.1;Parent=gene869;Dbxref=Genbank:YP_008637708.1,GeneID:17152911;gbkey=CDS;gene=lptD;product=Probable LPS transport and assembly outer membrane component LptD;protein_id=YP_008637708.1;transl_table=11 Probable LPS transport and assembly outer membrane component LptD (1010116-1012554 -)	silent acc -> acG;	1713 2064 556 557
NC_022541.1	1012072	c	c	c	c	c	c	c	c	c	c	c	c	T	c	T	c	c	c	c	c	c	T	T	c	c	c	c	cds813;Name=YP_008637708.1;Parent=gene869;Dbxref=Genbank:YP_008637708.1,GeneID:17152911;gbkey=CDS;gene=lptD;product=Probable LPS transport and assembly outer membrane component LptD;protein_id=YP_008637708.1;transl_table=11 Probable LPS transport and assembly outer membrane component LptD (1010116-1012554 -)	silent cag -> caA;	1713 2064 556 557
NC_022541.1	1012198	c	c	c	c	c	c	c	c	c	c	c	c	G	c	G	c	c	c	c	c	c	G	G	c	c	c	c	cds813;Name=YP_008637708.1;Parent=gene869;Dbxref=Genbank:YP_008637708.1,GeneID:17152911;gbkey=CDS;gene=lptD;product=Probable LPS transport and assembly outer membrane component LptD;protein_id=YP_008637708.1;transl_table=11 Probable LPS transport and assembly outer membrane component LptD (1010116-1012554 -)	silent gtg -> gtC;	1713 2064 556 557
NC_022541.1	1012210	c	c	c	c	c	c	c	c	c	c	c	c	A	c	A	c	c	c	c	c	c	A	A	c	c	c	c	cds813;Name=YP_008637708.1;Parent=gene869;Dbxref=Genbank:YP_008637708.1,GeneID:17152911;gbkey=CDS;gene=lptD;product=Probable LPS transport and assembly outer membrane component LptD;protein_id=YP_008637708.1;transl_table=11 Probable LPS transport and assembly outer membrane component LptD (1010116-1012554 -)	silent tcg -> tcT;	1713 2064 556 557
NC_022541.1	1012225	c	c	c	c	c	c	c	c	c	c	c	c	G	c	G	c	c	c	c	c	c	G	G	c	c	c	c	cds813;Name=YP_008637708.1;Parent=gene869;Dbxref=Genbank:YP_008637708.1,GeneID:17152911;gbkey=CDS;gene=lptD;product=Probable LPS transport and assembly outer membrane component LptD;protein_id=YP_008637708.1;transl_table=11 Probable LPS transport and assembly outer membrane component LptD (1010116-1012554 -)	silent cgg -> cgC;	1713 2064 556 557
NC_022541.1	1012255	g	g	g	g	g	g	g	g	g	g	g	g	C	g	C	g	g	g	g	g	g	C	C	g	g	g	g	cds813;Name=YP_008637708.1;Parent=gene869;Dbxref=Genbank:YP_008637708.1,GeneID:17152911;gbkey=CDS;gene=lptD;product=Probable LPS transport and assembly outer membrane component LptD;protein_id=YP_008637708.1;transl_table=11 Probable LPS transport and assembly outer membrane component LptD (1010116-1012554 -)	silent acc -> acG;	1713 2064 556 557
NC_022541.1	1012312	t	t	t	C	t	t	C	t	t	C	t	C	C	C	C	C	t	C	C	t	t	C	C	t	t	t	C	cds813;Name=YP_008637708.1;Parent=gene869;Dbxref=Genbank:YP_008637708.1,GeneID:17152911;gbkey=CDS;gene=lptD;product=Probable LPS transport and assembly outer membrane component LptD;protein_id=YP_008637708.1;transl_table=11 Probable LPS transport and assembly outer membrane component LptD (1010116-1012554 -)	silent gca -> gcG;	1138 1420 1646 1680 1713 1811 2064 220 301 3035 556 557 XCP123
NC_022541.1	1012315	g	g	g	g	g	g	g	g	g	g	g	g	A	g	A	g	g	g	g	g	g	A	A	g	g	g	g	cds813;Name=YP_008637708.1;Parent=gene869;Dbxref=Genbank:YP_008637708.1,GeneID:17152911;gbkey=CDS;gene=lptD;product=Probable LPS transport and assembly outer membrane component LptD;protein_id=YP_008637708.1;transl_table=11 Probable LPS transport and assembly outer membrane component LptD (1010116-1012554 -)	silent gtc -> gtT;	1713 2064 556 557
NC_022541.1	1012324	t	t	t	C	t	t	C	t	t	C	t	C	t	C	t	C	t	C	C	t	t	t	t	t	t	t	C	cds813;Name=YP_008637708.1;Parent=gene869;Dbxref=Genbank:YP_008637708.1,GeneID:17152911;gbkey=CDS;gene=lptD;product=Probable LPS transport and assembly outer membrane component LptD;protein_id=YP_008637708.1;transl_table=11 Probable LPS transport and assembly outer membrane component LptD (1010116-1012554 -)	silent caa -> caG;	1138 1420 1646 1680 1811 220 301 3035 XCP123
NC_022541.1	1012371	c	c	c	c	c	c	c	c	c	c	c	c	T	c	T	c	c	c	c	c	c	T	T	c	c	c	c	cds813;Name=YP_008637708.1;Parent=gene869;Dbxref=Genbank:YP_008637708.1,GeneID:17152911;gbkey=CDS;gene=lptD;product=Probable LPS transport and assembly outer membrane component LptD;protein_id=YP_008637708.1;transl_table=11 Probable LPS transport and assembly outer membrane component LptD (1010116-1012554 -)	non-silent gtc -> Atc;	1713 2064 556 557
NC_022541.1	1012396	c	c	c	c	c	c	c	c	c	c	c	c	T	c	T	c	c	c	c	c	c	T	T	c	c	c	c	cds813;Name=YP_008637708.1;Parent=gene869;Dbxref=Genbank:YP_008637708.1,GeneID:17152911;gbkey=CDS;gene=lptD;product=Probable LPS transport and assembly outer membrane component LptD;protein_id=YP_008637708.1;transl_table=11 Probable LPS transport and assembly outer membrane component LptD (1010116-1012554 -)	silent gag -> gaA;	1713 2064 556 557
NC_022541.1	1012420	g	g	g	g	g	g	g	g	g	g	g	g	A	g	A	g	g	g	g	g	g	A	A	g	g	g	g	cds813;Name=YP_008637708.1;Parent=gene869;Dbxref=Genbank:YP_008637708.1,GeneID:17152911;gbkey=CDS;gene=lptD;product=Probable LPS transport and assembly outer membrane component LptD;protein_id=YP_008637708.1;transl_table=11 Probable LPS transport and assembly outer membrane component LptD (1010116-1012554 -)	silent ccc -> ccT;	1713 2064 556 557
NC_022541.1	1012534	c	c	c	A	c	c	A	c	c	A	c	A	c	A	c	A	c	A	A	c	c	c	c	c	c	c	A	cds813;Name=YP_008637708.1;Parent=gene869;Dbxref=Genbank:YP_008637708.1,GeneID:17152911;gbkey=CDS;gene=lptD;product=Probable LPS transport and assembly outer membrane component LptD;protein_id=YP_008637708.1;transl_table=11 Probable LPS transport and assembly outer membrane component LptD (1010116-1012554 -)	silent ctg -> ctT;	1138 1420 1646 1680 1811 220 301 3035 XCP123
NC_022541.1	1012633	a	a	a	T	a	a	T	a	a	T	a	T	T	T	T	T	a	T	T	a	a	T	T	a	a	a	T			1138 1420 1646 1680 1713 1811 2064 220 301 3035 556 557 XCP123
NC_022541.1	1012650	a	a	a	a	a	a	a	a	a	a	a	a	C	a	C	a	a	a	a	a	a	C	C	a	a	a	a			1713 2064 556 557
NC_022541.1	1012651	c	c	c	c	c	c	c	c	c	c	c	c	A	c	A	c	c	c	c	c	c	A	A	c	c	c	c			1713 2064 556 557
NC_022541.1	1012652	t	t	t	C	t	t	C	t	t	C	t	C	C	C	C	C	t	C	C	t	t	C	C	t	t	t	C			1138 1420 1646 1680 1713 1811 2064 220 301 3035 556 557 XCP123
NC_022541.1	1012658	a	a	a	a	a	a	a	a	a	a	a	a	G	a	G	a	a	a	a	a	a	G	G	a	a	a	a			1713 2064 556 557
NC_022541.1	1012673	t	t	t	t	t	t	t	t	t	t	t	t	C	t	C	t	t	t	t	t	t	C	C	t	t	t	t			1713 2064 556 557
NC_022541.1	1012746	t	t	t	t	t	t	t	t	t	t	t	t	C	t	C	t	t	t	t	t	t	C	C	t	t	t	t			1713 2064 556 557
NC_022541.1	1012753	a	a	a	a	a	a	a	a	a	a	a	a	a	a	a	a	a	a	a	a	G	a	a	a	a	a	a			381
NC_022541.1	10132	g	g	g	g	g	g	g	g	g	g	g	g	A	g	A	g	g	g	g	g	g	A	A	g	g	g	g	cds6;Name=YP_008636901.1;Parent=gene6;Dbxref=Genbank:YP_008636901.1,GeneID:17148936;gbkey=CDS;product=hypothetical protein;protein_id=YP_008636901.1;transl_table=11 hypothetical protein (9578-10771 +)	silent aag -> aaA;	1713 2064 556 557
NC_022541.1	1013931	g	g	g	g	g	g	g	g	g	g	g	g	T	g	T	g	g	g	g	g	g	T	T	g	g	g	g	cds814;Name=YP_008637709.1;Parent=gene871;Dbxref=Genbank:YP_008637709.1,GeneID:17149501;gbkey=CDS;product=putative histone deacetylase superfamily protein;protein_id=YP_008637709.1;transl_table=11 putative histone deacetylase superfamily protein (1013750-1014697 -)	non-silent gcc -> gAc;	1713 2064 556 557
NC_022541.1	1013957	c	c	c	c	c	c	c	c	c	c	c	c	T	c	T	c	c	c	c	c	c	T	T	c	c	c	c	cds814;Name=YP_008637709.1;Parent=gene871;Dbxref=Genbank:YP_008637709.1,GeneID:17149501;gbkey=CDS;product=putative histone deacetylase superfamily protein;protein_id=YP_008637709.1;transl_table=11 putative histone deacetylase superfamily protein (1013750-1014697 -)	silent ccg -> ccA;	1713 2064 556 557
NC_022541.1	1013972	c	c	c	c	c	c	c	c	c	c	c	c	T	c	T	c	c	c	c	c	c	T	T	c	c	c	c	cds814;Name=YP_008637709.1;Parent=gene871;Dbxref=Genbank:YP_008637709.1,GeneID:17149501;gbkey=CDS;product=putative histone deacetylase superfamily protein;protein_id=YP_008637709.1;transl_table=11 putative histone deacetylase superfamily protein (1013750-1014697 -)	silent gcg -> gcA;	1713 2064 556 557
NC_022541.1	1014022	t	t	t	t	t	t	t	t	t	t	t	t	C	t	C	t	t	t	t	t	t	C	C	t	t	t	t	cds814;Name=YP_008637709.1;Parent=gene871;Dbxref=Genbank:YP_008637709.1,GeneID:17149501;gbkey=CDS;product=putative histone deacetylase superfamily protein;protein_id=YP_008637709.1;transl_table=11 putative histone deacetylase superfamily protein (1013750-1014697 -)	non-silent atc -> Gtc;	1713 2064 556 557
NC_022541.1	1014065	c	c	c	c	c	c	c	c	c	c	c	c	T	c	T	c	c	c	c	c	c	T	T	c	c	c	c	cds814;Name=YP_008637709.1;Parent=gene871;Dbxref=Genbank:YP_008637709.1,GeneID:17149501;gbkey=CDS;product=putative histone deacetylase superfamily protein;protein_id=YP_008637709.1;transl_table=11 putative histone deacetylase superfamily protein (1013750-1014697 -)	silent ggg -> ggA;	1713 2064 556 557
NC_022541.1	1014068	g	g	g	g	g	g	g	g	g	g	g	g	A	g	A	g	g	g	g	g	g	A	A	g	g	g	g	cds814;Name=YP_008637709.1;Parent=gene871;Dbxref=Genbank:YP_008637709.1,GeneID:17149501;gbkey=CDS;product=putative histone deacetylase superfamily protein;protein_id=YP_008637709.1;transl_table=11 putative histone deacetylase superfamily protein (1013750-1014697 -)	silent gac -> gaT;	1713 2064 556 557
NC_022541.1	1014095	a	a	a	a	a	a	a	a	a	a	a	a	G	a	G	a	a	a	a	a	a	G	G	a	a	a	a	cds814;Name=YP_008637709.1;Parent=gene871;Dbxref=Genbank:YP_008637709.1,GeneID:17149501;gbkey=CDS;product=putative histone deacetylase superfamily protein;protein_id=YP_008637709.1;transl_table=11 putative histone deacetylase superfamily protein (1013750-1014697 -)	silent cat -> caC;	1713 2064 556 557
NC_022541.1	101411	a	a	a	a	a	a	a	a	a	a	a	a	a	a	a	a	a	a	a	a	a	a	a	a	a	a	T			XCP123
NC_022541.1	1014122	c	c	c	c	c	c	c	c	c	c	c	c	G	c	G	c	c	c	c	c	c	G	G	c	c	c	c	cds814;Name=YP_008637709.1;Parent=gene871;Dbxref=Genbank:YP_008637709.1,GeneID:17149501;gbkey=CDS;product=putative histone deacetylase superfamily protein;protein_id=YP_008637709.1;transl_table=11 putative histone deacetylase superfamily protein (1013750-1014697 -)	silent gtg -> gtC;	1713 2064 556 557
NC_022541.1	101416	c	c	c	c	c	c	c	c	c	c	c	c	T	c	T	c	c	c	c	c	c	T	T	c	c	c	c			1713 2064 556 557
NC_022541.1	1014204	g	g	g	A	g	g	A	g	g	A	g	A	g	A	g	A	g	A	A	g	g	g	g	g	g	g	A	cds814;Name=YP_008637709.1;Parent=gene871;Dbxref=Genbank:YP_008637709.1,GeneID:17149501;gbkey=CDS;product=putative histone deacetylase superfamily protein;protein_id=YP_008637709.1;transl_table=11 putative histone deacetylase superfamily protein (1013750-1014697 -)	non-silent acc -> aTc;	1138 1420 1646 1680 1811 220 301 3035 XCP123
NC_022541.1	1014230	g	g	g	g	g	g	g	g	g	g	g	g	A	g	A	g	g	g	g	g	g	A	A	g	g	g	g	cds814;Name=YP_008637709.1;Parent=gene871;Dbxref=Genbank:YP_008637709.1,GeneID:17149501;gbkey=CDS;product=putative histone deacetylase superfamily protein;protein_id=YP_008637709.1;transl_table=11 putative histone deacetylase superfamily protein (1013750-1014697 -)	silent gac -> gaT;	1713 2064 556 557
NC_022541.1	1014248	t	t	t	t	t	t	t	t	t	t	t	t	C	t	C	t	t	t	t	t	t	C	C	t	t	t	t	cds814;Name=YP_008637709.1;Parent=gene871;Dbxref=Genbank:YP_008637709.1,GeneID:17149501;gbkey=CDS;product=putative histone deacetylase superfamily protein;protein_id=YP_008637709.1;transl_table=11 putative histone deacetylase superfamily protein (1013750-1014697 -)	silent gaa -> gaG;	1713 2064 556 557
NC_022541.1	1014401	c	c	c	c	c	c	c	c	c	c	c	c	G	c	G	c	c	c	c	c	c	G	G	c	c	c	c	cds814;Name=YP_008637709.1;Parent=gene871;Dbxref=Genbank:YP_008637709.1,GeneID:17149501;gbkey=CDS;product=putative histone deacetylase superfamily protein;protein_id=YP_008637709.1;transl_table=11 putative histone deacetylase superfamily protein (1013750-1014697 -)	silent gcg -> gcC;	1713 2064 556 557
NC_022541.1	1014410	g	g	g	g	g	g	g	g	g	g	g	g	A	g	A	g	g	g	g	g	g	A	A	g	g	g	g	cds814;Name=YP_008637709.1;Parent=gene871;Dbxref=Genbank:YP_008637709.1,GeneID:17149501;gbkey=CDS;product=putative histone deacetylase superfamily protein;protein_id=YP_008637709.1;transl_table=11 putative histone deacetylase superfamily protein (1013750-1014697 -)	silent ggc -> ggT;	1713 2064 556 557
NC_022541.1	1014430	g	g	g	g	g	g	g	g	g	g	g	g	A	g	A	g	g	g	g	g	g	A	A	g	g	g	g	cds814;Name=YP_008637709.1;Parent=gene871;Dbxref=Genbank:YP_008637709.1,GeneID:17149501;gbkey=CDS;product=putative histone deacetylase superfamily protein;protein_id=YP_008637709.1;transl_table=11 putative histone deacetylase superfamily protein (1013750-1014697 -)	silent ctg -> Ttg;	1713 2064 556 557
NC_022541.1	1014464	g	g	g	g	g	g	g	g	g	g	g	g	A	g	A	g	g	g	g	g	g	A	A	g	g	g	g	cds814;Name=YP_008637709.1;Parent=gene871;Dbxref=Genbank:YP_008637709.1,GeneID:17149501;gbkey=CDS;product=putative histone deacetylase superfamily protein;protein_id=YP_008637709.1;transl_table=11 putative histone deacetylase superfamily protein (1013750-1014697 -)	silent gac -> gaT;	1713 2064 556 557
NC_022541.1	1014467	c	c	c	c	c	c	c	c	c	c	c	c	T	c	T	c	c	c	c	c	c	T	T	c	c	c	c	cds814;Name=YP_008637709.1;Parent=gene871;Dbxref=Genbank:YP_008637709.1,GeneID:17149501;gbkey=CDS;product=putative histone deacetylase superfamily protein;protein_id=YP_008637709.1;transl_table=11 putative histone deacetylase superfamily protein (1013750-1014697 -)	silent gtg -> gtA;	1713 2064 556 557
NC_022541.1	1014614	g	g	g	C	g	g	C	g	g	C	g	C	C	C	C	C	g	C	C	g	g	C	C	g	g	g	C	cds814;Name=YP_008637709.1;Parent=gene871;Dbxref=Genbank:YP_008637709.1,GeneID:17149501;gbkey=CDS;product=putative histone deacetylase superfamily protein;protein_id=YP_008637709.1;transl_table=11 putative histone deacetylase superfamily protein (1013750-1014697 -)	silent gtc -> gtG;	1138 1420 1646 1680 1713 1811 2064 220 301 3035 556 557 XCP123
NC_022541.1	1014717	t	t	t	t	t	t	t	t	t	t	t	t	C	t	C	t	t	t	t	t	t	C	C	t	t	t	t			1713 2064 556 557
NC_022541.1	1014928	g	g	g	g	g	g	g	g	g	g	g	g	A	g	A	g	g	g	g	g	g	A	A	g	g	g	A	cds815;Name=YP_008637710.1;Parent=gene872;Dbxref=Genbank:YP_008637710.1,GeneID:17149502;gbkey=CDS;product=putative cobalamin adenosyltransferase;protein_id=YP_008637710.1;transl_table=11 putative cobalamin adenosyltransferase (1014736-1015293 -)	silent tgc -> tgT;	1713 2064 556 557 XCP123
NC_022541.1	1014934	a	a	a	a	a	a	a	a	a	a	a	a	C	a	C	a	a	a	a	a	a	C	C	a	a	a	a	cds815;Name=YP_008637710.1;Parent=gene872;Dbxref=Genbank:YP_008637710.1,GeneID:17149502;gbkey=CDS;product=putative cobalamin adenosyltransferase;protein_id=YP_008637710.1;transl_table=11 putative cobalamin adenosyltransferase (1014736-1015293 -)	silent gct -> gcG;	1713 2064 556 557
NC_022541.1	1014943	t	t	t	t	t	t	t	t	t	t	t	t	C	t	C	t	t	t	t	t	t	C	C	t	t	t	t	cds815;Name=YP_008637710.1;Parent=gene872;Dbxref=Genbank:YP_008637710.1,GeneID:17149502;gbkey=CDS;product=putative cobalamin adenosyltransferase;protein_id=YP_008637710.1;transl_table=11 putative cobalamin adenosyltransferase (1014736-1015293 -)	silent gaa -> gaG;	1713 2064 556 557
NC_022541.1	1014952	t	t	t	t	t	t	t	t	t	t	t	t	G	t	G	t	t	t	t	t	t	G	G	t	t	t	t	cds815;Name=YP_008637710.1;Parent=gene872;Dbxref=Genbank:YP_008637710.1,GeneID:17149502;gbkey=CDS;product=putative cobalamin adenosyltransferase;protein_id=YP_008637710.1;transl_table=11 putative cobalamin adenosyltransferase (1014736-1015293 -)	silent gca -> gcC;	1713 2064 556 557
NC_022541.1	1015192	a	a	a	a	a	a	a	a	a	a	a	a	G	a	G	a	a	a	a	a	a	G	G	a	a	a	a	cds815;Name=YP_008637710.1;Parent=gene872;Dbxref=Genbank:YP_008637710.1,GeneID:17149502;gbkey=CDS;product=putative cobalamin adenosyltransferase;protein_id=YP_008637710.1;transl_table=11 putative cobalamin adenosyltransferase (1014736-1015293 -)	silent aat -> aaC;	1713 2064 556 557
NC_022541.1	1015219	c	c	c	G	c	c	G	c	c	G	c	G	c	G	c	G	c	G	G	c	c	c	c	c	c	c	G	cds815;Name=YP_008637710.1;Parent=gene872;Dbxref=Genbank:YP_008637710.1,GeneID:17149502;gbkey=CDS;product=putative cobalamin adenosyltransferase;protein_id=YP_008637710.1;transl_table=11 putative cobalamin adenosyltransferase (1014736-1015293 -)	silent cgg -> cgC;	1138 1420 1646 1680 1811 220 301 3035 XCP123
NC_022541.1	1015264	g	g	g	g	g	g	g	g	g	g	g	g	C	g	C	g	g	g	g	g	g	C	C	g	g	g	g	cds815;Name=YP_008637710.1;Parent=gene872;Dbxref=Genbank:YP_008637710.1,GeneID:17149502;gbkey=CDS;product=putative cobalamin adenosyltransferase;protein_id=YP_008637710.1;transl_table=11 putative cobalamin adenosyltransferase (1014736-1015293 -)	silent acc -> acG;	1713 2064 556 557
NC_022541.1	1015273	g	g	g	g	g	g	g	g	g	g	g	g	A	g	A	g	g	g	g	g	g	A	A	g	g	g	g	cds815;Name=YP_008637710.1;Parent=gene872;Dbxref=Genbank:YP_008637710.1,GeneID:17149502;gbkey=CDS;product=putative cobalamin adenosyltransferase;protein_id=YP_008637710.1;transl_table=11 putative cobalamin adenosyltransferase (1014736-1015293 -)	silent cgc -> cgT;	1713 2064 556 557
NC_022541.1	1015276	g	g	g	g	g	g	g	g	g	g	g	g	A	g	A	g	g	g	g	g	g	A	A	g	g	g	g	cds815;Name=YP_008637710.1;Parent=gene872;Dbxref=Genbank:YP_008637710.1,GeneID:17149502;gbkey=CDS;product=putative cobalamin adenosyltransferase;protein_id=YP_008637710.1;transl_table=11 putative cobalamin adenosyltransferase (1014736-1015293 -)	silent tcc -> tcT;	1713 2064 556 557
NC_022541.1	1015282	t	t	t	t	t	t	t	t	t	t	t	t	A	t	A	t	t	t	t	t	t	A	A	t	t	t	t	cds815;Name=YP_008637710.1;Parent=gene872;Dbxref=Genbank:YP_008637710.1,GeneID:17149502;gbkey=CDS;product=putative cobalamin adenosyltransferase;protein_id=YP_008637710.1;transl_table=11 putative cobalamin adenosyltransferase (1014736-1015293 -)	silent cga -> cgT;	1713 2064 556 557
NC_022541.1	1015363	g	g	g	A	g	g	A	g	g	A	g	A	g	A	g	A	g	A	A	g	g	g	g	g	g	g	A	cds816;Name=YP_008637711.1;Parent=gene873;Dbxref=Genbank:YP_008637711.1,GeneID:17149503;gbkey=CDS;product=hypothetical protein;protein_id=YP_008637711.1;transl_table=11 hypothetical protein (1015297-1015875 -)	silent gcc -> gcT;	1138 1420 1646 1680 1811 220 301 3035 XCP123
NC_022541.1	1015363	g	g	g	g	g	g	g	g	g	g	g	g	T	g	T	g	g	g	g	g	g	T	T	g	g	g	g	cds816;Name=YP_008637711.1;Parent=gene873;Dbxref=Genbank:YP_008637711.1,GeneID:17149503;gbkey=CDS;product=hypothetical protein;protein_id=YP_008637711.1;transl_table=11 hypothetical protein (1015297-1015875 -)	silent gcc -> gcA;	1713 2064 556 557
NC_022541.1	1015384	g	g	g	g	g	g	g	g	g	g	g	g	A	g	A	g	g	g	g	g	g	A	A	g	g	g	g	cds816;Name=YP_008637711.1;Parent=gene873;Dbxref=Genbank:YP_008637711.1,GeneID:17149503;gbkey=CDS;product=hypothetical protein;protein_id=YP_008637711.1;transl_table=11 hypothetical protein (1015297-1015875 -)	silent agc -> agT;	1713 2064 556 557
NC_022541.1	1015396	t	t	t	G	t	t	G	t	t	G	t	G	t	G	t	G	t	G	G	t	t	t	t	t	t	t	G	cds816;Name=YP_008637711.1;Parent=gene873;Dbxref=Genbank:YP_008637711.1,GeneID:17149503;gbkey=CDS;product=hypothetical protein;protein_id=YP_008637711.1;transl_table=11 hypothetical protein (1015297-1015875 -)	silent cca -> ccC;	1138 1420 1646 1680 1811 220 301 3035 XCP123
NC_022541.1	1015414	g	g	g	A	g	g	A	g	g	A	g	A	g	A	g	A	g	A	A	g	g	g	g	g	g	g	A	cds816;Name=YP_008637711.1;Parent=gene873;Dbxref=Genbank:YP_008637711.1,GeneID:17149503;gbkey=CDS;product=hypothetical protein;protein_id=YP_008637711.1;transl_table=11 hypothetical protein (1015297-1015875 -)	silent tac -> taT;	1138 1420 1646 1680 1811 220 301 3035 XCP123
NC_022541.1	1015424	g	g	g	A	g	g	A	g	g	A	g	A	A	A	A	A	g	A	A	g	g	A	A	g	g	g	A	cds816;Name=YP_008637711.1;Parent=gene873;Dbxref=Genbank:YP_008637711.1,GeneID:17149503;gbkey=CDS;product=hypothetical protein;protein_id=YP_008637711.1;transl_table=11 hypothetical protein (1015297-1015875 -)	non-silent tcc -> tTc;	1138 1420 1646 1680 1713 1811 2064 220 301 3035 556 557 XCP123
NC_022541.1	1015504	c	c	c	c	c	c	c	c	c	c	c	c	T	c	T	c	c	c	c	c	c	T	T	c	c	c	c	cds816;Name=YP_008637711.1;Parent=gene873;Dbxref=Genbank:YP_008637711.1,GeneID:17149503;gbkey=CDS;product=hypothetical protein;protein_id=YP_008637711.1;transl_table=11 hypothetical protein (1015297-1015875 -)	silent gtg -> gtA;	1713 2064 556 557
NC_022541.1	1015510	g	g	g	A	g	g	A	g	g	A	g	A	g	A	g	A	g	A	A	g	g	g	g	g	g	g	A	cds816;Name=YP_008637711.1;Parent=gene873;Dbxref=Genbank:YP_008637711.1,GeneID:17149503;gbkey=CDS;product=hypothetical protein;protein_id=YP_008637711.1;transl_table=11 hypothetical protein (1015297-1015875 -)	silent atc -> atT;	1138 1420 1646 1680 1811 220 301 3035 XCP123
NC_022541.1	1015531	c	c	c	T	c	c	T	c	c	T	c	T	c	T	c	T	c	T	T	c	c	c	c	c	c	c	T	cds816;Name=YP_008637711.1;Parent=gene873;Dbxref=Genbank:YP_008637711.1,GeneID:17149503;gbkey=CDS;product=hypothetical protein;protein_id=YP_008637711.1;transl_table=11 hypothetical protein (1015297-1015875 -)	silent cgg -> cgA;	1138 1420 1646 1680 1811 220 301 3035 XCP123
NC_022541.1	1015552	t	t	t	A	t	t	A	t	t	A	t	A	t	A	t	A	t	A	A	t	t	t	t	t	t	t	A	cds816;Name=YP_008637711.1;Parent=gene873;Dbxref=Genbank:YP_008637711.1,GeneID:17149503;gbkey=CDS;product=hypothetical protein;protein_id=YP_008637711.1;transl_table=11 hypothetical protein (1015297-1015875 -)	silent gca -> gcT;	1138 1420 1646 1680 1811 220 301 3035 XCP123
NC_022541.1	1015552	t	t	t	t	t	t	t	t	t	t	t	t	G	t	G	t	t	t	t	t	t	G	G	t	t	t	t	cds816;Name=YP_008637711.1;Parent=gene873;Dbxref=Genbank:YP_008637711.1,GeneID:17149503;gbkey=CDS;product=hypothetical protein;protein_id=YP_008637711.1;transl_table=11 hypothetical protein (1015297-1015875 -)	silent gca -> gcC;	1713 2064 556 557
NC_022541.1	1015558	a	a	a	G	a	a	G	a	a	G	a	G	a	G	a	G	a	G	G	a	a	a	a	a	a	a	G	cds816;Name=YP_008637711.1;Parent=gene873;Dbxref=Genbank:YP_008637711.1,GeneID:17149503;gbkey=CDS;product=hypothetical protein;protein_id=YP_008637711.1;transl_table=11 hypothetical protein (1015297-1015875 -)	silent cat -> caC;	1138 1420 1646 1680 1811 220 301 3035 XCP123
NC_022541.1	1015579	t	t	t	C	t	t	C	t	t	C	t	C	t	C	t	C	t	C	C	t	t	t	t	t	t	t	C	cds816;Name=YP_008637711.1;Parent=gene873;Dbxref=Genbank:YP_008637711.1,GeneID:17149503;gbkey=CDS;product=hypothetical protein;protein_id=YP_008637711.1;transl_table=11 hypothetical protein (1015297-1015875 -)	silent gta -> gtG;	1138 1420 1646 1680 1811 220 301 3035 XCP123
NC_022541.1	1015603	g	g	g	A	g	g	A	g	g	A	g	A	g	A	g	A	g	A	A	g	g	g	g	g	g	g	A	cds816;Name=YP_008637711.1;Parent=gene873;Dbxref=Genbank:YP_008637711.1,GeneID:17149503;gbkey=CDS;product=hypothetical protein;protein_id=YP_008637711.1;transl_table=11 hypothetical protein (1015297-1015875 -)	silent tac -> taT;	1138 1420 1646 1680 1811 220 301 3035 XCP123
NC_022541.1	1015667	t	t	t	t	t	t	t	t	t	t	t	t	t	t	t	t	t	t	t	t	t	t	t	t	t	t	A	cds816;Name=YP_008637711.1;Parent=gene873;Dbxref=Genbank:YP_008637711.1,GeneID:17149503;gbkey=CDS;product=hypothetical protein;protein_id=YP_008637711.1;transl_table=11 hypothetical protein (1015297-1015875 -)	non-silent cag -> cTg;	XCP123
NC_022541.1	1015669	a	a	a	G	a	a	G	a	a	G	a	G	G	G	G	G	a	G	G	a	a	G	G	a	a	a	G	cds816;Name=YP_008637711.1;Parent=gene873;Dbxref=Genbank:YP_008637711.1,GeneID:17149503;gbkey=CDS;product=hypothetical protein;protein_id=YP_008637711.1;transl_table=11 hypothetical protein (1015297-1015875 -)	silent ggt -> ggC;	1138 1420 1646 1680 1713 1811 2064 220 301 3035 556 557 XCP123
NC_022541.1	1015678	c	c	c	G	c	c	G	c	c	G	c	G	c	G	c	G	c	G	G	c	c	c	c	c	c	c	G	cds816;Name=YP_008637711.1;Parent=gene873;Dbxref=Genbank:YP_008637711.1,GeneID:17149503;gbkey=CDS;product=hypothetical protein;protein_id=YP_008637711.1;transl_table=11 hypothetical protein (1015297-1015875 -)	silent gtg -> gtC;	1138 1420 1646 1680 1811 220 301 3035 XCP123
NC_022541.1	1015710	c	c	c	T	c	c	T	c	c	T	c	T	T	T	T	T	c	T	T	c	c	T	T	c	c	c	T	cds816;Name=YP_008637711.1;Parent=gene873;Dbxref=Genbank:YP_008637711.1,GeneID:17149503;gbkey=CDS;product=hypothetical protein;protein_id=YP_008637711.1;transl_table=11 hypothetical protein (1015297-1015875 -)	non-silent gtg -> Atg;	1138 1420 1646 1680 1713 1811 2064 220 301 3035 556 557 XCP123
NC_022541.1	1015717	c	c	c	c	c	c	c	c	c	c	c	c	T	c	T	c	c	c	c	c	c	T	T	c	c	c	c	cds816;Name=YP_008637711.1;Parent=gene873;Dbxref=Genbank:YP_008637711.1,GeneID:17149503;gbkey=CDS;product=hypothetical protein;protein_id=YP_008637711.1;transl_table=11 hypothetical protein (1015297-1015875 -)	silent ccg -> ccA;	1713 2064 556 557
NC_022541.1	1015735	g	g	g	A	g	g	A	g	g	A	g	A	g	A	g	A	g	A	A	g	g	g	g	g	g	g	A	cds816;Name=YP_008637711.1;Parent=gene873;Dbxref=Genbank:YP_008637711.1,GeneID:17149503;gbkey=CDS;product=hypothetical protein;protein_id=YP_008637711.1;transl_table=11 hypothetical protein (1015297-1015875 -)	silent cgc -> cgT;	1138 1420 1646 1680 1811 220 301 3035 XCP123
NC_022541.1	1015738	c	c	c	T	c	c	T	c	c	T	c	T	c	T	c	T	c	T	T	c	c	c	c	c	c	c	T	cds816;Name=YP_008637711.1;Parent=gene873;Dbxref=Genbank:YP_008637711.1,GeneID:17149503;gbkey=CDS;product=hypothetical protein;protein_id=YP_008637711.1;transl_table=11 hypothetical protein (1015297-1015875 -)	silent gcg -> gcA;	1138 1420 1646 1680 1811 220 301 3035 XCP123
NC_022541.1	1015750	a	a	a	G	a	a	G	a	a	G	a	G	a	G	a	G	a	G	G	a	a	a	a	a	a	a	G	cds816;Name=YP_008637711.1;Parent=gene873;Dbxref=Genbank:YP_008637711.1,GeneID:17149503;gbkey=CDS;product=hypothetical protein;protein_id=YP_008637711.1;transl_table=11 hypothetical protein (1015297-1015875 -)	silent ttt -> ttC;	1138 1420 1646 1680 1811 220 301 3035 XCP123
NC_022541.1	1015783	a	a	a	G	a	a	G	a	a	G	a	G	a	G	a	G	a	G	G	a	a	a	a	a	a	a	G	cds816;Name=YP_008637711.1;Parent=gene873;Dbxref=Genbank:YP_008637711.1,GeneID:17149503;gbkey=CDS;product=hypothetical protein;protein_id=YP_008637711.1;transl_table=11 hypothetical protein (1015297-1015875 -)	silent gat -> gaC;	1138 1420 1646 1680 1811 220 301 3035 XCP123
NC_022541.1	1015813	c	c	c	G	c	c	G	c	c	G	c	G	c	G	c	G	c	G	G	c	c	c	c	c	c	c	G	cds816;Name=YP_008637711.1;Parent=gene873;Dbxref=Genbank:YP_008637711.1,GeneID:17149503;gbkey=CDS;product=hypothetical protein;protein_id=YP_008637711.1;transl_table=11 hypothetical protein (1015297-1015875 -)	silent acg -> acC;	1138 1420 1646 1680 1811 220 301 3035 XCP123
NC_022541.1	1015816	a	a	a	G	a	a	G	a	a	G	a	G	G	G	G	G	a	G	G	a	a	G	G	a	a	a	G	cds816;Name=YP_008637711.1;Parent=gene873;Dbxref=Genbank:YP_008637711.1,GeneID:17149503;gbkey=CDS;product=hypothetical protein;protein_id=YP_008637711.1;transl_table=11 hypothetical protein (1015297-1015875 -)	silent gct -> gcC;	1138 1420 1646 1680 1713 1811 2064 220 301 3035 556 557 XCP123
NC_022541.1	1015829	a	a	a	G	a	a	G	a	a	G	a	G	a	G	a	G	a	G	G	a	a	a	a	a	a	a	G	cds816;Name=YP_008637711.1;Parent=gene873;Dbxref=Genbank:YP_008637711.1,GeneID:17149503;gbkey=CDS;product=hypothetical protein;protein_id=YP_008637711.1;transl_table=11 hypothetical protein (1015297-1015875 -)	non-silent gtg -> gCg;	1138 1420 1646 1680 1811 220 301 3035 XCP123
NC_022541.1	1015864	a	a	a	G	a	a	G	a	a	G	a	G	a	G	a	G	a	G	G	a	a	a	a	a	a	a	G	cds816;Name=YP_008637711.1;Parent=gene873;Dbxref=Genbank:YP_008637711.1,GeneID:17149503;gbkey=CDS;product=hypothetical protein;protein_id=YP_008637711.1;transl_table=11 hypothetical protein (1015297-1015875 -)	silent cgt -> cgC;	1138 1420 1646 1680 1811 220 301 3035 XCP123
NC_022541.1	1015870	a	a	a	C	a	a	C	a	a	C	a	C	a	C	a	C	a	C	C	a	a	a	a	a	a	a	C	cds816;Name=YP_008637711.1;Parent=gene873;Dbxref=Genbank:YP_008637711.1,GeneID:17149503;gbkey=CDS;product=hypothetical protein;protein_id=YP_008637711.1;transl_table=11 hypothetical protein (1015297-1015875 -)	silent act -> acG;	1138 1420 1646 1680 1811 220 301 3035 XCP123
NC_022541.1	1015882	a	a	a	G	a	a	G	a	a	G	a	G	a	G	a	G	a	G	G	a	a	a	a	a	a	a	G			1138 1420 1646 1680 1811 220 301 3035 XCP123
NC_022541.1	1015894	c	c	c	T	c	c	T	c	c	T	c	T	T	T	T	T	c	T	T	c	c	T	T	c	c	c	T			1138 1420 1646 1680 1713 1811 2064 220 301 3035 556 557 XCP123
NC_022541.1	1015895	a	a	a	G	a	a	G	a	a	G	a	G	a	G	a	G	a	G	G	a	a	a	a	a	a	a	G			1138 1420 1646 1680 1811 220 301 3035 XCP123
NC_022541.1	1015897	g	g	g	A	g	g	A	g	g	A	g	A	A	A	A	A	g	A	A	g	g	A	A	g	g	g	A			1138 1420 1646 1680 1713 1811 2064 220 301 3035 556 557 XCP123
NC_022541.1	1015936	a	C	C	C	a	C	C	a	C	C	a	C	C	C	C	C	a	C	C	C	C	C	C	C	C	C	C			1056 1058 1138 1402 1420 1495 1646 1680 1713 1811 2064 220 301 3035 3660 381 556 557 670 X621 X631 XCP123
NC_022541.1	1015943	c	c	c	A	c	c	A	c	c	A	c	A	c	A	c	A	c	A	A	c	c	c	c	c	c	c	A			1138 1420 1646 1680 1811 220 301 3035 XCP123
NC_022541.1	1015956	g	g	g	C	g	g	C	g	g	C	g	C	g	C	g	C	g	C	C	g	g	g	g	g	g	g	C			1138 1420 1646 1680 1811 220 301 3035 XCP123
NC_022541.1	1015957	a	a	a	G	a	a	G	a	a	G	a	G	a	G	a	G	a	G	G	a	a	a	a	a	a	a	G			1138 1420 1646 1680 1811 220 301 3035 XCP123
NC_022541.1	1015959	c	c	c	T	c	c	T	c	c	T	c	T	T	T	T	T	c	T	T	c	c	T	T	c	c	c	T			1138 1420 1646 1680 1713 1811 2064 220 301 3035 556 557 XCP123
NC_022541.1	1015969	g	g	g	A	g	g	A	g	g	A	g	A	g	A	g	A	g	A	A	g	g	g	g	g	g	g	A			1138 1420 1646 1680 1811 220 301 3035 XCP123
NC_022541.1	1015974	g	g	g	A	g	g	A	g	g	A	g	A	A	A	A	A	g	A	A	g	g	A	A	g	g	g	A			1138 1420 1646 1680 1713 1811 2064 220 301 3035 556 557 XCP123
NC_022541.1	1016008	a	a	a	G	a	a	G	a	a	G	a	G	a	G	a	G	a	G	G	a	a	a	a	a	a	a	G			1138 1420 1646 1680 1811 220 301 3035 XCP123
NC_022541.1	1016017	g	g	g	A	g	g	A	g	g	A	g	A	g	A	g	A	g	A	A	g	g	g	g	g	g	g	A			1138 1420 1646 1680 1811 220 301 3035 XCP123
NC_022541.1	1016034	t	t	t	C	t	t	C	t	t	C	t	C	t	C	t	C	t	C	C	t	t	t	t	t	t	t	C			1138 1420 1646 1680 1811 220 301 3035 XCP123
NC_022541.1	1016039	g	g	g	C	g	g	C	g	g	C	g	C	C	C	C	C	g	C	C	g	g	C	C	g	g	g	C			1138 1420 1646 1680 1713 1811 2064 220 301 3035 556 557 XCP123
NC_022541.1	1016040	g	g	g	A	g	g	A	g	g	A	g	A	g	A	g	A	g	A	A	g	g	g	g	g	g	g	A			1138 1420 1646 1680 1811 220 301 3035 XCP123
NC_022541.1	1016043	a	a	a	C	a	a	C	a	a	C	a	C	a	C	a	C	a	C	C	a	a	a	a	a	a	a	C			1138 1420 1646 1680 1811 220 301 3035 XCP123
NC_022541.1	1016051	t	t	t	C	t	t	C	t	t	C	t	C	C	C	C	C	t	C	C	t	t	C	C	t	t	t	C			1138 1420 1646 1680 1713 1811 2064 220 301 3035 556 557 XCP123
NC_022541.1	1016069	c	c	c	c	c	c	c	c	c	c	c	c	G	c	G	c	c	c	c	c	c	G	G	c	c	c	c			1713 2064 556 557
NC_022541.1	1016072	t	t	t	t	t	t	t	t	t	t	t	t	C	t	C	t	t	t	t	t	t	C	C	t	t	t	t			1713 2064 556 557
NC_022541.1	1016075	g	g	g	T	g	g	T	g	g	T	g	T	g	T	g	T	g	T	T	g	g	g	g	g	g	g	T			1138 1420 1646 1680 1811 220 301 3035 XCP123
NC_022541.1	1016081	g	g	g	C	g	g	C	g	g	C	g	C	g	C	g	C	g	C	C	g	g	g	g	g	g	g	C			1138 1420 1646 1680 1811 220 301 3035 XCP123
NC_022541.1	1016083	c	c	c	c	c	c	c	c	c	c	c	c	*	c	*	c	c	c	c	c	c	*	*	c	c	c	c			1713 2064 556 557
NC_022541.1	1016090	c	c	c	T	c	c	T	c	c	T	c	T	c	T	c	T	c	T	T	c	c	c	c	c	c	c	T			1138 1420 1646 1680 1811 220 301 3035 XCP123
NC_022541.1	1016100	g	g	g	g	g	g	g	g	g	g	g	g	A	g	A	g	g	g	g	g	g	A	A	g	g	g	g			1713 2064 556 557
NC_022541.1	1016101	g	g	g	C	g	g	C	g	g	C	g	C	g	C	g	C	g	C	C	g	g	g	g	g	g	g	C			1138 1420 1646 1680 1811 220 301 3035 XCP123
NC_022541.1	1016104	g	g	g	A	g	g	A	g	g	A	g	A	g	A	g	A	g	A	A	g	g	g	g	g	g	g	A			1138 1420 1646 1680 1811 220 301 3035 XCP123
NC_022541.1	1016111	g	g	g	g	g	g	g	g	g	g	g	g	C	g	C	g	g	g	g	g	g	C	C	g	g	g	g			1713 2064 556 557
NC_022541.1	1016112	c	c	c	T	c	c	T	c	c	T	c	T	c	T	c	T	c	T	T	c	c	c	c	c	c	c	T			1138 1420 1646 1680 1811 220 301 3035 XCP123
NC_022541.1	1016116	g	g	g	g	g	g	g	g	g	g	g	g	A	g	A	g	g	g	g	g	g	A	A	g	g	g	g			1713 2064 556 557
NC_022541.1	1016118	c	c	c	T	c	c	T	c	c	T	c	T	T	T	T	T	c	T	T	c	c	T	T	c	c	c	T			1138 1420 1646 1680 1713 1811 2064 220 301 3035 556 557 XCP123
NC_022541.1	1016144	c	c	c	T	c	c	T	c	c	T	c	T	c	T	c	T	c	T	T	c	c	c	c	c	c	c	T			1138 1420 1646 1680 1811 220 301 3035 XCP123
NC_022541.1	1016175	c	c	c	G	c	c	G	c	c	G	c	G	c	G	c	G	c	G	G	c	c	c	c	c	c	c	G			1138 1420 1646 1680 1811 220 301 3035 XCP123
NC_022541.1	1016178	g	g	g	T	g	g	T	g	g	T	g	T	g	T	g	T	g	T	T	g	g	g	g	g	g	g	T			1138 1420 1646 1680 1811 220 301 3035 XCP123
NC_022541.1	1016187	t	t	t	C	t	t	C	t	t	C	t	C	C	C	C	C	t	C	C	t	t	C	C	t	t	t	C			1138 1420 1646 1680 1713 1811 2064 220 301 3035 556 557 XCP123
NC_022541.1	1016272	t	t	t	t	t	t	t	t	t	t	t	t	C	t	C	t	t	t	t	t	t	C	C	t	t	t	t	cds817;Name=YP_008637712.1;Parent=gene874;Dbxref=Genbank:YP_008637712.1,GeneID:17149504;gbkey=CDS;product=putative 2-octaprenyl-6-methoxyphenol hydroxylase%2C FAD%2FNAD%28P%29-binding;protein_id=YP_008637712.1;transl_table=11 putative 2-octaprenyl-6-methoxyphenol hydroxylase%2C FAD%2FNAD%28P%29-binding (1016216-1017424 +)	silent ctt -> ctC;	1713 2064 556 557
NC_022541.1	1016323	t	t	t	C	t	t	C	t	t	C	t	C	t	C	t	C	t	C	C	t	t	t	t	t	t	t	C	cds817;Name=YP_008637712.1;Parent=gene874;Dbxref=Genbank:YP_008637712.1,GeneID:17149504;gbkey=CDS;product=putative 2-octaprenyl-6-methoxyphenol hydroxylase%2C FAD%2FNAD%28P%29-binding;protein_id=YP_008637712.1;transl_table=11 putative 2-octaprenyl-6-methoxyphenol hydroxylase%2C FAD%2FNAD%28P%29-binding (1016216-1017424 +)	silent act -> acC;	1138 1420 1646 1680 1811 220 301 3035 XCP123
NC_022541.1	1016324	c	c	c	T	c	c	c	c	c	c	c	c	c	c	c	c	c	c	c	c	c	c	c	c	c	c	c	cds817;Name=YP_008637712.1;Parent=gene874;Dbxref=Genbank:YP_008637712.1,GeneID:17149504;gbkey=CDS;product=putative 2-octaprenyl-6-methoxyphenol hydroxylase%2C FAD%2FNAD%28P%29-binding;protein_id=YP_008637712.1;transl_table=11 putative 2-octaprenyl-6-methoxyphenol hydroxylase%2C FAD%2FNAD%28P%29-binding (1016216-1017424 +)	non-silent ccg -> Tcg;	1138
NC_022541.1	1016332	c	c	c	c	c	c	c	c	c	c	c	c	T	c	T	c	c	c	c	c	c	T	T	c	c	c	c	cds817;Name=YP_008637712.1;Parent=gene874;Dbxref=Genbank:YP_008637712.1,GeneID:17149504;gbkey=CDS;product=putative 2-octaprenyl-6-methoxyphenol hydroxylase%2C FAD%2FNAD%28P%29-binding;protein_id=YP_008637712.1;transl_table=11 putative 2-octaprenyl-6-methoxyphenol hydroxylase%2C FAD%2FNAD%28P%29-binding (1016216-1017424 +)	silent ggc -> ggT;	1713 2064 556 557
NC_022541.1	1016333	g	g	g	A	g	g	A	g	g	A	g	A	g	A	g	A	g	A	A	g	g	g	g	g	g	g	A	cds817;Name=YP_008637712.1;Parent=gene874;Dbxref=Genbank:YP_008637712.1,GeneID:17149504;gbkey=CDS;product=putative 2-octaprenyl-6-methoxyphenol hydroxylase%2C FAD%2FNAD%28P%29-binding;protein_id=YP_008637712.1;transl_table=11 putative 2-octaprenyl-6-methoxyphenol hydroxylase%2C FAD%2FNAD%28P%29-binding (1016216-1017424 +)	non-silent gcg -> Acg;	1138 1420 1646 1680 1811 220 301 3035 XCP123
NC_022541.1	1016395	g	g	g	C	g	g	C	g	g	C	g	C	g	C	g	C	g	C	C	g	g	g	g	g	g	g	C	cds817;Name=YP_008637712.1;Parent=gene874;Dbxref=Genbank:YP_008637712.1,GeneID:17149504;gbkey=CDS;product=putative 2-octaprenyl-6-methoxyphenol hydroxylase%2C FAD%2FNAD%28P%29-binding;protein_id=YP_008637712.1;transl_table=11 putative 2-octaprenyl-6-methoxyphenol hydroxylase%2C FAD%2FNAD%28P%29-binding (1016216-1017424 +)	silent ctg -> ctC;	1138 1420 1646 1680 1811 220 301 3035 XCP123
NC_022541.1	1016539	a	a	a	G	a	a	G	a	a	G	a	G	a	G	a	G	a	G	G	a	a	a	a	a	a	a	G	cds817;Name=YP_008637712.1;Parent=gene874;Dbxref=Genbank:YP_008637712.1,GeneID:17149504;gbkey=CDS;product=putative 2-octaprenyl-6-methoxyphenol hydroxylase%2C FAD%2FNAD%28P%29-binding;protein_id=YP_008637712.1;transl_table=11 putative 2-octaprenyl-6-methoxyphenol hydroxylase%2C FAD%2FNAD%28P%29-binding (1016216-1017424 +)	silent gca -> gcG;	1138 1420 1646 1680 1811 220 301 3035 XCP123
NC_022541.1	1016552	g	g	g	g	g	g	g	g	g	g	g	g	g	g	g	g	g	g	g	A	g	g	g	g	g	g	g	cds817;Name=YP_008637712.1;Parent=gene874;Dbxref=Genbank:YP_008637712.1,GeneID:17149504;gbkey=CDS;product=putative 2-octaprenyl-6-methoxyphenol hydroxylase%2C FAD%2FNAD%28P%29-binding;protein_id=YP_008637712.1;transl_table=11 putative 2-octaprenyl-6-methoxyphenol hydroxylase%2C FAD%2FNAD%28P%29-binding (1016216-1017424 +)	non-silent gat -> Aat;	3660
NC_022541.1	1016553	a	a	a	a	a	a	a	a	a	a	a	a	a	a	a	a	a	a	a	C	a	a	a	a	a	a	a	cds817;Name=YP_008637712.1;Parent=gene874;Dbxref=Genbank:YP_008637712.1,GeneID:17149504;gbkey=CDS;product=putative 2-octaprenyl-6-methoxyphenol hydroxylase%2C FAD%2FNAD%28P%29-binding;protein_id=YP_008637712.1;transl_table=11 putative 2-octaprenyl-6-methoxyphenol hydroxylase%2C FAD%2FNAD%28P%29-binding (1016216-1017424 +)	non-silent gat -> gCt;	3660
NC_022541.1	1016558	t	t	t	C	t	t	C	t	t	C	t	C	t	C	t	C	t	C	C	t	t	t	t	t	t	t	C	cds817;Name=YP_008637712.1;Parent=gene874;Dbxref=Genbank:YP_008637712.1,GeneID:17149504;gbkey=CDS;product=putative 2-octaprenyl-6-methoxyphenol hydroxylase%2C FAD%2FNAD%28P%29-binding;protein_id=YP_008637712.1;transl_table=11 putative 2-octaprenyl-6-methoxyphenol hydroxylase%2C FAD%2FNAD%28P%29-binding (1016216-1017424 +)	silent ttg -> Ctg;	1138 1420 1646 1680 1811 220 301 3035 XCP123
NC_022541.1	1016605	t	t	t	C	t	t	C	t	t	C	t	C	t	C	t	C	t	C	C	t	t	t	t	t	t	t	C	cds817;Name=YP_008637712.1;Parent=gene874;Dbxref=Genbank:YP_008637712.1,GeneID:17149504;gbkey=CDS;product=putative 2-octaprenyl-6-methoxyphenol hydroxylase%2C FAD%2FNAD%28P%29-binding;protein_id=YP_008637712.1;transl_table=11 putative 2-octaprenyl-6-methoxyphenol hydroxylase%2C FAD%2FNAD%28P%29-binding (1016216-1017424 +)	silent cct -> ccC;	1138 1420 1646 1680 1811 220 301 3035 XCP123
NC_022541.1	1016626	g	g	g	A	g	g	A	g	g	A	g	A	g	A	g	A	g	A	A	g	g	g	g	g	g	g	A	cds817;Name=YP_008637712.1;Parent=gene874;Dbxref=Genbank:YP_008637712.1,GeneID:17149504;gbkey=CDS;product=putative 2-octaprenyl-6-methoxyphenol hydroxylase%2C FAD%2FNAD%28P%29-binding;protein_id=YP_008637712.1;transl_table=11 putative 2-octaprenyl-6-methoxyphenol hydroxylase%2C FAD%2FNAD%28P%29-binding (1016216-1017424 +)	silent gag -> gaA;	1138 1420 1646 1680 1811 220 301 3035 XCP123
NC_022541.1	1016641	c	c	c	c	c	c	c	c	c	c	c	c	T	c	T	c	c	c	c	c	c	T	T	c	c	c	c	cds817;Name=YP_008637712.1;Parent=gene874;Dbxref=Genbank:YP_008637712.1,GeneID:17149504;gbkey=CDS;product=putative 2-octaprenyl-6-methoxyphenol hydroxylase%2C FAD%2FNAD%28P%29-binding;protein_id=YP_008637712.1;transl_table=11 putative 2-octaprenyl-6-methoxyphenol hydroxylase%2C FAD%2FNAD%28P%29-binding (1016216-1017424 +)	silent gac -> gaT;	1713 2064 556 557
NC_022541.1	1016661	t	t	t	C	t	t	C	t	t	C	t	C	C	C	C	C	t	C	C	t	t	C	C	t	t	t	C	cds817;Name=YP_008637712.1;Parent=gene874;Dbxref=Genbank:YP_008637712.1,GeneID:17149504;gbkey=CDS;product=putative 2-octaprenyl-6-methoxyphenol hydroxylase%2C FAD%2FNAD%28P%29-binding;protein_id=YP_008637712.1;transl_table=11 putative 2-octaprenyl-6-methoxyphenol hydroxylase%2C FAD%2FNAD%28P%29-binding (1016216-1017424 +)	non-silent gtc -> gCc;	1138 1420 1646 1680 1713 1811 2064 220 301 3035 556 557 XCP123
NC_022541.1	1016662	c	c	c	T	c	c	T	c	c	T	c	T	c	T	c	T	c	T	T	c	c	c	c	c	c	c	T	cds817;Name=YP_008637712.1;Parent=gene874;Dbxref=Genbank:YP_008637712.1,GeneID:17149504;gbkey=CDS;product=putative 2-octaprenyl-6-methoxyphenol hydroxylase%2C FAD%2FNAD%28P%29-binding;protein_id=YP_008637712.1;transl_table=11 putative 2-octaprenyl-6-methoxyphenol hydroxylase%2C FAD%2FNAD%28P%29-binding (1016216-1017424 +)	silent gtc -> gtT;	1138 1420 1646 1680 1811 220 301 3035 XCP123
NC_022541.1	1016683	g	g	g	T	g	g	T	g	g	T	g	T	T	T	T	T	g	T	T	g	g	T	T	g	g	g	T	cds817;Name=YP_008637712.1;Parent=gene874;Dbxref=Genbank:YP_008637712.1,GeneID:17149504;gbkey=CDS;product=putative 2-octaprenyl-6-methoxyphenol hydroxylase%2C FAD%2FNAD%28P%29-binding;protein_id=YP_008637712.1;transl_table=11 putative 2-octaprenyl-6-methoxyphenol hydroxylase%2C FAD%2FNAD%28P%29-binding (1016216-1017424 +)	silent cgg -> cgT;	1138 1420 1646 1680 1713 1811 2064 220 301 3035 556 557 XCP123
NC_022541.1	1016695	c	c	c	A	c	c	A	c	c	A	c	A	A	A	A	A	c	A	A	c	c	A	A	c	c	c	A	cds817;Name=YP_008637712.1;Parent=gene874;Dbxref=Genbank:YP_008637712.1,GeneID:17149504;gbkey=CDS;product=putative 2-octaprenyl-6-methoxyphenol hydroxylase%2C FAD%2FNAD%28P%29-binding;protein_id=YP_008637712.1;transl_table=11 putative 2-octaprenyl-6-methoxyphenol hydroxylase%2C FAD%2FNAD%28P%29-binding (1016216-1017424 +)	non-silent aac -> aaA;	1138 1420 1646 1680 1713 1811 2064 220 301 3035 556 557 XCP123
NC_022541.1	1016720	c	c	c	c	c	c	c	c	c	c	c	c	G	c	G	c	c	c	c	c	c	G	G	c	c	c	c	cds817;Name=YP_008637712.1;Parent=gene874;Dbxref=Genbank:YP_008637712.1,GeneID:17149504;gbkey=CDS;product=putative 2-octaprenyl-6-methoxyphenol hydroxylase%2C FAD%2FNAD%28P%29-binding;protein_id=YP_008637712.1;transl_table=11 putative 2-octaprenyl-6-methoxyphenol hydroxylase%2C FAD%2FNAD%28P%29-binding (1016216-1017424 +)	non-silent cac -> Gac;	1713 2064 556 557
NC_022541.1	1016722	c	c	c	T	c	c	T	c	c	T	c	T	T	T	T	T	c	T	T	c	c	T	T	c	c	c	T	cds817;Name=YP_008637712.1;Parent=gene874;Dbxref=Genbank:YP_008637712.1,GeneID:17149504;gbkey=CDS;product=putative 2-octaprenyl-6-methoxyphenol hydroxylase%2C FAD%2FNAD%28P%29-binding;protein_id=YP_008637712.1;transl_table=11 putative 2-octaprenyl-6-methoxyphenol hydroxylase%2C FAD%2FNAD%28P%29-binding (1016216-1017424 +)	silent cac -> caT;	1138 1420 1646 1680 1713 1811 2064 220 301 3035 556 557 XCP123
NC_022541.1	1016759	g	g	g	A	g	g	A	g	g	A	g	A	g	A	g	A	g	A	A	g	g	g	g	g	g	g	A	cds817;Name=YP_008637712.1;Parent=gene874;Dbxref=Genbank:YP_008637712.1,GeneID:17149504;gbkey=CDS;product=putative 2-octaprenyl-6-methoxyphenol hydroxylase%2C FAD%2FNAD%28P%29-binding;protein_id=YP_008637712.1;transl_table=11 putative 2-octaprenyl-6-methoxyphenol hydroxylase%2C FAD%2FNAD%28P%29-binding (1016216-1017424 +)	non-silent gcc -> Acc;	1138 1420 1646 1680 1811 220 301 3035 XCP123
NC_022541.1	1016803	g	g	g	C	g	g	C	g	g	C	g	C	g	C	g	C	g	C	C	g	g	g	g	g	g	g	C	cds817;Name=YP_008637712.1;Parent=gene874;Dbxref=Genbank:YP_008637712.1,GeneID:17149504;gbkey=CDS;product=putative 2-octaprenyl-6-methoxyphenol hydroxylase%2C FAD%2FNAD%28P%29-binding;protein_id=YP_008637712.1;transl_table=11 putative 2-octaprenyl-6-methoxyphenol hydroxylase%2C FAD%2FNAD%28P%29-binding (1016216-1017424 +)	silent gcg -> gcC;	1138 1420 1646 1680 1811 220 301 3035 XCP123
NC_022541.1	1016809	c	c	c	A	c	c	A	c	c	A	c	A	A	A	A	A	c	A	A	c	c	A	A	c	c	c	A	cds817;Name=YP_008637712.1;Parent=gene874;Dbxref=Genbank:YP_008637712.1,GeneID:17149504;gbkey=CDS;product=putative 2-octaprenyl-6-methoxyphenol hydroxylase%2C FAD%2FNAD%28P%29-binding;protein_id=YP_008637712.1;transl_table=11 putative 2-octaprenyl-6-methoxyphenol hydroxylase%2C FAD%2FNAD%28P%29-binding (1016216-1017424 +)	silent cgc -> cgA;	1138 1420 1646 1680 1713 1811 2064 220 301 3035 556 557 XCP123
NC_022541.1	1016845	a	a	a	a	a	a	a	a	a	a	a	a	G	a	G	a	a	a	a	a	a	G	G	a	a	a	a	cds817;Name=YP_008637712.1;Parent=gene874;Dbxref=Genbank:YP_008637712.1,GeneID:17149504;gbkey=CDS;product=putative 2-octaprenyl-6-methoxyphenol hydroxylase%2C FAD%2FNAD%28P%29-binding;protein_id=YP_008637712.1;transl_table=11 putative 2-octaprenyl-6-methoxyphenol hydroxylase%2C FAD%2FNAD%28P%29-binding (1016216-1017424 +)	silent gaa -> gaG;	1713 2064 556 557
NC_022541.1	1016857	c	c	c	G	c	c	G	c	c	G	c	G	c	G	c	G	c	G	G	c	c	c	c	c	c	c	G	cds817;Name=YP_008637712.1;Parent=gene874;Dbxref=Genbank:YP_008637712.1,GeneID:17149504;gbkey=CDS;product=putative 2-octaprenyl-6-methoxyphenol hydroxylase%2C FAD%2FNAD%28P%29-binding;protein_id=YP_008637712.1;transl_table=11 putative 2-octaprenyl-6-methoxyphenol hydroxylase%2C FAD%2FNAD%28P%29-binding (1016216-1017424 +)	silent acc -> acG;	1138 1420 1646 1680 1811 220 301 3035 XCP123
NC_022541.1	1016857	c	c	c	c	c	c	c	c	c	c	c	c	T	c	T	c	c	c	c	c	c	T	T	c	c	c	c	cds817;Name=YP_008637712.1;Parent=gene874;Dbxref=Genbank:YP_008637712.1,GeneID:17149504;gbkey=CDS;product=putative 2-octaprenyl-6-methoxyphenol hydroxylase%2C FAD%2FNAD%28P%29-binding;protein_id=YP_008637712.1;transl_table=11 putative 2-octaprenyl-6-methoxyphenol hydroxylase%2C FAD%2FNAD%28P%29-binding (1016216-1017424 +)	silent acc -> acT;	1713 2064 556 557
NC_022541.1	1016869	g	g	g	A	g	g	A	g	g	A	g	A	g	A	g	A	g	A	A	g	g	g	g	g	g	g	A	cds817;Name=YP_008637712.1;Parent=gene874;Dbxref=Genbank:YP_008637712.1,GeneID:17149504;gbkey=CDS;product=putative 2-octaprenyl-6-methoxyphenol hydroxylase%2C FAD%2FNAD%28P%29-binding;protein_id=YP_008637712.1;transl_table=11 putative 2-octaprenyl-6-methoxyphenol hydroxylase%2C FAD%2FNAD%28P%29-binding (1016216-1017424 +)	silent ccg -> ccA;	1138 1420 1646 1680 1811 220 301 3035 XCP123
NC_022541.1	1016878	t	t	t	C	t	t	C	t	t	C	t	C	C	C	C	C	t	C	C	t	t	C	C	t	t	t	C	cds817;Name=YP_008637712.1;Parent=gene874;Dbxref=Genbank:YP_008637712.1,GeneID:17149504;gbkey=CDS;product=putative 2-octaprenyl-6-methoxyphenol hydroxylase%2C FAD%2FNAD%28P%29-binding;protein_id=YP_008637712.1;transl_table=11 putative 2-octaprenyl-6-methoxyphenol hydroxylase%2C FAD%2FNAD%28P%29-binding (1016216-1017424 +)	silent gat -> gaC;	1138 1420 1646 1680 1713 1811 2064 220 301 3035 556 557 XCP123
NC_022541.1	1016881	c	c	c	T	c	c	T	c	c	T	c	T	c	T	c	T	c	T	T	c	c	c	c	c	c	c	T	cds817;Name=YP_008637712.1;Parent=gene874;Dbxref=Genbank:YP_008637712.1,GeneID:17149504;gbkey=CDS;product=putative 2-octaprenyl-6-methoxyphenol hydroxylase%2C FAD%2FNAD%28P%29-binding;protein_id=YP_008637712.1;transl_table=11 putative 2-octaprenyl-6-methoxyphenol hydroxylase%2C FAD%2FNAD%28P%29-binding (1016216-1017424 +)	silent cgc -> cgT;	1138 1420 1646 1680 1811 220 301 3035 XCP123
NC_022541.1	1016890	c	c	c	T	c	c	T	c	c	T	c	T	c	T	c	T	c	T	T	c	c	c	c	c	c	c	T	cds817;Name=YP_008637712.1;Parent=gene874;Dbxref=Genbank:YP_008637712.1,GeneID:17149504;gbkey=CDS;product=putative 2-octaprenyl-6-methoxyphenol hydroxylase%2C FAD%2FNAD%28P%29-binding;protein_id=YP_008637712.1;transl_table=11 putative 2-octaprenyl-6-methoxyphenol hydroxylase%2C FAD%2FNAD%28P%29-binding (1016216-1017424 +)	silent ggc -> ggT;	1138 1420 1646 1680 1811 220 301 3035 XCP123
NC_022541.1	1016941	c	c	c	T	c	c	T	c	c	T	c	T	c	T	c	T	c	T	T	c	c	c	c	c	c	c	T	cds817;Name=YP_008637712.1;Parent=gene874;Dbxref=Genbank:YP_008637712.1,GeneID:17149504;gbkey=CDS;product=putative 2-octaprenyl-6-methoxyphenol hydroxylase%2C FAD%2FNAD%28P%29-binding;protein_id=YP_008637712.1;transl_table=11 putative 2-octaprenyl-6-methoxyphenol hydroxylase%2C FAD%2FNAD%28P%29-binding (1016216-1017424 +)	silent gac -> gaT;	1138 1420 1646 1680 1811 220 301 3035 XCP123
NC_022541.1	1016945	g	g	g	A	g	g	A	g	g	A	g	A	g	A	g	A	g	A	A	g	g	g	g	g	g	g	A	cds817;Name=YP_008637712.1;Parent=gene874;Dbxref=Genbank:YP_008637712.1,GeneID:17149504;gbkey=CDS;product=putative 2-octaprenyl-6-methoxyphenol hydroxylase%2C FAD%2FNAD%28P%29-binding;protein_id=YP_008637712.1;transl_table=11 putative 2-octaprenyl-6-methoxyphenol hydroxylase%2C FAD%2FNAD%28P%29-binding (1016216-1017424 +)	non-silent gcc -> Acc;	1138 1420 1646 1680 1811 220 301 3035 XCP123
NC_022541.1	1016959	c	c	c	G	c	c	G	c	c	G	c	G	c	G	c	G	c	G	G	c	c	c	c	c	c	c	G	cds817;Name=YP_008637712.1;Parent=gene874;Dbxref=Genbank:YP_008637712.1,GeneID:17149504;gbkey=CDS;product=putative 2-octaprenyl-6-methoxyphenol hydroxylase%2C FAD%2FNAD%28P%29-binding;protein_id=YP_008637712.1;transl_table=11 putative 2-octaprenyl-6-methoxyphenol hydroxylase%2C FAD%2FNAD%28P%29-binding (1016216-1017424 +)	silent gcc -> gcG;	1138 1420 1646 1680 1811 220 301 3035 XCP123
NC_022541.1	1017	c	c	c	T	c	c	T	c	c	T	c	T	c	T	c	T	c	T	T	c	c	c	c	c	c	c	T	cds0;Name=YP_008636895.1;Parent=gene0;Dbxref=Genbank:YP_008636895.1,GeneID:17148934;gbkey=CDS;gene=dnaA;product=chromosomal replication initiator protein DnaA;protein_id=YP_008636895.1;transl_table=11 chromosomal replication initiator protein DnaA (1-1329 +)	silent cgc -> cgT;	1138 1420 1646 1680 1811 220 301 3035 XCP123
NC_022541.1	1017006	g	g	g	C	g	g	C	g	g	C	g	C	g	C	g	C	g	C	C	g	g	g	g	g	g	g	C	cds817;Name=YP_008637712.1;Parent=gene874;Dbxref=Genbank:YP_008637712.1,GeneID:17149504;gbkey=CDS;product=putative 2-octaprenyl-6-methoxyphenol hydroxylase%2C FAD%2FNAD%28P%29-binding;protein_id=YP_008637712.1;transl_table=11 putative 2-octaprenyl-6-methoxyphenol hydroxylase%2C FAD%2FNAD%28P%29-binding (1016216-1017424 +)	non-silent agc -> aCc;	1138 1420 1646 1680 1811 220 301 3035 XCP123
NC_022541.1	1017013	g	g	g	A	g	g	A	g	g	A	g	A	g	A	g	A	g	A	A	g	g	g	g	g	g	g	A	cds817;Name=YP_008637712.1;Parent=gene874;Dbxref=Genbank:YP_008637712.1,GeneID:17149504;gbkey=CDS;product=putative 2-octaprenyl-6-methoxyphenol hydroxylase%2C FAD%2FNAD%28P%29-binding;protein_id=YP_008637712.1;transl_table=11 putative 2-octaprenyl-6-methoxyphenol hydroxylase%2C FAD%2FNAD%28P%29-binding (1016216-1017424 +)	silent gag -> gaA;	1138 1420 1646 1680 1811 220 301 3035 XCP123
NC_022541.1	1017019	c	c	c	T	c	c	T	c	c	T	c	T	T	T	T	T	c	T	T	c	c	T	T	c	c	c	T	cds817;Name=YP_008637712.1;Parent=gene874;Dbxref=Genbank:YP_008637712.1,GeneID:17149504;gbkey=CDS;product=putative 2-octaprenyl-6-methoxyphenol hydroxylase%2C FAD%2FNAD%28P%29-binding;protein_id=YP_008637712.1;transl_table=11 putative 2-octaprenyl-6-methoxyphenol hydroxylase%2C FAD%2FNAD%28P%29-binding (1016216-1017424 +)	silent agc -> agT;	1138 1420 1646 1680 1713 1811 2064 220 301 3035 556 557 XCP123
NC_022541.1	1017064	a	a	a	G	a	a	G	a	a	G	a	G	a	G	a	G	a	G	G	a	a	a	a	a	a	a	G	cds817;Name=YP_008637712.1;Parent=gene874;Dbxref=Genbank:YP_008637712.1,GeneID:17149504;gbkey=CDS;product=putative 2-octaprenyl-6-methoxyphenol hydroxylase%2C FAD%2FNAD%28P%29-binding;protein_id=YP_008637712.1;transl_table=11 putative 2-octaprenyl-6-methoxyphenol hydroxylase%2C FAD%2FNAD%28P%29-binding (1016216-1017424 +)	silent gaa -> gaG;	1138 1420 1646 1680 1811 220 301 3035 XCP123
NC_022541.1	1017088	g	g	g	C	g	g	C	g	g	C	g	C	g	C	g	C	g	C	C	g	g	g	g	g	g	g	C	cds817;Name=YP_008637712.1;Parent=gene874;Dbxref=Genbank:YP_008637712.1,GeneID:17149504;gbkey=CDS;product=putative 2-octaprenyl-6-methoxyphenol hydroxylase%2C FAD%2FNAD%28P%29-binding;protein_id=YP_008637712.1;transl_table=11 putative 2-octaprenyl-6-methoxyphenol hydroxylase%2C FAD%2FNAD%28P%29-binding (1016216-1017424 +)	silent gcg -> gcC;	1138 1420 1646 1680 1811 220 301 3035 XCP123
NC_022541.1	10171	g	g	g	g	g	g	g	g	g	g	g	g	C	g	C	g	g	g	g	g	g	C	C	g	g	g	g	cds6;Name=YP_008636901.1;Parent=gene6;Dbxref=Genbank:YP_008636901.1,GeneID:17148936;gbkey=CDS;product=hypothetical protein;protein_id=YP_008636901.1;transl_table=11 hypothetical protein (9578-10771 +)	silent gcg -> gcC;	1713 2064 556 557
NC_022541.1	1017103	t	t	t	C	t	t	C	t	t	C	t	C	t	C	t	C	t	C	C	t	t	t	t	t	t	t	C	cds817;Name=YP_008637712.1;Parent=gene874;Dbxref=Genbank:YP_008637712.1,GeneID:17149504;gbkey=CDS;product=putative 2-octaprenyl-6-methoxyphenol hydroxylase%2C FAD%2FNAD%28P%29-binding;protein_id=YP_008637712.1;transl_table=11 putative 2-octaprenyl-6-methoxyphenol hydroxylase%2C FAD%2FNAD%28P%29-binding (1016216-1017424 +)	silent cat -> caC;	1138 1420 1646 1680 1811 220 301 3035 XCP123
NC_022541.1	1017121	c	c	c	c	c	c	c	c	c	c	c	c	T	c	T	c	c	c	c	c	c	T	T	c	c	c	c	cds817;Name=YP_008637712.1;Parent=gene874;Dbxref=Genbank:YP_008637712.1,GeneID:17149504;gbkey=CDS;product=putative 2-octaprenyl-6-methoxyphenol hydroxylase%2C FAD%2FNAD%28P%29-binding;protein_id=YP_008637712.1;transl_table=11 putative 2-octaprenyl-6-methoxyphenol hydroxylase%2C FAD%2FNAD%28P%29-binding (1016216-1017424 +)	silent ggc -> ggT;	1713 2064 556 557
NC_022541.1	1017134	t	t	t	C	t	t	C	t	t	C	t	C	t	C	t	C	t	C	C	t	t	t	t	t	t	t	C	cds817;Name=YP_008637712.1;Parent=gene874;Dbxref=Genbank:YP_008637712.1,GeneID:17149504;gbkey=CDS;product=putative 2-octaprenyl-6-methoxyphenol hydroxylase%2C FAD%2FNAD%28P%29-binding;protein_id=YP_008637712.1;transl_table=11 putative 2-octaprenyl-6-methoxyphenol hydroxylase%2C FAD%2FNAD%28P%29-binding (1016216-1017424 +)	silent ttg -> Ctg;	1138 1420 1646 1680 1811 220 301 3035 XCP123
NC_022541.1	1017235	c	c	c	T	c	c	T	c	c	T	c	T	c	T	c	T	c	T	T	c	c	c	c	c	c	c	T	cds817;Name=YP_008637712.1;Parent=gene874;Dbxref=Genbank:YP_008637712.1,GeneID:17149504;gbkey=CDS;product=putative 2-octaprenyl-6-methoxyphenol hydroxylase%2C FAD%2FNAD%28P%29-binding;protein_id=YP_008637712.1;transl_table=11 putative 2-octaprenyl-6-methoxyphenol hydroxylase%2C FAD%2FNAD%28P%29-binding (1016216-1017424 +)	silent gac -> gaT;	1138 1420 1646 1680 1811 220 301 3035 XCP123
NC_022541.1	1017292	a	a	a	a	a	a	a	a	a	a	a	a	G	a	G	a	a	a	a	a	a	G	G	a	a	a	a	cds817;Name=YP_008637712.1;Parent=gene874;Dbxref=Genbank:YP_008637712.1,GeneID:17149504;gbkey=CDS;product=putative 2-octaprenyl-6-methoxyphenol hydroxylase%2C FAD%2FNAD%28P%29-binding;protein_id=YP_008637712.1;transl_table=11 putative 2-octaprenyl-6-methoxyphenol hydroxylase%2C FAD%2FNAD%28P%29-binding (1016216-1017424 +)	silent gca -> gcG;	1713 2064 556 557
NC_022541.1	1017373	t	t	t	C	t	t	C	t	t	C	t	C	t	C	t	C	t	C	C	t	t	t	t	t	t	t	C	cds817;Name=YP_008637712.1;Parent=gene874;Dbxref=Genbank:YP_008637712.1,GeneID:17149504;gbkey=CDS;product=putative 2-octaprenyl-6-methoxyphenol hydroxylase%2C FAD%2FNAD%28P%29-binding;protein_id=YP_008637712.1;transl_table=11 putative 2-octaprenyl-6-methoxyphenol hydroxylase%2C FAD%2FNAD%28P%29-binding (1016216-1017424 +)	silent ggt -> ggC;	1138 1420 1646 1680 1811 220 301 3035 XCP123
NC_022541.1	1017400	g	g	g	A	g	g	A	g	g	A	g	A	g	A	g	A	g	A	A	g	g	g	g	g	g	g	A	cds817;Name=YP_008637712.1;Parent=gene874;Dbxref=Genbank:YP_008637712.1,GeneID:17149504;gbkey=CDS;product=putative 2-octaprenyl-6-methoxyphenol hydroxylase%2C FAD%2FNAD%28P%29-binding;protein_id=YP_008637712.1;transl_table=11 putative 2-octaprenyl-6-methoxyphenol hydroxylase%2C FAD%2FNAD%28P%29-binding (1016216-1017424 +)	silent ccg -> ccA;	1138 1420 1646 1680 1811 220 301 3035 XCP123
NC_022541.1	1017413	a	a	a	G	a	a	G	a	a	G	a	G	a	G	a	G	a	G	G	a	a	a	a	a	a	a	G	cds817;Name=YP_008637712.1;Parent=gene874;Dbxref=Genbank:YP_008637712.1,GeneID:17149504;gbkey=CDS;product=putative 2-octaprenyl-6-methoxyphenol hydroxylase%2C FAD%2FNAD%28P%29-binding;protein_id=YP_008637712.1;transl_table=11 putative 2-octaprenyl-6-methoxyphenol hydroxylase%2C FAD%2FNAD%28P%29-binding (1016216-1017424 +)	non-silent agc -> Ggc;	1138 1420 1646 1680 1811 220 301 3035 XCP123
NC_022541.1	1017446	c	c	c	T	c	c	T	c	c	T	c	T	c	T	c	T	c	T	T	c	c	c	c	c	c	c	T	cds818;Name=YP_008637713.1;Parent=gene875;Dbxref=Genbank:YP_008637713.1,GeneID:17149505;gbkey=CDS;product=putative 2-octaprenyl-3-methyl-6-methoxy-1%2C4-benzoquinol hydroxylase;protein_id=YP_008637713.1;transl_table=11 putative 2-octaprenyl-3-methyl-6-methoxy-1%2C4-benzoquinol hydroxylase (1017421-1018602 +)	non-silent gcc -> gTc;	1138 1420 1646 1680 1811 220 301 3035 XCP123
NC_022541.1	1017447	c	c	c	G	c	c	G	c	c	G	c	G	c	G	c	G	c	G	G	c	c	c	c	c	c	c	G	cds818;Name=YP_008637713.1;Parent=gene875;Dbxref=Genbank:YP_008637713.1,GeneID:17149505;gbkey=CDS;product=putative 2-octaprenyl-3-methyl-6-methoxy-1%2C4-benzoquinol hydroxylase;protein_id=YP_008637713.1;transl_table=11 putative 2-octaprenyl-3-methyl-6-methoxy-1%2C4-benzoquinol hydroxylase (1017421-1018602 +)	silent gcc -> gcG;	1138 1420 1646 1680 1811 220 301 3035 XCP123
NC_022541.1	1017477	g	g	g	C	g	g	C	g	g	C	g	C	g	C	g	C	g	C	C	g	g	g	g	g	g	g	C	cds818;Name=YP_008637713.1;Parent=gene875;Dbxref=Genbank:YP_008637713.1,GeneID:17149505;gbkey=CDS;product=putative 2-octaprenyl-3-methyl-6-methoxy-1%2C4-benzoquinol hydroxylase;protein_id=YP_008637713.1;transl_table=11 putative 2-octaprenyl-3-methyl-6-methoxy-1%2C4-benzoquinol hydroxylase (1017421-1018602 +)	silent gcg -> gcC;	1138 1420 1646 1680 1811 220 301 3035 XCP123
NC_022541.1	1017492	g	g	g	A	g	g	A	g	g	A	g	A	g	A	g	A	g	A	A	g	g	g	g	g	g	g	A	cds818;Name=YP_008637713.1;Parent=gene875;Dbxref=Genbank:YP_008637713.1,GeneID:17149505;gbkey=CDS;product=putative 2-octaprenyl-3-methyl-6-methoxy-1%2C4-benzoquinol hydroxylase;protein_id=YP_008637713.1;transl_table=11 putative 2-octaprenyl-3-methyl-6-methoxy-1%2C4-benzoquinol hydroxylase (1017421-1018602 +)	silent gcg -> gcA;	1138 1420 1646 1680 1811 220 301 3035 XCP123
NC_022541.1	1017507	c	c	c	c	c	c	c	c	c	c	c	c	G	c	G	c	c	c	c	c	c	G	G	c	c	c	c	cds818;Name=YP_008637713.1;Parent=gene875;Dbxref=Genbank:YP_008637713.1,GeneID:17149505;gbkey=CDS;product=putative 2-octaprenyl-3-methyl-6-methoxy-1%2C4-benzoquinol hydroxylase;protein_id=YP_008637713.1;transl_table=11 putative 2-octaprenyl-3-methyl-6-methoxy-1%2C4-benzoquinol hydroxylase (1017421-1018602 +)	silent ggc -> ggG;	1713 2064 556 557
NC_022541.1	1017511	c	c	c	c	c	c	c	c	c	c	c	c	A	c	A	c	c	c	c	c	c	A	A	c	c	c	c	cds818;Name=YP_008637713.1;Parent=gene875;Dbxref=Genbank:YP_008637713.1,GeneID:17149505;gbkey=CDS;product=putative 2-octaprenyl-3-methyl-6-methoxy-1%2C4-benzoquinol hydroxylase;protein_id=YP_008637713.1;transl_table=11 putative 2-octaprenyl-3-methyl-6-methoxy-1%2C4-benzoquinol hydroxylase (1017421-1018602 +)	non-silent cgc -> Agc;	1713 2064 556 557
NC_022541.1	1017523	g	g	g	A	g	g	A	g	g	A	g	A	g	A	g	A	g	A	A	g	g	g	g	g	g	g	A	cds818;Name=YP_008637713.1;Parent=gene875;Dbxref=Genbank:YP_008637713.1,GeneID:17149505;gbkey=CDS;product=putative 2-octaprenyl-3-methyl-6-methoxy-1%2C4-benzoquinol hydroxylase;protein_id=YP_008637713.1;transl_table=11 putative 2-octaprenyl-3-methyl-6-methoxy-1%2C4-benzoquinol hydroxylase (1017421-1018602 +)	non-silent gtc -> Atc;	1138 1420 1646 1680 1811 220 301 3035 XCP123
NC_022541.1	1017540	a	a	a	T	a	a	T	a	a	T	a	T	T	T	T	T	a	T	T	a	a	T	T	a	a	a	T	cds818;Name=YP_008637713.1;Parent=gene875;Dbxref=Genbank:YP_008637713.1,GeneID:17149505;gbkey=CDS;product=putative 2-octaprenyl-3-methyl-6-methoxy-1%2C4-benzoquinol hydroxylase;protein_id=YP_008637713.1;transl_table=11 putative 2-octaprenyl-3-methyl-6-methoxy-1%2C4-benzoquinol hydroxylase (1017421-1018602 +)	silent cca -> ccT;	1138 1420 1646 1680 1713 1811 2064 220 301 3035 556 557 XCP123
NC_022541.1	1017543	g	g	g	g	g	g	g	g	g	g	g	g	A	g	A	g	g	g	g	g	g	A	A	g	g	g	g	cds818;Name=YP_008637713.1;Parent=gene875;Dbxref=Genbank:YP_008637713.1,GeneID:17149505;gbkey=CDS;product=putative 2-octaprenyl-3-methyl-6-methoxy-1%2C4-benzoquinol hydroxylase;protein_id=YP_008637713.1;transl_table=11 putative 2-octaprenyl-3-methyl-6-methoxy-1%2C4-benzoquinol hydroxylase (1017421-1018602 +)	silent gcg -> gcA;	1713 2064 556 557
NC_022541.1	1017543	g	g	g	C	g	g	C	g	g	C	g	C	g	C	g	C	g	C	C	g	g	g	g	g	g	g	C	cds818;Name=YP_008637713.1;Parent=gene875;Dbxref=Genbank:YP_008637713.1,GeneID:17149505;gbkey=CDS;product=putative 2-octaprenyl-3-methyl-6-methoxy-1%2C4-benzoquinol hydroxylase;protein_id=YP_008637713.1;transl_table=11 putative 2-octaprenyl-3-methyl-6-methoxy-1%2C4-benzoquinol hydroxylase (1017421-1018602 +)	silent gcg -> gcC;	1138 1420 1646 1680 1811 220 301 3035 XCP123
NC_022541.1	1017551	a	a	a	G	a	a	G	a	a	G	a	G	a	G	a	G	a	G	G	a	a	a	a	a	a	a	G	cds818;Name=YP_008637713.1;Parent=gene875;Dbxref=Genbank:YP_008637713.1,GeneID:17149505;gbkey=CDS;product=putative 2-octaprenyl-3-methyl-6-methoxy-1%2C4-benzoquinol hydroxylase;protein_id=YP_008637713.1;transl_table=11 putative 2-octaprenyl-3-methyl-6-methoxy-1%2C4-benzoquinol hydroxylase (1017421-1018602 +)	non-silent aac -> aGc;	1138 1420 1646 1680 1811 220 301 3035 XCP123
NC_022541.1	1017558	t	t	t	G	t	t	G	t	t	G	t	G	t	G	t	G	t	G	G	t	t	t	t	t	t	t	G	cds818;Name=YP_008637713.1;Parent=gene875;Dbxref=Genbank:YP_008637713.1,GeneID:17149505;gbkey=CDS;product=putative 2-octaprenyl-3-methyl-6-methoxy-1%2C4-benzoquinol hydroxylase;protein_id=YP_008637713.1;transl_table=11 putative 2-octaprenyl-3-methyl-6-methoxy-1%2C4-benzoquinol hydroxylase (1017421-1018602 +)	non-silent gat -> gaG;	1138 1420 1646 1680 1811 220 301 3035 XCP123
NC_022541.1	1017573	t	t	t	C	t	t	C	t	t	C	t	C	C	C	C	C	t	C	C	t	t	C	C	t	t	t	C	cds818;Name=YP_008637713.1;Parent=gene875;Dbxref=Genbank:YP_008637713.1,GeneID:17149505;gbkey=CDS;product=putative 2-octaprenyl-3-methyl-6-methoxy-1%2C4-benzoquinol hydroxylase;protein_id=YP_008637713.1;transl_table=11 putative 2-octaprenyl-3-methyl-6-methoxy-1%2C4-benzoquinol hydroxylase (1017421-1018602 +)	silent cgt -> cgC;	1138 1420 1646 1680 1713 1811 2064 220 301 3035 556 557 XCP123
NC_022541.1	1017579	t	t	t	t	t	t	t	t	t	t	t	t	C	t	C	t	t	t	t	t	t	C	C	t	t	t	t	cds818;Name=YP_008637713.1;Parent=gene875;Dbxref=Genbank:YP_008637713.1,GeneID:17149505;gbkey=CDS;product=putative 2-octaprenyl-3-methyl-6-methoxy-1%2C4-benzoquinol hydroxylase;protein_id=YP_008637713.1;transl_table=11 putative 2-octaprenyl-3-methyl-6-methoxy-1%2C4-benzoquinol hydroxylase (1017421-1018602 +)	silent tat -> taC;	1713 2064 556 557
NC_022541.1	1017588	c	c	c	T	c	c	T	c	c	T	c	T	c	T	c	T	c	T	T	c	c	c	c	c	c	c	T	cds818;Name=YP_008637713.1;Parent=gene875;Dbxref=Genbank:YP_008637713.1,GeneID:17149505;gbkey=CDS;product=putative 2-octaprenyl-3-methyl-6-methoxy-1%2C4-benzoquinol hydroxylase;protein_id=YP_008637713.1;transl_table=11 putative 2-octaprenyl-3-methyl-6-methoxy-1%2C4-benzoquinol hydroxylase (1017421-1018602 +)	silent gcc -> gcT;	1138 1420 1646 1680 1811 220 301 3035 XCP123
NC_022541.1	1017597	c	c	c	T	c	c	T	c	c	T	c	T	c	T	c	T	c	T	T	c	c	c	c	c	c	c	T	cds818;Name=YP_008637713.1;Parent=gene875;Dbxref=Genbank:YP_008637713.1,GeneID:17149505;gbkey=CDS;product=putative 2-octaprenyl-3-methyl-6-methoxy-1%2C4-benzoquinol hydroxylase;protein_id=YP_008637713.1;transl_table=11 putative 2-octaprenyl-3-methyl-6-methoxy-1%2C4-benzoquinol hydroxylase (1017421-1018602 +)	silent aac -> aaT;	1138 1420 1646 1680 1811 220 301 3035 XCP123
NC_022541.1	1017603	a	a	a	G	a	a	G	a	a	G	a	G	G	G	G	G	a	G	G	a	a	G	G	a	a	a	G	cds818;Name=YP_008637713.1;Parent=gene875;Dbxref=Genbank:YP_008637713.1,GeneID:17149505;gbkey=CDS;product=putative 2-octaprenyl-3-methyl-6-methoxy-1%2C4-benzoquinol hydroxylase;protein_id=YP_008637713.1;transl_table=11 putative 2-octaprenyl-3-methyl-6-methoxy-1%2C4-benzoquinol hydroxylase (1017421-1018602 +)	silent gca -> gcG;	1138 1420 1646 1680 1713 1811 2064 220 301 3035 556 557 XCP123
NC_022541.1	1017638	g	g	g	g	g	g	g	g	g	g	g	g	g	g	g	g	g	g	g	g	A	g	g	g	g	g	g	cds818;Name=YP_008637713.1;Parent=gene875;Dbxref=Genbank:YP_008637713.1,GeneID:17149505;gbkey=CDS;product=putative 2-octaprenyl-3-methyl-6-methoxy-1%2C4-benzoquinol hydroxylase;protein_id=YP_008637713.1;transl_table=11 putative 2-octaprenyl-3-methyl-6-methoxy-1%2C4-benzoquinol hydroxylase (1017421-1018602 +)	non-silent cgt -> cAt;	381
NC_022541.1	1017645	g	g	g	g	g	g	g	g	g	g	g	g	T	g	T	g	g	g	g	g	g	T	T	g	g	g	g	cds818;Name=YP_008637713.1;Parent=gene875;Dbxref=Genbank:YP_008637713.1,GeneID:17149505;gbkey=CDS;product=putative 2-octaprenyl-3-methyl-6-methoxy-1%2C4-benzoquinol hydroxylase;protein_id=YP_008637713.1;transl_table=11 putative 2-octaprenyl-3-methyl-6-methoxy-1%2C4-benzoquinol hydroxylase (1017421-1018602 +)	silent gcg -> gcT;	1713 2064 556 557
NC_022541.1	1017654	a	a	a	a	a	a	a	a	a	a	a	a	G	a	G	a	a	a	a	a	a	G	G	a	a	a	a	cds818;Name=YP_008637713.1;Parent=gene875;Dbxref=Genbank:YP_008637713.1,GeneID:17149505;gbkey=CDS;product=putative 2-octaprenyl-3-methyl-6-methoxy-1%2C4-benzoquinol hydroxylase;protein_id=YP_008637713.1;transl_table=11 putative 2-octaprenyl-3-methyl-6-methoxy-1%2C4-benzoquinol hydroxylase (1017421-1018602 +)	silent caa -> caG;	1713 2064 556 557
NC_022541.1	1017660	c	c	c	T	c	c	T	c	c	T	c	T	c	T	c	T	c	T	T	c	c	c	c	c	c	c	T	cds818;Name=YP_008637713.1;Parent=gene875;Dbxref=Genbank:YP_008637713.1,GeneID:17149505;gbkey=CDS;product=putative 2-octaprenyl-3-methyl-6-methoxy-1%2C4-benzoquinol hydroxylase;protein_id=YP_008637713.1;transl_table=11 putative 2-octaprenyl-3-methyl-6-methoxy-1%2C4-benzoquinol hydroxylase (1017421-1018602 +)	silent tac -> taT;	1138 1420 1646 1680 1811 220 301 3035 XCP123
NC_022541.1	1017684	t	t	t	G	t	t	G	t	t	G	t	G	t	G	t	G	t	G	G	t	t	t	t	t	t	t	G	cds818;Name=YP_008637713.1;Parent=gene875;Dbxref=Genbank:YP_008637713.1,GeneID:17149505;gbkey=CDS;product=putative 2-octaprenyl-3-methyl-6-methoxy-1%2C4-benzoquinol hydroxylase;protein_id=YP_008637713.1;transl_table=11 putative 2-octaprenyl-3-methyl-6-methoxy-1%2C4-benzoquinol hydroxylase (1017421-1018602 +)	silent gct -> gcG;	1138 1420 1646 1680 1811 220 301 3035 XCP123
NC_022541.1	1017693	t	t	t	t	t	t	t	t	t	t	t	t	C	t	C	t	t	t	t	t	t	C	C	t	t	t	t	cds818;Name=YP_008637713.1;Parent=gene875;Dbxref=Genbank:YP_008637713.1,GeneID:17149505;gbkey=CDS;product=putative 2-octaprenyl-3-methyl-6-methoxy-1%2C4-benzoquinol hydroxylase;protein_id=YP_008637713.1;transl_table=11 putative 2-octaprenyl-3-methyl-6-methoxy-1%2C4-benzoquinol hydroxylase (1017421-1018602 +)	silent ggt -> ggC;	1713 2064 556 557
NC_022541.1	1017696	c	c	c	c	c	c	c	c	c	c	c	c	A	c	A	c	c	c	c	c	c	A	A	c	c	c	c	cds818;Name=YP_008637713.1;Parent=gene875;Dbxref=Genbank:YP_008637713.1,GeneID:17149505;gbkey=CDS;product=putative 2-octaprenyl-3-methyl-6-methoxy-1%2C4-benzoquinol hydroxylase;protein_id=YP_008637713.1;transl_table=11 putative 2-octaprenyl-3-methyl-6-methoxy-1%2C4-benzoquinol hydroxylase (1017421-1018602 +)	silent ggc -> ggA;	1713 2064 556 557
NC_022541.1	1017711	c	c	c	c	c	c	c	c	c	c	c	c	T	c	T	c	c	c	c	c	c	T	T	c	c	c	c	cds818;Name=YP_008637713.1;Parent=gene875;Dbxref=Genbank:YP_008637713.1,GeneID:17149505;gbkey=CDS;product=putative 2-octaprenyl-3-methyl-6-methoxy-1%2C4-benzoquinol hydroxylase;protein_id=YP_008637713.1;transl_table=11 putative 2-octaprenyl-3-methyl-6-methoxy-1%2C4-benzoquinol hydroxylase (1017421-1018602 +)	silent gac -> gaT;	1713 2064 556 557
NC_022541.1	1017720	g	g	g	C	g	g	C	g	g	C	g	C	g	C	g	C	g	C	C	g	g	g	g	g	g	g	C	cds818;Name=YP_008637713.1;Parent=gene875;Dbxref=Genbank:YP_008637713.1,GeneID:17149505;gbkey=CDS;product=putative 2-octaprenyl-3-methyl-6-methoxy-1%2C4-benzoquinol hydroxylase;protein_id=YP_008637713.1;transl_table=11 putative 2-octaprenyl-3-methyl-6-methoxy-1%2C4-benzoquinol hydroxylase (1017421-1018602 +)	silent acg -> acC;	1138 1420 1646 1680 1811 220 301 3035 XCP123
NC_022541.1	1017775	t	t	t	C	t	t	C	t	t	C	t	C	t	C	t	C	t	C	C	t	t	t	t	t	t	t	C	cds818;Name=YP_008637713.1;Parent=gene875;Dbxref=Genbank:YP_008637713.1,GeneID:17149505;gbkey=CDS;product=putative 2-octaprenyl-3-methyl-6-methoxy-1%2C4-benzoquinol hydroxylase;protein_id=YP_008637713.1;transl_table=11 putative 2-octaprenyl-3-methyl-6-methoxy-1%2C4-benzoquinol hydroxylase (1017421-1018602 +)	silent ttg -> Ctg;	1138 1420 1646 1680 1811 220 301 3035 XCP123
NC_022541.1	1017792	t	t	t	C	t	t	C	t	t	C	t	C	t	C	t	C	t	C	C	t	t	t	t	t	t	t	C	cds818;Name=YP_008637713.1;Parent=gene875;Dbxref=Genbank:YP_008637713.1,GeneID:17149505;gbkey=CDS;product=putative 2-octaprenyl-3-methyl-6-methoxy-1%2C4-benzoquinol hydroxylase;protein_id=YP_008637713.1;transl_table=11 putative 2-octaprenyl-3-methyl-6-methoxy-1%2C4-benzoquinol hydroxylase (1017421-1018602 +)	silent cat -> caC;	1138 1420 1646 1680 1811 220 301 3035 XCP123
NC_022541.1	1017805	g	g	g	g	g	g	g	g	g	g	g	g	C	g	C	g	g	g	g	g	g	C	C	g	g	g	g	cds818;Name=YP_008637713.1;Parent=gene875;Dbxref=Genbank:YP_008637713.1,GeneID:17149505;gbkey=CDS;product=putative 2-octaprenyl-3-methyl-6-methoxy-1%2C4-benzoquinol hydroxylase;protein_id=YP_008637713.1;transl_table=11 putative 2-octaprenyl-3-methyl-6-methoxy-1%2C4-benzoquinol hydroxylase (1017421-1018602 +)	non-silent gaa -> Caa;	1713 2064 556 557
NC_022541.1	1017812	g	g	g	A	g	g	A	g	g	A	g	A	A	A	A	A	g	A	A	g	g	A	A	g	g	g	A	cds818;Name=YP_008637713.1;Parent=gene875;Dbxref=Genbank:YP_008637713.1,GeneID:17149505;gbkey=CDS;product=putative 2-octaprenyl-3-methyl-6-methoxy-1%2C4-benzoquinol hydroxylase;protein_id=YP_008637713.1;transl_table=11 putative 2-octaprenyl-3-methyl-6-methoxy-1%2C4-benzoquinol hydroxylase (1017421-1018602 +)	non-silent cgt -> cAt;	1138 1420 1646 1680 1713 1811 2064 220 301 3035 556 557 XCP123
NC_022541.1	1017849	c	c	c	c	c	c	c	c	c	c	c	c	T	c	T	c	c	c	c	c	c	T	T	c	c	c	c	cds818;Name=YP_008637713.1;Parent=gene875;Dbxref=Genbank:YP_008637713.1,GeneID:17149505;gbkey=CDS;product=putative 2-octaprenyl-3-methyl-6-methoxy-1%2C4-benzoquinol hydroxylase;protein_id=YP_008637713.1;transl_table=11 putative 2-octaprenyl-3-methyl-6-methoxy-1%2C4-benzoquinol hydroxylase (1017421-1018602 +)	silent gcc -> gcT;	1713 2064 556 557
NC_022541.1	1017856	a	a	a	G	a	a	G	a	a	G	a	G	G	G	G	G	a	G	G	a	a	G	G	a	a	a	G	cds818;Name=YP_008637713.1;Parent=gene875;Dbxref=Genbank:YP_008637713.1,GeneID:17149505;gbkey=CDS;product=putative 2-octaprenyl-3-methyl-6-methoxy-1%2C4-benzoquinol hydroxylase;protein_id=YP_008637713.1;transl_table=11 putative 2-octaprenyl-3-methyl-6-methoxy-1%2C4-benzoquinol hydroxylase (1017421-1018602 +)	non-silent atg -> Gtg;	1138 1420 1646 1680 1713 1811 2064 220 301 3035 556 557 XCP123
NC_022541.1	1017894	c	c	c	G	c	c	G	c	c	G	c	G	G	G	G	G	c	G	G	c	c	G	G	c	c	c	G	cds818;Name=YP_008637713.1;Parent=gene875;Dbxref=Genbank:YP_008637713.1,GeneID:17149505;gbkey=CDS;product=putative 2-octaprenyl-3-methyl-6-methoxy-1%2C4-benzoquinol hydroxylase;protein_id=YP_008637713.1;transl_table=11 putative 2-octaprenyl-3-methyl-6-methoxy-1%2C4-benzoquinol hydroxylase (1017421-1018602 +)	silent gcc -> gcG;	1138 1420 1646 1680 1713 1811 2064 220 301 3035 556 557 XCP123
NC_022541.1	1017912	t	t	t	C	t	t	C	t	t	C	t	C	C	C	C	C	t	C	C	t	t	C	C	t	t	t	C	cds818;Name=YP_008637713.1;Parent=gene875;Dbxref=Genbank:YP_008637713.1,GeneID:17149505;gbkey=CDS;product=putative 2-octaprenyl-3-methyl-6-methoxy-1%2C4-benzoquinol hydroxylase;protein_id=YP_008637713.1;transl_table=11 putative 2-octaprenyl-3-methyl-6-methoxy-1%2C4-benzoquinol hydroxylase (1017421-1018602 +)	silent gct -> gcC;	1138 1420 1646 1680 1713 1811 2064 220 301 3035 556 557 XCP123
NC_022541.1	1017921	a	a	a	G	a	a	G	a	a	G	a	G	a	G	a	G	a	G	G	a	a	a	a	a	a	a	G	cds818;Name=YP_008637713.1;Parent=gene875;Dbxref=Genbank:YP_008637713.1,GeneID:17149505;gbkey=CDS;product=putative 2-octaprenyl-3-methyl-6-methoxy-1%2C4-benzoquinol hydroxylase;protein_id=YP_008637713.1;transl_table=11 putative 2-octaprenyl-3-methyl-6-methoxy-1%2C4-benzoquinol hydroxylase (1017421-1018602 +)	silent gca -> gcG;	1138 1420 1646 1680 1811 220 301 3035 XCP123
NC_022541.1	1017927	c	c	c	T	c	c	T	c	c	T	c	T	c	T	c	T	c	T	T	c	c	c	c	c	c	c	T	cds818;Name=YP_008637713.1;Parent=gene875;Dbxref=Genbank:YP_008637713.1,GeneID:17149505;gbkey=CDS;product=putative 2-octaprenyl-3-methyl-6-methoxy-1%2C4-benzoquinol hydroxylase;protein_id=YP_008637713.1;transl_table=11 putative 2-octaprenyl-3-methyl-6-methoxy-1%2C4-benzoquinol hydroxylase (1017421-1018602 +)	silent tcc -> tcT;	1138 1420 1646 1680 1811 220 301 3035 XCP123
NC_022541.1	1017931	c	c	c	T	c	c	T	c	c	T	c	T	c	T	c	T	c	T	T	c	c	c	c	c	c	c	T	cds818;Name=YP_008637713.1;Parent=gene875;Dbxref=Genbank:YP_008637713.1,GeneID:17149505;gbkey=CDS;product=putative 2-octaprenyl-3-methyl-6-methoxy-1%2C4-benzoquinol hydroxylase;protein_id=YP_008637713.1;transl_table=11 putative 2-octaprenyl-3-methyl-6-methoxy-1%2C4-benzoquinol hydroxylase (1017421-1018602 +)	silent ctg -> Ttg;	1138 1420 1646 1680 1811 220 301 3035 XCP123
NC_022541.1	1017936	t	t	t	t	t	t	t	t	t	t	t	t	C	t	C	t	t	t	t	t	t	C	C	t	t	t	t	cds818;Name=YP_008637713.1;Parent=gene875;Dbxref=Genbank:YP_008637713.1,GeneID:17149505;gbkey=CDS;product=putative 2-octaprenyl-3-methyl-6-methoxy-1%2C4-benzoquinol hydroxylase;protein_id=YP_008637713.1;transl_table=11 putative 2-octaprenyl-3-methyl-6-methoxy-1%2C4-benzoquinol hydroxylase (1017421-1018602 +)	silent cgt -> cgC;	1713 2064 556 557
NC_022541.1	1017990	t	t	t	t	t	t	t	t	t	t	t	t	C	t	C	t	t	t	t	t	t	C	C	t	t	t	t	cds818;Name=YP_008637713.1;Parent=gene875;Dbxref=Genbank:YP_008637713.1,GeneID:17149505;gbkey=CDS;product=putative 2-octaprenyl-3-methyl-6-methoxy-1%2C4-benzoquinol hydroxylase;protein_id=YP_008637713.1;transl_table=11 putative 2-octaprenyl-3-methyl-6-methoxy-1%2C4-benzoquinol hydroxylase (1017421-1018602 +)	silent gtt -> gtC;	1713 2064 556 557
NC_022541.1	1018008	a	a	a	G	a	a	G	a	a	G	a	G	a	G	a	G	a	G	G	a	a	a	a	a	a	a	G	cds818;Name=YP_008637713.1;Parent=gene875;Dbxref=Genbank:YP_008637713.1,GeneID:17149505;gbkey=CDS;product=putative 2-octaprenyl-3-methyl-6-methoxy-1%2C4-benzoquinol hydroxylase;protein_id=YP_008637713.1;transl_table=11 putative 2-octaprenyl-3-methyl-6-methoxy-1%2C4-benzoquinol hydroxylase (1017421-1018602 +)	silent gaa -> gaG;	1138 1420 1646 1680 1811 220 301 3035 XCP123
NC_022541.1	1018047	g	g	g	C	g	g	C	g	g	C	g	C	g	C	g	C	g	C	C	g	g	g	g	g	g	g	C	cds818;Name=YP_008637713.1;Parent=gene875;Dbxref=Genbank:YP_008637713.1,GeneID:17149505;gbkey=CDS;product=putative 2-octaprenyl-3-methyl-6-methoxy-1%2C4-benzoquinol hydroxylase;protein_id=YP_008637713.1;transl_table=11 putative 2-octaprenyl-3-methyl-6-methoxy-1%2C4-benzoquinol hydroxylase (1017421-1018602 +)	silent acg -> acC;	1138 1420 1646 1680 1811 220 301 3035 XCP123
NC_022541.1	101808	g	g	g	g	g	g	g	g	g	g	g	g	*	g	*	g	g	g	g	g	g	*	*	g	g	g	g			1713 2064 556 557
NC_022541.1	1018095	t	t	t	C	t	t	C	t	t	C	t	C	C	C	C	C	t	C	C	t	t	C	C	t	t	t	C	cds818;Name=YP_008637713.1;Parent=gene875;Dbxref=Genbank:YP_008637713.1,GeneID:17149505;gbkey=CDS;product=putative 2-octaprenyl-3-methyl-6-methoxy-1%2C4-benzoquinol hydroxylase;protein_id=YP_008637713.1;transl_table=11 putative 2-octaprenyl-3-methyl-6-methoxy-1%2C4-benzoquinol hydroxylase (1017421-1018602 +)	silent att -> atC;	1138 1420 1646 1680 1713 1811 2064 220 301 3035 556 557 XCP123
NC_022541.1	1018110	g	g	g	C	g	g	C	g	g	C	g	C	g	C	g	C	g	C	C	g	g	g	g	g	g	g	C	cds818;Name=YP_008637713.1;Parent=gene875;Dbxref=Genbank:YP_008637713.1,GeneID:17149505;gbkey=CDS;product=putative 2-octaprenyl-3-methyl-6-methoxy-1%2C4-benzoquinol hydroxylase;protein_id=YP_008637713.1;transl_table=11 putative 2-octaprenyl-3-methyl-6-methoxy-1%2C4-benzoquinol hydroxylase (1017421-1018602 +)	silent ccg -> ccC;	1138 1420 1646 1680 1811 220 301 3035 XCP123
NC_022541.1	1018150	g	g	g	A	g	g	A	g	g	A	g	A	g	A	g	A	g	A	A	g	g	g	g	g	g	g	A	cds818;Name=YP_008637713.1;Parent=gene875;Dbxref=Genbank:YP_008637713.1,GeneID:17149505;gbkey=CDS;product=putative 2-octaprenyl-3-methyl-6-methoxy-1%2C4-benzoquinol hydroxylase;protein_id=YP_008637713.1;transl_table=11 putative 2-octaprenyl-3-methyl-6-methoxy-1%2C4-benzoquinol hydroxylase (1017421-1018602 +)	non-silent gat -> Aat;	1138 1420 1646 1680 1811 220 301 3035 XCP123
NC_022541.1	1018151	a	a	a	G	a	a	G	a	a	G	a	G	a	G	a	G	a	G	G	a	a	a	a	a	a	a	G	cds818;Name=YP_008637713.1;Parent=gene875;Dbxref=Genbank:YP_008637713.1,GeneID:17149505;gbkey=CDS;product=putative 2-octaprenyl-3-methyl-6-methoxy-1%2C4-benzoquinol hydroxylase;protein_id=YP_008637713.1;transl_table=11 putative 2-octaprenyl-3-methyl-6-methoxy-1%2C4-benzoquinol hydroxylase (1017421-1018602 +)	non-silent gat -> gGt;	1138 1420 1646 1680 1811 220 301 3035 XCP123
NC_022541.1	1018179	c	c	c	T	c	c	T	c	c	T	c	T	c	T	c	T	c	T	T	c	c	c	c	c	c	c	T	cds818;Name=YP_008637713.1;Parent=gene875;Dbxref=Genbank:YP_008637713.1,GeneID:17149505;gbkey=CDS;product=putative 2-octaprenyl-3-methyl-6-methoxy-1%2C4-benzoquinol hydroxylase;protein_id=YP_008637713.1;transl_table=11 putative 2-octaprenyl-3-methyl-6-methoxy-1%2C4-benzoquinol hydroxylase (1017421-1018602 +)	silent ttc -> ttT;	1138 1420 1646 1680 1811 220 301 3035 XCP123
NC_022541.1	1018182	g	g	g	T	g	g	T	g	g	T	g	T	g	T	g	T	g	T	T	g	g	g	g	g	g	g	T	cds818;Name=YP_008637713.1;Parent=gene875;Dbxref=Genbank:YP_008637713.1,GeneID:17149505;gbkey=CDS;product=putative 2-octaprenyl-3-methyl-6-methoxy-1%2C4-benzoquinol hydroxylase;protein_id=YP_008637713.1;transl_table=11 putative 2-octaprenyl-3-methyl-6-methoxy-1%2C4-benzoquinol hydroxylase (1017421-1018602 +)	silent gcg -> gcT;	1138 1420 1646 1680 1811 220 301 3035 XCP123
NC_022541.1	101821	a	a	a	C	a	a	C	a	a	C	a	C	a	C	a	C	a	C	C	a	a	a	a	a	a	a	C			1138 1420 1646 1680 1811 220 301 3035 XCP123
NC_022541.1	1018242	g	g	g	g	g	g	g	g	g	g	g	g	A	g	A	g	g	g	g	g	g	A	A	g	g	g	g	cds818;Name=YP_008637713.1;Parent=gene875;Dbxref=Genbank:YP_008637713.1,GeneID:17149505;gbkey=CDS;product=putative 2-octaprenyl-3-methyl-6-methoxy-1%2C4-benzoquinol hydroxylase;protein_id=YP_008637713.1;transl_table=11 putative 2-octaprenyl-3-methyl-6-methoxy-1%2C4-benzoquinol hydroxylase (1017421-1018602 +)	silent cag -> caA;	1713 2064 556 557
NC_022541.1	1018270	a	a	a	G	a	a	G	a	a	G	a	G	G	G	G	G	a	G	G	a	a	G	G	a	a	a	G	cds818;Name=YP_008637713.1;Parent=gene875;Dbxref=Genbank:YP_008637713.1,GeneID:17149505;gbkey=CDS;product=putative 2-octaprenyl-3-methyl-6-methoxy-1%2C4-benzoquinol hydroxylase;protein_id=YP_008637713.1;transl_table=11 putative 2-octaprenyl-3-methyl-6-methoxy-1%2C4-benzoquinol hydroxylase (1017421-1018602 +)	non-silent atg -> Gtg;	1138 1420 1646 1680 1713 1811 2064 220 301 3035 556 557 XCP123
NC_022541.1	1018275	g	g	g	C	g	g	C	g	g	C	g	C	g	C	g	C	g	C	C	g	g	g	g	g	g	g	C	cds818;Name=YP_008637713.1;Parent=gene875;Dbxref=Genbank:YP_008637713.1,GeneID:17149505;gbkey=CDS;product=putative 2-octaprenyl-3-methyl-6-methoxy-1%2C4-benzoquinol hydroxylase;protein_id=YP_008637713.1;transl_table=11 putative 2-octaprenyl-3-methyl-6-methoxy-1%2C4-benzoquinol hydroxylase (1017421-1018602 +)	silent ctg -> ctC;	1138 1420 1646 1680 1811 220 301 3035 XCP123
NC_022541.1	1018279	c	c	c	T	c	c	T	c	c	T	c	T	c	T	c	T	c	T	T	c	c	c	c	c	c	c	T	cds818;Name=YP_008637713.1;Parent=gene875;Dbxref=Genbank:YP_008637713.1,GeneID:17149505;gbkey=CDS;product=putative 2-octaprenyl-3-methyl-6-methoxy-1%2C4-benzoquinol hydroxylase;protein_id=YP_008637713.1;transl_table=11 putative 2-octaprenyl-3-methyl-6-methoxy-1%2C4-benzoquinol hydroxylase (1017421-1018602 +)	silent ctg -> Ttg;	1138 1420 1646 1680 1811 220 301 3035 XCP123
NC_022541.1	101828	c	c	c	T	c	c	T	c	c	T	c	T	c	T	c	T	c	T	T	c	c	c	c	c	c	c	T	cds82;Name=YP_008636977.1;Parent=gene85;Dbxref=Genbank:YP_008636977.1,GeneID:17152344;gbkey=CDS;product=putative LacI family transcriptional regulator;protein_id=YP_008636977.1;transl_table=11 putative LacI family transcriptional regulator (101822-102880 -)	silent gag -> gaA;	1138 1420 1646 1680 1811 220 301 3035 XCP123
NC_022541.1	1018299	c	c	c	G	c	c	G	c	c	G	c	G	G	G	G	G	c	G	G	c	c	G	G	c	c	c	G	cds818;Name=YP_008637713.1;Parent=gene875;Dbxref=Genbank:YP_008637713.1,GeneID:17149505;gbkey=CDS;product=putative 2-octaprenyl-3-methyl-6-methoxy-1%2C4-benzoquinol hydroxylase;protein_id=YP_008637713.1;transl_table=11 putative 2-octaprenyl-3-methyl-6-methoxy-1%2C4-benzoquinol hydroxylase (1017421-1018602 +)	silent gtc -> gtG;	1138 1420 1646 1680 1713 1811 2064 220 301 3035 556 557 XCP123
NC_022541.1	1018389	t	t	t	C	t	t	C	t	t	C	t	C	t	C	t	C	t	C	C	t	t	t	t	t	t	t	C	cds818;Name=YP_008637713.1;Parent=gene875;Dbxref=Genbank:YP_008637713.1,GeneID:17149505;gbkey=CDS;product=putative 2-octaprenyl-3-methyl-6-methoxy-1%2C4-benzoquinol hydroxylase;protein_id=YP_008637713.1;transl_table=11 putative 2-octaprenyl-3-methyl-6-methoxy-1%2C4-benzoquinol hydroxylase (1017421-1018602 +)	silent cgt -> cgC;	1138 1420 1646 1680 1811 220 301 3035 XCP123
NC_022541.1	1018420	c	c	c	T	c	c	T	c	c	T	c	T	c	T	c	T	c	T	T	c	c	c	c	c	c	c	T	cds818;Name=YP_008637713.1;Parent=gene875;Dbxref=Genbank:YP_008637713.1,GeneID:17149505;gbkey=CDS;product=putative 2-octaprenyl-3-methyl-6-methoxy-1%2C4-benzoquinol hydroxylase;protein_id=YP_008637713.1;transl_table=11 putative 2-octaprenyl-3-methyl-6-methoxy-1%2C4-benzoquinol hydroxylase (1017421-1018602 +)	non-silent cgc -> Tgc;	1138 1420 1646 1680 1811 220 301 3035 XCP123
NC_022541.1	1018422	c	c	c	T	c	c	T	c	c	T	c	T	c	T	c	T	c	T	T	c	c	c	c	c	c	c	T	cds818;Name=YP_008637713.1;Parent=gene875;Dbxref=Genbank:YP_008637713.1,GeneID:17149505;gbkey=CDS;product=putative 2-octaprenyl-3-methyl-6-methoxy-1%2C4-benzoquinol hydroxylase;protein_id=YP_008637713.1;transl_table=11 putative 2-octaprenyl-3-methyl-6-methoxy-1%2C4-benzoquinol hydroxylase (1017421-1018602 +)	silent cgc -> cgT;	1138 1420 1646 1680 1811 220 301 3035 XCP123
NC_022541.1	1018458	c	c	c	T	c	c	T	c	c	T	c	T	c	T	c	T	c	T	T	c	c	c	c	c	c	c	T	cds818;Name=YP_008637713.1;Parent=gene875;Dbxref=Genbank:YP_008637713.1,GeneID:17149505;gbkey=CDS;product=putative 2-octaprenyl-3-methyl-6-methoxy-1%2C4-benzoquinol hydroxylase;protein_id=YP_008637713.1;transl_table=11 putative 2-octaprenyl-3-methyl-6-methoxy-1%2C4-benzoquinol hydroxylase (1017421-1018602 +)	silent gcc -> gcT;	1138 1420 1646 1680 1811 220 301 3035 XCP123
NC_022541.1	1018470	t	t	t	C	t	t	C	t	t	C	t	C	C	C	C	C	t	C	C	t	t	C	C	t	t	t	C	cds818;Name=YP_008637713.1;Parent=gene875;Dbxref=Genbank:YP_008637713.1,GeneID:17149505;gbkey=CDS;product=putative 2-octaprenyl-3-methyl-6-methoxy-1%2C4-benzoquinol hydroxylase;protein_id=YP_008637713.1;transl_table=11 putative 2-octaprenyl-3-methyl-6-methoxy-1%2C4-benzoquinol hydroxylase (1017421-1018602 +)	silent ttt -> ttC;	1138 1420 1646 1680 1713 1811 2064 220 301 3035 556 557 XCP123
NC_022541.1	1018482	c	c	c	c	c	c	c	c	c	c	c	c	T	c	T	c	c	c	c	c	c	T	T	c	c	c	c	cds818;Name=YP_008637713.1;Parent=gene875;Dbxref=Genbank:YP_008637713.1,GeneID:17149505;gbkey=CDS;product=putative 2-octaprenyl-3-methyl-6-methoxy-1%2C4-benzoquinol hydroxylase;protein_id=YP_008637713.1;transl_table=11 putative 2-octaprenyl-3-methyl-6-methoxy-1%2C4-benzoquinol hydroxylase (1017421-1018602 +)	silent aac -> aaT;	1713 2064 556 557
NC_022541.1	1018503	c	c	c	c	c	c	c	c	c	c	c	c	A	c	A	c	c	c	c	c	c	A	A	c	c	c	c	cds818;Name=YP_008637713.1;Parent=gene875;Dbxref=Genbank:YP_008637713.1,GeneID:17149505;gbkey=CDS;product=putative 2-octaprenyl-3-methyl-6-methoxy-1%2C4-benzoquinol hydroxylase;protein_id=YP_008637713.1;transl_table=11 putative 2-octaprenyl-3-methyl-6-methoxy-1%2C4-benzoquinol hydroxylase (1017421-1018602 +)	non-silent gac -> gaA;	1713 2064 556 557
NC_022541.1	1018515	g	g	g	C	g	g	C	g	g	C	g	C	g	C	g	C	g	C	C	g	g	g	g	g	g	g	C	cds818;Name=YP_008637713.1;Parent=gene875;Dbxref=Genbank:YP_008637713.1,GeneID:17149505;gbkey=CDS;product=putative 2-octaprenyl-3-methyl-6-methoxy-1%2C4-benzoquinol hydroxylase;protein_id=YP_008637713.1;transl_table=11 putative 2-octaprenyl-3-methyl-6-methoxy-1%2C4-benzoquinol hydroxylase (1017421-1018602 +)	silent acg -> acC;	1138 1420 1646 1680 1811 220 301 3035 XCP123
NC_022541.1	1018606	c	c	c	A	c	c	A	c	c	A	c	A	A	A	A	A	c	A	A	c	c	A	A	c	c	c	A			1138 1420 1646 1680 1713 1811 2064 220 301 3035 556 557 XCP123
NC_022541.1	1018608	t	t	t	G	t	t	G	t	t	G	t	G	t	G	t	G	t	G	G	t	t	t	t	t	t	t	G			1138 1420 1646 1680 1811 220 301 3035 XCP123
NC_022541.1	1018623	c	c	c	A	c	c	A	c	c	A	c	A	c	A	c	A	c	A	A	c	c	c	c	c	c	c	A			1138 1420 1646 1680 1811 220 301 3035 XCP123
NC_022541.1	1018624	a	a	a	C	a	a	C	a	a	C	a	C	a	C	a	C	a	C	C	a	a	a	a	a	a	a	C			1138 1420 1646 1680 1811 220 301 3035 XCP123
NC_022541.1	1018642	t	t	t	t	t	t	t	t	t	t	t	t	C	t	C	t	t	t	t	t	t	C	C	t	t	t	t			1713 2064 556 557
NC_022541.1	1018642	t	t	t	G	t	t	G	t	t	G	t	G	t	G	t	G	t	G	G	t	t	t	t	t	t	t	G			1138 1420 1646 1680 1811 220 301 3035 XCP123
NC_022541.1	101867	c	c	c	G	c	c	G	c	c	G	c	G	c	G	c	G	c	G	G	c	c	c	c	c	c	c	G	cds82;Name=YP_008636977.1;Parent=gene85;Dbxref=Genbank:YP_008636977.1,GeneID:17152344;gbkey=CDS;product=putative LacI family transcriptional regulator;protein_id=YP_008636977.1;transl_table=11 putative LacI family transcriptional regulator (101822-102880 -)	silent cgg -> cgC;	1138 1420 1646 1680 1811 220 301 3035 XCP123
NC_022541.1	1018689	t	t	t	t	t	t	t	t	t	t	t	t	G	t	G	t	t	t	t	t	t	G	G	t	t	t	t			1713 2064 556 557
NC_022541.1	1018753	c	c	c	G	c	c	G	c	c	G	c	G	G	G	G	G	c	G	G	c	c	G	G	c	c	c	G	cds819;Name=YP_008637714.1;Parent=gene876;Dbxref=Genbank:YP_008637714.1,GeneID:17149506;gbkey=CDS;product=putative hydrolase;protein_id=YP_008637714.1;transl_table=11 putative hydrolase (1018700-1019452 +)	silent tcc -> tcG;	1138 1420 1646 1680 1713 1811 2064 220 301 3035 556 557 XCP123
NC_022541.1	1018769	c	c	c	T	c	c	T	c	c	T	c	T	c	T	c	T	c	T	T	c	c	c	c	c	c	c	T	cds819;Name=YP_008637714.1;Parent=gene876;Dbxref=Genbank:YP_008637714.1,GeneID:17149506;gbkey=CDS;product=putative hydrolase;protein_id=YP_008637714.1;transl_table=11 putative hydrolase (1018700-1019452 +)	silent ctg -> Ttg;	1138 1420 1646 1680 1811 220 301 3035 XCP123
NC_022541.1	1018772	c	c	c	T	c	c	T	c	c	T	c	T	c	T	c	T	c	T	T	c	c	c	c	c	c	c	T	cds819;Name=YP_008637714.1;Parent=gene876;Dbxref=Genbank:YP_008637714.1,GeneID:17149506;gbkey=CDS;product=putative hydrolase;protein_id=YP_008637714.1;transl_table=11 putative hydrolase (1018700-1019452 +)	silent ctg -> Ttg;	1138 1420 1646 1680 1811 220 301 3035 XCP123
NC_022541.1	1018795	c	c	c	T	c	c	T	c	c	T	c	T	c	T	c	T	c	T	T	c	c	c	c	c	c	c	T	cds819;Name=YP_008637714.1;Parent=gene876;Dbxref=Genbank:YP_008637714.1,GeneID:17149506;gbkey=CDS;product=putative hydrolase;protein_id=YP_008637714.1;transl_table=11 putative hydrolase (1018700-1019452 +)	silent gac -> gaT;	1138 1420 1646 1680 1811 220 301 3035 XCP123
NC_022541.1	1018820	g	g	g	A	g	g	A	g	g	A	g	A	g	A	g	A	g	A	A	g	g	g	g	g	g	g	A	cds819;Name=YP_008637714.1;Parent=gene876;Dbxref=Genbank:YP_008637714.1,GeneID:17149506;gbkey=CDS;product=putative hydrolase;protein_id=YP_008637714.1;transl_table=11 putative hydrolase (1018700-1019452 +)	non-silent gtc -> Atc;	1138 1420 1646 1680 1811 220 301 3035 XCP123
NC_022541.1	1018843	t	t	t	t	t	t	t	t	t	t	t	t	C	t	C	t	t	t	t	t	t	C	C	t	t	t	t	cds819;Name=YP_008637714.1;Parent=gene876;Dbxref=Genbank:YP_008637714.1,GeneID:17149506;gbkey=CDS;product=putative hydrolase;protein_id=YP_008637714.1;transl_table=11 putative hydrolase (1018700-1019452 +)	silent gat -> gaC;	1713 2064 556 557
NC_022541.1	1018844	g	g	g	A	g	g	A	g	g	A	g	A	g	A	g	A	g	A	A	g	g	g	g	g	g	g	A	cds819;Name=YP_008637714.1;Parent=gene876;Dbxref=Genbank:YP_008637714.1,GeneID:17149506;gbkey=CDS;product=putative hydrolase;protein_id=YP_008637714.1;transl_table=11 putative hydrolase (1018700-1019452 +)	non-silent gtg -> Atg;	1138 1420 1646 1680 1811 220 301 3035 XCP123
NC_022541.1	1018879	c	c	c	T	c	c	T	c	c	T	c	T	c	T	c	T	c	T	T	c	c	c	c	c	c	c	T	cds819;Name=YP_008637714.1;Parent=gene876;Dbxref=Genbank:YP_008637714.1,GeneID:17149506;gbkey=CDS;product=putative hydrolase;protein_id=YP_008637714.1;transl_table=11 putative hydrolase (1018700-1019452 +)	silent atc -> atT;	1138 1420 1646 1680 1811 220 301 3035 XCP123
NC_022541.1	1018880	a	a	a	G	a	a	G	a	a	G	a	G	a	G	a	G	a	G	G	a	a	a	a	a	a	a	G	cds819;Name=YP_008637714.1;Parent=gene876;Dbxref=Genbank:YP_008637714.1,GeneID:17149506;gbkey=CDS;product=putative hydrolase;protein_id=YP_008637714.1;transl_table=11 putative hydrolase (1018700-1019452 +)	non-silent acg -> Gcg;	1138 1420 1646 1680 1811 220 301 3035 XCP123
NC_022541.1	1018892	a	a	a	G	a	a	G	a	a	G	a	G	G	G	G	G	a	G	G	a	a	G	G	a	a	a	G	cds819;Name=YP_008637714.1;Parent=gene876;Dbxref=Genbank:YP_008637714.1,GeneID:17149506;gbkey=CDS;product=putative hydrolase;protein_id=YP_008637714.1;transl_table=11 putative hydrolase (1018700-1019452 +)	non-silent acg -> Gcg;	1138 1420 1646 1680 1713 1811 2064 220 301 3035 556 557 XCP123
NC_022541.1	1018900	a	a	a	C	a	a	C	a	a	C	a	C	a	C	a	C	a	C	C	a	a	a	a	a	a	a	C	cds819;Name=YP_008637714.1;Parent=gene876;Dbxref=Genbank:YP_008637714.1,GeneID:17149506;gbkey=CDS;product=putative hydrolase;protein_id=YP_008637714.1;transl_table=11 putative hydrolase (1018700-1019452 +)	silent gta -> gtC;	1138 1420 1646 1680 1811 220 301 3035 XCP123
NC_022541.1	1018909	c	c	c	T	c	c	T	c	c	T	c	T	c	T	c	T	c	T	T	c	c	c	c	c	c	c	T	cds819;Name=YP_008637714.1;Parent=gene876;Dbxref=Genbank:YP_008637714.1,GeneID:17149506;gbkey=CDS;product=putative hydrolase;protein_id=YP_008637714.1;transl_table=11 putative hydrolase (1018700-1019452 +)	silent gtc -> gtT;	1138 1420 1646 1680 1811 220 301 3035 XCP123
NC_022541.1	1018921	c	c	c	G	c	c	G	c	c	G	c	G	c	G	c	G	c	G	G	c	c	c	c	c	c	c	G	cds819;Name=YP_008637714.1;Parent=gene876;Dbxref=Genbank:YP_008637714.1,GeneID:17149506;gbkey=CDS;product=putative hydrolase;protein_id=YP_008637714.1;transl_table=11 putative hydrolase (1018700-1019452 +)	non-silent cac -> caG;	1138 1420 1646 1680 1811 220 301 3035 XCP123
NC_022541.1	1019017	a	a	a	G	a	a	G	a	a	G	a	G	a	G	a	G	a	G	G	a	a	a	a	a	a	a	G	cds819;Name=YP_008637714.1;Parent=gene876;Dbxref=Genbank:YP_008637714.1,GeneID:17149506;gbkey=CDS;product=putative hydrolase;protein_id=YP_008637714.1;transl_table=11 putative hydrolase (1018700-1019452 +)	silent aca -> acG;	1138 1420 1646 1680 1811 220 301 3035 XCP123
NC_022541.1	1019089	g	g	g	A	g	g	A	g	g	A	g	A	g	A	g	A	g	A	A	g	g	g	g	g	g	g	A	cds819;Name=YP_008637714.1;Parent=gene876;Dbxref=Genbank:YP_008637714.1,GeneID:17149506;gbkey=CDS;product=putative hydrolase;protein_id=YP_008637714.1;transl_table=11 putative hydrolase (1018700-1019452 +)	silent ggg -> ggA;	1138 1420 1646 1680 1811 220 301 3035 XCP123
NC_022541.1	1019166	a	a	a	G	a	a	G	a	a	G	a	G	G	G	G	G	a	G	G	a	a	G	G	a	a	a	G	cds819;Name=YP_008637714.1;Parent=gene876;Dbxref=Genbank:YP_008637714.1,GeneID:17149506;gbkey=CDS;product=putative hydrolase;protein_id=YP_008637714.1;transl_table=11 putative hydrolase (1018700-1019452 +)	non-silent gac -> gGc;	1138 1420 1646 1680 1713 1811 2064 220 301 3035 556 557 XCP123
NC_022541.1	1019191	c	c	c	A	c	c	A	c	c	A	c	A	c	A	c	A	c	A	A	c	c	c	c	c	c	c	A	cds819;Name=YP_008637714.1;Parent=gene876;Dbxref=Genbank:YP_008637714.1,GeneID:17149506;gbkey=CDS;product=putative hydrolase;protein_id=YP_008637714.1;transl_table=11 putative hydrolase (1018700-1019452 +)	non-silent cac -> caA;	1138 1420 1646 1680 1811 220 301 3035 XCP123
NC_022541.1	1019194	t	t	t	C	t	t	C	t	t	C	t	C	t	C	t	C	t	C	C	t	t	t	t	t	t	t	C	cds819;Name=YP_008637714.1;Parent=gene876;Dbxref=Genbank:YP_008637714.1,GeneID:17149506;gbkey=CDS;product=putative hydrolase;protein_id=YP_008637714.1;transl_table=11 putative hydrolase (1018700-1019452 +)	silent agt -> agC;	1138 1420 1646 1680 1811 220 301 3035 XCP123
NC_022541.1	1019200	g	g	g	A	g	g	A	g	g	A	g	A	g	A	g	A	g	A	A	g	g	g	g	g	g	g	A	cds819;Name=YP_008637714.1;Parent=gene876;Dbxref=Genbank:YP_008637714.1,GeneID:17149506;gbkey=CDS;product=putative hydrolase;protein_id=YP_008637714.1;transl_table=11 putative hydrolase (1018700-1019452 +)	silent cag -> caA;	1138 1420 1646 1680 1811 220 301 3035 XCP123
NC_022541.1	1019203	c	c	c	T	c	c	T	c	c	T	c	T	T	T	T	T	c	T	T	c	c	T	T	c	c	c	T	cds819;Name=YP_008637714.1;Parent=gene876;Dbxref=Genbank:YP_008637714.1,GeneID:17149506;gbkey=CDS;product=putative hydrolase;protein_id=YP_008637714.1;transl_table=11 putative hydrolase (1018700-1019452 +)	silent agc -> agT;	1138 1420 1646 1680 1713 1811 2064 220 301 3035 556 557 XCP123
NC_022541.1	1019209	t	t	t	C	t	t	C	t	t	C	t	C	t	C	t	C	t	C	C	t	t	t	t	t	t	t	C	cds819;Name=YP_008637714.1;Parent=gene876;Dbxref=Genbank:YP_008637714.1,GeneID:17149506;gbkey=CDS;product=putative hydrolase;protein_id=YP_008637714.1;transl_table=11 putative hydrolase (1018700-1019452 +)	silent gct -> gcC;	1138 1420 1646 1680 1811 220 301 3035 XCP123
NC_022541.1	1019217	c	c	c	T	c	c	T	c	c	T	c	T	c	T	c	T	c	T	T	c	c	c	c	c	c	c	T	cds819;Name=YP_008637714.1;Parent=gene876;Dbxref=Genbank:YP_008637714.1,GeneID:17149506;gbkey=CDS;product=putative hydrolase;protein_id=YP_008637714.1;transl_table=11 putative hydrolase (1018700-1019452 +)	non-silent acc -> aTc;	1138 1420 1646 1680 1811 220 301 3035 XCP123
NC_022541.1	1019219	c	c	c	A	c	c	A	c	c	A	c	A	A	A	A	A	c	A	A	c	c	A	A	c	c	c	A	cds819;Name=YP_008637714.1;Parent=gene876;Dbxref=Genbank:YP_008637714.1,GeneID:17149506;gbkey=CDS;product=putative hydrolase;protein_id=YP_008637714.1;transl_table=11 putative hydrolase (1018700-1019452 +)	non-silent cac -> Aac;	1138 1420 1646 1680 1713 1811 2064 220 301 3035 556 557 XCP123
NC_022541.1	1019225	t	t	t	C	t	t	C	t	t	C	t	C	t	C	t	C	t	C	C	t	t	t	t	t	t	t	C	cds819;Name=YP_008637714.1;Parent=gene876;Dbxref=Genbank:YP_008637714.1,GeneID:17149506;gbkey=CDS;product=putative hydrolase;protein_id=YP_008637714.1;transl_table=11 putative hydrolase (1018700-1019452 +)	silent ttg -> Ctg;	1138 1420 1646 1680 1811 220 301 3035 XCP123
NC_022541.1	1019247	g	g	g	C	g	g	C	g	g	C	g	C	g	C	g	C	g	C	C	g	g	g	g	g	g	g	C	cds819;Name=YP_008637714.1;Parent=gene876;Dbxref=Genbank:YP_008637714.1,GeneID:17149506;gbkey=CDS;product=putative hydrolase;protein_id=YP_008637714.1;transl_table=11 putative hydrolase (1018700-1019452 +)	non-silent ggg -> gCg;	1138 1420 1646 1680 1811 220 301 3035 XCP123
NC_022541.1	1019248	g	g	g	A	g	g	A	g	g	A	g	A	g	A	g	A	g	A	A	g	g	g	g	g	g	g	A	cds819;Name=YP_008637714.1;Parent=gene876;Dbxref=Genbank:YP_008637714.1,GeneID:17149506;gbkey=CDS;product=putative hydrolase;protein_id=YP_008637714.1;transl_table=11 putative hydrolase (1018700-1019452 +)	silent ggg -> ggA;	1138 1420 1646 1680 1811 220 301 3035 XCP123
NC_022541.1	1019269	g	g	g	A	g	g	A	g	g	A	g	A	g	A	g	A	g	A	A	g	g	g	g	g	g	g	A	cds819;Name=YP_008637714.1;Parent=gene876;Dbxref=Genbank:YP_008637714.1,GeneID:17149506;gbkey=CDS;product=putative hydrolase;protein_id=YP_008637714.1;transl_table=11 putative hydrolase (1018700-1019452 +)	silent acg -> acA;	1138 1420 1646 1680 1811 220 301 3035 XCP123
NC_022541.1	1019272	t	t	t	C	t	t	C	t	t	C	t	C	t	C	t	C	t	C	C	t	t	t	t	t	t	t	C	cds819;Name=YP_008637714.1;Parent=gene876;Dbxref=Genbank:YP_008637714.1,GeneID:17149506;gbkey=CDS;product=putative hydrolase;protein_id=YP_008637714.1;transl_table=11 putative hydrolase (1018700-1019452 +)	silent tgt -> tgC;	1138 1420 1646 1680 1811 220 301 3035 XCP123
NC_022541.1	1019275	t	t	t	G	t	t	G	t	t	G	t	G	t	G	t	G	t	G	G	t	t	t	t	t	t	t	G	cds819;Name=YP_008637714.1;Parent=gene876;Dbxref=Genbank:YP_008637714.1,GeneID:17149506;gbkey=CDS;product=putative hydrolase;protein_id=YP_008637714.1;transl_table=11 putative hydrolase (1018700-1019452 +)	silent cct -> ccG;	1138 1420 1646 1680 1811 220 301 3035 XCP123
NC_022541.1	1019278	g	g	g	A	g	g	A	g	g	A	g	A	g	A	g	A	g	A	A	g	g	g	g	g	g	g	A	cds819;Name=YP_008637714.1;Parent=gene876;Dbxref=Genbank:YP_008637714.1,GeneID:17149506;gbkey=CDS;product=putative hydrolase;protein_id=YP_008637714.1;transl_table=11 putative hydrolase (1018700-1019452 +)	silent acg -> acA;	1138 1420 1646 1680 1811 220 301 3035 XCP123
NC_022541.1	1019282	t	t	t	C	t	t	C	t	t	C	t	C	t	C	t	C	t	C	C	t	t	t	t	t	t	t	C	cds819;Name=YP_008637714.1;Parent=gene876;Dbxref=Genbank:YP_008637714.1,GeneID:17149506;gbkey=CDS;product=putative hydrolase;protein_id=YP_008637714.1;transl_table=11 putative hydrolase (1018700-1019452 +)	silent ttg -> Ctg;	1138 1420 1646 1680 1811 220 301 3035 XCP123
NC_022541.1	1019287	a	a	a	C	a	a	C	a	a	C	a	C	a	C	a	C	a	C	C	a	a	a	a	a	a	a	C	cds819;Name=YP_008637714.1;Parent=gene876;Dbxref=Genbank:YP_008637714.1,GeneID:17149506;gbkey=CDS;product=putative hydrolase;protein_id=YP_008637714.1;transl_table=11 putative hydrolase (1018700-1019452 +)	silent gga -> ggC;	1138 1420 1646 1680 1811 220 301 3035 XCP123
NC_022541.1	1019296	a	a	a	G	a	a	G	a	a	G	a	G	a	G	a	G	a	G	G	a	a	a	a	a	a	a	G	cds819;Name=YP_008637714.1;Parent=gene876;Dbxref=Genbank:YP_008637714.1,GeneID:17149506;gbkey=CDS;product=putative hydrolase;protein_id=YP_008637714.1;transl_table=11 putative hydrolase (1018700-1019452 +)	silent cga -> cgG;	1138 1420 1646 1680 1811 220 301 3035 XCP123
NC_022541.1	101930	g	g	g	A	g	g	A	g	g	A	g	A	g	A	g	A	g	A	A	g	g	g	g	g	g	g	A	cds82;Name=YP_008636977.1;Parent=gene85;Dbxref=Genbank:YP_008636977.1,GeneID:17152344;gbkey=CDS;product=putative LacI family transcriptional regulator;protein_id=YP_008636977.1;transl_table=11 putative LacI family transcriptional regulator (101822-102880 -)	silent cgc -> cgT;	1138 1420 1646 1680 1811 220 301 3035 XCP123
NC_022541.1	1019326	t	t	t	C	t	t	C	t	t	C	t	C	t	C	t	C	t	C	C	t	t	t	t	t	t	t	C	cds819;Name=YP_008637714.1;Parent=gene876;Dbxref=Genbank:YP_008637714.1,GeneID:17149506;gbkey=CDS;product=putative hydrolase;protein_id=YP_008637714.1;transl_table=11 putative hydrolase (1018700-1019452 +)	silent cat -> caC;	1138 1420 1646 1680 1811 220 301 3035 XCP123
NC_022541.1	101933	g	g	g	C	g	g	C	g	g	C	g	C	g	C	g	C	g	C	C	g	g	g	g	g	g	g	C	cds82;Name=YP_008636977.1;Parent=gene85;Dbxref=Genbank:YP_008636977.1,GeneID:17152344;gbkey=CDS;product=putative LacI family transcriptional regulator;protein_id=YP_008636977.1;transl_table=11 putative LacI family transcriptional regulator (101822-102880 -)	silent ggc -> ggG;	1138 1420 1646 1680 1811 220 301 3035 XCP123
NC_022541.1	1019338	a	a	a	G	a	a	G	a	a	G	a	G	a	G	a	G	a	G	G	a	a	a	a	a	a	a	G	cds819;Name=YP_008637714.1;Parent=gene876;Dbxref=Genbank:YP_008637714.1,GeneID:17149506;gbkey=CDS;product=putative hydrolase;protein_id=YP_008637714.1;transl_table=11 putative hydrolase (1018700-1019452 +)	silent gca -> gcG;	1138 1420 1646 1680 1811 220 301 3035 XCP123
NC_022541.1	1019360	c	c	c	T	c	c	T	c	c	T	c	T	c	T	c	T	c	T	T	c	c	c	c	c	c	c	T	cds819;Name=YP_008637714.1;Parent=gene876;Dbxref=Genbank:YP_008637714.1,GeneID:17149506;gbkey=CDS;product=putative hydrolase;protein_id=YP_008637714.1;transl_table=11 putative hydrolase (1018700-1019452 +)	silent ctg -> Ttg;	1138 1420 1646 1680 1811 220 301 3035 XCP123
NC_022541.1	1019374	g	g	g	A	g	g	A	g	g	A	g	A	g	A	g	A	g	A	A	g	g	g	g	g	g	g	A	cds819;Name=YP_008637714.1;Parent=gene876;Dbxref=Genbank:YP_008637714.1,GeneID:17149506;gbkey=CDS;product=putative hydrolase;protein_id=YP_008637714.1;transl_table=11 putative hydrolase (1018700-1019452 +)	silent gag -> gaA;	1138 1420 1646 1680 1811 220 301 3035 XCP123
NC_022541.1	1019383	a	a	a	G	a	a	G	a	a	G	a	G	G	G	G	G	a	G	G	a	a	G	G	a	a	a	G	cds819;Name=YP_008637714.1;Parent=gene876;Dbxref=Genbank:YP_008637714.1,GeneID:17149506;gbkey=CDS;product=putative hydrolase;protein_id=YP_008637714.1;transl_table=11 putative hydrolase (1018700-1019452 +)	silent gga -> ggG;	1138 1420 1646 1680 1713 1811 2064 220 301 3035 556 557 XCP123
NC_022541.1	1019398	c	c	c	G	c	c	G	c	c	G	c	G	c	G	c	G	c	G	G	c	c	c	c	c	c	c	G	cds819;Name=YP_008637714.1;Parent=gene876;Dbxref=Genbank:YP_008637714.1,GeneID:17149506;gbkey=CDS;product=putative hydrolase;protein_id=YP_008637714.1;transl_table=11 putative hydrolase (1018700-1019452 +)	silent gtc -> gtG;	1138 1420 1646 1680 1811 220 301 3035 XCP123
NC_022541.1	1019404	a	a	a	C	a	a	C	a	a	C	a	C	a	C	a	C	a	C	C	a	a	a	a	a	a	a	C	cds819;Name=YP_008637714.1;Parent=gene876;Dbxref=Genbank:YP_008637714.1,GeneID:17149506;gbkey=CDS;product=putative hydrolase;protein_id=YP_008637714.1;transl_table=11 putative hydrolase (1018700-1019452 +)	silent gca -> gcC;	1138 1420 1646 1680 1811 220 301 3035 XCP123
NC_022541.1	1019407	t	t	t	C	t	t	C	t	t	C	t	C	t	C	t	C	t	C	C	t	t	t	t	t	t	t	C	cds819;Name=YP_008637714.1;Parent=gene876;Dbxref=Genbank:YP_008637714.1,GeneID:17149506;gbkey=CDS;product=putative hydrolase;protein_id=YP_008637714.1;transl_table=11 putative hydrolase (1018700-1019452 +)	silent cct -> ccC;	1138 1420 1646 1680 1811 220 301 3035 XCP123
NC_022541.1	1019410	c	c	c	T	c	c	T	c	c	T	c	T	c	T	c	T	c	T	T	c	c	c	c	c	c	c	T	cds819;Name=YP_008637714.1;Parent=gene876;Dbxref=Genbank:YP_008637714.1,GeneID:17149506;gbkey=CDS;product=putative hydrolase;protein_id=YP_008637714.1;transl_table=11 putative hydrolase (1018700-1019452 +)	silent gcc -> gcT;	1138 1420 1646 1680 1811 220 301 3035 XCP123
NC_022541.1	101942	g	g	g	A	g	g	A	g	g	A	g	A	g	A	g	A	g	A	A	g	g	g	g	g	g	g	A	cds82;Name=YP_008636977.1;Parent=gene85;Dbxref=Genbank:YP_008636977.1,GeneID:17152344;gbkey=CDS;product=putative LacI family transcriptional regulator;protein_id=YP_008636977.1;transl_table=11 putative LacI family transcriptional regulator (101822-102880 -)	silent cgc -> cgT;	1138 1420 1646 1680 1811 220 301 3035 XCP123
NC_022541.1	1019460	t	t	t	C	t	t	C	t	t	C	t	C	t	C	t	C	t	C	C	t	t	t	t	t	t	t	C			1138 1420 1646 1680 1811 220 301 3035 XCP123
NC_022541.1	1019462	g	g	g	C	g	g	C	g	g	C	g	C	g	C	g	C	g	C	C	g	g	g	g	g	g	g	C			1138 1420 1646 1680 1811 220 301 3035 XCP123
NC_022541.1	1019471	g	g	g	C	g	g	C	g	g	C	g	C	C	C	C	C	g	C	C	g	g	C	C	g	g	g	C			1138 1420 1646 1680 1713 1811 2064 220 301 3035 556 557 XCP123
NC_022541.1	1019472	a	a	a	G	a	a	G	a	a	G	a	G	G	G	G	G	a	G	G	a	a	G	G	a	a	a	G			1138 1420 1646 1680 1713 1811 2064 220 301 3035 556 557 XCP123
NC_022541.1	1019477	g	g	g	A	g	g	A	g	g	A	g	A	A	A	A	A	g	A	A	g	g	A	A	g	g	g	A			1138 1420 1646 1680 1713 1811 2064 220 301 3035 556 557 XCP123
NC_022541.1	1019479	t	t	t	G	t	t	G	t	t	G	t	G	G	G	G	G	t	G	G	t	t	G	G	t	t	t	G			1138 1420 1646 1680 1713 1811 2064 220 301 3035 556 557 XCP123
NC_022541.1	1019481	c	c	c	G	c	c	G	c	c	G	c	G	c	G	c	G	c	G	G	c	c	c	c	c	c	c	G			1138 1420 1646 1680 1811 220 301 3035 XCP123
NC_022541.1	1019491	a	a	a	G	a	a	G	a	a	G	a	G	G	G	G	G	a	G	G	a	a	G	G	a	a	a	G			1138 1420 1646 1680 1713 1811 2064 220 301 3035 556 557 XCP123
NC_022541.1	1019492	t	t	t	C	t	t	C	t	t	C	t	C	C	C	C	C	t	C	C	t	t	C	C	t	t	t	C			1138 1420 1646 1680 1713 1811 2064 220 301 3035 556 557 XCP123
NC_022541.1	1019493	c	c	c	T	c	c	T	c	c	T	c	T	T	T	T	T	c	T	T	c	c	T	T	c	c	c	T			1138 1420 1646 1680 1713 1811 2064 220 301 3035 556 557 XCP123
NC_022541.1	10195	c	c	c	T	c	c	T	c	c	T	c	T	c	T	c	T	c	T	T	c	c	c	c	c	c	c	T	cds6;Name=YP_008636901.1;Parent=gene6;Dbxref=Genbank:YP_008636901.1,GeneID:17148936;gbkey=CDS;product=hypothetical protein;protein_id=YP_008636901.1;transl_table=11 hypothetical protein (9578-10771 +)	silent atc -> atT;	1138 1420 1646 1680 1811 220 301 3035 XCP123
NC_022541.1	1019505	c	c	c	c	c	c	c	c	c	c	c	c	T	c	T	c	c	c	c	c	c	T	T	c	c	c	c			1713 2064 556 557
NC_022541.1	1019506	a	a	a	a	a	a	a	a	a	a	a	a	C	a	C	a	a	a	a	a	a	C	C	a	a	a	a			1713 2064 556 557
NC_022541.1	1019507	g	g	g	A	g	g	A	g	g	A	g	A	g	A	g	A	g	A	A	g	g	g	g	g	g	g	A			1138 1420 1646 1680 1811 220 301 3035 XCP123
NC_022541.1	1019509	c	c	c	c	c	c	c	c	c	c	c	c	T	c	T	c	c	c	c	c	c	T	T	c	c	c	c			1713 2064 556 557
NC_022541.1	1019510	g	g	g	C	g	g	C	g	g	C	g	C	C	C	C	C	g	C	C	g	g	C	C	g	g	g	C			1138 1420 1646 1680 1713 1811 2064 220 301 3035 556 557 XCP123
NC_022541.1	1019512	c	c	c	c	c	c	c	c	c	c	c	c	T	c	T	c	c	c	c	c	c	T	T	c	c	c	c			1713 2064 556 557
NC_022541.1	1019525	t	t	t	G	t	t	G	t	t	G	t	G	t	G	t	G	t	G	G	t	t	t	t	t	t	t	G			1138 1420 1646 1680 1811 220 301 3035 XCP123
NC_022541.1	1019539	t	t	t	C	t	t	C	t	t	C	t	C	t	C	t	C	t	C	C	t	t	t	t	t	t	t	C			1138 1420 1646 1680 1811 220 301 3035 XCP123
NC_022541.1	1019548	g	g	g	A	g	g	A	g	g	A	g	A	g	A	g	A	g	A	A	g	g	g	g	g	g	g	A			1138 1420 1646 1680 1811 220 301 3035 XCP123
NC_022541.1	1019568	c	c	c	T	c	c	T	c	c	T	c	T	c	T	c	T	c	T	T	c	c	c	c	c	c	c	T	cds820;Name=YP_008637715.1;Parent=gene877;Dbxref=Genbank:YP_008637715.1,GeneID:17149507;gbkey=CDS;product=hypothetical protein;protein_id=YP_008637715.1;transl_table=11 hypothetical protein (1019555-1019986 +)	non-silent gcc -> gTc;	1138 1420 1646 1680 1811 220 301 3035 XCP123
NC_022541.1	1019569	c	c	c	T	c	c	T	c	c	T	c	T	c	T	c	T	c	T	T	c	c	c	c	c	c	c	T	cds820;Name=YP_008637715.1;Parent=gene877;Dbxref=Genbank:YP_008637715.1,GeneID:17149507;gbkey=CDS;product=hypothetical protein;protein_id=YP_008637715.1;transl_table=11 hypothetical protein (1019555-1019986 +)	silent gcc -> gcT;	1138 1420 1646 1680 1811 220 301 3035 XCP123
NC_022541.1	101957	c	c	c	T	c	c	T	c	c	T	c	T	c	T	c	T	c	T	T	c	c	c	c	c	c	c	T	cds82;Name=YP_008636977.1;Parent=gene85;Dbxref=Genbank:YP_008636977.1,GeneID:17152344;gbkey=CDS;product=putative LacI family transcriptional regulator;protein_id=YP_008636977.1;transl_table=11 putative LacI family transcriptional regulator (101822-102880 -)	silent gtg -> gtA;	1138 1420 1646 1680 1811 220 301 3035 XCP123
NC_022541.1	1019581	c	c	c	T	c	c	T	c	c	T	c	T	c	T	c	T	c	T	T	c	c	c	c	c	c	c	T	cds820;Name=YP_008637715.1;Parent=gene877;Dbxref=Genbank:YP_008637715.1,GeneID:17149507;gbkey=CDS;product=hypothetical protein;protein_id=YP_008637715.1;transl_table=11 hypothetical protein (1019555-1019986 +)	silent atc -> atT;	1138 1420 1646 1680 1811 220 301 3035 XCP123
NC_022541.1	1019608	c	c	c	T	c	c	T	c	c	T	c	T	c	T	c	T	c	T	T	c	c	c	c	c	c	c	T	cds820;Name=YP_008637715.1;Parent=gene877;Dbxref=Genbank:YP_008637715.1,GeneID:17149507;gbkey=CDS;product=hypothetical protein;protein_id=YP_008637715.1;transl_table=11 hypothetical protein (1019555-1019986 +)	silent ttc -> ttT;	1138 1420 1646 1680 1811 220 301 3035 XCP123
NC_022541.1	1019641	c	c	c	T	c	c	T	c	c	T	c	T	c	T	c	T	c	T	T	c	c	c	c	c	c	c	T	cds820;Name=YP_008637715.1;Parent=gene877;Dbxref=Genbank:YP_008637715.1,GeneID:17149507;gbkey=CDS;product=hypothetical protein;protein_id=YP_008637715.1;transl_table=11 hypothetical protein (1019555-1019986 +)	silent ggc -> ggT;	1138 1420 1646 1680 1811 220 301 3035 XCP123
NC_022541.1	1019665	c	c	c	T	c	c	T	c	c	T	c	T	T	T	T	T	c	T	T	c	c	T	T	c	c	c	T	cds820;Name=YP_008637715.1;Parent=gene877;Dbxref=Genbank:YP_008637715.1,GeneID:17149507;gbkey=CDS;product=hypothetical protein;protein_id=YP_008637715.1;transl_table=11 hypothetical protein (1019555-1019986 +)	silent gac -> gaT;	1138 1420 1646 1680 1713 1811 2064 220 301 3035 556 557 XCP123
NC_022541.1	1019668	t	t	t	C	t	t	C	t	t	C	t	C	t	C	t	C	t	C	C	t	t	t	t	t	t	t	C	cds820;Name=YP_008637715.1;Parent=gene877;Dbxref=Genbank:YP_008637715.1,GeneID:17149507;gbkey=CDS;product=hypothetical protein;protein_id=YP_008637715.1;transl_table=11 hypothetical protein (1019555-1019986 +)	silent ggt -> ggC;	1138 1420 1646 1680 1811 220 301 3035 XCP123
NC_022541.1	101968	g	g	g	A	g	g	A	g	g	A	g	A	g	A	g	A	g	A	A	g	g	g	g	g	g	g	A	cds82;Name=YP_008636977.1;Parent=gene85;Dbxref=Genbank:YP_008636977.1,GeneID:17152344;gbkey=CDS;product=putative LacI family transcriptional regulator;protein_id=YP_008636977.1;transl_table=11 putative LacI family transcriptional regulator (101822-102880 -)	silent ctg -> Ttg;	1138 1420 1646 1680 1811 220 301 3035 XCP123
NC_022541.1	1019706	g	g	g	g	g	g	g	g	g	g	g	g	A	g	A	g	g	g	g	g	g	A	A	g	g	g	g	cds820;Name=YP_008637715.1;Parent=gene877;Dbxref=Genbank:YP_008637715.1,GeneID:17149507;gbkey=CDS;product=hypothetical protein;protein_id=YP_008637715.1;transl_table=11 hypothetical protein (1019555-1019986 +)	non-silent cgt -> cAt;	1713 2064 556 557
NC_022541.1	1019707	t	t	t	G	t	t	G	t	t	G	t	G	t	G	t	G	t	G	G	t	t	t	t	t	t	t	G	cds820;Name=YP_008637715.1;Parent=gene877;Dbxref=Genbank:YP_008637715.1,GeneID:17149507;gbkey=CDS;product=hypothetical protein;protein_id=YP_008637715.1;transl_table=11 hypothetical protein (1019555-1019986 +)	silent cgt -> cgG;	1138 1420 1646 1680 1811 220 301 3035 XCP123
NC_022541.1	1019755	c	c	c	c	c	c	c	c	c	c	c	c	G	c	G	c	c	c	c	c	c	G	G	c	c	c	c	cds820;Name=YP_008637715.1;Parent=gene877;Dbxref=Genbank:YP_008637715.1,GeneID:17149507;gbkey=CDS;product=hypothetical protein;protein_id=YP_008637715.1;transl_table=11 hypothetical protein (1019555-1019986 +)	silent acc -> acG;	1713 2064 556 557
NC_022541.1	1019774	a	a	a	a	a	a	a	a	a	a	a	a	G	a	G	a	a	a	a	a	a	G	G	a	a	a	a	cds820;Name=YP_008637715.1;Parent=gene877;Dbxref=Genbank:YP_008637715.1,GeneID:17149507;gbkey=CDS;product=hypothetical protein;protein_id=YP_008637715.1;transl_table=11 hypothetical protein (1019555-1019986 +)	non-silent aat -> Gat;	1713 2064 556 557
NC_022541.1	1019794	a	a	a	G	a	a	G	a	a	G	a	G	G	G	G	G	a	G	G	a	a	G	G	a	a	a	G	cds820;Name=YP_008637715.1;Parent=gene877;Dbxref=Genbank:YP_008637715.1,GeneID:17149507;gbkey=CDS;product=hypothetical protein;protein_id=YP_008637715.1;transl_table=11 hypothetical protein (1019555-1019986 +)	silent caa -> caG;	1138 1420 1646 1680 1713 1811 2064 220 301 3035 556 557 XCP123
NC_022541.1	10198	t	t	t	C	t	t	C	t	t	C	t	C	t	C	t	C	t	C	C	t	t	t	t	t	t	t	C	cds6;Name=YP_008636901.1;Parent=gene6;Dbxref=Genbank:YP_008636901.1,GeneID:17148936;gbkey=CDS;product=hypothetical protein;protein_id=YP_008636901.1;transl_table=11 hypothetical protein (9578-10771 +)	silent gct -> gcC;	1138 1420 1646 1680 1811 220 301 3035 XCP123
NC_022541.1	101981	g	g	g	C	g	g	C	g	g	C	g	C	g	C	g	C	g	C	C	g	g	g	g	g	g	g	C	cds82;Name=YP_008636977.1;Parent=gene85;Dbxref=Genbank:YP_008636977.1,GeneID:17152344;gbkey=CDS;product=putative LacI family transcriptional regulator;protein_id=YP_008636977.1;transl_table=11 putative LacI family transcriptional regulator (101822-102880 -)	silent cgc -> cgG;	1138 1420 1646 1680 1811 220 301 3035 XCP123
NC_022541.1	1019812	c	c	c	T	c	c	T	c	c	T	c	T	c	T	c	T	c	T	T	c	c	c	c	c	c	c	T	cds820;Name=YP_008637715.1;Parent=gene877;Dbxref=Genbank:YP_008637715.1,GeneID:17149507;gbkey=CDS;product=hypothetical protein;protein_id=YP_008637715.1;transl_table=11 hypothetical protein (1019555-1019986 +)	silent cac -> caT;	1138 1420 1646 1680 1811 220 301 3035 XCP123
NC_022541.1	1019827	a	a	a	C	a	a	C	a	a	C	a	C	a	C	a	C	a	C	C	a	a	a	a	a	a	a	C	cds820;Name=YP_008637715.1;Parent=gene877;Dbxref=Genbank:YP_008637715.1,GeneID:17149507;gbkey=CDS;product=hypothetical protein;protein_id=YP_008637715.1;transl_table=11 hypothetical protein (1019555-1019986 +)	silent gta -> gtC;	1138 1420 1646 1680 1811 220 301 3035 XCP123
NC_022541.1	1019833	t	t	t	C	t	t	C	t	t	C	t	C	t	C	t	C	t	C	C	t	t	t	t	t	t	t	C	cds820;Name=YP_008637715.1;Parent=gene877;Dbxref=Genbank:YP_008637715.1,GeneID:17149507;gbkey=CDS;product=hypothetical protein;protein_id=YP_008637715.1;transl_table=11 hypothetical protein (1019555-1019986 +)	silent ctt -> ctC;	1138 1420 1646 1680 1811 220 301 3035 XCP123
NC_022541.1	1019844	g	g	g	A	g	g	A	g	g	A	g	A	g	A	g	A	g	A	A	g	g	g	g	g	g	g	A	cds820;Name=YP_008637715.1;Parent=gene877;Dbxref=Genbank:YP_008637715.1,GeneID:17149507;gbkey=CDS;product=hypothetical protein;protein_id=YP_008637715.1;transl_table=11 hypothetical protein (1019555-1019986 +)	non-silent ggt -> gAt;	1138 1420 1646 1680 1811 220 301 3035 XCP123
NC_022541.1	1019845	t	t	t	C	t	t	C	t	t	C	t	C	t	C	t	C	t	C	C	t	t	t	t	t	t	t	C	cds820;Name=YP_008637715.1;Parent=gene877;Dbxref=Genbank:YP_008637715.1,GeneID:17149507;gbkey=CDS;product=hypothetical protein;protein_id=YP_008637715.1;transl_table=11 hypothetical protein (1019555-1019986 +)	silent ggt -> ggC;	1138 1420 1646 1680 1811 220 301 3035 XCP123
NC_022541.1	1019847	a	a	a	C	a	a	C	a	a	C	a	C	a	C	a	C	a	C	C	a	a	a	a	a	a	a	C	cds820;Name=YP_008637715.1;Parent=gene877;Dbxref=Genbank:YP_008637715.1,GeneID:17149507;gbkey=CDS;product=hypothetical protein;protein_id=YP_008637715.1;transl_table=11 hypothetical protein (1019555-1019986 +)	non-silent gat -> gCt;	1138 1420 1646 1680 1811 220 301 3035 XCP123
NC_022541.1	1019852	g	g	g	T	g	g	T	g	g	T	g	T	g	T	g	T	g	T	T	g	g	g	g	g	g	g	T	cds820;Name=YP_008637715.1;Parent=gene877;Dbxref=Genbank:YP_008637715.1,GeneID:17149507;gbkey=CDS;product=hypothetical protein;protein_id=YP_008637715.1;transl_table=11 hypothetical protein (1019555-1019986 +)	non-silent gcc -> Tcc;	1138 1420 1646 1680 1811 220 301 3035 XCP123
NC_022541.1	1019879	t	t	t	G	t	t	G	t	t	G	t	G	t	G	t	G	t	G	G	t	t	t	t	t	t	t	G	cds820;Name=YP_008637715.1;Parent=gene877;Dbxref=Genbank:YP_008637715.1,GeneID:17149507;gbkey=CDS;product=hypothetical protein;protein_id=YP_008637715.1;transl_table=11 hypothetical protein (1019555-1019986 +)	non-silent tcg -> Gcg;	1138 1420 1646 1680 1811 220 301 3035 XCP123
NC_022541.1	1019884	c	c	c	G	c	c	G	c	c	G	c	G	G	G	G	G	c	G	G	c	c	G	G	c	c	c	G	cds820;Name=YP_008637715.1;Parent=gene877;Dbxref=Genbank:YP_008637715.1,GeneID:17149507;gbkey=CDS;product=hypothetical protein;protein_id=YP_008637715.1;transl_table=11 hypothetical protein (1019555-1019986 +)	silent ccc -> ccG;	1138 1420 1646 1680 1713 1811 2064 220 301 3035 556 557 XCP123
NC_022541.1	1019920	t	t	t	C	t	t	C	t	t	C	t	C	C	C	C	C	t	C	C	t	t	C	C	t	t	t	C	cds820;Name=YP_008637715.1;Parent=gene877;Dbxref=Genbank:YP_008637715.1,GeneID:17149507;gbkey=CDS;product=hypothetical protein;protein_id=YP_008637715.1;transl_table=11 hypothetical protein (1019555-1019986 +)	silent ctt -> ctC;	1138 1420 1646 1680 1713 1811 2064 220 301 3035 556 557 XCP123
NC_022541.1	1019929	g	g	g	A	g	g	A	g	g	A	g	A	g	A	g	A	g	A	A	g	g	g	g	g	g	g	A	cds820;Name=YP_008637715.1;Parent=gene877;Dbxref=Genbank:YP_008637715.1,GeneID:17149507;gbkey=CDS;product=hypothetical protein;protein_id=YP_008637715.1;transl_table=11 hypothetical protein (1019555-1019986 +)	silent ggg -> ggA;	1138 1420 1646 1680 1811 220 301 3035 XCP123
NC_022541.1	1019959	g	g	g	A	g	g	A	g	g	A	g	A	g	A	g	A	g	A	A	g	g	g	g	g	g	g	A	cds820;Name=YP_008637715.1;Parent=gene877;Dbxref=Genbank:YP_008637715.1,GeneID:17149507;gbkey=CDS;product=hypothetical protein;protein_id=YP_008637715.1;transl_table=11 hypothetical protein (1019555-1019986 +)	silent tcg -> tcA;	1138 1420 1646 1680 1811 220 301 3035 XCP123
NC_022541.1	101996	g	g	g	g	g	g	g	g	g	g	g	g	A	g	A	g	g	g	g	g	g	A	A	g	g	g	g	cds82;Name=YP_008636977.1;Parent=gene85;Dbxref=Genbank:YP_008636977.1,GeneID:17152344;gbkey=CDS;product=putative LacI family transcriptional regulator;protein_id=YP_008636977.1;transl_table=11 putative LacI family transcriptional regulator (101822-102880 -)	silent agc -> agT;	1713 2064 556 557
NC_022541.1	1019978	a	a	a	G	a	a	G	a	a	G	a	G	a	G	a	G	a	G	G	a	a	a	a	a	a	a	G	cds820;Name=YP_008637715.1;Parent=gene877;Dbxref=Genbank:YP_008637715.1,GeneID:17149507;gbkey=CDS;product=hypothetical protein;protein_id=YP_008637715.1;transl_table=11 hypothetical protein (1019555-1019986 +)	non-silent acc -> Gcc;	1138 1420 1646 1680 1811 220 301 3035 XCP123
NC_022541.1	1019990	a	a	a	G	a	a	G	a	a	G	a	G	a	G	a	G	a	G	G	a	a	a	a	a	a	a	G			1138 1420 1646 1680 1811 220 301 3035 XCP123
NC_022541.1	1020003	t	t	t	G	t	t	G	t	t	G	t	G	t	G	t	G	t	G	G	t	t	t	t	t	t	t	G			1138 1420 1646 1680 1811 220 301 3035 XCP123
NC_022541.1	1020010	a	a	a	a	a	a	a	a	a	a	a	a	G	a	G	a	a	a	a	a	a	G	G	a	a	a	a			1713 2064 556 557
NC_022541.1	1020013	a	a	a	T	a	a	T	a	a	T	a	T	a	T	a	T	a	T	T	a	a	a	a	a	a	a	T			1138 1420 1646 1680 1811 220 301 3035 XCP123
NC_022541.1	1020014	c	c	c	T	c	c	T	c	c	T	c	T	c	T	c	T	c	T	T	c	c	c	c	c	c	c	T			1138 1420 1646 1680 1811 220 301 3035 XCP123
NC_022541.1	1020016	t	t	t	t	t	t	t	t	t	t	t	t	C	t	C	t	t	t	t	t	t	C	C	t	t	t	t			1713 2064 556 557
NC_022541.1	1020016	t	t	t	G	t	t	G	t	t	G	t	G	t	G	t	G	t	G	G	t	t	t	t	t	t	t	G			1138 1420 1646 1680 1811 220 301 3035 XCP123
NC_022541.1	1020018	t	t	t	G	t	t	G	t	t	G	t	G	t	G	t	G	t	G	G	t	t	t	t	t	t	t	G			1138 1420 1646 1680 1811 220 301 3035 XCP123
NC_022541.1	1020021	t	t	t	t	t	t	t	t	t	t	t	t	C	t	C	t	t	t	t	t	t	C	C	t	t	t	t			1713 2064 556 557
NC_022541.1	1020022	c	c	c	c	c	c	c	c	c	c	c	c	c	c	c	c	c	c	c	c	c	T	c	c	c	c	c			556
NC_022541.1	1020024	t	t	t	C	t	t	C	t	t	C	t	C	t	C	t	C	t	C	C	t	t	t	t	t	t	t	C			1138 1420 1646 1680 1811 220 301 3035 XCP123
NC_022541.1	1020035	a	a	a	a	a	a	a	a	a	a	a	a	C	a	C	a	a	a	a	a	a	C	C	a	a	a	a			1713 2064 556 557
NC_022541.1	1020036	t	t	t	C	t	t	C	t	t	C	t	C	t	C	t	C	t	C	C	t	t	t	t	t	t	t	C			1138 1420 1646 1680 1811 220 301 3035 XCP123
NC_022541.1	1020043	t	t	t	t	t	t	t	t	t	t	t	t	C	t	C	t	t	t	t	t	t	C	C	t	t	t	t			1713 2064 556 557
NC_022541.1	1020049	a	a	a	G	a	a	G	a	a	G	a	G	G	G	G	G	a	G	G	a	a	G	G	a	a	a	G			1138 1420 1646 1680 1713 1811 2064 220 301 3035 556 557 XCP123
NC_022541.1	102005	g	g	g	A	g	g	A	g	g	A	g	A	g	A	g	A	g	A	A	g	g	g	g	g	g	g	A	cds82;Name=YP_008636977.1;Parent=gene85;Dbxref=Genbank:YP_008636977.1,GeneID:17152344;gbkey=CDS;product=putative LacI family transcriptional regulator;protein_id=YP_008636977.1;transl_table=11 putative LacI family transcriptional regulator (101822-102880 -)	silent tac -> taT;	1138 1420 1646 1680 1811 220 301 3035 XCP123
NC_022541.1	1020052	c	c	c	c	c	c	c	c	c	c	c	c	T	c	T	c	c	c	c	c	c	T	T	c	c	c	c			1713 2064 556 557
NC_022541.1	1020062	c	c	c	c	c	c	c	c	c	c	c	c	G	c	G	c	c	c	c	c	c	G	G	c	c	c	c			1713 2064 556 557
NC_022541.1	1020064	g	g	g	A	g	g	A	g	g	A	g	A	g	A	g	A	g	A	A	g	g	g	g	g	g	g	A			1138 1420 1646 1680 1811 220 301 3035 XCP123
NC_022541.1	1020071	t	t	t	C	t	t	C	t	t	C	t	C	t	C	t	C	t	C	C	t	t	t	t	t	t	t	C			1138 1420 1646 1680 1811 220 301 3035 XCP123
NC_022541.1	1020072	t	t	t	G	t	t	G	t	t	G	t	G	t	G	t	G	t	G	G	t	t	t	t	t	t	t	G			1138 1420 1646 1680 1811 220 301 3035 XCP123
NC_022541.1	1020079	t	t	t	*	t	t	*	t	t	*	t	*	*	*	*	*	t	*	*	t	t	*	*	t	t	t	*			1138 1420 1646 1680 1713 1811 2064 220 301 3035 556 557 XCP123
NC_022541.1	1020086	a	a	a	C	a	a	C	a	a	C	a	C	a	C	a	C	a	C	C	a	a	a	a	a	a	a	C			1138 1420 1646 1680 1811 220 301 3035 XCP123
NC_022541.1	1020087	g	g	g	C	g	g	C	g	g	C	g	C	C	C	C	C	g	C	C	g	g	C	C	g	g	g	C			1138 1420 1646 1680 1713 1811 2064 220 301 3035 556 557 XCP123
NC_022541.1	1020095	c	c	c	T	c	c	T	c	c	T	c	T	c	T	c	T	c	T	T	c	c	c	c	c	c	c	T			1138 1420 1646 1680 1811 220 301 3035 XCP123
NC_022541.1	10201	c	c	c	T	c	c	T	c	c	T	c	T	c	T	c	T	c	T	T	c	c	c	c	c	c	c	T	cds6;Name=YP_008636901.1;Parent=gene6;Dbxref=Genbank:YP_008636901.1,GeneID:17148936;gbkey=CDS;product=hypothetical protein;protein_id=YP_008636901.1;transl_table=11 hypothetical protein (9578-10771 +)	silent gcc -> gcT;	1138 1420 1646 1680 1811 220 301 3035 XCP123
NC_022541.1	1020107	a	a	a	a	a	a	a	a	a	a	a	a	C	a	C	a	a	a	a	a	a	C	C	a	a	a	a			1713 2064 556 557
NC_022541.1	1020180	c	c	c	c	c	c	c	c	c	c	c	c	T	c	T	c	c	c	c	c	c	T	T	c	c	c	c	cds821;Name=YP_008637716.1;Parent=gene878;Dbxref=Genbank:YP_008637716.1,GeneID:17149508;gbkey=CDS;product=Hypothetical protein;protein_id=YP_008637716.1;transl_table=11 Hypothetical protein (1020138-1021169 +)	non-silent ccg -> Tcg;	1713 2064 556 557
NC_022541.1	1020187	g	g	g	C	g	g	C	g	g	C	g	C	C	C	C	C	g	C	C	g	g	C	C	g	g	g	C	cds821;Name=YP_008637716.1;Parent=gene878;Dbxref=Genbank:YP_008637716.1,GeneID:17149508;gbkey=CDS;product=Hypothetical protein;protein_id=YP_008637716.1;transl_table=11 Hypothetical protein (1020138-1021169 +)	non-silent ggg -> gCg;	1138 1420 1646 1680 1713 1811 2064 220 301 3035 556 557 XCP123
NC_022541.1	1020203	c	c	c	A	c	c	A	c	c	A	c	A	A	A	A	A	c	A	A	c	c	A	A	c	c	c	A	cds821;Name=YP_008637716.1;Parent=gene878;Dbxref=Genbank:YP_008637716.1,GeneID:17149508;gbkey=CDS;product=Hypothetical protein;protein_id=YP_008637716.1;transl_table=11 Hypothetical protein (1020138-1021169 +)	non-silent cac -> caA;	1138 1420 1646 1680 1713 1811 2064 220 301 3035 556 557 XCP123
NC_022541.1	1020210	g	g	g	T	g	g	T	g	g	T	g	T	T	T	T	T	g	T	T	g	g	T	T	g	g	g	T	cds821;Name=YP_008637716.1;Parent=gene878;Dbxref=Genbank:YP_008637716.1,GeneID:17149508;gbkey=CDS;product=Hypothetical protein;protein_id=YP_008637716.1;transl_table=11 Hypothetical protein (1020138-1021169 +)	non-silent gtg -> Ttg;	1138 1420 1646 1680 1713 1811 2064 220 301 3035 556 557 XCP123
NC_022541.1	1020245	a	a	a	G	a	a	G	a	a	G	a	G	a	G	a	G	a	G	G	a	a	a	a	a	a	a	G	cds821;Name=YP_008637716.1;Parent=gene878;Dbxref=Genbank:YP_008637716.1,GeneID:17149508;gbkey=CDS;product=Hypothetical protein;protein_id=YP_008637716.1;transl_table=11 Hypothetical protein (1020138-1021169 +)	silent cca -> ccG;	1138 1420 1646 1680 1811 220 301 3035 XCP123
NC_022541.1	1020251	a	a	a	G	a	a	G	a	a	G	a	G	G	G	G	G	a	G	G	a	a	G	G	a	a	a	G	cds821;Name=YP_008637716.1;Parent=gene878;Dbxref=Genbank:YP_008637716.1,GeneID:17149508;gbkey=CDS;product=Hypothetical protein;protein_id=YP_008637716.1;transl_table=11 Hypothetical protein (1020138-1021169 +)	silent gca -> gcG;	1138 1420 1646 1680 1713 1811 2064 220 301 3035 556 557 XCP123
NC_022541.1	1020287	c	c	c	c	c	c	c	c	c	c	c	c	G	c	G	c	c	c	c	c	c	G	G	c	c	c	c	cds821;Name=YP_008637716.1;Parent=gene878;Dbxref=Genbank:YP_008637716.1,GeneID:17149508;gbkey=CDS;product=Hypothetical protein;protein_id=YP_008637716.1;transl_table=11 Hypothetical protein (1020138-1021169 +)	silent ccc -> ccG;	1713 2064 556 557
NC_022541.1	1020300	t	t	t	C	t	t	C	t	t	C	t	C	t	C	t	C	t	C	C	t	t	t	t	t	t	t	C	cds821;Name=YP_008637716.1;Parent=gene878;Dbxref=Genbank:YP_008637716.1,GeneID:17149508;gbkey=CDS;product=Hypothetical protein;protein_id=YP_008637716.1;transl_table=11 Hypothetical protein (1020138-1021169 +)	silent ttg -> Ctg;	1138 1420 1646 1680 1811 220 301 3035 XCP123
NC_022541.1	1020305	g	g	g	T	g	g	T	g	g	T	g	T	g	T	g	T	g	T	T	g	g	g	g	g	g	g	T	cds821;Name=YP_008637716.1;Parent=gene878;Dbxref=Genbank:YP_008637716.1,GeneID:17149508;gbkey=CDS;product=Hypothetical protein;protein_id=YP_008637716.1;transl_table=11 Hypothetical protein (1020138-1021169 +)	silent ggg -> ggT;	1138 1420 1646 1680 1811 220 301 3035 XCP123
NC_022541.1	1020317	c	c	c	c	c	c	c	c	c	c	c	c	T	c	T	c	c	c	c	c	c	T	T	c	c	c	c	cds821;Name=YP_008637716.1;Parent=gene878;Dbxref=Genbank:YP_008637716.1,GeneID:17149508;gbkey=CDS;product=Hypothetical protein;protein_id=YP_008637716.1;transl_table=11 Hypothetical protein (1020138-1021169 +)	silent ttc -> ttT;	1713 2064 556 557
NC_022541.1	1020318	t	t	t	t	t	t	t	t	t	t	t	t	C	t	C	t	t	t	t	t	t	C	C	t	t	t	t	cds821;Name=YP_008637716.1;Parent=gene878;Dbxref=Genbank:YP_008637716.1,GeneID:17149508;gbkey=CDS;product=Hypothetical protein;protein_id=YP_008637716.1;transl_table=11 Hypothetical protein (1020138-1021169 +)	silent tta -> Cta;	1713 2064 556 557
NC_022541.1	1020320	a	a	a	G	a	a	G	a	a	G	a	G	a	G	a	G	a	G	G	a	a	a	a	a	a	a	G	cds821;Name=YP_008637716.1;Parent=gene878;Dbxref=Genbank:YP_008637716.1,GeneID:17149508;gbkey=CDS;product=Hypothetical protein;protein_id=YP_008637716.1;transl_table=11 Hypothetical protein (1020138-1021169 +)	silent tta -> ttG;	1138 1420 1646 1680 1811 220 301 3035 XCP123
NC_022541.1	1020330	g	g	g	g	g	g	g	g	g	g	g	g	A	g	A	g	g	g	g	g	g	A	A	g	g	g	g	cds821;Name=YP_008637716.1;Parent=gene878;Dbxref=Genbank:YP_008637716.1,GeneID:17149508;gbkey=CDS;product=Hypothetical protein;protein_id=YP_008637716.1;transl_table=11 Hypothetical protein (1020138-1021169 +)	non-silent ggc -> Agc;	1713 2064 556 557
NC_022541.1	1020339	a	a	a	C	a	a	C	a	a	C	a	C	a	C	a	C	a	C	C	a	a	a	a	a	a	a	C	cds821;Name=YP_008637716.1;Parent=gene878;Dbxref=Genbank:YP_008637716.1,GeneID:17149508;gbkey=CDS;product=Hypothetical protein;protein_id=YP_008637716.1;transl_table=11 Hypothetical protein (1020138-1021169 +)	non-silent aag -> Cag;	1138 1420 1646 1680 1811 220 301 3035 XCP123
NC_022541.1	102035	g	g	g	A	g	g	A	g	g	A	g	A	g	A	g	A	g	A	A	g	g	g	g	g	g	g	A	cds82;Name=YP_008636977.1;Parent=gene85;Dbxref=Genbank:YP_008636977.1,GeneID:17152344;gbkey=CDS;product=putative LacI family transcriptional regulator;protein_id=YP_008636977.1;transl_table=11 putative LacI family transcriptional regulator (101822-102880 -)	silent aac -> aaT;	1138 1420 1646 1680 1811 220 301 3035 XCP123
NC_022541.1	1020371	g	g	g	C	g	g	C	g	g	C	g	C	g	C	g	C	g	C	C	g	g	g	g	g	g	g	C	cds821;Name=YP_008637716.1;Parent=gene878;Dbxref=Genbank:YP_008637716.1,GeneID:17149508;gbkey=CDS;product=Hypothetical protein;protein_id=YP_008637716.1;transl_table=11 Hypothetical protein (1020138-1021169 +)	silent cgg -> cgC;	1138 1420 1646 1680 1811 220 301 3035 XCP123
NC_022541.1	1020386	t	t	t	C	t	t	C	t	t	C	t	C	t	C	t	C	t	C	C	t	t	t	t	t	t	t	C	cds821;Name=YP_008637716.1;Parent=gene878;Dbxref=Genbank:YP_008637716.1,GeneID:17149508;gbkey=CDS;product=Hypothetical protein;protein_id=YP_008637716.1;transl_table=11 Hypothetical protein (1020138-1021169 +)	silent gat -> gaC;	1138 1420 1646 1680 1811 220 301 3035 XCP123
NC_022541.1	1020403	a	a	a	a	a	a	a	a	a	a	a	a	G	a	G	a	a	a	a	a	a	G	G	a	a	a	a	cds821;Name=YP_008637716.1;Parent=gene878;Dbxref=Genbank:YP_008637716.1,GeneID:17149508;gbkey=CDS;product=Hypothetical protein;protein_id=YP_008637716.1;transl_table=11 Hypothetical protein (1020138-1021169 +)	non-silent aac -> aGc;	1713 2064 556 557
NC_022541.1	1020443	c	c	c	c	c	c	c	c	c	c	c	c	G	c	G	c	c	c	c	c	c	G	G	c	c	c	c	cds821;Name=YP_008637716.1;Parent=gene878;Dbxref=Genbank:YP_008637716.1,GeneID:17149508;gbkey=CDS;product=Hypothetical protein;protein_id=YP_008637716.1;transl_table=11 Hypothetical protein (1020138-1021169 +)	silent ggc -> ggG;	1713 2064 556 557
NC_022541.1	1020449	t	t	t	C	t	t	C	t	t	C	t	C	C	C	C	C	t	C	C	t	t	C	C	t	t	t	C	cds821;Name=YP_008637716.1;Parent=gene878;Dbxref=Genbank:YP_008637716.1,GeneID:17149508;gbkey=CDS;product=Hypothetical protein;protein_id=YP_008637716.1;transl_table=11 Hypothetical protein (1020138-1021169 +)	silent agt -> agC;	1138 1420 1646 1680 1713 1811 2064 220 301 3035 556 557 XCP123
NC_022541.1	1020461	t	t	t	C	t	t	C	t	t	C	t	C	t	C	t	C	t	C	C	t	t	t	t	t	t	t	C	cds821;Name=YP_008637716.1;Parent=gene878;Dbxref=Genbank:YP_008637716.1,GeneID:17149508;gbkey=CDS;product=Hypothetical protein;protein_id=YP_008637716.1;transl_table=11 Hypothetical protein (1020138-1021169 +)	silent act -> acC;	1138 1420 1646 1680 1811 220 301 3035 XCP123
NC_022541.1	1020473	t	t	t	t	t	t	t	t	t	t	t	t	C	t	C	t	t	t	t	t	t	C	C	t	t	t	t	cds821;Name=YP_008637716.1;Parent=gene878;Dbxref=Genbank:YP_008637716.1,GeneID:17149508;gbkey=CDS;product=Hypothetical protein;protein_id=YP_008637716.1;transl_table=11 Hypothetical protein (1020138-1021169 +)	silent tat -> taC;	1713 2064 556 557
NC_022541.1	1020482	a	a	a	C	a	a	C	a	a	C	a	C	a	C	a	C	a	C	C	a	a	a	a	a	a	a	C	cds821;Name=YP_008637716.1;Parent=gene878;Dbxref=Genbank:YP_008637716.1,GeneID:17149508;gbkey=CDS;product=Hypothetical protein;protein_id=YP_008637716.1;transl_table=11 Hypothetical protein (1020138-1021169 +)	silent cca -> ccC;	1138 1420 1646 1680 1811 220 301 3035 XCP123
NC_022541.1	1020494	a	a	a	a	a	a	a	a	a	a	a	a	C	a	C	a	a	a	a	a	a	C	C	a	a	a	a	cds821;Name=YP_008637716.1;Parent=gene878;Dbxref=Genbank:YP_008637716.1,GeneID:17149508;gbkey=CDS;product=Hypothetical protein;protein_id=YP_008637716.1;transl_table=11 Hypothetical protein (1020138-1021169 +)	non-silent aaa -> aaC;	1713 2064 556 557
NC_022541.1	102053	g	g	g	C	g	g	C	g	g	C	g	C	g	C	g	C	g	C	C	g	g	g	g	g	g	g	C	cds82;Name=YP_008636977.1;Parent=gene85;Dbxref=Genbank:YP_008636977.1,GeneID:17152344;gbkey=CDS;product=putative LacI family transcriptional regulator;protein_id=YP_008636977.1;transl_table=11 putative LacI family transcriptional regulator (101822-102880 -)	silent gcc -> gcG;	1138 1420 1646 1680 1811 220 301 3035 XCP123
NC_022541.1	1020542	t	t	t	C	t	t	C	t	t	C	t	C	C	C	C	C	t	C	C	t	t	C	C	t	t	t	C	cds821;Name=YP_008637716.1;Parent=gene878;Dbxref=Genbank:YP_008637716.1,GeneID:17149508;gbkey=CDS;product=Hypothetical protein;protein_id=YP_008637716.1;transl_table=11 Hypothetical protein (1020138-1021169 +)	silent gat -> gaC;	1138 1420 1646 1680 1713 1811 2064 220 301 3035 556 557 XCP123
NC_022541.1	1020549	g	g	g	g	g	g	g	g	g	g	g	g	T	g	T	g	g	g	g	g	g	T	T	g	g	g	g	cds821;Name=YP_008637716.1;Parent=gene878;Dbxref=Genbank:YP_008637716.1,GeneID:17149508;gbkey=CDS;product=Hypothetical protein;protein_id=YP_008637716.1;transl_table=11 Hypothetical protein (1020138-1021169 +)	non-silent gtc -> Ttc;	1713 2064 556 557
NC_022541.1	102056	g	g	g	C	g	g	C	g	g	C	g	C	g	C	g	C	g	C	C	g	g	g	g	g	g	g	C	cds82;Name=YP_008636977.1;Parent=gene85;Dbxref=Genbank:YP_008636977.1,GeneID:17152344;gbkey=CDS;product=putative LacI family transcriptional regulator;protein_id=YP_008636977.1;transl_table=11 putative LacI family transcriptional regulator (101822-102880 -)	silent gtc -> gtG;	1138 1420 1646 1680 1811 220 301 3035 XCP123
NC_022541.1	1020593	t	t	t	C	t	t	C	t	t	C	t	C	t	C	t	C	t	C	C	t	t	t	t	t	t	t	C	cds821;Name=YP_008637716.1;Parent=gene878;Dbxref=Genbank:YP_008637716.1,GeneID:17149508;gbkey=CDS;product=Hypothetical protein;protein_id=YP_008637716.1;transl_table=11 Hypothetical protein (1020138-1021169 +)	silent ggt -> ggC;	1138 1420 1646 1680 1811 220 301 3035 XCP123
NC_022541.1	1020632	g	g	g	A	g	g	A	g	g	A	g	A	A	A	A	A	g	A	A	g	g	A	A	g	g	g	A	cds821;Name=YP_008637716.1;Parent=gene878;Dbxref=Genbank:YP_008637716.1,GeneID:17149508;gbkey=CDS;product=Hypothetical protein;protein_id=YP_008637716.1;transl_table=11 Hypothetical protein (1020138-1021169 +)	silent ccg -> ccA;	1138 1420 1646 1680 1713 1811 2064 220 301 3035 556 557 XCP123
NC_022541.1	1020636	g	g	g	g	g	g	g	g	g	g	g	g	T	g	T	g	g	g	g	g	g	T	T	g	g	g	g	cds821;Name=YP_008637716.1;Parent=gene878;Dbxref=Genbank:YP_008637716.1,GeneID:17149508;gbkey=CDS;product=Hypothetical protein;protein_id=YP_008637716.1;transl_table=11 Hypothetical protein (1020138-1021169 +)	non-silent gtg -> Ttg;	1713 2064 556 557
NC_022541.1	1020650	g	g	g	A	g	g	A	g	g	A	g	A	g	A	g	A	g	A	A	g	g	g	g	g	g	g	A	cds821;Name=YP_008637716.1;Parent=gene878;Dbxref=Genbank:YP_008637716.1,GeneID:17149508;gbkey=CDS;product=Hypothetical protein;protein_id=YP_008637716.1;transl_table=11 Hypothetical protein (1020138-1021169 +)	silent ggg -> ggA;	1138 1420 1646 1680 1811 220 301 3035 XCP123
NC_022541.1	1020656	a	a	a	G	a	a	G	a	a	G	a	G	a	G	a	G	a	G	G	a	a	a	a	a	a	a	G	cds821;Name=YP_008637716.1;Parent=gene878;Dbxref=Genbank:YP_008637716.1,GeneID:17149508;gbkey=CDS;product=Hypothetical protein;protein_id=YP_008637716.1;transl_table=11 Hypothetical protein (1020138-1021169 +)	silent gta -> gtG;	1138 1420 1646 1680 1811 220 301 3035 XCP123
NC_022541.1	1020671	a	a	a	G	a	a	G	a	a	G	a	G	a	G	a	G	a	G	G	a	a	a	a	a	a	a	G	cds821;Name=YP_008637716.1;Parent=gene878;Dbxref=Genbank:YP_008637716.1,GeneID:17149508;gbkey=CDS;product=Hypothetical protein;protein_id=YP_008637716.1;transl_table=11 Hypothetical protein (1020138-1021169 +)	silent cga -> cgG;	1138 1420 1646 1680 1811 220 301 3035 XCP123
NC_022541.1	1020674	c	c	c	T	c	c	T	c	c	T	c	T	T	T	T	T	c	T	T	c	c	T	T	c	c	c	T	cds821;Name=YP_008637716.1;Parent=gene878;Dbxref=Genbank:YP_008637716.1,GeneID:17149508;gbkey=CDS;product=Hypothetical protein;protein_id=YP_008637716.1;transl_table=11 Hypothetical protein (1020138-1021169 +)	silent ttc -> ttT;	1138 1420 1646 1680 1713 1811 2064 220 301 3035 556 557 XCP123
NC_022541.1	1020683	c	c	c	T	c	c	T	c	c	T	c	T	c	T	c	T	c	T	T	c	c	c	c	c	c	c	T	cds821;Name=YP_008637716.1;Parent=gene878;Dbxref=Genbank:YP_008637716.1,GeneID:17149508;gbkey=CDS;product=Hypothetical protein;protein_id=YP_008637716.1;transl_table=11 Hypothetical protein (1020138-1021169 +)	silent gac -> gaT;	1138 1420 1646 1680 1811 220 301 3035 XCP123
NC_022541.1	10207	a	a	a	C	a	a	C	a	a	C	a	C	C	C	C	C	a	C	C	a	a	C	C	a	a	a	C	cds6;Name=YP_008636901.1;Parent=gene6;Dbxref=Genbank:YP_008636901.1,GeneID:17148936;gbkey=CDS;product=hypothetical protein;protein_id=YP_008636901.1;transl_table=11 hypothetical protein (9578-10771 +)	silent cca -> ccC;	1138 1420 1646 1680 1713 1811 2064 220 301 3035 556 557 XCP123
NC_022541.1	1020734	c	c	c	c	c	c	c	c	c	c	c	c	T	c	T	c	c	c	c	c	c	T	T	c	c	c	c	cds821;Name=YP_008637716.1;Parent=gene878;Dbxref=Genbank:YP_008637716.1,GeneID:17149508;gbkey=CDS;product=Hypothetical protein;protein_id=YP_008637716.1;transl_table=11 Hypothetical protein (1020138-1021169 +)	silent agc -> agT;	1713 2064 556 557
NC_022541.1	1020743	c	c	c	T	c	c	T	c	c	T	c	T	c	T	c	T	c	T	T	c	c	c	c	c	c	c	T	cds821;Name=YP_008637716.1;Parent=gene878;Dbxref=Genbank:YP_008637716.1,GeneID:17149508;gbkey=CDS;product=Hypothetical protein;protein_id=YP_008637716.1;transl_table=11 Hypothetical protein (1020138-1021169 +)	silent ttc -> ttT;	1138 1420 1646 1680 1811 220 301 3035 XCP123
NC_022541.1	1020761	c	c	c	T	c	c	T	c	c	T	c	T	T	T	T	T	c	T	T	c	c	T	T	c	c	c	T	cds821;Name=YP_008637716.1;Parent=gene878;Dbxref=Genbank:YP_008637716.1,GeneID:17149508;gbkey=CDS;product=Hypothetical protein;protein_id=YP_008637716.1;transl_table=11 Hypothetical protein (1020138-1021169 +)	silent cac -> caT;	1138 1420 1646 1680 1713 1811 2064 220 301 3035 556 557 XCP123
NC_022541.1	1020790	g	g	g	g	g	g	g	g	g	g	g	g	A	g	A	g	g	g	g	g	g	A	A	g	g	g	g	cds821;Name=YP_008637716.1;Parent=gene878;Dbxref=Genbank:YP_008637716.1,GeneID:17149508;gbkey=CDS;product=Hypothetical protein;protein_id=YP_008637716.1;transl_table=11 Hypothetical protein (1020138-1021169 +)	non-silent agt -> aAt;	1713 2064 556 557
NC_022541.1	1020790	g	g	g	C	g	g	C	g	g	C	g	C	g	C	g	C	g	C	C	g	g	g	g	g	g	g	C	cds821;Name=YP_008637716.1;Parent=gene878;Dbxref=Genbank:YP_008637716.1,GeneID:17149508;gbkey=CDS;product=Hypothetical protein;protein_id=YP_008637716.1;transl_table=11 Hypothetical protein (1020138-1021169 +)	non-silent agt -> aCt;	1138 1420 1646 1680 1811 220 301 3035 XCP123
NC_022541.1	1020845	c	c	c	A	c	c	A	c	c	A	c	A	c	A	c	A	c	A	A	c	c	c	c	c	c	c	A	cds821;Name=YP_008637716.1;Parent=gene878;Dbxref=Genbank:YP_008637716.1,GeneID:17149508;gbkey=CDS;product=Hypothetical protein;protein_id=YP_008637716.1;transl_table=11 Hypothetical protein (1020138-1021169 +)	silent gcc -> gcA;	1138 1420 1646 1680 1811 220 301 3035 XCP123
NC_022541.1	1020846	g	g	g	g	g	g	g	g	g	g	g	g	g	g	T	g	g	g	g	g	g	T	T	g	g	g	g	cds821;Name=YP_008637716.1;Parent=gene878;Dbxref=Genbank:YP_008637716.1,GeneID:17149508;gbkey=CDS;product=Hypothetical protein;protein_id=YP_008637716.1;transl_table=11 Hypothetical protein (1020138-1021169 +)	non-silent ggt -> Tgt;	2064 556 557
NC_022541.1	1020859	t	t	t	C	t	t	C	t	t	C	t	C	C	C	C	C	t	C	C	t	t	C	C	t	t	t	C	cds821;Name=YP_008637716.1;Parent=gene878;Dbxref=Genbank:YP_008637716.1,GeneID:17149508;gbkey=CDS;product=Hypothetical protein;protein_id=YP_008637716.1;transl_table=11 Hypothetical protein (1020138-1021169 +)	non-silent ctg -> cCg;	1138 1420 1646 1680 1713 1811 2064 220 301 3035 556 557 XCP123
NC_022541.1	1020935	c	c	c	c	c	c	c	c	c	c	c	c	T	c	T	c	c	c	c	c	c	T	T	c	c	c	c	cds821;Name=YP_008637716.1;Parent=gene878;Dbxref=Genbank:YP_008637716.1,GeneID:17149508;gbkey=CDS;product=Hypothetical protein;protein_id=YP_008637716.1;transl_table=11 Hypothetical protein (1020138-1021169 +)	silent gtc -> gtT;	1713 2064 556 557
NC_022541.1	1020941	a	a	a	G	a	a	G	a	a	G	a	G	a	G	a	G	a	G	G	a	a	a	a	a	a	a	G	cds821;Name=YP_008637716.1;Parent=gene878;Dbxref=Genbank:YP_008637716.1,GeneID:17149508;gbkey=CDS;product=Hypothetical protein;protein_id=YP_008637716.1;transl_table=11 Hypothetical protein (1020138-1021169 +)	silent gaa -> gaG;	1138 1420 1646 1680 1811 220 301 3035 XCP123
NC_022541.1	1020965	a	a	a	G	a	a	G	a	a	G	a	G	G	G	G	G	a	G	G	a	a	G	G	a	a	a	G	cds821;Name=YP_008637716.1;Parent=gene878;Dbxref=Genbank:YP_008637716.1,GeneID:17149508;gbkey=CDS;product=Hypothetical protein;protein_id=YP_008637716.1;transl_table=11 Hypothetical protein (1020138-1021169 +)	silent gga -> ggG;	1138 1420 1646 1680 1713 1811 2064 220 301 3035 556 557 XCP123
NC_022541.1	1020994	g	g	g	A	g	g	A	g	g	A	g	A	g	A	g	A	g	A	A	g	g	g	g	g	g	g	A	cds821;Name=YP_008637716.1;Parent=gene878;Dbxref=Genbank:YP_008637716.1,GeneID:17149508;gbkey=CDS;product=Hypothetical protein;protein_id=YP_008637716.1;transl_table=11 Hypothetical protein (1020138-1021169 +)	non-silent cgc -> cAc;	1138 1420 1646 1680 1811 220 301 3035 XCP123
NC_022541.1	1021008	a	a	a	G	a	a	G	a	a	G	a	G	a	G	a	G	a	G	G	a	a	a	a	a	a	a	G	cds821;Name=YP_008637716.1;Parent=gene878;Dbxref=Genbank:YP_008637716.1,GeneID:17149508;gbkey=CDS;product=Hypothetical protein;protein_id=YP_008637716.1;transl_table=11 Hypothetical protein (1020138-1021169 +)	non-silent agc -> Ggc;	1138 1420 1646 1680 1811 220 301 3035 XCP123
NC_022541.1	1021011	a	a	a	G	a	a	G	a	a	G	a	G	a	G	a	G	a	G	G	a	a	a	a	a	a	a	G	cds821;Name=YP_008637716.1;Parent=gene878;Dbxref=Genbank:YP_008637716.1,GeneID:17149508;gbkey=CDS;product=Hypothetical protein;protein_id=YP_008637716.1;transl_table=11 Hypothetical protein (1020138-1021169 +)	non-silent atc -> Gtc;	1138 1420 1646 1680 1811 220 301 3035 XCP123
NC_022541.1	1021049	t	t	t	C	t	t	C	t	t	C	t	C	t	C	t	C	t	C	C	t	t	t	t	t	t	t	C	cds821;Name=YP_008637716.1;Parent=gene878;Dbxref=Genbank:YP_008637716.1,GeneID:17149508;gbkey=CDS;product=Hypothetical protein;protein_id=YP_008637716.1;transl_table=11 Hypothetical protein (1020138-1021169 +)	silent cct -> ccC;	1138 1420 1646 1680 1811 220 301 3035 XCP123
NC_022541.1	1021097	t	t	t	G	t	t	G	t	t	G	t	G	t	G	t	G	t	G	G	t	t	t	t	t	t	t	G	cds821;Name=YP_008637716.1;Parent=gene878;Dbxref=Genbank:YP_008637716.1,GeneID:17149508;gbkey=CDS;product=Hypothetical protein;protein_id=YP_008637716.1;transl_table=11 Hypothetical protein (1020138-1021169 +)	silent gtt -> gtG;	1138 1420 1646 1680 1811 220 301 3035 XCP123
NC_022541.1	102110	c	c	c	G	c	c	G	c	c	G	c	G	c	G	c	G	c	G	G	c	c	c	c	c	c	c	G	cds82;Name=YP_008636977.1;Parent=gene85;Dbxref=Genbank:YP_008636977.1,GeneID:17152344;gbkey=CDS;product=putative LacI family transcriptional regulator;protein_id=YP_008636977.1;transl_table=11 putative LacI family transcriptional regulator (101822-102880 -)	silent cgg -> cgC;	1138 1420 1646 1680 1811 220 301 3035 XCP123
NC_022541.1	1021103	c	c	c	G	c	c	G	c	c	G	c	G	c	G	c	G	c	G	G	c	c	c	c	c	c	c	G	cds821;Name=YP_008637716.1;Parent=gene878;Dbxref=Genbank:YP_008637716.1,GeneID:17149508;gbkey=CDS;product=Hypothetical protein;protein_id=YP_008637716.1;transl_table=11 Hypothetical protein (1020138-1021169 +)	silent ctc -> ctG;	1138 1420 1646 1680 1811 220 301 3035 XCP123
NC_022541.1	1021107	c	c	c	A	c	c	A	c	c	A	c	A	A	A	A	A	c	A	A	c	c	A	A	c	c	c	A	cds821;Name=YP_008637716.1;Parent=gene878;Dbxref=Genbank:YP_008637716.1,GeneID:17149508;gbkey=CDS;product=Hypothetical protein;protein_id=YP_008637716.1;transl_table=11 Hypothetical protein (1020138-1021169 +)	non-silent ctc -> Atc;	1138 1420 1646 1680 1713 1811 2064 220 301 3035 556 557 XCP123
NC_022541.1	102113	t	t	t	C	t	t	C	t	t	C	t	C	t	C	t	C	t	C	C	t	t	t	t	t	t	t	C	cds82;Name=YP_008636977.1;Parent=gene85;Dbxref=Genbank:YP_008636977.1,GeneID:17152344;gbkey=CDS;product=putative LacI family transcriptional regulator;protein_id=YP_008636977.1;transl_table=11 putative LacI family transcriptional regulator (101822-102880 -)	silent aaa -> aaG;	1138 1420 1646 1680 1811 220 301 3035 XCP123
NC_022541.1	1021142	t	t	t	C	t	t	C	t	t	C	t	C	t	C	t	C	t	C	C	t	t	t	t	t	t	t	C	cds821;Name=YP_008637716.1;Parent=gene878;Dbxref=Genbank:YP_008637716.1,GeneID:17149508;gbkey=CDS;product=Hypothetical protein;protein_id=YP_008637716.1;transl_table=11 Hypothetical protein (1020138-1021169 +)	silent tat -> taC;	1138 1420 1646 1680 1811 220 301 3035 XCP123
NC_022541.1	1021154	c	c	c	c	c	c	c	c	c	c	c	c	T	c	T	c	c	c	c	c	c	T	T	c	c	c	c	cds821;Name=YP_008637716.1;Parent=gene878;Dbxref=Genbank:YP_008637716.1,GeneID:17149508;gbkey=CDS;product=Hypothetical protein;protein_id=YP_008637716.1;transl_table=11 Hypothetical protein (1020138-1021169 +)	silent atc -> atT;	1713 2064 556 557
NC_022541.1	1021164	c	c	c	c	c	c	c	c	c	c	c	c	T	c	c	c	c	c	c	c	c	c	c	c	c	c	c	cds821;Name=YP_008637716.1;Parent=gene878;Dbxref=Genbank:YP_008637716.1,GeneID:17149508;gbkey=CDS;product=Hypothetical protein;protein_id=YP_008637716.1;transl_table=11 Hypothetical protein (1020138-1021169 +)	silent ctg -> Ttg;	1713
NC_022541.1	1021191	a	a	a	G	a	a	G	a	a	G	a	G	a	G	a	G	a	G	G	a	a	a	a	a	a	a	G			1138 1420 1646 1680 1811 220 301 3035 XCP123
NC_022541.1	1021375	g	g	g	A	g	g	A	g	g	A	g	A	g	A	g	A	g	A	A	g	g	g	g	g	g	g	A	cds822;Name=YP_008637717.1;Parent=gene879;Dbxref=Genbank:YP_008637717.1,GeneID:17149509;gbkey=CDS;gene=csiR;product=DNA-binding transcriptional dual regulator;protein_id=YP_008637717.1;transl_table=11 DNA-binding transcriptional dual regulator (1021342-1022007 -)	silent cac -> caT;	1138 1420 1646 1680 1811 220 301 3035 XCP123
NC_022541.1	1021384	a	a	a	G	a	a	G	a	a	G	a	G	G	G	G	G	a	G	G	a	a	G	G	a	a	a	G	cds822;Name=YP_008637717.1;Parent=gene879;Dbxref=Genbank:YP_008637717.1,GeneID:17149509;gbkey=CDS;gene=csiR;product=DNA-binding transcriptional dual regulator;protein_id=YP_008637717.1;transl_table=11 DNA-binding transcriptional dual regulator (1021342-1022007 -)	silent ttt -> ttC;	1138 1420 1646 1680 1713 1811 2064 220 301 3035 556 557 XCP123
NC_022541.1	1021390	t	t	t	C	t	t	C	t	t	C	t	C	t	C	t	C	t	C	C	t	t	t	t	t	t	t	C	cds822;Name=YP_008637717.1;Parent=gene879;Dbxref=Genbank:YP_008637717.1,GeneID:17149509;gbkey=CDS;gene=csiR;product=DNA-binding transcriptional dual regulator;protein_id=YP_008637717.1;transl_table=11 DNA-binding transcriptional dual regulator (1021342-1022007 -)	silent tta -> ttG;	1138 1420 1646 1680 1811 220 301 3035 XCP123
NC_022541.1	1021396	c	c	c	G	c	c	G	c	c	G	c	G	c	G	c	G	c	G	G	c	c	c	c	c	c	c	G	cds822;Name=YP_008637717.1;Parent=gene879;Dbxref=Genbank:YP_008637717.1,GeneID:17149509;gbkey=CDS;gene=csiR;product=DNA-binding transcriptional dual regulator;protein_id=YP_008637717.1;transl_table=11 DNA-binding transcriptional dual regulator (1021342-1022007 -)	silent gcg -> gcC;	1138 1420 1646 1680 1811 220 301 3035 XCP123
NC_022541.1	102140	c	c	c	G	c	c	G	c	c	G	c	G	c	G	c	G	c	G	G	c	c	c	c	c	c	c	G	cds82;Name=YP_008636977.1;Parent=gene85;Dbxref=Genbank:YP_008636977.1,GeneID:17152344;gbkey=CDS;product=putative LacI family transcriptional regulator;protein_id=YP_008636977.1;transl_table=11 putative LacI family transcriptional regulator (101822-102880 -)	silent gcg -> gcC;	1138 1420 1646 1680 1811 220 301 3035 XCP123
NC_022541.1	1021417	c	c	c	T	c	c	T	c	c	T	c	T	T	T	T	T	c	T	T	c	c	T	T	c	c	c	T	cds822;Name=YP_008637717.1;Parent=gene879;Dbxref=Genbank:YP_008637717.1,GeneID:17149509;gbkey=CDS;gene=csiR;product=DNA-binding transcriptional dual regulator;protein_id=YP_008637717.1;transl_table=11 DNA-binding transcriptional dual regulator (1021342-1022007 -)	silent gag -> gaA;	1138 1420 1646 1680 1713 1811 2064 220 301 3035 556 557 XCP123
NC_022541.1	1021429	c	c	c	c	c	c	c	c	c	c	c	c	A	c	A	c	c	c	c	c	c	A	A	c	c	c	c	cds822;Name=YP_008637717.1;Parent=gene879;Dbxref=Genbank:YP_008637717.1,GeneID:17149509;gbkey=CDS;gene=csiR;product=DNA-binding transcriptional dual regulator;protein_id=YP_008637717.1;transl_table=11 DNA-binding transcriptional dual regulator (1021342-1022007 -)	silent gtg -> gtT;	1713 2064 556 557
NC_022541.1	1021429	c	c	c	G	c	c	G	c	c	G	c	G	c	G	c	G	c	G	G	c	c	c	c	c	c	c	G	cds822;Name=YP_008637717.1;Parent=gene879;Dbxref=Genbank:YP_008637717.1,GeneID:17149509;gbkey=CDS;gene=csiR;product=DNA-binding transcriptional dual regulator;protein_id=YP_008637717.1;transl_table=11 DNA-binding transcriptional dual regulator (1021342-1022007 -)	silent gtg -> gtC;	1138 1420 1646 1680 1811 220 301 3035 XCP123
NC_022541.1	102143	c	c	c	G	c	c	G	c	c	G	c	G	c	G	c	G	c	G	G	c	c	c	c	c	c	c	G	cds82;Name=YP_008636977.1;Parent=gene85;Dbxref=Genbank:YP_008636977.1,GeneID:17152344;gbkey=CDS;product=putative LacI family transcriptional regulator;protein_id=YP_008636977.1;transl_table=11 putative LacI family transcriptional regulator (101822-102880 -)	silent gcg -> gcC;	1138 1420 1646 1680 1811 220 301 3035 XCP123
NC_022541.1	1021435	c	c	c	G	c	c	G	c	c	G	c	G	c	G	c	G	c	G	G	c	c	c	c	c	c	c	G	cds822;Name=YP_008637717.1;Parent=gene879;Dbxref=Genbank:YP_008637717.1,GeneID:17149509;gbkey=CDS;gene=csiR;product=DNA-binding transcriptional dual regulator;protein_id=YP_008637717.1;transl_table=11 DNA-binding transcriptional dual regulator (1021342-1022007 -)	silent gcg -> gcC;	1138 1420 1646 1680 1811 220 301 3035 XCP123
NC_022541.1	1021453	t	t	t	C	t	t	C	t	t	C	t	C	t	C	t	C	t	C	C	t	t	t	t	t	t	t	C	cds822;Name=YP_008637717.1;Parent=gene879;Dbxref=Genbank:YP_008637717.1,GeneID:17149509;gbkey=CDS;gene=csiR;product=DNA-binding transcriptional dual regulator;protein_id=YP_008637717.1;transl_table=11 DNA-binding transcriptional dual regulator (1021342-1022007 -)	silent gga -> ggG;	1138 1420 1646 1680 1811 220 301 3035 XCP123
NC_022541.1	1021477	a	a	a	G	a	a	G	a	a	G	a	G	a	G	a	G	a	G	G	a	a	a	a	a	a	a	G	cds822;Name=YP_008637717.1;Parent=gene879;Dbxref=Genbank:YP_008637717.1,GeneID:17149509;gbkey=CDS;gene=csiR;product=DNA-binding transcriptional dual regulator;protein_id=YP_008637717.1;transl_table=11 DNA-binding transcriptional dual regulator (1021342-1022007 -)	silent ctt -> ctC;	1138 1420 1646 1680 1811 220 301 3035 XCP123
NC_022541.1	1021483	g	g	g	A	g	g	A	g	g	A	g	A	g	A	g	A	g	A	A	g	g	g	g	g	g	g	A	cds822;Name=YP_008637717.1;Parent=gene879;Dbxref=Genbank:YP_008637717.1,GeneID:17149509;gbkey=CDS;gene=csiR;product=DNA-binding transcriptional dual regulator;protein_id=YP_008637717.1;transl_table=11 DNA-binding transcriptional dual regulator (1021342-1022007 -)	silent gcc -> gcT;	1138 1420 1646 1680 1811 220 301 3035 XCP123
NC_022541.1	102149	g	g	g	g	g	g	g	g	g	g	g	g	g	g	A	g	g	g	g	g	g	A	A	g	g	g	g	cds82;Name=YP_008636977.1;Parent=gene85;Dbxref=Genbank:YP_008636977.1,GeneID:17152344;gbkey=CDS;product=putative LacI family transcriptional regulator;protein_id=YP_008636977.1;transl_table=11 putative LacI family transcriptional regulator (101822-102880 -)	silent ggc -> ggT;	2064 556 557
NC_022541.1	102152	g	g	g	C	g	g	C	g	g	C	g	C	g	C	g	C	g	C	C	g	g	g	g	g	g	g	C	cds82;Name=YP_008636977.1;Parent=gene85;Dbxref=Genbank:YP_008636977.1,GeneID:17152344;gbkey=CDS;product=putative LacI family transcriptional regulator;protein_id=YP_008636977.1;transl_table=11 putative LacI family transcriptional regulator (101822-102880 -)	silent tcc -> tcG;	1138 1420 1646 1680 1811 220 301 3035 XCP123
NC_022541.1	1021533	a	a	a	G	a	a	G	a	a	G	a	G	a	G	a	G	a	G	G	a	a	a	a	a	a	a	G	cds822;Name=YP_008637717.1;Parent=gene879;Dbxref=Genbank:YP_008637717.1,GeneID:17149509;gbkey=CDS;gene=csiR;product=DNA-binding transcriptional dual regulator;protein_id=YP_008637717.1;transl_table=11 DNA-binding transcriptional dual regulator (1021342-1022007 -)	silent ttg -> Ctg;	1138 1420 1646 1680 1811 220 301 3035 XCP123
NC_022541.1	1021594	g	g	g	A	g	g	A	g	g	A	g	A	g	A	g	A	g	A	A	g	g	g	g	g	g	g	A	cds822;Name=YP_008637717.1;Parent=gene879;Dbxref=Genbank:YP_008637717.1,GeneID:17149509;gbkey=CDS;gene=csiR;product=DNA-binding transcriptional dual regulator;protein_id=YP_008637717.1;transl_table=11 DNA-binding transcriptional dual regulator (1021342-1022007 -)	silent cac -> caT;	1138 1420 1646 1680 1811 220 301 3035 XCP123
NC_022541.1	1021630	a	a	a	G	a	a	G	a	a	G	a	G	a	G	a	G	a	G	G	a	a	a	a	a	a	a	G	cds822;Name=YP_008637717.1;Parent=gene879;Dbxref=Genbank:YP_008637717.1,GeneID:17149509;gbkey=CDS;gene=csiR;product=DNA-binding transcriptional dual regulator;protein_id=YP_008637717.1;transl_table=11 DNA-binding transcriptional dual regulator (1021342-1022007 -)	silent gat -> gaC;	1138 1420 1646 1680 1811 220 301 3035 XCP123
NC_022541.1	1021645	g	g	g	A	g	g	A	g	g	A	g	A	g	A	g	A	g	A	A	g	g	g	g	g	g	g	A	cds822;Name=YP_008637717.1;Parent=gene879;Dbxref=Genbank:YP_008637717.1,GeneID:17149509;gbkey=CDS;gene=csiR;product=DNA-binding transcriptional dual regulator;protein_id=YP_008637717.1;transl_table=11 DNA-binding transcriptional dual regulator (1021342-1022007 -)	silent acc -> acT;	1138 1420 1646 1680 1811 220 301 3035 XCP123
NC_022541.1	1021646	g	g	g	T	g	g	T	g	g	T	g	T	T	T	T	T	g	T	T	g	g	T	T	g	g	g	T	cds822;Name=YP_008637717.1;Parent=gene879;Dbxref=Genbank:YP_008637717.1,GeneID:17149509;gbkey=CDS;gene=csiR;product=DNA-binding transcriptional dual regulator;protein_id=YP_008637717.1;transl_table=11 DNA-binding transcriptional dual regulator (1021342-1022007 -)	non-silent acc -> aAc;	1138 1420 1646 1680 1713 1811 2064 220 301 3035 556 557 XCP123
NC_022541.1	102167	a	a	a	G	a	a	G	a	a	G	a	G	a	G	a	G	a	G	G	a	a	a	a	a	a	a	G	cds82;Name=YP_008636977.1;Parent=gene85;Dbxref=Genbank:YP_008636977.1,GeneID:17152344;gbkey=CDS;product=putative LacI family transcriptional regulator;protein_id=YP_008636977.1;transl_table=11 putative LacI family transcriptional regulator (101822-102880 -)	silent ggt -> ggC;	1138 1420 1646 1680 1811 220 301 3035 XCP123
NC_022541.1	1021681	g	g	g	g	g	g	g	g	g	g	g	g	A	g	A	g	g	g	g	g	g	A	A	g	g	g	g	cds822;Name=YP_008637717.1;Parent=gene879;Dbxref=Genbank:YP_008637717.1,GeneID:17149509;gbkey=CDS;gene=csiR;product=DNA-binding transcriptional dual regulator;protein_id=YP_008637717.1;transl_table=11 DNA-binding transcriptional dual regulator (1021342-1022007 -)	silent tgc -> tgT;	1713 2064 556 557
NC_022541.1	1021687	a	a	a	G	a	a	G	a	a	G	a	G	a	G	a	G	a	G	G	a	a	a	a	a	a	a	G	cds822;Name=YP_008637717.1;Parent=gene879;Dbxref=Genbank:YP_008637717.1,GeneID:17149509;gbkey=CDS;gene=csiR;product=DNA-binding transcriptional dual regulator;protein_id=YP_008637717.1;transl_table=11 DNA-binding transcriptional dual regulator (1021342-1022007 -)	silent tat -> taC;	1138 1420 1646 1680 1811 220 301 3035 XCP123
NC_022541.1	1021689	a	a	a	G	a	a	G	a	a	G	a	G	G	G	G	G	a	G	G	a	a	G	G	a	a	a	G	cds822;Name=YP_008637717.1;Parent=gene879;Dbxref=Genbank:YP_008637717.1,GeneID:17149509;gbkey=CDS;gene=csiR;product=DNA-binding transcriptional dual regulator;protein_id=YP_008637717.1;transl_table=11 DNA-binding transcriptional dual regulator (1021342-1022007 -)	non-silent tat -> Cat;	1138 1420 1646 1680 1713 1811 2064 220 301 3035 556 557 XCP123
NC_022541.1	1021693	c	c	c	G	c	c	G	c	c	G	c	G	c	G	c	G	c	G	G	c	c	c	c	c	c	c	G	cds822;Name=YP_008637717.1;Parent=gene879;Dbxref=Genbank:YP_008637717.1,GeneID:17149509;gbkey=CDS;gene=csiR;product=DNA-binding transcriptional dual regulator;protein_id=YP_008637717.1;transl_table=11 DNA-binding transcriptional dual regulator (1021342-1022007 -)	silent acg -> acC;	1138 1420 1646 1680 1811 220 301 3035 XCP123
NC_022541.1	1021704	g	g	g	A	g	g	A	g	g	A	g	A	g	A	g	A	g	A	A	g	g	g	g	g	g	g	A	cds822;Name=YP_008637717.1;Parent=gene879;Dbxref=Genbank:YP_008637717.1,GeneID:17149509;gbkey=CDS;gene=csiR;product=DNA-binding transcriptional dual regulator;protein_id=YP_008637717.1;transl_table=11 DNA-binding transcriptional dual regulator (1021342-1022007 -)	silent ctg -> Ttg;	1138 1420 1646 1680 1811 220 301 3035 XCP123
NC_022541.1	1021705	c	c	c	T	c	c	T	c	c	T	c	T	c	T	c	T	c	T	T	c	c	c	c	c	c	c	T	cds822;Name=YP_008637717.1;Parent=gene879;Dbxref=Genbank:YP_008637717.1,GeneID:17149509;gbkey=CDS;gene=csiR;product=DNA-binding transcriptional dual regulator;protein_id=YP_008637717.1;transl_table=11 DNA-binding transcriptional dual regulator (1021342-1022007 -)	silent gag -> gaA;	1138 1420 1646 1680 1811 220 301 3035 XCP123
NC_022541.1	1021713	g	g	g	C	g	g	C	g	g	C	g	C	g	C	g	C	g	C	C	g	g	g	g	g	g	g	C	cds822;Name=YP_008637717.1;Parent=gene879;Dbxref=Genbank:YP_008637717.1,GeneID:17149509;gbkey=CDS;gene=csiR;product=DNA-binding transcriptional dual regulator;protein_id=YP_008637717.1;transl_table=11 DNA-binding transcriptional dual regulator (1021342-1022007 -)	non-silent ccc -> Gcc;	1138 1420 1646 1680 1811 220 301 3035 XCP123
NC_022541.1	1021721	c	c	c	c	c	c	c	c	c	c	c	c	T	c	T	c	c	c	c	c	c	T	T	c	c	c	c	cds822;Name=YP_008637717.1;Parent=gene879;Dbxref=Genbank:YP_008637717.1,GeneID:17149509;gbkey=CDS;gene=csiR;product=DNA-binding transcriptional dual regulator;protein_id=YP_008637717.1;transl_table=11 DNA-binding transcriptional dual regulator (1021342-1022007 -)	non-silent cgg -> cAg;	1713 2064 556 557
NC_022541.1	1021731	c	c	c	T	c	c	T	c	c	T	c	T	c	T	c	T	c	T	T	c	c	c	c	c	c	c	T	cds822;Name=YP_008637717.1;Parent=gene879;Dbxref=Genbank:YP_008637717.1,GeneID:17149509;gbkey=CDS;gene=csiR;product=DNA-binding transcriptional dual regulator;protein_id=YP_008637717.1;transl_table=11 DNA-binding transcriptional dual regulator (1021342-1022007 -)	non-silent gtc -> Atc;	1138 1420 1646 1680 1811 220 301 3035 XCP123
NC_022541.1	1021738	t	t	t	C	t	t	C	t	t	C	t	C	t	C	t	C	t	C	C	t	t	t	t	t	t	t	C	cds822;Name=YP_008637717.1;Parent=gene879;Dbxref=Genbank:YP_008637717.1,GeneID:17149509;gbkey=CDS;gene=csiR;product=DNA-binding transcriptional dual regulator;protein_id=YP_008637717.1;transl_table=11 DNA-binding transcriptional dual regulator (1021342-1022007 -)	silent gca -> gcG;	1138 1420 1646 1680 1811 220 301 3035 XCP123
NC_022541.1	1021758	c	c	c	c	c	c	c	c	c	c	c	c	T	c	T	c	c	c	c	c	c	T	T	c	c	c	c	cds822;Name=YP_008637717.1;Parent=gene879;Dbxref=Genbank:YP_008637717.1,GeneID:17149509;gbkey=CDS;gene=csiR;product=DNA-binding transcriptional dual regulator;protein_id=YP_008637717.1;transl_table=11 DNA-binding transcriptional dual regulator (1021342-1022007 -)	non-silent gtg -> Atg;	1713 2064 556 557
NC_022541.1	1021774	t	t	t	t	t	t	t	t	t	t	t	t	G	t	G	t	t	t	t	t	t	G	G	t	t	t	t	cds822;Name=YP_008637717.1;Parent=gene879;Dbxref=Genbank:YP_008637717.1,GeneID:17149509;gbkey=CDS;gene=csiR;product=DNA-binding transcriptional dual regulator;protein_id=YP_008637717.1;transl_table=11 DNA-binding transcriptional dual regulator (1021342-1022007 -)	silent gca -> gcC;	1713 2064 556 557
NC_022541.1	102179	g	g	g	g	g	g	g	g	g	g	g	g	A	g	A	g	g	g	g	g	g	A	A	g	g	g	g	cds82;Name=YP_008636977.1;Parent=gene85;Dbxref=Genbank:YP_008636977.1,GeneID:17152344;gbkey=CDS;product=putative LacI family transcriptional regulator;protein_id=YP_008636977.1;transl_table=11 putative LacI family transcriptional regulator (101822-102880 -)	silent atc -> atT;	1713 2064 556 557
NC_022541.1	1021828	c	c	c	T	c	c	T	c	c	T	c	T	c	T	c	T	c	T	T	c	c	c	c	c	c	c	T	cds822;Name=YP_008637717.1;Parent=gene879;Dbxref=Genbank:YP_008637717.1,GeneID:17149509;gbkey=CDS;gene=csiR;product=DNA-binding transcriptional dual regulator;protein_id=YP_008637717.1;transl_table=11 DNA-binding transcriptional dual regulator (1021342-1022007 -)	silent gcg -> gcA;	1138 1420 1646 1680 1811 220 301 3035 XCP123
NC_022541.1	1021843	c	c	c	G	c	c	G	c	c	G	c	G	G	G	G	G	c	G	G	c	c	G	G	c	c	c	G	cds822;Name=YP_008637717.1;Parent=gene879;Dbxref=Genbank:YP_008637717.1,GeneID:17149509;gbkey=CDS;gene=csiR;product=DNA-binding transcriptional dual regulator;protein_id=YP_008637717.1;transl_table=11 DNA-binding transcriptional dual regulator (1021342-1022007 -)	silent ggg -> ggC;	1138 1420 1646 1680 1713 1811 2064 220 301 3035 556 557 XCP123
NC_022541.1	1021912	t	t	t	C	t	t	C	t	t	C	t	C	t	C	t	C	t	C	C	t	t	t	t	t	t	t	C	cds822;Name=YP_008637717.1;Parent=gene879;Dbxref=Genbank:YP_008637717.1,GeneID:17149509;gbkey=CDS;gene=csiR;product=DNA-binding transcriptional dual regulator;protein_id=YP_008637717.1;transl_table=11 DNA-binding transcriptional dual regulator (1021342-1022007 -)	silent gca -> gcG;	1138 1420 1646 1680 1811 220 301 3035 XCP123
NC_022541.1	1021915	c	c	c	G	c	c	G	c	c	G	c	G	c	G	c	G	c	G	G	c	c	c	c	c	c	c	G	cds822;Name=YP_008637717.1;Parent=gene879;Dbxref=Genbank:YP_008637717.1,GeneID:17149509;gbkey=CDS;gene=csiR;product=DNA-binding transcriptional dual regulator;protein_id=YP_008637717.1;transl_table=11 DNA-binding transcriptional dual regulator (1021342-1022007 -)	silent gcg -> gcC;	1138 1420 1646 1680 1811 220 301 3035 XCP123
NC_022541.1	1021918	c	c	c	T	c	c	T	c	c	T	c	T	c	T	c	T	c	T	T	c	c	c	c	c	c	c	T	cds822;Name=YP_008637717.1;Parent=gene879;Dbxref=Genbank:YP_008637717.1,GeneID:17149509;gbkey=CDS;gene=csiR;product=DNA-binding transcriptional dual regulator;protein_id=YP_008637717.1;transl_table=11 DNA-binding transcriptional dual regulator (1021342-1022007 -)	silent gag -> gaA;	1138 1420 1646 1680 1811 220 301 3035 XCP123
NC_022541.1	1021936	g	g	g	C	g	g	C	g	g	C	g	C	g	C	g	C	g	C	C	g	g	g	g	g	g	g	C	cds822;Name=YP_008637717.1;Parent=gene879;Dbxref=Genbank:YP_008637717.1,GeneID:17149509;gbkey=CDS;gene=csiR;product=DNA-binding transcriptional dual regulator;protein_id=YP_008637717.1;transl_table=11 DNA-binding transcriptional dual regulator (1021342-1022007 -)	silent ccc -> ccG;	1138 1420 1646 1680 1811 220 301 3035 XCP123
NC_022541.1	102196	a	a	a	G	a	a	G	a	a	G	a	G	G	G	G	G	a	G	G	a	a	G	G	a	a	a	G	cds82;Name=YP_008636977.1;Parent=gene85;Dbxref=Genbank:YP_008636977.1,GeneID:17152344;gbkey=CDS;product=putative LacI family transcriptional regulator;protein_id=YP_008636977.1;transl_table=11 putative LacI family transcriptional regulator (101822-102880 -)	silent ttg -> Ctg;	1138 1420 1646 1680 1713 1811 2064 220 301 3035 556 557 XCP123
NC_022541.1	102197	c	c	c	T	c	c	T	c	c	T	c	T	c	T	c	T	c	T	T	c	c	c	c	c	c	c	T	cds82;Name=YP_008636977.1;Parent=gene85;Dbxref=Genbank:YP_008636977.1,GeneID:17152344;gbkey=CDS;product=putative LacI family transcriptional regulator;protein_id=YP_008636977.1;transl_table=11 putative LacI family transcriptional regulator (101822-102880 -)	silent gag -> gaA;	1138 1420 1646 1680 1811 220 301 3035 XCP123
NC_022541.1	1022063	c	c	c	T	c	c	T	c	c	T	c	T	c	T	c	T	c	T	T	c	c	c	c	c	c	c	T			1138 1420 1646 1680 1811 220 301 3035 XCP123
NC_022541.1	1022064	g	g	g	g	g	g	g	g	g	g	g	g	T	g	T	g	g	g	g	g	g	T	T	g	g	g	g			1713 2064 556 557
NC_022541.1	1022067	c	c	c	A	c	c	A	c	c	A	c	A	c	A	c	A	c	A	A	c	c	c	c	c	c	c	A			1138 1420 1646 1680 1811 220 301 3035 XCP123
NC_022541.1	1022072	g	g	g	g	g	g	g	g	g	g	g	g	A	g	A	g	g	g	g	g	g	A	A	g	g	g	g			1713 2064 556 557
NC_022541.1	1022072	g	g	g	T	g	g	T	g	g	T	g	T	g	T	g	T	g	T	T	g	g	g	g	g	g	g	T			1138 1420 1646 1680 1811 220 301 3035 XCP123
NC_022541.1	1022073	t	t	t	t	t	t	t	t	t	t	t	t	G	t	G	t	t	t	t	t	t	G	G	t	t	t	t			1713 2064 556 557
NC_022541.1	1022081	a	a	a	a	a	a	a	a	a	a	a	a	G	a	G	a	a	a	a	a	a	G	G	a	a	a	a			1713 2064 556 557
NC_022541.1	1022089	a	a	a	G	a	a	G	a	a	G	a	G	G	G	G	G	a	G	G	a	a	G	G	a	a	a	G			1138 1420 1646 1680 1713 1811 2064 220 301 3035 556 557 XCP123
NC_022541.1	102209	c	c	c	A	c	c	A	c	c	A	c	A	c	A	c	A	c	A	A	c	c	c	c	c	c	c	A	cds82;Name=YP_008636977.1;Parent=gene85;Dbxref=Genbank:YP_008636977.1,GeneID:17152344;gbkey=CDS;product=putative LacI family transcriptional regulator;protein_id=YP_008636977.1;transl_table=11 putative LacI family transcriptional regulator (101822-102880 -)	silent cgg -> cgT;	1138 1420 1646 1680 1811 220 301 3035 XCP123
NC_022541.1	1022138	g	g	g	A	g	g	A	g	g	A	g	A	g	A	g	A	g	A	A	g	g	g	g	g	g	g	A			1138 1420 1646 1680 1811 220 301 3035 XCP123
NC_022541.1	102214	t	t	t	C	t	t	C	t	t	C	t	C	t	C	t	C	t	C	C	t	t	t	t	t	t	t	C	cds82;Name=YP_008636977.1;Parent=gene85;Dbxref=Genbank:YP_008636977.1,GeneID:17152344;gbkey=CDS;product=putative LacI family transcriptional regulator;protein_id=YP_008636977.1;transl_table=11 putative LacI family transcriptional regulator (101822-102880 -)	non-silent acc -> Gcc;	1138 1420 1646 1680 1811 220 301 3035 XCP123
NC_022541.1	1022161	c	c	c	T	c	c	T	c	c	T	c	T	T	T	T	T	c	T	T	c	c	T	T	c	c	c	T			1138 1420 1646 1680 1713 1811 2064 220 301 3035 556 557 XCP123
NC_022541.1	102217	g	g	g	A	g	g	A	g	g	A	g	A	g	A	g	A	g	A	A	g	g	g	g	g	g	g	A	cds82;Name=YP_008636977.1;Parent=gene85;Dbxref=Genbank:YP_008636977.1,GeneID:17152344;gbkey=CDS;product=putative LacI family transcriptional regulator;protein_id=YP_008636977.1;transl_table=11 putative LacI family transcriptional regulator (101822-102880 -)	silent ctg -> Ttg;	1138 1420 1646 1680 1811 220 301 3035 XCP123
NC_022541.1	1022190	g	g	g	C	g	g	C	g	g	C	g	C	g	C	g	C	g	C	C	g	g	g	g	g	g	g	C			1138 1420 1646 1680 1811 220 301 3035 XCP123
NC_022541.1	10222	t	t	t	C	t	t	C	t	t	C	t	C	C	C	C	C	t	C	C	t	t	C	C	t	t	t	C	cds6;Name=YP_008636901.1;Parent=gene6;Dbxref=Genbank:YP_008636901.1,GeneID:17148936;gbkey=CDS;product=hypothetical protein;protein_id=YP_008636901.1;transl_table=11 hypothetical protein (9578-10771 +)	silent agt -> agC;	1138 1420 1646 1680 1713 1811 2064 220 301 3035 556 557 XCP123
NC_022541.1	1022220	t	t	t	C	t	t	C	t	t	C	t	C	t	C	t	C	t	C	C	t	t	t	t	t	t	t	C			1138 1420 1646 1680 1811 220 301 3035 XCP123
NC_022541.1	1022248	c	c	c	G	c	c	G	c	c	G	c	G	c	G	c	G	c	G	G	c	c	c	c	c	c	c	G			1138 1420 1646 1680 1811 220 301 3035 XCP123
NC_022541.1	1022278	g	g	g	A	g	g	A	g	g	A	g	A	g	A	g	A	g	A	A	g	g	g	g	g	g	g	A	cds823;Name=YP_008637718.1;Parent=gene880;Dbxref=Genbank:YP_008637718.1,GeneID:17151850;gbkey=CDS;product=protocatechuate 4%2C5-dioxygenase subunit beta;protein_id=YP_008637718.1;transl_table=11 protocatechuate 4%2C5-dioxygenase subunit beta (1022252-1023148 +)	silent ggg -> ggA;	1138 1420 1646 1680 1811 220 301 3035 XCP123
NC_022541.1	102230	t	t	t	G	t	t	G	t	t	G	t	G	t	G	t	G	t	G	G	t	t	t	t	t	t	t	G	cds82;Name=YP_008636977.1;Parent=gene85;Dbxref=Genbank:YP_008636977.1,GeneID:17152344;gbkey=CDS;product=putative LacI family transcriptional regulator;protein_id=YP_008636977.1;transl_table=11 putative LacI family transcriptional regulator (101822-102880 -)	silent gga -> ggC;	1138 1420 1646 1680 1811 220 301 3035 XCP123
NC_022541.1	1022368	a	a	a	G	a	a	G	a	a	G	a	G	a	G	a	G	a	G	G	a	a	a	a	a	a	a	G	cds823;Name=YP_008637718.1;Parent=gene880;Dbxref=Genbank:YP_008637718.1,GeneID:17151850;gbkey=CDS;product=protocatechuate 4%2C5-dioxygenase subunit beta;protein_id=YP_008637718.1;transl_table=11 protocatechuate 4%2C5-dioxygenase subunit beta (1022252-1023148 +)	silent cca -> ccG;	1138 1420 1646 1680 1811 220 301 3035 XCP123
NC_022541.1	1022374	t	t	t	C	t	t	C	t	t	C	t	C	C	C	C	C	t	C	C	t	t	C	C	t	t	t	C	cds823;Name=YP_008637718.1;Parent=gene880;Dbxref=Genbank:YP_008637718.1,GeneID:17151850;gbkey=CDS;product=protocatechuate 4%2C5-dioxygenase subunit beta;protein_id=YP_008637718.1;transl_table=11 protocatechuate 4%2C5-dioxygenase subunit beta (1022252-1023148 +)	silent gct -> gcC;	1138 1420 1646 1680 1713 1811 2064 220 301 3035 556 557 XCP123
NC_022541.1	1022392	a	a	a	G	a	a	G	a	a	G	a	G	a	G	a	G	a	G	G	a	a	a	a	a	a	a	G	cds823;Name=YP_008637718.1;Parent=gene880;Dbxref=Genbank:YP_008637718.1,GeneID:17151850;gbkey=CDS;product=protocatechuate 4%2C5-dioxygenase subunit beta;protein_id=YP_008637718.1;transl_table=11 protocatechuate 4%2C5-dioxygenase subunit beta (1022252-1023148 +)	silent caa -> caG;	1138 1420 1646 1680 1811 220 301 3035 XCP123
NC_022541.1	1022394	g	g	g	A	g	g	A	g	g	A	g	A	A	A	A	A	g	A	A	g	g	A	A	g	g	g	A	cds823;Name=YP_008637718.1;Parent=gene880;Dbxref=Genbank:YP_008637718.1,GeneID:17151850;gbkey=CDS;product=protocatechuate 4%2C5-dioxygenase subunit beta;protein_id=YP_008637718.1;transl_table=11 protocatechuate 4%2C5-dioxygenase subunit beta (1022252-1023148 +)	non-silent cga -> cAa;	1138 1420 1646 1680 1713 1811 2064 220 301 3035 556 557 XCP123
NC_022541.1	1022473	c	c	c	T	c	c	T	c	c	T	c	T	c	T	c	T	c	T	T	c	c	c	c	c	c	c	T	cds823;Name=YP_008637718.1;Parent=gene880;Dbxref=Genbank:YP_008637718.1,GeneID:17151850;gbkey=CDS;product=protocatechuate 4%2C5-dioxygenase subunit beta;protein_id=YP_008637718.1;transl_table=11 protocatechuate 4%2C5-dioxygenase subunit beta (1022252-1023148 +)	silent ggc -> ggT;	1138 1420 1646 1680 1811 220 301 3035 XCP123
NC_022541.1	1022513	c	c	c	c	c	c	c	c	c	c	c	c	T	c	T	c	c	c	c	c	c	T	T	c	c	c	c	cds823;Name=YP_008637718.1;Parent=gene880;Dbxref=Genbank:YP_008637718.1,GeneID:17151850;gbkey=CDS;product=protocatechuate 4%2C5-dioxygenase subunit beta;protein_id=YP_008637718.1;transl_table=11 protocatechuate 4%2C5-dioxygenase subunit beta (1022252-1023148 +)	silent ctg -> Ttg;	1713 2064 556 557
NC_022541.1	1022530	a	a	a	G	a	a	G	a	a	G	a	G	G	G	G	G	a	G	G	a	a	G	G	a	a	a	G	cds823;Name=YP_008637718.1;Parent=gene880;Dbxref=Genbank:YP_008637718.1,GeneID:17151850;gbkey=CDS;product=protocatechuate 4%2C5-dioxygenase subunit beta;protein_id=YP_008637718.1;transl_table=11 protocatechuate 4%2C5-dioxygenase subunit beta (1022252-1023148 +)	silent cca -> ccG;	1138 1420 1646 1680 1713 1811 2064 220 301 3035 556 557 XCP123
NC_022541.1	102260	g	g	g	A	g	g	A	g	g	A	g	A	g	A	g	A	g	A	A	g	g	g	g	g	g	g	A	cds82;Name=YP_008636977.1;Parent=gene85;Dbxref=Genbank:YP_008636977.1,GeneID:17152344;gbkey=CDS;product=putative LacI family transcriptional regulator;protein_id=YP_008636977.1;transl_table=11 putative LacI family transcriptional regulator (101822-102880 -)	silent gcc -> gcT;	1138 1420 1646 1680 1811 220 301 3035 XCP123
NC_022541.1	1022605	c	c	c	T	c	c	T	c	c	T	c	T	c	T	c	T	c	T	T	c	c	c	c	c	c	c	T	cds823;Name=YP_008637718.1;Parent=gene880;Dbxref=Genbank:YP_008637718.1,GeneID:17151850;gbkey=CDS;product=protocatechuate 4%2C5-dioxygenase subunit beta;protein_id=YP_008637718.1;transl_table=11 protocatechuate 4%2C5-dioxygenase subunit beta (1022252-1023148 +)	silent ttc -> ttT;	1138 1420 1646 1680 1811 220 301 3035 XCP123
NC_022541.1	1022648	c	c	c	T	c	c	T	c	c	T	c	T	c	T	c	T	c	T	T	c	c	c	c	c	c	c	T	cds823;Name=YP_008637718.1;Parent=gene880;Dbxref=Genbank:YP_008637718.1,GeneID:17151850;gbkey=CDS;product=protocatechuate 4%2C5-dioxygenase subunit beta;protein_id=YP_008637718.1;transl_table=11 protocatechuate 4%2C5-dioxygenase subunit beta (1022252-1023148 +)	silent ctg -> Ttg;	1138 1420 1646 1680 1811 220 301 3035 XCP123
NC_022541.1	1022653	a	a	a	a	a	a	a	a	a	a	a	a	a	a	a	a	a	a	a	a	a	a	a	a	a	a	G	cds823;Name=YP_008637718.1;Parent=gene880;Dbxref=Genbank:YP_008637718.1,GeneID:17151850;gbkey=CDS;product=protocatechuate 4%2C5-dioxygenase subunit beta;protein_id=YP_008637718.1;transl_table=11 protocatechuate 4%2C5-dioxygenase subunit beta (1022252-1023148 +)	silent cta -> ctG;	XCP123
NC_022541.1	1022716	t	t	t	C	t	t	C	t	t	C	t	C	t	C	t	C	t	C	C	t	t	t	t	t	t	t	C	cds823;Name=YP_008637718.1;Parent=gene880;Dbxref=Genbank:YP_008637718.1,GeneID:17151850;gbkey=CDS;product=protocatechuate 4%2C5-dioxygenase subunit beta;protein_id=YP_008637718.1;transl_table=11 protocatechuate 4%2C5-dioxygenase subunit beta (1022252-1023148 +)	silent tat -> taC;	1138 1420 1646 1680 1811 220 301 3035 XCP123
NC_022541.1	1022725	g	g	g	A	g	g	A	g	g	A	g	A	g	A	g	A	g	A	A	g	g	g	g	g	g	g	A	cds823;Name=YP_008637718.1;Parent=gene880;Dbxref=Genbank:YP_008637718.1,GeneID:17151850;gbkey=CDS;product=protocatechuate 4%2C5-dioxygenase subunit beta;protein_id=YP_008637718.1;transl_table=11 protocatechuate 4%2C5-dioxygenase subunit beta (1022252-1023148 +)	silent ccg -> ccA;	1138 1420 1646 1680 1811 220 301 3035 XCP123
NC_022541.1	1022728	c	c	c	G	c	c	G	c	c	G	c	G	c	G	c	G	c	G	G	c	c	c	c	c	c	c	G	cds823;Name=YP_008637718.1;Parent=gene880;Dbxref=Genbank:YP_008637718.1,GeneID:17151850;gbkey=CDS;product=protocatechuate 4%2C5-dioxygenase subunit beta;protein_id=YP_008637718.1;transl_table=11 protocatechuate 4%2C5-dioxygenase subunit beta (1022252-1023148 +)	silent acc -> acG;	1138 1420 1646 1680 1811 220 301 3035 XCP123
NC_022541.1	1022761	g	g	g	g	g	g	g	g	g	g	g	g	A	g	A	g	g	g	g	g	g	A	A	g	g	g	g	cds823;Name=YP_008637718.1;Parent=gene880;Dbxref=Genbank:YP_008637718.1,GeneID:17151850;gbkey=CDS;product=protocatechuate 4%2C5-dioxygenase subunit beta;protein_id=YP_008637718.1;transl_table=11 protocatechuate 4%2C5-dioxygenase subunit beta (1022252-1023148 +)	silent gtg -> gtA;	1713 2064 556 557
NC_022541.1	1022767	c	c	c	G	c	c	G	c	c	G	c	G	c	G	c	G	c	G	G	c	c	c	c	c	c	c	G	cds823;Name=YP_008637718.1;Parent=gene880;Dbxref=Genbank:YP_008637718.1,GeneID:17151850;gbkey=CDS;product=protocatechuate 4%2C5-dioxygenase subunit beta;protein_id=YP_008637718.1;transl_table=11 protocatechuate 4%2C5-dioxygenase subunit beta (1022252-1023148 +)	silent cgc -> cgG;	1138 1420 1646 1680 1811 220 301 3035 XCP123
NC_022541.1	1022794	t	t	A	t	t	t	t	t	t	t	t	t	t	t	t	t	t	t	t	t	t	t	t	t	t	t	t	cds823;Name=YP_008637718.1;Parent=gene880;Dbxref=Genbank:YP_008637718.1,GeneID:17151850;gbkey=CDS;product=protocatechuate 4%2C5-dioxygenase subunit beta;protein_id=YP_008637718.1;transl_table=11 protocatechuate 4%2C5-dioxygenase subunit beta (1022252-1023148 +)	silent ctt -> ctA;	1058
NC_022541.1	1022795	c	c	c	c	c	c	c	c	c	c	c	c	c	c	c	c	c	c	c	c	c	c	c	c	c	c	T	cds823;Name=YP_008637718.1;Parent=gene880;Dbxref=Genbank:YP_008637718.1,GeneID:17151850;gbkey=CDS;product=protocatechuate 4%2C5-dioxygenase subunit beta;protein_id=YP_008637718.1;transl_table=11 protocatechuate 4%2C5-dioxygenase subunit beta (1022252-1023148 +)	non-silent cgg -> Tgg;	XCP123
NC_022541.1	1022809	g	g	g	g	g	g	g	g	g	g	g	g	A	g	A	g	g	g	g	g	g	A	A	g	g	g	g	cds823;Name=YP_008637718.1;Parent=gene880;Dbxref=Genbank:YP_008637718.1,GeneID:17151850;gbkey=CDS;product=protocatechuate 4%2C5-dioxygenase subunit beta;protein_id=YP_008637718.1;transl_table=11 protocatechuate 4%2C5-dioxygenase subunit beta (1022252-1023148 +)	silent gtg -> gtA;	1713 2064 556 557
NC_022541.1	1022893	g	g	g	g	g	g	g	g	g	g	g	g	T	g	T	g	g	g	g	g	g	T	T	g	g	g	g	cds823;Name=YP_008637718.1;Parent=gene880;Dbxref=Genbank:YP_008637718.1,GeneID:17151850;gbkey=CDS;product=protocatechuate 4%2C5-dioxygenase subunit beta;protein_id=YP_008637718.1;transl_table=11 protocatechuate 4%2C5-dioxygenase subunit beta (1022252-1023148 +)	silent cgg -> cgT;	1713 2064 556 557
NC_022541.1	1022920	g	g	g	C	g	g	C	g	g	C	g	C	g	C	g	C	g	C	C	g	g	g	g	g	g	g	C	cds823;Name=YP_008637718.1;Parent=gene880;Dbxref=Genbank:YP_008637718.1,GeneID:17151850;gbkey=CDS;product=protocatechuate 4%2C5-dioxygenase subunit beta;protein_id=YP_008637718.1;transl_table=11 protocatechuate 4%2C5-dioxygenase subunit beta (1022252-1023148 +)	silent acg -> acC;	1138 1420 1646 1680 1811 220 301 3035 XCP123
NC_022541.1	1022921	c	c	c	G	c	c	G	c	c	G	c	G	c	G	c	G	c	G	G	c	c	c	c	c	c	c	G	cds823;Name=YP_008637718.1;Parent=gene880;Dbxref=Genbank:YP_008637718.1,GeneID:17151850;gbkey=CDS;product=protocatechuate 4%2C5-dioxygenase subunit beta;protein_id=YP_008637718.1;transl_table=11 protocatechuate 4%2C5-dioxygenase subunit beta (1022252-1023148 +)	non-silent cat -> Gat;	1138 1420 1646 1680 1811 220 301 3035 XCP123
NC_022541.1	1022932	c	c	c	c	c	c	c	c	c	c	c	c	T	c	T	c	c	c	c	c	c	T	T	c	c	c	c	cds823;Name=YP_008637718.1;Parent=gene880;Dbxref=Genbank:YP_008637718.1,GeneID:17151850;gbkey=CDS;product=protocatechuate 4%2C5-dioxygenase subunit beta;protein_id=YP_008637718.1;transl_table=11 protocatechuate 4%2C5-dioxygenase subunit beta (1022252-1023148 +)	silent cac -> caT;	1713 2064 556 557
NC_022541.1	1023055	t	t	t	C	t	t	C	t	t	C	t	C	t	C	t	C	t	C	C	t	t	t	t	t	t	t	C	cds823;Name=YP_008637718.1;Parent=gene880;Dbxref=Genbank:YP_008637718.1,GeneID:17151850;gbkey=CDS;product=protocatechuate 4%2C5-dioxygenase subunit beta;protein_id=YP_008637718.1;transl_table=11 protocatechuate 4%2C5-dioxygenase subunit beta (1022252-1023148 +)	silent act -> acC;	1138 1420 1646 1680 1811 220 301 3035 XCP123
NC_022541.1	1023073	t	t	t	G	t	t	G	t	t	G	t	G	G	G	G	G	t	G	G	t	t	G	G	t	t	t	G	cds823;Name=YP_008637718.1;Parent=gene880;Dbxref=Genbank:YP_008637718.1,GeneID:17151850;gbkey=CDS;product=protocatechuate 4%2C5-dioxygenase subunit beta;protein_id=YP_008637718.1;transl_table=11 protocatechuate 4%2C5-dioxygenase subunit beta (1022252-1023148 +)	silent ctt -> ctG;	1138 1420 1646 1680 1713 1811 2064 220 301 3035 556 557 XCP123
NC_022541.1	1023082	c	c	c	G	c	c	G	c	c	G	c	G	G	G	G	G	c	G	G	c	c	G	G	c	c	c	G	cds823;Name=YP_008637718.1;Parent=gene880;Dbxref=Genbank:YP_008637718.1,GeneID:17151850;gbkey=CDS;product=protocatechuate 4%2C5-dioxygenase subunit beta;protein_id=YP_008637718.1;transl_table=11 protocatechuate 4%2C5-dioxygenase subunit beta (1022252-1023148 +)	silent ccc -> ccG;	1138 1420 1646 1680 1713 1811 2064 220 301 3035 556 557 XCP123
NC_022541.1	1023094	g	g	g	g	g	g	g	g	g	g	g	g	A	g	A	g	g	g	g	g	g	A	A	g	g	g	g	cds823;Name=YP_008637718.1;Parent=gene880;Dbxref=Genbank:YP_008637718.1,GeneID:17151850;gbkey=CDS;product=protocatechuate 4%2C5-dioxygenase subunit beta;protein_id=YP_008637718.1;transl_table=11 protocatechuate 4%2C5-dioxygenase subunit beta (1022252-1023148 +)	silent gcg -> gcA;	1713 2064 556 557
NC_022541.1	1023124	t	t	t	C	t	t	C	t	t	C	t	C	t	C	t	C	t	C	C	t	t	t	t	t	t	t	C	cds823;Name=YP_008637718.1;Parent=gene880;Dbxref=Genbank:YP_008637718.1,GeneID:17151850;gbkey=CDS;product=protocatechuate 4%2C5-dioxygenase subunit beta;protein_id=YP_008637718.1;transl_table=11 protocatechuate 4%2C5-dioxygenase subunit beta (1022252-1023148 +)	silent ctt -> ctC;	1138 1420 1646 1680 1811 220 301 3035 XCP123
NC_022541.1	1023131	a	a	a	G	a	a	G	a	a	G	a	G	a	G	a	G	a	G	G	a	a	a	a	a	a	a	G	cds823;Name=YP_008637718.1;Parent=gene880;Dbxref=Genbank:YP_008637718.1,GeneID:17151850;gbkey=CDS;product=protocatechuate 4%2C5-dioxygenase subunit beta;protein_id=YP_008637718.1;transl_table=11 protocatechuate 4%2C5-dioxygenase subunit beta (1022252-1023148 +)	non-silent act -> Gct;	1138 1420 1646 1680 1811 220 301 3035 XCP123
NC_022541.1	1023139	c	c	c	T	c	c	T	c	c	T	c	T	c	T	c	T	c	T	T	c	c	c	c	c	c	c	T	cds823;Name=YP_008637718.1;Parent=gene880;Dbxref=Genbank:YP_008637718.1,GeneID:17151850;gbkey=CDS;product=protocatechuate 4%2C5-dioxygenase subunit beta;protein_id=YP_008637718.1;transl_table=11 protocatechuate 4%2C5-dioxygenase subunit beta (1022252-1023148 +)	silent gcc -> gcT;	1138 1420 1646 1680 1811 220 301 3035 XCP123
NC_022541.1	1023176	t	t	t	G	t	t	G	t	t	G	t	G	t	G	t	G	t	G	G	t	t	t	t	t	t	t	G	cds824;Name=YP_008637719.1;Parent=gene881;Dbxref=Genbank:YP_008637719.1,GeneID:17149510;gbkey=CDS;product=protocatechuate 4%2C5-dioxygenase subunit alpha;protein_id=YP_008637719.1;transl_table=11 protocatechuate 4%2C5-dioxygenase subunit alpha (1023159-1023518 +)	non-silent cat -> caG;	1138 1420 1646 1680 1811 220 301 3035 XCP123
NC_022541.1	1023197	c	c	c	T	c	c	T	c	c	T	c	T	c	T	c	T	c	T	T	c	c	c	c	c	c	c	T	cds824;Name=YP_008637719.1;Parent=gene881;Dbxref=Genbank:YP_008637719.1,GeneID:17149510;gbkey=CDS;product=protocatechuate 4%2C5-dioxygenase subunit alpha;protein_id=YP_008637719.1;transl_table=11 protocatechuate 4%2C5-dioxygenase subunit alpha (1023159-1023518 +)	silent ggc -> ggT;	1138 1420 1646 1680 1811 220 301 3035 XCP123
NC_022541.1	1023218	t	t	t	t	t	t	t	t	t	t	t	t	C	t	C	t	t	t	t	t	t	C	C	t	t	t	t	cds824;Name=YP_008637719.1;Parent=gene881;Dbxref=Genbank:YP_008637719.1,GeneID:17149510;gbkey=CDS;product=protocatechuate 4%2C5-dioxygenase subunit alpha;protein_id=YP_008637719.1;transl_table=11 protocatechuate 4%2C5-dioxygenase subunit alpha (1023159-1023518 +)	silent cgt -> cgC;	1713 2064 556 557
NC_022541.1	1023233	g	g	g	g	g	g	g	g	g	g	g	g	T	g	T	g	g	g	g	g	g	T	T	g	g	g	g	cds824;Name=YP_008637719.1;Parent=gene881;Dbxref=Genbank:YP_008637719.1,GeneID:17149510;gbkey=CDS;product=protocatechuate 4%2C5-dioxygenase subunit alpha;protein_id=YP_008637719.1;transl_table=11 protocatechuate 4%2C5-dioxygenase subunit alpha (1023159-1023518 +)	silent gcg -> gcT;	1713 2064 556 557
NC_022541.1	1023242	c	c	c	G	c	c	G	c	c	G	c	G	G	G	G	G	c	G	G	c	c	G	G	c	c	c	G	cds824;Name=YP_008637719.1;Parent=gene881;Dbxref=Genbank:YP_008637719.1,GeneID:17149510;gbkey=CDS;product=protocatechuate 4%2C5-dioxygenase subunit alpha;protein_id=YP_008637719.1;transl_table=11 protocatechuate 4%2C5-dioxygenase subunit alpha (1023159-1023518 +)	silent ctc -> ctG;	1138 1420 1646 1680 1713 1811 2064 220 301 3035 556 557 XCP123
NC_022541.1	1023287	g	g	g	T	g	g	T	g	g	T	g	T	T	T	T	T	g	T	T	g	g	T	T	g	g	g	T	cds824;Name=YP_008637719.1;Parent=gene881;Dbxref=Genbank:YP_008637719.1,GeneID:17149510;gbkey=CDS;product=protocatechuate 4%2C5-dioxygenase subunit alpha;protein_id=YP_008637719.1;transl_table=11 protocatechuate 4%2C5-dioxygenase subunit alpha (1023159-1023518 +)	silent cgg -> cgT;	1138 1420 1646 1680 1713 1811 2064 220 301 3035 556 557 XCP123
NC_022541.1	1023305	a	a	a	a	a	a	a	a	a	a	a	a	G	a	G	a	a	a	a	a	a	G	G	a	a	a	a	cds824;Name=YP_008637719.1;Parent=gene881;Dbxref=Genbank:YP_008637719.1,GeneID:17149510;gbkey=CDS;product=protocatechuate 4%2C5-dioxygenase subunit alpha;protein_id=YP_008637719.1;transl_table=11 protocatechuate 4%2C5-dioxygenase subunit alpha (1023159-1023518 +)	silent gaa -> gaG;	1713 2064 556 557
NC_022541.1	1023308	a	a	a	T	a	a	T	a	a	T	a	T	a	T	a	T	a	T	T	a	a	a	a	a	a	a	T	cds824;Name=YP_008637719.1;Parent=gene881;Dbxref=Genbank:YP_008637719.1,GeneID:17149510;gbkey=CDS;product=protocatechuate 4%2C5-dioxygenase subunit alpha;protein_id=YP_008637719.1;transl_table=11 protocatechuate 4%2C5-dioxygenase subunit alpha (1023159-1023518 +)	silent gta -> gtT;	1138 1420 1646 1680 1811 220 301 3035 XCP123
NC_022541.1	1023309	t	t	t	C	t	t	C	t	t	C	t	C	t	C	t	C	t	C	C	t	t	t	t	t	t	t	C	cds824;Name=YP_008637719.1;Parent=gene881;Dbxref=Genbank:YP_008637719.1,GeneID:17149510;gbkey=CDS;product=protocatechuate 4%2C5-dioxygenase subunit alpha;protein_id=YP_008637719.1;transl_table=11 protocatechuate 4%2C5-dioxygenase subunit alpha (1023159-1023518 +)	silent ttg -> Ctg;	1138 1420 1646 1680 1811 220 301 3035 XCP123
NC_022541.1	1023326	a	a	a	a	a	a	a	a	a	a	a	a	C	a	C	a	a	a	a	a	a	C	C	a	a	a	a	cds824;Name=YP_008637719.1;Parent=gene881;Dbxref=Genbank:YP_008637719.1,GeneID:17149510;gbkey=CDS;product=protocatechuate 4%2C5-dioxygenase subunit alpha;protein_id=YP_008637719.1;transl_table=11 protocatechuate 4%2C5-dioxygenase subunit alpha (1023159-1023518 +)	non-silent gaa -> gaC;	1713 2064 556 557
NC_022541.1	1023371	t	t	t	G	t	t	G	t	t	G	t	G	t	G	t	G	t	G	G	t	t	t	t	t	t	t	G	cds824;Name=YP_008637719.1;Parent=gene881;Dbxref=Genbank:YP_008637719.1,GeneID:17149510;gbkey=CDS;product=protocatechuate 4%2C5-dioxygenase subunit alpha;protein_id=YP_008637719.1;transl_table=11 protocatechuate 4%2C5-dioxygenase subunit alpha (1023159-1023518 +)	silent ctt -> ctG;	1138 1420 1646 1680 1811 220 301 3035 XCP123
NC_022541.1	1023383	g	g	g	A	g	g	A	g	g	A	g	A	g	A	g	A	g	A	A	g	g	g	g	g	g	g	A	cds824;Name=YP_008637719.1;Parent=gene881;Dbxref=Genbank:YP_008637719.1,GeneID:17149510;gbkey=CDS;product=protocatechuate 4%2C5-dioxygenase subunit alpha;protein_id=YP_008637719.1;transl_table=11 protocatechuate 4%2C5-dioxygenase subunit alpha (1023159-1023518 +)	silent cag -> caA;	1138 1420 1646 1680 1811 220 301 3035 XCP123
NC_022541.1	1023419	c	c	c	G	c	c	G	c	c	G	c	G	G	G	G	G	c	G	G	c	c	G	G	c	c	c	G	cds824;Name=YP_008637719.1;Parent=gene881;Dbxref=Genbank:YP_008637719.1,GeneID:17149510;gbkey=CDS;product=protocatechuate 4%2C5-dioxygenase subunit alpha;protein_id=YP_008637719.1;transl_table=11 protocatechuate 4%2C5-dioxygenase subunit alpha (1023159-1023518 +)	silent gcc -> gcG;	1138 1420 1646 1680 1713 1811 2064 220 301 3035 556 557 XCP123
NC_022541.1	1023422	t	t	t	C	t	t	C	t	t	C	t	C	C	C	C	C	t	C	C	t	t	C	C	t	t	t	C	cds824;Name=YP_008637719.1;Parent=gene881;Dbxref=Genbank:YP_008637719.1,GeneID:17149510;gbkey=CDS;product=protocatechuate 4%2C5-dioxygenase subunit alpha;protein_id=YP_008637719.1;transl_table=11 protocatechuate 4%2C5-dioxygenase subunit alpha (1023159-1023518 +)	silent cgt -> cgC;	1138 1420 1646 1680 1713 1811 2064 220 301 3035 556 557 XCP123
NC_022541.1	1023521	g	g	g	T	g	g	T	g	g	T	g	T	T	T	T	T	g	T	T	g	g	T	T	g	g	g	T			1138 1420 1646 1680 1713 1811 2064 220 301 3035 556 557 XCP123
NC_022541.1	1023522	g	g	g	g	g	g	g	g	g	g	g	g	A	g	A	g	g	g	g	g	g	A	A	g	g	g	g			1713 2064 556 557
NC_022541.1	1023523	t	t	t	G	t	t	G	t	t	G	t	G	t	G	t	G	t	G	G	t	t	t	t	t	t	t	G			1138 1420 1646 1680 1811 220 301 3035 XCP123
NC_022541.1	1023527	t	t	t	C	t	t	C	t	t	C	t	C	t	C	t	C	t	C	C	t	t	t	t	t	t	t	C			1138 1420 1646 1680 1811 220 301 3035 XCP123
NC_022541.1	1023529	t	t	t	t	t	t	t	t	t	t	t	t	C	t	C	t	t	t	t	t	t	C	C	t	t	t	t			1713 2064 556 557
NC_022541.1	1023529	t	t	t	G	t	t	G	t	t	G	t	G	t	G	t	G	t	G	G	t	t	t	t	t	t	t	G			1138 1420 1646 1680 1811 220 301 3035 XCP123
NC_022541.1	102353	c	c	c	c	c	c	c	c	c	c	c	c	G	c	G	c	c	c	c	c	c	G	G	c	c	c	c	cds82;Name=YP_008636977.1;Parent=gene85;Dbxref=Genbank:YP_008636977.1,GeneID:17152344;gbkey=CDS;product=putative LacI family transcriptional regulator;protein_id=YP_008636977.1;transl_table=11 putative LacI family transcriptional regulator (101822-102880 -)	silent gtg -> gtC;	1713 2064 556 557
NC_022541.1	1023534	c	c	c	c	c	c	c	c	c	c	c	c	T	c	T	c	c	c	c	c	c	T	T	c	c	c	c			1713 2064 556 557
NC_022541.1	1023541	t	t	t	C	t	t	C	t	t	C	t	C	C	C	C	C	t	C	C	t	t	C	C	t	t	t	C			1138 1420 1646 1680 1713 1811 2064 220 301 3035 556 557 XCP123
NC_022541.1	1023548	c	c	c	T	c	c	T	c	c	T	c	T	c	T	c	T	c	T	T	c	c	c	c	c	c	c	T			1138 1420 1646 1680 1811 220 301 3035 XCP123
NC_022541.1	1023554	t	t	t	t	t	t	t	t	t	t	t	t	C	t	C	t	t	t	t	t	t	C	C	t	t	t	t			1713 2064 556 557
NC_022541.1	1023570	g	g	g	C	g	g	C	g	g	C	g	C	g	C	g	C	g	C	C	g	g	g	g	g	g	g	C			1138 1420 1646 1680 1811 220 301 3035 XCP123
NC_022541.1	1023571	t	t	t	C	t	t	C	t	t	C	t	C	t	C	t	C	t	C	C	t	t	t	t	t	t	t	C			1138 1420 1646 1680 1811 220 301 3035 XCP123
NC_022541.1	1023576	c	c	c	T	c	c	T	c	c	T	c	T	c	T	c	T	c	T	T	c	c	c	c	c	c	c	T			1138 1420 1646 1680 1811 220 301 3035 XCP123
NC_022541.1	1023578	c	c	c	T	c	c	T	c	c	T	c	T	c	T	c	T	c	T	T	c	c	c	c	c	c	c	T			1138 1420 1646 1680 1811 220 301 3035 XCP123
NC_022541.1	1023579	a	a	a	T	a	a	T	a	a	T	a	T	a	T	a	T	a	T	T	a	a	a	a	a	a	a	T			1138 1420 1646 1680 1811 220 301 3035 XCP123
NC_022541.1	1023584	c	c	c	A	c	c	A	c	c	A	c	A	c	A	c	A	c	A	A	c	c	c	c	c	c	c	A			1138 1420 1646 1680 1811 220 301 3035 XCP123
NC_022541.1	1023590	a	a	a	C	a	a	C	a	a	C	a	C	C	C	C	C	a	C	C	a	a	C	C	a	a	a	C	cds825;Name=YP_008637720.1;Parent=gene882;Dbxref=Genbank:YP_008637720.1,GeneID:17149511;gbkey=CDS;product=putative LysR family transcriptional regulator;protein_id=YP_008637720.1;transl_table=11 putative LysR family transcriptional regulator (1023585-1024586 +)	silent aca -> acC;	1138 1420 1646 1680 1713 1811 2064 220 301 3035 556 557 XCP123
NC_022541.1	1023596	t	t	t	A	t	t	A	t	t	A	t	A	t	A	t	A	t	A	A	t	t	t	t	t	t	t	A	cds825;Name=YP_008637720.1;Parent=gene882;Dbxref=Genbank:YP_008637720.1,GeneID:17149511;gbkey=CDS;product=putative LysR family transcriptional regulator;protein_id=YP_008637720.1;transl_table=11 putative LysR family transcriptional regulator (1023585-1024586 +)	silent tct -> tcA;	1138 1420 1646 1680 1811 220 301 3035 XCP123
NC_022541.1	1023614	t	t	t	C	t	t	C	t	t	C	t	C	t	C	t	C	t	C	C	t	t	t	t	t	t	t	C	cds825;Name=YP_008637720.1;Parent=gene882;Dbxref=Genbank:YP_008637720.1,GeneID:17149511;gbkey=CDS;product=putative LysR family transcriptional regulator;protein_id=YP_008637720.1;transl_table=11 putative LysR family transcriptional regulator (1023585-1024586 +)	silent cat -> caC;	1138 1420 1646 1680 1811 220 301 3035 XCP123
NC_022541.1	1023641	t	t	t	C	t	t	C	t	t	C	t	C	t	C	t	C	t	C	C	t	t	t	t	t	t	t	C	cds825;Name=YP_008637720.1;Parent=gene882;Dbxref=Genbank:YP_008637720.1,GeneID:17149511;gbkey=CDS;product=putative LysR family transcriptional regulator;protein_id=YP_008637720.1;transl_table=11 putative LysR family transcriptional regulator (1023585-1024586 +)	silent gtt -> gtC;	1138 1420 1646 1680 1811 220 301 3035 XCP123
NC_022541.1	1023647	a	a	a	G	a	a	G	a	a	G	a	G	a	G	a	G	a	G	G	a	a	a	a	a	a	a	G	cds825;Name=YP_008637720.1;Parent=gene882;Dbxref=Genbank:YP_008637720.1,GeneID:17149511;gbkey=CDS;product=putative LysR family transcriptional regulator;protein_id=YP_008637720.1;transl_table=11 putative LysR family transcriptional regulator (1023585-1024586 +)	silent gaa -> gaG;	1138 1420 1646 1680 1811 220 301 3035 XCP123
NC_022541.1	1023690	c	c	c	T	c	c	T	c	c	T	c	T	c	T	c	T	c	T	T	c	c	c	c	c	c	c	T	cds825;Name=YP_008637720.1;Parent=gene882;Dbxref=Genbank:YP_008637720.1,GeneID:17149511;gbkey=CDS;product=putative LysR family transcriptional regulator;protein_id=YP_008637720.1;transl_table=11 putative LysR family transcriptional regulator (1023585-1024586 +)	silent ctg -> Ttg;	1138 1420 1646 1680 1811 220 301 3035 XCP123
NC_022541.1	102370	c	c	c	T	c	c	T	c	c	T	c	T	c	T	c	T	c	T	T	c	c	c	c	c	c	c	T	cds82;Name=YP_008636977.1;Parent=gene85;Dbxref=Genbank:YP_008636977.1,GeneID:17152344;gbkey=CDS;product=putative LacI family transcriptional regulator;protein_id=YP_008636977.1;transl_table=11 putative LacI family transcriptional regulator (101822-102880 -)	non-silent gcc -> Acc;	1138 1420 1646 1680 1811 220 301 3035 XCP123
NC_022541.1	102371	a	a	a	G	a	a	G	a	a	G	a	G	a	G	a	G	a	G	G	a	a	a	a	a	a	a	G	cds82;Name=YP_008636977.1;Parent=gene85;Dbxref=Genbank:YP_008636977.1,GeneID:17152344;gbkey=CDS;product=putative LacI family transcriptional regulator;protein_id=YP_008636977.1;transl_table=11 putative LacI family transcriptional regulator (101822-102880 -)	silent gat -> gaC;	1138 1420 1646 1680 1811 220 301 3035 XCP123
NC_022541.1	1023767	g	g	g	A	g	g	A	g	g	A	g	A	g	A	g	A	g	A	A	g	g	g	g	g	g	g	A	cds825;Name=YP_008637720.1;Parent=gene882;Dbxref=Genbank:YP_008637720.1,GeneID:17149511;gbkey=CDS;product=putative LysR family transcriptional regulator;protein_id=YP_008637720.1;transl_table=11 putative LysR family transcriptional regulator (1023585-1024586 +)	silent cgg -> cgA;	1138 1420 1646 1680 1811 220 301 3035 XCP123
NC_022541.1	1023782	g	g	g	T	g	g	T	g	g	T	g	T	g	T	g	T	g	T	T	g	g	g	g	g	g	g	T	cds825;Name=YP_008637720.1;Parent=gene882;Dbxref=Genbank:YP_008637720.1,GeneID:17149511;gbkey=CDS;product=putative LysR family transcriptional regulator;protein_id=YP_008637720.1;transl_table=11 putative LysR family transcriptional regulator (1023585-1024586 +)	silent gtg -> gtT;	1138 1420 1646 1680 1811 220 301 3035 XCP123
NC_022541.1	1023791	c	c	c	T	c	c	T	c	c	T	c	T	c	T	c	T	c	T	T	c	c	c	c	c	c	c	T	cds825;Name=YP_008637720.1;Parent=gene882;Dbxref=Genbank:YP_008637720.1,GeneID:17149511;gbkey=CDS;product=putative LysR family transcriptional regulator;protein_id=YP_008637720.1;transl_table=11 putative LysR family transcriptional regulator (1023585-1024586 +)	silent aac -> aaT;	1138 1420 1646 1680 1811 220 301 3035 XCP123
NC_022541.1	1023818	t	t	t	G	t	t	G	t	t	G	t	G	t	G	t	G	t	G	G	t	t	t	t	t	t	t	G	cds825;Name=YP_008637720.1;Parent=gene882;Dbxref=Genbank:YP_008637720.1,GeneID:17149511;gbkey=CDS;product=putative LysR family transcriptional regulator;protein_id=YP_008637720.1;transl_table=11 putative LysR family transcriptional regulator (1023585-1024586 +)	silent act -> acG;	1138 1420 1646 1680 1811 220 301 3035 XCP123
NC_022541.1	1023821	g	g	g	A	g	g	A	g	g	A	g	A	g	A	g	A	g	A	A	g	g	g	g	g	g	g	A	cds825;Name=YP_008637720.1;Parent=gene882;Dbxref=Genbank:YP_008637720.1,GeneID:17149511;gbkey=CDS;product=putative LysR family transcriptional regulator;protein_id=YP_008637720.1;transl_table=11 putative LysR family transcriptional regulator (1023585-1024586 +)	silent gcg -> gcA;	1138 1420 1646 1680 1811 220 301 3035 XCP123
NC_022541.1	1023836	t	t	t	G	t	t	G	t	t	G	t	G	G	G	G	G	t	G	G	t	t	G	G	t	t	t	G	cds825;Name=YP_008637720.1;Parent=gene882;Dbxref=Genbank:YP_008637720.1,GeneID:17149511;gbkey=CDS;product=putative LysR family transcriptional regulator;protein_id=YP_008637720.1;transl_table=11 putative LysR family transcriptional regulator (1023585-1024586 +)	silent ggt -> ggG;	1138 1420 1646 1680 1713 1811 2064 220 301 3035 556 557 XCP123
NC_022541.1	1023842	a	a	a	a	a	a	a	a	a	a	a	a	G	a	G	a	a	a	a	a	a	G	G	a	a	a	a	cds825;Name=YP_008637720.1;Parent=gene882;Dbxref=Genbank:YP_008637720.1,GeneID:17149511;gbkey=CDS;product=putative LysR family transcriptional regulator;protein_id=YP_008637720.1;transl_table=11 putative LysR family transcriptional regulator (1023585-1024586 +)	silent cta -> ctG;	1713 2064 556 557
NC_022541.1	1023848	t	t	t	C	t	t	C	t	t	C	t	C	t	C	t	C	t	C	C	t	t	t	t	t	t	t	C	cds825;Name=YP_008637720.1;Parent=gene882;Dbxref=Genbank:YP_008637720.1,GeneID:17149511;gbkey=CDS;product=putative LysR family transcriptional regulator;protein_id=YP_008637720.1;transl_table=11 putative LysR family transcriptional regulator (1023585-1024586 +)	silent cgt -> cgC;	1138 1420 1646 1680 1811 220 301 3035 XCP123
NC_022541.1	1023869	g	g	g	g	g	g	g	g	g	g	g	g	T	g	T	g	g	g	g	g	g	T	T	g	g	g	g	cds825;Name=YP_008637720.1;Parent=gene882;Dbxref=Genbank:YP_008637720.1,GeneID:17149511;gbkey=CDS;product=putative LysR family transcriptional regulator;protein_id=YP_008637720.1;transl_table=11 putative LysR family transcriptional regulator (1023585-1024586 +)	silent ggg -> ggT;	1713 2064 556 557
NC_022541.1	1023954	c	c	c	c	c	c	c	c	c	c	c	c	T	c	T	c	c	c	c	c	c	T	T	c	c	c	c	cds825;Name=YP_008637720.1;Parent=gene882;Dbxref=Genbank:YP_008637720.1,GeneID:17149511;gbkey=CDS;product=putative LysR family transcriptional regulator;protein_id=YP_008637720.1;transl_table=11 putative LysR family transcriptional regulator (1023585-1024586 +)	silent ctg -> Ttg;	1713 2064 556 557
NC_022541.1	102401	g	g	g	g	g	g	g	g	g	g	g	g	A	g	A	g	g	g	g	g	g	A	A	g	g	g	g	cds82;Name=YP_008636977.1;Parent=gene85;Dbxref=Genbank:YP_008636977.1,GeneID:17152344;gbkey=CDS;product=putative LacI family transcriptional regulator;protein_id=YP_008636977.1;transl_table=11 putative LacI family transcriptional regulator (101822-102880 -)	silent cgc -> cgT;	1713 2064 556 557
NC_022541.1	102407	g	g	g	g	g	g	g	g	g	g	g	g	A	g	A	g	g	g	g	g	g	A	A	g	g	g	g	cds82;Name=YP_008636977.1;Parent=gene85;Dbxref=Genbank:YP_008636977.1,GeneID:17152344;gbkey=CDS;product=putative LacI family transcriptional regulator;protein_id=YP_008636977.1;transl_table=11 putative LacI family transcriptional regulator (101822-102880 -)	silent ggc -> ggT;	1713 2064 556 557
NC_022541.1	102407	g	g	g	C	g	g	C	g	g	C	g	C	g	C	g	C	g	C	C	g	g	g	g	g	g	g	C	cds82;Name=YP_008636977.1;Parent=gene85;Dbxref=Genbank:YP_008636977.1,GeneID:17152344;gbkey=CDS;product=putative LacI family transcriptional regulator;protein_id=YP_008636977.1;transl_table=11 putative LacI family transcriptional regulator (101822-102880 -)	silent ggc -> ggG;	1138 1420 1646 1680 1811 220 301 3035 XCP123
NC_022541.1	102413	c	c	c	T	c	c	T	c	c	T	c	T	c	T	c	T	c	T	T	c	c	c	c	c	c	c	T	cds82;Name=YP_008636977.1;Parent=gene85;Dbxref=Genbank:YP_008636977.1,GeneID:17152344;gbkey=CDS;product=putative LacI family transcriptional regulator;protein_id=YP_008636977.1;transl_table=11 putative LacI family transcriptional regulator (101822-102880 -)	silent gag -> gaA;	1138 1420 1646 1680 1811 220 301 3035 XCP123
NC_022541.1	1024148	g	g	g	A	g	g	A	g	g	A	g	A	g	A	g	A	g	A	A	g	g	g	g	g	g	g	A	cds825;Name=YP_008637720.1;Parent=gene882;Dbxref=Genbank:YP_008637720.1,GeneID:17149511;gbkey=CDS;product=putative LysR family transcriptional regulator;protein_id=YP_008637720.1;transl_table=11 putative LysR family transcriptional regulator (1023585-1024586 +)	silent ctg -> ctA;	1138 1420 1646 1680 1811 220 301 3035 XCP123
NC_022541.1	1024151	c	c	c	T	c	c	T	c	c	T	c	T	c	T	c	T	c	T	T	c	c	c	c	c	c	c	T	cds825;Name=YP_008637720.1;Parent=gene882;Dbxref=Genbank:YP_008637720.1,GeneID:17149511;gbkey=CDS;product=putative LysR family transcriptional regulator;protein_id=YP_008637720.1;transl_table=11 putative LysR family transcriptional regulator (1023585-1024586 +)	silent ttc -> ttT;	1138 1420 1646 1680 1811 220 301 3035 XCP123
[truncated: 222,611 more rows]
